# Supplementary material for: Humans read emotional arousal in monkey vocalizations: evidence for evolutionary continuities in communication
Source: PeerJ. 2022 Dec 1;10:e14471. doi: 10.7717/peerj.14471 (PMC9744152; doi:10.7717/peerj.14471)
Supplement: Supplemental Information 1 [file peerj-10-14471-s001.xlsx]

## Sheet: Supplementary data - coos
	SoundFile	Subject	Experienced	Block	BlockPresentationOrder	Trial	CorrectAnswer	Accurate	Response	ReactionTime	Age	Sex	NativeLanguage	WorkWAnimals	Species	MonthsWAnimals	MonthsWRhesus	CloseRelationshipAnimal	EQ	AAS	Notes	CAM_Face	CAM_Voice	CAM_Total	AccuracyScore_AllCoos	AccuraxyScore_AllMixed	AccuracyScore_AllScreams	HighArousal	LowArousal	FileName_FirstCall	Duration.x	MinF0.x	MaxF0.x	F0Range.x	MeanF0.x	StDevF0.x	Start.F0.x	End.F0.x	TofMax_s.x	TofMax_prop.x	OnsetSlope.x	OffsetSlope.x	Jitter.x	Shimmer.x	MaxHNR.x	MeanHNR.x	StDevHNR.x	DFA25.x	DFA50.x
1	01_Dq16_Av17	103	N	2	4	28	1	1	1	238	19	F	Korean + English	Y	dogs, cats	3	NA	Y	47	39		40	41	81	0.52381	0.393939	0.512821	RDq16	RAv17	RDq16_2254.wav	0.867	491.5	1019.9	528.4	826.3	168.34	577	1016	0.8	0.922722	553.625	-58.209	0.000195551	1.63942	34.19	12.18	5.44	937.5	984.4
2	01_Dq16_Av17	37	N	2	2	22	1	1	1	777	19	F	Spanish	N			NA	Y	44	32		NA	NA	NA	0.52381	0.606061	0.641026	RDq16	RAv17	RDq16_2254.wav	0.867	491.5	1019.9	528.4	826.3	168.34	577	1016	0.8	0.922722	553.625	-58.209	0.000195551	1.63942	34.19	12.18	5.44	937.5	984.4
3	01_Dq16_Av17	71	N	2	2	40	1	1	1	42	19	M	English	N			NA	Y	44	36		43	43	86	0.595238	0.424242	0.333333	RDq16	RAv17	RDq16_2254.wav	0.867	491.5	1019.9	528.4	826.3	168.34	577	1016	0.8	0.922722	553.625	-58.209	0.000195551	1.63942	34.19	12.18	5.44	937.5	984.4
4	01_Dq16_Av17	83	N	2	3	4	1	1	1	297	19	F	English	N			NA	Y	55	46		48	46	94	0.5	0.333333	0.487179	RDq16	RAv17	RDq16_2254.wav	0.867	491.5	1019.9	528.4	826.3	168.34	577	1016	0.8	0.922722	553.625	-58.209	0.000195551	1.63942	34.19	12.18	5.44	937.5	984.4
5	01_Dq16_Av17	109	N	2	3	16	1	1	1	634	20	F	English	N			NA	Y	41	33		45	43	88	0.666667	0.727273	0.384615	RDq16	RAv17	RDq16_2254.wav	0.867	491.5	1019.9	528.4	826.3	168.34	577	1016	0.8	0.922722	553.625	-58.209	0.000195551	1.63942	34.19	12.18	5.44	937.5	984.4
6	01_Dq16_Av17	28	N	2	2	11	1	1	1	13	40	F	English	N			NA	Y	50	33		42	NA	NA	0.630952	0.606061	0.564103	RDq16	RAv17	RDq16_2254.wav	0.867	491.5	1019.9	528.4	826.3	168.34	577	1016	0.8	0.922722	553.625	-58.209	0.000195551	1.63942	34.19	12.18	5.44	937.5	984.4
7	01_Dq16_Av17	79	N	2	1	18	1	1	1	212	21	M	English	N			NA	Y	55	38		33	34	67	0.571429	0.393939	0.564103	RDq16	RAv17	RDq16_2254.wav	0.867	491.5	1019.9	528.4	826.3	168.34	577	1016	0.8	0.922722	553.625	-58.209	0.000195551	1.63942	34.19	12.18	5.44	937.5	984.4
8	01_Dq16_Av17	2	N	2	3	38	1	1	1	1583	19	F	English	N			NA	Y	49	42		36	37	73	0.595238	0.0606061	0.641026	RDq16	RAv17	RDq16_2254.wav	0.867	491.5	1019.9	528.4	826.3	168.34	577	1016	0.8	0.922722	553.625	-58.209	0.000195551	1.63942	34.19	12.18	5.44	937.5	984.4
9	01_Dq16_Av17	80	N	2	4	18	1	1	1	362	18	F	English	N			NA	Y	57	34		36	3	39	0.607143	0.545455	0.358974	RDq16	RAv17	RDq16_2254.wav	0.867	491.5	1019.9	528.4	826.3	168.34	577	1016	0.8	0.922722	553.625	-58.209	0.000195551	1.63942	34.19	12.18	5.44	937.5	984.4
10	01_Dq16_Av17	51	N	2	1	19	1	1	1	373	18	F	English	N			NA	Y	31	36		45	44	89	0.654762	0.515152	0.615385	RDq16	RAv17	RDq16_2254.wav	0.867	491.5	1019.9	528.4	826.3	168.34	577	1016	0.8	0.922722	553.625	-58.209	0.000195551	1.63942	34.19	12.18	5.44	937.5	984.4
11	01_Dq16_Av17	42	N	2	2	12	1	1	1	741	19	F	English	N			NA	N	35	28		44	44	88	0.571429	0.454545	0.692308	RDq16	RAv17	RDq16_2254.wav	0.867	491.5	1019.9	528.4	826.3	168.34	577	1016	0.8	0.922722	553.625	-58.209	0.000195551	1.63942	34.19	12.18	5.44	937.5	984.4
12	01_Dq16_Av17	70	N	2	3	7	1	1	1	2158	18	F	English	N			NA	Y	62	34		48	45	93	0.52381	0.242424	0.384615	RDq16	RAv17	RDq16_2254.wav	0.867	491.5	1019.9	528.4	826.3	168.34	577	1016	0.8	0.922722	553.625	-58.209	0.000195551	1.63942	34.19	12.18	5.44	937.5	984.4
13	01_Dq16_Av17	57	N	2	4	5	1	1	1	4	20	F	English	N			NA	N	29	31		27	41	68	0.547619	0.333333	0.538462	RDq16	RAv17	RDq16_2254.wav	0.867	491.5	1019.9	528.4	826.3	168.34	577	1016	0.8	0.922722	553.625	-58.209	0.000195551	1.63942	34.19	12.18	5.44	937.5	984.4
14	01_Dq16_Av17	17	N	2	2	4	1	0	2	1765	19	F	Chinese	N			NA	Y	49	34		NA	NA	NA	0.595238	1	0.487179	RDq16	RAv17	RDq16_2254.wav	0.867	491.5	1019.9	528.4	826.3	168.34	577	1016	0.8	0.922722	553.625	-58.209	0.000195551	1.63942	34.19	12.18	5.44	937.5	984.4
15	01_Dq16_Av17	11	N	2	4	23	1	1	1	3000	20	F	English (mainly) + Hindi	Y	dogs	6	NA	Y	66	45	noted w/ regard to coos that it is upsetting - sounds like they're in pain. Noted surpirse that screams would be more intense context than coos	34	41	75	0.666667	0.545455	0.641026	RDq16	RAv17	RDq16_2254.wav	0.867	491.5	1019.9	528.4	826.3	168.34	577	1016	0.8	0.922722	553.625	-58.209	0.000195551	1.63942	34.19	12.18	5.44	937.5	984.4
16	01_Dq16_Av17	96	N	2	1	12	1	1	1	1411	18	F	English	N			NA	Y	59	39		44	47	91	0.583333	0.727273	0.512821	RDq16	RAv17	RDq16_2254.wav	0.867	491.5	1019.9	528.4	826.3	168.34	577	1016	0.8	0.922722	553.625	-58.209	0.000195551	1.63942	34.19	12.18	5.44	937.5	984.4
17	01_Dq16_Av17	24	N	2	2	28	1	0	2	519	20	M	English	N			NA	N	41	24		35	36	71	0.404762	0.363636	0.666667	RDq16	RAv17	RDq16_2254.wav	0.867	491.5	1019.9	528.4	826.3	168.34	577	1016	0.8	0.922722	553.625	-58.209	0.000195551	1.63942	34.19	12.18	5.44	937.5	984.4
18	01_Dq16_Av17	501	Y	2	4	42	1	0	2	363	26	M	English	Y	lemurs (black white ruffed, ringtail, red bellied, crown, mongoose), Rhesus monkeys, gorillas, orangutans	Lemur: 24, Rh: 48, Gorilla: 12, Orangutan: 12	48	Y	47	37		46	44	90	0.559524	0.69697	0.461538	RDq16	RAv17	RDq16_2254.wav	0.867	491.5	1019.9	528.4	826.3	168.34	577	1016	0.8	0.922722	553.625	-58.209	0.000195551	1.63942	34.19	12.18	5.44	937.5	984.4
19	01_Dq16_Av17	86	N	2	1	27	1	1	1	213	22	M	Chinese	N			NA	Y	44	35		NA	NA	NA	0.666667	0.515152	0.641026	RDq16	RAv17	RDq16_2254.wav	0.867	491.5	1019.9	528.4	826.3	168.34	577	1016	0.8	0.922722	553.625	-58.209	0.000195551	1.63942	34.19	12.18	5.44	937.5	984.4
20	01_Dq16_Av17	99	N	2	1	33	1	1	1	206	19	F	English + Hindi	N			NA	Y	56	37		37	39	76	0.595238	0.30303	0.461538	RDq16	RAv17	RDq16_2254.wav	0.867	491.5	1019.9	528.4	826.3	168.34	577	1016	0.8	0.922722	553.625	-58.209	0.000195551	1.63942	34.19	12.18	5.44	937.5	984.4
21	01_Dq16_Av17	50	N	2	4	5	1	1	1	220	19	F	English	Y	dogs, cats	12	NA	Y	53	40		24	19	43	0.5	0.212121	0.512821	RDq16	RAv17	RDq16_2254.wav	0.867	491.5	1019.9	528.4	826.3	168.34	577	1016	0.8	0.922722	553.625	-58.209	0.000195551	1.63942	34.19	12.18	5.44	937.5	984.4
22	01_Dq16_Av17	88	N	2	1	2	1	0	2	985	19	M	Mandarin	N			NA	Y	49	27		NA	NA	NA	0.547619	0.818182	0.538462	RDq16	RAv17	RDq16_2254.wav	0.867	491.5	1019.9	528.4	826.3	168.34	577	1016	0.8	0.922722	553.625	-58.209	0.000195551	1.63942	34.19	12.18	5.44	937.5	984.4
23	01_Dq16_Av17	3	N	2	2	37	1	1	1	829	28	M	English	N			NA	Y	39	30		45	42	87	0.559524	0.575758	0.487179	RDq16	RAv17	RDq16_2254.wav	0.867	491.5	1019.9	528.4	826.3	168.34	577	1016	0.8	0.922722	553.625	-58.209	0.000195551	1.63942	34.19	12.18	5.44	937.5	984.4
24	01_Dq16_Av17	100	N	2	3	3	1	0	2	621	21	F	Mandarin	N			NA	Y	50	36		NA	NA	NA	0.619048	0.424242	0.641026	RDq16	RAv17	RDq16_2254.wav	0.867	491.5	1019.9	528.4	826.3	168.34	577	1016	0.8	0.922722	553.625	-58.209	0.000195551	1.63942	34.19	12.18	5.44	937.5	984.4
25	01_Dq16_Av17	82	N	2	2	20	1	0	2	888	18	F	Korean	Y	dogs, cats	3	NA	Y	31	40		NA	NA	NA	0.559524	0.333333	0.641026	RDq16	RAv17	RDq16_2254.wav	0.867	491.5	1019.9	528.4	826.3	168.34	577	1016	0.8	0.922722	553.625	-58.209	0.000195551	1.63942	34.19	12.18	5.44	937.5	984.4
26	01_Dq16_Av17	72	N	2	3	33	1	0	2	167	19	F	English	N			NA	Y	48	33		35	31	66	0.511905	0.69697	0.538462	RDq16	RAv17	RDq16_2254.wav	0.867	491.5	1019.9	528.4	826.3	168.34	577	1016	0.8	0.922722	553.625	-58.209	0.000195551	1.63942	34.19	12.18	5.44	937.5	984.4
27	01_Dq16_Av17	20	Y	2	2	23	1	1	1	293	37	F	English	Y	Rhesus, chimpanzees, dogs, cats, mice, rats	180	132	Y	52	33		46	47	93	0.392857	0.454545	0.589744	RDq16	RAv17	RDq16_2254.wav	0.867	491.5	1019.9	528.4	826.3	168.34	577	1016	0.8	0.922722	553.625	-58.209	0.000195551	1.63942	34.19	12.18	5.44	937.5	984.4
28	01_Dq16_Av17	111	N	2	3	23	1	1	1	2197	21	F	English	N			NA	N	39	39		40	36	76	0.511905	0.575758	0.512821	RDq16	RAv17	RDq16_2254.wav	0.867	491.5	1019.9	528.4	826.3	168.34	577	1016	0.8	0.922722	553.625	-58.209	0.000195551	1.63942	34.19	12.18	5.44	937.5	984.4
29	01_Dq16_Av17	110	N	2	1	19	1	1	1	1365	19	M	English	N			NA	Y	40	32		35	38	73	0.511905	0.69697	0.564103	RDq16	RAv17	RDq16_2254.wav	0.867	491.5	1019.9	528.4	826.3	168.34	577	1016	0.8	0.922722	553.625	-58.209	0.000195551	1.63942	34.19	12.18	5.44	937.5	984.4
30	01_Dq16_Av17	33	N	2	2	17	1	0	2	254	19	F	Mandarin + English	N			NA	Y	56	33		NA	NA	NA	0.571429	0.272727	0.615385	RDq16	RAv17	RDq16_2254.wav	0.867	491.5	1019.9	528.4	826.3	168.34	577	1016	0.8	0.922722	553.625	-58.209	0.000195551	1.63942	34.19	12.18	5.44	937.5	984.4
31	01_Dq16_Av17	9	N	2	1	11	1	1	1	403	19	M	English	Y	dogs, cats	3	NA	Y	41	31		35	32	67	0.416667	0.121212	0.435897	RDq16	RAv17	RDq16_2254.wav	0.867	491.5	1019.9	528.4	826.3	168.34	577	1016	0.8	0.922722	553.625	-58.209	0.000195551	1.63942	34.19	12.18	5.44	937.5	984.4
32	01_Dq16_Av17	4	N	2	3	1	1	0	2	410	20	M	English	N			NA	N	43	38		27	24	51	0.559524	0.424242	0.589744	RDq16	RAv17	RDq16_2254.wav	0.867	491.5	1019.9	528.4	826.3	168.34	577	1016	0.8	0.922722	553.625	-58.209	0.000195551	1.63942	34.19	12.18	5.44	937.5	984.4
33	01_Dq16_Av17	22	N	2	1	14	1	1	1	539	31	F	English	Y	dogs, cats	6	NA	Y	56	49		47	46	93	0.452381	0.515152	0.692308	RDq16	RAv17	RDq16_2254.wav	0.867	491.5	1019.9	528.4	826.3	168.34	577	1016	0.8	0.922722	553.625	-58.209	0.000195551	1.63942	34.19	12.18	5.44	937.5	984.4
34	01_Dq16_Av17	105	N	2	2	24	1	1	1	766	19	F	English	N			NA	Y	44	36		40	42	82	0.571429	0.606061	0.435897	RDq16	RAv17	RDq16_2254.wav	0.867	491.5	1019.9	528.4	826.3	168.34	577	1016	0.8	0.922722	553.625	-58.209	0.000195551	1.63942	34.19	12.18	5.44	937.5	984.4
35	01_Dq16_Av17	101	N	2	4	8	1	1	1	382	19	F	English	Y	mice	11	NA	Y	50	40		43	43	86	0.690476	0.484848	0.487179	RDq16	RAv17	RDq16_2254.wav	0.867	491.5	1019.9	528.4	826.3	168.34	577	1016	0.8	0.922722	553.625	-58.209	0.000195551	1.63942	34.19	12.18	5.44	937.5	984.4
36	01_Dq16_Av17	48	N	2	1	9	1	1	1	281	19	F	English	N			NA	Y	33	36		36	46	82	0.654762	0.606061	0.564103	RDq16	RAv17	RDq16_2254.wav	0.867	491.5	1019.9	528.4	826.3	168.34	577	1016	0.8	0.922722	553.625	-58.209	0.000195551	1.63942	34.19	12.18	5.44	937.5	984.4
37	01_Dq16_Av17	6	N	2	1	36	1	1	1	261	23	M	English	Y	mice	3	NA	Y	31	28		38	41	79	0.595238	0.484848	0.589744	RDq16	RAv17	RDq16_2254.wav	0.867	491.5	1019.9	528.4	826.3	168.34	577	1016	0.8	0.922722	553.625	-58.209	0.000195551	1.63942	34.19	12.18	5.44	937.5	984.4
38	01_Dq16_Av17	115	N	2	4	42	1	0	2	433	18	M	Mandarin	N			NA	N	31	37		NA	NA	NA	0.583333	0.575758	0.461538	RDq16	RAv17	RDq16_2254.wav	0.867	491.5	1019.9	528.4	826.3	168.34	577	1016	0.8	0.922722	553.625	-58.209	0.000195551	1.63942	34.19	12.18	5.44	937.5	984.4
39	01_Dq16_Av17	32	N	2	1	6	1	1	1	392	23	F	English	N			NA	N	58	26		34	33	67	0.559524	0.424242	0.435897	RDq16	RAv17	RDq16_2254.wav	0.867	491.5	1019.9	528.4	826.3	168.34	577	1016	0.8	0.922722	553.625	-58.209	0.000195551	1.63942	34.19	12.18	5.44	937.5	984.4
40	01_Dq16_Av17	56	N	2	2	9	1	1	1	350	18	F	Chinese	N			NA	Y	31	30		NA	NA	NA	0.595238	0.575758	0.384615	RDq16	RAv17	RDq16_2254.wav	0.867	491.5	1019.9	528.4	826.3	168.34	577	1016	0.8	0.922722	553.625	-58.209	0.000195551	1.63942	34.19	12.18	5.44	937.5	984.4
41	01_Dq16_Av17	35	N	2	1	19	1	1	1	625	19	M	English	N			NA	N	40	21		44	39	83	0.666667	0.818182	0.641026	RDq16	RAv17	RDq16_2254.wav	0.867	491.5	1019.9	528.4	826.3	168.34	577	1016	0.8	0.922722	553.625	-58.209	0.000195551	1.63942	34.19	12.18	5.44	937.5	984.4
42	01_Dq16_Av17	36	N	2	3	20	1	1	1	328	19	F	English	Y	dogs, cats	4	NA	Y	53	31		42	42	84	0.416667	0.606061	0.435897	RDq16	RAv17	RDq16_2254.wav	0.867	491.5	1019.9	528.4	826.3	168.34	577	1016	0.8	0.922722	553.625	-58.209	0.000195551	1.63942	34.19	12.18	5.44	937.5	984.4
43	01_Dq16_Av17	509	Y	2	1	5	1	0	2	328	28	M	Spanish/English	Y	Rhesus macaque, mangabey	48	48	Y	NA	NA		NA	NA	NA	0.464286	0.969697	0.615385	RDq16	RAv17	RDq16_2254.wav	0.867	491.5	1019.9	528.4	826.3	168.34	577	1016	0.8	0.922722	553.625	-58.209	0.000195551	1.63942	34.19	12.18	5.44	937.5	984.4
44	01_Dq16_Av17	66	N	2	2	15	1	0	2	2845	20	M	Chinese	N			NA	N	41	38		NA	NA	NA	0.47619	0.69697	0.512821	RDq16	RAv17	RDq16_2254.wav	0.867	491.5	1019.9	528.4	826.3	168.34	577	1016	0.8	0.922722	553.625	-58.209	0.000195551	1.63942	34.19	12.18	5.44	937.5	984.4
45	01_Dq16_Av17	14	N	2	1	22	1	0	2	1817	19	M	English and Mandarin	N			NA	N	43	35		32	39	71	0.642857	0.818182	0.615385	RDq16	RAv17	RDq16_2254.wav	0.867	491.5	1019.9	528.4	826.3	168.34	577	1016	0.8	0.922722	553.625	-58.209	0.000195551	1.63942	34.19	12.18	5.44	937.5	984.4
46	01_Dq16_Av17	12	N	2	4	32	1	1	1	313	21	M	Chinese	N			NA	Y	41	34		NA	NA	NA	0.642857	0.484848	0.410256	RDq16	RAv17	RDq16_2254.wav	0.867	491.5	1019.9	528.4	826.3	168.34	577	1016	0.8	0.922722	553.625	-58.209	0.000195551	1.63942	34.19	12.18	5.44	937.5	984.4
47	01_Dq16_Av17	39	N	2	3	26	1	1	1	351	19	F	Spanish/English	N			NA	Y	55	38		41	43	84	0.583333	0.454545	0.538462	RDq16	RAv17	RDq16_2254.wav	0.867	491.5	1019.9	528.4	826.3	168.34	577	1016	0.8	0.922722	553.625	-58.209	0.000195551	1.63942	34.19	12.18	5.44	937.5	984.4
48	01_Dq16_Av17	76	N	2	4	11	1	1	1	887	19	F	Chinese	N			NA	Y	41	41		NA	NA	NA	0.630952	0.393939	0.538462	RDq16	RAv17	RDq16_2254.wav	0.867	491.5	1019.9	528.4	826.3	168.34	577	1016	0.8	0.922722	553.625	-58.209	0.000195551	1.63942	34.19	12.18	5.44	937.5	984.4
49	01_Dq16_Av17	52	N	2	2	23	1	1	1	701	19	F	English	N			NA	Y	55	38		42	43	85	0.619048	0.393939	0.512821	RDq16	RAv17	RDq16_2254.wav	0.867	491.5	1019.9	528.4	826.3	168.34	577	1016	0.8	0.922722	553.625	-58.209	0.000195551	1.63942	34.19	12.18	5.44	937.5	984.4
50	01_Dq16_Av17	1	N	2	1	5	1	1	1	634	20	F	English	Y	cats, dogs	12	NA	Y	38	33		NA	40	NA	0.642857	0.333333	0.564103	RDq16	RAv17	RDq16_2254.wav	0.867	491.5	1019.9	528.4	826.3	168.34	577	1016	0.8	0.922722	553.625	-58.209	0.000195551	1.63942	34.19	12.18	5.44	937.5	984.4
51	01_Dq16_Av17	21	N	2	1	40	1	0	2	2036	20	F	English	Y	dogs	6	NA	Y	44	37		41	34	75	0.630952	0.787879	0.384615	RDq16	RAv17	RDq16_2254.wav	0.867	491.5	1019.9	528.4	826.3	168.34	577	1016	0.8	0.922722	553.625	-58.209	0.000195551	1.63942	34.19	12.18	5.44	937.5	984.4
52	01_Dq16_Av17	31	N	2	4	7	1	1	1	537	18	F	English	N			NA	Y	47	35		38	40	78	0.583333	0.575758	0.384615	RDq16	RAv17	RDq16_2254.wav	0.867	491.5	1019.9	528.4	826.3	168.34	577	1016	0.8	0.922722	553.625	-58.209	0.000195551	1.63942	34.19	12.18	5.44	937.5	984.4
53	01_Dq16_Av17	102	N	2	1	34	1	1	1	283	18	F	English	Y	elephants, dogs, tortoises	3	NA	Y	46	44		33	36	69	0.559524	0.424242	0.461538	RDq16	RAv17	RDq16_2254.wav	0.867	491.5	1019.9	528.4	826.3	168.34	577	1016	0.8	0.922722	553.625	-58.209	0.000195551	1.63942	34.19	12.18	5.44	937.5	984.4
54	01_Dq16_Av17	7	N	2	1	3	1	1	1	802	21	F	English	N			NA	Y	49	33		44	43	87	0.583333	0.363636	0.615385	RDq16	RAv17	RDq16_2254.wav	0.867	491.5	1019.9	528.4	826.3	168.34	577	1016	0.8	0.922722	553.625	-58.209	0.000195551	1.63942	34.19	12.18	5.44	937.5	984.4
55	01_Dq16_Av17	29	N	2	1	15	1	0	2	336	19	F	English	Y	dogs, cats	3	NA	Y	63	44		47	41	88	0.547619	0.454545	0.512821	RDq16	RAv17	RDq16_2254.wav	0.867	491.5	1019.9	528.4	826.3	168.34	577	1016	0.8	0.922722	553.625	-58.209	0.000195551	1.63942	34.19	12.18	5.44	937.5	984.4
56	01_Dq16_Av17	512	Y	2	2	8	1	0	2	208	39	M	English	Y	Rhesus macaque, pigtail macaque, common chimpanzee, west lowland gorilla, Sooty mangabey	144	144	Y	NA	NA	occasionally needed to answer radio during task	NA	NA	NA	0.642857	1	0.589744	RDq16	RAv17	RDq16_2254.wav	0.867	491.5	1019.9	528.4	826.3	168.34	577	1016	0.8	0.922722	553.625	-58.209	0.000195551	1.63942	34.19	12.18	5.44	937.5	984.4
57	01_Dq16_Av17	64	N	2	4	30	1	1	1	774	18	F	English	N			NA	N	55	36		40	42	82	0.654762	0.393939	0.666667	RDq16	RAv17	RDq16_2254.wav	0.867	491.5	1019.9	528.4	826.3	168.34	577	1016	0.8	0.922722	553.625	-58.209	0.000195551	1.63942	34.19	12.18	5.44	937.5	984.4
58	01_Dq16_Av17	19	N	2	3	18	1	1	1	299	51	F	English	Y	mice	240	NA	Y	36	29		43	47	90	0.511905	0.575758	0.487179	RDq16	RAv17	RDq16_2254.wav	0.867	491.5	1019.9	528.4	826.3	168.34	577	1016	0.8	0.922722	553.625	-58.209	0.000195551	1.63942	34.19	12.18	5.44	937.5	984.4
59	01_Dq16_Av17	30	N	2	1	27	1	0	2	716	19	F	Chinese	N			NA	N	43	31		NA	NA	NA	0.535714	0.151515	0.641026	RDq16	RAv17	RDq16_2254.wav	0.867	491.5	1019.9	528.4	826.3	168.34	577	1016	0.8	0.922722	553.625	-58.209	0.000195551	1.63942	34.19	12.18	5.44	937.5	984.4
60	01_Dq16_Av17	87	N	2	4	8	1	1	1	3198	19	F	Korean	N			NA	Y	53	41		NA	NA	NA	0.654762	0.787879	0.615385	RDq16	RAv17	RDq16_2254.wav	0.867	491.5	1019.9	528.4	826.3	168.34	577	1016	0.8	0.922722	553.625	-58.209	0.000195551	1.63942	34.19	12.18	5.44	937.5	984.4
61	01_Dq16_Av17	53	N	2	1	19	1	0	2	418	18	F	English	N			NA	N	71	47		22	17	39	0.642857	0.787879	0.641026	RDq16	RAv17	RDq16_2254.wav	0.867	491.5	1019.9	528.4	826.3	168.34	577	1016	0.8	0.922722	553.625	-58.209	0.000195551	1.63942	34.19	12.18	5.44	937.5	984.4
62	01_Dq16_Av17	26	N	2	1	33	1	1	1	208	24	M	Telugu	N			NA	N	41	35		NA	NA	NA	0.607143	0.515152	0.538462	RDq16	RAv17	RDq16_2254.wav	0.867	491.5	1019.9	528.4	826.3	168.34	577	1016	0.8	0.922722	553.625	-58.209	0.000195551	1.63942	34.19	12.18	5.44	937.5	984.4
63	01_Dq16_Av17	67	N	2	3	22	1	1	1	1101	18	F	English	N			NA	N	29	44		32	32	64	0.75	0.636364	0.564103	RDq16	RAv17	RDq16_2254.wav	0.867	491.5	1019.9	528.4	826.3	168.34	577	1016	0.8	0.922722	553.625	-58.209	0.000195551	1.63942	34.19	12.18	5.44	937.5	984.4
64	01_Dq16_Av17	40	N	2	2	4	1	0	2	413	19	F	Chinese	N			NA	N	39	39		NA	NA	NA	0.666667	0.515152	0.512821	RDq16	RAv17	RDq16_2254.wav	0.867	491.5	1019.9	528.4	826.3	168.34	577	1016	0.8	0.922722	553.625	-58.209	0.000195551	1.63942	34.19	12.18	5.44	937.5	984.4
65	01_Dq16_Av17	74	N	2	4	25	1	1	1	272	19	F	English	Y	cats, dogs	1	NA	Y	47	41		41	43	84	0.428571	0.272727	0.538462	RDq16	RAv17	RDq16_2254.wav	0.867	491.5	1019.9	528.4	826.3	168.34	577	1016	0.8	0.922722	553.625	-58.209	0.000195551	1.63942	34.19	12.18	5.44	937.5	984.4
66	01_Dq16_Av17	49	N	2	4	11	1	1	1	987	18	F	English	N			NA	N	44	28		42	2	44	0.642857	0.454545	0.487179	RDq16	RAv17	RDq16_2254.wav	0.867	491.5	1019.9	528.4	826.3	168.34	577	1016	0.8	0.922722	553.625	-58.209	0.000195551	1.63942	34.19	12.18	5.44	937.5	984.4
67	01_Dq16_Av17	90	N	2	3	12	1	0	2	224	21	M	English	N			NA	N	43	24		42	42	84	0.52381	0.69697	0.641026	RDq16	RAv17	RDq16_2254.wav	0.867	491.5	1019.9	528.4	826.3	168.34	577	1016	0.8	0.922722	553.625	-58.209	0.000195551	1.63942	34.19	12.18	5.44	937.5	984.4
68	01_Dq16_Av17	15	N	2	4	32	1	1	1	484	20	F	English and Chinese	N			NA	Y	58	36	didn't make it to face - just voice	NA	36	NA	0.488095	0.393939	0.461538	RDq16	RAv17	RDq16_2254.wav	0.867	491.5	1019.9	528.4	826.3	168.34	577	1016	0.8	0.922722	553.625	-58.209	0.000195551	1.63942	34.19	12.18	5.44	937.5	984.4
69	01_Dq16_Av17	16	N	2	1	25	1	0	2	247	21	F	English	Y	dogs, cats	6	NA	Y	44	43		38	40	78	0.559524	0.545455	0.461538	RDq16	RAv17	RDq16_2254.wav	0.867	491.5	1019.9	528.4	826.3	168.34	577	1016	0.8	0.922722	553.625	-58.209	0.000195551	1.63942	34.19	12.18	5.44	937.5	984.4
70	01_Dq16_Av17	92	N	2	2	20	1	0	2	564	18	F	English	N			NA	Y	45	30		36	36	72	0.595238	0.212121	0.589744	RDq16	RAv17	RDq16_2254.wav	0.867	491.5	1019.9	528.4	826.3	168.34	577	1016	0.8	0.922722	553.625	-58.209	0.000195551	1.63942	34.19	12.18	5.44	937.5	984.4
71	01_Dq16_Av17	513	Y	2	1	42	1	0	2	824	53	F	English	Y	chimps, bonobos, Rhesus macaque, Sooty mangabeys, pigtail macaque, gibbons, orangutan, stumptail macaques, baboons	288	288	Y	NA	NA		NA	NA	NA	0.535714	0.969697	0.589744	RDq16	RAv17	RDq16_2254.wav	0.867	491.5	1019.9	528.4	826.3	168.34	577	1016	0.8	0.922722	553.625	-58.209	0.000195551	1.63942	34.19	12.18	5.44	937.5	984.4
72	01_Dq16_Av17	38	N	2	4	31	1	1	1	1320	18	F	English	N			NA	Y	57	36		41	41	82	0.619048	0.606061	0.615385	RDq16	RAv17	RDq16_2254.wav	0.867	491.5	1019.9	528.4	826.3	168.34	577	1016	0.8	0.922722	553.625	-58.209	0.000195551	1.63942	34.19	12.18	5.44	937.5	984.4
73	01_Dq16_Av17	508	Y	2	2	36	1	1	1	664	40	F	English	Y	Rhesus macaque, pigtail macaque, sooty mangabey	192	120	Y	NA	NA		NA	NA	NA	0.511905	0.969697	0.641026	RDq16	RAv17	RDq16_2254.wav	0.867	491.5	1019.9	528.4	826.3	168.34	577	1016	0.8	0.922722	553.625	-58.209	0.000195551	1.63942	34.19	12.18	5.44	937.5	984.4
74	01_Dq16_Av17	58	N	2	1	17	1	0	2	603	21	F	Spanish	Y	mice, rats	2	NA	Y	53	33		NA	NA	NA	0.547619	0.515152	0.461538	RDq16	RAv17	RDq16_2254.wav	0.867	491.5	1019.9	528.4	826.3	168.34	577	1016	0.8	0.922722	553.625	-58.209	0.000195551	1.63942	34.19	12.18	5.44	937.5	984.4
75	01_Dq16_Av17	47	N	2	3	23	1	0	2	309	18	F	English	N			NA	Y	60	42		42	45	87	0.47619	0.30303	0.333333	RDq16	RAv17	RDq16_2254.wav	0.867	491.5	1019.9	528.4	826.3	168.34	577	1016	0.8	0.922722	553.625	-58.209	0.000195551	1.63942	34.19	12.18	5.44	937.5	984.4
76	01_Dq16_Av17	89	N	2	1	29	1	1	1	571	18	F	Spanish	N			NA	Y	50	37		NA	NA	NA	0.619048	0.818182	0.589744	RDq16	RAv17	RDq16_2254.wav	0.867	491.5	1019.9	528.4	826.3	168.34	577	1016	0.8	0.922722	553.625	-58.209	0.000195551	1.63942	34.19	12.18	5.44	937.5	984.4
77	01_Dq16_Av17	97	N	2	4	6	1	0	2	790	19	F	English	N			NA	Y	48	28		40	43	83	0.595238	0.606061	0.487179	RDq16	RAv17	RDq16_2254.wav	0.867	491.5	1019.9	528.4	826.3	168.34	577	1016	0.8	0.922722	553.625	-58.209	0.000195551	1.63942	34.19	12.18	5.44	937.5	984.4
78	01_Dq16_Av17	84	N	2	3	13	1	1	1	465	19	F	English	N			NA	Y	34	36		35	37	72	0.547619	0.575758	0.512821	RDq16	RAv17	RDq16_2254.wav	0.867	491.5	1019.9	528.4	826.3	168.34	577	1016	0.8	0.922722	553.625	-58.209	0.000195551	1.63942	34.19	12.18	5.44	937.5	984.4
79	01_Dq16_Av17	61	N	2	4	27	1	0	2	451	19	M	English	N			NA	Y	42	36		43	35	78	0.619048	0.424242	0.461538	RDq16	RAv17	RDq16_2254.wav	0.867	491.5	1019.9	528.4	826.3	168.34	577	1016	0.8	0.922722	553.625	-58.209	0.000195551	1.63942	34.19	12.18	5.44	937.5	984.4
80	01_Dq16_Av17	55	N	2	4	11	1	1	1	281	18	F	Mandarin	N			NA	Y	64	30		NA	NA	NA	0.690476	0.515152	0.410256	RDq16	RAv17	RDq16_2254.wav	0.867	491.5	1019.9	528.4	826.3	168.34	577	1016	0.8	0.922722	553.625	-58.209	0.000195551	1.63942	34.19	12.18	5.44	937.5	984.4
81	01_Dq16_Av17	60	N	2	2	27	1	0	2	556	18	F	Chinese	N			NA	Y	54	33		NA	NA	NA	0.595238	0.69697	0.615385	RDq16	RAv17	RDq16_2254.wav	0.867	491.5	1019.9	528.4	826.3	168.34	577	1016	0.8	0.922722	553.625	-58.209	0.000195551	1.63942	34.19	12.18	5.44	937.5	984.4
82	01_Dq16_Av17	75	N	2	2	39	1	1	1	2082	19	M	Chinese	Y	fruitfly, termites	1.5	NA	N	58	38		NA	NA	NA	0.547619	0.484848	0.461538	RDq16	RAv17	RDq16_2254.wav	0.867	491.5	1019.9	528.4	826.3	168.34	577	1016	0.8	0.922722	553.625	-58.209	0.000195551	1.63942	34.19	12.18	5.44	937.5	984.4
83	01_Dq16_Av17	78	N	2	2	29	1	1	1	151	20	M	Spanish	Y	dogs, snakes	2	NA	Y	45	35		NA	NA	NA	0.547619	0.424242	0.487179	RDq16	RAv17	RDq16_2254.wav	0.867	491.5	1019.9	528.4	826.3	168.34	577	1016	0.8	0.922722	553.625	-58.209	0.000195551	1.63942	34.19	12.18	5.44	937.5	984.4
84	01_Dq16_Av17	63	N	2	4	38	1	0	2	1078	19	F	English	N			NA	N	60	40		44	42	86	0.535714	0	0.717949	RDq16	RAv17	RDq16_2254.wav	0.867	491.5	1019.9	528.4	826.3	168.34	577	1016	0.8	0.922722	553.625	-58.209	0.000195551	1.63942	34.19	12.18	5.44	937.5	984.4
85	01_Dq16_Av17	68	N	2	2	29	1	0	2	964	19	M	Spanish	N			NA	N	48	NA	didn't fill out this questionnaire animal	NA	NA	NA	0.607143	0.333333	0.641026	RDq16	RAv17	RDq16_2254.wav	0.867	491.5	1019.9	528.4	826.3	168.34	577	1016	0.8	0.922722	553.625	-58.209	0.000195551	1.63942	34.19	12.18	5.44	937.5	984.4
86	01_Dq16_Av17	27	N	2	4	5	1	1	1	770	23	F	Telugu	N			NA	N	32	44		NA	NA	NA	0.547619	0.151515	0.512821	RDq16	RAv17	RDq16_2254.wav	0.867	491.5	1019.9	528.4	826.3	168.34	577	1016	0.8	0.922722	553.625	-58.209	0.000195551	1.63942	34.19	12.18	5.44	937.5	984.4
87	01_Dq16_Av17	65	N	2	2	33	1	0	2	221	20	F	Arabic	Y			NA	N	36	35		NA	NA	NA	0.559524	0.363636	0.564103	RDq16	RAv17	RDq16_2254.wav	0.867	491.5	1019.9	528.4	826.3	168.34	577	1016	0.8	0.922722	553.625	-58.209	0.000195551	1.63942	34.19	12.18	5.44	937.5	984.4
88	01_Dq16_Av17	62	N	2	4	37	1	1	1	304	18	F	English	Y	mice	1	NA	Y	59	32		46	40	86	0.559524	0.484848	0.538462	RDq16	RAv17	RDq16_2254.wav	0.867	491.5	1019.9	528.4	826.3	168.34	577	1016	0.8	0.922722	553.625	-58.209	0.000195551	1.63942	34.19	12.18	5.44	937.5	984.4
89	01_Dq16_Av17	106	N	2	4	39	1	0	2	235	18	F	Korean	N			NA	Y	53	39		NA	NA	NA	0.607143	0.606061	0.461538	RDq16	RAv17	RDq16_2254.wav	0.867	491.5	1019.9	528.4	826.3	168.34	577	1016	0.8	0.922722	553.625	-58.209	0.000195551	1.63942	34.19	12.18	5.44	937.5	984.4
90	01_Dq16_Av17	10	N	2	3	33	1	0	2	2017	21	F	English	N			NA	Y	50	38		36	38	74	0.559524	0.757576	0.358974	RDq16	RAv17	RDq16_2254.wav	0.867	491.5	1019.9	528.4	826.3	168.34	577	1016	0.8	0.922722	553.625	-58.209	0.000195551	1.63942	34.19	12.18	5.44	937.5	984.4
91	01_Dq16_Av17	95	N	2	2	27	1	1	1	787	20	F	English	N			NA	Y	57	30		39	44	83	0.571429	0.363636	0.564103	RDq16	RAv17	RDq16_2254.wav	0.867	491.5	1019.9	528.4	826.3	168.34	577	1016	0.8	0.922722	553.625	-58.209	0.000195551	1.63942	34.19	12.18	5.44	937.5	984.4
92	01_Dq16_Av17	506	Y	2	2	16	1	1	1	715	37	F	English	Y	Rhesus macaque	120	120	Y	NA	NA		NA	NA	NA	0.559524	0.424242	0.487179	RDq16	RAv17	RDq16_2254.wav	0.867	491.5	1019.9	528.4	826.3	168.34	577	1016	0.8	0.922722	553.625	-58.209	0.000195551	1.63942	34.19	12.18	5.44	937.5	984.4
93	01_Dq16_Av17	13	N	2	4	18	1	1	1	637	19	F	English	N			NA	N	21	34		42	41	83	0.5	0.666667	0.487179	RDq16	RAv17	RDq16_2254.wav	0.867	491.5	1019.9	528.4	826.3	168.34	577	1016	0.8	0.922722	553.625	-58.209	0.000195551	1.63942	34.19	12.18	5.44	937.5	984.4
94	01_Dq16_Av17	41	N	2	4	5	1	1	1	257	20	M	Vietnamese	N			NA	Y	45	29		NA	NA	NA	0.630952	0.454545	0.435897	RDq16	RAv17	RDq16_2254.wav	0.867	491.5	1019.9	528.4	826.3	168.34	577	1016	0.8	0.922722	553.625	-58.209	0.000195551	1.63942	34.19	12.18	5.44	937.5	984.4
95	01_Dq16_Av17	507	Y	2	1	41	1	1	1	607	27	F	English	Y	Rhesus macaque, tufted capuchins	60	48	Y	NA	NA		NA	NA	NA	0.547619	1	0.666667	RDq16	RAv17	RDq16_2254.wav	0.867	491.5	1019.9	528.4	826.3	168.34	577	1016	0.8	0.922722	553.625	-58.209	0.000195551	1.63942	34.19	12.18	5.44	937.5	984.4
96	01_Dq16_Av17	511	Y	2	1	29	1	1	1	696	24	F	English	Y	Rhesus macaque, domestic cats	24	24	Y	NA	NA		NA	NA	NA	0.571429	0.69697	0.512821	RDq16	RAv17	RDq16_2254.wav	0.867	491.5	1019.9	528.4	826.3	168.34	577	1016	0.8	0.922722	553.625	-58.209	0.000195551	1.63942	34.19	12.18	5.44	937.5	984.4
97	01_Dq16_Av17	77	N	2	3	4	1	1	1	696	19	M	Chinese	N			NA	Y	46	18		NA	NA	NA	0.595238	0.454545	0.538462	RDq16	RAv17	RDq16_2254.wav	0.867	491.5	1019.9	528.4	826.3	168.34	577	1016	0.8	0.922722	553.625	-58.209	0.000195551	1.63942	34.19	12.18	5.44	937.5	984.4
98	01_Dq16_Av17	85	N	2	1	38	1	0	2	1013	19	F	Chinese	N			NA	Y	25	32		NA	NA	NA	0.571429	0.363636	0.435897	RDq16	RAv17	RDq16_2254.wav	0.867	491.5	1019.9	528.4	826.3	168.34	577	1016	0.8	0.922722	553.625	-58.209	0.000195551	1.63942	34.19	12.18	5.44	937.5	984.4
99	01_Dq16_Av17	510	Y	2	1	36	1	1	1	5198	30	M	English	Y	Rhesus macaque, Sooty mangabey	60	60	Y	NA	NA	asked for more clarification on "intense emotion" ~3 min into task	NA	NA	NA	0.511905	0.727273	0.717949	RDq16	RAv17	RDq16_2254.wav	0.867	491.5	1019.9	528.4	826.3	168.34	577	1016	0.8	0.922722	553.625	-58.209	0.000195551	1.63942	34.19	12.18	5.44	937.5	984.4
100	01_Dq16_Av17	108	N	2	2	22	1	0	2	421	19	M	English	N			NA	N	59	24		45	43	88	0.571429	0.393939	0.435897	RDq16	RAv17	RDq16_2254.wav	0.867	491.5	1019.9	528.4	826.3	168.34	577	1016	0.8	0.922722	553.625	-58.209	0.000195551	1.63942	34.19	12.18	5.44	937.5	984.4
101	01_Dq16_Av17	502	Y	2	1	35	1	1	1	1448	39	F	English	Y	Rhesus, pigrails, gorillas, orangutans, lemurs	216	204	Y	63	30		45	43	88	0.642857	0.909091	0.666667	RDq16	RAv17	RDq16_2254.wav	0.867	491.5	1019.9	528.4	826.3	168.34	577	1016	0.8	0.922722	553.625	-58.209	0.000195551	1.63942	34.19	12.18	5.44	937.5	984.4
102	01_Dq16_Av17	23	N	2	3	28	1	0	2	319	20	F	Mandarin	N			NA	N	38	33		NA	NA	NA	0.52381	0.575758	0.564103	RDq16	RAv17	RDq16_2254.wav	0.867	491.5	1019.9	528.4	826.3	168.34	577	1016	0.8	0.922722	553.625	-58.209	0.000195551	1.63942	34.19	12.18	5.44	937.5	984.4
103	01_Dq16_Av17	91	N	2	1	2	1	1	1	228	20	F	Chinese	N			NA	N	49	36		NA	NA	NA	0.547619	0.606061	0.641026	RDq16	RAv17	RDq16_2254.wav	0.867	491.5	1019.9	528.4	826.3	168.34	577	1016	0.8	0.922722	553.625	-58.209	0.000195551	1.63942	34.19	12.18	5.44	937.5	984.4
104	01_Dq16_Av17	98	N	2	4	38	1	1	1	1542	18	F	English	N			NA	Y	36	39		37	48	85	0.690476	0.393939	0.538462	RDq16	RAv17	RDq16_2254.wav	0.867	491.5	1019.9	528.4	826.3	168.34	577	1016	0.8	0.922722	553.625	-58.209	0.000195551	1.63942	34.19	12.18	5.44	937.5	984.4
105	01_Dq16_Av17	44	N	2	1	6	1	0	2	697	31	F	English	N			NA	Y	39	34		47	45	92	0.571429	0.606061	0.333333	RDq16	RAv17	RDq16_2254.wav	0.867	491.5	1019.9	528.4	826.3	168.34	577	1016	0.8	0.922722	553.625	-58.209	0.000195551	1.63942	34.19	12.18	5.44	937.5	984.4
106	01_Dq16_Av17	18	N	2	2	30	1	1	1	1011	20	F	English	N			NA	Y	44	35		32	42	74	0.571429	0.151515	0.333333	RDq16	RAv17	RDq16_2254.wav	0.867	491.5	1019.9	528.4	826.3	168.34	577	1016	0.8	0.922722	553.625	-58.209	0.000195551	1.63942	34.19	12.18	5.44	937.5	984.4
107	01_Dq16_Av17	81	N	2	4	16	1	0	2	438	18	F	English	N			NA	Y	53	33		43	51	94	0.690476	0.454545	0.538462	RDq16	RAv17	RDq16_2254.wav	0.867	491.5	1019.9	528.4	826.3	168.34	577	1016	0.8	0.922722	553.625	-58.209	0.000195551	1.63942	34.19	12.18	5.44	937.5	984.4
108	01_Dq16_Av17	94	N	2	2	2	1	1	1	241	20	F	English	N			NA	Y	45	44		40	44	84	0.72619	0.878788	0.410256	RDq16	RAv17	RDq16_2254.wav	0.867	491.5	1019.9	528.4	826.3	168.34	577	1016	0.8	0.922722	553.625	-58.209	0.000195551	1.63942	34.19	12.18	5.44	937.5	984.4
109	01_Dq16_Av17	73	N	2	1	3	1	1	1	351	19	F	English and Chinese	N			NA	Y	41	37		34	36	70	0.571429	0.575758	0.538462	RDq16	RAv17	RDq16_2254.wav	0.867	491.5	1019.9	528.4	826.3	168.34	577	1016	0.8	0.922722	553.625	-58.209	0.000195551	1.63942	34.19	12.18	5.44	937.5	984.4
110	01_Dq16_Av17	5	N	2	3	14	1	1	1	2758	29	F	English	Y	cat, dog, horse, cow	6+ years	NA	Y	41	35		46	49	95	0.583333	0.393939	0.564103	RDq16	RAv17	RDq16_2254.wav	0.867	491.5	1019.9	528.4	826.3	168.34	577	1016	0.8	0.922722	553.625	-58.209	0.000195551	1.63942	34.19	12.18	5.44	937.5	984.4
111	01_Dq16_Av17	46	N	2	3	26	1	0	2	274	18	F	English	N			NA	Y	45	25		39	42	81	0.619048	0.515152	0.589744	RDq16	RAv17	RDq16_2254.wav	0.867	491.5	1019.9	528.4	826.3	168.34	577	1016	0.8	0.922722	553.625	-58.209	0.000195551	1.63942	34.19	12.18	5.44	937.5	984.4
112	01_Dq16_Av17	25	N	2	3	10	1	0	2	459	21	M	English	N			NA	N	56	32		34	41	75	0.5	0.575758	0.461538	RDq16	RAv17	RDq16_2254.wav	0.867	491.5	1019.9	528.4	826.3	168.34	577	1016	0.8	0.922722	553.625	-58.209	0.000195551	1.63942	34.19	12.18	5.44	937.5	984.4
113	01_Dq16_Av17	43	N	2	3	31	1	1	1	225	19	M	English	N			NA	Y	37	39		36	40	76	0.595238	0.666667	0.589744	RDq16	RAv17	RDq16_2254.wav	0.867	491.5	1019.9	528.4	826.3	168.34	577	1016	0.8	0.922722	553.625	-58.209	0.000195551	1.63942	34.19	12.18	5.44	937.5	984.4
114	01_Dq16_Av17	505	Y	2	2	19	1	0	2	1391	30	F	English	Y	Rhesus macaque, horses, dogs, cats, birds, mangabey	120	94	Y	NA	NA		NA	NA	NA	0.595238	1	0.589744	RDq16	RAv17	RDq16_2254.wav	0.867	491.5	1019.9	528.4	826.3	168.34	577	1016	0.8	0.922722	553.625	-58.209	0.000195551	1.63942	34.19	12.18	5.44	937.5	984.4
115	01_Dq16_Av17	69	N	2	2	22	1	0	2	1318	20	F	English	N			NA	Y	40	37		42	43	85	0.547619	0.424242	0.615385	RDq16	RAv17	RDq16_2254.wav	0.867	491.5	1019.9	528.4	826.3	168.34	577	1016	0.8	0.922722	553.625	-58.209	0.000195551	1.63942	34.19	12.18	5.44	937.5	984.4
116	01_Dq16_Av17	104	N	2	1	17	1	0	2	468	19	F	Bangla	N			NA	N	49	31		NA	NA	NA	0.619048	0.363636	0.384615	RDq16	RAv17	RDq16_2254.wav	0.867	491.5	1019.9	528.4	826.3	168.34	577	1016	0.8	0.922722	553.625	-58.209	0.000195551	1.63942	34.19	12.18	5.44	937.5	984.4
117	01_Dq16_Av17	112	N	2	2	2	1	0	2	1099	18	M	Turkish	N			NA	Y	55	40		NA	NA	NA	0.535714	0.424242	0.461538	RDq16	RAv17	RDq16_2254.wav	0.867	491.5	1019.9	528.4	826.3	168.34	577	1016	0.8	0.922722	553.625	-58.209	0.000195551	1.63942	34.19	12.18	5.44	937.5	984.4
118	01_Dq16_Av17	59	N	2	1	18	1	1	1	195	18	M	Gujarati	N			NA	N	37	38		NA	NA	NA	0.52381	0.393939	0.666667	RDq16	RAv17	RDq16_2254.wav	0.867	491.5	1019.9	528.4	826.3	168.34	577	1016	0.8	0.922722	553.625	-58.209	0.000195551	1.63942	34.19	12.18	5.44	937.5	984.4
119	01_Dq16_Av17	93	N	2	1	10	1	0	2	303	19	F	English	N			NA	Y	53	37		38	38	76	0.52381	0.30303	0.487179	RDq16	RAv17	RDq16_2254.wav	0.867	491.5	1019.9	528.4	826.3	168.34	577	1016	0.8	0.922722	553.625	-58.209	0.000195551	1.63942	34.19	12.18	5.44	937.5	984.4
120	01_Dq16_Av17	54	N	2	1	42	1	1	1	487	18	F	Chinese	N			NA	N	35	41		NA	NA	NA	0.535714	0.424242	0.538462	RDq16	RAv17	RDq16_2254.wav	0.867	491.5	1019.9	528.4	826.3	168.34	577	1016	0.8	0.922722	553.625	-58.209	0.000195551	1.63942	34.19	12.18	5.44	937.5	984.4
121	01_Dq16_Av17	8	N	2	1	19	1	1	1	823	19	F	English	Y	dogs, cats	24	NA	Y	58	40		39	43	82	0.595238	0.363636	0.589744	RDq16	RAv17	RDq16_2254.wav	0.867	491.5	1019.9	528.4	826.3	168.34	577	1016	0.8	0.922722	553.625	-58.209	0.000195551	1.63942	34.19	12.18	5.44	937.5	984.4
122	01_Dq16_Av17	114	N	2	1	25	1	0	2	1059	19	M	English	N			NA	Y	58	35		36	38	74	0.607143	0.393939	0.512821	RDq16	RAv17	RDq16_2254.wav	0.867	491.5	1019.9	528.4	826.3	168.34	577	1016	0.8	0.922722	553.625	-58.209	0.000195551	1.63942	34.19	12.18	5.44	937.5	984.4
123	01_Dq16_Av17	34	N	2	3	16	1	1	1	259	24	M	Mandarin	N			NA	N	15	37		NA	NA	NA	0.511905	0.757576	0.282051	RDq16	RAv17	RDq16_2254.wav	0.867	491.5	1019.9	528.4	826.3	168.34	577	1016	0.8	0.922722	553.625	-58.209	0.000195551	1.63942	34.19	12.18	5.44	937.5	984.4
124	01_Dq16_Av17	107	N	2	4	5	1	0	2	217	22	F	Chinese	N			NA	N	21	37		NA	NA	NA	0.595238	0.424242	0.435897	RDq16	RAv17	RDq16_2254.wav	0.867	491.5	1019.9	528.4	826.3	168.34	577	1016	0.8	0.922722	553.625	-58.209	0.000195551	1.63942	34.19	12.18	5.44	937.5	984.4
125	01_Dq16_Av17	113	N	2	3	22	1	1	1	468	18	F	English	N			NA	Y	52	38		47	41	88	0.583333	0.848485	0.564103	RDq16	RAv17	RDq16_2254.wav	0.867	491.5	1019.9	528.4	826.3	168.34	577	1016	0.8	0.922722	553.625	-58.209	0.000195551	1.63942	34.19	12.18	5.44	937.5	984.4
126	02_Lq16_Dq16	11	N	2	4	25	2	1	2	1168	20	F	English (mainly) + Hindi	Y	dogs	6	NA	Y	66	45	noted w/ regard to coos that it is upsetting - sounds like they're in pain. Noted surpirse that screams would be more intense context than coos	34	41	75	0.666667	0.545455	0.641026	RDq16	RLq16	RLq16_2256.wav	0.341	660.1	760	99.9	682.2	23.65	661	682	0.11	0.322581	900	-337.662	8.93e-05	1.32106	16.25	13.31	2.05	703.1	1265.6
127	02_Lq16_Dq16	114	N	2	1	20	2	1	2	1644	19	M	English	N			NA	Y	58	35		36	38	74	0.607143	0.393939	0.512821	RDq16	RLq16	RLq16_2256.wav	0.341	660.1	760	99.9	682.2	23.65	661	682	0.11	0.322581	900	-337.662	8.93e-05	1.32106	16.25	13.31	2.05	703.1	1265.6
128	02_Lq16_Dq16	7	N	2	1	15	2	1	2	284	21	F	English	N			NA	Y	49	33		44	43	87	0.583333	0.363636	0.615385	RDq16	RLq16	RLq16_2256.wav	0.341	660.1	760	99.9	682.2	23.65	661	682	0.11	0.322581	900	-337.662	8.93e-05	1.32106	16.25	13.31	2.05	703.1	1265.6
129	02_Lq16_Dq16	9	N	2	1	7	2	1	2	391	19	M	English	Y	dogs, cats	3	NA	Y	41	31		35	32	67	0.416667	0.121212	0.435897	RDq16	RLq16	RLq16_2256.wav	0.341	660.1	760	99.9	682.2	23.65	661	682	0.11	0.322581	900	-337.662	8.93e-05	1.32106	16.25	13.31	2.05	703.1	1265.6
130	02_Lq16_Dq16	36	N	2	3	9	2	1	2	249	19	F	English	Y	dogs, cats	4	NA	Y	53	31		42	42	84	0.416667	0.606061	0.435897	RDq16	RLq16	RLq16_2256.wav	0.341	660.1	760	99.9	682.2	23.65	661	682	0.11	0.322581	900	-337.662	8.93e-05	1.32106	16.25	13.31	2.05	703.1	1265.6
131	02_Lq16_Dq16	109	N	2	3	34	2	1	2	213	20	F	English	N			NA	Y	41	33		45	43	88	0.666667	0.727273	0.384615	RDq16	RLq16	RLq16_2256.wav	0.341	660.1	760	99.9	682.2	23.65	661	682	0.11	0.322581	900	-337.662	8.93e-05	1.32106	16.25	13.31	2.05	703.1	1265.6
132	02_Lq16_Dq16	90	N	2	3	36	2	1	2	629	21	M	English	N			NA	N	43	24		42	42	84	0.52381	0.69697	0.641026	RDq16	RLq16	RLq16_2256.wav	0.341	660.1	760	99.9	682.2	23.65	661	682	0.11	0.322581	900	-337.662	8.93e-05	1.32106	16.25	13.31	2.05	703.1	1265.6
133	02_Lq16_Dq16	47	N	2	3	11	2	1	2	226	18	F	English	N			NA	Y	60	42		42	45	87	0.47619	0.30303	0.333333	RDq16	RLq16	RLq16_2256.wav	0.341	660.1	760	99.9	682.2	23.65	661	682	0.11	0.322581	900	-337.662	8.93e-05	1.32106	16.25	13.31	2.05	703.1	1265.6
134	02_Lq16_Dq16	67	N	2	3	34	2	1	2	134	18	F	English	N			NA	N	29	44		32	32	64	0.75	0.636364	0.564103	RDq16	RLq16	RLq16_2256.wav	0.341	660.1	760	99.9	682.2	23.65	661	682	0.11	0.322581	900	-337.662	8.93e-05	1.32106	16.25	13.31	2.05	703.1	1265.6
135	02_Lq16_Dq16	105	N	2	2	6	2	1	2	73	19	F	English	N			NA	Y	44	36		40	42	82	0.571429	0.606061	0.435897	RDq16	RLq16	RLq16_2256.wav	0.341	660.1	760	99.9	682.2	23.65	661	682	0.11	0.322581	900	-337.662	8.93e-05	1.32106	16.25	13.31	2.05	703.1	1265.6
136	02_Lq16_Dq16	20	Y	2	2	1	2	1	2	270	37	F	English	Y	Rhesus, chimpanzees, dogs, cats, mice, rats	180	132	Y	52	33		46	47	93	0.392857	0.454545	0.589744	RDq16	RLq16	RLq16_2256.wav	0.341	660.1	760	99.9	682.2	23.65	661	682	0.11	0.322581	900	-337.662	8.93e-05	1.32106	16.25	13.31	2.05	703.1	1265.6
137	02_Lq16_Dq16	74	N	2	4	37	2	1	2	302	19	F	English	Y	cats, dogs	1	NA	Y	47	41		41	43	84	0.428571	0.272727	0.538462	RDq16	RLq16	RLq16_2256.wav	0.341	660.1	760	99.9	682.2	23.65	661	682	0.11	0.322581	900	-337.662	8.93e-05	1.32106	16.25	13.31	2.05	703.1	1265.6
138	02_Lq16_Dq16	49	N	2	4	15	2	1	2	333	18	F	English	N			NA	N	44	28		42	2	44	0.642857	0.454545	0.487179	RDq16	RLq16	RLq16_2256.wav	0.341	660.1	760	99.9	682.2	23.65	661	682	0.11	0.322581	900	-337.662	8.93e-05	1.32106	16.25	13.31	2.05	703.1	1265.6
139	02_Lq16_Dq16	40	N	2	2	29	2	1	2	317	19	F	Chinese	N			NA	N	39	39		NA	NA	NA	0.666667	0.515152	0.512821	RDq16	RLq16	RLq16_2256.wav	0.341	660.1	760	99.9	682.2	23.65	661	682	0.11	0.322581	900	-337.662	8.93e-05	1.32106	16.25	13.31	2.05	703.1	1265.6
140	02_Lq16_Dq16	104	N	2	1	11	2	1	2	448	19	F	Bangla	N			NA	N	49	31		NA	NA	NA	0.619048	0.363636	0.384615	RDq16	RLq16	RLq16_2256.wav	0.341	660.1	760	99.9	682.2	23.65	661	682	0.11	0.322581	900	-337.662	8.93e-05	1.32106	16.25	13.31	2.05	703.1	1265.6
141	02_Lq16_Dq16	19	N	2	3	19	2	1	2	330	51	F	English	Y	mice	240	NA	Y	36	29		43	47	90	0.511905	0.575758	0.487179	RDq16	RLq16	RLq16_2256.wav	0.341	660.1	760	99.9	682.2	23.65	661	682	0.11	0.322581	900	-337.662	8.93e-05	1.32106	16.25	13.31	2.05	703.1	1265.6
142	02_Lq16_Dq16	512	Y	2	2	25	2	1	2	323	39	M	English	Y	Rhesus macaque, pigtail macaque, common chimpanzee, west lowland gorilla, Sooty mangabey	144	144	Y	NA	NA	occasionally needed to answer radio during task	NA	NA	NA	0.642857	1	0.589744	RDq16	RLq16	RLq16_2256.wav	0.341	660.1	760	99.9	682.2	23.65	661	682	0.11	0.322581	900	-337.662	8.93e-05	1.32106	16.25	13.31	2.05	703.1	1265.6
143	02_Lq16_Dq16	30	N	2	1	34	2	1	2	330	19	F	Chinese	N			NA	N	43	31		NA	NA	NA	0.535714	0.151515	0.641026	RDq16	RLq16	RLq16_2256.wav	0.341	660.1	760	99.9	682.2	23.65	661	682	0.11	0.322581	900	-337.662	8.93e-05	1.32106	16.25	13.31	2.05	703.1	1265.6
144	02_Lq16_Dq16	66	N	2	2	34	2	0	1	343	20	M	Chinese	N			NA	N	41	38		NA	NA	NA	0.47619	0.69697	0.512821	RDq16	RLq16	RLq16_2256.wav	0.341	660.1	760	99.9	682.2	23.65	661	682	0.11	0.322581	900	-337.662	8.93e-05	1.32106	16.25	13.31	2.05	703.1	1265.6
145	02_Lq16_Dq16	59	N	2	1	2	2	1	2	236	18	M	Gujarati	N			NA	N	37	38		NA	NA	NA	0.52381	0.393939	0.666667	RDq16	RLq16	RLq16_2256.wav	0.341	660.1	760	99.9	682.2	23.65	661	682	0.11	0.322581	900	-337.662	8.93e-05	1.32106	16.25	13.31	2.05	703.1	1265.6
146	02_Lq16_Dq16	73	N	2	1	12	2	1	2	203	19	F	English and Chinese	N			NA	Y	41	37		34	36	70	0.571429	0.575758	0.538462	RDq16	RLq16	RLq16_2256.wav	0.341	660.1	760	99.9	682.2	23.65	661	682	0.11	0.322581	900	-337.662	8.93e-05	1.32106	16.25	13.31	2.05	703.1	1265.6
147	02_Lq16_Dq16	103	N	2	4	32	2	1	2	198	19	F	Korean + English	Y	dogs, cats	3	NA	Y	47	39		40	41	81	0.52381	0.393939	0.512821	RDq16	RLq16	RLq16_2256.wav	0.341	660.1	760	99.9	682.2	23.65	661	682	0.11	0.322581	900	-337.662	8.93e-05	1.32106	16.25	13.31	2.05	703.1	1265.6
148	02_Lq16_Dq16	1	N	2	1	29	2	1	2	462	20	F	English	Y	cats, dogs	12	NA	Y	38	33		NA	40	NA	0.642857	0.333333	0.564103	RDq16	RLq16	RLq16_2256.wav	0.341	660.1	760	99.9	682.2	23.65	661	682	0.11	0.322581	900	-337.662	8.93e-05	1.32106	16.25	13.31	2.05	703.1	1265.6
149	02_Lq16_Dq16	508	Y	2	2	38	2	1	2	409	40	F	English	Y	Rhesus macaque, pigtail macaque, sooty mangabey	192	120	Y	NA	NA		NA	NA	NA	0.511905	0.969697	0.641026	RDq16	RLq16	RLq16_2256.wav	0.341	660.1	760	99.9	682.2	23.65	661	682	0.11	0.322581	900	-337.662	8.93e-05	1.32106	16.25	13.31	2.05	703.1	1265.6
150	02_Lq16_Dq16	17	N	2	2	27	2	1	2	1118	19	F	Chinese	N			NA	Y	49	34		NA	NA	NA	0.595238	1	0.487179	RDq16	RLq16	RLq16_2256.wav	0.341	660.1	760	99.9	682.2	23.65	661	682	0.11	0.322581	900	-337.662	8.93e-05	1.32106	16.25	13.31	2.05	703.1	1265.6
151	02_Lq16_Dq16	91	N	2	1	34	2	1	2	143	20	F	Chinese	N			NA	N	49	36		NA	NA	NA	0.547619	0.606061	0.641026	RDq16	RLq16	RLq16_2256.wav	0.341	660.1	760	99.9	682.2	23.65	661	682	0.11	0.322581	900	-337.662	8.93e-05	1.32106	16.25	13.31	2.05	703.1	1265.6
152	02_Lq16_Dq16	86	N	2	1	17	2	1	2	203	22	M	Chinese	N			NA	Y	44	35		NA	NA	NA	0.666667	0.515152	0.641026	RDq16	RLq16	RLq16_2256.wav	0.341	660.1	760	99.9	682.2	23.65	661	682	0.11	0.322581	900	-337.662	8.93e-05	1.32106	16.25	13.31	2.05	703.1	1265.6
153	02_Lq16_Dq16	69	N	2	2	17	2	1	2	458	20	F	English	N			NA	Y	40	37		42	43	85	0.547619	0.424242	0.615385	RDq16	RLq16	RLq16_2256.wav	0.341	660.1	760	99.9	682.2	23.65	661	682	0.11	0.322581	900	-337.662	8.93e-05	1.32106	16.25	13.31	2.05	703.1	1265.6
154	02_Lq16_Dq16	507	Y	2	1	25	2	1	2	54	27	F	English	Y	Rhesus macaque, tufted capuchins	60	48	Y	NA	NA		NA	NA	NA	0.547619	1	0.666667	RDq16	RLq16	RLq16_2256.wav	0.341	660.1	760	99.9	682.2	23.65	661	682	0.11	0.322581	900	-337.662	8.93e-05	1.32106	16.25	13.31	2.05	703.1	1265.6
155	02_Lq16_Dq16	102	N	2	1	6	2	1	2	372	18	F	English	Y	elephants, dogs, tortoises	3	NA	Y	46	44		33	36	69	0.559524	0.424242	0.461538	RDq16	RLq16	RLq16_2256.wav	0.341	660.1	760	99.9	682.2	23.65	661	682	0.11	0.322581	900	-337.662	8.93e-05	1.32106	16.25	13.31	2.05	703.1	1265.6
156	02_Lq16_Dq16	98	N	2	4	8	2	1	2	241	18	F	English	N			NA	Y	36	39		37	48	85	0.690476	0.393939	0.538462	RDq16	RLq16	RLq16_2256.wav	0.341	660.1	760	99.9	682.2	23.65	661	682	0.11	0.322581	900	-337.662	8.93e-05	1.32106	16.25	13.31	2.05	703.1	1265.6
157	02_Lq16_Dq16	111	N	2	3	12	2	1	2	235	21	F	English	N			NA	N	39	39		40	36	76	0.511905	0.575758	0.512821	RDq16	RLq16	RLq16_2256.wav	0.341	660.1	760	99.9	682.2	23.65	661	682	0.11	0.322581	900	-337.662	8.93e-05	1.32106	16.25	13.31	2.05	703.1	1265.6
158	02_Lq16_Dq16	10	N	2	3	28	2	0	1	1084	21	F	English	N			NA	Y	50	38		36	38	74	0.559524	0.757576	0.358974	RDq16	RLq16	RLq16_2256.wav	0.341	660.1	760	99.9	682.2	23.65	661	682	0.11	0.322581	900	-337.662	8.93e-05	1.32106	16.25	13.31	2.05	703.1	1265.6
159	02_Lq16_Dq16	63	N	2	4	16	2	1	2	699	19	F	English	N			NA	N	60	40		44	42	86	0.535714	0	0.717949	RDq16	RLq16	RLq16_2256.wav	0.341	660.1	760	99.9	682.2	23.65	661	682	0.11	0.322581	900	-337.662	8.93e-05	1.32106	16.25	13.31	2.05	703.1	1265.6
160	02_Lq16_Dq16	23	N	2	3	29	2	1	2	1066	20	F	Mandarin	N			NA	N	38	33		NA	NA	NA	0.52381	0.575758	0.564103	RDq16	RLq16	RLq16_2256.wav	0.341	660.1	760	99.9	682.2	23.65	661	682	0.11	0.322581	900	-337.662	8.93e-05	1.32106	16.25	13.31	2.05	703.1	1265.6
161	02_Lq16_Dq16	29	N	2	1	27	2	1	2	671	19	F	English	Y	dogs, cats	3	NA	Y	63	44		47	41	88	0.547619	0.454545	0.512821	RDq16	RLq16	RLq16_2256.wav	0.341	660.1	760	99.9	682.2	23.65	661	682	0.11	0.322581	900	-337.662	8.93e-05	1.32106	16.25	13.31	2.05	703.1	1265.6
162	02_Lq16_Dq16	96	N	2	1	23	2	1	2	340	18	F	English	N			NA	Y	59	39		44	47	91	0.583333	0.727273	0.512821	RDq16	RLq16	RLq16_2256.wav	0.341	660.1	760	99.9	682.2	23.65	661	682	0.11	0.322581	900	-337.662	8.93e-05	1.32106	16.25	13.31	2.05	703.1	1265.6
163	02_Lq16_Dq16	99	N	2	1	11	2	1	2	390	19	F	English + Hindi	N			NA	Y	56	37		37	39	76	0.595238	0.30303	0.461538	RDq16	RLq16	RLq16_2256.wav	0.341	660.1	760	99.9	682.2	23.65	661	682	0.11	0.322581	900	-337.662	8.93e-05	1.32106	16.25	13.31	2.05	703.1	1265.6
164	02_Lq16_Dq16	89	N	2	1	16	2	1	2	728	18	F	Spanish	N			NA	Y	50	37		NA	NA	NA	0.619048	0.818182	0.589744	RDq16	RLq16	RLq16_2256.wav	0.341	660.1	760	99.9	682.2	23.65	661	682	0.11	0.322581	900	-337.662	8.93e-05	1.32106	16.25	13.31	2.05	703.1	1265.6
165	02_Lq16_Dq16	37	N	2	2	36	2	1	2	537	19	F	Spanish	N			NA	Y	44	32		NA	NA	NA	0.52381	0.606061	0.641026	RDq16	RLq16	RLq16_2256.wav	0.341	660.1	760	99.9	682.2	23.65	661	682	0.11	0.322581	900	-337.662	8.93e-05	1.32106	16.25	13.31	2.05	703.1	1265.6
166	02_Lq16_Dq16	80	N	2	4	28	2	1	2	609	18	F	English	N			NA	Y	57	34		36	3	39	0.607143	0.545455	0.358974	RDq16	RLq16	RLq16_2256.wav	0.341	660.1	760	99.9	682.2	23.65	661	682	0.11	0.322581	900	-337.662	8.93e-05	1.32106	16.25	13.31	2.05	703.1	1265.6
167	02_Lq16_Dq16	56	N	2	2	21	2	1	2	181	18	F	Chinese	N			NA	Y	31	30		NA	NA	NA	0.595238	0.575758	0.384615	RDq16	RLq16	RLq16_2256.wav	0.341	660.1	760	99.9	682.2	23.65	661	682	0.11	0.322581	900	-337.662	8.93e-05	1.32106	16.25	13.31	2.05	703.1	1265.6
168	02_Lq16_Dq16	13	N	2	4	22	2	0	1	2207	19	F	English	N			NA	N	21	34		42	41	83	0.5	0.666667	0.487179	RDq16	RLq16	RLq16_2256.wav	0.341	660.1	760	99.9	682.2	23.65	661	682	0.11	0.322581	900	-337.662	8.93e-05	1.32106	16.25	13.31	2.05	703.1	1265.6
169	02_Lq16_Dq16	58	N	2	1	13	2	0	1	870	21	F	Spanish	Y	mice, rats	2	NA	Y	53	33		NA	NA	NA	0.547619	0.515152	0.461538	RDq16	RLq16	RLq16_2256.wav	0.341	660.1	760	99.9	682.2	23.65	661	682	0.11	0.322581	900	-337.662	8.93e-05	1.32106	16.25	13.31	2.05	703.1	1265.6
170	02_Lq16_Dq16	48	N	2	1	21	2	1	2	380	19	F	English	N			NA	Y	33	36		36	46	82	0.654762	0.606061	0.564103	RDq16	RLq16	RLq16_2256.wav	0.341	660.1	760	99.9	682.2	23.65	661	682	0.11	0.322581	900	-337.662	8.93e-05	1.32106	16.25	13.31	2.05	703.1	1265.6
171	02_Lq16_Dq16	505	Y	2	2	14	2	1	2	1268	30	F	English	Y	Rhesus macaque, horses, dogs, cats, birds, mangabey	120	94	Y	NA	NA		NA	NA	NA	0.595238	1	0.589744	RDq16	RLq16	RLq16_2256.wav	0.341	660.1	760	99.9	682.2	23.65	661	682	0.11	0.322581	900	-337.662	8.93e-05	1.32106	16.25	13.31	2.05	703.1	1265.6
172	02_Lq16_Dq16	88	N	2	1	34	2	1	2	192	19	M	Mandarin	N			NA	Y	49	27		NA	NA	NA	0.547619	0.818182	0.538462	RDq16	RLq16	RLq16_2256.wav	0.341	660.1	760	99.9	682.2	23.65	661	682	0.11	0.322581	900	-337.662	8.93e-05	1.32106	16.25	13.31	2.05	703.1	1265.6
173	02_Lq16_Dq16	5	N	2	3	30	2	1	2	44	29	F	English	Y	cat, dog, horse, cow	6+ years	NA	Y	41	35		46	49	95	0.583333	0.393939	0.564103	RDq16	RLq16	RLq16_2256.wav	0.341	660.1	760	99.9	682.2	23.65	661	682	0.11	0.322581	900	-337.662	8.93e-05	1.32106	16.25	13.31	2.05	703.1	1265.6
174	02_Lq16_Dq16	51	N	2	1	30	2	1	2	252	18	F	English	N			NA	Y	31	36		45	44	89	0.654762	0.515152	0.615385	RDq16	RLq16	RLq16_2256.wav	0.341	660.1	760	99.9	682.2	23.65	661	682	0.11	0.322581	900	-337.662	8.93e-05	1.32106	16.25	13.31	2.05	703.1	1265.6
175	02_Lq16_Dq16	79	N	2	1	39	2	1	2	324	21	M	English	N			NA	Y	55	38		33	34	67	0.571429	0.393939	0.564103	RDq16	RLq16	RLq16_2256.wav	0.341	660.1	760	99.9	682.2	23.65	661	682	0.11	0.322581	900	-337.662	8.93e-05	1.32106	16.25	13.31	2.05	703.1	1265.6
176	02_Lq16_Dq16	46	N	2	3	18	2	1	2	230	18	F	English	N			NA	Y	45	25		39	42	81	0.619048	0.515152	0.589744	RDq16	RLq16	RLq16_2256.wav	0.341	660.1	760	99.9	682.2	23.65	661	682	0.11	0.322581	900	-337.662	8.93e-05	1.32106	16.25	13.31	2.05	703.1	1265.6
177	02_Lq16_Dq16	83	N	2	3	17	2	1	2	471	19	F	English	N			NA	Y	55	46		48	46	94	0.5	0.333333	0.487179	RDq16	RLq16	RLq16_2256.wav	0.341	660.1	760	99.9	682.2	23.65	661	682	0.11	0.322581	900	-337.662	8.93e-05	1.32106	16.25	13.31	2.05	703.1	1265.6
178	02_Lq16_Dq16	106	N	2	4	41	2	1	2	252	18	F	Korean	N			NA	Y	53	39		NA	NA	NA	0.607143	0.606061	0.461538	RDq16	RLq16	RLq16_2256.wav	0.341	660.1	760	99.9	682.2	23.65	661	682	0.11	0.322581	900	-337.662	8.93e-05	1.32106	16.25	13.31	2.05	703.1	1265.6
179	02_Lq16_Dq16	26	N	2	1	22	2	1	2	250	24	M	Telugu	N			NA	N	41	35		NA	NA	NA	0.607143	0.515152	0.538462	RDq16	RLq16	RLq16_2256.wav	0.341	660.1	760	99.9	682.2	23.65	661	682	0.11	0.322581	900	-337.662	8.93e-05	1.32106	16.25	13.31	2.05	703.1	1265.6
180	02_Lq16_Dq16	75	N	2	2	40	2	1	2	499	19	M	Chinese	Y	fruitfly, termites	1.5	NA	N	58	38		NA	NA	NA	0.547619	0.484848	0.461538	RDq16	RLq16	RLq16_2256.wav	0.341	660.1	760	99.9	682.2	23.65	661	682	0.11	0.322581	900	-337.662	8.93e-05	1.32106	16.25	13.31	2.05	703.1	1265.6
181	02_Lq16_Dq16	16	N	2	1	31	2	1	2	350	21	F	English	Y	dogs, cats	6	NA	Y	44	43		38	40	78	0.559524	0.545455	0.461538	RDq16	RLq16	RLq16_2256.wav	0.341	660.1	760	99.9	682.2	23.65	661	682	0.11	0.322581	900	-337.662	8.93e-05	1.32106	16.25	13.31	2.05	703.1	1265.6
182	02_Lq16_Dq16	78	N	2	2	37	2	1	2	618	20	M	Spanish	Y	dogs, snakes	2	NA	Y	45	35		NA	NA	NA	0.547619	0.424242	0.487179	RDq16	RLq16	RLq16_2256.wav	0.341	660.1	760	99.9	682.2	23.65	661	682	0.11	0.322581	900	-337.662	8.93e-05	1.32106	16.25	13.31	2.05	703.1	1265.6
183	02_Lq16_Dq16	85	N	2	1	41	2	0	1	556	19	F	Chinese	N			NA	Y	25	32		NA	NA	NA	0.571429	0.363636	0.435897	RDq16	RLq16	RLq16_2256.wav	0.341	660.1	760	99.9	682.2	23.65	661	682	0.11	0.322581	900	-337.662	8.93e-05	1.32106	16.25	13.31	2.05	703.1	1265.6
184	02_Lq16_Dq16	4	N	2	3	37	2	0	1	259	20	M	English	N			NA	N	43	38		27	24	51	0.559524	0.424242	0.589744	RDq16	RLq16	RLq16_2256.wav	0.341	660.1	760	99.9	682.2	23.65	661	682	0.11	0.322581	900	-337.662	8.93e-05	1.32106	16.25	13.31	2.05	703.1	1265.6
185	02_Lq16_Dq16	110	N	2	1	29	2	1	2	472	19	M	English	N			NA	Y	40	32		35	38	73	0.511905	0.69697	0.564103	RDq16	RLq16	RLq16_2256.wav	0.341	660.1	760	99.9	682.2	23.65	661	682	0.11	0.322581	900	-337.662	8.93e-05	1.32106	16.25	13.31	2.05	703.1	1265.6
186	02_Lq16_Dq16	94	N	2	2	15	2	1	2	169	20	F	English	N			NA	Y	45	44		40	44	84	0.72619	0.878788	0.410256	RDq16	RLq16	RLq16_2256.wav	0.341	660.1	760	99.9	682.2	23.65	661	682	0.11	0.322581	900	-337.662	8.93e-05	1.32106	16.25	13.31	2.05	703.1	1265.6
187	02_Lq16_Dq16	44	N	2	1	33	2	1	2	618	31	F	English	N			NA	Y	39	34		47	45	92	0.571429	0.606061	0.333333	RDq16	RLq16	RLq16_2256.wav	0.341	660.1	760	99.9	682.2	23.65	661	682	0.11	0.322581	900	-337.662	8.93e-05	1.32106	16.25	13.31	2.05	703.1	1265.6
188	02_Lq16_Dq16	33	N	2	2	3	2	1	2	193	19	F	Mandarin + English	N			NA	Y	56	33		NA	NA	NA	0.571429	0.272727	0.615385	RDq16	RLq16	RLq16_2256.wav	0.341	660.1	760	99.9	682.2	23.65	661	682	0.11	0.322581	900	-337.662	8.93e-05	1.32106	16.25	13.31	2.05	703.1	1265.6
189	02_Lq16_Dq16	32	N	2	1	40	2	1	2	368	23	F	English	N			NA	N	58	26		34	33	67	0.559524	0.424242	0.435897	RDq16	RLq16	RLq16_2256.wav	0.341	660.1	760	99.9	682.2	23.65	661	682	0.11	0.322581	900	-337.662	8.93e-05	1.32106	16.25	13.31	2.05	703.1	1265.6
190	02_Lq16_Dq16	71	N	2	2	19	2	1	2	276	19	M	English	N			NA	Y	44	36		43	43	86	0.595238	0.424242	0.333333	RDq16	RLq16	RLq16_2256.wav	0.341	660.1	760	99.9	682.2	23.65	661	682	0.11	0.322581	900	-337.662	8.93e-05	1.32106	16.25	13.31	2.05	703.1	1265.6
191	02_Lq16_Dq16	100	N	2	3	8	2	1	2	374	21	F	Mandarin	N			NA	Y	50	36		NA	NA	NA	0.619048	0.424242	0.641026	RDq16	RLq16	RLq16_2256.wav	0.341	660.1	760	99.9	682.2	23.65	661	682	0.11	0.322581	900	-337.662	8.93e-05	1.32106	16.25	13.31	2.05	703.1	1265.6
192	02_Lq16_Dq16	15	N	2	4	17	2	1	2	1159	20	F	English and Chinese	N			NA	Y	58	36	didn't make it to face - just voice	NA	36	NA	0.488095	0.393939	0.461538	RDq16	RLq16	RLq16_2256.wav	0.341	660.1	760	99.9	682.2	23.65	661	682	0.11	0.322581	900	-337.662	8.93e-05	1.32106	16.25	13.31	2.05	703.1	1265.6
193	02_Lq16_Dq16	64	N	2	4	9	2	1	2	302	18	F	English	N			NA	N	55	36		40	42	82	0.654762	0.393939	0.666667	RDq16	RLq16	RLq16_2256.wav	0.341	660.1	760	99.9	682.2	23.65	661	682	0.11	0.322581	900	-337.662	8.93e-05	1.32106	16.25	13.31	2.05	703.1	1265.6
194	02_Lq16_Dq16	60	N	2	2	42	2	1	2	434	18	F	Chinese	N			NA	Y	54	33		NA	NA	NA	0.595238	0.69697	0.615385	RDq16	RLq16	RLq16_2256.wav	0.341	660.1	760	99.9	682.2	23.65	661	682	0.11	0.322581	900	-337.662	8.93e-05	1.32106	16.25	13.31	2.05	703.1	1265.6
195	02_Lq16_Dq16	93	N	2	1	19	2	1	2	443	19	F	English	N			NA	Y	53	37		38	38	76	0.52381	0.30303	0.487179	RDq16	RLq16	RLq16_2256.wav	0.341	660.1	760	99.9	682.2	23.65	661	682	0.11	0.322581	900	-337.662	8.93e-05	1.32106	16.25	13.31	2.05	703.1	1265.6
196	02_Lq16_Dq16	8	N	2	1	23	2	1	2	61	19	F	English	Y	dogs, cats	24	NA	Y	58	40		39	43	82	0.595238	0.363636	0.589744	RDq16	RLq16	RLq16_2256.wav	0.341	660.1	760	99.9	682.2	23.65	661	682	0.11	0.322581	900	-337.662	8.93e-05	1.32106	16.25	13.31	2.05	703.1	1265.6
197	02_Lq16_Dq16	53	N	2	1	42	2	1	2	182	18	F	English	N			NA	N	71	47		22	17	39	0.642857	0.787879	0.641026	RDq16	RLq16	RLq16_2256.wav	0.341	660.1	760	99.9	682.2	23.65	661	682	0.11	0.322581	900	-337.662	8.93e-05	1.32106	16.25	13.31	2.05	703.1	1265.6
198	02_Lq16_Dq16	38	N	2	4	18	2	1	2	293	18	F	English	N			NA	Y	57	36		41	41	82	0.619048	0.606061	0.615385	RDq16	RLq16	RLq16_2256.wav	0.341	660.1	760	99.9	682.2	23.65	661	682	0.11	0.322581	900	-337.662	8.93e-05	1.32106	16.25	13.31	2.05	703.1	1265.6
199	02_Lq16_Dq16	31	N	2	4	18	2	1	2	1233	18	F	English	N			NA	Y	47	35		38	40	78	0.583333	0.575758	0.384615	RDq16	RLq16	RLq16_2256.wav	0.341	660.1	760	99.9	682.2	23.65	661	682	0.11	0.322581	900	-337.662	8.93e-05	1.32106	16.25	13.31	2.05	703.1	1265.6
200	02_Lq16_Dq16	84	N	2	3	3	2	0	1	439	19	F	English	N			NA	Y	34	36		35	37	72	0.547619	0.575758	0.512821	RDq16	RLq16	RLq16_2256.wav	0.341	660.1	760	99.9	682.2	23.65	661	682	0.11	0.322581	900	-337.662	8.93e-05	1.32106	16.25	13.31	2.05	703.1	1265.6
201	02_Lq16_Dq16	22	N	2	1	42	2	1	2	606	31	F	English	Y	dogs, cats	6	NA	Y	56	49		47	46	93	0.452381	0.515152	0.692308	RDq16	RLq16	RLq16_2256.wav	0.341	660.1	760	99.9	682.2	23.65	661	682	0.11	0.322581	900	-337.662	8.93e-05	1.32106	16.25	13.31	2.05	703.1	1265.6
202	02_Lq16_Dq16	12	N	2	4	34	2	1	2	213	21	M	Chinese	N			NA	Y	41	34		NA	NA	NA	0.642857	0.484848	0.410256	RDq16	RLq16	RLq16_2256.wav	0.341	660.1	760	99.9	682.2	23.65	661	682	0.11	0.322581	900	-337.662	8.93e-05	1.32106	16.25	13.31	2.05	703.1	1265.6
203	02_Lq16_Dq16	21	N	2	1	34	2	1	2	311	20	F	English	Y	dogs	6	NA	Y	44	37		41	34	75	0.630952	0.787879	0.384615	RDq16	RLq16	RLq16_2256.wav	0.341	660.1	760	99.9	682.2	23.65	661	682	0.11	0.322581	900	-337.662	8.93e-05	1.32106	16.25	13.31	2.05	703.1	1265.6
204	02_Lq16_Dq16	50	N	2	4	9	2	0	1	383	19	F	English	Y	dogs, cats	12	NA	Y	53	40		24	19	43	0.5	0.212121	0.512821	RDq16	RLq16	RLq16_2256.wav	0.341	660.1	760	99.9	682.2	23.65	661	682	0.11	0.322581	900	-337.662	8.93e-05	1.32106	16.25	13.31	2.05	703.1	1265.6
205	02_Lq16_Dq16	509	Y	2	1	19	2	1	2	574	28	M	Spanish/English	Y	Rhesus macaque, mangabey	48	48	Y	NA	NA		NA	NA	NA	0.464286	0.969697	0.615385	RDq16	RLq16	RLq16_2256.wav	0.341	660.1	760	99.9	682.2	23.65	661	682	0.11	0.322581	900	-337.662	8.93e-05	1.32106	16.25	13.31	2.05	703.1	1265.6
206	02_Lq16_Dq16	35	N	2	1	37	2	1	2	467	19	M	English	N			NA	N	40	21		44	39	83	0.666667	0.818182	0.641026	RDq16	RLq16	RLq16_2256.wav	0.341	660.1	760	99.9	682.2	23.65	661	682	0.11	0.322581	900	-337.662	8.93e-05	1.32106	16.25	13.31	2.05	703.1	1265.6
207	02_Lq16_Dq16	39	N	2	3	25	2	1	2	2385	19	F	Spanish/English	N			NA	Y	55	38		41	43	84	0.583333	0.454545	0.538462	RDq16	RLq16	RLq16_2256.wav	0.341	660.1	760	99.9	682.2	23.65	661	682	0.11	0.322581	900	-337.662	8.93e-05	1.32106	16.25	13.31	2.05	703.1	1265.6
208	02_Lq16_Dq16	511	Y	2	1	14	2	1	2	1147	24	F	English	Y	Rhesus macaque, domestic cats	24	24	Y	NA	NA		NA	NA	NA	0.571429	0.69697	0.512821	RDq16	RLq16	RLq16_2256.wav	0.341	660.1	760	99.9	682.2	23.65	661	682	0.11	0.322581	900	-337.662	8.93e-05	1.32106	16.25	13.31	2.05	703.1	1265.6
209	02_Lq16_Dq16	2	N	2	3	1	2	1	2	393	19	F	English	N			NA	Y	49	42		36	37	73	0.595238	0.0606061	0.641026	RDq16	RLq16	RLq16_2256.wav	0.341	660.1	760	99.9	682.2	23.65	661	682	0.11	0.322581	900	-337.662	8.93e-05	1.32106	16.25	13.31	2.05	703.1	1265.6
210	02_Lq16_Dq16	76	N	2	4	29	2	1	2	71	19	F	Chinese	N			NA	Y	41	41		NA	NA	NA	0.630952	0.393939	0.538462	RDq16	RLq16	RLq16_2256.wav	0.341	660.1	760	99.9	682.2	23.65	661	682	0.11	0.322581	900	-337.662	8.93e-05	1.32106	16.25	13.31	2.05	703.1	1265.6
211	02_Lq16_Dq16	87	N	2	4	20	2	1	2	1128	19	F	Korean	N			NA	Y	53	41		NA	NA	NA	0.654762	0.787879	0.615385	RDq16	RLq16	RLq16_2256.wav	0.341	660.1	760	99.9	682.2	23.65	661	682	0.11	0.322581	900	-337.662	8.93e-05	1.32106	16.25	13.31	2.05	703.1	1265.6
212	02_Lq16_Dq16	61	N	2	4	28	2	1	2	242	19	M	English	N			NA	Y	42	36		43	35	78	0.619048	0.424242	0.461538	RDq16	RLq16	RLq16_2256.wav	0.341	660.1	760	99.9	682.2	23.65	661	682	0.11	0.322581	900	-337.662	8.93e-05	1.32106	16.25	13.31	2.05	703.1	1265.6
213	02_Lq16_Dq16	18	N	2	2	18	2	1	2	664	20	F	English	N			NA	Y	44	35		32	42	74	0.571429	0.151515	0.333333	RDq16	RLq16	RLq16_2256.wav	0.341	660.1	760	99.9	682.2	23.65	661	682	0.11	0.322581	900	-337.662	8.93e-05	1.32106	16.25	13.31	2.05	703.1	1265.6
214	02_Lq16_Dq16	24	N	2	2	9	2	0	1	333	20	M	English	N			NA	N	41	24		35	36	71	0.404762	0.363636	0.666667	RDq16	RLq16	RLq16_2256.wav	0.341	660.1	760	99.9	682.2	23.65	661	682	0.11	0.322581	900	-337.662	8.93e-05	1.32106	16.25	13.31	2.05	703.1	1265.6
215	02_Lq16_Dq16	115	N	2	4	41	2	0	1	666	18	M	Mandarin	N			NA	N	31	37		NA	NA	NA	0.583333	0.575758	0.461538	RDq16	RLq16	RLq16_2256.wav	0.341	660.1	760	99.9	682.2	23.65	661	682	0.11	0.322581	900	-337.662	8.93e-05	1.32106	16.25	13.31	2.05	703.1	1265.6
216	02_Lq16_Dq16	97	N	2	4	23	2	1	2	284	19	F	English	N			NA	Y	48	28		40	43	83	0.595238	0.606061	0.487179	RDq16	RLq16	RLq16_2256.wav	0.341	660.1	760	99.9	682.2	23.65	661	682	0.11	0.322581	900	-337.662	8.93e-05	1.32106	16.25	13.31	2.05	703.1	1265.6
217	02_Lq16_Dq16	112	N	2	2	9	2	1	2	238	18	M	Turkish	N			NA	Y	55	40		NA	NA	NA	0.535714	0.424242	0.461538	RDq16	RLq16	RLq16_2256.wav	0.341	660.1	760	99.9	682.2	23.65	661	682	0.11	0.322581	900	-337.662	8.93e-05	1.32106	16.25	13.31	2.05	703.1	1265.6
218	02_Lq16_Dq16	43	N	2	3	17	2	1	2	191	19	M	English	N			NA	Y	37	39		36	40	76	0.595238	0.666667	0.589744	RDq16	RLq16	RLq16_2256.wav	0.341	660.1	760	99.9	682.2	23.65	661	682	0.11	0.322581	900	-337.662	8.93e-05	1.32106	16.25	13.31	2.05	703.1	1265.6
219	02_Lq16_Dq16	6	N	2	1	1	2	1	2	178	23	M	English	Y	mice	3	NA	Y	31	28		38	41	79	0.595238	0.484848	0.589744	RDq16	RLq16	RLq16_2256.wav	0.341	660.1	760	99.9	682.2	23.65	661	682	0.11	0.322581	900	-337.662	8.93e-05	1.32106	16.25	13.31	2.05	703.1	1265.6
220	02_Lq16_Dq16	81	N	2	4	21	2	1	2	181	18	F	English	N			NA	Y	53	33		43	51	94	0.690476	0.454545	0.538462	RDq16	RLq16	RLq16_2256.wav	0.341	660.1	760	99.9	682.2	23.65	661	682	0.11	0.322581	900	-337.662	8.93e-05	1.32106	16.25	13.31	2.05	703.1	1265.6
221	02_Lq16_Dq16	82	N	2	2	3	2	1	2	230	18	F	Korean	Y	dogs, cats	3	NA	Y	31	40		NA	NA	NA	0.559524	0.333333	0.641026	RDq16	RLq16	RLq16_2256.wav	0.341	660.1	760	99.9	682.2	23.65	661	682	0.11	0.322581	900	-337.662	8.93e-05	1.32106	16.25	13.31	2.05	703.1	1265.6
222	02_Lq16_Dq16	62	N	2	4	30	2	1	2	217	18	F	English	Y	mice	1	NA	Y	59	32		46	40	86	0.559524	0.484848	0.538462	RDq16	RLq16	RLq16_2256.wav	0.341	660.1	760	99.9	682.2	23.65	661	682	0.11	0.322581	900	-337.662	8.93e-05	1.32106	16.25	13.31	2.05	703.1	1265.6
223	02_Lq16_Dq16	54	N	2	1	12	2	1	2	961	18	F	Chinese	N			NA	N	35	41		NA	NA	NA	0.535714	0.424242	0.538462	RDq16	RLq16	RLq16_2256.wav	0.341	660.1	760	99.9	682.2	23.65	661	682	0.11	0.322581	900	-337.662	8.93e-05	1.32106	16.25	13.31	2.05	703.1	1265.6
224	02_Lq16_Dq16	101	N	2	4	34	2	1	2	234	19	F	English	Y	mice	11	NA	Y	50	40		43	43	86	0.690476	0.484848	0.487179	RDq16	RLq16	RLq16_2256.wav	0.341	660.1	760	99.9	682.2	23.65	661	682	0.11	0.322581	900	-337.662	8.93e-05	1.32106	16.25	13.31	2.05	703.1	1265.6
225	02_Lq16_Dq16	510	Y	2	1	42	2	1	2	2372	30	M	English	Y	Rhesus macaque, Sooty mangabey	60	60	Y	NA	NA	asked for more clarification on "intense emotion" ~3 min into task	NA	NA	NA	0.511905	0.727273	0.717949	RDq16	RLq16	RLq16_2256.wav	0.341	660.1	760	99.9	682.2	23.65	661	682	0.11	0.322581	900	-337.662	8.93e-05	1.32106	16.25	13.31	2.05	703.1	1265.6
226	02_Lq16_Dq16	55	N	2	4	39	2	1	2	206	18	F	Mandarin	N			NA	Y	64	30		NA	NA	NA	0.690476	0.515152	0.410256	RDq16	RLq16	RLq16_2256.wav	0.341	660.1	760	99.9	682.2	23.65	661	682	0.11	0.322581	900	-337.662	8.93e-05	1.32106	16.25	13.31	2.05	703.1	1265.6
227	02_Lq16_Dq16	3	N	2	2	39	2	1	2	1672	28	M	English	N			NA	Y	39	30		45	42	87	0.559524	0.575758	0.487179	RDq16	RLq16	RLq16_2256.wav	0.341	660.1	760	99.9	682.2	23.65	661	682	0.11	0.322581	900	-337.662	8.93e-05	1.32106	16.25	13.31	2.05	703.1	1265.6
228	02_Lq16_Dq16	107	N	2	4	36	2	1	2	657	22	F	Chinese	N			NA	N	21	37		NA	NA	NA	0.595238	0.424242	0.435897	RDq16	RLq16	RLq16_2256.wav	0.341	660.1	760	99.9	682.2	23.65	661	682	0.11	0.322581	900	-337.662	8.93e-05	1.32106	16.25	13.31	2.05	703.1	1265.6
229	02_Lq16_Dq16	65	N	2	2	12	2	0	1	737	20	F	Arabic	Y			NA	N	36	35		NA	NA	NA	0.559524	0.363636	0.564103	RDq16	RLq16	RLq16_2256.wav	0.341	660.1	760	99.9	682.2	23.65	661	682	0.11	0.322581	900	-337.662	8.93e-05	1.32106	16.25	13.31	2.05	703.1	1265.6
230	02_Lq16_Dq16	108	N	2	2	6	2	1	2	230	19	M	English	N			NA	N	59	24		45	43	88	0.571429	0.393939	0.435897	RDq16	RLq16	RLq16_2256.wav	0.341	660.1	760	99.9	682.2	23.65	661	682	0.11	0.322581	900	-337.662	8.93e-05	1.32106	16.25	13.31	2.05	703.1	1265.6
231	02_Lq16_Dq16	506	Y	2	2	24	2	1	2	636	37	F	English	Y	Rhesus macaque	120	120	Y	NA	NA		NA	NA	NA	0.559524	0.424242	0.487179	RDq16	RLq16	RLq16_2256.wav	0.341	660.1	760	99.9	682.2	23.65	661	682	0.11	0.322581	900	-337.662	8.93e-05	1.32106	16.25	13.31	2.05	703.1	1265.6
232	02_Lq16_Dq16	57	N	2	4	15	2	1	2	449	20	F	English	N			NA	N	29	31		27	41	68	0.547619	0.333333	0.538462	RDq16	RLq16	RLq16_2256.wav	0.341	660.1	760	99.9	682.2	23.65	661	682	0.11	0.322581	900	-337.662	8.93e-05	1.32106	16.25	13.31	2.05	703.1	1265.6
233	02_Lq16_Dq16	77	N	2	3	17	2	1	2	95	19	M	Chinese	N			NA	Y	46	18		NA	NA	NA	0.595238	0.454545	0.538462	RDq16	RLq16	RLq16_2256.wav	0.341	660.1	760	99.9	682.2	23.65	661	682	0.11	0.322581	900	-337.662	8.93e-05	1.32106	16.25	13.31	2.05	703.1	1265.6
234	02_Lq16_Dq16	68	N	2	2	40	2	1	2	107	19	M	Spanish	N			NA	N	48	NA	didn't fill out this questionnaire animal	NA	NA	NA	0.607143	0.333333	0.641026	RDq16	RLq16	RLq16_2256.wav	0.341	660.1	760	99.9	682.2	23.65	661	682	0.11	0.322581	900	-337.662	8.93e-05	1.32106	16.25	13.31	2.05	703.1	1265.6
235	02_Lq16_Dq16	113	N	2	3	37	2	0	1	2209	18	F	English	N			NA	Y	52	38		47	41	88	0.583333	0.848485	0.564103	RDq16	RLq16	RLq16_2256.wav	0.341	660.1	760	99.9	682.2	23.65	661	682	0.11	0.322581	900	-337.662	8.93e-05	1.32106	16.25	13.31	2.05	703.1	1265.6
236	02_Lq16_Dq16	72	N	2	3	34	2	1	2	558	19	F	English	N			NA	Y	48	33		35	31	66	0.511905	0.69697	0.538462	RDq16	RLq16	RLq16_2256.wav	0.341	660.1	760	99.9	682.2	23.65	661	682	0.11	0.322581	900	-337.662	8.93e-05	1.32106	16.25	13.31	2.05	703.1	1265.6
237	02_Lq16_Dq16	501	Y	2	4	12	2	1	2	292	26	M	English	Y	lemurs (black white ruffed, ringtail, red bellied, crown, mongoose), Rhesus monkeys, gorillas, orangutans	Lemur: 24, Rh: 48, Gorilla: 12, Orangutan: 12	48	Y	47	37		46	44	90	0.559524	0.69697	0.461538	RDq16	RLq16	RLq16_2256.wav	0.341	660.1	760	99.9	682.2	23.65	661	682	0.11	0.322581	900	-337.662	8.93e-05	1.32106	16.25	13.31	2.05	703.1	1265.6
238	02_Lq16_Dq16	502	Y	2	1	14	2	1	2	2406	39	F	English	Y	Rhesus, pigrails, gorillas, orangutans, lemurs	216	204	Y	63	30		45	43	88	0.642857	0.909091	0.666667	RDq16	RLq16	RLq16_2256.wav	0.341	660.1	760	99.9	682.2	23.65	661	682	0.11	0.322581	900	-337.662	8.93e-05	1.32106	16.25	13.31	2.05	703.1	1265.6
239	02_Lq16_Dq16	52	N	2	2	9	2	1	2	275	19	F	English	N			NA	Y	55	38		42	43	85	0.619048	0.393939	0.512821	RDq16	RLq16	RLq16_2256.wav	0.341	660.1	760	99.9	682.2	23.65	661	682	0.11	0.322581	900	-337.662	8.93e-05	1.32106	16.25	13.31	2.05	703.1	1265.6
240	02_Lq16_Dq16	513	Y	2	1	36	2	1	2	798	53	F	English	Y	chimps, bonobos, Rhesus macaque, Sooty mangabeys, pigtail macaque, gibbons, orangutan, stumptail macaques, baboons	288	288	Y	NA	NA		NA	NA	NA	0.535714	0.969697	0.589744	RDq16	RLq16	RLq16_2256.wav	0.341	660.1	760	99.9	682.2	23.65	661	682	0.11	0.322581	900	-337.662	8.93e-05	1.32106	16.25	13.31	2.05	703.1	1265.6
241	02_Lq16_Dq16	92	N	2	2	15	2	1	2	1899	18	F	English	N			NA	Y	45	30		36	36	72	0.595238	0.212121	0.589744	RDq16	RLq16	RLq16_2256.wav	0.341	660.1	760	99.9	682.2	23.65	661	682	0.11	0.322581	900	-337.662	8.93e-05	1.32106	16.25	13.31	2.05	703.1	1265.6
242	02_Lq16_Dq16	70	N	2	3	3	2	1	2	187	18	F	English	N			NA	Y	62	34		48	45	93	0.52381	0.242424	0.384615	RDq16	RLq16	RLq16_2256.wav	0.341	660.1	760	99.9	682.2	23.65	661	682	0.11	0.322581	900	-337.662	8.93e-05	1.32106	16.25	13.31	2.05	703.1	1265.6
243	02_Lq16_Dq16	34	N	2	3	18	2	0	1	243	24	M	Mandarin	N			NA	N	15	37		NA	NA	NA	0.511905	0.757576	0.282051	RDq16	RLq16	RLq16_2256.wav	0.341	660.1	760	99.9	682.2	23.65	661	682	0.11	0.322581	900	-337.662	8.93e-05	1.32106	16.25	13.31	2.05	703.1	1265.6
244	02_Lq16_Dq16	14	N	2	1	4	2	1	2	260	19	M	English and Mandarin	N			NA	N	43	35		32	39	71	0.642857	0.818182	0.615385	RDq16	RLq16	RLq16_2256.wav	0.341	660.1	760	99.9	682.2	23.65	661	682	0.11	0.322581	900	-337.662	8.93e-05	1.32106	16.25	13.31	2.05	703.1	1265.6
245	02_Lq16_Dq16	42	N	2	2	38	2	1	2	233	19	F	English	N			NA	N	35	28		44	44	88	0.571429	0.454545	0.692308	RDq16	RLq16	RLq16_2256.wav	0.341	660.1	760	99.9	682.2	23.65	661	682	0.11	0.322581	900	-337.662	8.93e-05	1.32106	16.25	13.31	2.05	703.1	1265.6
246	02_Lq16_Dq16	25	N	2	3	13	2	0	1	2312	21	M	English	N			NA	N	56	32		34	41	75	0.5	0.575758	0.461538	RDq16	RLq16	RLq16_2256.wav	0.341	660.1	760	99.9	682.2	23.65	661	682	0.11	0.322581	900	-337.662	8.93e-05	1.32106	16.25	13.31	2.05	703.1	1265.6
247	02_Lq16_Dq16	27	N	2	4	9	2	1	2	278	23	F	Telugu	N			NA	N	32	44		NA	NA	NA	0.547619	0.151515	0.512821	RDq16	RLq16	RLq16_2256.wav	0.341	660.1	760	99.9	682.2	23.65	661	682	0.11	0.322581	900	-337.662	8.93e-05	1.32106	16.25	13.31	2.05	703.1	1265.6
248	02_Lq16_Dq16	95	N	2	2	6	2	1	2	360	20	F	English	N			NA	Y	57	30		39	44	83	0.571429	0.363636	0.564103	RDq16	RLq16	RLq16_2256.wav	0.341	660.1	760	99.9	682.2	23.65	661	682	0.11	0.322581	900	-337.662	8.93e-05	1.32106	16.25	13.31	2.05	703.1	1265.6
249	02_Lq16_Dq16	41	N	2	4	41	2	1	2	287	20	M	Vietnamese	N			NA	Y	45	29		NA	NA	NA	0.630952	0.454545	0.435897	RDq16	RLq16	RLq16_2256.wav	0.341	660.1	760	99.9	682.2	23.65	661	682	0.11	0.322581	900	-337.662	8.93e-05	1.32106	16.25	13.31	2.05	703.1	1265.6
250	02_Lq16_Dq16	28	N	2	2	40	2	1	2	18	40	F	English	N			NA	Y	50	33		42	NA	NA	0.630952	0.606061	0.564103	RDq16	RLq16	RLq16_2256.wav	0.341	660.1	760	99.9	682.2	23.65	661	682	0.11	0.322581	900	-337.662	8.93e-05	1.32106	16.25	13.31	2.05	703.1	1265.6
251	03_Dq16_Sr17	113	N	2	3	35	1	1	1	4649	18	F	English	N			NA	Y	52	38		47	41	88	0.583333	0.848485	0.564103	RDq16	RSr17	RDq16_2254.wav	0.867	491.5	1019.9	528.4	826.3	168.34	577	1016	0.8	0.922722	553.625	-58.209	0.000195551	1.63942	34.19	12.18	5.44	937.5	984.4
252	03_Dq16_Sr17	107	N	2	4	21	1	0	2	3767	22	F	Chinese	N			NA	N	21	37		NA	NA	NA	0.595238	0.424242	0.435897	RDq16	RSr17	RDq16_2254.wav	0.867	491.5	1019.9	528.4	826.3	168.34	577	1016	0.8	0.922722	553.625	-58.209	0.000195551	1.63942	34.19	12.18	5.44	937.5	984.4
253	03_Dq16_Sr17	55	N	2	4	12	1	0	2	245	18	F	Mandarin	N			NA	Y	64	30		NA	NA	NA	0.690476	0.515152	0.410256	RDq16	RSr17	RDq16_2254.wav	0.867	491.5	1019.9	528.4	826.3	168.34	577	1016	0.8	0.922722	553.625	-58.209	0.000195551	1.63942	34.19	12.18	5.44	937.5	984.4
254	03_Dq16_Sr17	47	N	2	3	31	1	0	2	255	18	F	English	N			NA	Y	60	42		42	45	87	0.47619	0.30303	0.333333	RDq16	RSr17	RDq16_2254.wav	0.867	491.5	1019.9	528.4	826.3	168.34	577	1016	0.8	0.922722	553.625	-58.209	0.000195551	1.63942	34.19	12.18	5.44	937.5	984.4
255	03_Dq16_Sr17	27	N	2	4	37	1	0	2	469	23	F	Telugu	N			NA	N	32	44		NA	NA	NA	0.547619	0.151515	0.512821	RDq16	RSr17	RDq16_2254.wav	0.867	491.5	1019.9	528.4	826.3	168.34	577	1016	0.8	0.922722	553.625	-58.209	0.000195551	1.63942	34.19	12.18	5.44	937.5	984.4
256	03_Dq16_Sr17	31	N	2	4	38	1	1	1	498	18	F	English	N			NA	Y	47	35		38	40	78	0.583333	0.575758	0.384615	RDq16	RSr17	RDq16_2254.wav	0.867	491.5	1019.9	528.4	826.3	168.34	577	1016	0.8	0.922722	553.625	-58.209	0.000195551	1.63942	34.19	12.18	5.44	937.5	984.4
257	03_Dq16_Sr17	84	N	2	3	42	1	0	2	510	19	F	English	N			NA	Y	34	36		35	37	72	0.547619	0.575758	0.512821	RDq16	RSr17	RDq16_2254.wav	0.867	491.5	1019.9	528.4	826.3	168.34	577	1016	0.8	0.922722	553.625	-58.209	0.000195551	1.63942	34.19	12.18	5.44	937.5	984.4
258	03_Dq16_Sr17	86	N	2	1	19	1	0	2	351	22	M	Chinese	N			NA	Y	44	35		NA	NA	NA	0.666667	0.515152	0.641026	RDq16	RSr17	RDq16_2254.wav	0.867	491.5	1019.9	528.4	826.3	168.34	577	1016	0.8	0.922722	553.625	-58.209	0.000195551	1.63942	34.19	12.18	5.44	937.5	984.4
259	03_Dq16_Sr17	83	N	2	3	36	1	1	1	216	19	F	English	N			NA	Y	55	46		48	46	94	0.5	0.333333	0.487179	RDq16	RSr17	RDq16_2254.wav	0.867	491.5	1019.9	528.4	826.3	168.34	577	1016	0.8	0.922722	553.625	-58.209	0.000195551	1.63942	34.19	12.18	5.44	937.5	984.4
260	03_Dq16_Sr17	43	N	2	3	6	1	1	1	154	19	M	English	N			NA	Y	37	39		36	40	76	0.595238	0.666667	0.589744	RDq16	RSr17	RDq16_2254.wav	0.867	491.5	1019.9	528.4	826.3	168.34	577	1016	0.8	0.922722	553.625	-58.209	0.000195551	1.63942	34.19	12.18	5.44	937.5	984.4
261	03_Dq16_Sr17	93	N	2	1	20	1	0	2	419	19	F	English	N			NA	Y	53	37		38	38	76	0.52381	0.30303	0.487179	RDq16	RSr17	RDq16_2254.wav	0.867	491.5	1019.9	528.4	826.3	168.34	577	1016	0.8	0.922722	553.625	-58.209	0.000195551	1.63942	34.19	12.18	5.44	937.5	984.4
262	03_Dq16_Sr17	73	N	2	1	13	1	1	1	465	19	F	English and Chinese	N			NA	Y	41	37		34	36	70	0.571429	0.575758	0.538462	RDq16	RSr17	RDq16_2254.wav	0.867	491.5	1019.9	528.4	826.3	168.34	577	1016	0.8	0.922722	553.625	-58.209	0.000195551	1.63942	34.19	12.18	5.44	937.5	984.4
263	03_Dq16_Sr17	19	N	2	3	27	1	0	2	432	51	F	English	Y	mice	240	NA	Y	36	29		43	47	90	0.511905	0.575758	0.487179	RDq16	RSr17	RDq16_2254.wav	0.867	491.5	1019.9	528.4	826.3	168.34	577	1016	0.8	0.922722	553.625	-58.209	0.000195551	1.63942	34.19	12.18	5.44	937.5	984.4
264	03_Dq16_Sr17	509	Y	2	1	2	1	0	2	238	28	M	Spanish/English	Y	Rhesus macaque, mangabey	48	48	Y	NA	NA		NA	NA	NA	0.464286	0.969697	0.615385	RDq16	RSr17	RDq16_2254.wav	0.867	491.5	1019.9	528.4	826.3	168.34	577	1016	0.8	0.922722	553.625	-58.209	0.000195551	1.63942	34.19	12.18	5.44	937.5	984.4
265	03_Dq16_Sr17	105	N	2	2	1	1	1	1	802	19	F	English	N			NA	Y	44	36		40	42	82	0.571429	0.606061	0.435897	RDq16	RSr17	RDq16_2254.wav	0.867	491.5	1019.9	528.4	826.3	168.34	577	1016	0.8	0.922722	553.625	-58.209	0.000195551	1.63942	34.19	12.18	5.44	937.5	984.4
266	03_Dq16_Sr17	66	N	2	2	4	1	0	2	3448	20	M	Chinese	N			NA	N	41	38		NA	NA	NA	0.47619	0.69697	0.512821	RDq16	RSr17	RDq16_2254.wav	0.867	491.5	1019.9	528.4	826.3	168.34	577	1016	0.8	0.922722	553.625	-58.209	0.000195551	1.63942	34.19	12.18	5.44	937.5	984.4
267	03_Dq16_Sr17	63	N	2	4	8	1	0	2	1568	19	F	English	N			NA	N	60	40		44	42	86	0.535714	0	0.717949	RDq16	RSr17	RDq16_2254.wav	0.867	491.5	1019.9	528.4	826.3	168.34	577	1016	0.8	0.922722	553.625	-58.209	0.000195551	1.63942	34.19	12.18	5.44	937.5	984.4
268	03_Dq16_Sr17	114	N	2	1	3	1	1	1	1783	19	M	English	N			NA	Y	58	35		36	38	74	0.607143	0.393939	0.512821	RDq16	RSr17	RDq16_2254.wav	0.867	491.5	1019.9	528.4	826.3	168.34	577	1016	0.8	0.922722	553.625	-58.209	0.000195551	1.63942	34.19	12.18	5.44	937.5	984.4
269	03_Dq16_Sr17	13	N	2	4	19	1	0	2	810	19	F	English	N			NA	N	21	34		42	41	83	0.5	0.666667	0.487179	RDq16	RSr17	RDq16_2254.wav	0.867	491.5	1019.9	528.4	826.3	168.34	577	1016	0.8	0.922722	553.625	-58.209	0.000195551	1.63942	34.19	12.18	5.44	937.5	984.4
270	03_Dq16_Sr17	10	N	2	3	21	1	1	1	1035	21	F	English	N			NA	Y	50	38		36	38	74	0.559524	0.757576	0.358974	RDq16	RSr17	RDq16_2254.wav	0.867	491.5	1019.9	528.4	826.3	168.34	577	1016	0.8	0.922722	553.625	-58.209	0.000195551	1.63942	34.19	12.18	5.44	937.5	984.4
271	03_Dq16_Sr17	32	N	2	1	20	1	0	2	1230	23	F	English	N			NA	N	58	26		34	33	67	0.559524	0.424242	0.435897	RDq16	RSr17	RDq16_2254.wav	0.867	491.5	1019.9	528.4	826.3	168.34	577	1016	0.8	0.922722	553.625	-58.209	0.000195551	1.63942	34.19	12.18	5.44	937.5	984.4
272	03_Dq16_Sr17	51	N	2	1	32	1	0	2	534	18	F	English	N			NA	Y	31	36		45	44	89	0.654762	0.515152	0.615385	RDq16	RSr17	RDq16_2254.wav	0.867	491.5	1019.9	528.4	826.3	168.34	577	1016	0.8	0.922722	553.625	-58.209	0.000195551	1.63942	34.19	12.18	5.44	937.5	984.4
273	03_Dq16_Sr17	103	N	2	4	42	1	1	1	245	19	F	Korean + English	Y	dogs, cats	3	NA	Y	47	39		40	41	81	0.52381	0.393939	0.512821	RDq16	RSr17	RDq16_2254.wav	0.867	491.5	1019.9	528.4	826.3	168.34	577	1016	0.8	0.922722	553.625	-58.209	0.000195551	1.63942	34.19	12.18	5.44	937.5	984.4
274	03_Dq16_Sr17	53	N	2	1	17	1	0	2	779	18	F	English	N			NA	N	71	47		22	17	39	0.642857	0.787879	0.641026	RDq16	RSr17	RDq16_2254.wav	0.867	491.5	1019.9	528.4	826.3	168.34	577	1016	0.8	0.922722	553.625	-58.209	0.000195551	1.63942	34.19	12.18	5.44	937.5	984.4
275	03_Dq16_Sr17	61	N	2	4	8	1	0	2	568	19	M	English	N			NA	Y	42	36		43	35	78	0.619048	0.424242	0.461538	RDq16	RSr17	RDq16_2254.wav	0.867	491.5	1019.9	528.4	826.3	168.34	577	1016	0.8	0.922722	553.625	-58.209	0.000195551	1.63942	34.19	12.18	5.44	937.5	984.4
276	03_Dq16_Sr17	12	N	2	4	20	1	1	1	258	21	M	Chinese	N			NA	Y	41	34		NA	NA	NA	0.642857	0.484848	0.410256	RDq16	RSr17	RDq16_2254.wav	0.867	491.5	1019.9	528.4	826.3	168.34	577	1016	0.8	0.922722	553.625	-58.209	0.000195551	1.63942	34.19	12.18	5.44	937.5	984.4
277	03_Dq16_Sr17	98	N	2	4	7	1	1	1	505	18	F	English	N			NA	Y	36	39		37	48	85	0.690476	0.393939	0.538462	RDq16	RSr17	RDq16_2254.wav	0.867	491.5	1019.9	528.4	826.3	168.34	577	1016	0.8	0.922722	553.625	-58.209	0.000195551	1.63942	34.19	12.18	5.44	937.5	984.4
278	03_Dq16_Sr17	87	N	2	4	30	1	0	2	1939	19	F	Korean	N			NA	Y	53	41		NA	NA	NA	0.654762	0.787879	0.615385	RDq16	RSr17	RDq16_2254.wav	0.867	491.5	1019.9	528.4	826.3	168.34	577	1016	0.8	0.922722	553.625	-58.209	0.000195551	1.63942	34.19	12.18	5.44	937.5	984.4
279	03_Dq16_Sr17	99	N	2	1	18	1	1	1	857	19	F	English + Hindi	N			NA	Y	56	37		37	39	76	0.595238	0.30303	0.461538	RDq16	RSr17	RDq16_2254.wav	0.867	491.5	1019.9	528.4	826.3	168.34	577	1016	0.8	0.922722	553.625	-58.209	0.000195551	1.63942	34.19	12.18	5.44	937.5	984.4
280	03_Dq16_Sr17	59	N	2	1	38	1	1	1	223	18	M	Gujarati	N			NA	N	37	38		NA	NA	NA	0.52381	0.393939	0.666667	RDq16	RSr17	RDq16_2254.wav	0.867	491.5	1019.9	528.4	826.3	168.34	577	1016	0.8	0.922722	553.625	-58.209	0.000195551	1.63942	34.19	12.18	5.44	937.5	984.4
281	03_Dq16_Sr17	70	N	2	3	11	1	0	2	1821	18	F	English	N			NA	Y	62	34		48	45	93	0.52381	0.242424	0.384615	RDq16	RSr17	RDq16_2254.wav	0.867	491.5	1019.9	528.4	826.3	168.34	577	1016	0.8	0.922722	553.625	-58.209	0.000195551	1.63942	34.19	12.18	5.44	937.5	984.4
282	03_Dq16_Sr17	14	N	2	1	33	1	1	1	1902	19	M	English and Mandarin	N			NA	N	43	35		32	39	71	0.642857	0.818182	0.615385	RDq16	RSr17	RDq16_2254.wav	0.867	491.5	1019.9	528.4	826.3	168.34	577	1016	0.8	0.922722	553.625	-58.209	0.000195551	1.63942	34.19	12.18	5.44	937.5	984.4
283	03_Dq16_Sr17	39	N	2	3	42	1	1	1	214	19	F	Spanish/English	N			NA	Y	55	38		41	43	84	0.583333	0.454545	0.538462	RDq16	RSr17	RDq16_2254.wav	0.867	491.5	1019.9	528.4	826.3	168.34	577	1016	0.8	0.922722	553.625	-58.209	0.000195551	1.63942	34.19	12.18	5.44	937.5	984.4
284	03_Dq16_Sr17	508	Y	2	2	1	1	0	2	2879	40	F	English	Y	Rhesus macaque, pigtail macaque, sooty mangabey	192	120	Y	NA	NA		NA	NA	NA	0.511905	0.969697	0.641026	RDq16	RSr17	RDq16_2254.wav	0.867	491.5	1019.9	528.4	826.3	168.34	577	1016	0.8	0.922722	553.625	-58.209	0.000195551	1.63942	34.19	12.18	5.44	937.5	984.4
285	03_Dq16_Sr17	29	N	2	1	29	1	0	2	953	19	F	English	Y	dogs, cats	3	NA	Y	63	44		47	41	88	0.547619	0.454545	0.512821	RDq16	RSr17	RDq16_2254.wav	0.867	491.5	1019.9	528.4	826.3	168.34	577	1016	0.8	0.922722	553.625	-58.209	0.000195551	1.63942	34.19	12.18	5.44	937.5	984.4
286	03_Dq16_Sr17	17	N	2	2	29	1	0	2	574	19	F	Chinese	N			NA	Y	49	34		NA	NA	NA	0.595238	1	0.487179	RDq16	RSr17	RDq16_2254.wav	0.867	491.5	1019.9	528.4	826.3	168.34	577	1016	0.8	0.922722	553.625	-58.209	0.000195551	1.63942	34.19	12.18	5.44	937.5	984.4
287	03_Dq16_Sr17	34	N	2	3	3	1	0	2	337	24	M	Mandarin	N			NA	N	15	37		NA	NA	NA	0.511905	0.757576	0.282051	RDq16	RSr17	RDq16_2254.wav	0.867	491.5	1019.9	528.4	826.3	168.34	577	1016	0.8	0.922722	553.625	-58.209	0.000195551	1.63942	34.19	12.18	5.44	937.5	984.4
288	03_Dq16_Sr17	3	N	2	2	30	1	1	1	206	28	M	English	N			NA	Y	39	30		45	42	87	0.559524	0.575758	0.487179	RDq16	RSr17	RDq16_2254.wav	0.867	491.5	1019.9	528.4	826.3	168.34	577	1016	0.8	0.922722	553.625	-58.209	0.000195551	1.63942	34.19	12.18	5.44	937.5	984.4
289	03_Dq16_Sr17	4	N	2	3	25	1	0	2	36	20	M	English	N			NA	N	43	38		27	24	51	0.559524	0.424242	0.589744	RDq16	RSr17	RDq16_2254.wav	0.867	491.5	1019.9	528.4	826.3	168.34	577	1016	0.8	0.922722	553.625	-58.209	0.000195551	1.63942	34.19	12.18	5.44	937.5	984.4
290	03_Dq16_Sr17	5	N	2	3	41	1	1	1	335	29	F	English	Y	cat, dog, horse, cow	6+ years	NA	Y	41	35		46	49	95	0.583333	0.393939	0.564103	RDq16	RSr17	RDq16_2254.wav	0.867	491.5	1019.9	528.4	826.3	168.34	577	1016	0.8	0.922722	553.625	-58.209	0.000195551	1.63942	34.19	12.18	5.44	937.5	984.4
291	03_Dq16_Sr17	101	N	2	4	9	1	0	2	1471	19	F	English	Y	mice	11	NA	Y	50	40		43	43	86	0.690476	0.484848	0.487179	RDq16	RSr17	RDq16_2254.wav	0.867	491.5	1019.9	528.4	826.3	168.34	577	1016	0.8	0.922722	553.625	-58.209	0.000195551	1.63942	34.19	12.18	5.44	937.5	984.4
292	03_Dq16_Sr17	102	N	2	1	40	1	0	2	340	18	F	English	Y	elephants, dogs, tortoises	3	NA	Y	46	44		33	36	69	0.559524	0.424242	0.461538	RDq16	RSr17	RDq16_2254.wav	0.867	491.5	1019.9	528.4	826.3	168.34	577	1016	0.8	0.922722	553.625	-58.209	0.000195551	1.63942	34.19	12.18	5.44	937.5	984.4
293	03_Dq16_Sr17	81	N	2	4	18	1	1	1	555	18	F	English	N			NA	Y	53	33		43	51	94	0.690476	0.454545	0.538462	RDq16	RSr17	RDq16_2254.wav	0.867	491.5	1019.9	528.4	826.3	168.34	577	1016	0.8	0.922722	553.625	-58.209	0.000195551	1.63942	34.19	12.18	5.44	937.5	984.4
294	03_Dq16_Sr17	108	N	2	2	15	1	0	2	218	19	M	English	N			NA	N	59	24		45	43	88	0.571429	0.393939	0.435897	RDq16	RSr17	RDq16_2254.wav	0.867	491.5	1019.9	528.4	826.3	168.34	577	1016	0.8	0.922722	553.625	-58.209	0.000195551	1.63942	34.19	12.18	5.44	937.5	984.4
295	03_Dq16_Sr17	57	N	2	4	7	1	1	1	334	20	F	English	N			NA	N	29	31		27	41	68	0.547619	0.333333	0.538462	RDq16	RSr17	RDq16_2254.wav	0.867	491.5	1019.9	528.4	826.3	168.34	577	1016	0.8	0.922722	553.625	-58.209	0.000195551	1.63942	34.19	12.18	5.44	937.5	984.4
296	03_Dq16_Sr17	21	N	2	1	21	1	1	1	570	20	F	English	Y	dogs	6	NA	Y	44	37		41	34	75	0.630952	0.787879	0.384615	RDq16	RSr17	RDq16_2254.wav	0.867	491.5	1019.9	528.4	826.3	168.34	577	1016	0.8	0.922722	553.625	-58.209	0.000195551	1.63942	34.19	12.18	5.44	937.5	984.4
297	03_Dq16_Sr17	77	N	2	3	35	1	0	2	520	19	M	Chinese	N			NA	Y	46	18		NA	NA	NA	0.595238	0.454545	0.538462	RDq16	RSr17	RDq16_2254.wav	0.867	491.5	1019.9	528.4	826.3	168.34	577	1016	0.8	0.922722	553.625	-58.209	0.000195551	1.63942	34.19	12.18	5.44	937.5	984.4
298	03_Dq16_Sr17	11	N	2	4	33	1	1	1	3502	20	F	English (mainly) + Hindi	Y	dogs	6	NA	Y	66	45	noted w/ regard to coos that it is upsetting - sounds like they're in pain. Noted surpirse that screams would be more intense context than coos	34	41	75	0.666667	0.545455	0.641026	RDq16	RSr17	RDq16_2254.wav	0.867	491.5	1019.9	528.4	826.3	168.34	577	1016	0.8	0.922722	553.625	-58.209	0.000195551	1.63942	34.19	12.18	5.44	937.5	984.4
299	03_Dq16_Sr17	80	N	2	4	12	1	0	2	1738	18	F	English	N			NA	Y	57	34		36	3	39	0.607143	0.545455	0.358974	RDq16	RSr17	RDq16_2254.wav	0.867	491.5	1019.9	528.4	826.3	168.34	577	1016	0.8	0.922722	553.625	-58.209	0.000195551	1.63942	34.19	12.18	5.44	937.5	984.4
300	03_Dq16_Sr17	33	N	2	2	34	1	1	1	473	19	F	Mandarin + English	N			NA	Y	56	33		NA	NA	NA	0.571429	0.272727	0.615385	RDq16	RSr17	RDq16_2254.wav	0.867	491.5	1019.9	528.4	826.3	168.34	577	1016	0.8	0.922722	553.625	-58.209	0.000195551	1.63942	34.19	12.18	5.44	937.5	984.4
301	03_Dq16_Sr17	68	N	2	2	24	1	0	2	2937	19	M	Spanish	N			NA	N	48	NA	didn't fill out this questionnaire animal	NA	NA	NA	0.607143	0.333333	0.641026	RDq16	RSr17	RDq16_2254.wav	0.867	491.5	1019.9	528.4	826.3	168.34	577	1016	0.8	0.922722	553.625	-58.209	0.000195551	1.63942	34.19	12.18	5.44	937.5	984.4
302	03_Dq16_Sr17	24	N	2	2	39	1	1	1	260	20	M	English	N			NA	N	41	24		35	36	71	0.404762	0.363636	0.666667	RDq16	RSr17	RDq16_2254.wav	0.867	491.5	1019.9	528.4	826.3	168.34	577	1016	0.8	0.922722	553.625	-58.209	0.000195551	1.63942	34.19	12.18	5.44	937.5	984.4
303	03_Dq16_Sr17	62	N	2	4	28	1	0	2	258	18	F	English	Y	mice	1	NA	Y	59	32		46	40	86	0.559524	0.484848	0.538462	RDq16	RSr17	RDq16_2254.wav	0.867	491.5	1019.9	528.4	826.3	168.34	577	1016	0.8	0.922722	553.625	-58.209	0.000195551	1.63942	34.19	12.18	5.44	937.5	984.4
304	03_Dq16_Sr17	88	N	2	1	8	1	0	2	333	19	M	Mandarin	N			NA	Y	49	27		NA	NA	NA	0.547619	0.818182	0.538462	RDq16	RSr17	RDq16_2254.wav	0.867	491.5	1019.9	528.4	826.3	168.34	577	1016	0.8	0.922722	553.625	-58.209	0.000195551	1.63942	34.19	12.18	5.44	937.5	984.4
305	03_Dq16_Sr17	8	N	2	1	39	1	1	1	448	19	F	English	Y	dogs, cats	24	NA	Y	58	40		39	43	82	0.595238	0.363636	0.589744	RDq16	RSr17	RDq16_2254.wav	0.867	491.5	1019.9	528.4	826.3	168.34	577	1016	0.8	0.922722	553.625	-58.209	0.000195551	1.63942	34.19	12.18	5.44	937.5	984.4
306	03_Dq16_Sr17	28	N	2	2	23	1	1	1	153	40	F	English	N			NA	Y	50	33		42	NA	NA	0.630952	0.606061	0.564103	RDq16	RSr17	RDq16_2254.wav	0.867	491.5	1019.9	528.4	826.3	168.34	577	1016	0.8	0.922722	553.625	-58.209	0.000195551	1.63942	34.19	12.18	5.44	937.5	984.4
307	03_Dq16_Sr17	110	N	2	1	1	1	0	2	903	19	M	English	N			NA	Y	40	32		35	38	73	0.511905	0.69697	0.564103	RDq16	RSr17	RDq16_2254.wav	0.867	491.5	1019.9	528.4	826.3	168.34	577	1016	0.8	0.922722	553.625	-58.209	0.000195551	1.63942	34.19	12.18	5.44	937.5	984.4
308	03_Dq16_Sr17	69	N	2	2	41	1	0	2	1000	20	F	English	N			NA	Y	40	37		42	43	85	0.547619	0.424242	0.615385	RDq16	RSr17	RDq16_2254.wav	0.867	491.5	1019.9	528.4	826.3	168.34	577	1016	0.8	0.922722	553.625	-58.209	0.000195551	1.63942	34.19	12.18	5.44	937.5	984.4
309	03_Dq16_Sr17	60	N	2	2	4	1	0	2	8	18	F	Chinese	N			NA	Y	54	33		NA	NA	NA	0.595238	0.69697	0.615385	RDq16	RSr17	RDq16_2254.wav	0.867	491.5	1019.9	528.4	826.3	168.34	577	1016	0.8	0.922722	553.625	-58.209	0.000195551	1.63942	34.19	12.18	5.44	937.5	984.4
310	03_Dq16_Sr17	58	N	2	1	26	1	0	2	739	21	F	Spanish	Y	mice, rats	2	NA	Y	53	33		NA	NA	NA	0.547619	0.515152	0.461538	RDq16	RSr17	RDq16_2254.wav	0.867	491.5	1019.9	528.4	826.3	168.34	577	1016	0.8	0.922722	553.625	-58.209	0.000195551	1.63942	34.19	12.18	5.44	937.5	984.4
311	03_Dq16_Sr17	41	N	2	4	32	1	1	1	219	20	M	Vietnamese	N			NA	Y	45	29		NA	NA	NA	0.630952	0.454545	0.435897	RDq16	RSr17	RDq16_2254.wav	0.867	491.5	1019.9	528.4	826.3	168.34	577	1016	0.8	0.922722	553.625	-58.209	0.000195551	1.63942	34.19	12.18	5.44	937.5	984.4
312	03_Dq16_Sr17	506	Y	2	2	32	1	0	2	1245	37	F	English	Y	Rhesus macaque	120	120	Y	NA	NA		NA	NA	NA	0.559524	0.424242	0.487179	RDq16	RSr17	RDq16_2254.wav	0.867	491.5	1019.9	528.4	826.3	168.34	577	1016	0.8	0.922722	553.625	-58.209	0.000195551	1.63942	34.19	12.18	5.44	937.5	984.4
313	03_Dq16_Sr17	513	Y	2	1	12	1	0	2	385	53	F	English	Y	chimps, bonobos, Rhesus macaque, Sooty mangabeys, pigtail macaque, gibbons, orangutan, stumptail macaques, baboons	288	288	Y	NA	NA		NA	NA	NA	0.535714	0.969697	0.589744	RDq16	RSr17	RDq16_2254.wav	0.867	491.5	1019.9	528.4	826.3	168.34	577	1016	0.8	0.922722	553.625	-58.209	0.000195551	1.63942	34.19	12.18	5.44	937.5	984.4
314	03_Dq16_Sr17	1	N	2	1	7	1	0	2	544	20	F	English	Y	cats, dogs	12	NA	Y	38	33		NA	40	NA	0.642857	0.333333	0.564103	RDq16	RSr17	RDq16_2254.wav	0.867	491.5	1019.9	528.4	826.3	168.34	577	1016	0.8	0.922722	553.625	-58.209	0.000195551	1.63942	34.19	12.18	5.44	937.5	984.4
315	03_Dq16_Sr17	100	N	2	3	1	1	0	2	736	21	F	Mandarin	N			NA	Y	50	36		NA	NA	NA	0.619048	0.424242	0.641026	RDq16	RSr17	RDq16_2254.wav	0.867	491.5	1019.9	528.4	826.3	168.34	577	1016	0.8	0.922722	553.625	-58.209	0.000195551	1.63942	34.19	12.18	5.44	937.5	984.4
316	03_Dq16_Sr17	67	N	2	3	37	1	1	1	338	18	F	English	N			NA	N	29	44		32	32	64	0.75	0.636364	0.564103	RDq16	RSr17	RDq16_2254.wav	0.867	491.5	1019.9	528.4	826.3	168.34	577	1016	0.8	0.922722	553.625	-58.209	0.000195551	1.63942	34.19	12.18	5.44	937.5	984.4
317	03_Dq16_Sr17	89	N	2	1	7	1	1	1	629	18	F	Spanish	N			NA	Y	50	37		NA	NA	NA	0.619048	0.818182	0.589744	RDq16	RSr17	RDq16_2254.wav	0.867	491.5	1019.9	528.4	826.3	168.34	577	1016	0.8	0.922722	553.625	-58.209	0.000195551	1.63942	34.19	12.18	5.44	937.5	984.4
318	03_Dq16_Sr17	82	N	2	2	15	1	1	1	509	18	F	Korean	Y	dogs, cats	3	NA	Y	31	40		NA	NA	NA	0.559524	0.333333	0.641026	RDq16	RSr17	RDq16_2254.wav	0.867	491.5	1019.9	528.4	826.3	168.34	577	1016	0.8	0.922722	553.625	-58.209	0.000195551	1.63942	34.19	12.18	5.44	937.5	984.4
319	03_Dq16_Sr17	9	N	2	1	31	1	1	1	341	19	M	English	Y	dogs, cats	3	NA	Y	41	31		35	32	67	0.416667	0.121212	0.435897	RDq16	RSr17	RDq16_2254.wav	0.867	491.5	1019.9	528.4	826.3	168.34	577	1016	0.8	0.922722	553.625	-58.209	0.000195551	1.63942	34.19	12.18	5.44	937.5	984.4
320	03_Dq16_Sr17	97	N	2	4	5	1	0	2	412	19	F	English	N			NA	Y	48	28		40	43	83	0.595238	0.606061	0.487179	RDq16	RSr17	RDq16_2254.wav	0.867	491.5	1019.9	528.4	826.3	168.34	577	1016	0.8	0.922722	553.625	-58.209	0.000195551	1.63942	34.19	12.18	5.44	937.5	984.4
321	03_Dq16_Sr17	115	N	2	4	38	1	0	2	258	18	M	Mandarin	N			NA	N	31	37		NA	NA	NA	0.583333	0.575758	0.461538	RDq16	RSr17	RDq16_2254.wav	0.867	491.5	1019.9	528.4	826.3	168.34	577	1016	0.8	0.922722	553.625	-58.209	0.000195551	1.63942	34.19	12.18	5.44	937.5	984.4
322	03_Dq16_Sr17	48	N	2	1	12	1	1	1	184	19	F	English	N			NA	Y	33	36		36	46	82	0.654762	0.606061	0.564103	RDq16	RSr17	RDq16_2254.wav	0.867	491.5	1019.9	528.4	826.3	168.34	577	1016	0.8	0.922722	553.625	-58.209	0.000195551	1.63942	34.19	12.18	5.44	937.5	984.4
323	03_Dq16_Sr17	7	N	2	1	29	1	0	2	1759	21	F	English	N			NA	Y	49	33		44	43	87	0.583333	0.363636	0.615385	RDq16	RSr17	RDq16_2254.wav	0.867	491.5	1019.9	528.4	826.3	168.34	577	1016	0.8	0.922722	553.625	-58.209	0.000195551	1.63942	34.19	12.18	5.44	937.5	984.4
324	03_Dq16_Sr17	111	N	2	3	38	1	1	1	322	21	F	English	N			NA	N	39	39		40	36	76	0.511905	0.575758	0.512821	RDq16	RSr17	RDq16_2254.wav	0.867	491.5	1019.9	528.4	826.3	168.34	577	1016	0.8	0.922722	553.625	-58.209	0.000195551	1.63942	34.19	12.18	5.44	937.5	984.4
325	03_Dq16_Sr17	502	Y	2	1	9	1	0	2	774	39	F	English	Y	Rhesus, pigrails, gorillas, orangutans, lemurs	216	204	Y	63	30		45	43	88	0.642857	0.909091	0.666667	RDq16	RSr17	RDq16_2254.wav	0.867	491.5	1019.9	528.4	826.3	168.34	577	1016	0.8	0.922722	553.625	-58.209	0.000195551	1.63942	34.19	12.18	5.44	937.5	984.4
326	03_Dq16_Sr17	71	N	2	2	24	1	1	1	916	19	M	English	N			NA	Y	44	36		43	43	86	0.595238	0.424242	0.333333	RDq16	RSr17	RDq16_2254.wav	0.867	491.5	1019.9	528.4	826.3	168.34	577	1016	0.8	0.922722	553.625	-58.209	0.000195551	1.63942	34.19	12.18	5.44	937.5	984.4
327	03_Dq16_Sr17	109	N	2	3	22	1	0	2	242	20	F	English	N			NA	Y	41	33		45	43	88	0.666667	0.727273	0.384615	RDq16	RSr17	RDq16_2254.wav	0.867	491.5	1019.9	528.4	826.3	168.34	577	1016	0.8	0.922722	553.625	-58.209	0.000195551	1.63942	34.19	12.18	5.44	937.5	984.4
328	03_Dq16_Sr17	501	Y	2	4	32	1	0	2	516	26	M	English	Y	lemurs (black white ruffed, ringtail, red bellied, crown, mongoose), Rhesus monkeys, gorillas, orangutans	Lemur: 24, Rh: 48, Gorilla: 12, Orangutan: 12	48	Y	47	37		46	44	90	0.559524	0.69697	0.461538	RDq16	RSr17	RDq16_2254.wav	0.867	491.5	1019.9	528.4	826.3	168.34	577	1016	0.8	0.922722	553.625	-58.209	0.000195551	1.63942	34.19	12.18	5.44	937.5	984.4
329	03_Dq16_Sr17	37	N	2	2	39	1	0	2	239	19	F	Spanish	N			NA	Y	44	32		NA	NA	NA	0.52381	0.606061	0.641026	RDq16	RSr17	RDq16_2254.wav	0.867	491.5	1019.9	528.4	826.3	168.34	577	1016	0.8	0.922722	553.625	-58.209	0.000195551	1.63942	34.19	12.18	5.44	937.5	984.4
330	03_Dq16_Sr17	512	Y	2	2	27	1	1	1	653	39	M	English	Y	Rhesus macaque, pigtail macaque, common chimpanzee, west lowland gorilla, Sooty mangabey	144	144	Y	NA	NA	occasionally needed to answer radio during task	NA	NA	NA	0.642857	1	0.589744	RDq16	RSr17	RDq16_2254.wav	0.867	491.5	1019.9	528.4	826.3	168.34	577	1016	0.8	0.922722	553.625	-58.209	0.000195551	1.63942	34.19	12.18	5.44	937.5	984.4
331	03_Dq16_Sr17	15	N	2	4	20	1	0	2	1538	20	F	English and Chinese	N			NA	Y	58	36	didn't make it to face - just voice	NA	36	NA	0.488095	0.393939	0.461538	RDq16	RSr17	RDq16_2254.wav	0.867	491.5	1019.9	528.4	826.3	168.34	577	1016	0.8	0.922722	553.625	-58.209	0.000195551	1.63942	34.19	12.18	5.44	937.5	984.4
332	03_Dq16_Sr17	76	N	2	4	2	1	0	2	408	19	F	Chinese	N			NA	Y	41	41		NA	NA	NA	0.630952	0.393939	0.538462	RDq16	RSr17	RDq16_2254.wav	0.867	491.5	1019.9	528.4	826.3	168.34	577	1016	0.8	0.922722	553.625	-58.209	0.000195551	1.63942	34.19	12.18	5.44	937.5	984.4
333	03_Dq16_Sr17	42	N	2	2	20	1	1	1	162	19	F	English	N			NA	N	35	28		44	44	88	0.571429	0.454545	0.692308	RDq16	RSr17	RDq16_2254.wav	0.867	491.5	1019.9	528.4	826.3	168.34	577	1016	0.8	0.922722	553.625	-58.209	0.000195551	1.63942	34.19	12.18	5.44	937.5	984.4
334	03_Dq16_Sr17	94	N	2	2	18	1	1	1	284	20	F	English	N			NA	Y	45	44		40	44	84	0.72619	0.878788	0.410256	RDq16	RSr17	RDq16_2254.wav	0.867	491.5	1019.9	528.4	826.3	168.34	577	1016	0.8	0.922722	553.625	-58.209	0.000195551	1.63942	34.19	12.18	5.44	937.5	984.4
335	03_Dq16_Sr17	91	N	2	1	17	1	1	1	10	20	F	Chinese	N			NA	N	49	36		NA	NA	NA	0.547619	0.606061	0.641026	RDq16	RSr17	RDq16_2254.wav	0.867	491.5	1019.9	528.4	826.3	168.34	577	1016	0.8	0.922722	553.625	-58.209	0.000195551	1.63942	34.19	12.18	5.44	937.5	984.4
336	03_Dq16_Sr17	49	N	2	4	30	1	0	2	443	18	F	English	N			NA	N	44	28		42	2	44	0.642857	0.454545	0.487179	RDq16	RSr17	RDq16_2254.wav	0.867	491.5	1019.9	528.4	826.3	168.34	577	1016	0.8	0.922722	553.625	-58.209	0.000195551	1.63942	34.19	12.18	5.44	937.5	984.4
337	03_Dq16_Sr17	30	N	2	1	13	1	0	2	937	19	F	Chinese	N			NA	N	43	31		NA	NA	NA	0.535714	0.151515	0.641026	RDq16	RSr17	RDq16_2254.wav	0.867	491.5	1019.9	528.4	826.3	168.34	577	1016	0.8	0.922722	553.625	-58.209	0.000195551	1.63942	34.19	12.18	5.44	937.5	984.4
338	03_Dq16_Sr17	20	Y	2	2	5	1	1	1	535	37	F	English	Y	Rhesus, chimpanzees, dogs, cats, mice, rats	180	132	Y	52	33		46	47	93	0.392857	0.454545	0.589744	RDq16	RSr17	RDq16_2254.wav	0.867	491.5	1019.9	528.4	826.3	168.34	577	1016	0.8	0.922722	553.625	-58.209	0.000195551	1.63942	34.19	12.18	5.44	937.5	984.4
339	03_Dq16_Sr17	511	Y	2	1	39	1	1	1	377	24	F	English	Y	Rhesus macaque, domestic cats	24	24	Y	NA	NA		NA	NA	NA	0.571429	0.69697	0.512821	RDq16	RSr17	RDq16_2254.wav	0.867	491.5	1019.9	528.4	826.3	168.34	577	1016	0.8	0.922722	553.625	-58.209	0.000195551	1.63942	34.19	12.18	5.44	937.5	984.4
340	03_Dq16_Sr17	64	N	2	4	2	1	1	1	584	18	F	English	N			NA	N	55	36		40	42	82	0.654762	0.393939	0.666667	RDq16	RSr17	RDq16_2254.wav	0.867	491.5	1019.9	528.4	826.3	168.34	577	1016	0.8	0.922722	553.625	-58.209	0.000195551	1.63942	34.19	12.18	5.44	937.5	984.4
341	03_Dq16_Sr17	23	N	2	3	16	1	0	2	872	20	F	Mandarin	N			NA	N	38	33		NA	NA	NA	0.52381	0.575758	0.564103	RDq16	RSr17	RDq16_2254.wav	0.867	491.5	1019.9	528.4	826.3	168.34	577	1016	0.8	0.922722	553.625	-58.209	0.000195551	1.63942	34.19	12.18	5.44	937.5	984.4
342	03_Dq16_Sr17	46	N	2	3	24	1	1	1	964	18	F	English	N			NA	Y	45	25		39	42	81	0.619048	0.515152	0.589744	RDq16	RSr17	RDq16_2254.wav	0.867	491.5	1019.9	528.4	826.3	168.34	577	1016	0.8	0.922722	553.625	-58.209	0.000195551	1.63942	34.19	12.18	5.44	937.5	984.4
343	03_Dq16_Sr17	75	N	2	2	5	1	1	1	643	19	M	Chinese	Y	fruitfly, termites	1.5	NA	N	58	38		NA	NA	NA	0.547619	0.484848	0.461538	RDq16	RSr17	RDq16_2254.wav	0.867	491.5	1019.9	528.4	826.3	168.34	577	1016	0.8	0.922722	553.625	-58.209	0.000195551	1.63942	34.19	12.18	5.44	937.5	984.4
344	03_Dq16_Sr17	92	N	2	2	31	1	0	2	312	18	F	English	N			NA	Y	45	30		36	36	72	0.595238	0.212121	0.589744	RDq16	RSr17	RDq16_2254.wav	0.867	491.5	1019.9	528.4	826.3	168.34	577	1016	0.8	0.922722	553.625	-58.209	0.000195551	1.63942	34.19	12.18	5.44	937.5	984.4
345	03_Dq16_Sr17	38	N	2	4	34	1	0	2	1854	18	F	English	N			NA	Y	57	36		41	41	82	0.619048	0.606061	0.615385	RDq16	RSr17	RDq16_2254.wav	0.867	491.5	1019.9	528.4	826.3	168.34	577	1016	0.8	0.922722	553.625	-58.209	0.000195551	1.63942	34.19	12.18	5.44	937.5	984.4
346	03_Dq16_Sr17	505	Y	2	2	34	1	0	2	466	30	F	English	Y	Rhesus macaque, horses, dogs, cats, birds, mangabey	120	94	Y	NA	NA		NA	NA	NA	0.595238	1	0.589744	RDq16	RSr17	RDq16_2254.wav	0.867	491.5	1019.9	528.4	826.3	168.34	577	1016	0.8	0.922722	553.625	-58.209	0.000195551	1.63942	34.19	12.18	5.44	937.5	984.4
347	03_Dq16_Sr17	95	N	2	2	18	1	0	2	1390	20	F	English	N			NA	Y	57	30		39	44	83	0.571429	0.363636	0.564103	RDq16	RSr17	RDq16_2254.wav	0.867	491.5	1019.9	528.4	826.3	168.34	577	1016	0.8	0.922722	553.625	-58.209	0.000195551	1.63942	34.19	12.18	5.44	937.5	984.4
348	03_Dq16_Sr17	54	N	2	1	4	1	0	2	500	18	F	Chinese	N			NA	N	35	41		NA	NA	NA	0.535714	0.424242	0.538462	RDq16	RSr17	RDq16_2254.wav	0.867	491.5	1019.9	528.4	826.3	168.34	577	1016	0.8	0.922722	553.625	-58.209	0.000195551	1.63942	34.19	12.18	5.44	937.5	984.4
349	03_Dq16_Sr17	50	N	2	4	18	1	0	2	134	19	F	English	Y	dogs, cats	12	NA	Y	53	40		24	19	43	0.5	0.212121	0.512821	RDq16	RSr17	RDq16_2254.wav	0.867	491.5	1019.9	528.4	826.3	168.34	577	1016	0.8	0.922722	553.625	-58.209	0.000195551	1.63942	34.19	12.18	5.44	937.5	984.4
350	03_Dq16_Sr17	35	N	2	1	41	1	0	2	933	19	M	English	N			NA	N	40	21		44	39	83	0.666667	0.818182	0.641026	RDq16	RSr17	RDq16_2254.wav	0.867	491.5	1019.9	528.4	826.3	168.34	577	1016	0.8	0.922722	553.625	-58.209	0.000195551	1.63942	34.19	12.18	5.44	937.5	984.4
351	03_Dq16_Sr17	22	N	2	1	40	1	1	1	761	31	F	English	Y	dogs, cats	6	NA	Y	56	49		47	46	93	0.452381	0.515152	0.692308	RDq16	RSr17	RDq16_2254.wav	0.867	491.5	1019.9	528.4	826.3	168.34	577	1016	0.8	0.922722	553.625	-58.209	0.000195551	1.63942	34.19	12.18	5.44	937.5	984.4
352	03_Dq16_Sr17	18	N	2	2	9	1	1	1	921	20	F	English	N			NA	Y	44	35		32	42	74	0.571429	0.151515	0.333333	RDq16	RSr17	RDq16_2254.wav	0.867	491.5	1019.9	528.4	826.3	168.34	577	1016	0.8	0.922722	553.625	-58.209	0.000195551	1.63942	34.19	12.18	5.44	937.5	984.4
353	03_Dq16_Sr17	79	N	2	1	14	1	1	1	236	21	M	English	N			NA	Y	55	38		33	34	67	0.571429	0.393939	0.564103	RDq16	RSr17	RDq16_2254.wav	0.867	491.5	1019.9	528.4	826.3	168.34	577	1016	0.8	0.922722	553.625	-58.209	0.000195551	1.63942	34.19	12.18	5.44	937.5	984.4
354	03_Dq16_Sr17	112	N	2	2	6	1	1	1	2021	18	M	Turkish	N			NA	Y	55	40		NA	NA	NA	0.535714	0.424242	0.461538	RDq16	RSr17	RDq16_2254.wav	0.867	491.5	1019.9	528.4	826.3	168.34	577	1016	0.8	0.922722	553.625	-58.209	0.000195551	1.63942	34.19	12.18	5.44	937.5	984.4
355	03_Dq16_Sr17	106	N	2	4	26	1	0	2	413	18	F	Korean	N			NA	Y	53	39		NA	NA	NA	0.607143	0.606061	0.461538	RDq16	RSr17	RDq16_2254.wav	0.867	491.5	1019.9	528.4	826.3	168.34	577	1016	0.8	0.922722	553.625	-58.209	0.000195551	1.63942	34.19	12.18	5.44	937.5	984.4
356	03_Dq16_Sr17	16	N	2	1	14	1	0	2	133	21	F	English	Y	dogs, cats	6	NA	Y	44	43		38	40	78	0.559524	0.545455	0.461538	RDq16	RSr17	RDq16_2254.wav	0.867	491.5	1019.9	528.4	826.3	168.34	577	1016	0.8	0.922722	553.625	-58.209	0.000195551	1.63942	34.19	12.18	5.44	937.5	984.4
357	03_Dq16_Sr17	72	N	2	3	16	1	1	1	214	19	F	English	N			NA	Y	48	33		35	31	66	0.511905	0.69697	0.538462	RDq16	RSr17	RDq16_2254.wav	0.867	491.5	1019.9	528.4	826.3	168.34	577	1016	0.8	0.922722	553.625	-58.209	0.000195551	1.63942	34.19	12.18	5.44	937.5	984.4
358	03_Dq16_Sr17	6	N	2	1	4	1	0	2	606	23	M	English	Y	mice	3	NA	Y	31	28		38	41	79	0.595238	0.484848	0.589744	RDq16	RSr17	RDq16_2254.wav	0.867	491.5	1019.9	528.4	826.3	168.34	577	1016	0.8	0.922722	553.625	-58.209	0.000195551	1.63942	34.19	12.18	5.44	937.5	984.4
359	03_Dq16_Sr17	507	Y	2	1	2	1	0	2	3580	27	F	English	Y	Rhesus macaque, tufted capuchins	60	48	Y	NA	NA		NA	NA	NA	0.547619	1	0.666667	RDq16	RSr17	RDq16_2254.wav	0.867	491.5	1019.9	528.4	826.3	168.34	577	1016	0.8	0.922722	553.625	-58.209	0.000195551	1.63942	34.19	12.18	5.44	937.5	984.4
360	03_Dq16_Sr17	56	N	2	2	5	1	0	2	458	18	F	Chinese	N			NA	Y	31	30		NA	NA	NA	0.595238	0.575758	0.384615	RDq16	RSr17	RDq16_2254.wav	0.867	491.5	1019.9	528.4	826.3	168.34	577	1016	0.8	0.922722	553.625	-58.209	0.000195551	1.63942	34.19	12.18	5.44	937.5	984.4
361	03_Dq16_Sr17	510	Y	2	1	11	1	1	1	4165	30	M	English	Y	Rhesus macaque, Sooty mangabey	60	60	Y	NA	NA	asked for more clarification on "intense emotion" ~3 min into task	NA	NA	NA	0.511905	0.727273	0.717949	RDq16	RSr17	RDq16_2254.wav	0.867	491.5	1019.9	528.4	826.3	168.34	577	1016	0.8	0.922722	553.625	-58.209	0.000195551	1.63942	34.19	12.18	5.44	937.5	984.4
362	03_Dq16_Sr17	25	N	2	3	7	1	1	1	248	21	M	English	N			NA	N	56	32		34	41	75	0.5	0.575758	0.461538	RDq16	RSr17	RDq16_2254.wav	0.867	491.5	1019.9	528.4	826.3	168.34	577	1016	0.8	0.922722	553.625	-58.209	0.000195551	1.63942	34.19	12.18	5.44	937.5	984.4
363	03_Dq16_Sr17	36	N	2	3	18	1	1	1	444	19	F	English	Y	dogs, cats	4	NA	Y	53	31		42	42	84	0.416667	0.606061	0.435897	RDq16	RSr17	RDq16_2254.wav	0.867	491.5	1019.9	528.4	826.3	168.34	577	1016	0.8	0.922722	553.625	-58.209	0.000195551	1.63942	34.19	12.18	5.44	937.5	984.4
364	03_Dq16_Sr17	52	N	2	2	13	1	1	1	398	19	F	English	N			NA	Y	55	38		42	43	85	0.619048	0.393939	0.512821	RDq16	RSr17	RDq16_2254.wav	0.867	491.5	1019.9	528.4	826.3	168.34	577	1016	0.8	0.922722	553.625	-58.209	0.000195551	1.63942	34.19	12.18	5.44	937.5	984.4
365	03_Dq16_Sr17	26	N	2	1	9	1	1	1	449	24	M	Telugu	N			NA	N	41	35		NA	NA	NA	0.607143	0.515152	0.538462	RDq16	RSr17	RDq16_2254.wav	0.867	491.5	1019.9	528.4	826.3	168.34	577	1016	0.8	0.922722	553.625	-58.209	0.000195551	1.63942	34.19	12.18	5.44	937.5	984.4
366	03_Dq16_Sr17	40	N	2	2	21	1	1	1	315	19	F	Chinese	N			NA	N	39	39		NA	NA	NA	0.666667	0.515152	0.512821	RDq16	RSr17	RDq16_2254.wav	0.867	491.5	1019.9	528.4	826.3	168.34	577	1016	0.8	0.922722	553.625	-58.209	0.000195551	1.63942	34.19	12.18	5.44	937.5	984.4
367	03_Dq16_Sr17	65	N	2	2	28	1	0	2	231	20	F	Arabic	Y			NA	N	36	35		NA	NA	NA	0.559524	0.363636	0.564103	RDq16	RSr17	RDq16_2254.wav	0.867	491.5	1019.9	528.4	826.3	168.34	577	1016	0.8	0.922722	553.625	-58.209	0.000195551	1.63942	34.19	12.18	5.44	937.5	984.4
368	03_Dq16_Sr17	96	N	2	1	17	1	0	2	244	18	F	English	N			NA	Y	59	39		44	47	91	0.583333	0.727273	0.512821	RDq16	RSr17	RDq16_2254.wav	0.867	491.5	1019.9	528.4	826.3	168.34	577	1016	0.8	0.922722	553.625	-58.209	0.000195551	1.63942	34.19	12.18	5.44	937.5	984.4
369	03_Dq16_Sr17	90	N	2	3	11	1	0	2	224	21	M	English	N			NA	N	43	24		42	42	84	0.52381	0.69697	0.641026	RDq16	RSr17	RDq16_2254.wav	0.867	491.5	1019.9	528.4	826.3	168.34	577	1016	0.8	0.922722	553.625	-58.209	0.000195551	1.63942	34.19	12.18	5.44	937.5	984.4
370	03_Dq16_Sr17	104	N	2	1	33	1	0	2	140	19	F	Bangla	N			NA	N	49	31		NA	NA	NA	0.619048	0.363636	0.384615	RDq16	RSr17	RDq16_2254.wav	0.867	491.5	1019.9	528.4	826.3	168.34	577	1016	0.8	0.922722	553.625	-58.209	0.000195551	1.63942	34.19	12.18	5.44	937.5	984.4
371	03_Dq16_Sr17	78	N	2	2	13	1	0	2	220	20	M	Spanish	Y	dogs, snakes	2	NA	Y	45	35		NA	NA	NA	0.547619	0.424242	0.487179	RDq16	RSr17	RDq16_2254.wav	0.867	491.5	1019.9	528.4	826.3	168.34	577	1016	0.8	0.922722	553.625	-58.209	0.000195551	1.63942	34.19	12.18	5.44	937.5	984.4
372	03_Dq16_Sr17	74	N	2	4	20	1	1	1	683	19	F	English	Y	cats, dogs	1	NA	Y	47	41		41	43	84	0.428571	0.272727	0.538462	RDq16	RSr17	RDq16_2254.wav	0.867	491.5	1019.9	528.4	826.3	168.34	577	1016	0.8	0.922722	553.625	-58.209	0.000195551	1.63942	34.19	12.18	5.44	937.5	984.4
373	03_Dq16_Sr17	44	N	2	1	30	1	1	1	720	31	F	English	N			NA	Y	39	34		47	45	92	0.571429	0.606061	0.333333	RDq16	RSr17	RDq16_2254.wav	0.867	491.5	1019.9	528.4	826.3	168.34	577	1016	0.8	0.922722	553.625	-58.209	0.000195551	1.63942	34.19	12.18	5.44	937.5	984.4
374	03_Dq16_Sr17	85	N	2	1	30	1	0	2	217	19	F	Chinese	N			NA	Y	25	32		NA	NA	NA	0.571429	0.363636	0.435897	RDq16	RSr17	RDq16_2254.wav	0.867	491.5	1019.9	528.4	826.3	168.34	577	1016	0.8	0.922722	553.625	-58.209	0.000195551	1.63942	34.19	12.18	5.44	937.5	984.4
375	03_Dq16_Sr17	2	N	2	3	3	1	0	2	408	19	F	English	N			NA	Y	49	42		36	37	73	0.595238	0.0606061	0.641026	RDq16	RSr17	RDq16_2254.wav	0.867	491.5	1019.9	528.4	826.3	168.34	577	1016	0.8	0.922722	553.625	-58.209	0.000195551	1.63942	34.19	12.18	5.44	937.5	984.4
376	04_Yg17_Dq16	74	N	2	4	40	2	1	2	240	19	F	English	Y	cats, dogs	1	NA	Y	47	41		41	43	84	0.428571	0.272727	0.538462	RDq16	RYg17	RYg17_2504.wav	0.696	763.3	986	222.7	923.7	66.88	763	961	0.4	0.574713	557.5	-84.4595	2.37e-05	0.68285	45.6	20.96	5.15	843.8	1875
377	04_Yg17_Dq16	82	N	2	2	35	2	1	2	260	18	F	Korean	Y	dogs, cats	3	NA	Y	31	40		NA	NA	NA	0.559524	0.333333	0.641026	RDq16	RYg17	RYg17_2504.wav	0.696	763.3	986	222.7	923.7	66.88	763	961	0.4	0.574713	557.5	-84.4595	2.37e-05	0.68285	45.6	20.96	5.15	843.8	1875
378	04_Yg17_Dq16	509	Y	2	1	17	2	0	1	723	28	M	Spanish/English	Y	Rhesus macaque, mangabey	48	48	Y	NA	NA		NA	NA	NA	0.464286	0.969697	0.615385	RDq16	RYg17	RYg17_2504.wav	0.696	763.3	986	222.7	923.7	66.88	763	961	0.4	0.574713	557.5	-84.4595	2.37e-05	0.68285	45.6	20.96	5.15	843.8	1875
379	04_Yg17_Dq16	93	N	2	1	42	2	0	1	1035	19	F	English	N			NA	Y	53	37		38	38	76	0.52381	0.30303	0.487179	RDq16	RYg17	RYg17_2504.wav	0.696	763.3	986	222.7	923.7	66.88	763	961	0.4	0.574713	557.5	-84.4595	2.37e-05	0.68285	45.6	20.96	5.15	843.8	1875
380	04_Yg17_Dq16	94	N	2	2	21	2	1	2	210	20	F	English	N			NA	Y	45	44		40	44	84	0.72619	0.878788	0.410256	RDq16	RYg17	RYg17_2504.wav	0.696	763.3	986	222.7	923.7	66.88	763	961	0.4	0.574713	557.5	-84.4595	2.37e-05	0.68285	45.6	20.96	5.15	843.8	1875
381	04_Yg17_Dq16	108	N	2	2	40	2	1	2	255	19	M	English	N			NA	N	59	24		45	43	88	0.571429	0.393939	0.435897	RDq16	RYg17	RYg17_2504.wav	0.696	763.3	986	222.7	923.7	66.88	763	961	0.4	0.574713	557.5	-84.4595	2.37e-05	0.68285	45.6	20.96	5.15	843.8	1875
382	04_Yg17_Dq16	66	N	2	2	39	2	1	2	2263	20	M	Chinese	N			NA	N	41	38		NA	NA	NA	0.47619	0.69697	0.512821	RDq16	RYg17	RYg17_2504.wav	0.696	763.3	986	222.7	923.7	66.88	763	961	0.4	0.574713	557.5	-84.4595	2.37e-05	0.68285	45.6	20.96	5.15	843.8	1875
383	04_Yg17_Dq16	73	N	2	1	9	2	1	2	113	19	F	English and Chinese	N			NA	Y	41	37		34	36	70	0.571429	0.575758	0.538462	RDq16	RYg17	RYg17_2504.wav	0.696	763.3	986	222.7	923.7	66.88	763	961	0.4	0.574713	557.5	-84.4595	2.37e-05	0.68285	45.6	20.96	5.15	843.8	1875
384	04_Yg17_Dq16	47	N	2	3	2	2	1	2	247	18	F	English	N			NA	Y	60	42		42	45	87	0.47619	0.30303	0.333333	RDq16	RYg17	RYg17_2504.wav	0.696	763.3	986	222.7	923.7	66.88	763	961	0.4	0.574713	557.5	-84.4595	2.37e-05	0.68285	45.6	20.96	5.15	843.8	1875
385	04_Yg17_Dq16	102	N	2	1	16	2	1	2	0	18	F	English	Y	elephants, dogs, tortoises	3	NA	Y	46	44		33	36	69	0.559524	0.424242	0.461538	RDq16	RYg17	RYg17_2504.wav	0.696	763.3	986	222.7	923.7	66.88	763	961	0.4	0.574713	557.5	-84.4595	2.37e-05	0.68285	45.6	20.96	5.15	843.8	1875
386	04_Yg17_Dq16	46	N	2	3	14	2	1	2	360	18	F	English	N			NA	Y	45	25		39	42	81	0.619048	0.515152	0.589744	RDq16	RYg17	RYg17_2504.wav	0.696	763.3	986	222.7	923.7	66.88	763	961	0.4	0.574713	557.5	-84.4595	2.37e-05	0.68285	45.6	20.96	5.15	843.8	1875
387	04_Yg17_Dq16	80	N	2	4	21	2	1	2	265	18	F	English	N			NA	Y	57	34		36	3	39	0.607143	0.545455	0.358974	RDq16	RYg17	RYg17_2504.wav	0.696	763.3	986	222.7	923.7	66.88	763	961	0.4	0.574713	557.5	-84.4595	2.37e-05	0.68285	45.6	20.96	5.15	843.8	1875
388	04_Yg17_Dq16	78	N	2	2	1	2	1	2	344	20	M	Spanish	Y	dogs, snakes	2	NA	Y	45	35		NA	NA	NA	0.547619	0.424242	0.487179	RDq16	RYg17	RYg17_2504.wav	0.696	763.3	986	222.7	923.7	66.88	763	961	0.4	0.574713	557.5	-84.4595	2.37e-05	0.68285	45.6	20.96	5.15	843.8	1875
389	04_Yg17_Dq16	35	N	2	1	6	2	1	2	466	19	M	English	N			NA	N	40	21		44	39	83	0.666667	0.818182	0.641026	RDq16	RYg17	RYg17_2504.wav	0.696	763.3	986	222.7	923.7	66.88	763	961	0.4	0.574713	557.5	-84.4595	2.37e-05	0.68285	45.6	20.96	5.15	843.8	1875
390	04_Yg17_Dq16	70	N	2	3	33	2	1	2	75	18	F	English	N			NA	Y	62	34		48	45	93	0.52381	0.242424	0.384615	RDq16	RYg17	RYg17_2504.wav	0.696	763.3	986	222.7	923.7	66.88	763	961	0.4	0.574713	557.5	-84.4595	2.37e-05	0.68285	45.6	20.96	5.15	843.8	1875
391	04_Yg17_Dq16	97	N	2	4	13	2	0	1	349	19	F	English	N			NA	Y	48	28		40	43	83	0.595238	0.606061	0.487179	RDq16	RYg17	RYg17_2504.wav	0.696	763.3	986	222.7	923.7	66.88	763	961	0.4	0.574713	557.5	-84.4595	2.37e-05	0.68285	45.6	20.96	5.15	843.8	1875
392	04_Yg17_Dq16	7	N	2	1	41	2	1	2	400	21	F	English	N			NA	Y	49	33		44	43	87	0.583333	0.363636	0.615385	RDq16	RYg17	RYg17_2504.wav	0.696	763.3	986	222.7	923.7	66.88	763	961	0.4	0.574713	557.5	-84.4595	2.37e-05	0.68285	45.6	20.96	5.15	843.8	1875
393	04_Yg17_Dq16	18	N	2	2	5	2	1	2	1544	20	F	English	N			NA	Y	44	35		32	42	74	0.571429	0.151515	0.333333	RDq16	RYg17	RYg17_2504.wav	0.696	763.3	986	222.7	923.7	66.88	763	961	0.4	0.574713	557.5	-84.4595	2.37e-05	0.68285	45.6	20.96	5.15	843.8	1875
394	04_Yg17_Dq16	112	N	2	2	7	2	1	2	300	18	M	Turkish	N			NA	Y	55	40		NA	NA	NA	0.535714	0.424242	0.461538	RDq16	RYg17	RYg17_2504.wav	0.696	763.3	986	222.7	923.7	66.88	763	961	0.4	0.574713	557.5	-84.4595	2.37e-05	0.68285	45.6	20.96	5.15	843.8	1875
395	04_Yg17_Dq16	6	N	2	1	11	2	1	2	530	23	M	English	Y	mice	3	NA	Y	31	28		38	41	79	0.595238	0.484848	0.589744	RDq16	RYg17	RYg17_2504.wav	0.696	763.3	986	222.7	923.7	66.88	763	961	0.4	0.574713	557.5	-84.4595	2.37e-05	0.68285	45.6	20.96	5.15	843.8	1875
396	04_Yg17_Dq16	33	N	2	2	14	2	1	2	242	19	F	Mandarin + English	N			NA	Y	56	33		NA	NA	NA	0.571429	0.272727	0.615385	RDq16	RYg17	RYg17_2504.wav	0.696	763.3	986	222.7	923.7	66.88	763	961	0.4	0.574713	557.5	-84.4595	2.37e-05	0.68285	45.6	20.96	5.15	843.8	1875
397	04_Yg17_Dq16	57	N	2	4	10	2	1	2	260	20	F	English	N			NA	N	29	31		27	41	68	0.547619	0.333333	0.538462	RDq16	RYg17	RYg17_2504.wav	0.696	763.3	986	222.7	923.7	66.88	763	961	0.4	0.574713	557.5	-84.4595	2.37e-05	0.68285	45.6	20.96	5.15	843.8	1875
398	04_Yg17_Dq16	27	N	2	4	17	2	1	2	431	23	F	Telugu	N			NA	N	32	44		NA	NA	NA	0.547619	0.151515	0.512821	RDq16	RYg17	RYg17_2504.wav	0.696	763.3	986	222.7	923.7	66.88	763	961	0.4	0.574713	557.5	-84.4595	2.37e-05	0.68285	45.6	20.96	5.15	843.8	1875
399	04_Yg17_Dq16	31	N	2	4	13	2	1	2	512	18	F	English	N			NA	Y	47	35		38	40	78	0.583333	0.575758	0.384615	RDq16	RYg17	RYg17_2504.wav	0.696	763.3	986	222.7	923.7	66.88	763	961	0.4	0.574713	557.5	-84.4595	2.37e-05	0.68285	45.6	20.96	5.15	843.8	1875
400	04_Yg17_Dq16	502	Y	2	1	39	2	1	2	1661	39	F	English	Y	Rhesus, pigrails, gorillas, orangutans, lemurs	216	204	Y	63	30		45	43	88	0.642857	0.909091	0.666667	RDq16	RYg17	RYg17_2504.wav	0.696	763.3	986	222.7	923.7	66.88	763	961	0.4	0.574713	557.5	-84.4595	2.37e-05	0.68285	45.6	20.96	5.15	843.8	1875
401	04_Yg17_Dq16	89	N	2	1	14	2	1	2	643	18	F	Spanish	N			NA	Y	50	37		NA	NA	NA	0.619048	0.818182	0.589744	RDq16	RYg17	RYg17_2504.wav	0.696	763.3	986	222.7	923.7	66.88	763	961	0.4	0.574713	557.5	-84.4595	2.37e-05	0.68285	45.6	20.96	5.15	843.8	1875
402	04_Yg17_Dq16	36	N	2	3	37	2	1	2	400	19	F	English	Y	dogs, cats	4	NA	Y	53	31		42	42	84	0.416667	0.606061	0.435897	RDq16	RYg17	RYg17_2504.wav	0.696	763.3	986	222.7	923.7	66.88	763	961	0.4	0.574713	557.5	-84.4595	2.37e-05	0.68285	45.6	20.96	5.15	843.8	1875
403	04_Yg17_Dq16	42	N	2	2	31	2	1	2	201	19	F	English	N			NA	N	35	28		44	44	88	0.571429	0.454545	0.692308	RDq16	RYg17	RYg17_2504.wav	0.696	763.3	986	222.7	923.7	66.88	763	961	0.4	0.574713	557.5	-84.4595	2.37e-05	0.68285	45.6	20.96	5.15	843.8	1875
404	04_Yg17_Dq16	104	N	2	1	4	2	1	2	576	19	F	Bangla	N			NA	N	49	31		NA	NA	NA	0.619048	0.363636	0.384615	RDq16	RYg17	RYg17_2504.wav	0.696	763.3	986	222.7	923.7	66.88	763	961	0.4	0.574713	557.5	-84.4595	2.37e-05	0.68285	45.6	20.96	5.15	843.8	1875
405	04_Yg17_Dq16	115	N	2	4	31	2	1	2	1137	18	M	Mandarin	N			NA	N	31	37		NA	NA	NA	0.583333	0.575758	0.461538	RDq16	RYg17	RYg17_2504.wav	0.696	763.3	986	222.7	923.7	66.88	763	961	0.4	0.574713	557.5	-84.4595	2.37e-05	0.68285	45.6	20.96	5.15	843.8	1875
406	04_Yg17_Dq16	88	N	2	1	14	2	1	2	561	19	M	Mandarin	N			NA	Y	49	27		NA	NA	NA	0.547619	0.818182	0.538462	RDq16	RYg17	RYg17_2504.wav	0.696	763.3	986	222.7	923.7	66.88	763	961	0.4	0.574713	557.5	-84.4595	2.37e-05	0.68285	45.6	20.96	5.15	843.8	1875
407	04_Yg17_Dq16	110	N	2	1	12	2	0	1	778	19	M	English	N			NA	Y	40	32		35	38	73	0.511905	0.69697	0.564103	RDq16	RYg17	RYg17_2504.wav	0.696	763.3	986	222.7	923.7	66.88	763	961	0.4	0.574713	557.5	-84.4595	2.37e-05	0.68285	45.6	20.96	5.15	843.8	1875
408	04_Yg17_Dq16	76	N	2	4	42	2	0	1	817	19	F	Chinese	N			NA	Y	41	41		NA	NA	NA	0.630952	0.393939	0.538462	RDq16	RYg17	RYg17_2504.wav	0.696	763.3	986	222.7	923.7	66.88	763	961	0.4	0.574713	557.5	-84.4595	2.37e-05	0.68285	45.6	20.96	5.15	843.8	1875
409	04_Yg17_Dq16	28	N	2	2	13	2	1	2	1623	40	F	English	N			NA	Y	50	33		42	NA	NA	0.630952	0.606061	0.564103	RDq16	RYg17	RYg17_2504.wav	0.696	763.3	986	222.7	923.7	66.88	763	961	0.4	0.574713	557.5	-84.4595	2.37e-05	0.68285	45.6	20.96	5.15	843.8	1875
410	04_Yg17_Dq16	501	Y	2	4	18	2	0	1	57	26	M	English	Y	lemurs (black white ruffed, ringtail, red bellied, crown, mongoose), Rhesus monkeys, gorillas, orangutans	Lemur: 24, Rh: 48, Gorilla: 12, Orangutan: 12	48	Y	47	37		46	44	90	0.559524	0.69697	0.461538	RDq16	RYg17	RYg17_2504.wav	0.696	763.3	986	222.7	923.7	66.88	763	961	0.4	0.574713	557.5	-84.4595	2.37e-05	0.68285	45.6	20.96	5.15	843.8	1875
411	04_Yg17_Dq16	505	Y	2	2	28	2	1	2	4410	30	F	English	Y	Rhesus macaque, horses, dogs, cats, birds, mangabey	120	94	Y	NA	NA		NA	NA	NA	0.595238	1	0.589744	RDq16	RYg17	RYg17_2504.wav	0.696	763.3	986	222.7	923.7	66.88	763	961	0.4	0.574713	557.5	-84.4595	2.37e-05	0.68285	45.6	20.96	5.15	843.8	1875
412	04_Yg17_Dq16	103	N	2	4	31	2	1	2	231	19	F	Korean + English	Y	dogs, cats	3	NA	Y	47	39		40	41	81	0.52381	0.393939	0.512821	RDq16	RYg17	RYg17_2504.wav	0.696	763.3	986	222.7	923.7	66.88	763	961	0.4	0.574713	557.5	-84.4595	2.37e-05	0.68285	45.6	20.96	5.15	843.8	1875
413	04_Yg17_Dq16	4	N	2	3	14	2	1	2	246	20	M	English	N			NA	N	43	38		27	24	51	0.559524	0.424242	0.589744	RDq16	RYg17	RYg17_2504.wav	0.696	763.3	986	222.7	923.7	66.88	763	961	0.4	0.574713	557.5	-84.4595	2.37e-05	0.68285	45.6	20.96	5.15	843.8	1875
414	04_Yg17_Dq16	86	N	2	1	3	2	1	2	191	22	M	Chinese	N			NA	Y	44	35		NA	NA	NA	0.666667	0.515152	0.641026	RDq16	RYg17	RYg17_2504.wav	0.696	763.3	986	222.7	923.7	66.88	763	961	0.4	0.574713	557.5	-84.4595	2.37e-05	0.68285	45.6	20.96	5.15	843.8	1875
415	04_Yg17_Dq16	87	N	2	4	13	2	1	2	913	19	F	Korean	N			NA	Y	53	41		NA	NA	NA	0.654762	0.787879	0.615385	RDq16	RYg17	RYg17_2504.wav	0.696	763.3	986	222.7	923.7	66.88	763	961	0.4	0.574713	557.5	-84.4595	2.37e-05	0.68285	45.6	20.96	5.15	843.8	1875
416	04_Yg17_Dq16	23	N	2	3	37	2	0	1	341	20	F	Mandarin	N			NA	N	38	33		NA	NA	NA	0.52381	0.575758	0.564103	RDq16	RYg17	RYg17_2504.wav	0.696	763.3	986	222.7	923.7	66.88	763	961	0.4	0.574713	557.5	-84.4595	2.37e-05	0.68285	45.6	20.96	5.15	843.8	1875
417	04_Yg17_Dq16	44	N	2	1	4	2	1	2	726	31	F	English	N			NA	Y	39	34		47	45	92	0.571429	0.606061	0.333333	RDq16	RYg17	RYg17_2504.wav	0.696	763.3	986	222.7	923.7	66.88	763	961	0.4	0.574713	557.5	-84.4595	2.37e-05	0.68285	45.6	20.96	5.15	843.8	1875
418	04_Yg17_Dq16	106	N	2	4	29	2	1	2	683	18	F	Korean	N			NA	Y	53	39		NA	NA	NA	0.607143	0.606061	0.461538	RDq16	RYg17	RYg17_2504.wav	0.696	763.3	986	222.7	923.7	66.88	763	961	0.4	0.574713	557.5	-84.4595	2.37e-05	0.68285	45.6	20.96	5.15	843.8	1875
419	04_Yg17_Dq16	10	N	2	3	25	2	1	2	406	21	F	English	N			NA	Y	50	38		36	38	74	0.559524	0.757576	0.358974	RDq16	RYg17	RYg17_2504.wav	0.696	763.3	986	222.7	923.7	66.88	763	961	0.4	0.574713	557.5	-84.4595	2.37e-05	0.68285	45.6	20.96	5.15	843.8	1875
420	04_Yg17_Dq16	49	N	2	4	32	2	1	2	347	18	F	English	N			NA	N	44	28		42	2	44	0.642857	0.454545	0.487179	RDq16	RYg17	RYg17_2504.wav	0.696	763.3	986	222.7	923.7	66.88	763	961	0.4	0.574713	557.5	-84.4595	2.37e-05	0.68285	45.6	20.96	5.15	843.8	1875
421	04_Yg17_Dq16	17	N	2	2	14	2	1	2	779	19	F	Chinese	N			NA	Y	49	34		NA	NA	NA	0.595238	1	0.487179	RDq16	RYg17	RYg17_2504.wav	0.696	763.3	986	222.7	923.7	66.88	763	961	0.4	0.574713	557.5	-84.4595	2.37e-05	0.68285	45.6	20.96	5.15	843.8	1875
422	04_Yg17_Dq16	84	N	2	3	23	2	1	2	306	19	F	English	N			NA	Y	34	36		35	37	72	0.547619	0.575758	0.512821	RDq16	RYg17	RYg17_2504.wav	0.696	763.3	986	222.7	923.7	66.88	763	961	0.4	0.574713	557.5	-84.4595	2.37e-05	0.68285	45.6	20.96	5.15	843.8	1875
423	04_Yg17_Dq16	65	N	2	2	24	2	0	1	247	20	F	Arabic	Y			NA	N	36	35		NA	NA	NA	0.559524	0.363636	0.564103	RDq16	RYg17	RYg17_2504.wav	0.696	763.3	986	222.7	923.7	66.88	763	961	0.4	0.574713	557.5	-84.4595	2.37e-05	0.68285	45.6	20.96	5.15	843.8	1875
424	04_Yg17_Dq16	50	N	2	4	6	2	1	2	124	19	F	English	Y	dogs, cats	12	NA	Y	53	40		24	19	43	0.5	0.212121	0.512821	RDq16	RYg17	RYg17_2504.wav	0.696	763.3	986	222.7	923.7	66.88	763	961	0.4	0.574713	557.5	-84.4595	2.37e-05	0.68285	45.6	20.96	5.15	843.8	1875
425	04_Yg17_Dq16	37	N	2	2	16	2	1	2	64	19	F	Spanish	N			NA	Y	44	32		NA	NA	NA	0.52381	0.606061	0.641026	RDq16	RYg17	RYg17_2504.wav	0.696	763.3	986	222.7	923.7	66.88	763	961	0.4	0.574713	557.5	-84.4595	2.37e-05	0.68285	45.6	20.96	5.15	843.8	1875
426	04_Yg17_Dq16	101	N	2	4	39	2	1	2	560	19	F	English	Y	mice	11	NA	Y	50	40		43	43	86	0.690476	0.484848	0.487179	RDq16	RYg17	RYg17_2504.wav	0.696	763.3	986	222.7	923.7	66.88	763	961	0.4	0.574713	557.5	-84.4595	2.37e-05	0.68285	45.6	20.96	5.15	843.8	1875
427	04_Yg17_Dq16	506	Y	2	2	38	2	1	2	1550	37	F	English	Y	Rhesus macaque	120	120	Y	NA	NA		NA	NA	NA	0.559524	0.424242	0.487179	RDq16	RYg17	RYg17_2504.wav	0.696	763.3	986	222.7	923.7	66.88	763	961	0.4	0.574713	557.5	-84.4595	2.37e-05	0.68285	45.6	20.96	5.15	843.8	1875
428	04_Yg17_Dq16	51	N	2	1	8	2	1	2	213	18	F	English	N			NA	Y	31	36		45	44	89	0.654762	0.515152	0.615385	RDq16	RYg17	RYg17_2504.wav	0.696	763.3	986	222.7	923.7	66.88	763	961	0.4	0.574713	557.5	-84.4595	2.37e-05	0.68285	45.6	20.96	5.15	843.8	1875
429	04_Yg17_Dq16	9	N	2	1	16	2	1	2	635	19	M	English	Y	dogs, cats	3	NA	Y	41	31		35	32	67	0.416667	0.121212	0.435897	RDq16	RYg17	RYg17_2504.wav	0.696	763.3	986	222.7	923.7	66.88	763	961	0.4	0.574713	557.5	-84.4595	2.37e-05	0.68285	45.6	20.96	5.15	843.8	1875
430	04_Yg17_Dq16	77	N	2	3	13	2	1	2	30	19	M	Chinese	N			NA	Y	46	18		NA	NA	NA	0.595238	0.454545	0.538462	RDq16	RYg17	RYg17_2504.wav	0.696	763.3	986	222.7	923.7	66.88	763	961	0.4	0.574713	557.5	-84.4595	2.37e-05	0.68285	45.6	20.96	5.15	843.8	1875
431	04_Yg17_Dq16	62	N	2	4	33	2	1	2	262	18	F	English	Y	mice	1	NA	Y	59	32		46	40	86	0.559524	0.484848	0.538462	RDq16	RYg17	RYg17_2504.wav	0.696	763.3	986	222.7	923.7	66.88	763	961	0.4	0.574713	557.5	-84.4595	2.37e-05	0.68285	45.6	20.96	5.15	843.8	1875
432	04_Yg17_Dq16	56	N	2	2	24	2	1	2	342	18	F	Chinese	N			NA	Y	31	30		NA	NA	NA	0.595238	0.575758	0.384615	RDq16	RYg17	RYg17_2504.wav	0.696	763.3	986	222.7	923.7	66.88	763	961	0.4	0.574713	557.5	-84.4595	2.37e-05	0.68285	45.6	20.96	5.15	843.8	1875
433	04_Yg17_Dq16	90	N	2	3	30	2	1	2	475	21	M	English	N			NA	N	43	24		42	42	84	0.52381	0.69697	0.641026	RDq16	RYg17	RYg17_2504.wav	0.696	763.3	986	222.7	923.7	66.88	763	961	0.4	0.574713	557.5	-84.4595	2.37e-05	0.68285	45.6	20.96	5.15	843.8	1875
434	04_Yg17_Dq16	34	N	2	3	20	2	0	1	3442	24	M	Mandarin	N			NA	N	15	37		NA	NA	NA	0.511905	0.757576	0.282051	RDq16	RYg17	RYg17_2504.wav	0.696	763.3	986	222.7	923.7	66.88	763	961	0.4	0.574713	557.5	-84.4595	2.37e-05	0.68285	45.6	20.96	5.15	843.8	1875
435	04_Yg17_Dq16	79	N	2	1	21	2	1	2	171	21	M	English	N			NA	Y	55	38		33	34	67	0.571429	0.393939	0.564103	RDq16	RYg17	RYg17_2504.wav	0.696	763.3	986	222.7	923.7	66.88	763	961	0.4	0.574713	557.5	-84.4595	2.37e-05	0.68285	45.6	20.96	5.15	843.8	1875
436	04_Yg17_Dq16	512	Y	2	2	18	2	1	2	420	39	M	English	Y	Rhesus macaque, pigtail macaque, common chimpanzee, west lowland gorilla, Sooty mangabey	144	144	Y	NA	NA	occasionally needed to answer radio during task	NA	NA	NA	0.642857	1	0.589744	RDq16	RYg17	RYg17_2504.wav	0.696	763.3	986	222.7	923.7	66.88	763	961	0.4	0.574713	557.5	-84.4595	2.37e-05	0.68285	45.6	20.96	5.15	843.8	1875
437	04_Yg17_Dq16	1	N	2	1	27	2	1	2	328	20	F	English	Y	cats, dogs	12	NA	Y	38	33		NA	40	NA	0.642857	0.333333	0.564103	RDq16	RYg17	RYg17_2504.wav	0.696	763.3	986	222.7	923.7	66.88	763	961	0.4	0.574713	557.5	-84.4595	2.37e-05	0.68285	45.6	20.96	5.15	843.8	1875
438	04_Yg17_Dq16	20	Y	2	2	40	2	1	2	181	37	F	English	Y	Rhesus, chimpanzees, dogs, cats, mice, rats	180	132	Y	52	33		46	47	93	0.392857	0.454545	0.589744	RDq16	RYg17	RYg17_2504.wav	0.696	763.3	986	222.7	923.7	66.88	763	961	0.4	0.574713	557.5	-84.4595	2.37e-05	0.68285	45.6	20.96	5.15	843.8	1875
439	04_Yg17_Dq16	60	N	2	2	35	2	1	2	707	18	F	Chinese	N			NA	Y	54	33		NA	NA	NA	0.595238	0.69697	0.615385	RDq16	RYg17	RYg17_2504.wav	0.696	763.3	986	222.7	923.7	66.88	763	961	0.4	0.574713	557.5	-84.4595	2.37e-05	0.68285	45.6	20.96	5.15	843.8	1875
440	04_Yg17_Dq16	63	N	2	4	42	2	0	1	413	19	F	English	N			NA	N	60	40		44	42	86	0.535714	0	0.717949	RDq16	RYg17	RYg17_2504.wav	0.696	763.3	986	222.7	923.7	66.88	763	961	0.4	0.574713	557.5	-84.4595	2.37e-05	0.68285	45.6	20.96	5.15	843.8	1875
441	04_Yg17_Dq16	54	N	2	1	16	2	0	1	348	18	F	Chinese	N			NA	N	35	41		NA	NA	NA	0.535714	0.424242	0.538462	RDq16	RYg17	RYg17_2504.wav	0.696	763.3	986	222.7	923.7	66.88	763	961	0.4	0.574713	557.5	-84.4595	2.37e-05	0.68285	45.6	20.96	5.15	843.8	1875
442	04_Yg17_Dq16	507	Y	2	1	19	2	0	1	6378	27	F	English	Y	Rhesus macaque, tufted capuchins	60	48	Y	NA	NA		NA	NA	NA	0.547619	1	0.666667	RDq16	RYg17	RYg17_2504.wav	0.696	763.3	986	222.7	923.7	66.88	763	961	0.4	0.574713	557.5	-84.4595	2.37e-05	0.68285	45.6	20.96	5.15	843.8	1875
443	04_Yg17_Dq16	95	N	2	2	14	2	1	2	558	20	F	English	N			NA	Y	57	30		39	44	83	0.571429	0.363636	0.564103	RDq16	RYg17	RYg17_2504.wav	0.696	763.3	986	222.7	923.7	66.88	763	961	0.4	0.574713	557.5	-84.4595	2.37e-05	0.68285	45.6	20.96	5.15	843.8	1875
444	04_Yg17_Dq16	41	N	2	4	36	2	1	2	216	20	M	Vietnamese	N			NA	Y	45	29		NA	NA	NA	0.630952	0.454545	0.435897	RDq16	RYg17	RYg17_2504.wav	0.696	763.3	986	222.7	923.7	66.88	763	961	0.4	0.574713	557.5	-84.4595	2.37e-05	0.68285	45.6	20.96	5.15	843.8	1875
445	04_Yg17_Dq16	16	N	2	1	34	2	0	1	591	21	F	English	Y	dogs, cats	6	NA	Y	44	43		38	40	78	0.559524	0.545455	0.461538	RDq16	RYg17	RYg17_2504.wav	0.696	763.3	986	222.7	923.7	66.88	763	961	0.4	0.574713	557.5	-84.4595	2.37e-05	0.68285	45.6	20.96	5.15	843.8	1875
446	04_Yg17_Dq16	58	N	2	1	20	2	0	1	545	21	F	Spanish	Y	mice, rats	2	NA	Y	53	33		NA	NA	NA	0.547619	0.515152	0.461538	RDq16	RYg17	RYg17_2504.wav	0.696	763.3	986	222.7	923.7	66.88	763	961	0.4	0.574713	557.5	-84.4595	2.37e-05	0.68285	45.6	20.96	5.15	843.8	1875
447	04_Yg17_Dq16	513	Y	2	1	40	2	0	1	375	53	F	English	Y	chimps, bonobos, Rhesus macaque, Sooty mangabeys, pigtail macaque, gibbons, orangutan, stumptail macaques, baboons	288	288	Y	NA	NA		NA	NA	NA	0.535714	0.969697	0.589744	RDq16	RYg17	RYg17_2504.wav	0.696	763.3	986	222.7	923.7	66.88	763	961	0.4	0.574713	557.5	-84.4595	2.37e-05	0.68285	45.6	20.96	5.15	843.8	1875
448	04_Yg17_Dq16	96	N	2	1	19	2	0	1	748	18	F	English	N			NA	Y	59	39		44	47	91	0.583333	0.727273	0.512821	RDq16	RYg17	RYg17_2504.wav	0.696	763.3	986	222.7	923.7	66.88	763	961	0.4	0.574713	557.5	-84.4595	2.37e-05	0.68285	45.6	20.96	5.15	843.8	1875
449	04_Yg17_Dq16	25	N	2	3	31	2	0	1	374	21	M	English	N			NA	N	56	32		34	41	75	0.5	0.575758	0.461538	RDq16	RYg17	RYg17_2504.wav	0.696	763.3	986	222.7	923.7	66.88	763	961	0.4	0.574713	557.5	-84.4595	2.37e-05	0.68285	45.6	20.96	5.15	843.8	1875
450	04_Yg17_Dq16	64	N	2	4	40	2	1	2	56	18	F	English	N			NA	N	55	36		40	42	82	0.654762	0.393939	0.666667	RDq16	RYg17	RYg17_2504.wav	0.696	763.3	986	222.7	923.7	66.88	763	961	0.4	0.574713	557.5	-84.4595	2.37e-05	0.68285	45.6	20.96	5.15	843.8	1875
451	04_Yg17_Dq16	59	N	2	1	39	2	0	1	170	18	M	Gujarati	N			NA	N	37	38		NA	NA	NA	0.52381	0.393939	0.666667	RDq16	RYg17	RYg17_2504.wav	0.696	763.3	986	222.7	923.7	66.88	763	961	0.4	0.574713	557.5	-84.4595	2.37e-05	0.68285	45.6	20.96	5.15	843.8	1875
452	04_Yg17_Dq16	55	N	2	4	20	2	1	2	181	18	F	Mandarin	N			NA	Y	64	30		NA	NA	NA	0.690476	0.515152	0.410256	RDq16	RYg17	RYg17_2504.wav	0.696	763.3	986	222.7	923.7	66.88	763	961	0.4	0.574713	557.5	-84.4595	2.37e-05	0.68285	45.6	20.96	5.15	843.8	1875
453	04_Yg17_Dq16	67	N	2	3	41	2	1	2	54	18	F	English	N			NA	N	29	44		32	32	64	0.75	0.636364	0.564103	RDq16	RYg17	RYg17_2504.wav	0.696	763.3	986	222.7	923.7	66.88	763	961	0.4	0.574713	557.5	-84.4595	2.37e-05	0.68285	45.6	20.96	5.15	843.8	1875
454	04_Yg17_Dq16	105	N	2	2	29	2	0	1	1555	19	F	English	N			NA	Y	44	36		40	42	82	0.571429	0.606061	0.435897	RDq16	RYg17	RYg17_2504.wav	0.696	763.3	986	222.7	923.7	66.88	763	961	0.4	0.574713	557.5	-84.4595	2.37e-05	0.68285	45.6	20.96	5.15	843.8	1875
455	04_Yg17_Dq16	26	N	2	1	41	2	1	2	502	24	M	Telugu	N			NA	N	41	35		NA	NA	NA	0.607143	0.515152	0.538462	RDq16	RYg17	RYg17_2504.wav	0.696	763.3	986	222.7	923.7	66.88	763	961	0.4	0.574713	557.5	-84.4595	2.37e-05	0.68285	45.6	20.96	5.15	843.8	1875
456	04_Yg17_Dq16	71	N	2	2	27	2	0	1	155	19	M	English	N			NA	Y	44	36		43	43	86	0.595238	0.424242	0.333333	RDq16	RYg17	RYg17_2504.wav	0.696	763.3	986	222.7	923.7	66.88	763	961	0.4	0.574713	557.5	-84.4595	2.37e-05	0.68285	45.6	20.96	5.15	843.8	1875
457	04_Yg17_Dq16	5	N	2	3	36	2	1	2	55	29	F	English	Y	cat, dog, horse, cow	6+ years	NA	Y	41	35		46	49	95	0.583333	0.393939	0.564103	RDq16	RYg17	RYg17_2504.wav	0.696	763.3	986	222.7	923.7	66.88	763	961	0.4	0.574713	557.5	-84.4595	2.37e-05	0.68285	45.6	20.96	5.15	843.8	1875
458	04_Yg17_Dq16	91	N	2	1	22	2	1	2	213	20	F	Chinese	N			NA	N	49	36		NA	NA	NA	0.547619	0.606061	0.641026	RDq16	RYg17	RYg17_2504.wav	0.696	763.3	986	222.7	923.7	66.88	763	961	0.4	0.574713	557.5	-84.4595	2.37e-05	0.68285	45.6	20.96	5.15	843.8	1875
459	04_Yg17_Dq16	52	N	2	2	31	2	1	2	153	19	F	English	N			NA	Y	55	38		42	43	85	0.619048	0.393939	0.512821	RDq16	RYg17	RYg17_2504.wav	0.696	763.3	986	222.7	923.7	66.88	763	961	0.4	0.574713	557.5	-84.4595	2.37e-05	0.68285	45.6	20.96	5.15	843.8	1875
460	04_Yg17_Dq16	2	N	2	3	17	2	1	2	282	19	F	English	N			NA	Y	49	42		36	37	73	0.595238	0.0606061	0.641026	RDq16	RYg17	RYg17_2504.wav	0.696	763.3	986	222.7	923.7	66.88	763	961	0.4	0.574713	557.5	-84.4595	2.37e-05	0.68285	45.6	20.96	5.15	843.8	1875
461	04_Yg17_Dq16	19	N	2	3	2	2	0	1	1140	51	F	English	Y	mice	240	NA	Y	36	29		43	47	90	0.511905	0.575758	0.487179	RDq16	RYg17	RYg17_2504.wav	0.696	763.3	986	222.7	923.7	66.88	763	961	0.4	0.574713	557.5	-84.4595	2.37e-05	0.68285	45.6	20.96	5.15	843.8	1875
462	04_Yg17_Dq16	30	N	2	1	14	2	0	1	242	19	F	Chinese	N			NA	N	43	31		NA	NA	NA	0.535714	0.151515	0.641026	RDq16	RYg17	RYg17_2504.wav	0.696	763.3	986	222.7	923.7	66.88	763	961	0.4	0.574713	557.5	-84.4595	2.37e-05	0.68285	45.6	20.96	5.15	843.8	1875
463	04_Yg17_Dq16	85	N	2	1	27	2	1	2	1195	19	F	Chinese	N			NA	Y	25	32		NA	NA	NA	0.571429	0.363636	0.435897	RDq16	RYg17	RYg17_2504.wav	0.696	763.3	986	222.7	923.7	66.88	763	961	0.4	0.574713	557.5	-84.4595	2.37e-05	0.68285	45.6	20.96	5.15	843.8	1875
464	04_Yg17_Dq16	111	N	2	3	27	2	1	2	277	21	F	English	N			NA	N	39	39		40	36	76	0.511905	0.575758	0.512821	RDq16	RYg17	RYg17_2504.wav	0.696	763.3	986	222.7	923.7	66.88	763	961	0.4	0.574713	557.5	-84.4595	2.37e-05	0.68285	45.6	20.96	5.15	843.8	1875
465	04_Yg17_Dq16	92	N	2	2	19	2	1	2	469	18	F	English	N			NA	Y	45	30		36	36	72	0.595238	0.212121	0.589744	RDq16	RYg17	RYg17_2504.wav	0.696	763.3	986	222.7	923.7	66.88	763	961	0.4	0.574713	557.5	-84.4595	2.37e-05	0.68285	45.6	20.96	5.15	843.8	1875
466	04_Yg17_Dq16	83	N	2	3	9	2	1	2	330	19	F	English	N			NA	Y	55	46		48	46	94	0.5	0.333333	0.487179	RDq16	RYg17	RYg17_2504.wav	0.696	763.3	986	222.7	923.7	66.88	763	961	0.4	0.574713	557.5	-84.4595	2.37e-05	0.68285	45.6	20.96	5.15	843.8	1875
467	04_Yg17_Dq16	40	N	2	2	5	2	0	1	392	19	F	Chinese	N			NA	N	39	39		NA	NA	NA	0.666667	0.515152	0.512821	RDq16	RYg17	RYg17_2504.wav	0.696	763.3	986	222.7	923.7	66.88	763	961	0.4	0.574713	557.5	-84.4595	2.37e-05	0.68285	45.6	20.96	5.15	843.8	1875
468	04_Yg17_Dq16	75	N	2	2	42	2	1	2	805	19	M	Chinese	Y	fruitfly, termites	1.5	NA	N	58	38		NA	NA	NA	0.547619	0.484848	0.461538	RDq16	RYg17	RYg17_2504.wav	0.696	763.3	986	222.7	923.7	66.88	763	961	0.4	0.574713	557.5	-84.4595	2.37e-05	0.68285	45.6	20.96	5.15	843.8	1875
469	04_Yg17_Dq16	12	N	2	4	15	2	1	2	258	21	M	Chinese	N			NA	Y	41	34		NA	NA	NA	0.642857	0.484848	0.410256	RDq16	RYg17	RYg17_2504.wav	0.696	763.3	986	222.7	923.7	66.88	763	961	0.4	0.574713	557.5	-84.4595	2.37e-05	0.68285	45.6	20.96	5.15	843.8	1875
470	04_Yg17_Dq16	61	N	2	4	17	2	1	2	368	19	M	English	N			NA	Y	42	36		43	35	78	0.619048	0.424242	0.461538	RDq16	RYg17	RYg17_2504.wav	0.696	763.3	986	222.7	923.7	66.88	763	961	0.4	0.574713	557.5	-84.4595	2.37e-05	0.68285	45.6	20.96	5.15	843.8	1875
471	04_Yg17_Dq16	8	N	2	1	26	2	1	2	319	19	F	English	Y	dogs, cats	24	NA	Y	58	40		39	43	82	0.595238	0.363636	0.589744	RDq16	RYg17	RYg17_2504.wav	0.696	763.3	986	222.7	923.7	66.88	763	961	0.4	0.574713	557.5	-84.4595	2.37e-05	0.68285	45.6	20.96	5.15	843.8	1875
472	04_Yg17_Dq16	43	N	2	3	42	2	1	2	154	19	M	English	N			NA	Y	37	39		36	40	76	0.595238	0.666667	0.589744	RDq16	RYg17	RYg17_2504.wav	0.696	763.3	986	222.7	923.7	66.88	763	961	0.4	0.574713	557.5	-84.4595	2.37e-05	0.68285	45.6	20.96	5.15	843.8	1875
473	04_Yg17_Dq16	15	N	2	4	2	2	1	2	1547	20	F	English and Chinese	N			NA	Y	58	36	didn't make it to face - just voice	NA	36	NA	0.488095	0.393939	0.461538	RDq16	RYg17	RYg17_2504.wav	0.696	763.3	986	222.7	923.7	66.88	763	961	0.4	0.574713	557.5	-84.4595	2.37e-05	0.68285	45.6	20.96	5.15	843.8	1875
474	04_Yg17_Dq16	114	N	2	1	1	2	0	1	1217	19	M	English	N			NA	Y	58	35		36	38	74	0.607143	0.393939	0.512821	RDq16	RYg17	RYg17_2504.wav	0.696	763.3	986	222.7	923.7	66.88	763	961	0.4	0.574713	557.5	-84.4595	2.37e-05	0.68285	45.6	20.96	5.15	843.8	1875
475	04_Yg17_Dq16	68	N	2	2	13	2	1	2	265	19	M	Spanish	N			NA	N	48	NA	didn't fill out this questionnaire animal	NA	NA	NA	0.607143	0.333333	0.641026	RDq16	RYg17	RYg17_2504.wav	0.696	763.3	986	222.7	923.7	66.88	763	961	0.4	0.574713	557.5	-84.4595	2.37e-05	0.68285	45.6	20.96	5.15	843.8	1875
476	04_Yg17_Dq16	508	Y	2	2	21	2	0	1	1708	40	F	English	Y	Rhesus macaque, pigtail macaque, sooty mangabey	192	120	Y	NA	NA		NA	NA	NA	0.511905	0.969697	0.641026	RDq16	RYg17	RYg17_2504.wav	0.696	763.3	986	222.7	923.7	66.88	763	961	0.4	0.574713	557.5	-84.4595	2.37e-05	0.68285	45.6	20.96	5.15	843.8	1875
477	04_Yg17_Dq16	109	N	2	3	4	2	0	1	360	20	F	English	N			NA	Y	41	33		45	43	88	0.666667	0.727273	0.384615	RDq16	RYg17	RYg17_2504.wav	0.696	763.3	986	222.7	923.7	66.88	763	961	0.4	0.574713	557.5	-84.4595	2.37e-05	0.68285	45.6	20.96	5.15	843.8	1875
478	04_Yg17_Dq16	99	N	2	1	38	2	1	2	357	19	F	English + Hindi	N			NA	Y	56	37		37	39	76	0.595238	0.30303	0.461538	RDq16	RYg17	RYg17_2504.wav	0.696	763.3	986	222.7	923.7	66.88	763	961	0.4	0.574713	557.5	-84.4595	2.37e-05	0.68285	45.6	20.96	5.15	843.8	1875
479	04_Yg17_Dq16	21	N	2	1	28	2	1	2	716	20	F	English	Y	dogs	6	NA	Y	44	37		41	34	75	0.630952	0.787879	0.384615	RDq16	RYg17	RYg17_2504.wav	0.696	763.3	986	222.7	923.7	66.88	763	961	0.4	0.574713	557.5	-84.4595	2.37e-05	0.68285	45.6	20.96	5.15	843.8	1875
480	04_Yg17_Dq16	29	N	2	1	3	2	0	1	412	19	F	English	Y	dogs, cats	3	NA	Y	63	44		47	41	88	0.547619	0.454545	0.512821	RDq16	RYg17	RYg17_2504.wav	0.696	763.3	986	222.7	923.7	66.88	763	961	0.4	0.574713	557.5	-84.4595	2.37e-05	0.68285	45.6	20.96	5.15	843.8	1875
481	04_Yg17_Dq16	510	Y	2	1	22	2	1	2	3802	30	M	English	Y	Rhesus macaque, Sooty mangabey	60	60	Y	NA	NA	asked for more clarification on "intense emotion" ~3 min into task	NA	NA	NA	0.511905	0.727273	0.717949	RDq16	RYg17	RYg17_2504.wav	0.696	763.3	986	222.7	923.7	66.88	763	961	0.4	0.574713	557.5	-84.4595	2.37e-05	0.68285	45.6	20.96	5.15	843.8	1875
482	04_Yg17_Dq16	13	N	2	4	10	2	0	1	240	19	F	English	N			NA	N	21	34		42	41	83	0.5	0.666667	0.487179	RDq16	RYg17	RYg17_2504.wav	0.696	763.3	986	222.7	923.7	66.88	763	961	0.4	0.574713	557.5	-84.4595	2.37e-05	0.68285	45.6	20.96	5.15	843.8	1875
483	04_Yg17_Dq16	24	N	2	2	18	2	1	2	359	20	M	English	N			NA	N	41	24		35	36	71	0.404762	0.363636	0.666667	RDq16	RYg17	RYg17_2504.wav	0.696	763.3	986	222.7	923.7	66.88	763	961	0.4	0.574713	557.5	-84.4595	2.37e-05	0.68285	45.6	20.96	5.15	843.8	1875
484	04_Yg17_Dq16	98	N	2	4	37	2	1	2	373	18	F	English	N			NA	Y	36	39		37	48	85	0.690476	0.393939	0.538462	RDq16	RYg17	RYg17_2504.wav	0.696	763.3	986	222.7	923.7	66.88	763	961	0.4	0.574713	557.5	-84.4595	2.37e-05	0.68285	45.6	20.96	5.15	843.8	1875
485	04_Yg17_Dq16	22	N	2	1	22	2	1	2	450	31	F	English	Y	dogs, cats	6	NA	Y	56	49		47	46	93	0.452381	0.515152	0.692308	RDq16	RYg17	RYg17_2504.wav	0.696	763.3	986	222.7	923.7	66.88	763	961	0.4	0.574713	557.5	-84.4595	2.37e-05	0.68285	45.6	20.96	5.15	843.8	1875
486	04_Yg17_Dq16	100	N	2	3	34	2	1	2	369	21	F	Mandarin	N			NA	Y	50	36		NA	NA	NA	0.619048	0.424242	0.641026	RDq16	RYg17	RYg17_2504.wav	0.696	763.3	986	222.7	923.7	66.88	763	961	0.4	0.574713	557.5	-84.4595	2.37e-05	0.68285	45.6	20.96	5.15	843.8	1875
487	04_Yg17_Dq16	72	N	2	3	37	2	0	1	380	19	F	English	N			NA	Y	48	33		35	31	66	0.511905	0.69697	0.538462	RDq16	RYg17	RYg17_2504.wav	0.696	763.3	986	222.7	923.7	66.88	763	961	0.4	0.574713	557.5	-84.4595	2.37e-05	0.68285	45.6	20.96	5.15	843.8	1875
488	04_Yg17_Dq16	32	N	2	1	24	2	1	2	568	23	F	English	N			NA	N	58	26		34	33	67	0.559524	0.424242	0.435897	RDq16	RYg17	RYg17_2504.wav	0.696	763.3	986	222.7	923.7	66.88	763	961	0.4	0.574713	557.5	-84.4595	2.37e-05	0.68285	45.6	20.96	5.15	843.8	1875
489	04_Yg17_Dq16	48	N	2	1	29	2	1	2	1077	19	F	English	N			NA	Y	33	36		36	46	82	0.654762	0.606061	0.564103	RDq16	RYg17	RYg17_2504.wav	0.696	763.3	986	222.7	923.7	66.88	763	961	0.4	0.574713	557.5	-84.4595	2.37e-05	0.68285	45.6	20.96	5.15	843.8	1875
490	04_Yg17_Dq16	3	N	2	2	6	2	1	2	855	28	M	English	N			NA	Y	39	30		45	42	87	0.559524	0.575758	0.487179	RDq16	RYg17	RYg17_2504.wav	0.696	763.3	986	222.7	923.7	66.88	763	961	0.4	0.574713	557.5	-84.4595	2.37e-05	0.68285	45.6	20.96	5.15	843.8	1875
491	04_Yg17_Dq16	81	N	2	4	6	2	1	2	230	18	F	English	N			NA	Y	53	33		43	51	94	0.690476	0.454545	0.538462	RDq16	RYg17	RYg17_2504.wav	0.696	763.3	986	222.7	923.7	66.88	763	961	0.4	0.574713	557.5	-84.4595	2.37e-05	0.68285	45.6	20.96	5.15	843.8	1875
492	04_Yg17_Dq16	38	N	2	4	10	2	1	2	304	18	F	English	N			NA	Y	57	36		41	41	82	0.619048	0.606061	0.615385	RDq16	RYg17	RYg17_2504.wav	0.696	763.3	986	222.7	923.7	66.88	763	961	0.4	0.574713	557.5	-84.4595	2.37e-05	0.68285	45.6	20.96	5.15	843.8	1875
493	04_Yg17_Dq16	11	N	2	4	16	2	1	2	463	20	F	English (mainly) + Hindi	Y	dogs	6	NA	Y	66	45	noted w/ regard to coos that it is upsetting - sounds like they're in pain. Noted surpirse that screams would be more intense context than coos	34	41	75	0.666667	0.545455	0.641026	RDq16	RYg17	RYg17_2504.wav	0.696	763.3	986	222.7	923.7	66.88	763	961	0.4	0.574713	557.5	-84.4595	2.37e-05	0.68285	45.6	20.96	5.15	843.8	1875
494	04_Yg17_Dq16	39	N	2	3	11	2	1	2	379	19	F	Spanish/English	N			NA	Y	55	38		41	43	84	0.583333	0.454545	0.538462	RDq16	RYg17	RYg17_2504.wav	0.696	763.3	986	222.7	923.7	66.88	763	961	0.4	0.574713	557.5	-84.4595	2.37e-05	0.68285	45.6	20.96	5.15	843.8	1875
495	04_Yg17_Dq16	69	N	2	2	42	2	1	2	607	20	F	English	N			NA	Y	40	37		42	43	85	0.547619	0.424242	0.615385	RDq16	RYg17	RYg17_2504.wav	0.696	763.3	986	222.7	923.7	66.88	763	961	0.4	0.574713	557.5	-84.4595	2.37e-05	0.68285	45.6	20.96	5.15	843.8	1875
496	04_Yg17_Dq16	113	N	2	3	28	2	1	2	584	18	F	English	N			NA	Y	52	38		47	41	88	0.583333	0.848485	0.564103	RDq16	RYg17	RYg17_2504.wav	0.696	763.3	986	222.7	923.7	66.88	763	961	0.4	0.574713	557.5	-84.4595	2.37e-05	0.68285	45.6	20.96	5.15	843.8	1875
497	04_Yg17_Dq16	511	Y	2	1	34	2	1	2	218	24	F	English	Y	Rhesus macaque, domestic cats	24	24	Y	NA	NA		NA	NA	NA	0.571429	0.69697	0.512821	RDq16	RYg17	RYg17_2504.wav	0.696	763.3	986	222.7	923.7	66.88	763	961	0.4	0.574713	557.5	-84.4595	2.37e-05	0.68285	45.6	20.96	5.15	843.8	1875
498	04_Yg17_Dq16	53	N	2	1	12	2	1	2	523	18	F	English	N			NA	N	71	47		22	17	39	0.642857	0.787879	0.641026	RDq16	RYg17	RYg17_2504.wav	0.696	763.3	986	222.7	923.7	66.88	763	961	0.4	0.574713	557.5	-84.4595	2.37e-05	0.68285	45.6	20.96	5.15	843.8	1875
499	04_Yg17_Dq16	107	N	2	4	13	2	0	1	777	22	F	Chinese	N			NA	N	21	37		NA	NA	NA	0.595238	0.424242	0.435897	RDq16	RYg17	RYg17_2504.wav	0.696	763.3	986	222.7	923.7	66.88	763	961	0.4	0.574713	557.5	-84.4595	2.37e-05	0.68285	45.6	20.96	5.15	843.8	1875
500	04_Yg17_Dq16	14	N	2	1	2	2	0	1	442	19	M	English and Mandarin	N			NA	N	43	35		32	39	71	0.642857	0.818182	0.615385	RDq16	RYg17	RYg17_2504.wav	0.696	763.3	986	222.7	923.7	66.88	763	961	0.4	0.574713	557.5	-84.4595	2.37e-05	0.68285	45.6	20.96	5.15	843.8	1875
501	05_Ke17_Gd18	65	N	2	2	6	1	0	2	530	20	F	Arabic	Y			NA	N	36	35		NA	NA	NA	0.559524	0.363636	0.564103	RKw17	RGd18	RKw17_2249.wav	0.514	768.1	1126.9	358.8	1042.6	115.09	768	1100	0.24	0.466926	1495.42	-98.1752	4.69e-05	1.10638	23.56	16.08	3.74	1078.1	1125
502	05_Ke17_Gd18	50	N	2	4	41	1	0	2	314	19	F	English	Y	dogs, cats	12	NA	Y	53	40		24	19	43	0.5	0.212121	0.512821	RKw17	RGd18	RKw17_2249.wav	0.514	768.1	1126.9	358.8	1042.6	115.09	768	1100	0.24	0.466926	1495.42	-98.1752	4.69e-05	1.10638	23.56	16.08	3.74	1078.1	1125
503	05_Ke17_Gd18	88	N	2	1	12	1	0	2	411	19	M	Mandarin	N			NA	Y	49	27		NA	NA	NA	0.547619	0.818182	0.538462	RKw17	RGd18	RKw17_2249.wav	0.514	768.1	1126.9	358.8	1042.6	115.09	768	1100	0.24	0.466926	1495.42	-98.1752	4.69e-05	1.10638	23.56	16.08	3.74	1078.1	1125
504	05_Ke17_Gd18	104	N	2	1	3	1	1	1	1616	19	F	Bangla	N			NA	N	49	31		NA	NA	NA	0.619048	0.363636	0.384615	RKw17	RGd18	RKw17_2249.wav	0.514	768.1	1126.9	358.8	1042.6	115.09	768	1100	0.24	0.466926	1495.42	-98.1752	4.69e-05	1.10638	23.56	16.08	3.74	1078.1	1125
505	05_Ke17_Gd18	25	N	2	3	34	1	0	2	244	21	M	English	N			NA	N	56	32		34	41	75	0.5	0.575758	0.461538	RKw17	RGd18	RKw17_2249.wav	0.514	768.1	1126.9	358.8	1042.6	115.09	768	1100	0.24	0.466926	1495.42	-98.1752	4.69e-05	1.10638	23.56	16.08	3.74	1078.1	1125
506	05_Ke17_Gd18	48	N	2	1	11	1	0	2	1037	19	F	English	N			NA	Y	33	36		36	46	82	0.654762	0.606061	0.564103	RKw17	RGd18	RKw17_2249.wav	0.514	768.1	1126.9	358.8	1042.6	115.09	768	1100	0.24	0.466926	1495.42	-98.1752	4.69e-05	1.10638	23.56	16.08	3.74	1078.1	1125
507	05_Ke17_Gd18	63	N	2	4	15	1	0	2	179	19	F	English	N			NA	N	60	40		44	42	86	0.535714	0	0.717949	RKw17	RGd18	RKw17_2249.wav	0.514	768.1	1126.9	358.8	1042.6	115.09	768	1100	0.24	0.466926	1495.42	-98.1752	4.69e-05	1.10638	23.56	16.08	3.74	1078.1	1125
508	05_Ke17_Gd18	79	N	2	1	3	1	0	2	171	21	M	English	N			NA	Y	55	38		33	34	67	0.571429	0.393939	0.564103	RKw17	RGd18	RKw17_2249.wav	0.514	768.1	1126.9	358.8	1042.6	115.09	768	1100	0.24	0.466926	1495.42	-98.1752	4.69e-05	1.10638	23.56	16.08	3.74	1078.1	1125
509	05_Ke17_Gd18	507	Y	2	1	36	1	0	2	1221	27	F	English	Y	Rhesus macaque, tufted capuchins	60	48	Y	NA	NA		NA	NA	NA	0.547619	1	0.666667	RKw17	RGd18	RKw17_2249.wav	0.514	768.1	1126.9	358.8	1042.6	115.09	768	1100	0.24	0.466926	1495.42	-98.1752	4.69e-05	1.10638	23.56	16.08	3.74	1078.1	1125
510	05_Ke17_Gd18	115	N	2	4	19	1	0	2	412	18	M	Mandarin	N			NA	N	31	37		NA	NA	NA	0.583333	0.575758	0.461538	RKw17	RGd18	RKw17_2249.wav	0.514	768.1	1126.9	358.8	1042.6	115.09	768	1100	0.24	0.466926	1495.42	-98.1752	4.69e-05	1.10638	23.56	16.08	3.74	1078.1	1125
511	05_Ke17_Gd18	101	N	2	4	7	1	0	2	317	19	F	English	Y	mice	11	NA	Y	50	40		43	43	86	0.690476	0.484848	0.487179	RKw17	RGd18	RKw17_2249.wav	0.514	768.1	1126.9	358.8	1042.6	115.09	768	1100	0.24	0.466926	1495.42	-98.1752	4.69e-05	1.10638	23.56	16.08	3.74	1078.1	1125
512	05_Ke17_Gd18	77	N	2	3	14	1	0	2	480	19	M	Chinese	N			NA	Y	46	18		NA	NA	NA	0.595238	0.454545	0.538462	RKw17	RGd18	RKw17_2249.wav	0.514	768.1	1126.9	358.8	1042.6	115.09	768	1100	0.24	0.466926	1495.42	-98.1752	4.69e-05	1.10638	23.56	16.08	3.74	1078.1	1125
513	05_Ke17_Gd18	81	N	2	4	23	1	0	2	264	18	F	English	N			NA	Y	53	33		43	51	94	0.690476	0.454545	0.538462	RKw17	RGd18	RKw17_2249.wav	0.514	768.1	1126.9	358.8	1042.6	115.09	768	1100	0.24	0.466926	1495.42	-98.1752	4.69e-05	1.10638	23.56	16.08	3.74	1078.1	1125
514	05_Ke17_Gd18	111	N	2	3	22	1	1	1	603	21	F	English	N			NA	N	39	39		40	36	76	0.511905	0.575758	0.512821	RKw17	RGd18	RKw17_2249.wav	0.514	768.1	1126.9	358.8	1042.6	115.09	768	1100	0.24	0.466926	1495.42	-98.1752	4.69e-05	1.10638	23.56	16.08	3.74	1078.1	1125
515	05_Ke17_Gd18	35	N	2	1	15	1	1	1	434	19	M	English	N			NA	N	40	21		44	39	83	0.666667	0.818182	0.641026	RKw17	RGd18	RKw17_2249.wav	0.514	768.1	1126.9	358.8	1042.6	115.09	768	1100	0.24	0.466926	1495.42	-98.1752	4.69e-05	1.10638	23.56	16.08	3.74	1078.1	1125
516	05_Ke17_Gd18	17	N	2	2	10	1	0	2	1103	19	F	Chinese	N			NA	Y	49	34		NA	NA	NA	0.595238	1	0.487179	RKw17	RGd18	RKw17_2249.wav	0.514	768.1	1126.9	358.8	1042.6	115.09	768	1100	0.24	0.466926	1495.42	-98.1752	4.69e-05	1.10638	23.56	16.08	3.74	1078.1	1125
517	05_Ke17_Gd18	16	N	2	1	11	1	0	2	194	21	F	English	Y	dogs, cats	6	NA	Y	44	43		38	40	78	0.559524	0.545455	0.461538	RKw17	RGd18	RKw17_2249.wav	0.514	768.1	1126.9	358.8	1042.6	115.09	768	1100	0.24	0.466926	1495.42	-98.1752	4.69e-05	1.10638	23.56	16.08	3.74	1078.1	1125
518	05_Ke17_Gd18	40	N	2	2	35	1	0	2	247	19	F	Chinese	N			NA	N	39	39		NA	NA	NA	0.666667	0.515152	0.512821	RKw17	RGd18	RKw17_2249.wav	0.514	768.1	1126.9	358.8	1042.6	115.09	768	1100	0.24	0.466926	1495.42	-98.1752	4.69e-05	1.10638	23.56	16.08	3.74	1078.1	1125
519	05_Ke17_Gd18	67	N	2	3	15	1	0	2	56	18	F	English	N			NA	N	29	44		32	32	64	0.75	0.636364	0.564103	RKw17	RGd18	RKw17_2249.wav	0.514	768.1	1126.9	358.8	1042.6	115.09	768	1100	0.24	0.466926	1495.42	-98.1752	4.69e-05	1.10638	23.56	16.08	3.74	1078.1	1125
520	05_Ke17_Gd18	44	N	2	1	39	1	0	2	497	31	F	English	N			NA	Y	39	34		47	45	92	0.571429	0.606061	0.333333	RKw17	RGd18	RKw17_2249.wav	0.514	768.1	1126.9	358.8	1042.6	115.09	768	1100	0.24	0.466926	1495.42	-98.1752	4.69e-05	1.10638	23.56	16.08	3.74	1078.1	1125
521	05_Ke17_Gd18	21	N	2	1	32	1	0	2	395	20	F	English	Y	dogs	6	NA	Y	44	37		41	34	75	0.630952	0.787879	0.384615	RKw17	RGd18	RKw17_2249.wav	0.514	768.1	1126.9	358.8	1042.6	115.09	768	1100	0.24	0.466926	1495.42	-98.1752	4.69e-05	1.10638	23.56	16.08	3.74	1078.1	1125
522	05_Ke17_Gd18	51	N	2	1	5	1	1	1	350	18	F	English	N			NA	Y	31	36		45	44	89	0.654762	0.515152	0.615385	RKw17	RGd18	RKw17_2249.wav	0.514	768.1	1126.9	358.8	1042.6	115.09	768	1100	0.24	0.466926	1495.42	-98.1752	4.69e-05	1.10638	23.56	16.08	3.74	1078.1	1125
523	05_Ke17_Gd18	511	Y	2	1	32	1	0	2	232	24	F	English	Y	Rhesus macaque, domestic cats	24	24	Y	NA	NA		NA	NA	NA	0.571429	0.69697	0.512821	RKw17	RGd18	RKw17_2249.wav	0.514	768.1	1126.9	358.8	1042.6	115.09	768	1100	0.24	0.466926	1495.42	-98.1752	4.69e-05	1.10638	23.56	16.08	3.74	1078.1	1125
524	05_Ke17_Gd18	7	N	2	1	40	1	0	2	305	21	F	English	N			NA	Y	49	33		44	43	87	0.583333	0.363636	0.615385	RKw17	RGd18	RKw17_2249.wav	0.514	768.1	1126.9	358.8	1042.6	115.09	768	1100	0.24	0.466926	1495.42	-98.1752	4.69e-05	1.10638	23.56	16.08	3.74	1078.1	1125
525	05_Ke17_Gd18	61	N	2	4	6	1	0	2	362	19	M	English	N			NA	Y	42	36		43	35	78	0.619048	0.424242	0.461538	RKw17	RGd18	RKw17_2249.wav	0.514	768.1	1126.9	358.8	1042.6	115.09	768	1100	0.24	0.466926	1495.42	-98.1752	4.69e-05	1.10638	23.56	16.08	3.74	1078.1	1125
526	05_Ke17_Gd18	14	N	2	1	12	1	0	2	461	19	M	English and Mandarin	N			NA	N	43	35		32	39	71	0.642857	0.818182	0.615385	RKw17	RGd18	RKw17_2249.wav	0.514	768.1	1126.9	358.8	1042.6	115.09	768	1100	0.24	0.466926	1495.42	-98.1752	4.69e-05	1.10638	23.56	16.08	3.74	1078.1	1125
527	05_Ke17_Gd18	78	N	2	2	25	1	0	2	259	20	M	Spanish	Y	dogs, snakes	2	NA	Y	45	35		NA	NA	NA	0.547619	0.424242	0.487179	RKw17	RGd18	RKw17_2249.wav	0.514	768.1	1126.9	358.8	1042.6	115.09	768	1100	0.24	0.466926	1495.42	-98.1752	4.69e-05	1.10638	23.56	16.08	3.74	1078.1	1125
528	05_Ke17_Gd18	37	N	2	2	33	1	0	2	190	19	F	Spanish	N			NA	Y	44	32		NA	NA	NA	0.52381	0.606061	0.641026	RKw17	RGd18	RKw17_2249.wav	0.514	768.1	1126.9	358.8	1042.6	115.09	768	1100	0.24	0.466926	1495.42	-98.1752	4.69e-05	1.10638	23.56	16.08	3.74	1078.1	1125
529	05_Ke17_Gd18	513	Y	2	1	15	1	0	2	461	53	F	English	Y	chimps, bonobos, Rhesus macaque, Sooty mangabeys, pigtail macaque, gibbons, orangutan, stumptail macaques, baboons	288	288	Y	NA	NA		NA	NA	NA	0.535714	0.969697	0.589744	RKw17	RGd18	RKw17_2249.wav	0.514	768.1	1126.9	358.8	1042.6	115.09	768	1100	0.24	0.466926	1495.42	-98.1752	4.69e-05	1.10638	23.56	16.08	3.74	1078.1	1125
530	05_Ke17_Gd18	66	N	2	2	17	1	0	2	3148	20	M	Chinese	N			NA	N	41	38		NA	NA	NA	0.47619	0.69697	0.512821	RKw17	RGd18	RKw17_2249.wav	0.514	768.1	1126.9	358.8	1042.6	115.09	768	1100	0.24	0.466926	1495.42	-98.1752	4.69e-05	1.10638	23.56	16.08	3.74	1078.1	1125
531	05_Ke17_Gd18	57	N	2	4	1	1	1	1	169	20	F	English	N			NA	N	29	31		27	41	68	0.547619	0.333333	0.538462	RKw17	RGd18	RKw17_2249.wav	0.514	768.1	1126.9	358.8	1042.6	115.09	768	1100	0.24	0.466926	1495.42	-98.1752	4.69e-05	1.10638	23.56	16.08	3.74	1078.1	1125
532	05_Ke17_Gd18	15	N	2	4	31	1	0	2	814	20	F	English and Chinese	N			NA	Y	58	36	didn't make it to face - just voice	NA	36	NA	0.488095	0.393939	0.461538	RKw17	RGd18	RKw17_2249.wav	0.514	768.1	1126.9	358.8	1042.6	115.09	768	1100	0.24	0.466926	1495.42	-98.1752	4.69e-05	1.10638	23.56	16.08	3.74	1078.1	1125
533	05_Ke17_Gd18	64	N	2	4	19	1	0	2	199	18	F	English	N			NA	N	55	36		40	42	82	0.654762	0.393939	0.666667	RKw17	RGd18	RKw17_2249.wav	0.514	768.1	1126.9	358.8	1042.6	115.09	768	1100	0.24	0.466926	1495.42	-98.1752	4.69e-05	1.10638	23.56	16.08	3.74	1078.1	1125
534	05_Ke17_Gd18	92	N	2	2	12	1	0	2	45	18	F	English	N			NA	Y	45	30		36	36	72	0.595238	0.212121	0.589744	RKw17	RGd18	RKw17_2249.wav	0.514	768.1	1126.9	358.8	1042.6	115.09	768	1100	0.24	0.466926	1495.42	-98.1752	4.69e-05	1.10638	23.56	16.08	3.74	1078.1	1125
535	05_Ke17_Gd18	74	N	2	4	6	1	1	1	1047	19	F	English	Y	cats, dogs	1	NA	Y	47	41		41	43	84	0.428571	0.272727	0.538462	RKw17	RGd18	RKw17_2249.wav	0.514	768.1	1126.9	358.8	1042.6	115.09	768	1100	0.24	0.466926	1495.42	-98.1752	4.69e-05	1.10638	23.56	16.08	3.74	1078.1	1125
536	05_Ke17_Gd18	18	N	2	2	3	1	0	2	49	20	F	English	N			NA	Y	44	35		32	42	74	0.571429	0.151515	0.333333	RKw17	RGd18	RKw17_2249.wav	0.514	768.1	1126.9	358.8	1042.6	115.09	768	1100	0.24	0.466926	1495.42	-98.1752	4.69e-05	1.10638	23.56	16.08	3.74	1078.1	1125
537	05_Ke17_Gd18	10	N	2	3	34	1	1	1	2939	21	F	English	N			NA	Y	50	38		36	38	74	0.559524	0.757576	0.358974	RKw17	RGd18	RKw17_2249.wav	0.514	768.1	1126.9	358.8	1042.6	115.09	768	1100	0.24	0.466926	1495.42	-98.1752	4.69e-05	1.10638	23.56	16.08	3.74	1078.1	1125
538	05_Ke17_Gd18	109	N	2	3	2	1	1	1	266	20	F	English	N			NA	Y	41	33		45	43	88	0.666667	0.727273	0.384615	RKw17	RGd18	RKw17_2249.wav	0.514	768.1	1126.9	358.8	1042.6	115.09	768	1100	0.24	0.466926	1495.42	-98.1752	4.69e-05	1.10638	23.56	16.08	3.74	1078.1	1125
539	05_Ke17_Gd18	509	Y	2	1	42	1	0	2	351	28	M	Spanish/English	Y	Rhesus macaque, mangabey	48	48	Y	NA	NA		NA	NA	NA	0.464286	0.969697	0.615385	RKw17	RGd18	RKw17_2249.wav	0.514	768.1	1126.9	358.8	1042.6	115.09	768	1100	0.24	0.466926	1495.42	-98.1752	4.69e-05	1.10638	23.56	16.08	3.74	1078.1	1125
540	05_Ke17_Gd18	107	N	2	4	24	1	0	2	1268	22	F	Chinese	N			NA	N	21	37		NA	NA	NA	0.595238	0.424242	0.435897	RKw17	RGd18	RKw17_2249.wav	0.514	768.1	1126.9	358.8	1042.6	115.09	768	1100	0.24	0.466926	1495.42	-98.1752	4.69e-05	1.10638	23.56	16.08	3.74	1078.1	1125
541	05_Ke17_Gd18	502	Y	2	1	11	1	0	2	348	39	F	English	Y	Rhesus, pigrails, gorillas, orangutans, lemurs	216	204	Y	63	30		45	43	88	0.642857	0.909091	0.666667	RKw17	RGd18	RKw17_2249.wav	0.514	768.1	1126.9	358.8	1042.6	115.09	768	1100	0.24	0.466926	1495.42	-98.1752	4.69e-05	1.10638	23.56	16.08	3.74	1078.1	1125
542	05_Ke17_Gd18	53	N	2	1	29	1	0	2	3	18	F	English	N			NA	N	71	47		22	17	39	0.642857	0.787879	0.641026	RKw17	RGd18	RKw17_2249.wav	0.514	768.1	1126.9	358.8	1042.6	115.09	768	1100	0.24	0.466926	1495.42	-98.1752	4.69e-05	1.10638	23.56	16.08	3.74	1078.1	1125
543	05_Ke17_Gd18	105	N	2	2	10	1	0	2	291	19	F	English	N			NA	Y	44	36		40	42	82	0.571429	0.606061	0.435897	RKw17	RGd18	RKw17_2249.wav	0.514	768.1	1126.9	358.8	1042.6	115.09	768	1100	0.24	0.466926	1495.42	-98.1752	4.69e-05	1.10638	23.56	16.08	3.74	1078.1	1125
544	05_Ke17_Gd18	90	N	2	3	13	1	0	2	234	21	M	English	N			NA	N	43	24		42	42	84	0.52381	0.69697	0.641026	RKw17	RGd18	RKw17_2249.wav	0.514	768.1	1126.9	358.8	1042.6	115.09	768	1100	0.24	0.466926	1495.42	-98.1752	4.69e-05	1.10638	23.56	16.08	3.74	1078.1	1125
545	05_Ke17_Gd18	508	Y	2	2	4	1	0	2	1232	40	F	English	Y	Rhesus macaque, pigtail macaque, sooty mangabey	192	120	Y	NA	NA		NA	NA	NA	0.511905	0.969697	0.641026	RKw17	RGd18	RKw17_2249.wav	0.514	768.1	1126.9	358.8	1042.6	115.09	768	1100	0.24	0.466926	1495.42	-98.1752	4.69e-05	1.10638	23.56	16.08	3.74	1078.1	1125
546	05_Ke17_Gd18	82	N	2	2	21	1	0	2	223	18	F	Korean	Y	dogs, cats	3	NA	Y	31	40		NA	NA	NA	0.559524	0.333333	0.641026	RKw17	RGd18	RKw17_2249.wav	0.514	768.1	1126.9	358.8	1042.6	115.09	768	1100	0.24	0.466926	1495.42	-98.1752	4.69e-05	1.10638	23.56	16.08	3.74	1078.1	1125
547	05_Ke17_Gd18	106	N	2	4	37	1	0	2	231	18	F	Korean	N			NA	Y	53	39		NA	NA	NA	0.607143	0.606061	0.461538	RKw17	RGd18	RKw17_2249.wav	0.514	768.1	1126.9	358.8	1042.6	115.09	768	1100	0.24	0.466926	1495.42	-98.1752	4.69e-05	1.10638	23.56	16.08	3.74	1078.1	1125
548	05_Ke17_Gd18	70	N	2	3	5	1	1	1	1808	18	F	English	N			NA	Y	62	34		48	45	93	0.52381	0.242424	0.384615	RKw17	RGd18	RKw17_2249.wav	0.514	768.1	1126.9	358.8	1042.6	115.09	768	1100	0.24	0.466926	1495.42	-98.1752	4.69e-05	1.10638	23.56	16.08	3.74	1078.1	1125
549	05_Ke17_Gd18	38	N	2	4	25	1	0	2	250	18	F	English	N			NA	Y	57	36		41	41	82	0.619048	0.606061	0.615385	RKw17	RGd18	RKw17_2249.wav	0.514	768.1	1126.9	358.8	1042.6	115.09	768	1100	0.24	0.466926	1495.42	-98.1752	4.69e-05	1.10638	23.56	16.08	3.74	1078.1	1125
550	05_Ke17_Gd18	31	N	2	4	30	1	0	2	658	18	F	English	N			NA	Y	47	35		38	40	78	0.583333	0.575758	0.384615	RKw17	RGd18	RKw17_2249.wav	0.514	768.1	1126.9	358.8	1042.6	115.09	768	1100	0.24	0.466926	1495.42	-98.1752	4.69e-05	1.10638	23.56	16.08	3.74	1078.1	1125
551	05_Ke17_Gd18	28	N	2	2	16	1	0	2	836	40	F	English	N			NA	Y	50	33		42	NA	NA	0.630952	0.606061	0.564103	RKw17	RGd18	RKw17_2249.wav	0.514	768.1	1126.9	358.8	1042.6	115.09	768	1100	0.24	0.466926	1495.42	-98.1752	4.69e-05	1.10638	23.56	16.08	3.74	1078.1	1125
552	05_Ke17_Gd18	9	N	2	1	30	1	0	2	326	19	M	English	Y	dogs, cats	3	NA	Y	41	31		35	32	67	0.416667	0.121212	0.435897	RKw17	RGd18	RKw17_2249.wav	0.514	768.1	1126.9	358.8	1042.6	115.09	768	1100	0.24	0.466926	1495.42	-98.1752	4.69e-05	1.10638	23.56	16.08	3.74	1078.1	1125
553	05_Ke17_Gd18	49	N	2	4	29	1	0	2	362	18	F	English	N			NA	N	44	28		42	2	44	0.642857	0.454545	0.487179	RKw17	RGd18	RKw17_2249.wav	0.514	768.1	1126.9	358.8	1042.6	115.09	768	1100	0.24	0.466926	1495.42	-98.1752	4.69e-05	1.10638	23.56	16.08	3.74	1078.1	1125
554	05_Ke17_Gd18	4	N	2	3	6	1	1	1	85	20	M	English	N			NA	N	43	38		27	24	51	0.559524	0.424242	0.589744	RKw17	RGd18	RKw17_2249.wav	0.514	768.1	1126.9	358.8	1042.6	115.09	768	1100	0.24	0.466926	1495.42	-98.1752	4.69e-05	1.10638	23.56	16.08	3.74	1078.1	1125
555	05_Ke17_Gd18	59	N	2	1	21	1	0	2	389	18	M	Gujarati	N			NA	N	37	38		NA	NA	NA	0.52381	0.393939	0.666667	RKw17	RGd18	RKw17_2249.wav	0.514	768.1	1126.9	358.8	1042.6	115.09	768	1100	0.24	0.466926	1495.42	-98.1752	4.69e-05	1.10638	23.56	16.08	3.74	1078.1	1125
556	05_Ke17_Gd18	42	N	2	2	13	1	0	2	211	19	F	English	N			NA	N	35	28		44	44	88	0.571429	0.454545	0.692308	RKw17	RGd18	RKw17_2249.wav	0.514	768.1	1126.9	358.8	1042.6	115.09	768	1100	0.24	0.466926	1495.42	-98.1752	4.69e-05	1.10638	23.56	16.08	3.74	1078.1	1125
557	05_Ke17_Gd18	86	N	2	1	42	1	0	2	224	22	M	Chinese	N			NA	Y	44	35		NA	NA	NA	0.666667	0.515152	0.641026	RKw17	RGd18	RKw17_2249.wav	0.514	768.1	1126.9	358.8	1042.6	115.09	768	1100	0.24	0.466926	1495.42	-98.1752	4.69e-05	1.10638	23.56	16.08	3.74	1078.1	1125
558	05_Ke17_Gd18	3	N	2	2	41	1	0	2	371	28	M	English	N			NA	Y	39	30		45	42	87	0.559524	0.575758	0.487179	RKw17	RGd18	RKw17_2249.wav	0.514	768.1	1126.9	358.8	1042.6	115.09	768	1100	0.24	0.466926	1495.42	-98.1752	4.69e-05	1.10638	23.56	16.08	3.74	1078.1	1125
559	05_Ke17_Gd18	100	N	2	3	38	1	0	2	751	21	F	Mandarin	N			NA	Y	50	36		NA	NA	NA	0.619048	0.424242	0.641026	RKw17	RGd18	RKw17_2249.wav	0.514	768.1	1126.9	358.8	1042.6	115.09	768	1100	0.24	0.466926	1495.42	-98.1752	4.69e-05	1.10638	23.56	16.08	3.74	1078.1	1125
560	05_Ke17_Gd18	29	N	2	1	1	1	0	2	606	19	F	English	Y	dogs, cats	3	NA	Y	63	44		47	41	88	0.547619	0.454545	0.512821	RKw17	RGd18	RKw17_2249.wav	0.514	768.1	1126.9	358.8	1042.6	115.09	768	1100	0.24	0.466926	1495.42	-98.1752	4.69e-05	1.10638	23.56	16.08	3.74	1078.1	1125
561	05_Ke17_Gd18	505	Y	2	2	33	1	0	2	3750	30	F	English	Y	Rhesus macaque, horses, dogs, cats, birds, mangabey	120	94	Y	NA	NA		NA	NA	NA	0.595238	1	0.589744	RKw17	RGd18	RKw17_2249.wav	0.514	768.1	1126.9	358.8	1042.6	115.09	768	1100	0.24	0.466926	1495.42	-98.1752	4.69e-05	1.10638	23.56	16.08	3.74	1078.1	1125
562	05_Ke17_Gd18	27	N	2	4	8	1	1	1	5512	23	F	Telugu	N			NA	N	32	44		NA	NA	NA	0.547619	0.151515	0.512821	RKw17	RGd18	RKw17_2249.wav	0.514	768.1	1126.9	358.8	1042.6	115.09	768	1100	0.24	0.466926	1495.42	-98.1752	4.69e-05	1.10638	23.56	16.08	3.74	1078.1	1125
563	05_Ke17_Gd18	76	N	2	4	25	1	0	2	1976	19	F	Chinese	N			NA	Y	41	41		NA	NA	NA	0.630952	0.393939	0.538462	RKw17	RGd18	RKw17_2249.wav	0.514	768.1	1126.9	358.8	1042.6	115.09	768	1100	0.24	0.466926	1495.42	-98.1752	4.69e-05	1.10638	23.56	16.08	3.74	1078.1	1125
564	05_Ke17_Gd18	85	N	2	1	19	1	0	2	569	19	F	Chinese	N			NA	Y	25	32		NA	NA	NA	0.571429	0.363636	0.435897	RKw17	RGd18	RKw17_2249.wav	0.514	768.1	1126.9	358.8	1042.6	115.09	768	1100	0.24	0.466926	1495.42	-98.1752	4.69e-05	1.10638	23.56	16.08	3.74	1078.1	1125
565	05_Ke17_Gd18	97	N	2	4	1	1	0	2	432	19	F	English	N			NA	Y	48	28		40	43	83	0.595238	0.606061	0.487179	RKw17	RGd18	RKw17_2249.wav	0.514	768.1	1126.9	358.8	1042.6	115.09	768	1100	0.24	0.466926	1495.42	-98.1752	4.69e-05	1.10638	23.56	16.08	3.74	1078.1	1125
566	05_Ke17_Gd18	52	N	2	2	7	1	0	2	228	19	F	English	N			NA	Y	55	38		42	43	85	0.619048	0.393939	0.512821	RKw17	RGd18	RKw17_2249.wav	0.514	768.1	1126.9	358.8	1042.6	115.09	768	1100	0.24	0.466926	1495.42	-98.1752	4.69e-05	1.10638	23.56	16.08	3.74	1078.1	1125
567	05_Ke17_Gd18	23	N	2	3	27	1	0	2	520	20	F	Mandarin	N			NA	N	38	33		NA	NA	NA	0.52381	0.575758	0.564103	RKw17	RGd18	RKw17_2249.wav	0.514	768.1	1126.9	358.8	1042.6	115.09	768	1100	0.24	0.466926	1495.42	-98.1752	4.69e-05	1.10638	23.56	16.08	3.74	1078.1	1125
568	05_Ke17_Gd18	56	N	2	2	15	1	0	2	1707	18	F	Chinese	N			NA	Y	31	30		NA	NA	NA	0.595238	0.575758	0.384615	RKw17	RGd18	RKw17_2249.wav	0.514	768.1	1126.9	358.8	1042.6	115.09	768	1100	0.24	0.466926	1495.42	-98.1752	4.69e-05	1.10638	23.56	16.08	3.74	1078.1	1125
569	05_Ke17_Gd18	39	N	2	3	36	1	0	2	239	19	F	Spanish/English	N			NA	Y	55	38		41	43	84	0.583333	0.454545	0.538462	RKw17	RGd18	RKw17_2249.wav	0.514	768.1	1126.9	358.8	1042.6	115.09	768	1100	0.24	0.466926	1495.42	-98.1752	4.69e-05	1.10638	23.56	16.08	3.74	1078.1	1125
570	05_Ke17_Gd18	30	N	2	1	37	1	0	2	179	19	F	Chinese	N			NA	N	43	31		NA	NA	NA	0.535714	0.151515	0.641026	RKw17	RGd18	RKw17_2249.wav	0.514	768.1	1126.9	358.8	1042.6	115.09	768	1100	0.24	0.466926	1495.42	-98.1752	4.69e-05	1.10638	23.56	16.08	3.74	1078.1	1125
571	05_Ke17_Gd18	108	N	2	2	1	1	1	1	912	19	M	English	N			NA	N	59	24		45	43	88	0.571429	0.393939	0.435897	RKw17	RGd18	RKw17_2249.wav	0.514	768.1	1126.9	358.8	1042.6	115.09	768	1100	0.24	0.466926	1495.42	-98.1752	4.69e-05	1.10638	23.56	16.08	3.74	1078.1	1125
572	05_Ke17_Gd18	24	N	2	2	22	1	0	2	302	20	M	English	N			NA	N	41	24		35	36	71	0.404762	0.363636	0.666667	RKw17	RGd18	RKw17_2249.wav	0.514	768.1	1126.9	358.8	1042.6	115.09	768	1100	0.24	0.466926	1495.42	-98.1752	4.69e-05	1.10638	23.56	16.08	3.74	1078.1	1125
573	05_Ke17_Gd18	69	N	2	2	8	1	0	2	264	20	F	English	N			NA	Y	40	37		42	43	85	0.547619	0.424242	0.615385	RKw17	RGd18	RKw17_2249.wav	0.514	768.1	1126.9	358.8	1042.6	115.09	768	1100	0.24	0.466926	1495.42	-98.1752	4.69e-05	1.10638	23.56	16.08	3.74	1078.1	1125
574	05_Ke17_Gd18	8	N	2	1	18	1	0	2	1614	19	F	English	Y	dogs, cats	24	NA	Y	58	40		39	43	82	0.595238	0.363636	0.589744	RKw17	RGd18	RKw17_2249.wav	0.514	768.1	1126.9	358.8	1042.6	115.09	768	1100	0.24	0.466926	1495.42	-98.1752	4.69e-05	1.10638	23.56	16.08	3.74	1078.1	1125
575	05_Ke17_Gd18	33	N	2	2	37	1	0	2	196	19	F	Mandarin + English	N			NA	Y	56	33		NA	NA	NA	0.571429	0.272727	0.615385	RKw17	RGd18	RKw17_2249.wav	0.514	768.1	1126.9	358.8	1042.6	115.09	768	1100	0.24	0.466926	1495.42	-98.1752	4.69e-05	1.10638	23.56	16.08	3.74	1078.1	1125
576	05_Ke17_Gd18	68	N	2	2	22	1	0	2	315	19	M	Spanish	N			NA	N	48	NA	didn't fill out this questionnaire animal	NA	NA	NA	0.607143	0.333333	0.641026	RKw17	RGd18	RKw17_2249.wav	0.514	768.1	1126.9	358.8	1042.6	115.09	768	1100	0.24	0.466926	1495.42	-98.1752	4.69e-05	1.10638	23.56	16.08	3.74	1078.1	1125
577	05_Ke17_Gd18	110	N	2	1	38	1	0	2	487	19	M	English	N			NA	Y	40	32		35	38	73	0.511905	0.69697	0.564103	RKw17	RGd18	RKw17_2249.wav	0.514	768.1	1126.9	358.8	1042.6	115.09	768	1100	0.24	0.466926	1495.42	-98.1752	4.69e-05	1.10638	23.56	16.08	3.74	1078.1	1125
578	05_Ke17_Gd18	22	N	2	1	18	1	0	2	1361	31	F	English	Y	dogs, cats	6	NA	Y	56	49		47	46	93	0.452381	0.515152	0.692308	RKw17	RGd18	RKw17_2249.wav	0.514	768.1	1126.9	358.8	1042.6	115.09	768	1100	0.24	0.466926	1495.42	-98.1752	4.69e-05	1.10638	23.56	16.08	3.74	1078.1	1125
579	05_Ke17_Gd18	46	N	2	3	37	1	0	2	286	18	F	English	N			NA	Y	45	25		39	42	81	0.619048	0.515152	0.589744	RKw17	RGd18	RKw17_2249.wav	0.514	768.1	1126.9	358.8	1042.6	115.09	768	1100	0.24	0.466926	1495.42	-98.1752	4.69e-05	1.10638	23.56	16.08	3.74	1078.1	1125
580	05_Ke17_Gd18	89	N	2	1	35	1	0	2	500	18	F	Spanish	N			NA	Y	50	37		NA	NA	NA	0.619048	0.818182	0.589744	RKw17	RGd18	RKw17_2249.wav	0.514	768.1	1126.9	358.8	1042.6	115.09	768	1100	0.24	0.466926	1495.42	-98.1752	4.69e-05	1.10638	23.56	16.08	3.74	1078.1	1125
581	05_Ke17_Gd18	84	N	2	3	20	1	0	2	621	19	F	English	N			NA	Y	34	36		35	37	72	0.547619	0.575758	0.512821	RKw17	RGd18	RKw17_2249.wav	0.514	768.1	1126.9	358.8	1042.6	115.09	768	1100	0.24	0.466926	1495.42	-98.1752	4.69e-05	1.10638	23.56	16.08	3.74	1078.1	1125
582	05_Ke17_Gd18	71	N	2	2	12	1	0	2	475	19	M	English	N			NA	Y	44	36		43	43	86	0.595238	0.424242	0.333333	RKw17	RGd18	RKw17_2249.wav	0.514	768.1	1126.9	358.8	1042.6	115.09	768	1100	0.24	0.466926	1495.42	-98.1752	4.69e-05	1.10638	23.56	16.08	3.74	1078.1	1125
583	05_Ke17_Gd18	43	N	2	3	12	1	0	2	2222	19	M	English	N			NA	Y	37	39		36	40	76	0.595238	0.666667	0.589744	RKw17	RGd18	RKw17_2249.wav	0.514	768.1	1126.9	358.8	1042.6	115.09	768	1100	0.24	0.466926	1495.42	-98.1752	4.69e-05	1.10638	23.56	16.08	3.74	1078.1	1125
584	05_Ke17_Gd18	60	N	2	2	41	1	0	2	363	18	F	Chinese	N			NA	Y	54	33		NA	NA	NA	0.595238	0.69697	0.615385	RKw17	RGd18	RKw17_2249.wav	0.514	768.1	1126.9	358.8	1042.6	115.09	768	1100	0.24	0.466926	1495.42	-98.1752	4.69e-05	1.10638	23.56	16.08	3.74	1078.1	1125
585	05_Ke17_Gd18	41	N	2	4	4	1	0	2	25	20	M	Vietnamese	N			NA	Y	45	29		NA	NA	NA	0.630952	0.454545	0.435897	RKw17	RGd18	RKw17_2249.wav	0.514	768.1	1126.9	358.8	1042.6	115.09	768	1100	0.24	0.466926	1495.42	-98.1752	4.69e-05	1.10638	23.56	16.08	3.74	1078.1	1125
586	05_Ke17_Gd18	114	N	2	1	28	1	0	2	681	19	M	English	N			NA	Y	58	35		36	38	74	0.607143	0.393939	0.512821	RKw17	RGd18	RKw17_2249.wav	0.514	768.1	1126.9	358.8	1042.6	115.09	768	1100	0.24	0.466926	1495.42	-98.1752	4.69e-05	1.10638	23.56	16.08	3.74	1078.1	1125
587	05_Ke17_Gd18	102	N	2	1	24	1	0	2	417	18	F	English	Y	elephants, dogs, tortoises	3	NA	Y	46	44		33	36	69	0.559524	0.424242	0.461538	RKw17	RGd18	RKw17_2249.wav	0.514	768.1	1126.9	358.8	1042.6	115.09	768	1100	0.24	0.466926	1495.42	-98.1752	4.69e-05	1.10638	23.56	16.08	3.74	1078.1	1125
588	05_Ke17_Gd18	93	N	2	1	15	1	0	2	494	19	F	English	N			NA	Y	53	37		38	38	76	0.52381	0.30303	0.487179	RKw17	RGd18	RKw17_2249.wav	0.514	768.1	1126.9	358.8	1042.6	115.09	768	1100	0.24	0.466926	1495.42	-98.1752	4.69e-05	1.10638	23.56	16.08	3.74	1078.1	1125
589	05_Ke17_Gd18	87	N	2	4	31	1	0	2	234	19	F	Korean	N			NA	Y	53	41		NA	NA	NA	0.654762	0.787879	0.615385	RKw17	RGd18	RKw17_2249.wav	0.514	768.1	1126.9	358.8	1042.6	115.09	768	1100	0.24	0.466926	1495.42	-98.1752	4.69e-05	1.10638	23.56	16.08	3.74	1078.1	1125
590	05_Ke17_Gd18	73	N	2	1	29	1	0	2	26	19	F	English and Chinese	N			NA	Y	41	37		34	36	70	0.571429	0.575758	0.538462	RKw17	RGd18	RKw17_2249.wav	0.514	768.1	1126.9	358.8	1042.6	115.09	768	1100	0.24	0.466926	1495.42	-98.1752	4.69e-05	1.10638	23.56	16.08	3.74	1078.1	1125
591	05_Ke17_Gd18	13	N	2	4	15	1	0	2	1167	19	F	English	N			NA	N	21	34		42	41	83	0.5	0.666667	0.487179	RKw17	RGd18	RKw17_2249.wav	0.514	768.1	1126.9	358.8	1042.6	115.09	768	1100	0.24	0.466926	1495.42	-98.1752	4.69e-05	1.10638	23.56	16.08	3.74	1078.1	1125
592	05_Ke17_Gd18	94	N	2	2	29	1	0	2	214	20	F	English	N			NA	Y	45	44		40	44	84	0.72619	0.878788	0.410256	RKw17	RGd18	RKw17_2249.wav	0.514	768.1	1126.9	358.8	1042.6	115.09	768	1100	0.24	0.466926	1495.42	-98.1752	4.69e-05	1.10638	23.56	16.08	3.74	1078.1	1125
593	05_Ke17_Gd18	103	N	2	4	16	1	0	2	328	19	F	Korean + English	Y	dogs, cats	3	NA	Y	47	39		40	41	81	0.52381	0.393939	0.512821	RKw17	RGd18	RKw17_2249.wav	0.514	768.1	1126.9	358.8	1042.6	115.09	768	1100	0.24	0.466926	1495.42	-98.1752	4.69e-05	1.10638	23.56	16.08	3.74	1078.1	1125
594	05_Ke17_Gd18	72	N	2	3	4	1	0	2	91	19	F	English	N			NA	Y	48	33		35	31	66	0.511905	0.69697	0.538462	RKw17	RGd18	RKw17_2249.wav	0.514	768.1	1126.9	358.8	1042.6	115.09	768	1100	0.24	0.466926	1495.42	-98.1752	4.69e-05	1.10638	23.56	16.08	3.74	1078.1	1125
595	05_Ke17_Gd18	2	N	2	3	41	1	0	2	254	19	F	English	N			NA	Y	49	42		36	37	73	0.595238	0.0606061	0.641026	RKw17	RGd18	RKw17_2249.wav	0.514	768.1	1126.9	358.8	1042.6	115.09	768	1100	0.24	0.466926	1495.42	-98.1752	4.69e-05	1.10638	23.56	16.08	3.74	1078.1	1125
596	05_Ke17_Gd18	95	N	2	2	4	1	0	2	419	20	F	English	N			NA	Y	57	30		39	44	83	0.571429	0.363636	0.564103	RKw17	RGd18	RKw17_2249.wav	0.514	768.1	1126.9	358.8	1042.6	115.09	768	1100	0.24	0.466926	1495.42	-98.1752	4.69e-05	1.10638	23.56	16.08	3.74	1078.1	1125
597	05_Ke17_Gd18	99	N	2	1	34	1	0	2	238	19	F	English + Hindi	N			NA	Y	56	37		37	39	76	0.595238	0.30303	0.461538	RKw17	RGd18	RKw17_2249.wav	0.514	768.1	1126.9	358.8	1042.6	115.09	768	1100	0.24	0.466926	1495.42	-98.1752	4.69e-05	1.10638	23.56	16.08	3.74	1078.1	1125
598	05_Ke17_Gd18	83	N	2	3	15	1	0	2	272	19	F	English	N			NA	Y	55	46		48	46	94	0.5	0.333333	0.487179	RKw17	RGd18	RKw17_2249.wav	0.514	768.1	1126.9	358.8	1042.6	115.09	768	1100	0.24	0.466926	1495.42	-98.1752	4.69e-05	1.10638	23.56	16.08	3.74	1078.1	1125
599	05_Ke17_Gd18	6	N	2	1	27	1	0	2	297	23	M	English	Y	mice	3	NA	Y	31	28		38	41	79	0.595238	0.484848	0.589744	RKw17	RGd18	RKw17_2249.wav	0.514	768.1	1126.9	358.8	1042.6	115.09	768	1100	0.24	0.466926	1495.42	-98.1752	4.69e-05	1.10638	23.56	16.08	3.74	1078.1	1125
600	05_Ke17_Gd18	26	N	2	1	19	1	0	2	453	24	M	Telugu	N			NA	N	41	35		NA	NA	NA	0.607143	0.515152	0.538462	RKw17	RGd18	RKw17_2249.wav	0.514	768.1	1126.9	358.8	1042.6	115.09	768	1100	0.24	0.466926	1495.42	-98.1752	4.69e-05	1.10638	23.56	16.08	3.74	1078.1	1125
601	05_Ke17_Gd18	112	N	2	2	33	1	0	2	3842	18	M	Turkish	N			NA	Y	55	40		NA	NA	NA	0.535714	0.424242	0.461538	RKw17	RGd18	RKw17_2249.wav	0.514	768.1	1126.9	358.8	1042.6	115.09	768	1100	0.24	0.466926	1495.42	-98.1752	4.69e-05	1.10638	23.56	16.08	3.74	1078.1	1125
602	05_Ke17_Gd18	62	N	2	4	20	1	0	2	237	18	F	English	Y	mice	1	NA	Y	59	32		46	40	86	0.559524	0.484848	0.538462	RKw17	RGd18	RKw17_2249.wav	0.514	768.1	1126.9	358.8	1042.6	115.09	768	1100	0.24	0.466926	1495.42	-98.1752	4.69e-05	1.10638	23.56	16.08	3.74	1078.1	1125
603	05_Ke17_Gd18	19	N	2	3	38	1	0	2	288	51	F	English	Y	mice	240	NA	Y	36	29		43	47	90	0.511905	0.575758	0.487179	RKw17	RGd18	RKw17_2249.wav	0.514	768.1	1126.9	358.8	1042.6	115.09	768	1100	0.24	0.466926	1495.42	-98.1752	4.69e-05	1.10638	23.56	16.08	3.74	1078.1	1125
604	05_Ke17_Gd18	32	N	2	1	29	1	0	2	688	23	F	English	N			NA	N	58	26		34	33	67	0.559524	0.424242	0.435897	RKw17	RGd18	RKw17_2249.wav	0.514	768.1	1126.9	358.8	1042.6	115.09	768	1100	0.24	0.466926	1495.42	-98.1752	4.69e-05	1.10638	23.56	16.08	3.74	1078.1	1125
605	05_Ke17_Gd18	20	Y	2	2	34	1	1	1	685	37	F	English	Y	Rhesus, chimpanzees, dogs, cats, mice, rats	180	132	Y	52	33		46	47	93	0.392857	0.454545	0.589744	RKw17	RGd18	RKw17_2249.wav	0.514	768.1	1126.9	358.8	1042.6	115.09	768	1100	0.24	0.466926	1495.42	-98.1752	4.69e-05	1.10638	23.56	16.08	3.74	1078.1	1125
606	05_Ke17_Gd18	1	N	2	1	16	1	0	2	881	20	F	English	Y	cats, dogs	12	NA	Y	38	33		NA	40	NA	0.642857	0.333333	0.564103	RKw17	RGd18	RKw17_2249.wav	0.514	768.1	1126.9	358.8	1042.6	115.09	768	1100	0.24	0.466926	1495.42	-98.1752	4.69e-05	1.10638	23.56	16.08	3.74	1078.1	1125
607	05_Ke17_Gd18	91	N	2	1	19	1	1	1	214	20	F	Chinese	N			NA	N	49	36		NA	NA	NA	0.547619	0.606061	0.641026	RKw17	RGd18	RKw17_2249.wav	0.514	768.1	1126.9	358.8	1042.6	115.09	768	1100	0.24	0.466926	1495.42	-98.1752	4.69e-05	1.10638	23.56	16.08	3.74	1078.1	1125
608	05_Ke17_Gd18	55	N	2	4	41	1	0	2	185	18	F	Mandarin	N			NA	Y	64	30		NA	NA	NA	0.690476	0.515152	0.410256	RKw17	RGd18	RKw17_2249.wav	0.514	768.1	1126.9	358.8	1042.6	115.09	768	1100	0.24	0.466926	1495.42	-98.1752	4.69e-05	1.10638	23.56	16.08	3.74	1078.1	1125
609	05_Ke17_Gd18	506	Y	2	2	12	1	0	2	129	37	F	English	Y	Rhesus macaque	120	120	Y	NA	NA		NA	NA	NA	0.559524	0.424242	0.487179	RKw17	RGd18	RKw17_2249.wav	0.514	768.1	1126.9	358.8	1042.6	115.09	768	1100	0.24	0.466926	1495.42	-98.1752	4.69e-05	1.10638	23.56	16.08	3.74	1078.1	1125
610	05_Ke17_Gd18	54	N	2	1	5	1	1	1	474	18	F	Chinese	N			NA	N	35	41		NA	NA	NA	0.535714	0.424242	0.538462	RKw17	RGd18	RKw17_2249.wav	0.514	768.1	1126.9	358.8	1042.6	115.09	768	1100	0.24	0.466926	1495.42	-98.1752	4.69e-05	1.10638	23.56	16.08	3.74	1078.1	1125
611	05_Ke17_Gd18	47	N	2	3	27	1	0	2	230	18	F	English	N			NA	Y	60	42		42	45	87	0.47619	0.30303	0.333333	RKw17	RGd18	RKw17_2249.wav	0.514	768.1	1126.9	358.8	1042.6	115.09	768	1100	0.24	0.466926	1495.42	-98.1752	4.69e-05	1.10638	23.56	16.08	3.74	1078.1	1125
612	05_Ke17_Gd18	98	N	2	4	6	1	0	2	217	18	F	English	N			NA	Y	36	39		37	48	85	0.690476	0.393939	0.538462	RKw17	RGd18	RKw17_2249.wav	0.514	768.1	1126.9	358.8	1042.6	115.09	768	1100	0.24	0.466926	1495.42	-98.1752	4.69e-05	1.10638	23.56	16.08	3.74	1078.1	1125
613	05_Ke17_Gd18	501	Y	2	4	19	1	0	2	284	26	M	English	Y	lemurs (black white ruffed, ringtail, red bellied, crown, mongoose), Rhesus monkeys, gorillas, orangutans	Lemur: 24, Rh: 48, Gorilla: 12, Orangutan: 12	48	Y	47	37		46	44	90	0.559524	0.69697	0.461538	RKw17	RGd18	RKw17_2249.wav	0.514	768.1	1126.9	358.8	1042.6	115.09	768	1100	0.24	0.466926	1495.42	-98.1752	4.69e-05	1.10638	23.56	16.08	3.74	1078.1	1125
614	05_Ke17_Gd18	96	N	2	1	42	1	0	2	206	18	F	English	N			NA	Y	59	39		44	47	91	0.583333	0.727273	0.512821	RKw17	RGd18	RKw17_2249.wav	0.514	768.1	1126.9	358.8	1042.6	115.09	768	1100	0.24	0.466926	1495.42	-98.1752	4.69e-05	1.10638	23.56	16.08	3.74	1078.1	1125
615	05_Ke17_Gd18	80	N	2	4	10	1	0	2	74	18	F	English	N			NA	Y	57	34		36	3	39	0.607143	0.545455	0.358974	RKw17	RGd18	RKw17_2249.wav	0.514	768.1	1126.9	358.8	1042.6	115.09	768	1100	0.24	0.466926	1495.42	-98.1752	4.69e-05	1.10638	23.56	16.08	3.74	1078.1	1125
616	05_Ke17_Gd18	36	N	2	3	27	1	0	2	591	19	F	English	Y	dogs, cats	4	NA	Y	53	31		42	42	84	0.416667	0.606061	0.435897	RKw17	RGd18	RKw17_2249.wav	0.514	768.1	1126.9	358.8	1042.6	115.09	768	1100	0.24	0.466926	1495.42	-98.1752	4.69e-05	1.10638	23.56	16.08	3.74	1078.1	1125
617	05_Ke17_Gd18	5	N	2	3	31	1	0	2	129	29	F	English	Y	cat, dog, horse, cow	6+ years	NA	Y	41	35		46	49	95	0.583333	0.393939	0.564103	RKw17	RGd18	RKw17_2249.wav	0.514	768.1	1126.9	358.8	1042.6	115.09	768	1100	0.24	0.466926	1495.42	-98.1752	4.69e-05	1.10638	23.56	16.08	3.74	1078.1	1125
618	05_Ke17_Gd18	34	N	2	3	19	1	1	1	249	24	M	Mandarin	N			NA	N	15	37		NA	NA	NA	0.511905	0.757576	0.282051	RKw17	RGd18	RKw17_2249.wav	0.514	768.1	1126.9	358.8	1042.6	115.09	768	1100	0.24	0.466926	1495.42	-98.1752	4.69e-05	1.10638	23.56	16.08	3.74	1078.1	1125
619	05_Ke17_Gd18	512	Y	2	2	41	1	0	2	742	39	M	English	Y	Rhesus macaque, pigtail macaque, common chimpanzee, west lowland gorilla, Sooty mangabey	144	144	Y	NA	NA	occasionally needed to answer radio during task	NA	NA	NA	0.642857	1	0.589744	RKw17	RGd18	RKw17_2249.wav	0.514	768.1	1126.9	358.8	1042.6	115.09	768	1100	0.24	0.466926	1495.42	-98.1752	4.69e-05	1.10638	23.56	16.08	3.74	1078.1	1125
620	05_Ke17_Gd18	12	N	2	4	11	1	0	2	844	21	M	Chinese	N			NA	Y	41	34		NA	NA	NA	0.642857	0.484848	0.410256	RKw17	RGd18	RKw17_2249.wav	0.514	768.1	1126.9	358.8	1042.6	115.09	768	1100	0.24	0.466926	1495.42	-98.1752	4.69e-05	1.10638	23.56	16.08	3.74	1078.1	1125
621	05_Ke17_Gd18	113	N	2	3	24	1	0	2	2990	18	F	English	N			NA	Y	52	38		47	41	88	0.583333	0.848485	0.564103	RKw17	RGd18	RKw17_2249.wav	0.514	768.1	1126.9	358.8	1042.6	115.09	768	1100	0.24	0.466926	1495.42	-98.1752	4.69e-05	1.10638	23.56	16.08	3.74	1078.1	1125
622	05_Ke17_Gd18	75	N	2	2	30	1	0	2	444	19	M	Chinese	Y	fruitfly, termites	1.5	NA	N	58	38		NA	NA	NA	0.547619	0.484848	0.461538	RKw17	RGd18	RKw17_2249.wav	0.514	768.1	1126.9	358.8	1042.6	115.09	768	1100	0.24	0.466926	1495.42	-98.1752	4.69e-05	1.10638	23.56	16.08	3.74	1078.1	1125
623	05_Ke17_Gd18	510	Y	2	1	39	1	0	2	421	30	M	English	Y	Rhesus macaque, Sooty mangabey	60	60	Y	NA	NA	asked for more clarification on "intense emotion" ~3 min into task	NA	NA	NA	0.511905	0.727273	0.717949	RKw17	RGd18	RKw17_2249.wav	0.514	768.1	1126.9	358.8	1042.6	115.09	768	1100	0.24	0.466926	1495.42	-98.1752	4.69e-05	1.10638	23.56	16.08	3.74	1078.1	1125
624	05_Ke17_Gd18	58	N	2	1	30	1	0	2	509	21	F	Spanish	Y	mice, rats	2	NA	Y	53	33		NA	NA	NA	0.547619	0.515152	0.461538	RKw17	RGd18	RKw17_2249.wav	0.514	768.1	1126.9	358.8	1042.6	115.09	768	1100	0.24	0.466926	1495.42	-98.1752	4.69e-05	1.10638	23.56	16.08	3.74	1078.1	1125
625	05_Ke17_Gd18	11	N	2	4	42	1	0	2	1706	20	F	English (mainly) + Hindi	Y	dogs	6	NA	Y	66	45	noted w/ regard to coos that it is upsetting - sounds like they're in pain. Noted surpirse that screams would be more intense context than coos	34	41	75	0.666667	0.545455	0.641026	RKw17	RGd18	RKw17_2249.wav	0.514	768.1	1126.9	358.8	1042.6	115.09	768	1100	0.24	0.466926	1495.42	-98.1752	4.69e-05	1.10638	23.56	16.08	3.74	1078.1	1125
626	06_Lq16_Kw17	23	N	2	3	1	2	1	2	1773	20	F	Mandarin	N			NA	N	38	33		NA	NA	NA	0.52381	0.575758	0.564103	RKw17	RLq16	RLq16_2256.wav	0.341	660.1	760	99.9	682.2	23.65	661	682	0.11	0.322581	900	-337.662	8.93e-05	1.32106	16.25	13.31	2.05	703.1	1265.6
627	06_Lq16_Kw17	19	N	2	3	15	2	1	2	379	51	F	English	Y	mice	240	NA	Y	36	29		43	47	90	0.511905	0.575758	0.487179	RKw17	RLq16	RLq16_2256.wav	0.341	660.1	760	99.9	682.2	23.65	661	682	0.11	0.322581	900	-337.662	8.93e-05	1.32106	16.25	13.31	2.05	703.1	1265.6
628	06_Lq16_Kw17	37	N	2	2	1	2	1	2	236	19	F	Spanish	N			NA	Y	44	32		NA	NA	NA	0.52381	0.606061	0.641026	RKw17	RLq16	RLq16_2256.wav	0.341	660.1	760	99.9	682.2	23.65	661	682	0.11	0.322581	900	-337.662	8.93e-05	1.32106	16.25	13.31	2.05	703.1	1265.6
629	06_Lq16_Kw17	113	N	2	3	19	2	0	1	1176	18	F	English	N			NA	Y	52	38		47	41	88	0.583333	0.848485	0.564103	RKw17	RLq16	RLq16_2256.wav	0.341	660.1	760	99.9	682.2	23.65	661	682	0.11	0.322581	900	-337.662	8.93e-05	1.32106	16.25	13.31	2.05	703.1	1265.6
630	06_Lq16_Kw17	106	N	2	4	30	2	1	2	1238	18	F	Korean	N			NA	Y	53	39		NA	NA	NA	0.607143	0.606061	0.461538	RKw17	RLq16	RLq16_2256.wav	0.341	660.1	760	99.9	682.2	23.65	661	682	0.11	0.322581	900	-337.662	8.93e-05	1.32106	16.25	13.31	2.05	703.1	1265.6
631	06_Lq16_Kw17	15	N	2	4	29	2	0	1	370	20	F	English and Chinese	N			NA	Y	58	36	didn't make it to face - just voice	NA	36	NA	0.488095	0.393939	0.461538	RKw17	RLq16	RLq16_2256.wav	0.341	660.1	760	99.9	682.2	23.65	661	682	0.11	0.322581	900	-337.662	8.93e-05	1.32106	16.25	13.31	2.05	703.1	1265.6
632	06_Lq16_Kw17	111	N	2	3	28	2	1	2	1732	21	F	English	N			NA	N	39	39		40	36	76	0.511905	0.575758	0.512821	RKw17	RLq16	RLq16_2256.wav	0.341	660.1	760	99.9	682.2	23.65	661	682	0.11	0.322581	900	-337.662	8.93e-05	1.32106	16.25	13.31	2.05	703.1	1265.6
633	06_Lq16_Kw17	46	N	2	3	17	2	1	2	376	18	F	English	N			NA	Y	45	25		39	42	81	0.619048	0.515152	0.589744	RKw17	RLq16	RLq16_2256.wav	0.341	660.1	760	99.9	682.2	23.65	661	682	0.11	0.322581	900	-337.662	8.93e-05	1.32106	16.25	13.31	2.05	703.1	1265.6
634	06_Lq16_Kw17	56	N	2	2	34	2	1	2	240	18	F	Chinese	N			NA	Y	31	30		NA	NA	NA	0.595238	0.575758	0.384615	RKw17	RLq16	RLq16_2256.wav	0.341	660.1	760	99.9	682.2	23.65	661	682	0.11	0.322581	900	-337.662	8.93e-05	1.32106	16.25	13.31	2.05	703.1	1265.6
635	06_Lq16_Kw17	16	N	2	1	27	2	1	2	285	21	F	English	Y	dogs, cats	6	NA	Y	44	43		38	40	78	0.559524	0.545455	0.461538	RKw17	RLq16	RLq16_2256.wav	0.341	660.1	760	99.9	682.2	23.65	661	682	0.11	0.322581	900	-337.662	8.93e-05	1.32106	16.25	13.31	2.05	703.1	1265.6
636	06_Lq16_Kw17	105	N	2	2	37	2	0	1	433	19	F	English	N			NA	Y	44	36		40	42	82	0.571429	0.606061	0.435897	RKw17	RLq16	RLq16_2256.wav	0.341	660.1	760	99.9	682.2	23.65	661	682	0.11	0.322581	900	-337.662	8.93e-05	1.32106	16.25	13.31	2.05	703.1	1265.6
637	06_Lq16_Kw17	70	N	2	3	34	2	0	1	71	18	F	English	N			NA	Y	62	34		48	45	93	0.52381	0.242424	0.384615	RKw17	RLq16	RLq16_2256.wav	0.341	660.1	760	99.9	682.2	23.65	661	682	0.11	0.322581	900	-337.662	8.93e-05	1.32106	16.25	13.31	2.05	703.1	1265.6
638	06_Lq16_Kw17	502	Y	2	1	12	2	1	2	1632	39	F	English	Y	Rhesus, pigrails, gorillas, orangutans, lemurs	216	204	Y	63	30		45	43	88	0.642857	0.909091	0.666667	RKw17	RLq16	RLq16_2256.wav	0.341	660.1	760	99.9	682.2	23.65	661	682	0.11	0.322581	900	-337.662	8.93e-05	1.32106	16.25	13.31	2.05	703.1	1265.6
639	06_Lq16_Kw17	42	N	2	2	25	2	1	2	226	19	F	English	N			NA	N	35	28		44	44	88	0.571429	0.454545	0.692308	RKw17	RLq16	RLq16_2256.wav	0.341	660.1	760	99.9	682.2	23.65	661	682	0.11	0.322581	900	-337.662	8.93e-05	1.32106	16.25	13.31	2.05	703.1	1265.6
640	06_Lq16_Kw17	109	N	2	3	28	2	1	2	271	20	F	English	N			NA	Y	41	33		45	43	88	0.666667	0.727273	0.384615	RKw17	RLq16	RLq16_2256.wav	0.341	660.1	760	99.9	682.2	23.65	661	682	0.11	0.322581	900	-337.662	8.93e-05	1.32106	16.25	13.31	2.05	703.1	1265.6
641	06_Lq16_Kw17	513	Y	2	1	16	2	0	1	1722	53	F	English	Y	chimps, bonobos, Rhesus macaque, Sooty mangabeys, pigtail macaque, gibbons, orangutan, stumptail macaques, baboons	288	288	Y	NA	NA		NA	NA	NA	0.535714	0.969697	0.589744	RKw17	RLq16	RLq16_2256.wav	0.341	660.1	760	99.9	682.2	23.65	661	682	0.11	0.322581	900	-337.662	8.93e-05	1.32106	16.25	13.31	2.05	703.1	1265.6
642	06_Lq16_Kw17	4	N	2	3	22	2	1	2	360	20	M	English	N			NA	N	43	38		27	24	51	0.559524	0.424242	0.589744	RKw17	RLq16	RLq16_2256.wav	0.341	660.1	760	99.9	682.2	23.65	661	682	0.11	0.322581	900	-337.662	8.93e-05	1.32106	16.25	13.31	2.05	703.1	1265.6
643	06_Lq16_Kw17	114	N	2	1	42	2	1	2	159	19	M	English	N			NA	Y	58	35		36	38	74	0.607143	0.393939	0.512821	RKw17	RLq16	RLq16_2256.wav	0.341	660.1	760	99.9	682.2	23.65	661	682	0.11	0.322581	900	-337.662	8.93e-05	1.32106	16.25	13.31	2.05	703.1	1265.6
644	06_Lq16_Kw17	95	N	2	2	36	2	1	2	473	20	F	English	N			NA	Y	57	30		39	44	83	0.571429	0.363636	0.564103	RKw17	RLq16	RLq16_2256.wav	0.341	660.1	760	99.9	682.2	23.65	661	682	0.11	0.322581	900	-337.662	8.93e-05	1.32106	16.25	13.31	2.05	703.1	1265.6
645	06_Lq16_Kw17	62	N	2	4	7	2	1	2	253	18	F	English	Y	mice	1	NA	Y	59	32		46	40	86	0.559524	0.484848	0.538462	RKw17	RLq16	RLq16_2256.wav	0.341	660.1	760	99.9	682.2	23.65	661	682	0.11	0.322581	900	-337.662	8.93e-05	1.32106	16.25	13.31	2.05	703.1	1265.6
646	06_Lq16_Kw17	66	N	2	2	31	2	1	2	594	20	M	Chinese	N			NA	N	41	38		NA	NA	NA	0.47619	0.69697	0.512821	RKw17	RLq16	RLq16_2256.wav	0.341	660.1	760	99.9	682.2	23.65	661	682	0.11	0.322581	900	-337.662	8.93e-05	1.32106	16.25	13.31	2.05	703.1	1265.6
647	06_Lq16_Kw17	28	N	2	2	18	2	1	2	617	40	F	English	N			NA	Y	50	33		42	NA	NA	0.630952	0.606061	0.564103	RKw17	RLq16	RLq16_2256.wav	0.341	660.1	760	99.9	682.2	23.65	661	682	0.11	0.322581	900	-337.662	8.93e-05	1.32106	16.25	13.31	2.05	703.1	1265.6
648	06_Lq16_Kw17	58	N	2	1	29	2	1	2	294	21	F	Spanish	Y	mice, rats	2	NA	Y	53	33		NA	NA	NA	0.547619	0.515152	0.461538	RKw17	RLq16	RLq16_2256.wav	0.341	660.1	760	99.9	682.2	23.65	661	682	0.11	0.322581	900	-337.662	8.93e-05	1.32106	16.25	13.31	2.05	703.1	1265.6
649	06_Lq16_Kw17	509	Y	2	1	38	2	1	2	290	28	M	Spanish/English	Y	Rhesus macaque, mangabey	48	48	Y	NA	NA		NA	NA	NA	0.464286	0.969697	0.615385	RKw17	RLq16	RLq16_2256.wav	0.341	660.1	760	99.9	682.2	23.65	661	682	0.11	0.322581	900	-337.662	8.93e-05	1.32106	16.25	13.31	2.05	703.1	1265.6
650	06_Lq16_Kw17	43	N	2	3	28	2	0	1	296	19	M	English	N			NA	Y	37	39		36	40	76	0.595238	0.666667	0.589744	RKw17	RLq16	RLq16_2256.wav	0.341	660.1	760	99.9	682.2	23.65	661	682	0.11	0.322581	900	-337.662	8.93e-05	1.32106	16.25	13.31	2.05	703.1	1265.6
651	06_Lq16_Kw17	49	N	2	4	41	2	1	2	511	18	F	English	N			NA	N	44	28		42	2	44	0.642857	0.454545	0.487179	RKw17	RLq16	RLq16_2256.wav	0.341	660.1	760	99.9	682.2	23.65	661	682	0.11	0.322581	900	-337.662	8.93e-05	1.32106	16.25	13.31	2.05	703.1	1265.6
652	06_Lq16_Kw17	65	N	2	2	41	2	1	2	811	20	F	Arabic	Y			NA	N	36	35		NA	NA	NA	0.559524	0.363636	0.564103	RKw17	RLq16	RLq16_2256.wav	0.341	660.1	760	99.9	682.2	23.65	661	682	0.11	0.322581	900	-337.662	8.93e-05	1.32106	16.25	13.31	2.05	703.1	1265.6
653	06_Lq16_Kw17	41	N	2	4	10	2	1	2	261	20	M	Vietnamese	N			NA	Y	45	29		NA	NA	NA	0.630952	0.454545	0.435897	RKw17	RLq16	RLq16_2256.wav	0.341	660.1	760	99.9	682.2	23.65	661	682	0.11	0.322581	900	-337.662	8.93e-05	1.32106	16.25	13.31	2.05	703.1	1265.6
654	06_Lq16_Kw17	85	N	2	1	17	2	1	2	660	19	F	Chinese	N			NA	Y	25	32		NA	NA	NA	0.571429	0.363636	0.435897	RKw17	RLq16	RLq16_2256.wav	0.341	660.1	760	99.9	682.2	23.65	661	682	0.11	0.322581	900	-337.662	8.93e-05	1.32106	16.25	13.31	2.05	703.1	1265.6
655	06_Lq16_Kw17	27	N	2	4	35	2	1	2	235	23	F	Telugu	N			NA	N	32	44		NA	NA	NA	0.547619	0.151515	0.512821	RKw17	RLq16	RLq16_2256.wav	0.341	660.1	760	99.9	682.2	23.65	661	682	0.11	0.322581	900	-337.662	8.93e-05	1.32106	16.25	13.31	2.05	703.1	1265.6
656	06_Lq16_Kw17	13	N	2	4	28	2	0	1	284	19	F	English	N			NA	N	21	34		42	41	83	0.5	0.666667	0.487179	RKw17	RLq16	RLq16_2256.wav	0.341	660.1	760	99.9	682.2	23.65	661	682	0.11	0.322581	900	-337.662	8.93e-05	1.32106	16.25	13.31	2.05	703.1	1265.6
657	06_Lq16_Kw17	508	Y	2	2	28	2	1	2	113	40	F	English	Y	Rhesus macaque, pigtail macaque, sooty mangabey	192	120	Y	NA	NA		NA	NA	NA	0.511905	0.969697	0.641026	RKw17	RLq16	RLq16_2256.wav	0.341	660.1	760	99.9	682.2	23.65	661	682	0.11	0.322581	900	-337.662	8.93e-05	1.32106	16.25	13.31	2.05	703.1	1265.6
658	06_Lq16_Kw17	24	N	2	2	41	2	1	2	1989	20	M	English	N			NA	N	41	24		35	36	71	0.404762	0.363636	0.666667	RKw17	RLq16	RLq16_2256.wav	0.341	660.1	760	99.9	682.2	23.65	661	682	0.11	0.322581	900	-337.662	8.93e-05	1.32106	16.25	13.31	2.05	703.1	1265.6
659	06_Lq16_Kw17	501	Y	2	4	17	2	1	2	725	26	M	English	Y	lemurs (black white ruffed, ringtail, red bellied, crown, mongoose), Rhesus monkeys, gorillas, orangutans	Lemur: 24, Rh: 48, Gorilla: 12, Orangutan: 12	48	Y	47	37		46	44	90	0.559524	0.69697	0.461538	RKw17	RLq16	RLq16_2256.wav	0.341	660.1	760	99.9	682.2	23.65	661	682	0.11	0.322581	900	-337.662	8.93e-05	1.32106	16.25	13.31	2.05	703.1	1265.6
660	06_Lq16_Kw17	1	N	2	1	18	2	0	1	1078	20	F	English	Y	cats, dogs	12	NA	Y	38	33		NA	40	NA	0.642857	0.333333	0.564103	RKw17	RLq16	RLq16_2256.wav	0.341	660.1	760	99.9	682.2	23.65	661	682	0.11	0.322581	900	-337.662	8.93e-05	1.32106	16.25	13.31	2.05	703.1	1265.6
661	06_Lq16_Kw17	71	N	2	2	25	2	1	2	1726	19	M	English	N			NA	Y	44	36		43	43	86	0.595238	0.424242	0.333333	RKw17	RLq16	RLq16_2256.wav	0.341	660.1	760	99.9	682.2	23.65	661	682	0.11	0.322581	900	-337.662	8.93e-05	1.32106	16.25	13.31	2.05	703.1	1265.6
662	06_Lq16_Kw17	102	N	2	1	9	2	1	2	238	18	F	English	Y	elephants, dogs, tortoises	3	NA	Y	46	44		33	36	69	0.559524	0.424242	0.461538	RKw17	RLq16	RLq16_2256.wav	0.341	660.1	760	99.9	682.2	23.65	661	682	0.11	0.322581	900	-337.662	8.93e-05	1.32106	16.25	13.31	2.05	703.1	1265.6
663	06_Lq16_Kw17	96	N	2	1	36	2	1	2	185	18	F	English	N			NA	Y	59	39		44	47	91	0.583333	0.727273	0.512821	RKw17	RLq16	RLq16_2256.wav	0.341	660.1	760	99.9	682.2	23.65	661	682	0.11	0.322581	900	-337.662	8.93e-05	1.32106	16.25	13.31	2.05	703.1	1265.6
664	06_Lq16_Kw17	36	N	2	3	1	2	1	2	396	19	F	English	Y	dogs, cats	4	NA	Y	53	31		42	42	84	0.416667	0.606061	0.435897	RKw17	RLq16	RLq16_2256.wav	0.341	660.1	760	99.9	682.2	23.65	661	682	0.11	0.322581	900	-337.662	8.93e-05	1.32106	16.25	13.31	2.05	703.1	1265.6
665	06_Lq16_Kw17	20	Y	2	2	9	2	1	2	449	37	F	English	Y	Rhesus, chimpanzees, dogs, cats, mice, rats	180	132	Y	52	33		46	47	93	0.392857	0.454545	0.589744	RKw17	RLq16	RLq16_2256.wav	0.341	660.1	760	99.9	682.2	23.65	661	682	0.11	0.322581	900	-337.662	8.93e-05	1.32106	16.25	13.31	2.05	703.1	1265.6
666	06_Lq16_Kw17	60	N	2	2	13	2	1	2	413	18	F	Chinese	N			NA	Y	54	33		NA	NA	NA	0.595238	0.69697	0.615385	RKw17	RLq16	RLq16_2256.wav	0.341	660.1	760	99.9	682.2	23.65	661	682	0.11	0.322581	900	-337.662	8.93e-05	1.32106	16.25	13.31	2.05	703.1	1265.6
667	06_Lq16_Kw17	93	N	2	1	24	2	1	2	516	19	F	English	N			NA	Y	53	37		38	38	76	0.52381	0.30303	0.487179	RKw17	RLq16	RLq16_2256.wav	0.341	660.1	760	99.9	682.2	23.65	661	682	0.11	0.322581	900	-337.662	8.93e-05	1.32106	16.25	13.31	2.05	703.1	1265.6
668	06_Lq16_Kw17	26	N	2	1	21	2	1	2	295	24	M	Telugu	N			NA	N	41	35		NA	NA	NA	0.607143	0.515152	0.538462	RKw17	RLq16	RLq16_2256.wav	0.341	660.1	760	99.9	682.2	23.65	661	682	0.11	0.322581	900	-337.662	8.93e-05	1.32106	16.25	13.31	2.05	703.1	1265.6
669	06_Lq16_Kw17	55	N	2	4	18	2	1	2	323	18	F	Mandarin	N			NA	Y	64	30		NA	NA	NA	0.690476	0.515152	0.410256	RKw17	RLq16	RLq16_2256.wav	0.341	660.1	760	99.9	682.2	23.65	661	682	0.11	0.322581	900	-337.662	8.93e-05	1.32106	16.25	13.31	2.05	703.1	1265.6
670	06_Lq16_Kw17	22	N	2	1	25	2	0	1	1672	31	F	English	Y	dogs, cats	6	NA	Y	56	49		47	46	93	0.452381	0.515152	0.692308	RKw17	RLq16	RLq16_2256.wav	0.341	660.1	760	99.9	682.2	23.65	661	682	0.11	0.322581	900	-337.662	8.93e-05	1.32106	16.25	13.31	2.05	703.1	1265.6
671	06_Lq16_Kw17	68	N	2	2	23	2	1	2	353	19	M	Spanish	N			NA	N	48	NA	didn't fill out this questionnaire animal	NA	NA	NA	0.607143	0.333333	0.641026	RKw17	RLq16	RLq16_2256.wav	0.341	660.1	760	99.9	682.2	23.65	661	682	0.11	0.322581	900	-337.662	8.93e-05	1.32106	16.25	13.31	2.05	703.1	1265.6
672	06_Lq16_Kw17	30	N	2	1	10	2	1	2	57	19	F	Chinese	N			NA	N	43	31		NA	NA	NA	0.535714	0.151515	0.641026	RKw17	RLq16	RLq16_2256.wav	0.341	660.1	760	99.9	682.2	23.65	661	682	0.11	0.322581	900	-337.662	8.93e-05	1.32106	16.25	13.31	2.05	703.1	1265.6
673	06_Lq16_Kw17	77	N	2	3	37	2	1	2	846	19	M	Chinese	N			NA	Y	46	18		NA	NA	NA	0.595238	0.454545	0.538462	RKw17	RLq16	RLq16_2256.wav	0.341	660.1	760	99.9	682.2	23.65	661	682	0.11	0.322581	900	-337.662	8.93e-05	1.32106	16.25	13.31	2.05	703.1	1265.6
674	06_Lq16_Kw17	81	N	2	4	38	2	1	2	299	18	F	English	N			NA	Y	53	33		43	51	94	0.690476	0.454545	0.538462	RKw17	RLq16	RLq16_2256.wav	0.341	660.1	760	99.9	682.2	23.65	661	682	0.11	0.322581	900	-337.662	8.93e-05	1.32106	16.25	13.31	2.05	703.1	1265.6
675	06_Lq16_Kw17	112	N	2	2	22	2	1	2	122	18	M	Turkish	N			NA	Y	55	40		NA	NA	NA	0.535714	0.424242	0.461538	RKw17	RLq16	RLq16_2256.wav	0.341	660.1	760	99.9	682.2	23.65	661	682	0.11	0.322581	900	-337.662	8.93e-05	1.32106	16.25	13.31	2.05	703.1	1265.6
676	06_Lq16_Kw17	84	N	2	3	30	2	1	2	184	19	F	English	N			NA	Y	34	36		35	37	72	0.547619	0.575758	0.512821	RKw17	RLq16	RLq16_2256.wav	0.341	660.1	760	99.9	682.2	23.65	661	682	0.11	0.322581	900	-337.662	8.93e-05	1.32106	16.25	13.31	2.05	703.1	1265.6
677	06_Lq16_Kw17	14	N	2	1	31	2	1	2	997	19	M	English and Mandarin	N			NA	N	43	35		32	39	71	0.642857	0.818182	0.615385	RKw17	RLq16	RLq16_2256.wav	0.341	660.1	760	99.9	682.2	23.65	661	682	0.11	0.322581	900	-337.662	8.93e-05	1.32106	16.25	13.31	2.05	703.1	1265.6
678	06_Lq16_Kw17	8	N	2	1	31	2	0	1	452	19	F	English	Y	dogs, cats	24	NA	Y	58	40		39	43	82	0.595238	0.363636	0.589744	RKw17	RLq16	RLq16_2256.wav	0.341	660.1	760	99.9	682.2	23.65	661	682	0.11	0.322581	900	-337.662	8.93e-05	1.32106	16.25	13.31	2.05	703.1	1265.6
679	06_Lq16_Kw17	83	N	2	3	3	2	0	1	524	19	F	English	N			NA	Y	55	46		48	46	94	0.5	0.333333	0.487179	RKw17	RLq16	RLq16_2256.wav	0.341	660.1	760	99.9	682.2	23.65	661	682	0.11	0.322581	900	-337.662	8.93e-05	1.32106	16.25	13.31	2.05	703.1	1265.6
680	06_Lq16_Kw17	40	N	2	2	30	2	1	2	294	19	F	Chinese	N			NA	N	39	39		NA	NA	NA	0.666667	0.515152	0.512821	RKw17	RLq16	RLq16_2256.wav	0.341	660.1	760	99.9	682.2	23.65	661	682	0.11	0.322581	900	-337.662	8.93e-05	1.32106	16.25	13.31	2.05	703.1	1265.6
681	06_Lq16_Kw17	48	N	2	1	36	2	1	2	348	19	F	English	N			NA	Y	33	36		36	46	82	0.654762	0.606061	0.564103	RKw17	RLq16	RLq16_2256.wav	0.341	660.1	760	99.9	682.2	23.65	661	682	0.11	0.322581	900	-337.662	8.93e-05	1.32106	16.25	13.31	2.05	703.1	1265.6
682	06_Lq16_Kw17	52	N	2	2	28	2	0	1	1600	19	F	English	N			NA	Y	55	38		42	43	85	0.619048	0.393939	0.512821	RKw17	RLq16	RLq16_2256.wav	0.341	660.1	760	99.9	682.2	23.65	661	682	0.11	0.322581	900	-337.662	8.93e-05	1.32106	16.25	13.31	2.05	703.1	1265.6
683	06_Lq16_Kw17	110	N	2	1	40	2	0	1	401	19	M	English	N			NA	Y	40	32		35	38	73	0.511905	0.69697	0.564103	RKw17	RLq16	RLq16_2256.wav	0.341	660.1	760	99.9	682.2	23.65	661	682	0.11	0.322581	900	-337.662	8.93e-05	1.32106	16.25	13.31	2.05	703.1	1265.6
684	06_Lq16_Kw17	88	N	2	1	36	2	1	2	413	19	M	Mandarin	N			NA	Y	49	27		NA	NA	NA	0.547619	0.818182	0.538462	RKw17	RLq16	RLq16_2256.wav	0.341	660.1	760	99.9	682.2	23.65	661	682	0.11	0.322581	900	-337.662	8.93e-05	1.32106	16.25	13.31	2.05	703.1	1265.6
685	06_Lq16_Kw17	44	N	2	1	28	2	1	2	420	31	F	English	N			NA	Y	39	34		47	45	92	0.571429	0.606061	0.333333	RKw17	RLq16	RLq16_2256.wav	0.341	660.1	760	99.9	682.2	23.65	661	682	0.11	0.322581	900	-337.662	8.93e-05	1.32106	16.25	13.31	2.05	703.1	1265.6
686	06_Lq16_Kw17	79	N	2	1	25	2	1	2	179	21	M	English	N			NA	Y	55	38		33	34	67	0.571429	0.393939	0.564103	RKw17	RLq16	RLq16_2256.wav	0.341	660.1	760	99.9	682.2	23.65	661	682	0.11	0.322581	900	-337.662	8.93e-05	1.32106	16.25	13.31	2.05	703.1	1265.6
687	06_Lq16_Kw17	34	N	2	3	37	2	1	2	422	24	M	Mandarin	N			NA	N	15	37		NA	NA	NA	0.511905	0.757576	0.282051	RKw17	RLq16	RLq16_2256.wav	0.341	660.1	760	99.9	682.2	23.65	661	682	0.11	0.322581	900	-337.662	8.93e-05	1.32106	16.25	13.31	2.05	703.1	1265.6
688	06_Lq16_Kw17	50	N	2	4	12	2	0	1	241	19	F	English	Y	dogs, cats	12	NA	Y	53	40		24	19	43	0.5	0.212121	0.512821	RKw17	RLq16	RLq16_2256.wav	0.341	660.1	760	99.9	682.2	23.65	661	682	0.11	0.322581	900	-337.662	8.93e-05	1.32106	16.25	13.31	2.05	703.1	1265.6
689	06_Lq16_Kw17	73	N	2	1	14	2	1	2	364	19	F	English and Chinese	N			NA	Y	41	37		34	36	70	0.571429	0.575758	0.538462	RKw17	RLq16	RLq16_2256.wav	0.341	660.1	760	99.9	682.2	23.65	661	682	0.11	0.322581	900	-337.662	8.93e-05	1.32106	16.25	13.31	2.05	703.1	1265.6
690	06_Lq16_Kw17	18	N	2	2	23	2	1	2	844	20	F	English	N			NA	Y	44	35		32	42	74	0.571429	0.151515	0.333333	RKw17	RLq16	RLq16_2256.wav	0.341	660.1	760	99.9	682.2	23.65	661	682	0.11	0.322581	900	-337.662	8.93e-05	1.32106	16.25	13.31	2.05	703.1	1265.6
691	06_Lq16_Kw17	506	Y	2	2	40	2	0	1	690	37	F	English	Y	Rhesus macaque	120	120	Y	NA	NA		NA	NA	NA	0.559524	0.424242	0.487179	RKw17	RLq16	RLq16_2256.wav	0.341	660.1	760	99.9	682.2	23.65	661	682	0.11	0.322581	900	-337.662	8.93e-05	1.32106	16.25	13.31	2.05	703.1	1265.6
692	06_Lq16_Kw17	69	N	2	2	20	2	0	1	653	20	F	English	N			NA	Y	40	37		42	43	85	0.547619	0.424242	0.615385	RKw17	RLq16	RLq16_2256.wav	0.341	660.1	760	99.9	682.2	23.65	661	682	0.11	0.322581	900	-337.662	8.93e-05	1.32106	16.25	13.31	2.05	703.1	1265.6
693	06_Lq16_Kw17	11	N	2	4	14	2	1	2	394	20	F	English (mainly) + Hindi	Y	dogs	6	NA	Y	66	45	noted w/ regard to coos that it is upsetting - sounds like they're in pain. Noted surpirse that screams would be more intense context than coos	34	41	75	0.666667	0.545455	0.641026	RKw17	RLq16	RLq16_2256.wav	0.341	660.1	760	99.9	682.2	23.65	661	682	0.11	0.322581	900	-337.662	8.93e-05	1.32106	16.25	13.31	2.05	703.1	1265.6
694	06_Lq16_Kw17	3	N	2	2	13	2	0	1	1967	28	M	English	N			NA	Y	39	30		45	42	87	0.559524	0.575758	0.487179	RKw17	RLq16	RLq16_2256.wav	0.341	660.1	760	99.9	682.2	23.65	661	682	0.11	0.322581	900	-337.662	8.93e-05	1.32106	16.25	13.31	2.05	703.1	1265.6
695	06_Lq16_Kw17	7	N	2	1	20	2	1	2	472	21	F	English	N			NA	Y	49	33		44	43	87	0.583333	0.363636	0.615385	RKw17	RLq16	RLq16_2256.wav	0.341	660.1	760	99.9	682.2	23.65	661	682	0.11	0.322581	900	-337.662	8.93e-05	1.32106	16.25	13.31	2.05	703.1	1265.6
696	06_Lq16_Kw17	91	N	2	1	38	2	0	1	19	20	F	Chinese	N			NA	N	49	36		NA	NA	NA	0.547619	0.606061	0.641026	RKw17	RLq16	RLq16_2256.wav	0.341	660.1	760	99.9	682.2	23.65	661	682	0.11	0.322581	900	-337.662	8.93e-05	1.32106	16.25	13.31	2.05	703.1	1265.6
697	06_Lq16_Kw17	5	N	2	3	4	2	1	2	161	29	F	English	Y	cat, dog, horse, cow	6+ years	NA	Y	41	35		46	49	95	0.583333	0.393939	0.564103	RKw17	RLq16	RLq16_2256.wav	0.341	660.1	760	99.9	682.2	23.65	661	682	0.11	0.322581	900	-337.662	8.93e-05	1.32106	16.25	13.31	2.05	703.1	1265.6
698	06_Lq16_Kw17	101	N	2	4	36	2	1	2	880	19	F	English	Y	mice	11	NA	Y	50	40		43	43	86	0.690476	0.484848	0.487179	RKw17	RLq16	RLq16_2256.wav	0.341	660.1	760	99.9	682.2	23.65	661	682	0.11	0.322581	900	-337.662	8.93e-05	1.32106	16.25	13.31	2.05	703.1	1265.6
699	06_Lq16_Kw17	47	N	2	3	21	2	1	2	260	18	F	English	N			NA	Y	60	42		42	45	87	0.47619	0.30303	0.333333	RKw17	RLq16	RLq16_2256.wav	0.341	660.1	760	99.9	682.2	23.65	661	682	0.11	0.322581	900	-337.662	8.93e-05	1.32106	16.25	13.31	2.05	703.1	1265.6
700	06_Lq16_Kw17	90	N	2	3	37	2	1	2	389	21	M	English	N			NA	N	43	24		42	42	84	0.52381	0.69697	0.641026	RKw17	RLq16	RLq16_2256.wav	0.341	660.1	760	99.9	682.2	23.65	661	682	0.11	0.322581	900	-337.662	8.93e-05	1.32106	16.25	13.31	2.05	703.1	1265.6
701	06_Lq16_Kw17	75	N	2	2	41	2	0	1	878	19	M	Chinese	Y	fruitfly, termites	1.5	NA	N	58	38		NA	NA	NA	0.547619	0.484848	0.461538	RKw17	RLq16	RLq16_2256.wav	0.341	660.1	760	99.9	682.2	23.65	661	682	0.11	0.322581	900	-337.662	8.93e-05	1.32106	16.25	13.31	2.05	703.1	1265.6
702	06_Lq16_Kw17	107	N	2	4	41	2	1	2	9	22	F	Chinese	N			NA	N	21	37		NA	NA	NA	0.595238	0.424242	0.435897	RKw17	RLq16	RLq16_2256.wav	0.341	660.1	760	99.9	682.2	23.65	661	682	0.11	0.322581	900	-337.662	8.93e-05	1.32106	16.25	13.31	2.05	703.1	1265.6
703	06_Lq16_Kw17	17	N	2	2	20	2	1	2	742	19	F	Chinese	N			NA	Y	49	34		NA	NA	NA	0.595238	1	0.487179	RKw17	RLq16	RLq16_2256.wav	0.341	660.1	760	99.9	682.2	23.65	661	682	0.11	0.322581	900	-337.662	8.93e-05	1.32106	16.25	13.31	2.05	703.1	1265.6
704	06_Lq16_Kw17	72	N	2	3	38	2	1	2	17	19	F	English	N			NA	Y	48	33		35	31	66	0.511905	0.69697	0.538462	RKw17	RLq16	RLq16_2256.wav	0.341	660.1	760	99.9	682.2	23.65	661	682	0.11	0.322581	900	-337.662	8.93e-05	1.32106	16.25	13.31	2.05	703.1	1265.6
705	06_Lq16_Kw17	87	N	2	4	33	2	0	1	365	19	F	Korean	N			NA	Y	53	41		NA	NA	NA	0.654762	0.787879	0.615385	RKw17	RLq16	RLq16_2256.wav	0.341	660.1	760	99.9	682.2	23.65	661	682	0.11	0.322581	900	-337.662	8.93e-05	1.32106	16.25	13.31	2.05	703.1	1265.6
706	06_Lq16_Kw17	63	N	2	4	1	2	1	2	853	19	F	English	N			NA	N	60	40		44	42	86	0.535714	0	0.717949	RKw17	RLq16	RLq16_2256.wav	0.341	660.1	760	99.9	682.2	23.65	661	682	0.11	0.322581	900	-337.662	8.93e-05	1.32106	16.25	13.31	2.05	703.1	1265.6
707	06_Lq16_Kw17	31	N	2	4	11	2	0	1	781	18	F	English	N			NA	Y	47	35		38	40	78	0.583333	0.575758	0.384615	RKw17	RLq16	RLq16_2256.wav	0.341	660.1	760	99.9	682.2	23.65	661	682	0.11	0.322581	900	-337.662	8.93e-05	1.32106	16.25	13.31	2.05	703.1	1265.6
708	06_Lq16_Kw17	38	N	2	4	29	2	1	2	551	18	F	English	N			NA	Y	57	36		41	41	82	0.619048	0.606061	0.615385	RKw17	RLq16	RLq16_2256.wav	0.341	660.1	760	99.9	682.2	23.65	661	682	0.11	0.322581	900	-337.662	8.93e-05	1.32106	16.25	13.31	2.05	703.1	1265.6
709	06_Lq16_Kw17	74	N	2	4	30	2	0	1	1325	19	F	English	Y	cats, dogs	1	NA	Y	47	41		41	43	84	0.428571	0.272727	0.538462	RKw17	RLq16	RLq16_2256.wav	0.341	660.1	760	99.9	682.2	23.65	661	682	0.11	0.322581	900	-337.662	8.93e-05	1.32106	16.25	13.31	2.05	703.1	1265.6
710	06_Lq16_Kw17	512	Y	2	2	35	2	0	1	325	39	M	English	Y	Rhesus macaque, pigtail macaque, common chimpanzee, west lowland gorilla, Sooty mangabey	144	144	Y	NA	NA	occasionally needed to answer radio during task	NA	NA	NA	0.642857	1	0.589744	RKw17	RLq16	RLq16_2256.wav	0.341	660.1	760	99.9	682.2	23.65	661	682	0.11	0.322581	900	-337.662	8.93e-05	1.32106	16.25	13.31	2.05	703.1	1265.6
711	06_Lq16_Kw17	10	N	2	3	16	2	1	2	333	21	F	English	N			NA	Y	50	38		36	38	74	0.559524	0.757576	0.358974	RKw17	RLq16	RLq16_2256.wav	0.341	660.1	760	99.9	682.2	23.65	661	682	0.11	0.322581	900	-337.662	8.93e-05	1.32106	16.25	13.31	2.05	703.1	1265.6
712	06_Lq16_Kw17	6	N	2	1	34	2	1	2	396	23	M	English	Y	mice	3	NA	Y	31	28		38	41	79	0.595238	0.484848	0.589744	RKw17	RLq16	RLq16_2256.wav	0.341	660.1	760	99.9	682.2	23.65	661	682	0.11	0.322581	900	-337.662	8.93e-05	1.32106	16.25	13.31	2.05	703.1	1265.6
713	06_Lq16_Kw17	32	N	2	1	1	2	1	2	4219	23	F	English	N			NA	N	58	26		34	33	67	0.559524	0.424242	0.435897	RKw17	RLq16	RLq16_2256.wav	0.341	660.1	760	99.9	682.2	23.65	661	682	0.11	0.322581	900	-337.662	8.93e-05	1.32106	16.25	13.31	2.05	703.1	1265.6
714	06_Lq16_Kw17	98	N	2	4	4	2	1	2	249	18	F	English	N			NA	Y	36	39		37	48	85	0.690476	0.393939	0.538462	RKw17	RLq16	RLq16_2256.wav	0.341	660.1	760	99.9	682.2	23.65	661	682	0.11	0.322581	900	-337.662	8.93e-05	1.32106	16.25	13.31	2.05	703.1	1265.6
715	06_Lq16_Kw17	510	Y	2	1	18	2	1	2	4619	30	M	English	Y	Rhesus macaque, Sooty mangabey	60	60	Y	NA	NA	asked for more clarification on "intense emotion" ~3 min into task	NA	NA	NA	0.511905	0.727273	0.717949	RKw17	RLq16	RLq16_2256.wav	0.341	660.1	760	99.9	682.2	23.65	661	682	0.11	0.322581	900	-337.662	8.93e-05	1.32106	16.25	13.31	2.05	703.1	1265.6
716	06_Lq16_Kw17	12	N	2	4	9	2	0	1	786	21	M	Chinese	N			NA	Y	41	34		NA	NA	NA	0.642857	0.484848	0.410256	RKw17	RLq16	RLq16_2256.wav	0.341	660.1	760	99.9	682.2	23.65	661	682	0.11	0.322581	900	-337.662	8.93e-05	1.32106	16.25	13.31	2.05	703.1	1265.6
717	06_Lq16_Kw17	35	N	2	1	22	2	1	2	402	19	M	English	N			NA	N	40	21		44	39	83	0.666667	0.818182	0.641026	RKw17	RLq16	RLq16_2256.wav	0.341	660.1	760	99.9	682.2	23.65	661	682	0.11	0.322581	900	-337.662	8.93e-05	1.32106	16.25	13.31	2.05	703.1	1265.6
718	06_Lq16_Kw17	67	N	2	3	33	2	1	2	372	18	F	English	N			NA	N	29	44		32	32	64	0.75	0.636364	0.564103	RKw17	RLq16	RLq16_2256.wav	0.341	660.1	760	99.9	682.2	23.65	661	682	0.11	0.322581	900	-337.662	8.93e-05	1.32106	16.25	13.31	2.05	703.1	1265.6
719	06_Lq16_Kw17	104	N	2	1	21	2	1	2	762	19	F	Bangla	N			NA	N	49	31		NA	NA	NA	0.619048	0.363636	0.384615	RKw17	RLq16	RLq16_2256.wav	0.341	660.1	760	99.9	682.2	23.65	661	682	0.11	0.322581	900	-337.662	8.93e-05	1.32106	16.25	13.31	2.05	703.1	1265.6
720	06_Lq16_Kw17	103	N	2	4	25	2	0	1	238	19	F	Korean + English	Y	dogs, cats	3	NA	Y	47	39		40	41	81	0.52381	0.393939	0.512821	RKw17	RLq16	RLq16_2256.wav	0.341	660.1	760	99.9	682.2	23.65	661	682	0.11	0.322581	900	-337.662	8.93e-05	1.32106	16.25	13.31	2.05	703.1	1265.6
721	06_Lq16_Kw17	89	N	2	1	26	2	1	2	1417	18	F	Spanish	N			NA	Y	50	37		NA	NA	NA	0.619048	0.818182	0.589744	RKw17	RLq16	RLq16_2256.wav	0.341	660.1	760	99.9	682.2	23.65	661	682	0.11	0.322581	900	-337.662	8.93e-05	1.32106	16.25	13.31	2.05	703.1	1265.6
722	06_Lq16_Kw17	99	N	2	1	30	2	1	2	102	19	F	English + Hindi	N			NA	Y	56	37		37	39	76	0.595238	0.30303	0.461538	RKw17	RLq16	RLq16_2256.wav	0.341	660.1	760	99.9	682.2	23.65	661	682	0.11	0.322581	900	-337.662	8.93e-05	1.32106	16.25	13.31	2.05	703.1	1265.6
723	06_Lq16_Kw17	511	Y	2	1	36	2	1	2	626	24	F	English	Y	Rhesus macaque, domestic cats	24	24	Y	NA	NA		NA	NA	NA	0.571429	0.69697	0.512821	RKw17	RLq16	RLq16_2256.wav	0.341	660.1	760	99.9	682.2	23.65	661	682	0.11	0.322581	900	-337.662	8.93e-05	1.32106	16.25	13.31	2.05	703.1	1265.6
724	06_Lq16_Kw17	29	N	2	1	11	2	1	2	532	19	F	English	Y	dogs, cats	3	NA	Y	63	44		47	41	88	0.547619	0.454545	0.512821	RKw17	RLq16	RLq16_2256.wav	0.341	660.1	760	99.9	682.2	23.65	661	682	0.11	0.322581	900	-337.662	8.93e-05	1.32106	16.25	13.31	2.05	703.1	1265.6
725	06_Lq16_Kw17	507	Y	2	1	17	2	1	2	521	27	F	English	Y	Rhesus macaque, tufted capuchins	60	48	Y	NA	NA		NA	NA	NA	0.547619	1	0.666667	RKw17	RLq16	RLq16_2256.wav	0.341	660.1	760	99.9	682.2	23.65	661	682	0.11	0.322581	900	-337.662	8.93e-05	1.32106	16.25	13.31	2.05	703.1	1265.6
726	06_Lq16_Kw17	92	N	2	2	16	2	1	2	426	18	F	English	N			NA	Y	45	30		36	36	72	0.595238	0.212121	0.589744	RKw17	RLq16	RLq16_2256.wav	0.341	660.1	760	99.9	682.2	23.65	661	682	0.11	0.322581	900	-337.662	8.93e-05	1.32106	16.25	13.31	2.05	703.1	1265.6
727	06_Lq16_Kw17	86	N	2	1	10	2	1	2	252	22	M	Chinese	N			NA	Y	44	35		NA	NA	NA	0.666667	0.515152	0.641026	RKw17	RLq16	RLq16_2256.wav	0.341	660.1	760	99.9	682.2	23.65	661	682	0.11	0.322581	900	-337.662	8.93e-05	1.32106	16.25	13.31	2.05	703.1	1265.6
728	06_Lq16_Kw17	33	N	2	2	33	2	1	2	481	19	F	Mandarin + English	N			NA	Y	56	33		NA	NA	NA	0.571429	0.272727	0.615385	RKw17	RLq16	RLq16_2256.wav	0.341	660.1	760	99.9	682.2	23.65	661	682	0.11	0.322581	900	-337.662	8.93e-05	1.32106	16.25	13.31	2.05	703.1	1265.6
729	06_Lq16_Kw17	21	N	2	1	25	2	1	2	274	20	F	English	Y	dogs	6	NA	Y	44	37		41	34	75	0.630952	0.787879	0.384615	RKw17	RLq16	RLq16_2256.wav	0.341	660.1	760	99.9	682.2	23.65	661	682	0.11	0.322581	900	-337.662	8.93e-05	1.32106	16.25	13.31	2.05	703.1	1265.6
730	06_Lq16_Kw17	94	N	2	2	7	2	1	2	584	20	F	English	N			NA	Y	45	44		40	44	84	0.72619	0.878788	0.410256	RKw17	RLq16	RLq16_2256.wav	0.341	660.1	760	99.9	682.2	23.65	661	682	0.11	0.322581	900	-337.662	8.93e-05	1.32106	16.25	13.31	2.05	703.1	1265.6
731	06_Lq16_Kw17	108	N	2	2	16	2	1	2	223	19	M	English	N			NA	N	59	24		45	43	88	0.571429	0.393939	0.435897	RKw17	RLq16	RLq16_2256.wav	0.341	660.1	760	99.9	682.2	23.65	661	682	0.11	0.322581	900	-337.662	8.93e-05	1.32106	16.25	13.31	2.05	703.1	1265.6
732	06_Lq16_Kw17	51	N	2	1	9	2	1	2	272	18	F	English	N			NA	Y	31	36		45	44	89	0.654762	0.515152	0.615385	RKw17	RLq16	RLq16_2256.wav	0.341	660.1	760	99.9	682.2	23.65	661	682	0.11	0.322581	900	-337.662	8.93e-05	1.32106	16.25	13.31	2.05	703.1	1265.6
733	06_Lq16_Kw17	25	N	2	3	5	2	0	1	183	21	M	English	N			NA	N	56	32		34	41	75	0.5	0.575758	0.461538	RKw17	RLq16	RLq16_2256.wav	0.341	660.1	760	99.9	682.2	23.65	661	682	0.11	0.322581	900	-337.662	8.93e-05	1.32106	16.25	13.31	2.05	703.1	1265.6
734	06_Lq16_Kw17	82	N	2	2	8	2	1	2	584	18	F	Korean	Y	dogs, cats	3	NA	Y	31	40		NA	NA	NA	0.559524	0.333333	0.641026	RKw17	RLq16	RLq16_2256.wav	0.341	660.1	760	99.9	682.2	23.65	661	682	0.11	0.322581	900	-337.662	8.93e-05	1.32106	16.25	13.31	2.05	703.1	1265.6
735	06_Lq16_Kw17	97	N	2	4	36	2	1	2	1630	19	F	English	N			NA	Y	48	28		40	43	83	0.595238	0.606061	0.487179	RKw17	RLq16	RLq16_2256.wav	0.341	660.1	760	99.9	682.2	23.65	661	682	0.11	0.322581	900	-337.662	8.93e-05	1.32106	16.25	13.31	2.05	703.1	1265.6
736	06_Lq16_Kw17	54	N	2	1	8	2	1	2	279	18	F	Chinese	N			NA	N	35	41		NA	NA	NA	0.535714	0.424242	0.538462	RKw17	RLq16	RLq16_2256.wav	0.341	660.1	760	99.9	682.2	23.65	661	682	0.11	0.322581	900	-337.662	8.93e-05	1.32106	16.25	13.31	2.05	703.1	1265.6
737	06_Lq16_Kw17	78	N	2	2	15	2	0	1	495	20	M	Spanish	Y	dogs, snakes	2	NA	Y	45	35		NA	NA	NA	0.547619	0.424242	0.487179	RKw17	RLq16	RLq16_2256.wav	0.341	660.1	760	99.9	682.2	23.65	661	682	0.11	0.322581	900	-337.662	8.93e-05	1.32106	16.25	13.31	2.05	703.1	1265.6
738	06_Lq16_Kw17	80	N	2	4	3	2	1	2	258	18	F	English	N			NA	Y	57	34		36	3	39	0.607143	0.545455	0.358974	RKw17	RLq16	RLq16_2256.wav	0.341	660.1	760	99.9	682.2	23.65	661	682	0.11	0.322581	900	-337.662	8.93e-05	1.32106	16.25	13.31	2.05	703.1	1265.6
739	06_Lq16_Kw17	2	N	2	3	6	2	1	2	394	19	F	English	N			NA	Y	49	42		36	37	73	0.595238	0.0606061	0.641026	RKw17	RLq16	RLq16_2256.wav	0.341	660.1	760	99.9	682.2	23.65	661	682	0.11	0.322581	900	-337.662	8.93e-05	1.32106	16.25	13.31	2.05	703.1	1265.6
740	06_Lq16_Kw17	39	N	2	3	8	2	1	2	874	19	F	Spanish/English	N			NA	Y	55	38		41	43	84	0.583333	0.454545	0.538462	RKw17	RLq16	RLq16_2256.wav	0.341	660.1	760	99.9	682.2	23.65	661	682	0.11	0.322581	900	-337.662	8.93e-05	1.32106	16.25	13.31	2.05	703.1	1265.6
741	06_Lq16_Kw17	53	N	2	1	9	2	1	2	330	18	F	English	N			NA	N	71	47		22	17	39	0.642857	0.787879	0.641026	RKw17	RLq16	RLq16_2256.wav	0.341	660.1	760	99.9	682.2	23.65	661	682	0.11	0.322581	900	-337.662	8.93e-05	1.32106	16.25	13.31	2.05	703.1	1265.6
742	06_Lq16_Kw17	100	N	2	3	29	2	1	2	417	21	F	Mandarin	N			NA	Y	50	36		NA	NA	NA	0.619048	0.424242	0.641026	RKw17	RLq16	RLq16_2256.wav	0.341	660.1	760	99.9	682.2	23.65	661	682	0.11	0.322581	900	-337.662	8.93e-05	1.32106	16.25	13.31	2.05	703.1	1265.6
743	06_Lq16_Kw17	57	N	2	4	35	2	1	2	250	20	F	English	N			NA	N	29	31		27	41	68	0.547619	0.333333	0.538462	RKw17	RLq16	RLq16_2256.wav	0.341	660.1	760	99.9	682.2	23.65	661	682	0.11	0.322581	900	-337.662	8.93e-05	1.32106	16.25	13.31	2.05	703.1	1265.6
744	06_Lq16_Kw17	115	N	2	4	22	2	1	2	1064	18	M	Mandarin	N			NA	N	31	37		NA	NA	NA	0.583333	0.575758	0.461538	RKw17	RLq16	RLq16_2256.wav	0.341	660.1	760	99.9	682.2	23.65	661	682	0.11	0.322581	900	-337.662	8.93e-05	1.32106	16.25	13.31	2.05	703.1	1265.6
745	06_Lq16_Kw17	505	Y	2	2	17	2	1	2	1656	30	F	English	Y	Rhesus macaque, horses, dogs, cats, birds, mangabey	120	94	Y	NA	NA		NA	NA	NA	0.595238	1	0.589744	RKw17	RLq16	RLq16_2256.wav	0.341	660.1	760	99.9	682.2	23.65	661	682	0.11	0.322581	900	-337.662	8.93e-05	1.32106	16.25	13.31	2.05	703.1	1265.6
746	06_Lq16_Kw17	59	N	2	1	29	2	1	2	242	18	M	Gujarati	N			NA	N	37	38		NA	NA	NA	0.52381	0.393939	0.666667	RKw17	RLq16	RLq16_2256.wav	0.341	660.1	760	99.9	682.2	23.65	661	682	0.11	0.322581	900	-337.662	8.93e-05	1.32106	16.25	13.31	2.05	703.1	1265.6
747	06_Lq16_Kw17	9	N	2	1	14	2	1	2	417	19	M	English	Y	dogs, cats	3	NA	Y	41	31		35	32	67	0.416667	0.121212	0.435897	RKw17	RLq16	RLq16_2256.wav	0.341	660.1	760	99.9	682.2	23.65	661	682	0.11	0.322581	900	-337.662	8.93e-05	1.32106	16.25	13.31	2.05	703.1	1265.6
748	06_Lq16_Kw17	76	N	2	4	17	2	0	1	649	19	F	Chinese	N			NA	Y	41	41		NA	NA	NA	0.630952	0.393939	0.538462	RKw17	RLq16	RLq16_2256.wav	0.341	660.1	760	99.9	682.2	23.65	661	682	0.11	0.322581	900	-337.662	8.93e-05	1.32106	16.25	13.31	2.05	703.1	1265.6
749	06_Lq16_Kw17	64	N	2	4	14	2	1	2	7620	18	F	English	N			NA	N	55	36		40	42	82	0.654762	0.393939	0.666667	RKw17	RLq16	RLq16_2256.wav	0.341	660.1	760	99.9	682.2	23.65	661	682	0.11	0.322581	900	-337.662	8.93e-05	1.32106	16.25	13.31	2.05	703.1	1265.6
750	06_Lq16_Kw17	61	N	2	4	23	2	1	2	1868	19	M	English	N			NA	Y	42	36		43	35	78	0.619048	0.424242	0.461538	RKw17	RLq16	RLq16_2256.wav	0.341	660.1	760	99.9	682.2	23.65	661	682	0.11	0.322581	900	-337.662	8.93e-05	1.32106	16.25	13.31	2.05	703.1	1265.6
751	07_Kw17_Sr17	21	N	2	1	27	1	1	1	523	20	F	English	Y	dogs	6	NA	Y	44	37		41	34	75	0.630952	0.787879	0.384615	RKw17	RSr17	RKw17_2249.wav	0.514	768.1	1126.9	358.8	1042.6	115.09	768	1100	0.24	0.466926	1495.42	-98.1752	4.69e-05	1.10638	23.56	16.08	3.74	1078.1	1125
752	07_Kw17_Sr17	74	N	2	4	33	1	1	1	560	19	F	English	Y	cats, dogs	1	NA	Y	47	41		41	43	84	0.428571	0.272727	0.538462	RKw17	RSr17	RKw17_2249.wav	0.514	768.1	1126.9	358.8	1042.6	115.09	768	1100	0.24	0.466926	1495.42	-98.1752	4.69e-05	1.10638	23.56	16.08	3.74	1078.1	1125
753	07_Kw17_Sr17	106	N	2	4	24	1	0	2	620	18	F	Korean	N			NA	Y	53	39		NA	NA	NA	0.607143	0.606061	0.461538	RKw17	RSr17	RKw17_2249.wav	0.514	768.1	1126.9	358.8	1042.6	115.09	768	1100	0.24	0.466926	1495.42	-98.1752	4.69e-05	1.10638	23.56	16.08	3.74	1078.1	1125
754	07_Kw17_Sr17	115	N	2	4	15	1	1	1	2388	18	M	Mandarin	N			NA	N	31	37		NA	NA	NA	0.583333	0.575758	0.461538	RKw17	RSr17	RKw17_2249.wav	0.514	768.1	1126.9	358.8	1042.6	115.09	768	1100	0.24	0.466926	1495.42	-98.1752	4.69e-05	1.10638	23.56	16.08	3.74	1078.1	1125
755	07_Kw17_Sr17	502	Y	2	1	33	1	0	2	2140	39	F	English	Y	Rhesus, pigrails, gorillas, orangutans, lemurs	216	204	Y	63	30		45	43	88	0.642857	0.909091	0.666667	RKw17	RSr17	RKw17_2249.wav	0.514	768.1	1126.9	358.8	1042.6	115.09	768	1100	0.24	0.466926	1495.42	-98.1752	4.69e-05	1.10638	23.56	16.08	3.74	1078.1	1125
756	07_Kw17_Sr17	509	Y	2	1	13	1	0	2	434	28	M	Spanish/English	Y	Rhesus macaque, mangabey	48	48	Y	NA	NA		NA	NA	NA	0.464286	0.969697	0.615385	RKw17	RSr17	RKw17_2249.wav	0.514	768.1	1126.9	358.8	1042.6	115.09	768	1100	0.24	0.466926	1495.42	-98.1752	4.69e-05	1.10638	23.56	16.08	3.74	1078.1	1125
757	07_Kw17_Sr17	43	N	2	3	34	1	1	1	1599	19	M	English	N			NA	Y	37	39		36	40	76	0.595238	0.666667	0.589744	RKw17	RSr17	RKw17_2249.wav	0.514	768.1	1126.9	358.8	1042.6	115.09	768	1100	0.24	0.466926	1495.42	-98.1752	4.69e-05	1.10638	23.56	16.08	3.74	1078.1	1125
758	07_Kw17_Sr17	29	N	2	1	19	1	1	1	951	19	F	English	Y	dogs, cats	3	NA	Y	63	44		47	41	88	0.547619	0.454545	0.512821	RKw17	RSr17	RKw17_2249.wav	0.514	768.1	1126.9	358.8	1042.6	115.09	768	1100	0.24	0.466926	1495.42	-98.1752	4.69e-05	1.10638	23.56	16.08	3.74	1078.1	1125
759	07_Kw17_Sr17	4	N	2	3	29	1	0	2	191	20	M	English	N			NA	N	43	38		27	24	51	0.559524	0.424242	0.589744	RKw17	RSr17	RKw17_2249.wav	0.514	768.1	1126.9	358.8	1042.6	115.09	768	1100	0.24	0.466926	1495.42	-98.1752	4.69e-05	1.10638	23.56	16.08	3.74	1078.1	1125
760	07_Kw17_Sr17	96	N	2	1	39	1	0	2	192	18	F	English	N			NA	Y	59	39		44	47	91	0.583333	0.727273	0.512821	RKw17	RSr17	RKw17_2249.wav	0.514	768.1	1126.9	358.8	1042.6	115.09	768	1100	0.24	0.466926	1495.42	-98.1752	4.69e-05	1.10638	23.56	16.08	3.74	1078.1	1125
761	07_Kw17_Sr17	89	N	2	1	11	1	0	2	528	18	F	Spanish	N			NA	Y	50	37		NA	NA	NA	0.619048	0.818182	0.589744	RKw17	RSr17	RKw17_2249.wav	0.514	768.1	1126.9	358.8	1042.6	115.09	768	1100	0.24	0.466926	1495.42	-98.1752	4.69e-05	1.10638	23.56	16.08	3.74	1078.1	1125
762	07_Kw17_Sr17	17	N	2	2	5	1	0	2	916	19	F	Chinese	N			NA	Y	49	34		NA	NA	NA	0.595238	1	0.487179	RKw17	RSr17	RKw17_2249.wav	0.514	768.1	1126.9	358.8	1042.6	115.09	768	1100	0.24	0.466926	1495.42	-98.1752	4.69e-05	1.10638	23.56	16.08	3.74	1078.1	1125
763	07_Kw17_Sr17	512	Y	2	2	24	1	0	2	877	39	M	English	Y	Rhesus macaque, pigtail macaque, common chimpanzee, west lowland gorilla, Sooty mangabey	144	144	Y	NA	NA	occasionally needed to answer radio during task	NA	NA	NA	0.642857	1	0.589744	RKw17	RSr17	RKw17_2249.wav	0.514	768.1	1126.9	358.8	1042.6	115.09	768	1100	0.24	0.466926	1495.42	-98.1752	4.69e-05	1.10638	23.56	16.08	3.74	1078.1	1125
764	07_Kw17_Sr17	57	N	2	4	13	1	1	1	241	20	F	English	N			NA	N	29	31		27	41	68	0.547619	0.333333	0.538462	RKw17	RSr17	RKw17_2249.wav	0.514	768.1	1126.9	358.8	1042.6	115.09	768	1100	0.24	0.466926	1495.42	-98.1752	4.69e-05	1.10638	23.56	16.08	3.74	1078.1	1125
765	07_Kw17_Sr17	52	N	2	2	8	1	0	2	485	19	F	English	N			NA	Y	55	38		42	43	85	0.619048	0.393939	0.512821	RKw17	RSr17	RKw17_2249.wav	0.514	768.1	1126.9	358.8	1042.6	115.09	768	1100	0.24	0.466926	1495.42	-98.1752	4.69e-05	1.10638	23.56	16.08	3.74	1078.1	1125
766	07_Kw17_Sr17	101	N	2	4	11	1	1	1	755	19	F	English	Y	mice	11	NA	Y	50	40		43	43	86	0.690476	0.484848	0.487179	RKw17	RSr17	RKw17_2249.wav	0.514	768.1	1126.9	358.8	1042.6	115.09	768	1100	0.24	0.466926	1495.42	-98.1752	4.69e-05	1.10638	23.56	16.08	3.74	1078.1	1125
767	07_Kw17_Sr17	56	N	2	2	28	1	0	2	349	18	F	Chinese	N			NA	Y	31	30		NA	NA	NA	0.595238	0.575758	0.384615	RKw17	RSr17	RKw17_2249.wav	0.514	768.1	1126.9	358.8	1042.6	115.09	768	1100	0.24	0.466926	1495.42	-98.1752	4.69e-05	1.10638	23.56	16.08	3.74	1078.1	1125
768	07_Kw17_Sr17	40	N	2	2	18	1	0	2	342	19	F	Chinese	N			NA	N	39	39		NA	NA	NA	0.666667	0.515152	0.512821	RKw17	RSr17	RKw17_2249.wav	0.514	768.1	1126.9	358.8	1042.6	115.09	768	1100	0.24	0.466926	1495.42	-98.1752	4.69e-05	1.10638	23.56	16.08	3.74	1078.1	1125
769	07_Kw17_Sr17	71	N	2	2	41	1	1	1	561	19	M	English	N			NA	Y	44	36		43	43	86	0.595238	0.424242	0.333333	RKw17	RSr17	RKw17_2249.wav	0.514	768.1	1126.9	358.8	1042.6	115.09	768	1100	0.24	0.466926	1495.42	-98.1752	4.69e-05	1.10638	23.56	16.08	3.74	1078.1	1125
770	07_Kw17_Sr17	20	Y	2	2	14	1	0	2	448	37	F	English	Y	Rhesus, chimpanzees, dogs, cats, mice, rats	180	132	Y	52	33		46	47	93	0.392857	0.454545	0.589744	RKw17	RSr17	RKw17_2249.wav	0.514	768.1	1126.9	358.8	1042.6	115.09	768	1100	0.24	0.466926	1495.42	-98.1752	4.69e-05	1.10638	23.56	16.08	3.74	1078.1	1125
771	07_Kw17_Sr17	50	N	2	4	10	1	0	2	150	19	F	English	Y	dogs, cats	12	NA	Y	53	40		24	19	43	0.5	0.212121	0.512821	RKw17	RSr17	RKw17_2249.wav	0.514	768.1	1126.9	358.8	1042.6	115.09	768	1100	0.24	0.466926	1495.42	-98.1752	4.69e-05	1.10638	23.56	16.08	3.74	1078.1	1125
772	07_Kw17_Sr17	109	N	2	3	38	1	0	2	533	20	F	English	N			NA	Y	41	33		45	43	88	0.666667	0.727273	0.384615	RKw17	RSr17	RKw17_2249.wav	0.514	768.1	1126.9	358.8	1042.6	115.09	768	1100	0.24	0.466926	1495.42	-98.1752	4.69e-05	1.10638	23.56	16.08	3.74	1078.1	1125
773	07_Kw17_Sr17	31	N	2	4	10	1	0	2	542	18	F	English	N			NA	Y	47	35		38	40	78	0.583333	0.575758	0.384615	RKw17	RSr17	RKw17_2249.wav	0.514	768.1	1126.9	358.8	1042.6	115.09	768	1100	0.24	0.466926	1495.42	-98.1752	4.69e-05	1.10638	23.56	16.08	3.74	1078.1	1125
774	07_Kw17_Sr17	47	N	2	3	34	1	0	2	326	18	F	English	N			NA	Y	60	42		42	45	87	0.47619	0.30303	0.333333	RKw17	RSr17	RKw17_2249.wav	0.514	768.1	1126.9	358.8	1042.6	115.09	768	1100	0.24	0.466926	1495.42	-98.1752	4.69e-05	1.10638	23.56	16.08	3.74	1078.1	1125
775	07_Kw17_Sr17	103	N	2	4	33	1	0	2	228	19	F	Korean + English	Y	dogs, cats	3	NA	Y	47	39		40	41	81	0.52381	0.393939	0.512821	RKw17	RSr17	RKw17_2249.wav	0.514	768.1	1126.9	358.8	1042.6	115.09	768	1100	0.24	0.466926	1495.42	-98.1752	4.69e-05	1.10638	23.56	16.08	3.74	1078.1	1125
776	07_Kw17_Sr17	85	N	2	1	1	1	0	2	108	19	F	Chinese	N			NA	Y	25	32		NA	NA	NA	0.571429	0.363636	0.435897	RKw17	RSr17	RKw17_2249.wav	0.514	768.1	1126.9	358.8	1042.6	115.09	768	1100	0.24	0.466926	1495.42	-98.1752	4.69e-05	1.10638	23.56	16.08	3.74	1078.1	1125
777	07_Kw17_Sr17	77	N	2	3	12	1	1	1	129	19	M	Chinese	N			NA	Y	46	18		NA	NA	NA	0.595238	0.454545	0.538462	RKw17	RSr17	RKw17_2249.wav	0.514	768.1	1126.9	358.8	1042.6	115.09	768	1100	0.24	0.466926	1495.42	-98.1752	4.69e-05	1.10638	23.56	16.08	3.74	1078.1	1125
778	07_Kw17_Sr17	112	N	2	2	27	1	0	2	1042	18	M	Turkish	N			NA	Y	55	40		NA	NA	NA	0.535714	0.424242	0.461538	RKw17	RSr17	RKw17_2249.wav	0.514	768.1	1126.9	358.8	1042.6	115.09	768	1100	0.24	0.466926	1495.42	-98.1752	4.69e-05	1.10638	23.56	16.08	3.74	1078.1	1125
779	07_Kw17_Sr17	36	N	2	3	13	1	0	2	241	19	F	English	Y	dogs, cats	4	NA	Y	53	31		42	42	84	0.416667	0.606061	0.435897	RKw17	RSr17	RKw17_2249.wav	0.514	768.1	1126.9	358.8	1042.6	115.09	768	1100	0.24	0.466926	1495.42	-98.1752	4.69e-05	1.10638	23.56	16.08	3.74	1078.1	1125
780	07_Kw17_Sr17	83	N	2	3	12	1	0	2	1619	19	F	English	N			NA	Y	55	46		48	46	94	0.5	0.333333	0.487179	RKw17	RSr17	RKw17_2249.wav	0.514	768.1	1126.9	358.8	1042.6	115.09	768	1100	0.24	0.466926	1495.42	-98.1752	4.69e-05	1.10638	23.56	16.08	3.74	1078.1	1125
781	07_Kw17_Sr17	30	N	2	1	4	1	0	2	95	19	F	Chinese	N			NA	N	43	31		NA	NA	NA	0.535714	0.151515	0.641026	RKw17	RSr17	RKw17_2249.wav	0.514	768.1	1126.9	358.8	1042.6	115.09	768	1100	0.24	0.466926	1495.42	-98.1752	4.69e-05	1.10638	23.56	16.08	3.74	1078.1	1125
782	07_Kw17_Sr17	63	N	2	4	4	1	0	2	327	19	F	English	N			NA	N	60	40		44	42	86	0.535714	0	0.717949	RKw17	RSr17	RKw17_2249.wav	0.514	768.1	1126.9	358.8	1042.6	115.09	768	1100	0.24	0.466926	1495.42	-98.1752	4.69e-05	1.10638	23.56	16.08	3.74	1078.1	1125
783	07_Kw17_Sr17	511	Y	2	1	1	1	0	2	2421	24	F	English	Y	Rhesus macaque, domestic cats	24	24	Y	NA	NA		NA	NA	NA	0.571429	0.69697	0.512821	RKw17	RSr17	RKw17_2249.wav	0.514	768.1	1126.9	358.8	1042.6	115.09	768	1100	0.24	0.466926	1495.42	-98.1752	4.69e-05	1.10638	23.56	16.08	3.74	1078.1	1125
784	07_Kw17_Sr17	76	N	2	4	40	1	1	1	146	19	F	Chinese	N			NA	Y	41	41		NA	NA	NA	0.630952	0.393939	0.538462	RKw17	RSr17	RKw17_2249.wav	0.514	768.1	1126.9	358.8	1042.6	115.09	768	1100	0.24	0.466926	1495.42	-98.1752	4.69e-05	1.10638	23.56	16.08	3.74	1078.1	1125
785	07_Kw17_Sr17	44	N	2	1	16	1	1	1	917	31	F	English	N			NA	Y	39	34		47	45	92	0.571429	0.606061	0.333333	RKw17	RSr17	RKw17_2249.wav	0.514	768.1	1126.9	358.8	1042.6	115.09	768	1100	0.24	0.466926	1495.42	-98.1752	4.69e-05	1.10638	23.56	16.08	3.74	1078.1	1125
786	07_Kw17_Sr17	27	N	2	4	11	1	1	1	113	23	F	Telugu	N			NA	N	32	44		NA	NA	NA	0.547619	0.151515	0.512821	RKw17	RSr17	RKw17_2249.wav	0.514	768.1	1126.9	358.8	1042.6	115.09	768	1100	0.24	0.466926	1495.42	-98.1752	4.69e-05	1.10638	23.56	16.08	3.74	1078.1	1125
787	07_Kw17_Sr17	61	N	2	4	42	1	0	2	209	19	M	English	N			NA	Y	42	36		43	35	78	0.619048	0.424242	0.461538	RKw17	RSr17	RKw17_2249.wav	0.514	768.1	1126.9	358.8	1042.6	115.09	768	1100	0.24	0.466926	1495.42	-98.1752	4.69e-05	1.10638	23.56	16.08	3.74	1078.1	1125
788	07_Kw17_Sr17	91	N	2	1	6	1	0	2	93	20	F	Chinese	N			NA	N	49	36		NA	NA	NA	0.547619	0.606061	0.641026	RKw17	RSr17	RKw17_2249.wav	0.514	768.1	1126.9	358.8	1042.6	115.09	768	1100	0.24	0.466926	1495.42	-98.1752	4.69e-05	1.10638	23.56	16.08	3.74	1078.1	1125
789	07_Kw17_Sr17	48	N	2	1	5	1	1	1	3134	19	F	English	N			NA	Y	33	36		36	46	82	0.654762	0.606061	0.564103	RKw17	RSr17	RKw17_2249.wav	0.514	768.1	1126.9	358.8	1042.6	115.09	768	1100	0.24	0.466926	1495.42	-98.1752	4.69e-05	1.10638	23.56	16.08	3.74	1078.1	1125
790	07_Kw17_Sr17	37	N	2	2	34	1	0	2	300	19	F	Spanish	N			NA	Y	44	32		NA	NA	NA	0.52381	0.606061	0.641026	RKw17	RSr17	RKw17_2249.wav	0.514	768.1	1126.9	358.8	1042.6	115.09	768	1100	0.24	0.466926	1495.42	-98.1752	4.69e-05	1.10638	23.56	16.08	3.74	1078.1	1125
791	07_Kw17_Sr17	49	N	2	4	8	1	0	2	512	18	F	English	N			NA	N	44	28		42	2	44	0.642857	0.454545	0.487179	RKw17	RSr17	RKw17_2249.wav	0.514	768.1	1126.9	358.8	1042.6	115.09	768	1100	0.24	0.466926	1495.42	-98.1752	4.69e-05	1.10638	23.56	16.08	3.74	1078.1	1125
792	07_Kw17_Sr17	75	N	2	2	9	1	0	2	914	19	M	Chinese	Y	fruitfly, termites	1.5	NA	N	58	38		NA	NA	NA	0.547619	0.484848	0.461538	RKw17	RSr17	RKw17_2249.wav	0.514	768.1	1126.9	358.8	1042.6	115.09	768	1100	0.24	0.466926	1495.42	-98.1752	4.69e-05	1.10638	23.56	16.08	3.74	1078.1	1125
793	07_Kw17_Sr17	104	N	2	1	14	1	0	2	1389	19	F	Bangla	N			NA	N	49	31		NA	NA	NA	0.619048	0.363636	0.384615	RKw17	RSr17	RKw17_2249.wav	0.514	768.1	1126.9	358.8	1042.6	115.09	768	1100	0.24	0.466926	1495.42	-98.1752	4.69e-05	1.10638	23.56	16.08	3.74	1078.1	1125
794	07_Kw17_Sr17	97	N	2	4	20	1	0	2	256	19	F	English	N			NA	Y	48	28		40	43	83	0.595238	0.606061	0.487179	RKw17	RSr17	RKw17_2249.wav	0.514	768.1	1126.9	358.8	1042.6	115.09	768	1100	0.24	0.466926	1495.42	-98.1752	4.69e-05	1.10638	23.56	16.08	3.74	1078.1	1125
795	07_Kw17_Sr17	3	N	2	2	10	1	0	2	656	28	M	English	N			NA	Y	39	30		45	42	87	0.559524	0.575758	0.487179	RKw17	RSr17	RKw17_2249.wav	0.514	768.1	1126.9	358.8	1042.6	115.09	768	1100	0.24	0.466926	1495.42	-98.1752	4.69e-05	1.10638	23.56	16.08	3.74	1078.1	1125
796	07_Kw17_Sr17	28	N	2	2	21	1	0	2	46	40	F	English	N			NA	Y	50	33		42	NA	NA	0.630952	0.606061	0.564103	RKw17	RSr17	RKw17_2249.wav	0.514	768.1	1126.9	358.8	1042.6	115.09	768	1100	0.24	0.466926	1495.42	-98.1752	4.69e-05	1.10638	23.56	16.08	3.74	1078.1	1125
797	07_Kw17_Sr17	25	N	2	3	23	1	0	2	1516	21	M	English	N			NA	N	56	32		34	41	75	0.5	0.575758	0.461538	RKw17	RSr17	RKw17_2249.wav	0.514	768.1	1126.9	358.8	1042.6	115.09	768	1100	0.24	0.466926	1495.42	-98.1752	4.69e-05	1.10638	23.56	16.08	3.74	1078.1	1125
798	07_Kw17_Sr17	62	N	2	4	23	1	0	2	237	18	F	English	Y	mice	1	NA	Y	59	32		46	40	86	0.559524	0.484848	0.538462	RKw17	RSr17	RKw17_2249.wav	0.514	768.1	1126.9	358.8	1042.6	115.09	768	1100	0.24	0.466926	1495.42	-98.1752	4.69e-05	1.10638	23.56	16.08	3.74	1078.1	1125
799	07_Kw17_Sr17	67	N	2	3	38	1	0	2	421	18	F	English	N			NA	N	29	44		32	32	64	0.75	0.636364	0.564103	RKw17	RSr17	RKw17_2249.wav	0.514	768.1	1126.9	358.8	1042.6	115.09	768	1100	0.24	0.466926	1495.42	-98.1752	4.69e-05	1.10638	23.56	16.08	3.74	1078.1	1125
800	07_Kw17_Sr17	42	N	2	2	6	1	0	2	52	19	F	English	N			NA	N	35	28		44	44	88	0.571429	0.454545	0.692308	RKw17	RSr17	RKw17_2249.wav	0.514	768.1	1126.9	358.8	1042.6	115.09	768	1100	0.24	0.466926	1495.42	-98.1752	4.69e-05	1.10638	23.56	16.08	3.74	1078.1	1125
801	07_Kw17_Sr17	70	N	2	3	19	1	0	2	315	18	F	English	N			NA	Y	62	34		48	45	93	0.52381	0.242424	0.384615	RKw17	RSr17	RKw17_2249.wav	0.514	768.1	1126.9	358.8	1042.6	115.09	768	1100	0.24	0.466926	1495.42	-98.1752	4.69e-05	1.10638	23.56	16.08	3.74	1078.1	1125
802	07_Kw17_Sr17	69	N	2	2	28	1	1	1	547	20	F	English	N			NA	Y	40	37		42	43	85	0.547619	0.424242	0.615385	RKw17	RSr17	RKw17_2249.wav	0.514	768.1	1126.9	358.8	1042.6	115.09	768	1100	0.24	0.466926	1495.42	-98.1752	4.69e-05	1.10638	23.56	16.08	3.74	1078.1	1125
803	07_Kw17_Sr17	114	N	2	1	18	1	0	2	297	19	M	English	N			NA	Y	58	35		36	38	74	0.607143	0.393939	0.512821	RKw17	RSr17	RKw17_2249.wav	0.514	768.1	1126.9	358.8	1042.6	115.09	768	1100	0.24	0.466926	1495.42	-98.1752	4.69e-05	1.10638	23.56	16.08	3.74	1078.1	1125
804	07_Kw17_Sr17	79	N	2	1	8	1	0	2	190	21	M	English	N			NA	Y	55	38		33	34	67	0.571429	0.393939	0.564103	RKw17	RSr17	RKw17_2249.wav	0.514	768.1	1126.9	358.8	1042.6	115.09	768	1100	0.24	0.466926	1495.42	-98.1752	4.69e-05	1.10638	23.56	16.08	3.74	1078.1	1125
805	07_Kw17_Sr17	108	N	2	2	34	1	0	2	316	19	M	English	N			NA	N	59	24		45	43	88	0.571429	0.393939	0.435897	RKw17	RSr17	RKw17_2249.wav	0.514	768.1	1126.9	358.8	1042.6	115.09	768	1100	0.24	0.466926	1495.42	-98.1752	4.69e-05	1.10638	23.56	16.08	3.74	1078.1	1125
806	07_Kw17_Sr17	72	N	2	3	10	1	1	1	435	19	F	English	N			NA	Y	48	33		35	31	66	0.511905	0.69697	0.538462	RKw17	RSr17	RKw17_2249.wav	0.514	768.1	1126.9	358.8	1042.6	115.09	768	1100	0.24	0.466926	1495.42	-98.1752	4.69e-05	1.10638	23.56	16.08	3.74	1078.1	1125
807	07_Kw17_Sr17	9	N	2	1	9	1	0	2	1583	19	M	English	Y	dogs, cats	3	NA	Y	41	31		35	32	67	0.416667	0.121212	0.435897	RKw17	RSr17	RKw17_2249.wav	0.514	768.1	1126.9	358.8	1042.6	115.09	768	1100	0.24	0.466926	1495.42	-98.1752	4.69e-05	1.10638	23.56	16.08	3.74	1078.1	1125
808	07_Kw17_Sr17	87	N	2	4	7	1	0	2	452	19	F	Korean	N			NA	Y	53	41		NA	NA	NA	0.654762	0.787879	0.615385	RKw17	RSr17	RKw17_2249.wav	0.514	768.1	1126.9	358.8	1042.6	115.09	768	1100	0.24	0.466926	1495.42	-98.1752	4.69e-05	1.10638	23.56	16.08	3.74	1078.1	1125
809	07_Kw17_Sr17	5	N	2	3	6	1	0	2	385	29	F	English	Y	cat, dog, horse, cow	6+ years	NA	Y	41	35		46	49	95	0.583333	0.393939	0.564103	RKw17	RSr17	RKw17_2249.wav	0.514	768.1	1126.9	358.8	1042.6	115.09	768	1100	0.24	0.466926	1495.42	-98.1752	4.69e-05	1.10638	23.56	16.08	3.74	1078.1	1125
810	07_Kw17_Sr17	92	N	2	2	35	1	0	2	70	18	F	English	N			NA	Y	45	30		36	36	72	0.595238	0.212121	0.589744	RKw17	RSr17	RKw17_2249.wav	0.514	768.1	1126.9	358.8	1042.6	115.09	768	1100	0.24	0.466926	1495.42	-98.1752	4.69e-05	1.10638	23.56	16.08	3.74	1078.1	1125
811	07_Kw17_Sr17	68	N	2	2	18	1	0	2	710	19	M	Spanish	N			NA	N	48	NA	didn't fill out this questionnaire animal	NA	NA	NA	0.607143	0.333333	0.641026	RKw17	RSr17	RKw17_2249.wav	0.514	768.1	1126.9	358.8	1042.6	115.09	768	1100	0.24	0.466926	1495.42	-98.1752	4.69e-05	1.10638	23.56	16.08	3.74	1078.1	1125
812	07_Kw17_Sr17	34	N	2	3	10	1	0	2	548	24	M	Mandarin	N			NA	N	15	37		NA	NA	NA	0.511905	0.757576	0.282051	RKw17	RSr17	RKw17_2249.wav	0.514	768.1	1126.9	358.8	1042.6	115.09	768	1100	0.24	0.466926	1495.42	-98.1752	4.69e-05	1.10638	23.56	16.08	3.74	1078.1	1125
813	07_Kw17_Sr17	8	N	2	1	10	1	0	2	965	19	F	English	Y	dogs, cats	24	NA	Y	58	40		39	43	82	0.595238	0.363636	0.589744	RKw17	RSr17	RKw17_2249.wav	0.514	768.1	1126.9	358.8	1042.6	115.09	768	1100	0.24	0.466926	1495.42	-98.1752	4.69e-05	1.10638	23.56	16.08	3.74	1078.1	1125
814	07_Kw17_Sr17	508	Y	2	2	6	1	0	2	1481	40	F	English	Y	Rhesus macaque, pigtail macaque, sooty mangabey	192	120	Y	NA	NA		NA	NA	NA	0.511905	0.969697	0.641026	RKw17	RSr17	RKw17_2249.wav	0.514	768.1	1126.9	358.8	1042.6	115.09	768	1100	0.24	0.466926	1495.42	-98.1752	4.69e-05	1.10638	23.56	16.08	3.74	1078.1	1125
815	07_Kw17_Sr17	93	N	2	1	27	1	0	2	960	19	F	English	N			NA	Y	53	37		38	38	76	0.52381	0.30303	0.487179	RKw17	RSr17	RKw17_2249.wav	0.514	768.1	1126.9	358.8	1042.6	115.09	768	1100	0.24	0.466926	1495.42	-98.1752	4.69e-05	1.10638	23.56	16.08	3.74	1078.1	1125
816	07_Kw17_Sr17	102	N	2	1	27	1	0	2	62	18	F	English	Y	elephants, dogs, tortoises	3	NA	Y	46	44		33	36	69	0.559524	0.424242	0.461538	RKw17	RSr17	RKw17_2249.wav	0.514	768.1	1126.9	358.8	1042.6	115.09	768	1100	0.24	0.466926	1495.42	-98.1752	4.69e-05	1.10638	23.56	16.08	3.74	1078.1	1125
817	07_Kw17_Sr17	60	N	2	2	30	1	0	2	252	18	F	Chinese	N			NA	Y	54	33		NA	NA	NA	0.595238	0.69697	0.615385	RKw17	RSr17	RKw17_2249.wav	0.514	768.1	1126.9	358.8	1042.6	115.09	768	1100	0.24	0.466926	1495.42	-98.1752	4.69e-05	1.10638	23.56	16.08	3.74	1078.1	1125
818	07_Kw17_Sr17	98	N	2	4	23	1	0	2	225	18	F	English	N			NA	Y	36	39		37	48	85	0.690476	0.393939	0.538462	RKw17	RSr17	RKw17_2249.wav	0.514	768.1	1126.9	358.8	1042.6	115.09	768	1100	0.24	0.466926	1495.42	-98.1752	4.69e-05	1.10638	23.56	16.08	3.74	1078.1	1125
819	07_Kw17_Sr17	65	N	2	2	8	1	0	2	295	20	F	Arabic	Y			NA	N	36	35		NA	NA	NA	0.559524	0.363636	0.564103	RKw17	RSr17	RKw17_2249.wav	0.514	768.1	1126.9	358.8	1042.6	115.09	768	1100	0.24	0.466926	1495.42	-98.1752	4.69e-05	1.10638	23.56	16.08	3.74	1078.1	1125
820	07_Kw17_Sr17	32	N	2	1	13	1	0	2	399	23	F	English	N			NA	N	58	26		34	33	67	0.559524	0.424242	0.435897	RKw17	RSr17	RKw17_2249.wav	0.514	768.1	1126.9	358.8	1042.6	115.09	768	1100	0.24	0.466926	1495.42	-98.1752	4.69e-05	1.10638	23.56	16.08	3.74	1078.1	1125
821	07_Kw17_Sr17	38	N	2	4	8	1	0	2	251	18	F	English	N			NA	Y	57	36		41	41	82	0.619048	0.606061	0.615385	RKw17	RSr17	RKw17_2249.wav	0.514	768.1	1126.9	358.8	1042.6	115.09	768	1100	0.24	0.466926	1495.42	-98.1752	4.69e-05	1.10638	23.56	16.08	3.74	1078.1	1125
822	07_Kw17_Sr17	35	N	2	1	38	1	1	1	708	19	M	English	N			NA	N	40	21		44	39	83	0.666667	0.818182	0.641026	RKw17	RSr17	RKw17_2249.wav	0.514	768.1	1126.9	358.8	1042.6	115.09	768	1100	0.24	0.466926	1495.42	-98.1752	4.69e-05	1.10638	23.56	16.08	3.74	1078.1	1125
823	07_Kw17_Sr17	88	N	2	1	41	1	0	2	47	19	M	Mandarin	N			NA	Y	49	27		NA	NA	NA	0.547619	0.818182	0.538462	RKw17	RSr17	RKw17_2249.wav	0.514	768.1	1126.9	358.8	1042.6	115.09	768	1100	0.24	0.466926	1495.42	-98.1752	4.69e-05	1.10638	23.56	16.08	3.74	1078.1	1125
824	07_Kw17_Sr17	113	N	2	3	2	1	0	2	184	18	F	English	N			NA	Y	52	38		47	41	88	0.583333	0.848485	0.564103	RKw17	RSr17	RKw17_2249.wav	0.514	768.1	1126.9	358.8	1042.6	115.09	768	1100	0.24	0.466926	1495.42	-98.1752	4.69e-05	1.10638	23.56	16.08	3.74	1078.1	1125
825	07_Kw17_Sr17	59	N	2	1	40	1	0	2	176	18	M	Gujarati	N			NA	N	37	38		NA	NA	NA	0.52381	0.393939	0.666667	RKw17	RSr17	RKw17_2249.wav	0.514	768.1	1126.9	358.8	1042.6	115.09	768	1100	0.24	0.466926	1495.42	-98.1752	4.69e-05	1.10638	23.56	16.08	3.74	1078.1	1125
826	07_Kw17_Sr17	12	N	2	4	12	1	0	2	1133	21	M	Chinese	N			NA	Y	41	34		NA	NA	NA	0.642857	0.484848	0.410256	RKw17	RSr17	RKw17_2249.wav	0.514	768.1	1126.9	358.8	1042.6	115.09	768	1100	0.24	0.466926	1495.42	-98.1752	4.69e-05	1.10638	23.56	16.08	3.74	1078.1	1125
827	07_Kw17_Sr17	99	N	2	1	7	1	0	2	278	19	F	English + Hindi	N			NA	Y	56	37		37	39	76	0.595238	0.30303	0.461538	RKw17	RSr17	RKw17_2249.wav	0.514	768.1	1126.9	358.8	1042.6	115.09	768	1100	0.24	0.466926	1495.42	-98.1752	4.69e-05	1.10638	23.56	16.08	3.74	1078.1	1125
828	07_Kw17_Sr17	90	N	2	3	10	1	0	2	266	21	M	English	N			NA	N	43	24		42	42	84	0.52381	0.69697	0.641026	RKw17	RSr17	RKw17_2249.wav	0.514	768.1	1126.9	358.8	1042.6	115.09	768	1100	0.24	0.466926	1495.42	-98.1752	4.69e-05	1.10638	23.56	16.08	3.74	1078.1	1125
829	07_Kw17_Sr17	94	N	2	2	26	1	0	2	1249	20	F	English	N			NA	Y	45	44		40	44	84	0.72619	0.878788	0.410256	RKw17	RSr17	RKw17_2249.wav	0.514	768.1	1126.9	358.8	1042.6	115.09	768	1100	0.24	0.466926	1495.42	-98.1752	4.69e-05	1.10638	23.56	16.08	3.74	1078.1	1125
830	07_Kw17_Sr17	16	N	2	1	13	1	0	2	346	21	F	English	Y	dogs, cats	6	NA	Y	44	43		38	40	78	0.559524	0.545455	0.461538	RKw17	RSr17	RKw17_2249.wav	0.514	768.1	1126.9	358.8	1042.6	115.09	768	1100	0.24	0.466926	1495.42	-98.1752	4.69e-05	1.10638	23.56	16.08	3.74	1078.1	1125
831	07_Kw17_Sr17	73	N	2	1	33	1	0	2	21	19	F	English and Chinese	N			NA	Y	41	37		34	36	70	0.571429	0.575758	0.538462	RKw17	RSr17	RKw17_2249.wav	0.514	768.1	1126.9	358.8	1042.6	115.09	768	1100	0.24	0.466926	1495.42	-98.1752	4.69e-05	1.10638	23.56	16.08	3.74	1078.1	1125
832	07_Kw17_Sr17	95	N	2	2	15	1	0	2	315	20	F	English	N			NA	Y	57	30		39	44	83	0.571429	0.363636	0.564103	RKw17	RSr17	RKw17_2249.wav	0.514	768.1	1126.9	358.8	1042.6	115.09	768	1100	0.24	0.466926	1495.42	-98.1752	4.69e-05	1.10638	23.56	16.08	3.74	1078.1	1125
833	07_Kw17_Sr17	24	N	2	2	15	1	0	2	376	20	M	English	N			NA	N	41	24		35	36	71	0.404762	0.363636	0.666667	RKw17	RSr17	RKw17_2249.wav	0.514	768.1	1126.9	358.8	1042.6	115.09	768	1100	0.24	0.466926	1495.42	-98.1752	4.69e-05	1.10638	23.56	16.08	3.74	1078.1	1125
834	07_Kw17_Sr17	7	N	2	1	37	1	1	1	620	21	F	English	N			NA	Y	49	33		44	43	87	0.583333	0.363636	0.615385	RKw17	RSr17	RKw17_2249.wav	0.514	768.1	1126.9	358.8	1042.6	115.09	768	1100	0.24	0.466926	1495.42	-98.1752	4.69e-05	1.10638	23.56	16.08	3.74	1078.1	1125
835	07_Kw17_Sr17	86	N	2	1	41	1	0	2	311	22	M	Chinese	N			NA	Y	44	35		NA	NA	NA	0.666667	0.515152	0.641026	RKw17	RSr17	RKw17_2249.wav	0.514	768.1	1126.9	358.8	1042.6	115.09	768	1100	0.24	0.466926	1495.42	-98.1752	4.69e-05	1.10638	23.56	16.08	3.74	1078.1	1125
836	07_Kw17_Sr17	26	N	2	1	17	1	0	2	263	24	M	Telugu	N			NA	N	41	35		NA	NA	NA	0.607143	0.515152	0.538462	RKw17	RSr17	RKw17_2249.wav	0.514	768.1	1126.9	358.8	1042.6	115.09	768	1100	0.24	0.466926	1495.42	-98.1752	4.69e-05	1.10638	23.56	16.08	3.74	1078.1	1125
837	07_Kw17_Sr17	10	N	2	3	20	1	0	2	449	21	F	English	N			NA	Y	50	38		36	38	74	0.559524	0.757576	0.358974	RKw17	RSr17	RKw17_2249.wav	0.514	768.1	1126.9	358.8	1042.6	115.09	768	1100	0.24	0.466926	1495.42	-98.1752	4.69e-05	1.10638	23.56	16.08	3.74	1078.1	1125
838	07_Kw17_Sr17	506	Y	2	2	18	1	0	2	535	37	F	English	Y	Rhesus macaque	120	120	Y	NA	NA		NA	NA	NA	0.559524	0.424242	0.487179	RKw17	RSr17	RKw17_2249.wav	0.514	768.1	1126.9	358.8	1042.6	115.09	768	1100	0.24	0.466926	1495.42	-98.1752	4.69e-05	1.10638	23.56	16.08	3.74	1078.1	1125
839	07_Kw17_Sr17	1	N	2	1	6	1	0	2	395	20	F	English	Y	cats, dogs	12	NA	Y	38	33		NA	40	NA	0.642857	0.333333	0.564103	RKw17	RSr17	RKw17_2249.wav	0.514	768.1	1126.9	358.8	1042.6	115.09	768	1100	0.24	0.466926	1495.42	-98.1752	4.69e-05	1.10638	23.56	16.08	3.74	1078.1	1125
840	07_Kw17_Sr17	66	N	2	2	37	1	0	2	3686	20	M	Chinese	N			NA	N	41	38		NA	NA	NA	0.47619	0.69697	0.512821	RKw17	RSr17	RKw17_2249.wav	0.514	768.1	1126.9	358.8	1042.6	115.09	768	1100	0.24	0.466926	1495.42	-98.1752	4.69e-05	1.10638	23.56	16.08	3.74	1078.1	1125
841	07_Kw17_Sr17	39	N	2	3	40	1	0	2	106	19	F	Spanish/English	N			NA	Y	55	38		41	43	84	0.583333	0.454545	0.538462	RKw17	RSr17	RKw17_2249.wav	0.514	768.1	1126.9	358.8	1042.6	115.09	768	1100	0.24	0.466926	1495.42	-98.1752	4.69e-05	1.10638	23.56	16.08	3.74	1078.1	1125
842	07_Kw17_Sr17	58	N	2	1	21	1	0	2	1496	21	F	Spanish	Y	mice, rats	2	NA	Y	53	33		NA	NA	NA	0.547619	0.515152	0.461538	RKw17	RSr17	RKw17_2249.wav	0.514	768.1	1126.9	358.8	1042.6	115.09	768	1100	0.24	0.466926	1495.42	-98.1752	4.69e-05	1.10638	23.56	16.08	3.74	1078.1	1125
843	07_Kw17_Sr17	81	N	2	4	32	1	0	2	223	18	F	English	N			NA	Y	53	33		43	51	94	0.690476	0.454545	0.538462	RKw17	RSr17	RKw17_2249.wav	0.514	768.1	1126.9	358.8	1042.6	115.09	768	1100	0.24	0.466926	1495.42	-98.1752	4.69e-05	1.10638	23.56	16.08	3.74	1078.1	1125
844	07_Kw17_Sr17	64	N	2	4	27	1	1	1	1874	18	F	English	N			NA	N	55	36		40	42	82	0.654762	0.393939	0.666667	RKw17	RSr17	RKw17_2249.wav	0.514	768.1	1126.9	358.8	1042.6	115.09	768	1100	0.24	0.466926	1495.42	-98.1752	4.69e-05	1.10638	23.56	16.08	3.74	1078.1	1125
845	07_Kw17_Sr17	505	Y	2	2	32	1	1	1	2427	30	F	English	Y	Rhesus macaque, horses, dogs, cats, birds, mangabey	120	94	Y	NA	NA		NA	NA	NA	0.595238	1	0.589744	RKw17	RSr17	RKw17_2249.wav	0.514	768.1	1126.9	358.8	1042.6	115.09	768	1100	0.24	0.466926	1495.42	-98.1752	4.69e-05	1.10638	23.56	16.08	3.74	1078.1	1125
846	07_Kw17_Sr17	100	N	2	3	25	1	0	2	1580	21	F	Mandarin	N			NA	Y	50	36		NA	NA	NA	0.619048	0.424242	0.641026	RKw17	RSr17	RKw17_2249.wav	0.514	768.1	1126.9	358.8	1042.6	115.09	768	1100	0.24	0.466926	1495.42	-98.1752	4.69e-05	1.10638	23.56	16.08	3.74	1078.1	1125
847	07_Kw17_Sr17	46	N	2	3	9	1	0	2	340	18	F	English	N			NA	Y	45	25		39	42	81	0.619048	0.515152	0.589744	RKw17	RSr17	RKw17_2249.wav	0.514	768.1	1126.9	358.8	1042.6	115.09	768	1100	0.24	0.466926	1495.42	-98.1752	4.69e-05	1.10638	23.56	16.08	3.74	1078.1	1125
848	07_Kw17_Sr17	105	N	2	2	32	1	0	2	470	19	F	English	N			NA	Y	44	36		40	42	82	0.571429	0.606061	0.435897	RKw17	RSr17	RKw17_2249.wav	0.514	768.1	1126.9	358.8	1042.6	115.09	768	1100	0.24	0.466926	1495.42	-98.1752	4.69e-05	1.10638	23.56	16.08	3.74	1078.1	1125
849	07_Kw17_Sr17	14	N	2	1	6	1	1	1	940	19	M	English and Mandarin	N			NA	N	43	35		32	39	71	0.642857	0.818182	0.615385	RKw17	RSr17	RKw17_2249.wav	0.514	768.1	1126.9	358.8	1042.6	115.09	768	1100	0.24	0.466926	1495.42	-98.1752	4.69e-05	1.10638	23.56	16.08	3.74	1078.1	1125
850	07_Kw17_Sr17	53	N	2	1	37	1	0	2	215	18	F	English	N			NA	N	71	47		22	17	39	0.642857	0.787879	0.641026	RKw17	RSr17	RKw17_2249.wav	0.514	768.1	1126.9	358.8	1042.6	115.09	768	1100	0.24	0.466926	1495.42	-98.1752	4.69e-05	1.10638	23.56	16.08	3.74	1078.1	1125
851	07_Kw17_Sr17	22	N	2	1	30	1	0	2	2334	31	F	English	Y	dogs, cats	6	NA	Y	56	49		47	46	93	0.452381	0.515152	0.692308	RKw17	RSr17	RKw17_2249.wav	0.514	768.1	1126.9	358.8	1042.6	115.09	768	1100	0.24	0.466926	1495.42	-98.1752	4.69e-05	1.10638	23.56	16.08	3.74	1078.1	1125
852	07_Kw17_Sr17	110	N	2	1	37	1	1	1	1137	19	M	English	N			NA	Y	40	32		35	38	73	0.511905	0.69697	0.564103	RKw17	RSr17	RKw17_2249.wav	0.514	768.1	1126.9	358.8	1042.6	115.09	768	1100	0.24	0.466926	1495.42	-98.1752	4.69e-05	1.10638	23.56	16.08	3.74	1078.1	1125
853	07_Kw17_Sr17	51	N	2	1	14	1	0	2	477	18	F	English	N			NA	Y	31	36		45	44	89	0.654762	0.515152	0.615385	RKw17	RSr17	RKw17_2249.wav	0.514	768.1	1126.9	358.8	1042.6	115.09	768	1100	0.24	0.466926	1495.42	-98.1752	4.69e-05	1.10638	23.56	16.08	3.74	1078.1	1125
854	07_Kw17_Sr17	82	N	2	2	24	1	0	2	233	18	F	Korean	Y	dogs, cats	3	NA	Y	31	40		NA	NA	NA	0.559524	0.333333	0.641026	RKw17	RSr17	RKw17_2249.wav	0.514	768.1	1126.9	358.8	1042.6	115.09	768	1100	0.24	0.466926	1495.42	-98.1752	4.69e-05	1.10638	23.56	16.08	3.74	1078.1	1125
855	07_Kw17_Sr17	6	N	2	1	15	1	0	2	434	23	M	English	Y	mice	3	NA	Y	31	28		38	41	79	0.595238	0.484848	0.589744	RKw17	RSr17	RKw17_2249.wav	0.514	768.1	1126.9	358.8	1042.6	115.09	768	1100	0.24	0.466926	1495.42	-98.1752	4.69e-05	1.10638	23.56	16.08	3.74	1078.1	1125
856	07_Kw17_Sr17	11	N	2	4	30	1	0	2	1478	20	F	English (mainly) + Hindi	Y	dogs	6	NA	Y	66	45	noted w/ regard to coos that it is upsetting - sounds like they're in pain. Noted surpirse that screams would be more intense context than coos	34	41	75	0.666667	0.545455	0.641026	RKw17	RSr17	RKw17_2249.wav	0.514	768.1	1126.9	358.8	1042.6	115.09	768	1100	0.24	0.466926	1495.42	-98.1752	4.69e-05	1.10638	23.56	16.08	3.74	1078.1	1125
857	07_Kw17_Sr17	80	N	2	4	2	1	0	2	1683	18	F	English	N			NA	Y	57	34		36	3	39	0.607143	0.545455	0.358974	RKw17	RSr17	RKw17_2249.wav	0.514	768.1	1126.9	358.8	1042.6	115.09	768	1100	0.24	0.466926	1495.42	-98.1752	4.69e-05	1.10638	23.56	16.08	3.74	1078.1	1125
858	07_Kw17_Sr17	18	N	2	2	33	1	1	1	1573	20	F	English	N			NA	Y	44	35		32	42	74	0.571429	0.151515	0.333333	RKw17	RSr17	RKw17_2249.wav	0.514	768.1	1126.9	358.8	1042.6	115.09	768	1100	0.24	0.466926	1495.42	-98.1752	4.69e-05	1.10638	23.56	16.08	3.74	1078.1	1125
859	07_Kw17_Sr17	13	N	2	4	5	1	0	2	182	19	F	English	N			NA	N	21	34		42	41	83	0.5	0.666667	0.487179	RKw17	RSr17	RKw17_2249.wav	0.514	768.1	1126.9	358.8	1042.6	115.09	768	1100	0.24	0.466926	1495.42	-98.1752	4.69e-05	1.10638	23.56	16.08	3.74	1078.1	1125
860	07_Kw17_Sr17	33	N	2	2	22	1	0	2	232	19	F	Mandarin + English	N			NA	Y	56	33		NA	NA	NA	0.571429	0.272727	0.615385	RKw17	RSr17	RKw17_2249.wav	0.514	768.1	1126.9	358.8	1042.6	115.09	768	1100	0.24	0.466926	1495.42	-98.1752	4.69e-05	1.10638	23.56	16.08	3.74	1078.1	1125
861	07_Kw17_Sr17	510	Y	2	1	29	1	0	2	641	30	M	English	Y	Rhesus macaque, Sooty mangabey	60	60	Y	NA	NA	asked for more clarification on "intense emotion" ~3 min into task	NA	NA	NA	0.511905	0.727273	0.717949	RKw17	RSr17	RKw17_2249.wav	0.514	768.1	1126.9	358.8	1042.6	115.09	768	1100	0.24	0.466926	1495.42	-98.1752	4.69e-05	1.10638	23.56	16.08	3.74	1078.1	1125
862	07_Kw17_Sr17	41	N	2	4	23	1	1	1	340	20	M	Vietnamese	N			NA	Y	45	29		NA	NA	NA	0.630952	0.454545	0.435897	RKw17	RSr17	RKw17_2249.wav	0.514	768.1	1126.9	358.8	1042.6	115.09	768	1100	0.24	0.466926	1495.42	-98.1752	4.69e-05	1.10638	23.56	16.08	3.74	1078.1	1125
863	07_Kw17_Sr17	19	N	2	3	31	1	0	2	319	51	F	English	Y	mice	240	NA	Y	36	29		43	47	90	0.511905	0.575758	0.487179	RKw17	RSr17	RKw17_2249.wav	0.514	768.1	1126.9	358.8	1042.6	115.09	768	1100	0.24	0.466926	1495.42	-98.1752	4.69e-05	1.10638	23.56	16.08	3.74	1078.1	1125
864	07_Kw17_Sr17	507	Y	2	1	5	1	1	1	1506	27	F	English	Y	Rhesus macaque, tufted capuchins	60	48	Y	NA	NA		NA	NA	NA	0.547619	1	0.666667	RKw17	RSr17	RKw17_2249.wav	0.514	768.1	1126.9	358.8	1042.6	115.09	768	1100	0.24	0.466926	1495.42	-98.1752	4.69e-05	1.10638	23.56	16.08	3.74	1078.1	1125
865	07_Kw17_Sr17	23	N	2	3	42	1	0	2	833	20	F	Mandarin	N			NA	N	38	33		NA	NA	NA	0.52381	0.575758	0.564103	RKw17	RSr17	RKw17_2249.wav	0.514	768.1	1126.9	358.8	1042.6	115.09	768	1100	0.24	0.466926	1495.42	-98.1752	4.69e-05	1.10638	23.56	16.08	3.74	1078.1	1125
866	07_Kw17_Sr17	501	Y	2	4	16	1	0	2	413	26	M	English	Y	lemurs (black white ruffed, ringtail, red bellied, crown, mongoose), Rhesus monkeys, gorillas, orangutans	Lemur: 24, Rh: 48, Gorilla: 12, Orangutan: 12	48	Y	47	37		46	44	90	0.559524	0.69697	0.461538	RKw17	RSr17	RKw17_2249.wav	0.514	768.1	1126.9	358.8	1042.6	115.09	768	1100	0.24	0.466926	1495.42	-98.1752	4.69e-05	1.10638	23.56	16.08	3.74	1078.1	1125
867	07_Kw17_Sr17	107	N	2	4	10	1	0	2	4613	22	F	Chinese	N			NA	N	21	37		NA	NA	NA	0.595238	0.424242	0.435897	RKw17	RSr17	RKw17_2249.wav	0.514	768.1	1126.9	358.8	1042.6	115.09	768	1100	0.24	0.466926	1495.42	-98.1752	4.69e-05	1.10638	23.56	16.08	3.74	1078.1	1125
868	07_Kw17_Sr17	111	N	2	3	13	1	0	2	417	21	F	English	N			NA	N	39	39		40	36	76	0.511905	0.575758	0.512821	RKw17	RSr17	RKw17_2249.wav	0.514	768.1	1126.9	358.8	1042.6	115.09	768	1100	0.24	0.466926	1495.42	-98.1752	4.69e-05	1.10638	23.56	16.08	3.74	1078.1	1125
869	07_Kw17_Sr17	55	N	2	4	7	1	0	2	457	18	F	Mandarin	N			NA	Y	64	30		NA	NA	NA	0.690476	0.515152	0.410256	RKw17	RSr17	RKw17_2249.wav	0.514	768.1	1126.9	358.8	1042.6	115.09	768	1100	0.24	0.466926	1495.42	-98.1752	4.69e-05	1.10638	23.56	16.08	3.74	1078.1	1125
870	07_Kw17_Sr17	15	N	2	4	35	1	0	2	2062	20	F	English and Chinese	N			NA	Y	58	36	didn't make it to face - just voice	NA	36	NA	0.488095	0.393939	0.461538	RKw17	RSr17	RKw17_2249.wav	0.514	768.1	1126.9	358.8	1042.6	115.09	768	1100	0.24	0.466926	1495.42	-98.1752	4.69e-05	1.10638	23.56	16.08	3.74	1078.1	1125
871	07_Kw17_Sr17	2	N	2	3	2	1	0	2	288	19	F	English	N			NA	Y	49	42		36	37	73	0.595238	0.0606061	0.641026	RKw17	RSr17	RKw17_2249.wav	0.514	768.1	1126.9	358.8	1042.6	115.09	768	1100	0.24	0.466926	1495.42	-98.1752	4.69e-05	1.10638	23.56	16.08	3.74	1078.1	1125
872	07_Kw17_Sr17	84	N	2	3	33	1	0	2	386	19	F	English	N			NA	Y	34	36		35	37	72	0.547619	0.575758	0.512821	RKw17	RSr17	RKw17_2249.wav	0.514	768.1	1126.9	358.8	1042.6	115.09	768	1100	0.24	0.466926	1495.42	-98.1752	4.69e-05	1.10638	23.56	16.08	3.74	1078.1	1125
873	07_Kw17_Sr17	513	Y	2	1	29	1	0	2	584	53	F	English	Y	chimps, bonobos, Rhesus macaque, Sooty mangabeys, pigtail macaque, gibbons, orangutan, stumptail macaques, baboons	288	288	Y	NA	NA		NA	NA	NA	0.535714	0.969697	0.589744	RKw17	RSr17	RKw17_2249.wav	0.514	768.1	1126.9	358.8	1042.6	115.09	768	1100	0.24	0.466926	1495.42	-98.1752	4.69e-05	1.10638	23.56	16.08	3.74	1078.1	1125
874	07_Kw17_Sr17	78	N	2	2	11	1	0	2	266	20	M	Spanish	Y	dogs, snakes	2	NA	Y	45	35		NA	NA	NA	0.547619	0.424242	0.487179	RKw17	RSr17	RKw17_2249.wav	0.514	768.1	1126.9	358.8	1042.6	115.09	768	1100	0.24	0.466926	1495.42	-98.1752	4.69e-05	1.10638	23.56	16.08	3.74	1078.1	1125
875	07_Kw17_Sr17	54	N	2	1	1	1	0	2	113	18	F	Chinese	N			NA	N	35	41		NA	NA	NA	0.535714	0.424242	0.538462	RKw17	RSr17	RKw17_2249.wav	0.514	768.1	1126.9	358.8	1042.6	115.09	768	1100	0.24	0.466926	1495.42	-98.1752	4.69e-05	1.10638	23.56	16.08	3.74	1078.1	1125
876	08_Ur16_Kw17	112	N	2	2	19	2	1	2	249	18	M	Turkish	N			NA	Y	55	40		NA	NA	NA	0.535714	0.424242	0.461538	RKw17	RUr16	RUr16_2301.wav	0.448	721.6	839	117.4	807.3	26.04	724	808	0.13	0.290179	884.615	-97.4843	2.11e-05	0.821535	45.06	17.96	3.36	1593.8	1640.6
877	08_Ur16_Kw17	79	N	2	1	2	2	1	2	203	21	M	English	N			NA	Y	55	38		33	34	67	0.571429	0.393939	0.564103	RKw17	RUr16	RUr16_2301.wav	0.448	721.6	839	117.4	807.3	26.04	724	808	0.13	0.290179	884.615	-97.4843	2.11e-05	0.821535	45.06	17.96	3.36	1593.8	1640.6
878	08_Ur16_Kw17	89	N	2	1	4	2	1	2	543	18	F	Spanish	N			NA	Y	50	37		NA	NA	NA	0.619048	0.818182	0.589744	RKw17	RUr16	RUr16_2301.wav	0.448	721.6	839	117.4	807.3	26.04	724	808	0.13	0.290179	884.615	-97.4843	2.11e-05	0.821535	45.06	17.96	3.36	1593.8	1640.6
879	08_Ur16_Kw17	23	N	2	3	13	2	0	1	749	20	F	Mandarin	N			NA	N	38	33		NA	NA	NA	0.52381	0.575758	0.564103	RKw17	RUr16	RUr16_2301.wav	0.448	721.6	839	117.4	807.3	26.04	724	808	0.13	0.290179	884.615	-97.4843	2.11e-05	0.821535	45.06	17.96	3.36	1593.8	1640.6
880	08_Ur16_Kw17	51	N	2	1	41	2	1	2	363	18	F	English	N			NA	Y	31	36		45	44	89	0.654762	0.515152	0.615385	RKw17	RUr16	RUr16_2301.wav	0.448	721.6	839	117.4	807.3	26.04	724	808	0.13	0.290179	884.615	-97.4843	2.11e-05	0.821535	45.06	17.96	3.36	1593.8	1640.6
881	08_Ur16_Kw17	12	N	2	4	3	2	1	2	109	21	M	Chinese	N			NA	Y	41	34		NA	NA	NA	0.642857	0.484848	0.410256	RKw17	RUr16	RUr16_2301.wav	0.448	721.6	839	117.4	807.3	26.04	724	808	0.13	0.290179	884.615	-97.4843	2.11e-05	0.821535	45.06	17.96	3.36	1593.8	1640.6
882	08_Ur16_Kw17	1	N	2	1	12	2	1	2	177	20	F	English	Y	cats, dogs	12	NA	Y	38	33		NA	40	NA	0.642857	0.333333	0.564103	RKw17	RUr16	RUr16_2301.wav	0.448	721.6	839	117.4	807.3	26.04	724	808	0.13	0.290179	884.615	-97.4843	2.11e-05	0.821535	45.06	17.96	3.36	1593.8	1640.6
883	08_Ur16_Kw17	74	N	2	4	34	2	1	2	474	19	F	English	Y	cats, dogs	1	NA	Y	47	41		41	43	84	0.428571	0.272727	0.538462	RKw17	RUr16	RUr16_2301.wav	0.448	721.6	839	117.4	807.3	26.04	724	808	0.13	0.290179	884.615	-97.4843	2.11e-05	0.821535	45.06	17.96	3.36	1593.8	1640.6
884	08_Ur16_Kw17	92	N	2	2	13	2	1	2	89	18	F	English	N			NA	Y	45	30		36	36	72	0.595238	0.212121	0.589744	RKw17	RUr16	RUr16_2301.wav	0.448	721.6	839	117.4	807.3	26.04	724	808	0.13	0.290179	884.615	-97.4843	2.11e-05	0.821535	45.06	17.96	3.36	1593.8	1640.6
885	08_Ur16_Kw17	88	N	2	1	6	2	1	2	315	19	M	Mandarin	N			NA	Y	49	27		NA	NA	NA	0.547619	0.818182	0.538462	RKw17	RUr16	RUr16_2301.wav	0.448	721.6	839	117.4	807.3	26.04	724	808	0.13	0.290179	884.615	-97.4843	2.11e-05	0.821535	45.06	17.96	3.36	1593.8	1640.6
886	08_Ur16_Kw17	113	N	2	3	16	2	0	1	1261	18	F	English	N			NA	Y	52	38		47	41	88	0.583333	0.848485	0.564103	RKw17	RUr16	RUr16_2301.wav	0.448	721.6	839	117.4	807.3	26.04	724	808	0.13	0.290179	884.615	-97.4843	2.11e-05	0.821535	45.06	17.96	3.36	1593.8	1640.6
887	08_Ur16_Kw17	109	N	2	3	9	2	1	2	524	20	F	English	N			NA	Y	41	33		45	43	88	0.666667	0.727273	0.384615	RKw17	RUr16	RUr16_2301.wav	0.448	721.6	839	117.4	807.3	26.04	724	808	0.13	0.290179	884.615	-97.4843	2.11e-05	0.821535	45.06	17.96	3.36	1593.8	1640.6
888	08_Ur16_Kw17	34	N	2	3	7	2	1	2	403	24	M	Mandarin	N			NA	N	15	37		NA	NA	NA	0.511905	0.757576	0.282051	RKw17	RUr16	RUr16_2301.wav	0.448	721.6	839	117.4	807.3	26.04	724	808	0.13	0.290179	884.615	-97.4843	2.11e-05	0.821535	45.06	17.96	3.36	1593.8	1640.6
889	08_Ur16_Kw17	70	N	2	3	15	2	1	2	414	18	F	English	N			NA	Y	62	34		48	45	93	0.52381	0.242424	0.384615	RKw17	RUr16	RUr16_2301.wav	0.448	721.6	839	117.4	807.3	26.04	724	808	0.13	0.290179	884.615	-97.4843	2.11e-05	0.821535	45.06	17.96	3.36	1593.8	1640.6
890	08_Ur16_Kw17	22	N	2	1	41	2	0	1	1175	31	F	English	Y	dogs, cats	6	NA	Y	56	49		47	46	93	0.452381	0.515152	0.692308	RKw17	RUr16	RUr16_2301.wav	0.448	721.6	839	117.4	807.3	26.04	724	808	0.13	0.290179	884.615	-97.4843	2.11e-05	0.821535	45.06	17.96	3.36	1593.8	1640.6
891	08_Ur16_Kw17	46	N	2	3	41	2	1	2	445	18	F	English	N			NA	Y	45	25		39	42	81	0.619048	0.515152	0.589744	RKw17	RUr16	RUr16_2301.wav	0.448	721.6	839	117.4	807.3	26.04	724	808	0.13	0.290179	884.615	-97.4843	2.11e-05	0.821535	45.06	17.96	3.36	1593.8	1640.6
892	08_Ur16_Kw17	62	N	2	4	17	2	1	2	252	18	F	English	Y	mice	1	NA	Y	59	32		46	40	86	0.559524	0.484848	0.538462	RKw17	RUr16	RUr16_2301.wav	0.448	721.6	839	117.4	807.3	26.04	724	808	0.13	0.290179	884.615	-97.4843	2.11e-05	0.821535	45.06	17.96	3.36	1593.8	1640.6
893	08_Ur16_Kw17	80	N	2	4	19	2	1	2	369	18	F	English	N			NA	Y	57	34		36	3	39	0.607143	0.545455	0.358974	RKw17	RUr16	RUr16_2301.wav	0.448	721.6	839	117.4	807.3	26.04	724	808	0.13	0.290179	884.615	-97.4843	2.11e-05	0.821535	45.06	17.96	3.36	1593.8	1640.6
894	08_Ur16_Kw17	47	N	2	3	16	2	1	2	306	18	F	English	N			NA	Y	60	42		42	45	87	0.47619	0.30303	0.333333	RKw17	RUr16	RUr16_2301.wav	0.448	721.6	839	117.4	807.3	26.04	724	808	0.13	0.290179	884.615	-97.4843	2.11e-05	0.821535	45.06	17.96	3.36	1593.8	1640.6
895	08_Ur16_Kw17	59	N	2	1	26	2	1	2	97	18	M	Gujarati	N			NA	N	37	38		NA	NA	NA	0.52381	0.393939	0.666667	RKw17	RUr16	RUr16_2301.wav	0.448	721.6	839	117.4	807.3	26.04	724	808	0.13	0.290179	884.615	-97.4843	2.11e-05	0.821535	45.06	17.96	3.36	1593.8	1640.6
896	08_Ur16_Kw17	11	N	2	4	35	2	1	2	332	20	F	English (mainly) + Hindi	Y	dogs	6	NA	Y	66	45	noted w/ regard to coos that it is upsetting - sounds like they're in pain. Noted surpirse that screams would be more intense context than coos	34	41	75	0.666667	0.545455	0.641026	RKw17	RUr16	RUr16_2301.wav	0.448	721.6	839	117.4	807.3	26.04	724	808	0.13	0.290179	884.615	-97.4843	2.11e-05	0.821535	45.06	17.96	3.36	1593.8	1640.6
897	08_Ur16_Kw17	57	N	2	4	11	2	0	1	1118	20	F	English	N			NA	N	29	31		27	41	68	0.547619	0.333333	0.538462	RKw17	RUr16	RUr16_2301.wav	0.448	721.6	839	117.4	807.3	26.04	724	808	0.13	0.290179	884.615	-97.4843	2.11e-05	0.821535	45.06	17.96	3.36	1593.8	1640.6
898	08_Ur16_Kw17	99	N	2	1	21	2	1	2	198	19	F	English + Hindi	N			NA	Y	56	37		37	39	76	0.595238	0.30303	0.461538	RKw17	RUr16	RUr16_2301.wav	0.448	721.6	839	117.4	807.3	26.04	724	808	0.13	0.290179	884.615	-97.4843	2.11e-05	0.821535	45.06	17.96	3.36	1593.8	1640.6
899	08_Ur16_Kw17	21	N	2	1	7	2	1	2	407	20	F	English	Y	dogs	6	NA	Y	44	37		41	34	75	0.630952	0.787879	0.384615	RKw17	RUr16	RUr16_2301.wav	0.448	721.6	839	117.4	807.3	26.04	724	808	0.13	0.290179	884.615	-97.4843	2.11e-05	0.821535	45.06	17.96	3.36	1593.8	1640.6
900	08_Ur16_Kw17	75	N	2	2	4	2	1	2	708	19	M	Chinese	Y	fruitfly, termites	1.5	NA	N	58	38		NA	NA	NA	0.547619	0.484848	0.461538	RKw17	RUr16	RUr16_2301.wav	0.448	721.6	839	117.4	807.3	26.04	724	808	0.13	0.290179	884.615	-97.4843	2.11e-05	0.821535	45.06	17.96	3.36	1593.8	1640.6
901	08_Ur16_Kw17	102	N	2	1	35	2	1	2	436	18	F	English	Y	elephants, dogs, tortoises	3	NA	Y	46	44		33	36	69	0.559524	0.424242	0.461538	RKw17	RUr16	RUr16_2301.wav	0.448	721.6	839	117.4	807.3	26.04	724	808	0.13	0.290179	884.615	-97.4843	2.11e-05	0.821535	45.06	17.96	3.36	1593.8	1640.6
902	08_Ur16_Kw17	115	N	2	4	35	2	0	1	3058	18	M	Mandarin	N			NA	N	31	37		NA	NA	NA	0.583333	0.575758	0.461538	RKw17	RUr16	RUr16_2301.wav	0.448	721.6	839	117.4	807.3	26.04	724	808	0.13	0.290179	884.615	-97.4843	2.11e-05	0.821535	45.06	17.96	3.36	1593.8	1640.6
903	08_Ur16_Kw17	5	N	2	3	17	2	0	1	1207	29	F	English	Y	cat, dog, horse, cow	6+ years	NA	Y	41	35		46	49	95	0.583333	0.393939	0.564103	RKw17	RUr16	RUr16_2301.wav	0.448	721.6	839	117.4	807.3	26.04	724	808	0.13	0.290179	884.615	-97.4843	2.11e-05	0.821535	45.06	17.96	3.36	1593.8	1640.6
904	08_Ur16_Kw17	42	N	2	2	28	2	0	1	1628	19	F	English	N			NA	N	35	28		44	44	88	0.571429	0.454545	0.692308	RKw17	RUr16	RUr16_2301.wav	0.448	721.6	839	117.4	807.3	26.04	724	808	0.13	0.290179	884.615	-97.4843	2.11e-05	0.821535	45.06	17.96	3.36	1593.8	1640.6
905	08_Ur16_Kw17	4	N	2	3	7	2	1	2	537	20	M	English	N			NA	N	43	38		27	24	51	0.559524	0.424242	0.589744	RKw17	RUr16	RUr16_2301.wav	0.448	721.6	839	117.4	807.3	26.04	724	808	0.13	0.290179	884.615	-97.4843	2.11e-05	0.821535	45.06	17.96	3.36	1593.8	1640.6
906	08_Ur16_Kw17	66	N	2	2	6	2	1	2	3155	20	M	Chinese	N			NA	N	41	38		NA	NA	NA	0.47619	0.69697	0.512821	RKw17	RUr16	RUr16_2301.wav	0.448	721.6	839	117.4	807.3	26.04	724	808	0.13	0.290179	884.615	-97.4843	2.11e-05	0.821535	45.06	17.96	3.36	1593.8	1640.6
907	08_Ur16_Kw17	26	N	2	1	10	2	1	2	306	24	M	Telugu	N			NA	N	41	35		NA	NA	NA	0.607143	0.515152	0.538462	RKw17	RUr16	RUr16_2301.wav	0.448	721.6	839	117.4	807.3	26.04	724	808	0.13	0.290179	884.615	-97.4843	2.11e-05	0.821535	45.06	17.96	3.36	1593.8	1640.6
908	08_Ur16_Kw17	6	N	2	1	32	2	1	2	439	23	M	English	Y	mice	3	NA	Y	31	28		38	41	79	0.595238	0.484848	0.589744	RKw17	RUr16	RUr16_2301.wav	0.448	721.6	839	117.4	807.3	26.04	724	808	0.13	0.290179	884.615	-97.4843	2.11e-05	0.821535	45.06	17.96	3.36	1593.8	1640.6
909	08_Ur16_Kw17	86	N	2	1	20	2	1	2	270	22	M	Chinese	N			NA	Y	44	35		NA	NA	NA	0.666667	0.515152	0.641026	RKw17	RUr16	RUr16_2301.wav	0.448	721.6	839	117.4	807.3	26.04	724	808	0.13	0.290179	884.615	-97.4843	2.11e-05	0.821535	45.06	17.96	3.36	1593.8	1640.6
910	08_Ur16_Kw17	54	N	2	1	28	2	1	2	73	18	F	Chinese	N			NA	N	35	41		NA	NA	NA	0.535714	0.424242	0.538462	RKw17	RUr16	RUr16_2301.wav	0.448	721.6	839	117.4	807.3	26.04	724	808	0.13	0.290179	884.615	-97.4843	2.11e-05	0.821535	45.06	17.96	3.36	1593.8	1640.6
911	08_Ur16_Kw17	68	N	2	2	16	2	1	2	297	19	M	Spanish	N			NA	N	48	NA	didn't fill out this questionnaire animal	NA	NA	NA	0.607143	0.333333	0.641026	RKw17	RUr16	RUr16_2301.wav	0.448	721.6	839	117.4	807.3	26.04	724	808	0.13	0.290179	884.615	-97.4843	2.11e-05	0.821535	45.06	17.96	3.36	1593.8	1640.6
912	08_Ur16_Kw17	505	Y	2	2	22	2	1	2	547	30	F	English	Y	Rhesus macaque, horses, dogs, cats, birds, mangabey	120	94	Y	NA	NA		NA	NA	NA	0.595238	1	0.589744	RKw17	RUr16	RUr16_2301.wav	0.448	721.6	839	117.4	807.3	26.04	724	808	0.13	0.290179	884.615	-97.4843	2.11e-05	0.821535	45.06	17.96	3.36	1593.8	1640.6
913	08_Ur16_Kw17	111	N	2	3	6	2	0	1	266	21	F	English	N			NA	N	39	39		40	36	76	0.511905	0.575758	0.512821	RKw17	RUr16	RUr16_2301.wav	0.448	721.6	839	117.4	807.3	26.04	724	808	0.13	0.290179	884.615	-97.4843	2.11e-05	0.821535	45.06	17.96	3.36	1593.8	1640.6
914	08_Ur16_Kw17	39	N	2	3	34	2	0	1	1296	19	F	Spanish/English	N			NA	Y	55	38		41	43	84	0.583333	0.454545	0.538462	RKw17	RUr16	RUr16_2301.wav	0.448	721.6	839	117.4	807.3	26.04	724	808	0.13	0.290179	884.615	-97.4843	2.11e-05	0.821535	45.06	17.96	3.36	1593.8	1640.6
915	08_Ur16_Kw17	10	N	2	3	4	2	0	1	3896	21	F	English	N			NA	Y	50	38		36	38	74	0.559524	0.757576	0.358974	RKw17	RUr16	RUr16_2301.wav	0.448	721.6	839	117.4	807.3	26.04	724	808	0.13	0.290179	884.615	-97.4843	2.11e-05	0.821535	45.06	17.96	3.36	1593.8	1640.6
916	08_Ur16_Kw17	17	N	2	2	12	2	1	2	972	19	F	Chinese	N			NA	Y	49	34		NA	NA	NA	0.595238	1	0.487179	RKw17	RUr16	RUr16_2301.wav	0.448	721.6	839	117.4	807.3	26.04	724	808	0.13	0.290179	884.615	-97.4843	2.11e-05	0.821535	45.06	17.96	3.36	1593.8	1640.6
917	08_Ur16_Kw17	44	N	2	1	22	2	1	2	2172	31	F	English	N			NA	Y	39	34		47	45	92	0.571429	0.606061	0.333333	RKw17	RUr16	RUr16_2301.wav	0.448	721.6	839	117.4	807.3	26.04	724	808	0.13	0.290179	884.615	-97.4843	2.11e-05	0.821535	45.06	17.96	3.36	1593.8	1640.6
918	08_Ur16_Kw17	36	N	2	3	41	2	1	2	253	19	F	English	Y	dogs, cats	4	NA	Y	53	31		42	42	84	0.416667	0.606061	0.435897	RKw17	RUr16	RUr16_2301.wav	0.448	721.6	839	117.4	807.3	26.04	724	808	0.13	0.290179	884.615	-97.4843	2.11e-05	0.821535	45.06	17.96	3.36	1593.8	1640.6
919	08_Ur16_Kw17	40	N	2	2	11	2	1	2	439	19	F	Chinese	N			NA	N	39	39		NA	NA	NA	0.666667	0.515152	0.512821	RKw17	RUr16	RUr16_2301.wav	0.448	721.6	839	117.4	807.3	26.04	724	808	0.13	0.290179	884.615	-97.4843	2.11e-05	0.821535	45.06	17.96	3.36	1593.8	1640.6
920	08_Ur16_Kw17	77	N	2	3	26	2	0	1	174	19	M	Chinese	N			NA	Y	46	18		NA	NA	NA	0.595238	0.454545	0.538462	RKw17	RUr16	RUr16_2301.wav	0.448	721.6	839	117.4	807.3	26.04	724	808	0.13	0.290179	884.615	-97.4843	2.11e-05	0.821535	45.06	17.96	3.36	1593.8	1640.6
921	08_Ur16_Kw17	71	N	2	2	39	2	1	2	373	19	M	English	N			NA	Y	44	36		43	43	86	0.595238	0.424242	0.333333	RKw17	RUr16	RUr16_2301.wav	0.448	721.6	839	117.4	807.3	26.04	724	808	0.13	0.290179	884.615	-97.4843	2.11e-05	0.821535	45.06	17.96	3.36	1593.8	1640.6
922	08_Ur16_Kw17	9	N	2	1	24	2	0	1	406	19	M	English	Y	dogs, cats	3	NA	Y	41	31		35	32	67	0.416667	0.121212	0.435897	RKw17	RUr16	RUr16_2301.wav	0.448	721.6	839	117.4	807.3	26.04	724	808	0.13	0.290179	884.615	-97.4843	2.11e-05	0.821535	45.06	17.96	3.36	1593.8	1640.6
923	08_Ur16_Kw17	64	N	2	4	20	2	1	2	2509	18	F	English	N			NA	N	55	36		40	42	82	0.654762	0.393939	0.666667	RKw17	RUr16	RUr16_2301.wav	0.448	721.6	839	117.4	807.3	26.04	724	808	0.13	0.290179	884.615	-97.4843	2.11e-05	0.821535	45.06	17.96	3.36	1593.8	1640.6
924	08_Ur16_Kw17	509	Y	2	1	11	2	0	1	814	28	M	Spanish/English	Y	Rhesus macaque, mangabey	48	48	Y	NA	NA		NA	NA	NA	0.464286	0.969697	0.615385	RKw17	RUr16	RUr16_2301.wav	0.448	721.6	839	117.4	807.3	26.04	724	808	0.13	0.290179	884.615	-97.4843	2.11e-05	0.821535	45.06	17.96	3.36	1593.8	1640.6
925	08_Ur16_Kw17	8	N	2	1	7	2	1	2	709	19	F	English	Y	dogs, cats	24	NA	Y	58	40		39	43	82	0.595238	0.363636	0.589744	RKw17	RUr16	RUr16_2301.wav	0.448	721.6	839	117.4	807.3	26.04	724	808	0.13	0.290179	884.615	-97.4843	2.11e-05	0.821535	45.06	17.96	3.36	1593.8	1640.6
926	08_Ur16_Kw17	105	N	2	2	39	2	0	1	428	19	F	English	N			NA	Y	44	36		40	42	82	0.571429	0.606061	0.435897	RKw17	RUr16	RUr16_2301.wav	0.448	721.6	839	117.4	807.3	26.04	724	808	0.13	0.290179	884.615	-97.4843	2.11e-05	0.821535	45.06	17.96	3.36	1593.8	1640.6
927	08_Ur16_Kw17	91	N	2	1	28	2	1	2	607	20	F	Chinese	N			NA	N	49	36		NA	NA	NA	0.547619	0.606061	0.641026	RKw17	RUr16	RUr16_2301.wav	0.448	721.6	839	117.4	807.3	26.04	724	808	0.13	0.290179	884.615	-97.4843	2.11e-05	0.821535	45.06	17.96	3.36	1593.8	1640.6
928	08_Ur16_Kw17	25	N	2	3	22	2	0	1	867	21	M	English	N			NA	N	56	32		34	41	75	0.5	0.575758	0.461538	RKw17	RUr16	RUr16_2301.wav	0.448	721.6	839	117.4	807.3	26.04	724	808	0.13	0.290179	884.615	-97.4843	2.11e-05	0.821535	45.06	17.96	3.36	1593.8	1640.6
929	08_Ur16_Kw17	60	N	2	2	38	2	1	2	213	18	F	Chinese	N			NA	Y	54	33		NA	NA	NA	0.595238	0.69697	0.615385	RKw17	RUr16	RUr16_2301.wav	0.448	721.6	839	117.4	807.3	26.04	724	808	0.13	0.290179	884.615	-97.4843	2.11e-05	0.821535	45.06	17.96	3.36	1593.8	1640.6
930	08_Ur16_Kw17	38	N	2	4	1	2	1	2	276	18	F	English	N			NA	Y	57	36		41	41	82	0.619048	0.606061	0.615385	RKw17	RUr16	RUr16_2301.wav	0.448	721.6	839	117.4	807.3	26.04	724	808	0.13	0.290179	884.615	-97.4843	2.11e-05	0.821535	45.06	17.96	3.36	1593.8	1640.6
931	08_Ur16_Kw17	7	N	2	1	14	2	1	2	485	21	F	English	N			NA	Y	49	33		44	43	87	0.583333	0.363636	0.615385	RKw17	RUr16	RUr16_2301.wav	0.448	721.6	839	117.4	807.3	26.04	724	808	0.13	0.290179	884.615	-97.4843	2.11e-05	0.821535	45.06	17.96	3.36	1593.8	1640.6
932	08_Ur16_Kw17	110	N	2	1	25	2	0	1	727	19	M	English	N			NA	Y	40	32		35	38	73	0.511905	0.69697	0.564103	RKw17	RUr16	RUr16_2301.wav	0.448	721.6	839	117.4	807.3	26.04	724	808	0.13	0.290179	884.615	-97.4843	2.11e-05	0.821535	45.06	17.96	3.36	1593.8	1640.6
933	08_Ur16_Kw17	96	N	2	1	29	2	1	2	122	18	F	English	N			NA	Y	59	39		44	47	91	0.583333	0.727273	0.512821	RKw17	RUr16	RUr16_2301.wav	0.448	721.6	839	117.4	807.3	26.04	724	808	0.13	0.290179	884.615	-97.4843	2.11e-05	0.821535	45.06	17.96	3.36	1593.8	1640.6
934	08_Ur16_Kw17	83	N	2	3	18	2	0	1	521	19	F	English	N			NA	Y	55	46		48	46	94	0.5	0.333333	0.487179	RKw17	RUr16	RUr16_2301.wav	0.448	721.6	839	117.4	807.3	26.04	724	808	0.13	0.290179	884.615	-97.4843	2.11e-05	0.821535	45.06	17.96	3.36	1593.8	1640.6
935	08_Ur16_Kw17	37	N	2	2	40	2	1	2	209	19	F	Spanish	N			NA	Y	44	32		NA	NA	NA	0.52381	0.606061	0.641026	RKw17	RUr16	RUr16_2301.wav	0.448	721.6	839	117.4	807.3	26.04	724	808	0.13	0.290179	884.615	-97.4843	2.11e-05	0.821535	45.06	17.96	3.36	1593.8	1640.6
936	08_Ur16_Kw17	507	Y	2	1	4	2	1	2	1848	27	F	English	Y	Rhesus macaque, tufted capuchins	60	48	Y	NA	NA		NA	NA	NA	0.547619	1	0.666667	RKw17	RUr16	RUr16_2301.wav	0.448	721.6	839	117.4	807.3	26.04	724	808	0.13	0.290179	884.615	-97.4843	2.11e-05	0.821535	45.06	17.96	3.36	1593.8	1640.6
937	08_Ur16_Kw17	107	N	2	4	29	2	1	2	982	22	F	Chinese	N			NA	N	21	37		NA	NA	NA	0.595238	0.424242	0.435897	RKw17	RUr16	RUr16_2301.wav	0.448	721.6	839	117.4	807.3	26.04	724	808	0.13	0.290179	884.615	-97.4843	2.11e-05	0.821535	45.06	17.96	3.36	1593.8	1640.6
938	08_Ur16_Kw17	55	N	2	4	25	2	1	2	276	18	F	Mandarin	N			NA	Y	64	30		NA	NA	NA	0.690476	0.515152	0.410256	RKw17	RUr16	RUr16_2301.wav	0.448	721.6	839	117.4	807.3	26.04	724	808	0.13	0.290179	884.615	-97.4843	2.11e-05	0.821535	45.06	17.96	3.36	1593.8	1640.6
939	08_Ur16_Kw17	67	N	2	3	27	2	1	2	155	18	F	English	N			NA	N	29	44		32	32	64	0.75	0.636364	0.564103	RKw17	RUr16	RUr16_2301.wav	0.448	721.6	839	117.4	807.3	26.04	724	808	0.13	0.290179	884.615	-97.4843	2.11e-05	0.821535	45.06	17.96	3.36	1593.8	1640.6
940	08_Ur16_Kw17	18	N	2	2	16	2	1	2	605	20	F	English	N			NA	Y	44	35		32	42	74	0.571429	0.151515	0.333333	RKw17	RUr16	RUr16_2301.wav	0.448	721.6	839	117.4	807.3	26.04	724	808	0.13	0.290179	884.615	-97.4843	2.11e-05	0.821535	45.06	17.96	3.36	1593.8	1640.6
941	08_Ur16_Kw17	84	N	2	3	4	2	1	2	393	19	F	English	N			NA	Y	34	36		35	37	72	0.547619	0.575758	0.512821	RKw17	RUr16	RUr16_2301.wav	0.448	721.6	839	117.4	807.3	26.04	724	808	0.13	0.290179	884.615	-97.4843	2.11e-05	0.821535	45.06	17.96	3.36	1593.8	1640.6
942	08_Ur16_Kw17	78	N	2	2	39	2	1	2	566	20	M	Spanish	Y	dogs, snakes	2	NA	Y	45	35		NA	NA	NA	0.547619	0.424242	0.487179	RKw17	RUr16	RUr16_2301.wav	0.448	721.6	839	117.4	807.3	26.04	724	808	0.13	0.290179	884.615	-97.4843	2.11e-05	0.821535	45.06	17.96	3.36	1593.8	1640.6
943	08_Ur16_Kw17	30	N	2	1	11	2	1	2	279	19	F	Chinese	N			NA	N	43	31		NA	NA	NA	0.535714	0.151515	0.641026	RKw17	RUr16	RUr16_2301.wav	0.448	721.6	839	117.4	807.3	26.04	724	808	0.13	0.290179	884.615	-97.4843	2.11e-05	0.821535	45.06	17.96	3.36	1593.8	1640.6
944	08_Ur16_Kw17	27	N	2	4	18	2	0	1	250	23	F	Telugu	N			NA	N	32	44		NA	NA	NA	0.547619	0.151515	0.512821	RKw17	RUr16	RUr16_2301.wav	0.448	721.6	839	117.4	807.3	26.04	724	808	0.13	0.290179	884.615	-97.4843	2.11e-05	0.821535	45.06	17.96	3.36	1593.8	1640.6
945	08_Ur16_Kw17	61	N	2	4	40	2	1	2	62	19	M	English	N			NA	Y	42	36		43	35	78	0.619048	0.424242	0.461538	RKw17	RUr16	RUr16_2301.wav	0.448	721.6	839	117.4	807.3	26.04	724	808	0.13	0.290179	884.615	-97.4843	2.11e-05	0.821535	45.06	17.96	3.36	1593.8	1640.6
946	08_Ur16_Kw17	90	N	2	3	34	2	1	2	640	21	M	English	N			NA	N	43	24		42	42	84	0.52381	0.69697	0.641026	RKw17	RUr16	RUr16_2301.wav	0.448	721.6	839	117.4	807.3	26.04	724	808	0.13	0.290179	884.615	-97.4843	2.11e-05	0.821535	45.06	17.96	3.36	1593.8	1640.6
947	08_Ur16_Kw17	35	N	2	1	10	2	1	2	569	19	M	English	N			NA	N	40	21		44	39	83	0.666667	0.818182	0.641026	RKw17	RUr16	RUr16_2301.wav	0.448	721.6	839	117.4	807.3	26.04	724	808	0.13	0.290179	884.615	-97.4843	2.11e-05	0.821535	45.06	17.96	3.36	1593.8	1640.6
948	08_Ur16_Kw17	93	N	2	1	13	2	1	2	520	19	F	English	N			NA	Y	53	37		38	38	76	0.52381	0.30303	0.487179	RKw17	RUr16	RUr16_2301.wav	0.448	721.6	839	117.4	807.3	26.04	724	808	0.13	0.290179	884.615	-97.4843	2.11e-05	0.821535	45.06	17.96	3.36	1593.8	1640.6
949	08_Ur16_Kw17	19	N	2	3	29	2	1	2	275	51	F	English	Y	mice	240	NA	Y	36	29		43	47	90	0.511905	0.575758	0.487179	RKw17	RUr16	RUr16_2301.wav	0.448	721.6	839	117.4	807.3	26.04	724	808	0.13	0.290179	884.615	-97.4843	2.11e-05	0.821535	45.06	17.96	3.36	1593.8	1640.6
950	08_Ur16_Kw17	513	Y	2	1	34	2	1	2	291	53	F	English	Y	chimps, bonobos, Rhesus macaque, Sooty mangabeys, pigtail macaque, gibbons, orangutan, stumptail macaques, baboons	288	288	Y	NA	NA		NA	NA	NA	0.535714	0.969697	0.589744	RKw17	RUr16	RUr16_2301.wav	0.448	721.6	839	117.4	807.3	26.04	724	808	0.13	0.290179	884.615	-97.4843	2.11e-05	0.821535	45.06	17.96	3.36	1593.8	1640.6
951	08_Ur16_Kw17	511	Y	2	1	17	2	1	2	1337	24	F	English	Y	Rhesus macaque, domestic cats	24	24	Y	NA	NA		NA	NA	NA	0.571429	0.69697	0.512821	RKw17	RUr16	RUr16_2301.wav	0.448	721.6	839	117.4	807.3	26.04	724	808	0.13	0.290179	884.615	-97.4843	2.11e-05	0.821535	45.06	17.96	3.36	1593.8	1640.6
952	08_Ur16_Kw17	48	N	2	1	7	2	1	2	2736	19	F	English	N			NA	Y	33	36		36	46	82	0.654762	0.606061	0.564103	RKw17	RUr16	RUr16_2301.wav	0.448	721.6	839	117.4	807.3	26.04	724	808	0.13	0.290179	884.615	-97.4843	2.11e-05	0.821535	45.06	17.96	3.36	1593.8	1640.6
953	08_Ur16_Kw17	63	N	2	4	25	2	1	2	1185	19	F	English	N			NA	N	60	40		44	42	86	0.535714	0	0.717949	RKw17	RUr16	RUr16_2301.wav	0.448	721.6	839	117.4	807.3	26.04	724	808	0.13	0.290179	884.615	-97.4843	2.11e-05	0.821535	45.06	17.96	3.36	1593.8	1640.6
954	08_Ur16_Kw17	49	N	2	4	6	2	1	2	370	18	F	English	N			NA	N	44	28		42	2	44	0.642857	0.454545	0.487179	RKw17	RUr16	RUr16_2301.wav	0.448	721.6	839	117.4	807.3	26.04	724	808	0.13	0.290179	884.615	-97.4843	2.11e-05	0.821535	45.06	17.96	3.36	1593.8	1640.6
955	08_Ur16_Kw17	56	N	2	2	16	2	1	2	987	18	F	Chinese	N			NA	Y	31	30		NA	NA	NA	0.595238	0.575758	0.384615	RKw17	RUr16	RUr16_2301.wav	0.448	721.6	839	117.4	807.3	26.04	724	808	0.13	0.290179	884.615	-97.4843	2.11e-05	0.821535	45.06	17.96	3.36	1593.8	1640.6
956	08_Ur16_Kw17	114	N	2	1	35	2	1	2	632	19	M	English	N			NA	Y	58	35		36	38	74	0.607143	0.393939	0.512821	RKw17	RUr16	RUr16_2301.wav	0.448	721.6	839	117.4	807.3	26.04	724	808	0.13	0.290179	884.615	-97.4843	2.11e-05	0.821535	45.06	17.96	3.36	1593.8	1640.6
957	08_Ur16_Kw17	14	N	2	1	32	2	1	2	2545	19	M	English and Mandarin	N			NA	N	43	35		32	39	71	0.642857	0.818182	0.615385	RKw17	RUr16	RUr16_2301.wav	0.448	721.6	839	117.4	807.3	26.04	724	808	0.13	0.290179	884.615	-97.4843	2.11e-05	0.821535	45.06	17.96	3.36	1593.8	1640.6
958	08_Ur16_Kw17	104	N	2	1	5	2	1	2	1113	19	F	Bangla	N			NA	N	49	31		NA	NA	NA	0.619048	0.363636	0.384615	RKw17	RUr16	RUr16_2301.wav	0.448	721.6	839	117.4	807.3	26.04	724	808	0.13	0.290179	884.615	-97.4843	2.11e-05	0.821535	45.06	17.96	3.36	1593.8	1640.6
959	08_Ur16_Kw17	69	N	2	2	35	2	1	2	472	20	F	English	N			NA	Y	40	37		42	43	85	0.547619	0.424242	0.615385	RKw17	RUr16	RUr16_2301.wav	0.448	721.6	839	117.4	807.3	26.04	724	808	0.13	0.290179	884.615	-97.4843	2.11e-05	0.821535	45.06	17.96	3.36	1593.8	1640.6
960	08_Ur16_Kw17	76	N	2	4	24	2	1	2	260	19	F	Chinese	N			NA	Y	41	41		NA	NA	NA	0.630952	0.393939	0.538462	RKw17	RUr16	RUr16_2301.wav	0.448	721.6	839	117.4	807.3	26.04	724	808	0.13	0.290179	884.615	-97.4843	2.11e-05	0.821535	45.06	17.96	3.36	1593.8	1640.6
961	08_Ur16_Kw17	73	N	2	1	36	2	1	2	74	19	F	English and Chinese	N			NA	Y	41	37		34	36	70	0.571429	0.575758	0.538462	RKw17	RUr16	RUr16_2301.wav	0.448	721.6	839	117.4	807.3	26.04	724	808	0.13	0.290179	884.615	-97.4843	2.11e-05	0.821535	45.06	17.96	3.36	1593.8	1640.6
962	08_Ur16_Kw17	29	N	2	1	2	2	1	2	954	19	F	English	Y	dogs, cats	3	NA	Y	63	44		47	41	88	0.547619	0.454545	0.512821	RKw17	RUr16	RUr16_2301.wav	0.448	721.6	839	117.4	807.3	26.04	724	808	0.13	0.290179	884.615	-97.4843	2.11e-05	0.821535	45.06	17.96	3.36	1593.8	1640.6
963	08_Ur16_Kw17	82	N	2	2	22	2	1	2	476	18	F	Korean	Y	dogs, cats	3	NA	Y	31	40		NA	NA	NA	0.559524	0.333333	0.641026	RKw17	RUr16	RUr16_2301.wav	0.448	721.6	839	117.4	807.3	26.04	724	808	0.13	0.290179	884.615	-97.4843	2.11e-05	0.821535	45.06	17.96	3.36	1593.8	1640.6
964	08_Ur16_Kw17	101	N	2	4	28	2	0	1	648	19	F	English	Y	mice	11	NA	Y	50	40		43	43	86	0.690476	0.484848	0.487179	RKw17	RUr16	RUr16_2301.wav	0.448	721.6	839	117.4	807.3	26.04	724	808	0.13	0.290179	884.615	-97.4843	2.11e-05	0.821535	45.06	17.96	3.36	1593.8	1640.6
965	08_Ur16_Kw17	502	Y	2	1	41	2	1	2	527	39	F	English	Y	Rhesus, pigrails, gorillas, orangutans, lemurs	216	204	Y	63	30		45	43	88	0.642857	0.909091	0.666667	RKw17	RUr16	RUr16_2301.wav	0.448	721.6	839	117.4	807.3	26.04	724	808	0.13	0.290179	884.615	-97.4843	2.11e-05	0.821535	45.06	17.96	3.36	1593.8	1640.6
966	08_Ur16_Kw17	50	N	2	4	39	2	1	2	333	19	F	English	Y	dogs, cats	12	NA	Y	53	40		24	19	43	0.5	0.212121	0.512821	RKw17	RUr16	RUr16_2301.wav	0.448	721.6	839	117.4	807.3	26.04	724	808	0.13	0.290179	884.615	-97.4843	2.11e-05	0.821535	45.06	17.96	3.36	1593.8	1640.6
967	08_Ur16_Kw17	43	N	2	3	33	2	0	1	704	19	M	English	N			NA	Y	37	39		36	40	76	0.595238	0.666667	0.589744	RKw17	RUr16	RUr16_2301.wav	0.448	721.6	839	117.4	807.3	26.04	724	808	0.13	0.290179	884.615	-97.4843	2.11e-05	0.821535	45.06	17.96	3.36	1593.8	1640.6
968	08_Ur16_Kw17	24	N	2	2	12	2	1	2	266	20	M	English	N			NA	N	41	24		35	36	71	0.404762	0.363636	0.666667	RKw17	RUr16	RUr16_2301.wav	0.448	721.6	839	117.4	807.3	26.04	724	808	0.13	0.290179	884.615	-97.4843	2.11e-05	0.821535	45.06	17.96	3.36	1593.8	1640.6
969	08_Ur16_Kw17	106	N	2	4	9	2	1	2	648	18	F	Korean	N			NA	Y	53	39		NA	NA	NA	0.607143	0.606061	0.461538	RKw17	RUr16	RUr16_2301.wav	0.448	721.6	839	117.4	807.3	26.04	724	808	0.13	0.290179	884.615	-97.4843	2.11e-05	0.821535	45.06	17.96	3.36	1593.8	1640.6
970	08_Ur16_Kw17	31	N	2	4	17	2	0	1	729	18	F	English	N			NA	Y	47	35		38	40	78	0.583333	0.575758	0.384615	RKw17	RUr16	RUr16_2301.wav	0.448	721.6	839	117.4	807.3	26.04	724	808	0.13	0.290179	884.615	-97.4843	2.11e-05	0.821535	45.06	17.96	3.36	1593.8	1640.6
971	08_Ur16_Kw17	501	Y	2	4	20	2	1	2	267	26	M	English	Y	lemurs (black white ruffed, ringtail, red bellied, crown, mongoose), Rhesus monkeys, gorillas, orangutans	Lemur: 24, Rh: 48, Gorilla: 12, Orangutan: 12	48	Y	47	37		46	44	90	0.559524	0.69697	0.461538	RKw17	RUr16	RUr16_2301.wav	0.448	721.6	839	117.4	807.3	26.04	724	808	0.13	0.290179	884.615	-97.4843	2.11e-05	0.821535	45.06	17.96	3.36	1593.8	1640.6
972	08_Ur16_Kw17	33	N	2	2	26	2	0	1	274	19	F	Mandarin + English	N			NA	Y	56	33		NA	NA	NA	0.571429	0.272727	0.615385	RKw17	RUr16	RUr16_2301.wav	0.448	721.6	839	117.4	807.3	26.04	724	808	0.13	0.290179	884.615	-97.4843	2.11e-05	0.821535	45.06	17.96	3.36	1593.8	1640.6
973	08_Ur16_Kw17	2	N	2	3	29	2	1	2	411	19	F	English	N			NA	Y	49	42		36	37	73	0.595238	0.0606061	0.641026	RKw17	RUr16	RUr16_2301.wav	0.448	721.6	839	117.4	807.3	26.04	724	808	0.13	0.290179	884.615	-97.4843	2.11e-05	0.821535	45.06	17.96	3.36	1593.8	1640.6
974	08_Ur16_Kw17	53	N	2	1	15	2	1	2	248	18	F	English	N			NA	N	71	47		22	17	39	0.642857	0.787879	0.641026	RKw17	RUr16	RUr16_2301.wav	0.448	721.6	839	117.4	807.3	26.04	724	808	0.13	0.290179	884.615	-97.4843	2.11e-05	0.821535	45.06	17.96	3.36	1593.8	1640.6
975	08_Ur16_Kw17	81	N	2	4	3	2	1	2	462	18	F	English	N			NA	Y	53	33		43	51	94	0.690476	0.454545	0.538462	RKw17	RUr16	RUr16_2301.wav	0.448	721.6	839	117.4	807.3	26.04	724	808	0.13	0.290179	884.615	-97.4843	2.11e-05	0.821535	45.06	17.96	3.36	1593.8	1640.6
976	08_Ur16_Kw17	13	N	2	4	39	2	0	1	1522	19	F	English	N			NA	N	21	34		42	41	83	0.5	0.666667	0.487179	RKw17	RUr16	RUr16_2301.wav	0.448	721.6	839	117.4	807.3	26.04	724	808	0.13	0.290179	884.615	-97.4843	2.11e-05	0.821535	45.06	17.96	3.36	1593.8	1640.6
977	08_Ur16_Kw17	510	Y	2	1	21	2	0	1	47203	30	M	English	Y	Rhesus macaque, Sooty mangabey	60	60	Y	NA	NA	asked for more clarification on "intense emotion" ~3 min into task	NA	NA	NA	0.511905	0.727273	0.717949	RKw17	RUr16	RUr16_2301.wav	0.448	721.6	839	117.4	807.3	26.04	724	808	0.13	0.290179	884.615	-97.4843	2.11e-05	0.821535	45.06	17.96	3.36	1593.8	1640.6
978	08_Ur16_Kw17	72	N	2	3	31	2	0	1	261	19	F	English	N			NA	Y	48	33		35	31	66	0.511905	0.69697	0.538462	RKw17	RUr16	RUr16_2301.wav	0.448	721.6	839	117.4	807.3	26.04	724	808	0.13	0.290179	884.615	-97.4843	2.11e-05	0.821535	45.06	17.96	3.36	1593.8	1640.6
979	08_Ur16_Kw17	52	N	2	2	33	2	1	2	1121	19	F	English	N			NA	Y	55	38		42	43	85	0.619048	0.393939	0.512821	RKw17	RUr16	RUr16_2301.wav	0.448	721.6	839	117.4	807.3	26.04	724	808	0.13	0.290179	884.615	-97.4843	2.11e-05	0.821535	45.06	17.96	3.36	1593.8	1640.6
980	08_Ur16_Kw17	32	N	2	1	41	2	1	2	1033	23	F	English	N			NA	N	58	26		34	33	67	0.559524	0.424242	0.435897	RKw17	RUr16	RUr16_2301.wav	0.448	721.6	839	117.4	807.3	26.04	724	808	0.13	0.290179	884.615	-97.4843	2.11e-05	0.821535	45.06	17.96	3.36	1593.8	1640.6
981	08_Ur16_Kw17	65	N	2	2	32	2	1	2	265	20	F	Arabic	Y			NA	N	36	35		NA	NA	NA	0.559524	0.363636	0.564103	RKw17	RUr16	RUr16_2301.wav	0.448	721.6	839	117.4	807.3	26.04	724	808	0.13	0.290179	884.615	-97.4843	2.11e-05	0.821535	45.06	17.96	3.36	1593.8	1640.6
982	08_Ur16_Kw17	97	N	2	4	38	2	1	2	234	19	F	English	N			NA	Y	48	28		40	43	83	0.595238	0.606061	0.487179	RKw17	RUr16	RUr16_2301.wav	0.448	721.6	839	117.4	807.3	26.04	724	808	0.13	0.290179	884.615	-97.4843	2.11e-05	0.821535	45.06	17.96	3.36	1593.8	1640.6
983	08_Ur16_Kw17	103	N	2	4	19	2	1	2	344	19	F	Korean + English	Y	dogs, cats	3	NA	Y	47	39		40	41	81	0.52381	0.393939	0.512821	RKw17	RUr16	RUr16_2301.wav	0.448	721.6	839	117.4	807.3	26.04	724	808	0.13	0.290179	884.615	-97.4843	2.11e-05	0.821535	45.06	17.96	3.36	1593.8	1640.6
984	08_Ur16_Kw17	512	Y	2	2	31	2	1	2	365	39	M	English	Y	Rhesus macaque, pigtail macaque, common chimpanzee, west lowland gorilla, Sooty mangabey	144	144	Y	NA	NA	occasionally needed to answer radio during task	NA	NA	NA	0.642857	1	0.589744	RKw17	RUr16	RUr16_2301.wav	0.448	721.6	839	117.4	807.3	26.04	724	808	0.13	0.290179	884.615	-97.4843	2.11e-05	0.821535	45.06	17.96	3.36	1593.8	1640.6
985	08_Ur16_Kw17	508	Y	2	2	17	2	1	2	768	40	F	English	Y	Rhesus macaque, pigtail macaque, sooty mangabey	192	120	Y	NA	NA		NA	NA	NA	0.511905	0.969697	0.641026	RKw17	RUr16	RUr16_2301.wav	0.448	721.6	839	117.4	807.3	26.04	724	808	0.13	0.290179	884.615	-97.4843	2.11e-05	0.821535	45.06	17.96	3.36	1593.8	1640.6
986	08_Ur16_Kw17	20	Y	2	2	33	2	1	2	330	37	F	English	Y	Rhesus, chimpanzees, dogs, cats, mice, rats	180	132	Y	52	33		46	47	93	0.392857	0.454545	0.589744	RKw17	RUr16	RUr16_2301.wav	0.448	721.6	839	117.4	807.3	26.04	724	808	0.13	0.290179	884.615	-97.4843	2.11e-05	0.821535	45.06	17.96	3.36	1593.8	1640.6
987	08_Ur16_Kw17	95	N	2	2	11	2	1	2	279	20	F	English	N			NA	Y	57	30		39	44	83	0.571429	0.363636	0.564103	RKw17	RUr16	RUr16_2301.wav	0.448	721.6	839	117.4	807.3	26.04	724	808	0.13	0.290179	884.615	-97.4843	2.11e-05	0.821535	45.06	17.96	3.36	1593.8	1640.6
988	08_Ur16_Kw17	3	N	2	2	14	2	1	2	1293	28	M	English	N			NA	Y	39	30		45	42	87	0.559524	0.575758	0.487179	RKw17	RUr16	RUr16_2301.wav	0.448	721.6	839	117.4	807.3	26.04	724	808	0.13	0.290179	884.615	-97.4843	2.11e-05	0.821535	45.06	17.96	3.36	1593.8	1640.6
989	08_Ur16_Kw17	108	N	2	2	10	2	1	2	2097	19	M	English	N			NA	N	59	24		45	43	88	0.571429	0.393939	0.435897	RKw17	RUr16	RUr16_2301.wav	0.448	721.6	839	117.4	807.3	26.04	724	808	0.13	0.290179	884.615	-97.4843	2.11e-05	0.821535	45.06	17.96	3.36	1593.8	1640.6
990	08_Ur16_Kw17	28	N	2	2	1	2	1	2	283	40	F	English	N			NA	Y	50	33		42	NA	NA	0.630952	0.606061	0.564103	RKw17	RUr16	RUr16_2301.wav	0.448	721.6	839	117.4	807.3	26.04	724	808	0.13	0.290179	884.615	-97.4843	2.11e-05	0.821535	45.06	17.96	3.36	1593.8	1640.6
991	08_Ur16_Kw17	41	N	2	4	8	2	1	2	236	20	M	Vietnamese	N			NA	Y	45	29		NA	NA	NA	0.630952	0.454545	0.435897	RKw17	RUr16	RUr16_2301.wav	0.448	721.6	839	117.4	807.3	26.04	724	808	0.13	0.290179	884.615	-97.4843	2.11e-05	0.821535	45.06	17.96	3.36	1593.8	1640.6
992	08_Ur16_Kw17	85	N	2	1	36	2	1	2	218	19	F	Chinese	N			NA	Y	25	32		NA	NA	NA	0.571429	0.363636	0.435897	RKw17	RUr16	RUr16_2301.wav	0.448	721.6	839	117.4	807.3	26.04	724	808	0.13	0.290179	884.615	-97.4843	2.11e-05	0.821535	45.06	17.96	3.36	1593.8	1640.6
993	08_Ur16_Kw17	100	N	2	3	22	2	1	2	298	21	F	Mandarin	N			NA	Y	50	36		NA	NA	NA	0.619048	0.424242	0.641026	RKw17	RUr16	RUr16_2301.wav	0.448	721.6	839	117.4	807.3	26.04	724	808	0.13	0.290179	884.615	-97.4843	2.11e-05	0.821535	45.06	17.96	3.36	1593.8	1640.6
994	08_Ur16_Kw17	94	N	2	2	13	2	1	2	335	20	F	English	N			NA	Y	45	44		40	44	84	0.72619	0.878788	0.410256	RKw17	RUr16	RUr16_2301.wav	0.448	721.6	839	117.4	807.3	26.04	724	808	0.13	0.290179	884.615	-97.4843	2.11e-05	0.821535	45.06	17.96	3.36	1593.8	1640.6
995	08_Ur16_Kw17	15	N	2	4	5	2	1	2	1971	20	F	English and Chinese	N			NA	Y	58	36	didn't make it to face - just voice	NA	36	NA	0.488095	0.393939	0.461538	RKw17	RUr16	RUr16_2301.wav	0.448	721.6	839	117.4	807.3	26.04	724	808	0.13	0.290179	884.615	-97.4843	2.11e-05	0.821535	45.06	17.96	3.36	1593.8	1640.6
996	08_Ur16_Kw17	87	N	2	4	23	2	0	1	1142	19	F	Korean	N			NA	Y	53	41		NA	NA	NA	0.654762	0.787879	0.615385	RKw17	RUr16	RUr16_2301.wav	0.448	721.6	839	117.4	807.3	26.04	724	808	0.13	0.290179	884.615	-97.4843	2.11e-05	0.821535	45.06	17.96	3.36	1593.8	1640.6
997	08_Ur16_Kw17	16	N	2	1	35	2	1	2	187	21	F	English	Y	dogs, cats	6	NA	Y	44	43		38	40	78	0.559524	0.545455	0.461538	RKw17	RUr16	RUr16_2301.wav	0.448	721.6	839	117.4	807.3	26.04	724	808	0.13	0.290179	884.615	-97.4843	2.11e-05	0.821535	45.06	17.96	3.36	1593.8	1640.6
998	08_Ur16_Kw17	98	N	2	4	39	2	1	2	1707	18	F	English	N			NA	Y	36	39		37	48	85	0.690476	0.393939	0.538462	RKw17	RUr16	RUr16_2301.wav	0.448	721.6	839	117.4	807.3	26.04	724	808	0.13	0.290179	884.615	-97.4843	2.11e-05	0.821535	45.06	17.96	3.36	1593.8	1640.6
999	08_Ur16_Kw17	58	N	2	1	32	2	1	2	285	21	F	Spanish	Y	mice, rats	2	NA	Y	53	33		NA	NA	NA	0.547619	0.515152	0.461538	RKw17	RUr16	RUr16_2301.wav	0.448	721.6	839	117.4	807.3	26.04	724	808	0.13	0.290179	884.615	-97.4843	2.11e-05	0.821535	45.06	17.96	3.36	1593.8	1640.6
1000	08_Ur16_Kw17	506	Y	2	2	3	2	1	2	572	37	F	English	Y	Rhesus macaque	120	120	Y	NA	NA		NA	NA	NA	0.559524	0.424242	0.487179	RKw17	RUr16	RUr16_2301.wav	0.448	721.6	839	117.4	807.3	26.04	724	808	0.13	0.290179	884.615	-97.4843	2.11e-05	0.821535	45.06	17.96	3.36	1593.8	1640.6
1001	09_Kw17_Yg17	50	N	2	4	11	1	0	2	65	19	F	English	Y	dogs, cats	12	NA	Y	53	40		24	19	43	0.5	0.212121	0.512821	RKw17	RYg17	RKw17_2249.wav	0.514	768.1	1126.9	358.8	1042.6	115.09	768	1100	0.24	0.466926	1495.42	-98.1752	4.69e-05	1.10638	23.56	16.08	3.74	1078.1	1125
1002	09_Kw17_Yg17	69	N	2	2	29	1	1	1	1627	20	F	English	N			NA	Y	40	37		42	43	85	0.547619	0.424242	0.615385	RKw17	RYg17	RKw17_2249.wav	0.514	768.1	1126.9	358.8	1042.6	115.09	768	1100	0.24	0.466926	1495.42	-98.1752	4.69e-05	1.10638	23.56	16.08	3.74	1078.1	1125
1003	09_Kw17_Yg17	508	Y	2	2	37	1	0	2	326	40	F	English	Y	Rhesus macaque, pigtail macaque, sooty mangabey	192	120	Y	NA	NA		NA	NA	NA	0.511905	0.969697	0.641026	RKw17	RYg17	RKw17_2249.wav	0.514	768.1	1126.9	358.8	1042.6	115.09	768	1100	0.24	0.466926	1495.42	-98.1752	4.69e-05	1.10638	23.56	16.08	3.74	1078.1	1125
1004	09_Kw17_Yg17	24	N	2	2	32	1	0	2	363	20	M	English	N			NA	N	41	24		35	36	71	0.404762	0.363636	0.666667	RKw17	RYg17	RKw17_2249.wav	0.514	768.1	1126.9	358.8	1042.6	115.09	768	1100	0.24	0.466926	1495.42	-98.1752	4.69e-05	1.10638	23.56	16.08	3.74	1078.1	1125
1005	09_Kw17_Yg17	70	N	2	3	21	1	0	2	291	18	F	English	N			NA	Y	62	34		48	45	93	0.52381	0.242424	0.384615	RKw17	RYg17	RKw17_2249.wav	0.514	768.1	1126.9	358.8	1042.6	115.09	768	1100	0.24	0.466926	1495.42	-98.1752	4.69e-05	1.10638	23.56	16.08	3.74	1078.1	1125
1006	09_Kw17_Yg17	36	N	2	3	42	1	0	2	246	19	F	English	Y	dogs, cats	4	NA	Y	53	31		42	42	84	0.416667	0.606061	0.435897	RKw17	RYg17	RKw17_2249.wav	0.514	768.1	1126.9	358.8	1042.6	115.09	768	1100	0.24	0.466926	1495.42	-98.1752	4.69e-05	1.10638	23.56	16.08	3.74	1078.1	1125
1007	09_Kw17_Yg17	3	N	2	2	21	1	1	1	1051	28	M	English	N			NA	Y	39	30		45	42	87	0.559524	0.575758	0.487179	RKw17	RYg17	RKw17_2249.wav	0.514	768.1	1126.9	358.8	1042.6	115.09	768	1100	0.24	0.466926	1495.42	-98.1752	4.69e-05	1.10638	23.56	16.08	3.74	1078.1	1125
1008	09_Kw17_Yg17	17	N	2	2	6	1	1	1	567	19	F	Chinese	N			NA	Y	49	34		NA	NA	NA	0.595238	1	0.487179	RKw17	RYg17	RKw17_2249.wav	0.514	768.1	1126.9	358.8	1042.6	115.09	768	1100	0.24	0.466926	1495.42	-98.1752	4.69e-05	1.10638	23.56	16.08	3.74	1078.1	1125
1009	09_Kw17_Yg17	103	N	2	4	7	1	0	2	242	19	F	Korean + English	Y	dogs, cats	3	NA	Y	47	39		40	41	81	0.52381	0.393939	0.512821	RKw17	RYg17	RKw17_2249.wav	0.514	768.1	1126.9	358.8	1042.6	115.09	768	1100	0.24	0.466926	1495.42	-98.1752	4.69e-05	1.10638	23.56	16.08	3.74	1078.1	1125
1010	09_Kw17_Yg17	93	N	2	1	40	1	1	1	452	19	F	English	N			NA	Y	53	37		38	38	76	0.52381	0.30303	0.487179	RKw17	RYg17	RKw17_2249.wav	0.514	768.1	1126.9	358.8	1042.6	115.09	768	1100	0.24	0.466926	1495.42	-98.1752	4.69e-05	1.10638	23.56	16.08	3.74	1078.1	1125
1011	09_Kw17_Yg17	67	N	2	3	23	1	0	2	1309	18	F	English	N			NA	N	29	44		32	32	64	0.75	0.636364	0.564103	RKw17	RYg17	RKw17_2249.wav	0.514	768.1	1126.9	358.8	1042.6	115.09	768	1100	0.24	0.466926	1495.42	-98.1752	4.69e-05	1.10638	23.56	16.08	3.74	1078.1	1125
1012	09_Kw17_Yg17	113	N	2	3	4	1	0	2	1551	18	F	English	N			NA	Y	52	38		47	41	88	0.583333	0.848485	0.564103	RKw17	RYg17	RKw17_2249.wav	0.514	768.1	1126.9	358.8	1042.6	115.09	768	1100	0.24	0.466926	1495.42	-98.1752	4.69e-05	1.10638	23.56	16.08	3.74	1078.1	1125
1013	09_Kw17_Yg17	77	N	2	3	40	1	1	1	863	19	M	Chinese	N			NA	Y	46	18		NA	NA	NA	0.595238	0.454545	0.538462	RKw17	RYg17	RKw17_2249.wav	0.514	768.1	1126.9	358.8	1042.6	115.09	768	1100	0.24	0.466926	1495.42	-98.1752	4.69e-05	1.10638	23.56	16.08	3.74	1078.1	1125
1014	09_Kw17_Yg17	1	N	2	1	22	1	1	1	525	20	F	English	Y	cats, dogs	12	NA	Y	38	33		NA	40	NA	0.642857	0.333333	0.564103	RKw17	RYg17	RKw17_2249.wav	0.514	768.1	1126.9	358.8	1042.6	115.09	768	1100	0.24	0.466926	1495.42	-98.1752	4.69e-05	1.10638	23.56	16.08	3.74	1078.1	1125
1015	09_Kw17_Yg17	101	N	2	4	14	1	1	1	268	19	F	English	Y	mice	11	NA	Y	50	40		43	43	86	0.690476	0.484848	0.487179	RKw17	RYg17	RKw17_2249.wav	0.514	768.1	1126.9	358.8	1042.6	115.09	768	1100	0.24	0.466926	1495.42	-98.1752	4.69e-05	1.10638	23.56	16.08	3.74	1078.1	1125
1016	09_Kw17_Yg17	15	N	2	4	26	1	0	2	628	20	F	English and Chinese	N			NA	Y	58	36	didn't make it to face - just voice	NA	36	NA	0.488095	0.393939	0.461538	RKw17	RYg17	RKw17_2249.wav	0.514	768.1	1126.9	358.8	1042.6	115.09	768	1100	0.24	0.466926	1495.42	-98.1752	4.69e-05	1.10638	23.56	16.08	3.74	1078.1	1125
1017	09_Kw17_Yg17	49	N	2	4	1	1	0	2	294	18	F	English	N			NA	N	44	28		42	2	44	0.642857	0.454545	0.487179	RKw17	RYg17	RKw17_2249.wav	0.514	768.1	1126.9	358.8	1042.6	115.09	768	1100	0.24	0.466926	1495.42	-98.1752	4.69e-05	1.10638	23.56	16.08	3.74	1078.1	1125
1018	09_Kw17_Yg17	512	Y	2	2	19	1	0	2	255	39	M	English	Y	Rhesus macaque, pigtail macaque, common chimpanzee, west lowland gorilla, Sooty mangabey	144	144	Y	NA	NA	occasionally needed to answer radio during task	NA	NA	NA	0.642857	1	0.589744	RKw17	RYg17	RKw17_2249.wav	0.514	768.1	1126.9	358.8	1042.6	115.09	768	1100	0.24	0.466926	1495.42	-98.1752	4.69e-05	1.10638	23.56	16.08	3.74	1078.1	1125
1019	09_Kw17_Yg17	110	N	2	1	14	1	0	2	246	19	M	English	N			NA	Y	40	32		35	38	73	0.511905	0.69697	0.564103	RKw17	RYg17	RKw17_2249.wav	0.514	768.1	1126.9	358.8	1042.6	115.09	768	1100	0.24	0.466926	1495.42	-98.1752	4.69e-05	1.10638	23.56	16.08	3.74	1078.1	1125
1020	09_Kw17_Yg17	107	N	2	4	35	1	1	1	704	22	F	Chinese	N			NA	N	21	37		NA	NA	NA	0.595238	0.424242	0.435897	RKw17	RYg17	RKw17_2249.wav	0.514	768.1	1126.9	358.8	1042.6	115.09	768	1100	0.24	0.466926	1495.42	-98.1752	4.69e-05	1.10638	23.56	16.08	3.74	1078.1	1125
1021	09_Kw17_Yg17	89	N	2	1	17	1	1	1	713	18	F	Spanish	N			NA	Y	50	37		NA	NA	NA	0.619048	0.818182	0.589744	RKw17	RYg17	RKw17_2249.wav	0.514	768.1	1126.9	358.8	1042.6	115.09	768	1100	0.24	0.466926	1495.42	-98.1752	4.69e-05	1.10638	23.56	16.08	3.74	1078.1	1125
1022	09_Kw17_Yg17	76	N	2	4	36	1	1	1	584	19	F	Chinese	N			NA	Y	41	41		NA	NA	NA	0.630952	0.393939	0.538462	RKw17	RYg17	RKw17_2249.wav	0.514	768.1	1126.9	358.8	1042.6	115.09	768	1100	0.24	0.466926	1495.42	-98.1752	4.69e-05	1.10638	23.56	16.08	3.74	1078.1	1125
1023	09_Kw17_Yg17	53	N	2	1	4	1	1	1	363	18	F	English	N			NA	N	71	47		22	17	39	0.642857	0.787879	0.641026	RKw17	RYg17	RKw17_2249.wav	0.514	768.1	1126.9	358.8	1042.6	115.09	768	1100	0.24	0.466926	1495.42	-98.1752	4.69e-05	1.10638	23.56	16.08	3.74	1078.1	1125
1024	09_Kw17_Yg17	14	N	2	1	21	1	1	1	555	19	M	English and Mandarin	N			NA	N	43	35		32	39	71	0.642857	0.818182	0.615385	RKw17	RYg17	RKw17_2249.wav	0.514	768.1	1126.9	358.8	1042.6	115.09	768	1100	0.24	0.466926	1495.42	-98.1752	4.69e-05	1.10638	23.56	16.08	3.74	1078.1	1125
1025	09_Kw17_Yg17	66	N	2	2	42	1	1	1	2220	20	M	Chinese	N			NA	N	41	38		NA	NA	NA	0.47619	0.69697	0.512821	RKw17	RYg17	RKw17_2249.wav	0.514	768.1	1126.9	358.8	1042.6	115.09	768	1100	0.24	0.466926	1495.42	-98.1752	4.69e-05	1.10638	23.56	16.08	3.74	1078.1	1125
1026	09_Kw17_Yg17	26	N	2	1	25	1	0	2	290	24	M	Telugu	N			NA	N	41	35		NA	NA	NA	0.607143	0.515152	0.538462	RKw17	RYg17	RKw17_2249.wav	0.514	768.1	1126.9	358.8	1042.6	115.09	768	1100	0.24	0.466926	1495.42	-98.1752	4.69e-05	1.10638	23.56	16.08	3.74	1078.1	1125
1027	09_Kw17_Yg17	20	Y	2	2	35	1	0	2	284	37	F	English	Y	Rhesus, chimpanzees, dogs, cats, mice, rats	180	132	Y	52	33		46	47	93	0.392857	0.454545	0.589744	RKw17	RYg17	RKw17_2249.wav	0.514	768.1	1126.9	358.8	1042.6	115.09	768	1100	0.24	0.466926	1495.42	-98.1752	4.69e-05	1.10638	23.56	16.08	3.74	1078.1	1125
1028	09_Kw17_Yg17	72	N	2	3	11	1	0	2	593	19	F	English	N			NA	Y	48	33		35	31	66	0.511905	0.69697	0.538462	RKw17	RYg17	RKw17_2249.wav	0.514	768.1	1126.9	358.8	1042.6	115.09	768	1100	0.24	0.466926	1495.42	-98.1752	4.69e-05	1.10638	23.56	16.08	3.74	1078.1	1125
1029	09_Kw17_Yg17	507	Y	2	1	33	1	0	2	3667	27	F	English	Y	Rhesus macaque, tufted capuchins	60	48	Y	NA	NA		NA	NA	NA	0.547619	1	0.666667	RKw17	RYg17	RKw17_2249.wav	0.514	768.1	1126.9	358.8	1042.6	115.09	768	1100	0.24	0.466926	1495.42	-98.1752	4.69e-05	1.10638	23.56	16.08	3.74	1078.1	1125
1030	09_Kw17_Yg17	37	N	2	2	26	1	0	2	423	19	F	Spanish	N			NA	Y	44	32		NA	NA	NA	0.52381	0.606061	0.641026	RKw17	RYg17	RKw17_2249.wav	0.514	768.1	1126.9	358.8	1042.6	115.09	768	1100	0.24	0.466926	1495.42	-98.1752	4.69e-05	1.10638	23.56	16.08	3.74	1078.1	1125
1031	09_Kw17_Yg17	84	N	2	3	19	1	1	1	721	19	F	English	N			NA	Y	34	36		35	37	72	0.547619	0.575758	0.512821	RKw17	RYg17	RKw17_2249.wav	0.514	768.1	1126.9	358.8	1042.6	115.09	768	1100	0.24	0.466926	1495.42	-98.1752	4.69e-05	1.10638	23.56	16.08	3.74	1078.1	1125
1032	09_Kw17_Yg17	9	N	2	1	4	1	0	2	1052	19	M	English	Y	dogs, cats	3	NA	Y	41	31		35	32	67	0.416667	0.121212	0.435897	RKw17	RYg17	RKw17_2249.wav	0.514	768.1	1126.9	358.8	1042.6	115.09	768	1100	0.24	0.466926	1495.42	-98.1752	4.69e-05	1.10638	23.56	16.08	3.74	1078.1	1125
1033	09_Kw17_Yg17	105	N	2	2	25	1	0	2	590	19	F	English	N			NA	Y	44	36		40	42	82	0.571429	0.606061	0.435897	RKw17	RYg17	RKw17_2249.wav	0.514	768.1	1126.9	358.8	1042.6	115.09	768	1100	0.24	0.466926	1495.42	-98.1752	4.69e-05	1.10638	23.56	16.08	3.74	1078.1	1125
1034	09_Kw17_Yg17	88	N	2	1	40	1	1	1	291	19	M	Mandarin	N			NA	Y	49	27		NA	NA	NA	0.547619	0.818182	0.538462	RKw17	RYg17	RKw17_2249.wav	0.514	768.1	1126.9	358.8	1042.6	115.09	768	1100	0.24	0.466926	1495.42	-98.1752	4.69e-05	1.10638	23.56	16.08	3.74	1078.1	1125
1035	09_Kw17_Yg17	29	N	2	1	34	1	1	1	3227	19	F	English	Y	dogs, cats	3	NA	Y	63	44		47	41	88	0.547619	0.454545	0.512821	RKw17	RYg17	RKw17_2249.wav	0.514	768.1	1126.9	358.8	1042.6	115.09	768	1100	0.24	0.466926	1495.42	-98.1752	4.69e-05	1.10638	23.56	16.08	3.74	1078.1	1125
1036	09_Kw17_Yg17	75	N	2	2	19	1	1	1	812	19	M	Chinese	Y	fruitfly, termites	1.5	NA	N	58	38		NA	NA	NA	0.547619	0.484848	0.461538	RKw17	RYg17	RKw17_2249.wav	0.514	768.1	1126.9	358.8	1042.6	115.09	768	1100	0.24	0.466926	1495.42	-98.1752	4.69e-05	1.10638	23.56	16.08	3.74	1078.1	1125
1037	09_Kw17_Yg17	10	N	2	3	42	1	0	2	2629	21	F	English	N			NA	Y	50	38		36	38	74	0.559524	0.757576	0.358974	RKw17	RYg17	RKw17_2249.wav	0.514	768.1	1126.9	358.8	1042.6	115.09	768	1100	0.24	0.466926	1495.42	-98.1752	4.69e-05	1.10638	23.56	16.08	3.74	1078.1	1125
1038	09_Kw17_Yg17	47	N	2	3	12	1	1	1	220	18	F	English	N			NA	Y	60	42		42	45	87	0.47619	0.30303	0.333333	RKw17	RYg17	RKw17_2249.wav	0.514	768.1	1126.9	358.8	1042.6	115.09	768	1100	0.24	0.466926	1495.42	-98.1752	4.69e-05	1.10638	23.56	16.08	3.74	1078.1	1125
1039	09_Kw17_Yg17	59	N	2	1	24	1	0	2	247	18	M	Gujarati	N			NA	N	37	38		NA	NA	NA	0.52381	0.393939	0.666667	RKw17	RYg17	RKw17_2249.wav	0.514	768.1	1126.9	358.8	1042.6	115.09	768	1100	0.24	0.466926	1495.42	-98.1752	4.69e-05	1.10638	23.56	16.08	3.74	1078.1	1125
1040	09_Kw17_Yg17	30	N	2	1	2	1	1	1	1291	19	F	Chinese	N			NA	N	43	31		NA	NA	NA	0.535714	0.151515	0.641026	RKw17	RYg17	RKw17_2249.wav	0.514	768.1	1126.9	358.8	1042.6	115.09	768	1100	0.24	0.466926	1495.42	-98.1752	4.69e-05	1.10638	23.56	16.08	3.74	1078.1	1125
1041	09_Kw17_Yg17	31	N	2	4	24	1	1	1	1000	18	F	English	N			NA	Y	47	35		38	40	78	0.583333	0.575758	0.384615	RKw17	RYg17	RKw17_2249.wav	0.514	768.1	1126.9	358.8	1042.6	115.09	768	1100	0.24	0.466926	1495.42	-98.1752	4.69e-05	1.10638	23.56	16.08	3.74	1078.1	1125
1042	09_Kw17_Yg17	58	N	2	1	4	1	1	1	274	21	F	Spanish	Y	mice, rats	2	NA	Y	53	33		NA	NA	NA	0.547619	0.515152	0.461538	RKw17	RYg17	RKw17_2249.wav	0.514	768.1	1126.9	358.8	1042.6	115.09	768	1100	0.24	0.466926	1495.42	-98.1752	4.69e-05	1.10638	23.56	16.08	3.74	1078.1	1125
1043	09_Kw17_Yg17	100	N	2	3	10	1	0	2	1191	21	F	Mandarin	N			NA	Y	50	36		NA	NA	NA	0.619048	0.424242	0.641026	RKw17	RYg17	RKw17_2249.wav	0.514	768.1	1126.9	358.8	1042.6	115.09	768	1100	0.24	0.466926	1495.42	-98.1752	4.69e-05	1.10638	23.56	16.08	3.74	1078.1	1125
1044	09_Kw17_Yg17	5	N	2	3	3	1	0	2	238	29	F	English	Y	cat, dog, horse, cow	6+ years	NA	Y	41	35		46	49	95	0.583333	0.393939	0.564103	RKw17	RYg17	RKw17_2249.wav	0.514	768.1	1126.9	358.8	1042.6	115.09	768	1100	0.24	0.466926	1495.42	-98.1752	4.69e-05	1.10638	23.56	16.08	3.74	1078.1	1125
1045	09_Kw17_Yg17	63	N	2	4	26	1	1	1	623	19	F	English	N			NA	N	60	40		44	42	86	0.535714	0	0.717949	RKw17	RYg17	RKw17_2249.wav	0.514	768.1	1126.9	358.8	1042.6	115.09	768	1100	0.24	0.466926	1495.42	-98.1752	4.69e-05	1.10638	23.56	16.08	3.74	1078.1	1125
1046	09_Kw17_Yg17	2	N	2	3	27	1	0	2	331	19	F	English	N			NA	Y	49	42		36	37	73	0.595238	0.0606061	0.641026	RKw17	RYg17	RKw17_2249.wav	0.514	768.1	1126.9	358.8	1042.6	115.09	768	1100	0.24	0.466926	1495.42	-98.1752	4.69e-05	1.10638	23.56	16.08	3.74	1078.1	1125
1047	09_Kw17_Yg17	61	N	2	4	11	1	0	2	1602	19	M	English	N			NA	Y	42	36		43	35	78	0.619048	0.424242	0.461538	RKw17	RYg17	RKw17_2249.wav	0.514	768.1	1126.9	358.8	1042.6	115.09	768	1100	0.24	0.466926	1495.42	-98.1752	4.69e-05	1.10638	23.56	16.08	3.74	1078.1	1125
1048	09_Kw17_Yg17	104	N	2	1	42	1	0	2	333	19	F	Bangla	N			NA	N	49	31		NA	NA	NA	0.619048	0.363636	0.384615	RKw17	RYg17	RKw17_2249.wav	0.514	768.1	1126.9	358.8	1042.6	115.09	768	1100	0.24	0.466926	1495.42	-98.1752	4.69e-05	1.10638	23.56	16.08	3.74	1078.1	1125
1049	09_Kw17_Yg17	46	N	2	3	21	1	0	2	738	18	F	English	N			NA	Y	45	25		39	42	81	0.619048	0.515152	0.589744	RKw17	RYg17	RKw17_2249.wav	0.514	768.1	1126.9	358.8	1042.6	115.09	768	1100	0.24	0.466926	1495.42	-98.1752	4.69e-05	1.10638	23.56	16.08	3.74	1078.1	1125
1050	09_Kw17_Yg17	505	Y	2	2	12	1	1	1	442	30	F	English	Y	Rhesus macaque, horses, dogs, cats, birds, mangabey	120	94	Y	NA	NA		NA	NA	NA	0.595238	1	0.589744	RKw17	RYg17	RKw17_2249.wav	0.514	768.1	1126.9	358.8	1042.6	115.09	768	1100	0.24	0.466926	1495.42	-98.1752	4.69e-05	1.10638	23.56	16.08	3.74	1078.1	1125
1051	09_Kw17_Yg17	83	N	2	3	34	1	0	2	292	19	F	English	N			NA	Y	55	46		48	46	94	0.5	0.333333	0.487179	RKw17	RYg17	RKw17_2249.wav	0.514	768.1	1126.9	358.8	1042.6	115.09	768	1100	0.24	0.466926	1495.42	-98.1752	4.69e-05	1.10638	23.56	16.08	3.74	1078.1	1125
1052	09_Kw17_Yg17	40	N	2	2	28	1	1	1	317	19	F	Chinese	N			NA	N	39	39		NA	NA	NA	0.666667	0.515152	0.512821	RKw17	RYg17	RKw17_2249.wav	0.514	768.1	1126.9	358.8	1042.6	115.09	768	1100	0.24	0.466926	1495.42	-98.1752	4.69e-05	1.10638	23.56	16.08	3.74	1078.1	1125
1053	09_Kw17_Yg17	7	N	2	1	33	1	1	1	1100	21	F	English	N			NA	Y	49	33		44	43	87	0.583333	0.363636	0.615385	RKw17	RYg17	RKw17_2249.wav	0.514	768.1	1126.9	358.8	1042.6	115.09	768	1100	0.24	0.466926	1495.42	-98.1752	4.69e-05	1.10638	23.56	16.08	3.74	1078.1	1125
1054	09_Kw17_Yg17	74	N	2	4	36	1	1	1	439	19	F	English	Y	cats, dogs	1	NA	Y	47	41		41	43	84	0.428571	0.272727	0.538462	RKw17	RYg17	RKw17_2249.wav	0.514	768.1	1126.9	358.8	1042.6	115.09	768	1100	0.24	0.466926	1495.42	-98.1752	4.69e-05	1.10638	23.56	16.08	3.74	1078.1	1125
1055	09_Kw17_Yg17	111	N	2	3	29	1	0	2	2692	21	F	English	N			NA	N	39	39		40	36	76	0.511905	0.575758	0.512821	RKw17	RYg17	RKw17_2249.wav	0.514	768.1	1126.9	358.8	1042.6	115.09	768	1100	0.24	0.466926	1495.42	-98.1752	4.69e-05	1.10638	23.56	16.08	3.74	1078.1	1125
1056	09_Kw17_Yg17	73	N	2	1	23	1	0	2	276	19	F	English and Chinese	N			NA	Y	41	37		34	36	70	0.571429	0.575758	0.538462	RKw17	RYg17	RKw17_2249.wav	0.514	768.1	1126.9	358.8	1042.6	115.09	768	1100	0.24	0.466926	1495.42	-98.1752	4.69e-05	1.10638	23.56	16.08	3.74	1078.1	1125
1057	09_Kw17_Yg17	506	Y	2	2	25	1	0	2	440	37	F	English	Y	Rhesus macaque	120	120	Y	NA	NA		NA	NA	NA	0.559524	0.424242	0.487179	RKw17	RYg17	RKw17_2249.wav	0.514	768.1	1126.9	358.8	1042.6	115.09	768	1100	0.24	0.466926	1495.42	-98.1752	4.69e-05	1.10638	23.56	16.08	3.74	1078.1	1125
1058	09_Kw17_Yg17	12	N	2	4	17	1	1	1	1349	21	M	Chinese	N			NA	Y	41	34		NA	NA	NA	0.642857	0.484848	0.410256	RKw17	RYg17	RKw17_2249.wav	0.514	768.1	1126.9	358.8	1042.6	115.09	768	1100	0.24	0.466926	1495.42	-98.1752	4.69e-05	1.10638	23.56	16.08	3.74	1078.1	1125
1059	09_Kw17_Yg17	108	N	2	2	17	1	1	1	222	19	M	English	N			NA	N	59	24		45	43	88	0.571429	0.393939	0.435897	RKw17	RYg17	RKw17_2249.wav	0.514	768.1	1126.9	358.8	1042.6	115.09	768	1100	0.24	0.466926	1495.42	-98.1752	4.69e-05	1.10638	23.56	16.08	3.74	1078.1	1125
1060	09_Kw17_Yg17	39	N	2	3	33	1	1	1	636	19	F	Spanish/English	N			NA	Y	55	38		41	43	84	0.583333	0.454545	0.538462	RKw17	RYg17	RKw17_2249.wav	0.514	768.1	1126.9	358.8	1042.6	115.09	768	1100	0.24	0.466926	1495.42	-98.1752	4.69e-05	1.10638	23.56	16.08	3.74	1078.1	1125
1061	09_Kw17_Yg17	501	Y	2	4	1	1	0	2	2674	26	M	English	Y	lemurs (black white ruffed, ringtail, red bellied, crown, mongoose), Rhesus monkeys, gorillas, orangutans	Lemur: 24, Rh: 48, Gorilla: 12, Orangutan: 12	48	Y	47	37		46	44	90	0.559524	0.69697	0.461538	RKw17	RYg17	RKw17_2249.wav	0.514	768.1	1126.9	358.8	1042.6	115.09	768	1100	0.24	0.466926	1495.42	-98.1752	4.69e-05	1.10638	23.56	16.08	3.74	1078.1	1125
1062	09_Kw17_Yg17	34	N	2	3	39	1	1	1	445	24	M	Mandarin	N			NA	N	15	37		NA	NA	NA	0.511905	0.757576	0.282051	RKw17	RYg17	RKw17_2249.wav	0.514	768.1	1126.9	358.8	1042.6	115.09	768	1100	0.24	0.466926	1495.42	-98.1752	4.69e-05	1.10638	23.56	16.08	3.74	1078.1	1125
1063	09_Kw17_Yg17	95	N	2	2	10	1	0	2	303	20	F	English	N			NA	Y	57	30		39	44	83	0.571429	0.363636	0.564103	RKw17	RYg17	RKw17_2249.wav	0.514	768.1	1126.9	358.8	1042.6	115.09	768	1100	0.24	0.466926	1495.42	-98.1752	4.69e-05	1.10638	23.56	16.08	3.74	1078.1	1125
1064	09_Kw17_Yg17	115	N	2	4	5	1	1	1	622	18	M	Mandarin	N			NA	N	31	37		NA	NA	NA	0.583333	0.575758	0.461538	RKw17	RYg17	RKw17_2249.wav	0.514	768.1	1126.9	358.8	1042.6	115.09	768	1100	0.24	0.466926	1495.42	-98.1752	4.69e-05	1.10638	23.56	16.08	3.74	1078.1	1125
1065	09_Kw17_Yg17	48	N	2	1	10	1	1	1	2619	19	F	English	N			NA	Y	33	36		36	46	82	0.654762	0.606061	0.564103	RKw17	RYg17	RKw17_2249.wav	0.514	768.1	1126.9	358.8	1042.6	115.09	768	1100	0.24	0.466926	1495.42	-98.1752	4.69e-05	1.10638	23.56	16.08	3.74	1078.1	1125
1066	09_Kw17_Yg17	102	N	2	1	17	1	0	2	402	18	F	English	Y	elephants, dogs, tortoises	3	NA	Y	46	44		33	36	69	0.559524	0.424242	0.461538	RKw17	RYg17	RKw17_2249.wav	0.514	768.1	1126.9	358.8	1042.6	115.09	768	1100	0.24	0.466926	1495.42	-98.1752	4.69e-05	1.10638	23.56	16.08	3.74	1078.1	1125
1067	09_Kw17_Yg17	65	N	2	2	31	1	1	1	585	20	F	Arabic	Y			NA	N	36	35		NA	NA	NA	0.559524	0.363636	0.564103	RKw17	RYg17	RKw17_2249.wav	0.514	768.1	1126.9	358.8	1042.6	115.09	768	1100	0.24	0.466926	1495.42	-98.1752	4.69e-05	1.10638	23.56	16.08	3.74	1078.1	1125
1068	09_Kw17_Yg17	513	Y	2	1	41	1	0	2	962	53	F	English	Y	chimps, bonobos, Rhesus macaque, Sooty mangabeys, pigtail macaque, gibbons, orangutan, stumptail macaques, baboons	288	288	Y	NA	NA		NA	NA	NA	0.535714	0.969697	0.589744	RKw17	RYg17	RKw17_2249.wav	0.514	768.1	1126.9	358.8	1042.6	115.09	768	1100	0.24	0.466926	1495.42	-98.1752	4.69e-05	1.10638	23.56	16.08	3.74	1078.1	1125
1069	09_Kw17_Yg17	87	N	2	4	41	1	1	1	1758	19	F	Korean	N			NA	Y	53	41		NA	NA	NA	0.654762	0.787879	0.615385	RKw17	RYg17	RKw17_2249.wav	0.514	768.1	1126.9	358.8	1042.6	115.09	768	1100	0.24	0.466926	1495.42	-98.1752	4.69e-05	1.10638	23.56	16.08	3.74	1078.1	1125
1070	09_Kw17_Yg17	80	N	2	4	4	1	1	1	131	18	F	English	N			NA	Y	57	34		36	3	39	0.607143	0.545455	0.358974	RKw17	RYg17	RKw17_2249.wav	0.514	768.1	1126.9	358.8	1042.6	115.09	768	1100	0.24	0.466926	1495.42	-98.1752	4.69e-05	1.10638	23.56	16.08	3.74	1078.1	1125
1071	09_Kw17_Yg17	106	N	2	4	2	1	0	2	781	18	F	Korean	N			NA	Y	53	39		NA	NA	NA	0.607143	0.606061	0.461538	RKw17	RYg17	RKw17_2249.wav	0.514	768.1	1126.9	358.8	1042.6	115.09	768	1100	0.24	0.466926	1495.42	-98.1752	4.69e-05	1.10638	23.56	16.08	3.74	1078.1	1125
1072	09_Kw17_Yg17	68	N	2	2	34	1	1	1	348	19	M	Spanish	N			NA	N	48	NA	didn't fill out this questionnaire animal	NA	NA	NA	0.607143	0.333333	0.641026	RKw17	RYg17	RKw17_2249.wav	0.514	768.1	1126.9	358.8	1042.6	115.09	768	1100	0.24	0.466926	1495.42	-98.1752	4.69e-05	1.10638	23.56	16.08	3.74	1078.1	1125
1073	09_Kw17_Yg17	11	N	2	4	11	1	0	2	1934	20	F	English (mainly) + Hindi	Y	dogs	6	NA	Y	66	45	noted w/ regard to coos that it is upsetting - sounds like they're in pain. Noted surpirse that screams would be more intense context than coos	34	41	75	0.666667	0.545455	0.641026	RKw17	RYg17	RKw17_2249.wav	0.514	768.1	1126.9	358.8	1042.6	115.09	768	1100	0.24	0.466926	1495.42	-98.1752	4.69e-05	1.10638	23.56	16.08	3.74	1078.1	1125
1074	09_Kw17_Yg17	55	N	2	4	30	1	0	2	97	18	F	Mandarin	N			NA	Y	64	30		NA	NA	NA	0.690476	0.515152	0.410256	RKw17	RYg17	RKw17_2249.wav	0.514	768.1	1126.9	358.8	1042.6	115.09	768	1100	0.24	0.466926	1495.42	-98.1752	4.69e-05	1.10638	23.56	16.08	3.74	1078.1	1125
1075	09_Kw17_Yg17	22	N	2	1	39	1	1	1	2079	31	F	English	Y	dogs, cats	6	NA	Y	56	49		47	46	93	0.452381	0.515152	0.692308	RKw17	RYg17	RKw17_2249.wav	0.514	768.1	1126.9	358.8	1042.6	115.09	768	1100	0.24	0.466926	1495.42	-98.1752	4.69e-05	1.10638	23.56	16.08	3.74	1078.1	1125
1076	09_Kw17_Yg17	32	N	2	1	26	1	1	1	812	23	F	English	N			NA	N	58	26		34	33	67	0.559524	0.424242	0.435897	RKw17	RYg17	RKw17_2249.wav	0.514	768.1	1126.9	358.8	1042.6	115.09	768	1100	0.24	0.466926	1495.42	-98.1752	4.69e-05	1.10638	23.56	16.08	3.74	1078.1	1125
1077	09_Kw17_Yg17	41	N	2	4	30	1	1	1	314	20	M	Vietnamese	N			NA	Y	45	29		NA	NA	NA	0.630952	0.454545	0.435897	RKw17	RYg17	RKw17_2249.wav	0.514	768.1	1126.9	358.8	1042.6	115.09	768	1100	0.24	0.466926	1495.42	-98.1752	4.69e-05	1.10638	23.56	16.08	3.74	1078.1	1125
1078	09_Kw17_Yg17	109	N	2	3	25	1	0	2	667	20	F	English	N			NA	Y	41	33		45	43	88	0.666667	0.727273	0.384615	RKw17	RYg17	RKw17_2249.wav	0.514	768.1	1126.9	358.8	1042.6	115.09	768	1100	0.24	0.466926	1495.42	-98.1752	4.69e-05	1.10638	23.56	16.08	3.74	1078.1	1125
1079	09_Kw17_Yg17	96	N	2	1	1	1	1	1	1203	18	F	English	N			NA	Y	59	39		44	47	91	0.583333	0.727273	0.512821	RKw17	RYg17	RKw17_2249.wav	0.514	768.1	1126.9	358.8	1042.6	115.09	768	1100	0.24	0.466926	1495.42	-98.1752	4.69e-05	1.10638	23.56	16.08	3.74	1078.1	1125
1080	09_Kw17_Yg17	79	N	2	1	13	1	1	1	75	21	M	English	N			NA	Y	55	38		33	34	67	0.571429	0.393939	0.564103	RKw17	RYg17	RKw17_2249.wav	0.514	768.1	1126.9	358.8	1042.6	115.09	768	1100	0.24	0.466926	1495.42	-98.1752	4.69e-05	1.10638	23.56	16.08	3.74	1078.1	1125
1081	09_Kw17_Yg17	82	N	2	2	16	1	1	1	243	18	F	Korean	Y	dogs, cats	3	NA	Y	31	40		NA	NA	NA	0.559524	0.333333	0.641026	RKw17	RYg17	RKw17_2249.wav	0.514	768.1	1126.9	358.8	1042.6	115.09	768	1100	0.24	0.466926	1495.42	-98.1752	4.69e-05	1.10638	23.56	16.08	3.74	1078.1	1125
1082	09_Kw17_Yg17	44	N	2	1	24	1	1	1	495	31	F	English	N			NA	Y	39	34		47	45	92	0.571429	0.606061	0.333333	RKw17	RYg17	RKw17_2249.wav	0.514	768.1	1126.9	358.8	1042.6	115.09	768	1100	0.24	0.466926	1495.42	-98.1752	4.69e-05	1.10638	23.56	16.08	3.74	1078.1	1125
1083	09_Kw17_Yg17	85	N	2	1	40	1	0	2	341	19	F	Chinese	N			NA	Y	25	32		NA	NA	NA	0.571429	0.363636	0.435897	RKw17	RYg17	RKw17_2249.wav	0.514	768.1	1126.9	358.8	1042.6	115.09	768	1100	0.24	0.466926	1495.42	-98.1752	4.69e-05	1.10638	23.56	16.08	3.74	1078.1	1125
1084	09_Kw17_Yg17	502	Y	2	1	25	1	1	1	904	39	F	English	Y	Rhesus, pigrails, gorillas, orangutans, lemurs	216	204	Y	63	30		45	43	88	0.642857	0.909091	0.666667	RKw17	RYg17	RKw17_2249.wav	0.514	768.1	1126.9	358.8	1042.6	115.09	768	1100	0.24	0.466926	1495.42	-98.1752	4.69e-05	1.10638	23.56	16.08	3.74	1078.1	1125
1085	09_Kw17_Yg17	35	N	2	1	26	1	1	1	393	19	M	English	N			NA	N	40	21		44	39	83	0.666667	0.818182	0.641026	RKw17	RYg17	RKw17_2249.wav	0.514	768.1	1126.9	358.8	1042.6	115.09	768	1100	0.24	0.466926	1495.42	-98.1752	4.69e-05	1.10638	23.56	16.08	3.74	1078.1	1125
1086	09_Kw17_Yg17	81	N	2	4	26	1	1	1	198	18	F	English	N			NA	Y	53	33		43	51	94	0.690476	0.454545	0.538462	RKw17	RYg17	RKw17_2249.wav	0.514	768.1	1126.9	358.8	1042.6	115.09	768	1100	0.24	0.466926	1495.42	-98.1752	4.69e-05	1.10638	23.56	16.08	3.74	1078.1	1125
1087	09_Kw17_Yg17	60	N	2	2	24	1	1	1	311	18	F	Chinese	N			NA	Y	54	33		NA	NA	NA	0.595238	0.69697	0.615385	RKw17	RYg17	RKw17_2249.wav	0.514	768.1	1126.9	358.8	1042.6	115.09	768	1100	0.24	0.466926	1495.42	-98.1752	4.69e-05	1.10638	23.56	16.08	3.74	1078.1	1125
1088	09_Kw17_Yg17	25	N	2	3	11	1	1	1	390	21	M	English	N			NA	N	56	32		34	41	75	0.5	0.575758	0.461538	RKw17	RYg17	RKw17_2249.wav	0.514	768.1	1126.9	358.8	1042.6	115.09	768	1100	0.24	0.466926	1495.42	-98.1752	4.69e-05	1.10638	23.56	16.08	3.74	1078.1	1125
1089	09_Kw17_Yg17	23	N	2	3	14	1	0	2	437	20	F	Mandarin	N			NA	N	38	33		NA	NA	NA	0.52381	0.575758	0.564103	RKw17	RYg17	RKw17_2249.wav	0.514	768.1	1126.9	358.8	1042.6	115.09	768	1100	0.24	0.466926	1495.42	-98.1752	4.69e-05	1.10638	23.56	16.08	3.74	1078.1	1125
1090	09_Kw17_Yg17	42	N	2	2	8	1	0	2	1560	19	F	English	N			NA	N	35	28		44	44	88	0.571429	0.454545	0.692308	RKw17	RYg17	RKw17_2249.wav	0.514	768.1	1126.9	358.8	1042.6	115.09	768	1100	0.24	0.466926	1495.42	-98.1752	4.69e-05	1.10638	23.56	16.08	3.74	1078.1	1125
1091	09_Kw17_Yg17	114	N	2	1	27	1	1	1	597	19	M	English	N			NA	Y	58	35		36	38	74	0.607143	0.393939	0.512821	RKw17	RYg17	RKw17_2249.wav	0.514	768.1	1126.9	358.8	1042.6	115.09	768	1100	0.24	0.466926	1495.42	-98.1752	4.69e-05	1.10638	23.56	16.08	3.74	1078.1	1125
1092	09_Kw17_Yg17	33	N	2	2	40	1	1	1	187	19	F	Mandarin + English	N			NA	Y	56	33		NA	NA	NA	0.571429	0.272727	0.615385	RKw17	RYg17	RKw17_2249.wav	0.514	768.1	1126.9	358.8	1042.6	115.09	768	1100	0.24	0.466926	1495.42	-98.1752	4.69e-05	1.10638	23.56	16.08	3.74	1078.1	1125
1093	09_Kw17_Yg17	18	N	2	2	41	1	1	1	848	20	F	English	N			NA	Y	44	35		32	42	74	0.571429	0.151515	0.333333	RKw17	RYg17	RKw17_2249.wav	0.514	768.1	1126.9	358.8	1042.6	115.09	768	1100	0.24	0.466926	1495.42	-98.1752	4.69e-05	1.10638	23.56	16.08	3.74	1078.1	1125
1094	09_Kw17_Yg17	57	N	2	4	39	1	0	2	235	20	F	English	N			NA	N	29	31		27	41	68	0.547619	0.333333	0.538462	RKw17	RYg17	RKw17_2249.wav	0.514	768.1	1126.9	358.8	1042.6	115.09	768	1100	0.24	0.466926	1495.42	-98.1752	4.69e-05	1.10638	23.56	16.08	3.74	1078.1	1125
1095	09_Kw17_Yg17	71	N	2	2	42	1	0	2	8	19	M	English	N			NA	Y	44	36		43	43	86	0.595238	0.424242	0.333333	RKw17	RYg17	RKw17_2249.wav	0.514	768.1	1126.9	358.8	1042.6	115.09	768	1100	0.24	0.466926	1495.42	-98.1752	4.69e-05	1.10638	23.56	16.08	3.74	1078.1	1125
1096	09_Kw17_Yg17	51	N	2	1	6	1	1	1	349	18	F	English	N			NA	Y	31	36		45	44	89	0.654762	0.515152	0.615385	RKw17	RYg17	RKw17_2249.wav	0.514	768.1	1126.9	358.8	1042.6	115.09	768	1100	0.24	0.466926	1495.42	-98.1752	4.69e-05	1.10638	23.56	16.08	3.74	1078.1	1125
1097	09_Kw17_Yg17	19	N	2	3	23	1	0	2	239	51	F	English	Y	mice	240	NA	Y	36	29		43	47	90	0.511905	0.575758	0.487179	RKw17	RYg17	RKw17_2249.wav	0.514	768.1	1126.9	358.8	1042.6	115.09	768	1100	0.24	0.466926	1495.42	-98.1752	4.69e-05	1.10638	23.56	16.08	3.74	1078.1	1125
1098	09_Kw17_Yg17	98	N	2	4	41	1	1	1	343	18	F	English	N			NA	Y	36	39		37	48	85	0.690476	0.393939	0.538462	RKw17	RYg17	RKw17_2249.wav	0.514	768.1	1126.9	358.8	1042.6	115.09	768	1100	0.24	0.466926	1495.42	-98.1752	4.69e-05	1.10638	23.56	16.08	3.74	1078.1	1125
1099	09_Kw17_Yg17	78	N	2	2	19	1	1	1	3027	20	M	Spanish	Y	dogs, snakes	2	NA	Y	45	35		NA	NA	NA	0.547619	0.424242	0.487179	RKw17	RYg17	RKw17_2249.wav	0.514	768.1	1126.9	358.8	1042.6	115.09	768	1100	0.24	0.466926	1495.42	-98.1752	4.69e-05	1.10638	23.56	16.08	3.74	1078.1	1125
1100	09_Kw17_Yg17	510	Y	2	1	30	1	0	2	3948	30	M	English	Y	Rhesus macaque, Sooty mangabey	60	60	Y	NA	NA	asked for more clarification on "intense emotion" ~3 min into task	NA	NA	NA	0.511905	0.727273	0.717949	RKw17	RYg17	RKw17_2249.wav	0.514	768.1	1126.9	358.8	1042.6	115.09	768	1100	0.24	0.466926	1495.42	-98.1752	4.69e-05	1.10638	23.56	16.08	3.74	1078.1	1125
1101	09_Kw17_Yg17	92	N	2	2	32	1	1	1	384	18	F	English	N			NA	Y	45	30		36	36	72	0.595238	0.212121	0.589744	RKw17	RYg17	RKw17_2249.wav	0.514	768.1	1126.9	358.8	1042.6	115.09	768	1100	0.24	0.466926	1495.42	-98.1752	4.69e-05	1.10638	23.56	16.08	3.74	1078.1	1125
1102	09_Kw17_Yg17	112	N	2	2	35	1	0	2	476	18	M	Turkish	N			NA	Y	55	40		NA	NA	NA	0.535714	0.424242	0.461538	RKw17	RYg17	RKw17_2249.wav	0.514	768.1	1126.9	358.8	1042.6	115.09	768	1100	0.24	0.466926	1495.42	-98.1752	4.69e-05	1.10638	23.56	16.08	3.74	1078.1	1125
1103	09_Kw17_Yg17	4	N	2	3	10	1	0	2	311	20	M	English	N			NA	N	43	38		27	24	51	0.559524	0.424242	0.589744	RKw17	RYg17	RKw17_2249.wav	0.514	768.1	1126.9	358.8	1042.6	115.09	768	1100	0.24	0.466926	1495.42	-98.1752	4.69e-05	1.10638	23.56	16.08	3.74	1078.1	1125
1104	09_Kw17_Yg17	56	N	2	2	8	1	0	2	984	18	F	Chinese	N			NA	Y	31	30		NA	NA	NA	0.595238	0.575758	0.384615	RKw17	RYg17	RKw17_2249.wav	0.514	768.1	1126.9	358.8	1042.6	115.09	768	1100	0.24	0.466926	1495.42	-98.1752	4.69e-05	1.10638	23.56	16.08	3.74	1078.1	1125
1105	09_Kw17_Yg17	99	N	2	1	32	1	0	2	217	19	F	English + Hindi	N			NA	Y	56	37		37	39	76	0.595238	0.30303	0.461538	RKw17	RYg17	RKw17_2249.wav	0.514	768.1	1126.9	358.8	1042.6	115.09	768	1100	0.24	0.466926	1495.42	-98.1752	4.69e-05	1.10638	23.56	16.08	3.74	1078.1	1125
1106	09_Kw17_Yg17	8	N	2	1	24	1	1	1	392	19	F	English	Y	dogs, cats	24	NA	Y	58	40		39	43	82	0.595238	0.363636	0.589744	RKw17	RYg17	RKw17_2249.wav	0.514	768.1	1126.9	358.8	1042.6	115.09	768	1100	0.24	0.466926	1495.42	-98.1752	4.69e-05	1.10638	23.56	16.08	3.74	1078.1	1125
1107	09_Kw17_Yg17	511	Y	2	1	38	1	0	2	233	24	F	English	Y	Rhesus macaque, domestic cats	24	24	Y	NA	NA		NA	NA	NA	0.571429	0.69697	0.512821	RKw17	RYg17	RKw17_2249.wav	0.514	768.1	1126.9	358.8	1042.6	115.09	768	1100	0.24	0.466926	1495.42	-98.1752	4.69e-05	1.10638	23.56	16.08	3.74	1078.1	1125
1108	09_Kw17_Yg17	86	N	2	1	31	1	0	2	269	22	M	Chinese	N			NA	Y	44	35		NA	NA	NA	0.666667	0.515152	0.641026	RKw17	RYg17	RKw17_2249.wav	0.514	768.1	1126.9	358.8	1042.6	115.09	768	1100	0.24	0.466926	1495.42	-98.1752	4.69e-05	1.10638	23.56	16.08	3.74	1078.1	1125
1109	09_Kw17_Yg17	52	N	2	2	16	1	0	2	174	19	F	English	N			NA	Y	55	38		42	43	85	0.619048	0.393939	0.512821	RKw17	RYg17	RKw17_2249.wav	0.514	768.1	1126.9	358.8	1042.6	115.09	768	1100	0.24	0.466926	1495.42	-98.1752	4.69e-05	1.10638	23.56	16.08	3.74	1078.1	1125
1110	09_Kw17_Yg17	94	N	2	2	1	1	1	1	86	20	F	English	N			NA	Y	45	44		40	44	84	0.72619	0.878788	0.410256	RKw17	RYg17	RKw17_2249.wav	0.514	768.1	1126.9	358.8	1042.6	115.09	768	1100	0.24	0.466926	1495.42	-98.1752	4.69e-05	1.10638	23.56	16.08	3.74	1078.1	1125
1111	09_Kw17_Yg17	97	N	2	4	32	1	0	2	1093	19	F	English	N			NA	Y	48	28		40	43	83	0.595238	0.606061	0.487179	RKw17	RYg17	RKw17_2249.wav	0.514	768.1	1126.9	358.8	1042.6	115.09	768	1100	0.24	0.466926	1495.42	-98.1752	4.69e-05	1.10638	23.56	16.08	3.74	1078.1	1125
1112	09_Kw17_Yg17	6	N	2	1	33	1	1	1	463	23	M	English	Y	mice	3	NA	Y	31	28		38	41	79	0.595238	0.484848	0.589744	RKw17	RYg17	RKw17_2249.wav	0.514	768.1	1126.9	358.8	1042.6	115.09	768	1100	0.24	0.466926	1495.42	-98.1752	4.69e-05	1.10638	23.56	16.08	3.74	1078.1	1125
1113	09_Kw17_Yg17	16	N	2	1	36	1	1	1	577	21	F	English	Y	dogs, cats	6	NA	Y	44	43		38	40	78	0.559524	0.545455	0.461538	RKw17	RYg17	RKw17_2249.wav	0.514	768.1	1126.9	358.8	1042.6	115.09	768	1100	0.24	0.466926	1495.42	-98.1752	4.69e-05	1.10638	23.56	16.08	3.74	1078.1	1125
1114	09_Kw17_Yg17	38	N	2	4	17	1	1	1	1478	18	F	English	N			NA	Y	57	36		41	41	82	0.619048	0.606061	0.615385	RKw17	RYg17	RKw17_2249.wav	0.514	768.1	1126.9	358.8	1042.6	115.09	768	1100	0.24	0.466926	1495.42	-98.1752	4.69e-05	1.10638	23.56	16.08	3.74	1078.1	1125
1115	09_Kw17_Yg17	509	Y	2	1	18	1	0	2	686	28	M	Spanish/English	Y	Rhesus macaque, mangabey	48	48	Y	NA	NA		NA	NA	NA	0.464286	0.969697	0.615385	RKw17	RYg17	RKw17_2249.wav	0.514	768.1	1126.9	358.8	1042.6	115.09	768	1100	0.24	0.466926	1495.42	-98.1752	4.69e-05	1.10638	23.56	16.08	3.74	1078.1	1125
1116	09_Kw17_Yg17	21	N	2	1	16	1	1	1	182	20	F	English	Y	dogs	6	NA	Y	44	37		41	34	75	0.630952	0.787879	0.384615	RKw17	RYg17	RKw17_2249.wav	0.514	768.1	1126.9	358.8	1042.6	115.09	768	1100	0.24	0.466926	1495.42	-98.1752	4.69e-05	1.10638	23.56	16.08	3.74	1078.1	1125
1117	09_Kw17_Yg17	64	N	2	4	16	1	1	1	682	18	F	English	N			NA	N	55	36		40	42	82	0.654762	0.393939	0.666667	RKw17	RYg17	RKw17_2249.wav	0.514	768.1	1126.9	358.8	1042.6	115.09	768	1100	0.24	0.466926	1495.42	-98.1752	4.69e-05	1.10638	23.56	16.08	3.74	1078.1	1125
1118	09_Kw17_Yg17	28	N	2	2	5	1	0	2	107	40	F	English	N			NA	Y	50	33		42	NA	NA	0.630952	0.606061	0.564103	RKw17	RYg17	RKw17_2249.wav	0.514	768.1	1126.9	358.8	1042.6	115.09	768	1100	0.24	0.466926	1495.42	-98.1752	4.69e-05	1.10638	23.56	16.08	3.74	1078.1	1125
1119	09_Kw17_Yg17	13	N	2	4	41	1	0	2	1084	19	F	English	N			NA	N	21	34		42	41	83	0.5	0.666667	0.487179	RKw17	RYg17	RKw17_2249.wav	0.514	768.1	1126.9	358.8	1042.6	115.09	768	1100	0.24	0.466926	1495.42	-98.1752	4.69e-05	1.10638	23.56	16.08	3.74	1078.1	1125
1120	09_Kw17_Yg17	27	N	2	4	19	1	0	2	700	23	F	Telugu	N			NA	N	32	44		NA	NA	NA	0.547619	0.151515	0.512821	RKw17	RYg17	RKw17_2249.wav	0.514	768.1	1126.9	358.8	1042.6	115.09	768	1100	0.24	0.466926	1495.42	-98.1752	4.69e-05	1.10638	23.56	16.08	3.74	1078.1	1125
1121	09_Kw17_Yg17	91	N	2	1	26	1	1	1	159	20	F	Chinese	N			NA	N	49	36		NA	NA	NA	0.547619	0.606061	0.641026	RKw17	RYg17	RKw17_2249.wav	0.514	768.1	1126.9	358.8	1042.6	115.09	768	1100	0.24	0.466926	1495.42	-98.1752	4.69e-05	1.10638	23.56	16.08	3.74	1078.1	1125
1122	09_Kw17_Yg17	54	N	2	1	17	1	0	2	293	18	F	Chinese	N			NA	N	35	41		NA	NA	NA	0.535714	0.424242	0.538462	RKw17	RYg17	RKw17_2249.wav	0.514	768.1	1126.9	358.8	1042.6	115.09	768	1100	0.24	0.466926	1495.42	-98.1752	4.69e-05	1.10638	23.56	16.08	3.74	1078.1	1125
1123	09_Kw17_Yg17	62	N	2	4	24	1	0	2	254	18	F	English	Y	mice	1	NA	Y	59	32		46	40	86	0.559524	0.484848	0.538462	RKw17	RYg17	RKw17_2249.wav	0.514	768.1	1126.9	358.8	1042.6	115.09	768	1100	0.24	0.466926	1495.42	-98.1752	4.69e-05	1.10638	23.56	16.08	3.74	1078.1	1125
1124	09_Kw17_Yg17	90	N	2	3	20	1	0	2	734	21	M	English	N			NA	N	43	24		42	42	84	0.52381	0.69697	0.641026	RKw17	RYg17	RKw17_2249.wav	0.514	768.1	1126.9	358.8	1042.6	115.09	768	1100	0.24	0.466926	1495.42	-98.1752	4.69e-05	1.10638	23.56	16.08	3.74	1078.1	1125
1125	09_Kw17_Yg17	43	N	2	3	35	1	0	2	191	19	M	English	N			NA	Y	37	39		36	40	76	0.595238	0.666667	0.589744	RKw17	RYg17	RKw17_2249.wav	0.514	768.1	1126.9	358.8	1042.6	115.09	768	1100	0.24	0.466926	1495.42	-98.1752	4.69e-05	1.10638	23.56	16.08	3.74	1078.1	1125
1126	10_Av17_Mc18	30	N	2	1	15	2	1	2	3513	19	F	Chinese	N			NA	N	43	31		NA	NA	NA	0.535714	0.151515	0.641026	RMc18	RAv17	RAv17_2308.wav	0.648	853	1089.6	236.6	1007.8	73.78	852	1046	0.25	0.385802	950.4	-109.548	3.96e-05	1.24662	41.51	14.8	4.4	1031.2	1031.2
1127	10_Av17_Mc18	83	N	2	3	35	2	1	2	231	19	F	English	N			NA	Y	55	46		48	46	94	0.5	0.333333	0.487179	RMc18	RAv17	RAv17_2308.wav	0.648	853	1089.6	236.6	1007.8	73.78	852	1046	0.25	0.385802	950.4	-109.548	3.96e-05	1.24662	41.51	14.8	4.4	1031.2	1031.2
1128	10_Av17_Mc18	43	N	2	3	14	2	1	2	749	19	M	English	N			NA	Y	37	39		36	40	76	0.595238	0.666667	0.589744	RMc18	RAv17	RAv17_2308.wav	0.648	853	1089.6	236.6	1007.8	73.78	852	1046	0.25	0.385802	950.4	-109.548	3.96e-05	1.24662	41.51	14.8	4.4	1031.2	1031.2
1129	10_Av17_Mc18	26	N	2	1	27	2	1	2	251	24	M	Telugu	N			NA	N	41	35		NA	NA	NA	0.607143	0.515152	0.538462	RMc18	RAv17	RAv17_2308.wav	0.648	853	1089.6	236.6	1007.8	73.78	852	1046	0.25	0.385802	950.4	-109.548	3.96e-05	1.24662	41.51	14.8	4.4	1031.2	1031.2
1130	10_Av17_Mc18	15	N	2	4	8	2	1	2	568	20	F	English and Chinese	N			NA	Y	58	36	didn't make it to face - just voice	NA	36	NA	0.488095	0.393939	0.461538	RMc18	RAv17	RAv17_2308.wav	0.648	853	1089.6	236.6	1007.8	73.78	852	1046	0.25	0.385802	950.4	-109.548	3.96e-05	1.24662	41.51	14.8	4.4	1031.2	1031.2
1131	10_Av17_Mc18	93	N	2	1	4	2	1	2	701	19	F	English	N			NA	Y	53	37		38	38	76	0.52381	0.30303	0.487179	RMc18	RAv17	RAv17_2308.wav	0.648	853	1089.6	236.6	1007.8	73.78	852	1046	0.25	0.385802	950.4	-109.548	3.96e-05	1.24662	41.51	14.8	4.4	1031.2	1031.2
1132	10_Av17_Mc18	35	N	2	1	27	2	1	2	703	19	M	English	N			NA	N	40	21		44	39	83	0.666667	0.818182	0.641026	RMc18	RAv17	RAv17_2308.wav	0.648	853	1089.6	236.6	1007.8	73.78	852	1046	0.25	0.385802	950.4	-109.548	3.96e-05	1.24662	41.51	14.8	4.4	1031.2	1031.2
1133	10_Av17_Mc18	105	N	2	2	22	2	0	1	256	19	F	English	N			NA	Y	44	36		40	42	82	0.571429	0.606061	0.435897	RMc18	RAv17	RAv17_2308.wav	0.648	853	1089.6	236.6	1007.8	73.78	852	1046	0.25	0.385802	950.4	-109.548	3.96e-05	1.24662	41.51	14.8	4.4	1031.2	1031.2
1134	10_Av17_Mc18	31	N	2	4	37	2	1	2	422	18	F	English	N			NA	Y	47	35		38	40	78	0.583333	0.575758	0.384615	RMc18	RAv17	RAv17_2308.wav	0.648	853	1089.6	236.6	1007.8	73.78	852	1046	0.25	0.385802	950.4	-109.548	3.96e-05	1.24662	41.51	14.8	4.4	1031.2	1031.2
1135	10_Av17_Mc18	107	N	2	4	28	2	1	2	515	22	F	Chinese	N			NA	N	21	37		NA	NA	NA	0.595238	0.424242	0.435897	RMc18	RAv17	RAv17_2308.wav	0.648	853	1089.6	236.6	1007.8	73.78	852	1046	0.25	0.385802	950.4	-109.548	3.96e-05	1.24662	41.51	14.8	4.4	1031.2	1031.2
1136	10_Av17_Mc18	114	N	2	1	31	2	1	2	659	19	M	English	N			NA	Y	58	35		36	38	74	0.607143	0.393939	0.512821	RMc18	RAv17	RAv17_2308.wav	0.648	853	1089.6	236.6	1007.8	73.78	852	1046	0.25	0.385802	950.4	-109.548	3.96e-05	1.24662	41.51	14.8	4.4	1031.2	1031.2
1137	10_Av17_Mc18	80	N	2	4	16	2	1	2	764	18	F	English	N			NA	Y	57	34		36	3	39	0.607143	0.545455	0.358974	RMc18	RAv17	RAv17_2308.wav	0.648	853	1089.6	236.6	1007.8	73.78	852	1046	0.25	0.385802	950.4	-109.548	3.96e-05	1.24662	41.51	14.8	4.4	1031.2	1031.2
1138	10_Av17_Mc18	54	N	2	1	14	2	1	2	203	18	F	Chinese	N			NA	N	35	41		NA	NA	NA	0.535714	0.424242	0.538462	RMc18	RAv17	RAv17_2308.wav	0.648	853	1089.6	236.6	1007.8	73.78	852	1046	0.25	0.385802	950.4	-109.548	3.96e-05	1.24662	41.51	14.8	4.4	1031.2	1031.2
1139	10_Av17_Mc18	509	Y	2	1	22	2	1	2	348	28	M	Spanish/English	Y	Rhesus macaque, mangabey	48	48	Y	NA	NA		NA	NA	NA	0.464286	0.969697	0.615385	RMc18	RAv17	RAv17_2308.wav	0.648	853	1089.6	236.6	1007.8	73.78	852	1046	0.25	0.385802	950.4	-109.548	3.96e-05	1.24662	41.51	14.8	4.4	1031.2	1031.2
1140	10_Av17_Mc18	2	N	2	3	16	2	1	2	446	19	F	English	N			NA	Y	49	42		36	37	73	0.595238	0.0606061	0.641026	RMc18	RAv17	RAv17_2308.wav	0.648	853	1089.6	236.6	1007.8	73.78	852	1046	0.25	0.385802	950.4	-109.548	3.96e-05	1.24662	41.51	14.8	4.4	1031.2	1031.2
1141	10_Av17_Mc18	501	Y	2	4	39	2	1	2	99	26	M	English	Y	lemurs (black white ruffed, ringtail, red bellied, crown, mongoose), Rhesus monkeys, gorillas, orangutans	Lemur: 24, Rh: 48, Gorilla: 12, Orangutan: 12	48	Y	47	37		46	44	90	0.559524	0.69697	0.461538	RMc18	RAv17	RAv17_2308.wav	0.648	853	1089.6	236.6	1007.8	73.78	852	1046	0.25	0.385802	950.4	-109.548	3.96e-05	1.24662	41.51	14.8	4.4	1031.2	1031.2
1142	10_Av17_Mc18	47	N	2	3	6	2	1	2	233	18	F	English	N			NA	Y	60	42		42	45	87	0.47619	0.30303	0.333333	RMc18	RAv17	RAv17_2308.wav	0.648	853	1089.6	236.6	1007.8	73.78	852	1046	0.25	0.385802	950.4	-109.548	3.96e-05	1.24662	41.51	14.8	4.4	1031.2	1031.2
1143	10_Av17_Mc18	10	N	2	3	38	2	1	2	280	21	F	English	N			NA	Y	50	38		36	38	74	0.559524	0.757576	0.358974	RMc18	RAv17	RAv17_2308.wav	0.648	853	1089.6	236.6	1007.8	73.78	852	1046	0.25	0.385802	950.4	-109.548	3.96e-05	1.24662	41.51	14.8	4.4	1031.2	1031.2
1144	10_Av17_Mc18	57	N	2	4	20	2	1	2	327	20	F	English	N			NA	N	29	31		27	41	68	0.547619	0.333333	0.538462	RMc18	RAv17	RAv17_2308.wav	0.648	853	1089.6	236.6	1007.8	73.78	852	1046	0.25	0.385802	950.4	-109.548	3.96e-05	1.24662	41.51	14.8	4.4	1031.2	1031.2
1145	10_Av17_Mc18	96	N	2	1	22	2	1	2	218	18	F	English	N			NA	Y	59	39		44	47	91	0.583333	0.727273	0.512821	RMc18	RAv17	RAv17_2308.wav	0.648	853	1089.6	236.6	1007.8	73.78	852	1046	0.25	0.385802	950.4	-109.548	3.96e-05	1.24662	41.51	14.8	4.4	1031.2	1031.2
1146	10_Av17_Mc18	50	N	2	4	7	2	0	1	348	19	F	English	Y	dogs, cats	12	NA	Y	53	40		24	19	43	0.5	0.212121	0.512821	RMc18	RAv17	RAv17_2308.wav	0.648	853	1089.6	236.6	1007.8	73.78	852	1046	0.25	0.385802	950.4	-109.548	3.96e-05	1.24662	41.51	14.8	4.4	1031.2	1031.2
1147	10_Av17_Mc18	51	N	2	1	33	2	1	2	1663	18	F	English	N			NA	Y	31	36		45	44	89	0.654762	0.515152	0.615385	RMc18	RAv17	RAv17_2308.wav	0.648	853	1089.6	236.6	1007.8	73.78	852	1046	0.25	0.385802	950.4	-109.548	3.96e-05	1.24662	41.51	14.8	4.4	1031.2	1031.2
1148	10_Av17_Mc18	66	N	2	2	2	2	1	2	1453	20	M	Chinese	N			NA	N	41	38		NA	NA	NA	0.47619	0.69697	0.512821	RMc18	RAv17	RAv17_2308.wav	0.648	853	1089.6	236.6	1007.8	73.78	852	1046	0.25	0.385802	950.4	-109.548	3.96e-05	1.24662	41.51	14.8	4.4	1031.2	1031.2
1149	10_Av17_Mc18	40	N	2	2	20	2	1	2	287	19	F	Chinese	N			NA	N	39	39		NA	NA	NA	0.666667	0.515152	0.512821	RMc18	RAv17	RAv17_2308.wav	0.648	853	1089.6	236.6	1007.8	73.78	852	1046	0.25	0.385802	950.4	-109.548	3.96e-05	1.24662	41.51	14.8	4.4	1031.2	1031.2
1150	10_Av17_Mc18	106	N	2	4	6	2	1	2	2939	18	F	Korean	N			NA	Y	53	39		NA	NA	NA	0.607143	0.606061	0.461538	RMc18	RAv17	RAv17_2308.wav	0.648	853	1089.6	236.6	1007.8	73.78	852	1046	0.25	0.385802	950.4	-109.548	3.96e-05	1.24662	41.51	14.8	4.4	1031.2	1031.2
1151	10_Av17_Mc18	63	N	2	4	13	2	1	2	198	19	F	English	N			NA	N	60	40		44	42	86	0.535714	0	0.717949	RMc18	RAv17	RAv17_2308.wav	0.648	853	1089.6	236.6	1007.8	73.78	852	1046	0.25	0.385802	950.4	-109.548	3.96e-05	1.24662	41.51	14.8	4.4	1031.2	1031.2
1152	10_Av17_Mc18	13	N	2	4	1	2	1	2	415	19	F	English	N			NA	N	21	34		42	41	83	0.5	0.666667	0.487179	RMc18	RAv17	RAv17_2308.wav	0.648	853	1089.6	236.6	1007.8	73.78	852	1046	0.25	0.385802	950.4	-109.548	3.96e-05	1.24662	41.51	14.8	4.4	1031.2	1031.2
1153	10_Av17_Mc18	507	Y	2	1	1	2	1	2	535	27	F	English	Y	Rhesus macaque, tufted capuchins	60	48	Y	NA	NA		NA	NA	NA	0.547619	1	0.666667	RMc18	RAv17	RAv17_2308.wav	0.648	853	1089.6	236.6	1007.8	73.78	852	1046	0.25	0.385802	950.4	-109.548	3.96e-05	1.24662	41.51	14.8	4.4	1031.2	1031.2
1154	10_Av17_Mc18	67	N	2	3	32	2	1	2	114	18	F	English	N			NA	N	29	44		32	32	64	0.75	0.636364	0.564103	RMc18	RAv17	RAv17_2308.wav	0.648	853	1089.6	236.6	1007.8	73.78	852	1046	0.25	0.385802	950.4	-109.548	3.96e-05	1.24662	41.51	14.8	4.4	1031.2	1031.2
1155	10_Av17_Mc18	33	N	2	2	9	2	1	2	194	19	F	Mandarin + English	N			NA	Y	56	33		NA	NA	NA	0.571429	0.272727	0.615385	RMc18	RAv17	RAv17_2308.wav	0.648	853	1089.6	236.6	1007.8	73.78	852	1046	0.25	0.385802	950.4	-109.548	3.96e-05	1.24662	41.51	14.8	4.4	1031.2	1031.2
1156	10_Av17_Mc18	6	N	2	1	39	2	1	2	386	23	M	English	Y	mice	3	NA	Y	31	28		38	41	79	0.595238	0.484848	0.589744	RMc18	RAv17	RAv17_2308.wav	0.648	853	1089.6	236.6	1007.8	73.78	852	1046	0.25	0.385802	950.4	-109.548	3.96e-05	1.24662	41.51	14.8	4.4	1031.2	1031.2
1157	10_Av17_Mc18	97	N	2	4	34	2	1	2	314	19	F	English	N			NA	Y	48	28		40	43	83	0.595238	0.606061	0.487179	RMc18	RAv17	RAv17_2308.wav	0.648	853	1089.6	236.6	1007.8	73.78	852	1046	0.25	0.385802	950.4	-109.548	3.96e-05	1.24662	41.51	14.8	4.4	1031.2	1031.2
1158	10_Av17_Mc18	11	N	2	4	39	2	1	2	261	20	F	English (mainly) + Hindi	Y	dogs	6	NA	Y	66	45	noted w/ regard to coos that it is upsetting - sounds like they're in pain. Noted surpirse that screams would be more intense context than coos	34	41	75	0.666667	0.545455	0.641026	RMc18	RAv17	RAv17_2308.wav	0.648	853	1089.6	236.6	1007.8	73.78	852	1046	0.25	0.385802	950.4	-109.548	3.96e-05	1.24662	41.51	14.8	4.4	1031.2	1031.2
1159	10_Av17_Mc18	88	N	2	1	28	2	1	2	188	19	M	Mandarin	N			NA	Y	49	27		NA	NA	NA	0.547619	0.818182	0.538462	RMc18	RAv17	RAv17_2308.wav	0.648	853	1089.6	236.6	1007.8	73.78	852	1046	0.25	0.385802	950.4	-109.548	3.96e-05	1.24662	41.51	14.8	4.4	1031.2	1031.2
1160	10_Av17_Mc18	32	N	2	1	31	2	1	2	408	23	F	English	N			NA	N	58	26		34	33	67	0.559524	0.424242	0.435897	RMc18	RAv17	RAv17_2308.wav	0.648	853	1089.6	236.6	1007.8	73.78	852	1046	0.25	0.385802	950.4	-109.548	3.96e-05	1.24662	41.51	14.8	4.4	1031.2	1031.2
1161	10_Av17_Mc18	18	N	2	2	34	2	1	2	511	20	F	English	N			NA	Y	44	35		32	42	74	0.571429	0.151515	0.333333	RMc18	RAv17	RAv17_2308.wav	0.648	853	1089.6	236.6	1007.8	73.78	852	1046	0.25	0.385802	950.4	-109.548	3.96e-05	1.24662	41.51	14.8	4.4	1031.2	1031.2
1162	10_Av17_Mc18	102	N	2	1	28	2	0	1	529	18	F	English	Y	elephants, dogs, tortoises	3	NA	Y	46	44		33	36	69	0.559524	0.424242	0.461538	RMc18	RAv17	RAv17_2308.wav	0.648	853	1089.6	236.6	1007.8	73.78	852	1046	0.25	0.385802	950.4	-109.548	3.96e-05	1.24662	41.51	14.8	4.4	1031.2	1031.2
1163	10_Av17_Mc18	111	N	2	3	2	2	1	2	245	21	F	English	N			NA	N	39	39		40	36	76	0.511905	0.575758	0.512821	RMc18	RAv17	RAv17_2308.wav	0.648	853	1089.6	236.6	1007.8	73.78	852	1046	0.25	0.385802	950.4	-109.548	3.96e-05	1.24662	41.51	14.8	4.4	1031.2	1031.2
1164	10_Av17_Mc18	58	N	2	1	41	2	1	2	350	21	F	Spanish	Y	mice, rats	2	NA	Y	53	33		NA	NA	NA	0.547619	0.515152	0.461538	RMc18	RAv17	RAv17_2308.wav	0.648	853	1089.6	236.6	1007.8	73.78	852	1046	0.25	0.385802	950.4	-109.548	3.96e-05	1.24662	41.51	14.8	4.4	1031.2	1031.2
1165	10_Av17_Mc18	4	N	2	3	39	2	1	2	196	20	M	English	N			NA	N	43	38		27	24	51	0.559524	0.424242	0.589744	RMc18	RAv17	RAv17_2308.wav	0.648	853	1089.6	236.6	1007.8	73.78	852	1046	0.25	0.385802	950.4	-109.548	3.96e-05	1.24662	41.51	14.8	4.4	1031.2	1031.2
1166	10_Av17_Mc18	108	N	2	2	13	2	1	2	204	19	M	English	N			NA	N	59	24		45	43	88	0.571429	0.393939	0.435897	RMc18	RAv17	RAv17_2308.wav	0.648	853	1089.6	236.6	1007.8	73.78	852	1046	0.25	0.385802	950.4	-109.548	3.96e-05	1.24662	41.51	14.8	4.4	1031.2	1031.2
1167	10_Av17_Mc18	506	Y	2	2	22	2	1	2	1222	37	F	English	Y	Rhesus macaque	120	120	Y	NA	NA		NA	NA	NA	0.559524	0.424242	0.487179	RMc18	RAv17	RAv17_2308.wav	0.648	853	1089.6	236.6	1007.8	73.78	852	1046	0.25	0.385802	950.4	-109.548	3.96e-05	1.24662	41.51	14.8	4.4	1031.2	1031.2
1168	10_Av17_Mc18	115	N	2	4	23	2	1	2	951	18	M	Mandarin	N			NA	N	31	37		NA	NA	NA	0.583333	0.575758	0.461538	RMc18	RAv17	RAv17_2308.wav	0.648	853	1089.6	236.6	1007.8	73.78	852	1046	0.25	0.385802	950.4	-109.548	3.96e-05	1.24662	41.51	14.8	4.4	1031.2	1031.2
1169	10_Av17_Mc18	46	N	2	3	1	2	1	2	275	18	F	English	N			NA	Y	45	25		39	42	81	0.619048	0.515152	0.589744	RMc18	RAv17	RAv17_2308.wav	0.648	853	1089.6	236.6	1007.8	73.78	852	1046	0.25	0.385802	950.4	-109.548	3.96e-05	1.24662	41.51	14.8	4.4	1031.2	1031.2
1170	10_Av17_Mc18	90	N	2	3	35	2	1	2	461	21	M	English	N			NA	N	43	24		42	42	84	0.52381	0.69697	0.641026	RMc18	RAv17	RAv17_2308.wav	0.648	853	1089.6	236.6	1007.8	73.78	852	1046	0.25	0.385802	950.4	-109.548	3.96e-05	1.24662	41.51	14.8	4.4	1031.2	1031.2
1171	10_Av17_Mc18	7	N	2	1	35	2	1	2	253	21	F	English	N			NA	Y	49	33		44	43	87	0.583333	0.363636	0.615385	RMc18	RAv17	RAv17_2308.wav	0.648	853	1089.6	236.6	1007.8	73.78	852	1046	0.25	0.385802	950.4	-109.548	3.96e-05	1.24662	41.51	14.8	4.4	1031.2	1031.2
1172	10_Av17_Mc18	64	N	2	4	32	2	1	2	226	18	F	English	N			NA	N	55	36		40	42	82	0.654762	0.393939	0.666667	RMc18	RAv17	RAv17_2308.wav	0.648	853	1089.6	236.6	1007.8	73.78	852	1046	0.25	0.385802	950.4	-109.548	3.96e-05	1.24662	41.51	14.8	4.4	1031.2	1031.2
1173	10_Av17_Mc18	37	N	2	2	29	2	1	2	283	19	F	Spanish	N			NA	Y	44	32		NA	NA	NA	0.52381	0.606061	0.641026	RMc18	RAv17	RAv17_2308.wav	0.648	853	1089.6	236.6	1007.8	73.78	852	1046	0.25	0.385802	950.4	-109.548	3.96e-05	1.24662	41.51	14.8	4.4	1031.2	1031.2
1174	10_Av17_Mc18	79	N	2	1	28	2	1	2	161	21	M	English	N			NA	Y	55	38		33	34	67	0.571429	0.393939	0.564103	RMc18	RAv17	RAv17_2308.wav	0.648	853	1089.6	236.6	1007.8	73.78	852	1046	0.25	0.385802	950.4	-109.548	3.96e-05	1.24662	41.51	14.8	4.4	1031.2	1031.2
1175	10_Av17_Mc18	112	N	2	2	10	2	0	1	272	18	M	Turkish	N			NA	Y	55	40		NA	NA	NA	0.535714	0.424242	0.461538	RMc18	RAv17	RAv17_2308.wav	0.648	853	1089.6	236.6	1007.8	73.78	852	1046	0.25	0.385802	950.4	-109.548	3.96e-05	1.24662	41.51	14.8	4.4	1031.2	1031.2
1176	10_Av17_Mc18	512	Y	2	2	12	2	1	2	205	39	M	English	Y	Rhesus macaque, pigtail macaque, common chimpanzee, west lowland gorilla, Sooty mangabey	144	144	Y	NA	NA	occasionally needed to answer radio during task	NA	NA	NA	0.642857	1	0.589744	RMc18	RAv17	RAv17_2308.wav	0.648	853	1089.6	236.6	1007.8	73.78	852	1046	0.25	0.385802	950.4	-109.548	3.96e-05	1.24662	41.51	14.8	4.4	1031.2	1031.2
1177	10_Av17_Mc18	101	N	2	4	6	2	1	2	244	19	F	English	Y	mice	11	NA	Y	50	40		43	43	86	0.690476	0.484848	0.487179	RMc18	RAv17	RAv17_2308.wav	0.648	853	1089.6	236.6	1007.8	73.78	852	1046	0.25	0.385802	950.4	-109.548	3.96e-05	1.24662	41.51	14.8	4.4	1031.2	1031.2
1178	10_Av17_Mc18	95	N	2	2	24	2	1	2	301	20	F	English	N			NA	Y	57	30		39	44	83	0.571429	0.363636	0.564103	RMc18	RAv17	RAv17_2308.wav	0.648	853	1089.6	236.6	1007.8	73.78	852	1046	0.25	0.385802	950.4	-109.548	3.96e-05	1.24662	41.51	14.8	4.4	1031.2	1031.2
1179	10_Av17_Mc18	53	N	2	1	33	2	1	2	165	18	F	English	N			NA	N	71	47		22	17	39	0.642857	0.787879	0.641026	RMc18	RAv17	RAv17_2308.wav	0.648	853	1089.6	236.6	1007.8	73.78	852	1046	0.25	0.385802	950.4	-109.548	3.96e-05	1.24662	41.51	14.8	4.4	1031.2	1031.2
1180	10_Av17_Mc18	36	N	2	3	39	2	0	1	653	19	F	English	Y	dogs, cats	4	NA	Y	53	31		42	42	84	0.416667	0.606061	0.435897	RMc18	RAv17	RAv17_2308.wav	0.648	853	1089.6	236.6	1007.8	73.78	852	1046	0.25	0.385802	950.4	-109.548	3.96e-05	1.24662	41.51	14.8	4.4	1031.2	1031.2
1181	10_Av17_Mc18	29	N	2	1	20	2	1	2	87	19	F	English	Y	dogs, cats	3	NA	Y	63	44		47	41	88	0.547619	0.454545	0.512821	RMc18	RAv17	RAv17_2308.wav	0.648	853	1089.6	236.6	1007.8	73.78	852	1046	0.25	0.385802	950.4	-109.548	3.96e-05	1.24662	41.51	14.8	4.4	1031.2	1031.2
1182	10_Av17_Mc18	19	N	2	3	11	2	1	2	267	51	F	English	Y	mice	240	NA	Y	36	29		43	47	90	0.511905	0.575758	0.487179	RMc18	RAv17	RAv17_2308.wav	0.648	853	1089.6	236.6	1007.8	73.78	852	1046	0.25	0.385802	950.4	-109.548	3.96e-05	1.24662	41.51	14.8	4.4	1031.2	1031.2
1183	10_Av17_Mc18	70	N	2	3	26	2	1	2	77	18	F	English	N			NA	Y	62	34		48	45	93	0.52381	0.242424	0.384615	RMc18	RAv17	RAv17_2308.wav	0.648	853	1089.6	236.6	1007.8	73.78	852	1046	0.25	0.385802	950.4	-109.548	3.96e-05	1.24662	41.51	14.8	4.4	1031.2	1031.2
1184	10_Av17_Mc18	5	N	2	3	15	2	1	2	226	29	F	English	Y	cat, dog, horse, cow	6+ years	NA	Y	41	35		46	49	95	0.583333	0.393939	0.564103	RMc18	RAv17	RAv17_2308.wav	0.648	853	1089.6	236.6	1007.8	73.78	852	1046	0.25	0.385802	950.4	-109.548	3.96e-05	1.24662	41.51	14.8	4.4	1031.2	1031.2
1185	10_Av17_Mc18	511	Y	2	1	24	2	1	2	116	24	F	English	Y	Rhesus macaque, domestic cats	24	24	Y	NA	NA		NA	NA	NA	0.571429	0.69697	0.512821	RMc18	RAv17	RAv17_2308.wav	0.648	853	1089.6	236.6	1007.8	73.78	852	1046	0.25	0.385802	950.4	-109.548	3.96e-05	1.24662	41.51	14.8	4.4	1031.2	1031.2
1186	10_Av17_Mc18	75	N	2	2	12	2	1	2	263	19	M	Chinese	Y	fruitfly, termites	1.5	NA	N	58	38		NA	NA	NA	0.547619	0.484848	0.461538	RMc18	RAv17	RAv17_2308.wav	0.648	853	1089.6	236.6	1007.8	73.78	852	1046	0.25	0.385802	950.4	-109.548	3.96e-05	1.24662	41.51	14.8	4.4	1031.2	1031.2
1187	10_Av17_Mc18	76	N	2	4	10	2	1	2	551	19	F	Chinese	N			NA	Y	41	41		NA	NA	NA	0.630952	0.393939	0.538462	RMc18	RAv17	RAv17_2308.wav	0.648	853	1089.6	236.6	1007.8	73.78	852	1046	0.25	0.385802	950.4	-109.548	3.96e-05	1.24662	41.51	14.8	4.4	1031.2	1031.2
1188	10_Av17_Mc18	22	N	2	1	10	2	1	2	1124	31	F	English	Y	dogs, cats	6	NA	Y	56	49		47	46	93	0.452381	0.515152	0.692308	RMc18	RAv17	RAv17_2308.wav	0.648	853	1089.6	236.6	1007.8	73.78	852	1046	0.25	0.385802	950.4	-109.548	3.96e-05	1.24662	41.51	14.8	4.4	1031.2	1031.2
1189	10_Av17_Mc18	86	N	2	1	21	2	1	2	212	22	M	Chinese	N			NA	Y	44	35		NA	NA	NA	0.666667	0.515152	0.641026	RMc18	RAv17	RAv17_2308.wav	0.648	853	1089.6	236.6	1007.8	73.78	852	1046	0.25	0.385802	950.4	-109.548	3.96e-05	1.24662	41.51	14.8	4.4	1031.2	1031.2
1190	10_Av17_Mc18	17	N	2	2	26	2	1	2	1366	19	F	Chinese	N			NA	Y	49	34		NA	NA	NA	0.595238	1	0.487179	RMc18	RAv17	RAv17_2308.wav	0.648	853	1089.6	236.6	1007.8	73.78	852	1046	0.25	0.385802	950.4	-109.548	3.96e-05	1.24662	41.51	14.8	4.4	1031.2	1031.2
1191	10_Av17_Mc18	91	N	2	1	9	2	1	2	254	20	F	Chinese	N			NA	N	49	36		NA	NA	NA	0.547619	0.606061	0.641026	RMc18	RAv17	RAv17_2308.wav	0.648	853	1089.6	236.6	1007.8	73.78	852	1046	0.25	0.385802	950.4	-109.548	3.96e-05	1.24662	41.51	14.8	4.4	1031.2	1031.2
1192	10_Av17_Mc18	98	N	2	4	29	2	1	2	244	18	F	English	N			NA	Y	36	39		37	48	85	0.690476	0.393939	0.538462	RMc18	RAv17	RAv17_2308.wav	0.648	853	1089.6	236.6	1007.8	73.78	852	1046	0.25	0.385802	950.4	-109.548	3.96e-05	1.24662	41.51	14.8	4.4	1031.2	1031.2
1193	10_Av17_Mc18	60	N	2	2	23	2	1	2	243	18	F	Chinese	N			NA	Y	54	33		NA	NA	NA	0.595238	0.69697	0.615385	RMc18	RAv17	RAv17_2308.wav	0.648	853	1089.6	236.6	1007.8	73.78	852	1046	0.25	0.385802	950.4	-109.548	3.96e-05	1.24662	41.51	14.8	4.4	1031.2	1031.2
1194	10_Av17_Mc18	39	N	2	3	6	2	1	2	444	19	F	Spanish/English	N			NA	Y	55	38		41	43	84	0.583333	0.454545	0.538462	RMc18	RAv17	RAv17_2308.wav	0.648	853	1089.6	236.6	1007.8	73.78	852	1046	0.25	0.385802	950.4	-109.548	3.96e-05	1.24662	41.51	14.8	4.4	1031.2	1031.2
1195	10_Av17_Mc18	92	N	2	2	11	2	1	2	285	18	F	English	N			NA	Y	45	30		36	36	72	0.595238	0.212121	0.589744	RMc18	RAv17	RAv17_2308.wav	0.648	853	1089.6	236.6	1007.8	73.78	852	1046	0.25	0.385802	950.4	-109.548	3.96e-05	1.24662	41.51	14.8	4.4	1031.2	1031.2
1196	10_Av17_Mc18	73	N	2	1	27	2	1	2	338	19	F	English and Chinese	N			NA	Y	41	37		34	36	70	0.571429	0.575758	0.538462	RMc18	RAv17	RAv17_2308.wav	0.648	853	1089.6	236.6	1007.8	73.78	852	1046	0.25	0.385802	950.4	-109.548	3.96e-05	1.24662	41.51	14.8	4.4	1031.2	1031.2
1197	10_Av17_Mc18	89	N	2	1	22	2	1	2	662	18	F	Spanish	N			NA	Y	50	37		NA	NA	NA	0.619048	0.818182	0.589744	RMc18	RAv17	RAv17_2308.wav	0.648	853	1089.6	236.6	1007.8	73.78	852	1046	0.25	0.385802	950.4	-109.548	3.96e-05	1.24662	41.51	14.8	4.4	1031.2	1031.2
1198	10_Av17_Mc18	9	N	2	1	18	2	1	2	1000	19	M	English	Y	dogs, cats	3	NA	Y	41	31		35	32	67	0.416667	0.121212	0.435897	RMc18	RAv17	RAv17_2308.wav	0.648	853	1089.6	236.6	1007.8	73.78	852	1046	0.25	0.385802	950.4	-109.548	3.96e-05	1.24662	41.51	14.8	4.4	1031.2	1031.2
1199	10_Av17_Mc18	1	N	2	1	42	2	1	2	270	20	F	English	Y	cats, dogs	12	NA	Y	38	33		NA	40	NA	0.642857	0.333333	0.564103	RMc18	RAv17	RAv17_2308.wav	0.648	853	1089.6	236.6	1007.8	73.78	852	1046	0.25	0.385802	950.4	-109.548	3.96e-05	1.24662	41.51	14.8	4.4	1031.2	1031.2
1200	10_Av17_Mc18	38	N	2	4	12	2	1	2	1125	18	F	English	N			NA	Y	57	36		41	41	82	0.619048	0.606061	0.615385	RMc18	RAv17	RAv17_2308.wav	0.648	853	1089.6	236.6	1007.8	73.78	852	1046	0.25	0.385802	950.4	-109.548	3.96e-05	1.24662	41.51	14.8	4.4	1031.2	1031.2
1201	10_Av17_Mc18	65	N	2	2	16	2	1	2	177	20	F	Arabic	Y			NA	N	36	35		NA	NA	NA	0.559524	0.363636	0.564103	RMc18	RAv17	RAv17_2308.wav	0.648	853	1089.6	236.6	1007.8	73.78	852	1046	0.25	0.385802	950.4	-109.548	3.96e-05	1.24662	41.51	14.8	4.4	1031.2	1031.2
1202	10_Av17_Mc18	49	N	2	4	26	2	1	2	269	18	F	English	N			NA	N	44	28		42	2	44	0.642857	0.454545	0.487179	RMc18	RAv17	RAv17_2308.wav	0.648	853	1089.6	236.6	1007.8	73.78	852	1046	0.25	0.385802	950.4	-109.548	3.96e-05	1.24662	41.51	14.8	4.4	1031.2	1031.2
1203	10_Av17_Mc18	103	N	2	4	26	2	1	2	232	19	F	Korean + English	Y	dogs, cats	3	NA	Y	47	39		40	41	81	0.52381	0.393939	0.512821	RMc18	RAv17	RAv17_2308.wav	0.648	853	1089.6	236.6	1007.8	73.78	852	1046	0.25	0.385802	950.4	-109.548	3.96e-05	1.24662	41.51	14.8	4.4	1031.2	1031.2
1204	10_Av17_Mc18	42	N	2	2	4	2	1	2	376	19	F	English	N			NA	N	35	28		44	44	88	0.571429	0.454545	0.692308	RMc18	RAv17	RAv17_2308.wav	0.648	853	1089.6	236.6	1007.8	73.78	852	1046	0.25	0.385802	950.4	-109.548	3.96e-05	1.24662	41.51	14.8	4.4	1031.2	1031.2
1205	10_Av17_Mc18	52	N	2	2	19	2	1	2	1452	19	F	English	N			NA	Y	55	38		42	43	85	0.619048	0.393939	0.512821	RMc18	RAv17	RAv17_2308.wav	0.648	853	1089.6	236.6	1007.8	73.78	852	1046	0.25	0.385802	950.4	-109.548	3.96e-05	1.24662	41.51	14.8	4.4	1031.2	1031.2
1206	10_Av17_Mc18	3	N	2	2	42	2	1	2	387	28	M	English	N			NA	Y	39	30		45	42	87	0.559524	0.575758	0.487179	RMc18	RAv17	RAv17_2308.wav	0.648	853	1089.6	236.6	1007.8	73.78	852	1046	0.25	0.385802	950.4	-109.548	3.96e-05	1.24662	41.51	14.8	4.4	1031.2	1031.2
1207	10_Av17_Mc18	82	N	2	2	12	2	1	2	212	18	F	Korean	Y	dogs, cats	3	NA	Y	31	40		NA	NA	NA	0.559524	0.333333	0.641026	RMc18	RAv17	RAv17_2308.wav	0.648	853	1089.6	236.6	1007.8	73.78	852	1046	0.25	0.385802	950.4	-109.548	3.96e-05	1.24662	41.51	14.8	4.4	1031.2	1031.2
1208	10_Av17_Mc18	508	Y	2	2	16	2	1	2	166	40	F	English	Y	Rhesus macaque, pigtail macaque, sooty mangabey	192	120	Y	NA	NA		NA	NA	NA	0.511905	0.969697	0.641026	RMc18	RAv17	RAv17_2308.wav	0.648	853	1089.6	236.6	1007.8	73.78	852	1046	0.25	0.385802	950.4	-109.548	3.96e-05	1.24662	41.51	14.8	4.4	1031.2	1031.2
1209	10_Av17_Mc18	59	N	2	1	42	2	1	2	133	18	M	Gujarati	N			NA	N	37	38		NA	NA	NA	0.52381	0.393939	0.666667	RMc18	RAv17	RAv17_2308.wav	0.648	853	1089.6	236.6	1007.8	73.78	852	1046	0.25	0.385802	950.4	-109.548	3.96e-05	1.24662	41.51	14.8	4.4	1031.2	1031.2
1210	10_Av17_Mc18	55	N	2	4	17	2	1	2	281	18	F	Mandarin	N			NA	Y	64	30		NA	NA	NA	0.690476	0.515152	0.410256	RMc18	RAv17	RAv17_2308.wav	0.648	853	1089.6	236.6	1007.8	73.78	852	1046	0.25	0.385802	950.4	-109.548	3.96e-05	1.24662	41.51	14.8	4.4	1031.2	1031.2
1211	10_Av17_Mc18	510	Y	2	1	13	2	1	2	805	30	M	English	Y	Rhesus macaque, Sooty mangabey	60	60	Y	NA	NA	asked for more clarification on "intense emotion" ~3 min into task	NA	NA	NA	0.511905	0.727273	0.717949	RMc18	RAv17	RAv17_2308.wav	0.648	853	1089.6	236.6	1007.8	73.78	852	1046	0.25	0.385802	950.4	-109.548	3.96e-05	1.24662	41.51	14.8	4.4	1031.2	1031.2
1212	10_Av17_Mc18	104	N	2	1	31	2	1	2	463	19	F	Bangla	N			NA	N	49	31		NA	NA	NA	0.619048	0.363636	0.384615	RMc18	RAv17	RAv17_2308.wav	0.648	853	1089.6	236.6	1007.8	73.78	852	1046	0.25	0.385802	950.4	-109.548	3.96e-05	1.24662	41.51	14.8	4.4	1031.2	1031.2
1213	10_Av17_Mc18	69	N	2	2	16	2	1	2	267	20	F	English	N			NA	Y	40	37		42	43	85	0.547619	0.424242	0.615385	RMc18	RAv17	RAv17_2308.wav	0.648	853	1089.6	236.6	1007.8	73.78	852	1046	0.25	0.385802	950.4	-109.548	3.96e-05	1.24662	41.51	14.8	4.4	1031.2	1031.2
1214	10_Av17_Mc18	78	N	2	2	30	2	1	2	831	20	M	Spanish	Y	dogs, snakes	2	NA	Y	45	35		NA	NA	NA	0.547619	0.424242	0.487179	RMc18	RAv17	RAv17_2308.wav	0.648	853	1089.6	236.6	1007.8	73.78	852	1046	0.25	0.385802	950.4	-109.548	3.96e-05	1.24662	41.51	14.8	4.4	1031.2	1031.2
1215	10_Av17_Mc18	23	N	2	3	33	2	1	2	484	20	F	Mandarin	N			NA	N	38	33		NA	NA	NA	0.52381	0.575758	0.564103	RMc18	RAv17	RAv17_2308.wav	0.648	853	1089.6	236.6	1007.8	73.78	852	1046	0.25	0.385802	950.4	-109.548	3.96e-05	1.24662	41.51	14.8	4.4	1031.2	1031.2
1216	10_Av17_Mc18	85	N	2	1	11	2	1	2	396	19	F	Chinese	N			NA	Y	25	32		NA	NA	NA	0.571429	0.363636	0.435897	RMc18	RAv17	RAv17_2308.wav	0.648	853	1089.6	236.6	1007.8	73.78	852	1046	0.25	0.385802	950.4	-109.548	3.96e-05	1.24662	41.51	14.8	4.4	1031.2	1031.2
1217	10_Av17_Mc18	502	Y	2	1	37	2	1	2	226	39	F	English	Y	Rhesus, pigrails, gorillas, orangutans, lemurs	216	204	Y	63	30		45	43	88	0.642857	0.909091	0.666667	RMc18	RAv17	RAv17_2308.wav	0.648	853	1089.6	236.6	1007.8	73.78	852	1046	0.25	0.385802	950.4	-109.548	3.96e-05	1.24662	41.51	14.8	4.4	1031.2	1031.2
1218	10_Av17_Mc18	61	N	2	4	4	2	1	2	339	19	M	English	N			NA	Y	42	36		43	35	78	0.619048	0.424242	0.461538	RMc18	RAv17	RAv17_2308.wav	0.648	853	1089.6	236.6	1007.8	73.78	852	1046	0.25	0.385802	950.4	-109.548	3.96e-05	1.24662	41.51	14.8	4.4	1031.2	1031.2
1219	10_Av17_Mc18	113	N	2	3	10	2	1	2	261	18	F	English	N			NA	Y	52	38		47	41	88	0.583333	0.848485	0.564103	RMc18	RAv17	RAv17_2308.wav	0.648	853	1089.6	236.6	1007.8	73.78	852	1046	0.25	0.385802	950.4	-109.548	3.96e-05	1.24662	41.51	14.8	4.4	1031.2	1031.2
1220	10_Av17_Mc18	81	N	2	4	27	2	1	2	331	18	F	English	N			NA	Y	53	33		43	51	94	0.690476	0.454545	0.538462	RMc18	RAv17	RAv17_2308.wav	0.648	853	1089.6	236.6	1007.8	73.78	852	1046	0.25	0.385802	950.4	-109.548	3.96e-05	1.24662	41.51	14.8	4.4	1031.2	1031.2
1221	10_Av17_Mc18	41	N	2	4	24	2	1	2	258	20	M	Vietnamese	N			NA	Y	45	29		NA	NA	NA	0.630952	0.454545	0.435897	RMc18	RAv17	RAv17_2308.wav	0.648	853	1089.6	236.6	1007.8	73.78	852	1046	0.25	0.385802	950.4	-109.548	3.96e-05	1.24662	41.51	14.8	4.4	1031.2	1031.2
1222	10_Av17_Mc18	28	N	2	2	24	2	1	2	293	40	F	English	N			NA	Y	50	33		42	NA	NA	0.630952	0.606061	0.564103	RMc18	RAv17	RAv17_2308.wav	0.648	853	1089.6	236.6	1007.8	73.78	852	1046	0.25	0.385802	950.4	-109.548	3.96e-05	1.24662	41.51	14.8	4.4	1031.2	1031.2
1223	10_Av17_Mc18	505	Y	2	2	2	2	1	2	1261	30	F	English	Y	Rhesus macaque, horses, dogs, cats, birds, mangabey	120	94	Y	NA	NA		NA	NA	NA	0.595238	1	0.589744	RMc18	RAv17	RAv17_2308.wav	0.648	853	1089.6	236.6	1007.8	73.78	852	1046	0.25	0.385802	950.4	-109.548	3.96e-05	1.24662	41.51	14.8	4.4	1031.2	1031.2
1224	10_Av17_Mc18	109	N	2	3	29	2	1	2	208	20	F	English	N			NA	Y	41	33		45	43	88	0.666667	0.727273	0.384615	RMc18	RAv17	RAv17_2308.wav	0.648	853	1089.6	236.6	1007.8	73.78	852	1046	0.25	0.385802	950.4	-109.548	3.96e-05	1.24662	41.51	14.8	4.4	1031.2	1031.2
1225	10_Av17_Mc18	94	N	2	2	34	2	1	2	253	20	F	English	N			NA	Y	45	44		40	44	84	0.72619	0.878788	0.410256	RMc18	RAv17	RAv17_2308.wav	0.648	853	1089.6	236.6	1007.8	73.78	852	1046	0.25	0.385802	950.4	-109.548	3.96e-05	1.24662	41.51	14.8	4.4	1031.2	1031.2
1226	10_Av17_Mc18	8	N	2	1	6	2	1	2	295	19	F	English	Y	dogs, cats	24	NA	Y	58	40		39	43	82	0.595238	0.363636	0.589744	RMc18	RAv17	RAv17_2308.wav	0.648	853	1089.6	236.6	1007.8	73.78	852	1046	0.25	0.385802	950.4	-109.548	3.96e-05	1.24662	41.51	14.8	4.4	1031.2	1031.2
1227	10_Av17_Mc18	87	N	2	4	15	2	1	2	359	19	F	Korean	N			NA	Y	53	41		NA	NA	NA	0.654762	0.787879	0.615385	RMc18	RAv17	RAv17_2308.wav	0.648	853	1089.6	236.6	1007.8	73.78	852	1046	0.25	0.385802	950.4	-109.548	3.96e-05	1.24662	41.51	14.8	4.4	1031.2	1031.2
1228	10_Av17_Mc18	25	N	2	3	39	2	1	2	55	21	M	English	N			NA	N	56	32		34	41	75	0.5	0.575758	0.461538	RMc18	RAv17	RAv17_2308.wav	0.648	853	1089.6	236.6	1007.8	73.78	852	1046	0.25	0.385802	950.4	-109.548	3.96e-05	1.24662	41.51	14.8	4.4	1031.2	1031.2
1229	10_Av17_Mc18	62	N	2	4	14	2	1	2	229	18	F	English	Y	mice	1	NA	Y	59	32		46	40	86	0.559524	0.484848	0.538462	RMc18	RAv17	RAv17_2308.wav	0.648	853	1089.6	236.6	1007.8	73.78	852	1046	0.25	0.385802	950.4	-109.548	3.96e-05	1.24662	41.51	14.8	4.4	1031.2	1031.2
1230	10_Av17_Mc18	16	N	2	1	28	2	1	2	252	21	F	English	Y	dogs, cats	6	NA	Y	44	43		38	40	78	0.559524	0.545455	0.461538	RMc18	RAv17	RAv17_2308.wav	0.648	853	1089.6	236.6	1007.8	73.78	852	1046	0.25	0.385802	950.4	-109.548	3.96e-05	1.24662	41.51	14.8	4.4	1031.2	1031.2
1231	10_Av17_Mc18	12	N	2	4	41	2	1	2	452	21	M	Chinese	N			NA	Y	41	34		NA	NA	NA	0.642857	0.484848	0.410256	RMc18	RAv17	RAv17_2308.wav	0.648	853	1089.6	236.6	1007.8	73.78	852	1046	0.25	0.385802	950.4	-109.548	3.96e-05	1.24662	41.51	14.8	4.4	1031.2	1031.2
1232	10_Av17_Mc18	68	N	2	2	38	2	1	2	309	19	M	Spanish	N			NA	N	48	NA	didn't fill out this questionnaire animal	NA	NA	NA	0.607143	0.333333	0.641026	RMc18	RAv17	RAv17_2308.wav	0.648	853	1089.6	236.6	1007.8	73.78	852	1046	0.25	0.385802	950.4	-109.548	3.96e-05	1.24662	41.51	14.8	4.4	1031.2	1031.2
1233	10_Av17_Mc18	71	N	2	2	30	2	1	2	321	19	M	English	N			NA	Y	44	36		43	43	86	0.595238	0.424242	0.333333	RMc18	RAv17	RAv17_2308.wav	0.648	853	1089.6	236.6	1007.8	73.78	852	1046	0.25	0.385802	950.4	-109.548	3.96e-05	1.24662	41.51	14.8	4.4	1031.2	1031.2
1234	10_Av17_Mc18	513	Y	2	1	26	2	1	2	696	53	F	English	Y	chimps, bonobos, Rhesus macaque, Sooty mangabeys, pigtail macaque, gibbons, orangutan, stumptail macaques, baboons	288	288	Y	NA	NA		NA	NA	NA	0.535714	0.969697	0.589744	RMc18	RAv17	RAv17_2308.wav	0.648	853	1089.6	236.6	1007.8	73.78	852	1046	0.25	0.385802	950.4	-109.548	3.96e-05	1.24662	41.51	14.8	4.4	1031.2	1031.2
1235	10_Av17_Mc18	110	N	2	1	36	2	1	2	199	19	M	English	N			NA	Y	40	32		35	38	73	0.511905	0.69697	0.564103	RMc18	RAv17	RAv17_2308.wav	0.648	853	1089.6	236.6	1007.8	73.78	852	1046	0.25	0.385802	950.4	-109.548	3.96e-05	1.24662	41.51	14.8	4.4	1031.2	1031.2
1236	10_Av17_Mc18	74	N	2	4	23	2	1	2	510	19	F	English	Y	cats, dogs	1	NA	Y	47	41		41	43	84	0.428571	0.272727	0.538462	RMc18	RAv17	RAv17_2308.wav	0.648	853	1089.6	236.6	1007.8	73.78	852	1046	0.25	0.385802	950.4	-109.548	3.96e-05	1.24662	41.51	14.8	4.4	1031.2	1031.2
1237	10_Av17_Mc18	44	N	2	1	31	2	1	2	252	31	F	English	N			NA	Y	39	34		47	45	92	0.571429	0.606061	0.333333	RMc18	RAv17	RAv17_2308.wav	0.648	853	1089.6	236.6	1007.8	73.78	852	1046	0.25	0.385802	950.4	-109.548	3.96e-05	1.24662	41.51	14.8	4.4	1031.2	1031.2
1238	10_Av17_Mc18	100	N	2	3	28	2	1	2	468	21	F	Mandarin	N			NA	Y	50	36		NA	NA	NA	0.619048	0.424242	0.641026	RMc18	RAv17	RAv17_2308.wav	0.648	853	1089.6	236.6	1007.8	73.78	852	1046	0.25	0.385802	950.4	-109.548	3.96e-05	1.24662	41.51	14.8	4.4	1031.2	1031.2
1239	10_Av17_Mc18	56	N	2	2	41	2	1	2	672	18	F	Chinese	N			NA	Y	31	30		NA	NA	NA	0.595238	0.575758	0.384615	RMc18	RAv17	RAv17_2308.wav	0.648	853	1089.6	236.6	1007.8	73.78	852	1046	0.25	0.385802	950.4	-109.548	3.96e-05	1.24662	41.51	14.8	4.4	1031.2	1031.2
1240	10_Av17_Mc18	27	N	2	4	6	2	0	1	454	23	F	Telugu	N			NA	N	32	44		NA	NA	NA	0.547619	0.151515	0.512821	RMc18	RAv17	RAv17_2308.wav	0.648	853	1089.6	236.6	1007.8	73.78	852	1046	0.25	0.385802	950.4	-109.548	3.96e-05	1.24662	41.51	14.8	4.4	1031.2	1031.2
1241	10_Av17_Mc18	84	N	2	3	39	2	0	1	539	19	F	English	N			NA	Y	34	36		35	37	72	0.547619	0.575758	0.512821	RMc18	RAv17	RAv17_2308.wav	0.648	853	1089.6	236.6	1007.8	73.78	852	1046	0.25	0.385802	950.4	-109.548	3.96e-05	1.24662	41.51	14.8	4.4	1031.2	1031.2
1242	10_Av17_Mc18	48	N	2	1	26	2	1	2	330	19	F	English	N			NA	Y	33	36		36	46	82	0.654762	0.606061	0.564103	RMc18	RAv17	RAv17_2308.wav	0.648	853	1089.6	236.6	1007.8	73.78	852	1046	0.25	0.385802	950.4	-109.548	3.96e-05	1.24662	41.51	14.8	4.4	1031.2	1031.2
1243	10_Av17_Mc18	24	N	2	2	19	2	0	1	1095	20	M	English	N			NA	N	41	24		35	36	71	0.404762	0.363636	0.666667	RMc18	RAv17	RAv17_2308.wav	0.648	853	1089.6	236.6	1007.8	73.78	852	1046	0.25	0.385802	950.4	-109.548	3.96e-05	1.24662	41.51	14.8	4.4	1031.2	1031.2
1244	10_Av17_Mc18	21	N	2	1	26	2	1	2	213	20	F	English	Y	dogs	6	NA	Y	44	37		41	34	75	0.630952	0.787879	0.384615	RMc18	RAv17	RAv17_2308.wav	0.648	853	1089.6	236.6	1007.8	73.78	852	1046	0.25	0.385802	950.4	-109.548	3.96e-05	1.24662	41.51	14.8	4.4	1031.2	1031.2
1245	10_Av17_Mc18	77	N	2	3	24	2	1	2	19	19	M	Chinese	N			NA	Y	46	18		NA	NA	NA	0.595238	0.454545	0.538462	RMc18	RAv17	RAv17_2308.wav	0.648	853	1089.6	236.6	1007.8	73.78	852	1046	0.25	0.385802	950.4	-109.548	3.96e-05	1.24662	41.51	14.8	4.4	1031.2	1031.2
1246	10_Av17_Mc18	34	N	2	3	29	2	1	2	572	24	M	Mandarin	N			NA	N	15	37		NA	NA	NA	0.511905	0.757576	0.282051	RMc18	RAv17	RAv17_2308.wav	0.648	853	1089.6	236.6	1007.8	73.78	852	1046	0.25	0.385802	950.4	-109.548	3.96e-05	1.24662	41.51	14.8	4.4	1031.2	1031.2
1247	10_Av17_Mc18	72	N	2	3	41	2	0	1	767	19	F	English	N			NA	Y	48	33		35	31	66	0.511905	0.69697	0.538462	RMc18	RAv17	RAv17_2308.wav	0.648	853	1089.6	236.6	1007.8	73.78	852	1046	0.25	0.385802	950.4	-109.548	3.96e-05	1.24662	41.51	14.8	4.4	1031.2	1031.2
1248	10_Av17_Mc18	99	N	2	1	1	2	1	2	911	19	F	English + Hindi	N			NA	Y	56	37		37	39	76	0.595238	0.30303	0.461538	RMc18	RAv17	RAv17_2308.wav	0.648	853	1089.6	236.6	1007.8	73.78	852	1046	0.25	0.385802	950.4	-109.548	3.96e-05	1.24662	41.51	14.8	4.4	1031.2	1031.2
1249	10_Av17_Mc18	14	N	2	1	13	2	1	2	896	19	M	English and Mandarin	N			NA	N	43	35		32	39	71	0.642857	0.818182	0.615385	RMc18	RAv17	RAv17_2308.wav	0.648	853	1089.6	236.6	1007.8	73.78	852	1046	0.25	0.385802	950.4	-109.548	3.96e-05	1.24662	41.51	14.8	4.4	1031.2	1031.2
1250	10_Av17_Mc18	20	Y	2	2	37	2	0	1	260	37	F	English	Y	Rhesus, chimpanzees, dogs, cats, mice, rats	180	132	Y	52	33		46	47	93	0.392857	0.454545	0.589744	RMc18	RAv17	RAv17_2308.wav	0.648	853	1089.6	236.6	1007.8	73.78	852	1046	0.25	0.385802	950.4	-109.548	3.96e-05	1.24662	41.51	14.8	4.4	1031.2	1031.2
1251	11_Mc18_Lq16	24	N	2	2	7	1	0	2	230	20	M	English	N			NA	N	41	24		35	36	71	0.404762	0.363636	0.666667	RMc18	RLq16	RMc18_2342.wav	0.616	781.2	1456.5	675.3	1260.1	202.73	781	1378	0.32	0.519481	2110.94	-265.203	3.7e-05	1.32919	41.03	13.01	1.82	1218.8	1265.6
1252	11_Mc18_Lq16	84	N	2	3	32	1	0	2	291	19	F	English	N			NA	Y	34	36		35	37	72	0.547619	0.575758	0.512821	RMc18	RLq16	RMc18_2342.wav	0.616	781.2	1456.5	675.3	1260.1	202.73	781	1378	0.32	0.519481	2110.94	-265.203	3.7e-05	1.32919	41.03	13.01	1.82	1218.8	1265.6
1253	11_Mc18_Lq16	26	N	2	1	12	1	1	1	269	24	M	Telugu	N			NA	N	41	35		NA	NA	NA	0.607143	0.515152	0.538462	RMc18	RLq16	RMc18_2342.wav	0.616	781.2	1456.5	675.3	1260.1	202.73	781	1378	0.32	0.519481	2110.94	-265.203	3.7e-05	1.32919	41.03	13.01	1.82	1218.8	1265.6
1254	11_Mc18_Lq16	79	N	2	1	10	1	1	1	201	21	M	English	N			NA	Y	55	38		33	34	67	0.571429	0.393939	0.564103	RMc18	RLq16	RMc18_2342.wav	0.616	781.2	1456.5	675.3	1260.1	202.73	781	1378	0.32	0.519481	2110.94	-265.203	3.7e-05	1.32919	41.03	13.01	1.82	1218.8	1265.6
1255	11_Mc18_Lq16	68	N	2	2	41	1	1	1	218	19	M	Spanish	N			NA	N	48	NA	didn't fill out this questionnaire animal	NA	NA	NA	0.607143	0.333333	0.641026	RMc18	RLq16	RMc18_2342.wav	0.616	781.2	1456.5	675.3	1260.1	202.73	781	1378	0.32	0.519481	2110.94	-265.203	3.7e-05	1.32919	41.03	13.01	1.82	1218.8	1265.6
1256	11_Mc18_Lq16	62	N	2	4	2	1	1	1	241	18	F	English	Y	mice	1	NA	Y	59	32		46	40	86	0.559524	0.484848	0.538462	RMc18	RLq16	RMc18_2342.wav	0.616	781.2	1456.5	675.3	1260.1	202.73	781	1378	0.32	0.519481	2110.94	-265.203	3.7e-05	1.32919	41.03	13.01	1.82	1218.8	1265.6
1257	11_Mc18_Lq16	96	N	2	1	21	1	1	1	332	18	F	English	N			NA	Y	59	39		44	47	91	0.583333	0.727273	0.512821	RMc18	RLq16	RMc18_2342.wav	0.616	781.2	1456.5	675.3	1260.1	202.73	781	1378	0.32	0.519481	2110.94	-265.203	3.7e-05	1.32919	41.03	13.01	1.82	1218.8	1265.6
1258	11_Mc18_Lq16	63	N	2	4	17	1	0	2	1208	19	F	English	N			NA	N	60	40		44	42	86	0.535714	0	0.717949	RMc18	RLq16	RMc18_2342.wav	0.616	781.2	1456.5	675.3	1260.1	202.73	781	1378	0.32	0.519481	2110.94	-265.203	3.7e-05	1.32919	41.03	13.01	1.82	1218.8	1265.6
1259	11_Mc18_Lq16	98	N	2	4	27	1	1	1	318	18	F	English	N			NA	Y	36	39		37	48	85	0.690476	0.393939	0.538462	RMc18	RLq16	RMc18_2342.wav	0.616	781.2	1456.5	675.3	1260.1	202.73	781	1378	0.32	0.519481	2110.94	-265.203	3.7e-05	1.32919	41.03	13.01	1.82	1218.8	1265.6
1260	11_Mc18_Lq16	51	N	2	1	20	1	1	1	769	18	F	English	N			NA	Y	31	36		45	44	89	0.654762	0.515152	0.615385	RMc18	RLq16	RMc18_2342.wav	0.616	781.2	1456.5	675.3	1260.1	202.73	781	1378	0.32	0.519481	2110.94	-265.203	3.7e-05	1.32919	41.03	13.01	1.82	1218.8	1265.6
1261	11_Mc18_Lq16	110	N	2	1	35	1	1	1	367	19	M	English	N			NA	Y	40	32		35	38	73	0.511905	0.69697	0.564103	RMc18	RLq16	RMc18_2342.wav	0.616	781.2	1456.5	675.3	1260.1	202.73	781	1378	0.32	0.519481	2110.94	-265.203	3.7e-05	1.32919	41.03	13.01	1.82	1218.8	1265.6
1262	11_Mc18_Lq16	66	N	2	2	5	1	1	1	1725	20	M	Chinese	N			NA	N	41	38		NA	NA	NA	0.47619	0.69697	0.512821	RMc18	RLq16	RMc18_2342.wav	0.616	781.2	1456.5	675.3	1260.1	202.73	781	1378	0.32	0.519481	2110.94	-265.203	3.7e-05	1.32919	41.03	13.01	1.82	1218.8	1265.6
1263	11_Mc18_Lq16	510	Y	2	1	4	1	1	1	294	30	M	English	Y	Rhesus macaque, Sooty mangabey	60	60	Y	NA	NA	asked for more clarification on "intense emotion" ~3 min into task	NA	NA	NA	0.511905	0.727273	0.717949	RMc18	RLq16	RMc18_2342.wav	0.616	781.2	1456.5	675.3	1260.1	202.73	781	1378	0.32	0.519481	2110.94	-265.203	3.7e-05	1.32919	41.03	13.01	1.82	1218.8	1265.6
1264	11_Mc18_Lq16	106	N	2	4	28	1	1	1	372	18	F	Korean	N			NA	Y	53	39		NA	NA	NA	0.607143	0.606061	0.461538	RMc18	RLq16	RMc18_2342.wav	0.616	781.2	1456.5	675.3	1260.1	202.73	781	1378	0.32	0.519481	2110.94	-265.203	3.7e-05	1.32919	41.03	13.01	1.82	1218.8	1265.6
1265	11_Mc18_Lq16	4	N	2	3	28	1	0	2	3471	20	M	English	N			NA	N	43	38		27	24	51	0.559524	0.424242	0.589744	RMc18	RLq16	RMc18_2342.wav	0.616	781.2	1456.5	675.3	1260.1	202.73	781	1378	0.32	0.519481	2110.94	-265.203	3.7e-05	1.32919	41.03	13.01	1.82	1218.8	1265.6
1266	11_Mc18_Lq16	511	Y	2	1	31	1	1	1	360	24	F	English	Y	Rhesus macaque, domestic cats	24	24	Y	NA	NA		NA	NA	NA	0.571429	0.69697	0.512821	RMc18	RLq16	RMc18_2342.wav	0.616	781.2	1456.5	675.3	1260.1	202.73	781	1378	0.32	0.519481	2110.94	-265.203	3.7e-05	1.32919	41.03	13.01	1.82	1218.8	1265.6
1267	11_Mc18_Lq16	5	N	2	3	22	1	1	1	1168	29	F	English	Y	cat, dog, horse, cow	6+ years	NA	Y	41	35		46	49	95	0.583333	0.393939	0.564103	RMc18	RLq16	RMc18_2342.wav	0.616	781.2	1456.5	675.3	1260.1	202.73	781	1378	0.32	0.519481	2110.94	-265.203	3.7e-05	1.32919	41.03	13.01	1.82	1218.8	1265.6
1268	11_Mc18_Lq16	505	Y	2	2	35	1	1	1	776	30	F	English	Y	Rhesus macaque, horses, dogs, cats, birds, mangabey	120	94	Y	NA	NA		NA	NA	NA	0.595238	1	0.589744	RMc18	RLq16	RMc18_2342.wav	0.616	781.2	1456.5	675.3	1260.1	202.73	781	1378	0.32	0.519481	2110.94	-265.203	3.7e-05	1.32919	41.03	13.01	1.82	1218.8	1265.6
1269	11_Mc18_Lq16	36	N	2	3	21	1	1	1	609	19	F	English	Y	dogs, cats	4	NA	Y	53	31		42	42	84	0.416667	0.606061	0.435897	RMc18	RLq16	RMc18_2342.wav	0.616	781.2	1456.5	675.3	1260.1	202.73	781	1378	0.32	0.519481	2110.94	-265.203	3.7e-05	1.32919	41.03	13.01	1.82	1218.8	1265.6
1270	11_Mc18_Lq16	71	N	2	2	32	1	1	1	68	19	M	English	N			NA	Y	44	36		43	43	86	0.595238	0.424242	0.333333	RMc18	RLq16	RMc18_2342.wav	0.616	781.2	1456.5	675.3	1260.1	202.73	781	1378	0.32	0.519481	2110.94	-265.203	3.7e-05	1.32919	41.03	13.01	1.82	1218.8	1265.6
1271	11_Mc18_Lq16	111	N	2	3	1	1	0	2	371	21	F	English	N			NA	N	39	39		40	36	76	0.511905	0.575758	0.512821	RMc18	RLq16	RMc18_2342.wav	0.616	781.2	1456.5	675.3	1260.1	202.73	781	1378	0.32	0.519481	2110.94	-265.203	3.7e-05	1.32919	41.03	13.01	1.82	1218.8	1265.6
1272	11_Mc18_Lq16	39	N	2	3	7	1	1	1	705	19	F	Spanish/English	N			NA	Y	55	38		41	43	84	0.583333	0.454545	0.538462	RMc18	RLq16	RMc18_2342.wav	0.616	781.2	1456.5	675.3	1260.1	202.73	781	1378	0.32	0.519481	2110.94	-265.203	3.7e-05	1.32919	41.03	13.01	1.82	1218.8	1265.6
1273	11_Mc18_Lq16	80	N	2	4	27	1	1	1	397	18	F	English	N			NA	Y	57	34		36	3	39	0.607143	0.545455	0.358974	RMc18	RLq16	RMc18_2342.wav	0.616	781.2	1456.5	675.3	1260.1	202.73	781	1378	0.32	0.519481	2110.94	-265.203	3.7e-05	1.32919	41.03	13.01	1.82	1218.8	1265.6
1274	11_Mc18_Lq16	90	N	2	3	26	1	1	1	210	21	M	English	N			NA	N	43	24		42	42	84	0.52381	0.69697	0.641026	RMc18	RLq16	RMc18_2342.wav	0.616	781.2	1456.5	675.3	1260.1	202.73	781	1378	0.32	0.519481	2110.94	-265.203	3.7e-05	1.32919	41.03	13.01	1.82	1218.8	1265.6
1275	11_Mc18_Lq16	102	N	2	1	30	1	1	1	82	18	F	English	Y	elephants, dogs, tortoises	3	NA	Y	46	44		33	36	69	0.559524	0.424242	0.461538	RMc18	RLq16	RMc18_2342.wav	0.616	781.2	1456.5	675.3	1260.1	202.73	781	1378	0.32	0.519481	2110.94	-265.203	3.7e-05	1.32919	41.03	13.01	1.82	1218.8	1265.6
1276	11_Mc18_Lq16	8	N	2	1	38	1	1	1	2246	19	F	English	Y	dogs, cats	24	NA	Y	58	40		39	43	82	0.595238	0.363636	0.589744	RMc18	RLq16	RMc18_2342.wav	0.616	781.2	1456.5	675.3	1260.1	202.73	781	1378	0.32	0.519481	2110.94	-265.203	3.7e-05	1.32919	41.03	13.01	1.82	1218.8	1265.6
1277	11_Mc18_Lq16	17	N	2	2	9	1	1	1	635	19	F	Chinese	N			NA	Y	49	34		NA	NA	NA	0.595238	1	0.487179	RMc18	RLq16	RMc18_2342.wav	0.616	781.2	1456.5	675.3	1260.1	202.73	781	1378	0.32	0.519481	2110.94	-265.203	3.7e-05	1.32919	41.03	13.01	1.82	1218.8	1265.6
1278	11_Mc18_Lq16	76	N	2	4	15	1	1	1	267	19	F	Chinese	N			NA	Y	41	41		NA	NA	NA	0.630952	0.393939	0.538462	RMc18	RLq16	RMc18_2342.wav	0.616	781.2	1456.5	675.3	1260.1	202.73	781	1378	0.32	0.519481	2110.94	-265.203	3.7e-05	1.32919	41.03	13.01	1.82	1218.8	1265.6
1279	11_Mc18_Lq16	512	Y	2	2	29	1	1	1	348	39	M	English	Y	Rhesus macaque, pigtail macaque, common chimpanzee, west lowland gorilla, Sooty mangabey	144	144	Y	NA	NA	occasionally needed to answer radio during task	NA	NA	NA	0.642857	1	0.589744	RMc18	RLq16	RMc18_2342.wav	0.616	781.2	1456.5	675.3	1260.1	202.73	781	1378	0.32	0.519481	2110.94	-265.203	3.7e-05	1.32919	41.03	13.01	1.82	1218.8	1265.6
1280	11_Mc18_Lq16	83	N	2	3	29	1	1	1	457	19	F	English	N			NA	Y	55	46		48	46	94	0.5	0.333333	0.487179	RMc18	RLq16	RMc18_2342.wav	0.616	781.2	1456.5	675.3	1260.1	202.73	781	1378	0.32	0.519481	2110.94	-265.203	3.7e-05	1.32919	41.03	13.01	1.82	1218.8	1265.6
1281	11_Mc18_Lq16	104	N	2	1	9	1	1	1	1458	19	F	Bangla	N			NA	N	49	31		NA	NA	NA	0.619048	0.363636	0.384615	RMc18	RLq16	RMc18_2342.wav	0.616	781.2	1456.5	675.3	1260.1	202.73	781	1378	0.32	0.519481	2110.94	-265.203	3.7e-05	1.32919	41.03	13.01	1.82	1218.8	1265.6
1282	11_Mc18_Lq16	21	N	2	1	38	1	1	1	283	20	F	English	Y	dogs	6	NA	Y	44	37		41	34	75	0.630952	0.787879	0.384615	RMc18	RLq16	RMc18_2342.wav	0.616	781.2	1456.5	675.3	1260.1	202.73	781	1378	0.32	0.519481	2110.94	-265.203	3.7e-05	1.32919	41.03	13.01	1.82	1218.8	1265.6
1283	11_Mc18_Lq16	67	N	2	3	9	1	1	1	951	18	F	English	N			NA	N	29	44		32	32	64	0.75	0.636364	0.564103	RMc18	RLq16	RMc18_2342.wav	0.616	781.2	1456.5	675.3	1260.1	202.73	781	1378	0.32	0.519481	2110.94	-265.203	3.7e-05	1.32919	41.03	13.01	1.82	1218.8	1265.6
1284	11_Mc18_Lq16	53	N	2	1	31	1	1	1	331	18	F	English	N			NA	N	71	47		22	17	39	0.642857	0.787879	0.641026	RMc18	RLq16	RMc18_2342.wav	0.616	781.2	1456.5	675.3	1260.1	202.73	781	1378	0.32	0.519481	2110.94	-265.203	3.7e-05	1.32919	41.03	13.01	1.82	1218.8	1265.6
1285	11_Mc18_Lq16	50	N	2	4	42	1	0	2	144	19	F	English	Y	dogs, cats	12	NA	Y	53	40		24	19	43	0.5	0.212121	0.512821	RMc18	RLq16	RMc18_2342.wav	0.616	781.2	1456.5	675.3	1260.1	202.73	781	1378	0.32	0.519481	2110.94	-265.203	3.7e-05	1.32919	41.03	13.01	1.82	1218.8	1265.6
1286	11_Mc18_Lq16	42	N	2	2	29	1	1	1	355	19	F	English	N			NA	N	35	28		44	44	88	0.571429	0.454545	0.692308	RMc18	RLq16	RMc18_2342.wav	0.616	781.2	1456.5	675.3	1260.1	202.73	781	1378	0.32	0.519481	2110.94	-265.203	3.7e-05	1.32919	41.03	13.01	1.82	1218.8	1265.6
1287	11_Mc18_Lq16	75	N	2	2	16	1	1	1	1047	19	M	Chinese	Y	fruitfly, termites	1.5	NA	N	58	38		NA	NA	NA	0.547619	0.484848	0.461538	RMc18	RLq16	RMc18_2342.wav	0.616	781.2	1456.5	675.3	1260.1	202.73	781	1378	0.32	0.519481	2110.94	-265.203	3.7e-05	1.32919	41.03	13.01	1.82	1218.8	1265.6
1288	11_Mc18_Lq16	56	N	2	2	18	1	1	1	321	18	F	Chinese	N			NA	Y	31	30		NA	NA	NA	0.595238	0.575758	0.384615	RMc18	RLq16	RMc18_2342.wav	0.616	781.2	1456.5	675.3	1260.1	202.73	781	1378	0.32	0.519481	2110.94	-265.203	3.7e-05	1.32919	41.03	13.01	1.82	1218.8	1265.6
1289	11_Mc18_Lq16	38	N	2	4	38	1	1	1	440	18	F	English	N			NA	Y	57	36		41	41	82	0.619048	0.606061	0.615385	RMc18	RLq16	RMc18_2342.wav	0.616	781.2	1456.5	675.3	1260.1	202.73	781	1378	0.32	0.519481	2110.94	-265.203	3.7e-05	1.32919	41.03	13.01	1.82	1218.8	1265.6
1290	11_Mc18_Lq16	73	N	2	1	16	1	1	1	300	19	F	English and Chinese	N			NA	Y	41	37		34	36	70	0.571429	0.575758	0.538462	RMc18	RLq16	RMc18_2342.wav	0.616	781.2	1456.5	675.3	1260.1	202.73	781	1378	0.32	0.519481	2110.94	-265.203	3.7e-05	1.32919	41.03	13.01	1.82	1218.8	1265.6
1291	11_Mc18_Lq16	43	N	2	3	25	1	1	1	807	19	M	English	N			NA	Y	37	39		36	40	76	0.595238	0.666667	0.589744	RMc18	RLq16	RMc18_2342.wav	0.616	781.2	1456.5	675.3	1260.1	202.73	781	1378	0.32	0.519481	2110.94	-265.203	3.7e-05	1.32919	41.03	13.01	1.82	1218.8	1265.6
1292	11_Mc18_Lq16	29	N	2	1	12	1	1	1	445	19	F	English	Y	dogs, cats	3	NA	Y	63	44		47	41	88	0.547619	0.454545	0.512821	RMc18	RLq16	RMc18_2342.wav	0.616	781.2	1456.5	675.3	1260.1	202.73	781	1378	0.32	0.519481	2110.94	-265.203	3.7e-05	1.32919	41.03	13.01	1.82	1218.8	1265.6
1293	11_Mc18_Lq16	108	N	2	2	8	1	1	1	308	19	M	English	N			NA	N	59	24		45	43	88	0.571429	0.393939	0.435897	RMc18	RLq16	RMc18_2342.wav	0.616	781.2	1456.5	675.3	1260.1	202.73	781	1378	0.32	0.519481	2110.94	-265.203	3.7e-05	1.32919	41.03	13.01	1.82	1218.8	1265.6
1294	11_Mc18_Lq16	37	N	2	2	20	1	1	1	205	19	F	Spanish	N			NA	Y	44	32		NA	NA	NA	0.52381	0.606061	0.641026	RMc18	RLq16	RMc18_2342.wav	0.616	781.2	1456.5	675.3	1260.1	202.73	781	1378	0.32	0.519481	2110.94	-265.203	3.7e-05	1.32919	41.03	13.01	1.82	1218.8	1265.6
1295	11_Mc18_Lq16	100	N	2	3	35	1	1	1	633	21	F	Mandarin	N			NA	Y	50	36		NA	NA	NA	0.619048	0.424242	0.641026	RMc18	RLq16	RMc18_2342.wav	0.616	781.2	1456.5	675.3	1260.1	202.73	781	1378	0.32	0.519481	2110.94	-265.203	3.7e-05	1.32919	41.03	13.01	1.82	1218.8	1265.6
1296	11_Mc18_Lq16	28	N	2	2	4	1	1	1	265	40	F	English	N			NA	Y	50	33		42	NA	NA	0.630952	0.606061	0.564103	RMc18	RLq16	RMc18_2342.wav	0.616	781.2	1456.5	675.3	1260.1	202.73	781	1378	0.32	0.519481	2110.94	-265.203	3.7e-05	1.32919	41.03	13.01	1.82	1218.8	1265.6
1297	11_Mc18_Lq16	101	N	2	4	20	1	1	1	1435	19	F	English	Y	mice	11	NA	Y	50	40		43	43	86	0.690476	0.484848	0.487179	RMc18	RLq16	RMc18_2342.wav	0.616	781.2	1456.5	675.3	1260.1	202.73	781	1378	0.32	0.519481	2110.94	-265.203	3.7e-05	1.32919	41.03	13.01	1.82	1218.8	1265.6
1298	11_Mc18_Lq16	107	N	2	4	3	1	1	1	409	22	F	Chinese	N			NA	N	21	37		NA	NA	NA	0.595238	0.424242	0.435897	RMc18	RLq16	RMc18_2342.wav	0.616	781.2	1456.5	675.3	1260.1	202.73	781	1378	0.32	0.519481	2110.94	-265.203	3.7e-05	1.32919	41.03	13.01	1.82	1218.8	1265.6
1299	11_Mc18_Lq16	6	N	2	1	23	1	1	1	458	23	M	English	Y	mice	3	NA	Y	31	28		38	41	79	0.595238	0.484848	0.589744	RMc18	RLq16	RMc18_2342.wav	0.616	781.2	1456.5	675.3	1260.1	202.73	781	1378	0.32	0.519481	2110.94	-265.203	3.7e-05	1.32919	41.03	13.01	1.82	1218.8	1265.6
1300	11_Mc18_Lq16	113	N	2	3	26	1	1	1	4831	18	F	English	N			NA	Y	52	38		47	41	88	0.583333	0.848485	0.564103	RMc18	RLq16	RMc18_2342.wav	0.616	781.2	1456.5	675.3	1260.1	202.73	781	1378	0.32	0.519481	2110.94	-265.203	3.7e-05	1.32919	41.03	13.01	1.82	1218.8	1265.6
1301	11_Mc18_Lq16	1	N	2	1	40	1	1	1	437	20	F	English	Y	cats, dogs	12	NA	Y	38	33		NA	40	NA	0.642857	0.333333	0.564103	RMc18	RLq16	RMc18_2342.wav	0.616	781.2	1456.5	675.3	1260.1	202.73	781	1378	0.32	0.519481	2110.94	-265.203	3.7e-05	1.32919	41.03	13.01	1.82	1218.8	1265.6
1302	11_Mc18_Lq16	40	N	2	2	19	1	1	1	616	19	F	Chinese	N			NA	N	39	39		NA	NA	NA	0.666667	0.515152	0.512821	RMc18	RLq16	RMc18_2342.wav	0.616	781.2	1456.5	675.3	1260.1	202.73	781	1378	0.32	0.519481	2110.94	-265.203	3.7e-05	1.32919	41.03	13.01	1.82	1218.8	1265.6
1303	11_Mc18_Lq16	16	N	2	1	37	1	1	1	959	21	F	English	Y	dogs, cats	6	NA	Y	44	43		38	40	78	0.559524	0.545455	0.461538	RMc18	RLq16	RMc18_2342.wav	0.616	781.2	1456.5	675.3	1260.1	202.73	781	1378	0.32	0.519481	2110.94	-265.203	3.7e-05	1.32919	41.03	13.01	1.82	1218.8	1265.6
1304	11_Mc18_Lq16	114	N	2	1	29	1	1	1	961	19	M	English	N			NA	Y	58	35		36	38	74	0.607143	0.393939	0.512821	RMc18	RLq16	RMc18_2342.wav	0.616	781.2	1456.5	675.3	1260.1	202.73	781	1378	0.32	0.519481	2110.94	-265.203	3.7e-05	1.32919	41.03	13.01	1.82	1218.8	1265.6
1305	11_Mc18_Lq16	93	N	2	1	39	1	1	1	323	19	F	English	N			NA	Y	53	37		38	38	76	0.52381	0.30303	0.487179	RMc18	RLq16	RMc18_2342.wav	0.616	781.2	1456.5	675.3	1260.1	202.73	781	1378	0.32	0.519481	2110.94	-265.203	3.7e-05	1.32919	41.03	13.01	1.82	1218.8	1265.6
1306	11_Mc18_Lq16	7	N	2	1	10	1	1	1	441	21	F	English	N			NA	Y	49	33		44	43	87	0.583333	0.363636	0.615385	RMc18	RLq16	RMc18_2342.wav	0.616	781.2	1456.5	675.3	1260.1	202.73	781	1378	0.32	0.519481	2110.94	-265.203	3.7e-05	1.32919	41.03	13.01	1.82	1218.8	1265.6
1307	11_Mc18_Lq16	19	N	2	3	3	1	1	1	487	51	F	English	Y	mice	240	NA	Y	36	29		43	47	90	0.511905	0.575758	0.487179	RMc18	RLq16	RMc18_2342.wav	0.616	781.2	1456.5	675.3	1260.1	202.73	781	1378	0.32	0.519481	2110.94	-265.203	3.7e-05	1.32919	41.03	13.01	1.82	1218.8	1265.6
1308	11_Mc18_Lq16	15	N	2	4	18	1	0	2	2220	20	F	English and Chinese	N			NA	Y	58	36	didn't make it to face - just voice	NA	36	NA	0.488095	0.393939	0.461538	RMc18	RLq16	RMc18_2342.wav	0.616	781.2	1456.5	675.3	1260.1	202.73	781	1378	0.32	0.519481	2110.94	-265.203	3.7e-05	1.32919	41.03	13.01	1.82	1218.8	1265.6
1309	11_Mc18_Lq16	20	Y	2	2	42	1	0	2	272	37	F	English	Y	Rhesus, chimpanzees, dogs, cats, mice, rats	180	132	Y	52	33		46	47	93	0.392857	0.454545	0.589744	RMc18	RLq16	RMc18_2342.wav	0.616	781.2	1456.5	675.3	1260.1	202.73	781	1378	0.32	0.519481	2110.94	-265.203	3.7e-05	1.32919	41.03	13.01	1.82	1218.8	1265.6
1310	11_Mc18_Lq16	501	Y	2	4	3	1	1	1	102	26	M	English	Y	lemurs (black white ruffed, ringtail, red bellied, crown, mongoose), Rhesus monkeys, gorillas, orangutans	Lemur: 24, Rh: 48, Gorilla: 12, Orangutan: 12	48	Y	47	37		46	44	90	0.559524	0.69697	0.461538	RMc18	RLq16	RMc18_2342.wav	0.616	781.2	1456.5	675.3	1260.1	202.73	781	1378	0.32	0.519481	2110.94	-265.203	3.7e-05	1.32919	41.03	13.01	1.82	1218.8	1265.6
1311	11_Mc18_Lq16	54	N	2	1	27	1	1	1	295	18	F	Chinese	N			NA	N	35	41		NA	NA	NA	0.535714	0.424242	0.538462	RMc18	RLq16	RMc18_2342.wav	0.616	781.2	1456.5	675.3	1260.1	202.73	781	1378	0.32	0.519481	2110.94	-265.203	3.7e-05	1.32919	41.03	13.01	1.82	1218.8	1265.6
1312	11_Mc18_Lq16	86	N	2	1	13	1	1	1	375	22	M	Chinese	N			NA	Y	44	35		NA	NA	NA	0.666667	0.515152	0.641026	RMc18	RLq16	RMc18_2342.wav	0.616	781.2	1456.5	675.3	1260.1	202.73	781	1378	0.32	0.519481	2110.94	-265.203	3.7e-05	1.32919	41.03	13.01	1.82	1218.8	1265.6
1313	11_Mc18_Lq16	74	N	2	4	35	1	0	2	305	19	F	English	Y	cats, dogs	1	NA	Y	47	41		41	43	84	0.428571	0.272727	0.538462	RMc18	RLq16	RMc18_2342.wav	0.616	781.2	1456.5	675.3	1260.1	202.73	781	1378	0.32	0.519481	2110.94	-265.203	3.7e-05	1.32919	41.03	13.01	1.82	1218.8	1265.6
1314	11_Mc18_Lq16	77	N	2	3	1	1	0	2	1145	19	M	Chinese	N			NA	Y	46	18		NA	NA	NA	0.595238	0.454545	0.538462	RMc18	RLq16	RMc18_2342.wav	0.616	781.2	1456.5	675.3	1260.1	202.73	781	1378	0.32	0.519481	2110.94	-265.203	3.7e-05	1.32919	41.03	13.01	1.82	1218.8	1265.6
1315	11_Mc18_Lq16	89	N	2	1	9	1	1	1	148	18	F	Spanish	N			NA	Y	50	37		NA	NA	NA	0.619048	0.818182	0.589744	RMc18	RLq16	RMc18_2342.wav	0.616	781.2	1456.5	675.3	1260.1	202.73	781	1378	0.32	0.519481	2110.94	-265.203	3.7e-05	1.32919	41.03	13.01	1.82	1218.8	1265.6
1316	11_Mc18_Lq16	508	Y	2	2	33	1	1	1	72	40	F	English	Y	Rhesus macaque, pigtail macaque, sooty mangabey	192	120	Y	NA	NA		NA	NA	NA	0.511905	0.969697	0.641026	RMc18	RLq16	RMc18_2342.wav	0.616	781.2	1456.5	675.3	1260.1	202.73	781	1378	0.32	0.519481	2110.94	-265.203	3.7e-05	1.32919	41.03	13.01	1.82	1218.8	1265.6
1317	11_Mc18_Lq16	95	N	2	2	30	1	1	1	400	20	F	English	N			NA	Y	57	30		39	44	83	0.571429	0.363636	0.564103	RMc18	RLq16	RMc18_2342.wav	0.616	781.2	1456.5	675.3	1260.1	202.73	781	1378	0.32	0.519481	2110.94	-265.203	3.7e-05	1.32919	41.03	13.01	1.82	1218.8	1265.6
1318	11_Mc18_Lq16	30	N	2	1	35	1	1	1	283	19	F	Chinese	N			NA	N	43	31		NA	NA	NA	0.535714	0.151515	0.641026	RMc18	RLq16	RMc18_2342.wav	0.616	781.2	1456.5	675.3	1260.1	202.73	781	1378	0.32	0.519481	2110.94	-265.203	3.7e-05	1.32919	41.03	13.01	1.82	1218.8	1265.6
1319	11_Mc18_Lq16	91	N	2	1	1	1	1	1	346	20	F	Chinese	N			NA	N	49	36		NA	NA	NA	0.547619	0.606061	0.641026	RMc18	RLq16	RMc18_2342.wav	0.616	781.2	1456.5	675.3	1260.1	202.73	781	1378	0.32	0.519481	2110.94	-265.203	3.7e-05	1.32919	41.03	13.01	1.82	1218.8	1265.6
1320	11_Mc18_Lq16	12	N	2	4	1	1	1	1	908	21	M	Chinese	N			NA	Y	41	34		NA	NA	NA	0.642857	0.484848	0.410256	RMc18	RLq16	RMc18_2342.wav	0.616	781.2	1456.5	675.3	1260.1	202.73	781	1378	0.32	0.519481	2110.94	-265.203	3.7e-05	1.32919	41.03	13.01	1.82	1218.8	1265.6
1321	11_Mc18_Lq16	58	N	2	1	24	1	1	1	312	21	F	Spanish	Y	mice, rats	2	NA	Y	53	33		NA	NA	NA	0.547619	0.515152	0.461538	RMc18	RLq16	RMc18_2342.wav	0.616	781.2	1456.5	675.3	1260.1	202.73	781	1378	0.32	0.519481	2110.94	-265.203	3.7e-05	1.32919	41.03	13.01	1.82	1218.8	1265.6
1322	11_Mc18_Lq16	41	N	2	4	33	1	1	1	275	20	M	Vietnamese	N			NA	Y	45	29		NA	NA	NA	0.630952	0.454545	0.435897	RMc18	RLq16	RMc18_2342.wav	0.616	781.2	1456.5	675.3	1260.1	202.73	781	1378	0.32	0.519481	2110.94	-265.203	3.7e-05	1.32919	41.03	13.01	1.82	1218.8	1265.6
1323	11_Mc18_Lq16	97	N	2	4	33	1	1	1	2038	19	F	English	N			NA	Y	48	28		40	43	83	0.595238	0.606061	0.487179	RMc18	RLq16	RMc18_2342.wav	0.616	781.2	1456.5	675.3	1260.1	202.73	781	1378	0.32	0.519481	2110.94	-265.203	3.7e-05	1.32919	41.03	13.01	1.82	1218.8	1265.6
1324	11_Mc18_Lq16	11	N	2	4	6	1	1	1	246	20	F	English (mainly) + Hindi	Y	dogs	6	NA	Y	66	45	noted w/ regard to coos that it is upsetting - sounds like they're in pain. Noted surpirse that screams would be more intense context than coos	34	41	75	0.666667	0.545455	0.641026	RMc18	RLq16	RMc18_2342.wav	0.616	781.2	1456.5	675.3	1260.1	202.73	781	1378	0.32	0.519481	2110.94	-265.203	3.7e-05	1.32919	41.03	13.01	1.82	1218.8	1265.6
1325	11_Mc18_Lq16	109	N	2	3	36	1	1	1	298	20	F	English	N			NA	Y	41	33		45	43	88	0.666667	0.727273	0.384615	RMc18	RLq16	RMc18_2342.wav	0.616	781.2	1456.5	675.3	1260.1	202.73	781	1378	0.32	0.519481	2110.94	-265.203	3.7e-05	1.32919	41.03	13.01	1.82	1218.8	1265.6
1326	11_Mc18_Lq16	18	N	2	2	12	1	1	1	1227	20	F	English	N			NA	Y	44	35		32	42	74	0.571429	0.151515	0.333333	RMc18	RLq16	RMc18_2342.wav	0.616	781.2	1456.5	675.3	1260.1	202.73	781	1378	0.32	0.519481	2110.94	-265.203	3.7e-05	1.32919	41.03	13.01	1.82	1218.8	1265.6
1327	11_Mc18_Lq16	14	N	2	1	40	1	1	1	259	19	M	English and Mandarin	N			NA	N	43	35		32	39	71	0.642857	0.818182	0.615385	RMc18	RLq16	RMc18_2342.wav	0.616	781.2	1456.5	675.3	1260.1	202.73	781	1378	0.32	0.519481	2110.94	-265.203	3.7e-05	1.32919	41.03	13.01	1.82	1218.8	1265.6
1328	11_Mc18_Lq16	502	Y	2	1	16	1	1	1	946	39	F	English	Y	Rhesus, pigrails, gorillas, orangutans, lemurs	216	204	Y	63	30		45	43	88	0.642857	0.909091	0.666667	RMc18	RLq16	RMc18_2342.wav	0.616	781.2	1456.5	675.3	1260.1	202.73	781	1378	0.32	0.519481	2110.94	-265.203	3.7e-05	1.32919	41.03	13.01	1.82	1218.8	1265.6
1329	11_Mc18_Lq16	72	N	2	3	30	1	1	1	1004	19	F	English	N			NA	Y	48	33		35	31	66	0.511905	0.69697	0.538462	RMc18	RLq16	RMc18_2342.wav	0.616	781.2	1456.5	675.3	1260.1	202.73	781	1378	0.32	0.519481	2110.94	-265.203	3.7e-05	1.32919	41.03	13.01	1.82	1218.8	1265.6
1330	11_Mc18_Lq16	92	N	2	2	14	1	1	1	315	18	F	English	N			NA	Y	45	30		36	36	72	0.595238	0.212121	0.589744	RMc18	RLq16	RMc18_2342.wav	0.616	781.2	1456.5	675.3	1260.1	202.73	781	1378	0.32	0.519481	2110.94	-265.203	3.7e-05	1.32919	41.03	13.01	1.82	1218.8	1265.6
1331	11_Mc18_Lq16	64	N	2	4	33	1	1	1	498	18	F	English	N			NA	N	55	36		40	42	82	0.654762	0.393939	0.666667	RMc18	RLq16	RMc18_2342.wav	0.616	781.2	1456.5	675.3	1260.1	202.73	781	1378	0.32	0.519481	2110.94	-265.203	3.7e-05	1.32919	41.03	13.01	1.82	1218.8	1265.6
1332	11_Mc18_Lq16	57	N	2	4	37	1	0	2	218	20	F	English	N			NA	N	29	31		27	41	68	0.547619	0.333333	0.538462	RMc18	RLq16	RMc18_2342.wav	0.616	781.2	1456.5	675.3	1260.1	202.73	781	1378	0.32	0.519481	2110.94	-265.203	3.7e-05	1.32919	41.03	13.01	1.82	1218.8	1265.6
1333	11_Mc18_Lq16	2	N	2	3	25	1	1	1	357	19	F	English	N			NA	Y	49	42		36	37	73	0.595238	0.0606061	0.641026	RMc18	RLq16	RMc18_2342.wav	0.616	781.2	1456.5	675.3	1260.1	202.73	781	1378	0.32	0.519481	2110.94	-265.203	3.7e-05	1.32919	41.03	13.01	1.82	1218.8	1265.6
1334	11_Mc18_Lq16	27	N	2	4	7	1	1	1	821	23	F	Telugu	N			NA	N	32	44		NA	NA	NA	0.547619	0.151515	0.512821	RMc18	RLq16	RMc18_2342.wav	0.616	781.2	1456.5	675.3	1260.1	202.73	781	1378	0.32	0.519481	2110.94	-265.203	3.7e-05	1.32919	41.03	13.01	1.82	1218.8	1265.6
1335	11_Mc18_Lq16	33	N	2	2	31	1	1	1	427	19	F	Mandarin + English	N			NA	Y	56	33		NA	NA	NA	0.571429	0.272727	0.615385	RMc18	RLq16	RMc18_2342.wav	0.616	781.2	1456.5	675.3	1260.1	202.73	781	1378	0.32	0.519481	2110.94	-265.203	3.7e-05	1.32919	41.03	13.01	1.82	1218.8	1265.6
1336	11_Mc18_Lq16	60	N	2	2	31	1	1	1	329	18	F	Chinese	N			NA	Y	54	33		NA	NA	NA	0.595238	0.69697	0.615385	RMc18	RLq16	RMc18_2342.wav	0.616	781.2	1456.5	675.3	1260.1	202.73	781	1378	0.32	0.519481	2110.94	-265.203	3.7e-05	1.32919	41.03	13.01	1.82	1218.8	1265.6
1337	11_Mc18_Lq16	22	N	2	1	24	1	0	2	1880	31	F	English	Y	dogs, cats	6	NA	Y	56	49		47	46	93	0.452381	0.515152	0.692308	RMc18	RLq16	RMc18_2342.wav	0.616	781.2	1456.5	675.3	1260.1	202.73	781	1378	0.32	0.519481	2110.94	-265.203	3.7e-05	1.32919	41.03	13.01	1.82	1218.8	1265.6
1338	11_Mc18_Lq16	31	N	2	4	28	1	1	1	655	18	F	English	N			NA	Y	47	35		38	40	78	0.583333	0.575758	0.384615	RMc18	RLq16	RMc18_2342.wav	0.616	781.2	1456.5	675.3	1260.1	202.73	781	1378	0.32	0.519481	2110.94	-265.203	3.7e-05	1.32919	41.03	13.01	1.82	1218.8	1265.6
1339	11_Mc18_Lq16	49	N	2	4	17	1	1	1	281	18	F	English	N			NA	N	44	28		42	2	44	0.642857	0.454545	0.487179	RMc18	RLq16	RMc18_2342.wav	0.616	781.2	1456.5	675.3	1260.1	202.73	781	1378	0.32	0.519481	2110.94	-265.203	3.7e-05	1.32919	41.03	13.01	1.82	1218.8	1265.6
1340	11_Mc18_Lq16	32	N	2	1	39	1	1	1	809	23	F	English	N			NA	N	58	26		34	33	67	0.559524	0.424242	0.435897	RMc18	RLq16	RMc18_2342.wav	0.616	781.2	1456.5	675.3	1260.1	202.73	781	1378	0.32	0.519481	2110.94	-265.203	3.7e-05	1.32919	41.03	13.01	1.82	1218.8	1265.6
1341	11_Mc18_Lq16	3	N	2	2	5	1	1	1	806	28	M	English	N			NA	Y	39	30		45	42	87	0.559524	0.575758	0.487179	RMc18	RLq16	RMc18_2342.wav	0.616	781.2	1456.5	675.3	1260.1	202.73	781	1378	0.32	0.519481	2110.94	-265.203	3.7e-05	1.32919	41.03	13.01	1.82	1218.8	1265.6
1342	11_Mc18_Lq16	88	N	2	1	10	1	1	1	251	19	M	Mandarin	N			NA	Y	49	27		NA	NA	NA	0.547619	0.818182	0.538462	RMc18	RLq16	RMc18_2342.wav	0.616	781.2	1456.5	675.3	1260.1	202.73	781	1378	0.32	0.519481	2110.94	-265.203	3.7e-05	1.32919	41.03	13.01	1.82	1218.8	1265.6
1343	11_Mc18_Lq16	46	N	2	3	2	1	1	1	307	18	F	English	N			NA	Y	45	25		39	42	81	0.619048	0.515152	0.589744	RMc18	RLq16	RMc18_2342.wav	0.616	781.2	1456.5	675.3	1260.1	202.73	781	1378	0.32	0.519481	2110.94	-265.203	3.7e-05	1.32919	41.03	13.01	1.82	1218.8	1265.6
1344	11_Mc18_Lq16	55	N	2	4	31	1	1	1	583	18	F	Mandarin	N			NA	Y	64	30		NA	NA	NA	0.690476	0.515152	0.410256	RMc18	RLq16	RMc18_2342.wav	0.616	781.2	1456.5	675.3	1260.1	202.73	781	1378	0.32	0.519481	2110.94	-265.203	3.7e-05	1.32919	41.03	13.01	1.82	1218.8	1265.6
1345	11_Mc18_Lq16	99	N	2	1	5	1	1	1	192	19	F	English + Hindi	N			NA	Y	56	37		37	39	76	0.595238	0.30303	0.461538	RMc18	RLq16	RMc18_2342.wav	0.616	781.2	1456.5	675.3	1260.1	202.73	781	1378	0.32	0.519481	2110.94	-265.203	3.7e-05	1.32919	41.03	13.01	1.82	1218.8	1265.6
1346	11_Mc18_Lq16	35	N	2	1	21	1	1	1	634	19	M	English	N			NA	N	40	21		44	39	83	0.666667	0.818182	0.641026	RMc18	RLq16	RMc18_2342.wav	0.616	781.2	1456.5	675.3	1260.1	202.73	781	1378	0.32	0.519481	2110.94	-265.203	3.7e-05	1.32919	41.03	13.01	1.82	1218.8	1265.6
1347	11_Mc18_Lq16	94	N	2	2	38	1	1	1	293	20	F	English	N			NA	Y	45	44		40	44	84	0.72619	0.878788	0.410256	RMc18	RLq16	RMc18_2342.wav	0.616	781.2	1456.5	675.3	1260.1	202.73	781	1378	0.32	0.519481	2110.94	-265.203	3.7e-05	1.32919	41.03	13.01	1.82	1218.8	1265.6
1348	11_Mc18_Lq16	69	N	2	2	30	1	1	1	455	20	F	English	N			NA	Y	40	37		42	43	85	0.547619	0.424242	0.615385	RMc18	RLq16	RMc18_2342.wav	0.616	781.2	1456.5	675.3	1260.1	202.73	781	1378	0.32	0.519481	2110.94	-265.203	3.7e-05	1.32919	41.03	13.01	1.82	1218.8	1265.6
1349	11_Mc18_Lq16	87	N	2	4	4	1	1	1	290	19	F	Korean	N			NA	Y	53	41		NA	NA	NA	0.654762	0.787879	0.615385	RMc18	RLq16	RMc18_2342.wav	0.616	781.2	1456.5	675.3	1260.1	202.73	781	1378	0.32	0.519481	2110.94	-265.203	3.7e-05	1.32919	41.03	13.01	1.82	1218.8	1265.6
1350	11_Mc18_Lq16	81	N	2	4	36	1	1	1	259	18	F	English	N			NA	Y	53	33		43	51	94	0.690476	0.454545	0.538462	RMc18	RLq16	RMc18_2342.wav	0.616	781.2	1456.5	675.3	1260.1	202.73	781	1378	0.32	0.519481	2110.94	-265.203	3.7e-05	1.32919	41.03	13.01	1.82	1218.8	1265.6
1351	11_Mc18_Lq16	48	N	2	1	28	1	1	1	5482	19	F	English	N			NA	Y	33	36		36	46	82	0.654762	0.606061	0.564103	RMc18	RLq16	RMc18_2342.wav	0.616	781.2	1456.5	675.3	1260.1	202.73	781	1378	0.32	0.519481	2110.94	-265.203	3.7e-05	1.32919	41.03	13.01	1.82	1218.8	1265.6
1352	11_Mc18_Lq16	513	Y	2	1	37	1	1	1	318	53	F	English	Y	chimps, bonobos, Rhesus macaque, Sooty mangabeys, pigtail macaque, gibbons, orangutan, stumptail macaques, baboons	288	288	Y	NA	NA		NA	NA	NA	0.535714	0.969697	0.589744	RMc18	RLq16	RMc18_2342.wav	0.616	781.2	1456.5	675.3	1260.1	202.73	781	1378	0.32	0.519481	2110.94	-265.203	3.7e-05	1.32919	41.03	13.01	1.82	1218.8	1265.6
1353	11_Mc18_Lq16	509	Y	2	1	14	1	1	1	549	28	M	Spanish/English	Y	Rhesus macaque, mangabey	48	48	Y	NA	NA		NA	NA	NA	0.464286	0.969697	0.615385	RMc18	RLq16	RMc18_2342.wav	0.616	781.2	1456.5	675.3	1260.1	202.73	781	1378	0.32	0.519481	2110.94	-265.203	3.7e-05	1.32919	41.03	13.01	1.82	1218.8	1265.6
1354	11_Mc18_Lq16	47	N	2	3	9	1	1	1	257	18	F	English	N			NA	Y	60	42		42	45	87	0.47619	0.30303	0.333333	RMc18	RLq16	RMc18_2342.wav	0.616	781.2	1456.5	675.3	1260.1	202.73	781	1378	0.32	0.519481	2110.94	-265.203	3.7e-05	1.32919	41.03	13.01	1.82	1218.8	1265.6
1355	11_Mc18_Lq16	115	N	2	4	21	1	0	2	2703	18	M	Mandarin	N			NA	N	31	37		NA	NA	NA	0.583333	0.575758	0.461538	RMc18	RLq16	RMc18_2342.wav	0.616	781.2	1456.5	675.3	1260.1	202.73	781	1378	0.32	0.519481	2110.94	-265.203	3.7e-05	1.32919	41.03	13.01	1.82	1218.8	1265.6
1356	11_Mc18_Lq16	34	N	2	3	5	1	1	1	451	24	M	Mandarin	N			NA	N	15	37		NA	NA	NA	0.511905	0.757576	0.282051	RMc18	RLq16	RMc18_2342.wav	0.616	781.2	1456.5	675.3	1260.1	202.73	781	1378	0.32	0.519481	2110.94	-265.203	3.7e-05	1.32919	41.03	13.01	1.82	1218.8	1265.6
1357	11_Mc18_Lq16	65	N	2	2	13	1	1	1	688	20	F	Arabic	Y			NA	N	36	35		NA	NA	NA	0.559524	0.363636	0.564103	RMc18	RLq16	RMc18_2342.wav	0.616	781.2	1456.5	675.3	1260.1	202.73	781	1378	0.32	0.519481	2110.94	-265.203	3.7e-05	1.32919	41.03	13.01	1.82	1218.8	1265.6
1358	11_Mc18_Lq16	59	N	2	1	16	1	1	1	220	18	M	Gujarati	N			NA	N	37	38		NA	NA	NA	0.52381	0.393939	0.666667	RMc18	RLq16	RMc18_2342.wav	0.616	781.2	1456.5	675.3	1260.1	202.73	781	1378	0.32	0.519481	2110.94	-265.203	3.7e-05	1.32919	41.03	13.01	1.82	1218.8	1265.6
1359	11_Mc18_Lq16	112	N	2	2	4	1	1	1	434	18	M	Turkish	N			NA	Y	55	40		NA	NA	NA	0.535714	0.424242	0.461538	RMc18	RLq16	RMc18_2342.wav	0.616	781.2	1456.5	675.3	1260.1	202.73	781	1378	0.32	0.519481	2110.94	-265.203	3.7e-05	1.32919	41.03	13.01	1.82	1218.8	1265.6
1360	11_Mc18_Lq16	103	N	2	4	10	1	1	1	273	19	F	Korean + English	Y	dogs, cats	3	NA	Y	47	39		40	41	81	0.52381	0.393939	0.512821	RMc18	RLq16	RMc18_2342.wav	0.616	781.2	1456.5	675.3	1260.1	202.73	781	1378	0.32	0.519481	2110.94	-265.203	3.7e-05	1.32919	41.03	13.01	1.82	1218.8	1265.6
1361	11_Mc18_Lq16	23	N	2	3	20	1	1	1	486	20	F	Mandarin	N			NA	N	38	33		NA	NA	NA	0.52381	0.575758	0.564103	RMc18	RLq16	RMc18_2342.wav	0.616	781.2	1456.5	675.3	1260.1	202.73	781	1378	0.32	0.519481	2110.94	-265.203	3.7e-05	1.32919	41.03	13.01	1.82	1218.8	1265.6
1362	11_Mc18_Lq16	70	N	2	3	30	1	1	1	280	18	F	English	N			NA	Y	62	34		48	45	93	0.52381	0.242424	0.384615	RMc18	RLq16	RMc18_2342.wav	0.616	781.2	1456.5	675.3	1260.1	202.73	781	1378	0.32	0.519481	2110.94	-265.203	3.7e-05	1.32919	41.03	13.01	1.82	1218.8	1265.6
1363	11_Mc18_Lq16	82	N	2	2	32	1	1	1	462	18	F	Korean	Y	dogs, cats	3	NA	Y	31	40		NA	NA	NA	0.559524	0.333333	0.641026	RMc18	RLq16	RMc18_2342.wav	0.616	781.2	1456.5	675.3	1260.1	202.73	781	1378	0.32	0.519481	2110.94	-265.203	3.7e-05	1.32919	41.03	13.01	1.82	1218.8	1265.6
1364	11_Mc18_Lq16	9	N	2	1	28	1	1	1	702	19	M	English	Y	dogs, cats	3	NA	Y	41	31		35	32	67	0.416667	0.121212	0.435897	RMc18	RLq16	RMc18_2342.wav	0.616	781.2	1456.5	675.3	1260.1	202.73	781	1378	0.32	0.519481	2110.94	-265.203	3.7e-05	1.32919	41.03	13.01	1.82	1218.8	1265.6
1365	11_Mc18_Lq16	25	N	2	3	40	1	1	1	234	21	M	English	N			NA	N	56	32		34	41	75	0.5	0.575758	0.461538	RMc18	RLq16	RMc18_2342.wav	0.616	781.2	1456.5	675.3	1260.1	202.73	781	1378	0.32	0.519481	2110.94	-265.203	3.7e-05	1.32919	41.03	13.01	1.82	1218.8	1265.6
1366	11_Mc18_Lq16	506	Y	2	2	21	1	1	1	450	37	F	English	Y	Rhesus macaque	120	120	Y	NA	NA		NA	NA	NA	0.559524	0.424242	0.487179	RMc18	RLq16	RMc18_2342.wav	0.616	781.2	1456.5	675.3	1260.1	202.73	781	1378	0.32	0.519481	2110.94	-265.203	3.7e-05	1.32919	41.03	13.01	1.82	1218.8	1265.6
1367	11_Mc18_Lq16	85	N	2	1	28	1	1	1	372	19	F	Chinese	N			NA	Y	25	32		NA	NA	NA	0.571429	0.363636	0.435897	RMc18	RLq16	RMc18_2342.wav	0.616	781.2	1456.5	675.3	1260.1	202.73	781	1378	0.32	0.519481	2110.94	-265.203	3.7e-05	1.32919	41.03	13.01	1.82	1218.8	1265.6
1368	11_Mc18_Lq16	44	N	2	1	17	1	1	1	860	31	F	English	N			NA	Y	39	34		47	45	92	0.571429	0.606061	0.333333	RMc18	RLq16	RMc18_2342.wav	0.616	781.2	1456.5	675.3	1260.1	202.73	781	1378	0.32	0.519481	2110.94	-265.203	3.7e-05	1.32919	41.03	13.01	1.82	1218.8	1265.6
1369	11_Mc18_Lq16	13	N	2	4	42	1	1	1	772	19	F	English	N			NA	N	21	34		42	41	83	0.5	0.666667	0.487179	RMc18	RLq16	RMc18_2342.wav	0.616	781.2	1456.5	675.3	1260.1	202.73	781	1378	0.32	0.519481	2110.94	-265.203	3.7e-05	1.32919	41.03	13.01	1.82	1218.8	1265.6
1370	11_Mc18_Lq16	78	N	2	2	24	1	1	1	1874	20	M	Spanish	Y	dogs, snakes	2	NA	Y	45	35		NA	NA	NA	0.547619	0.424242	0.487179	RMc18	RLq16	RMc18_2342.wav	0.616	781.2	1456.5	675.3	1260.1	202.73	781	1378	0.32	0.519481	2110.94	-265.203	3.7e-05	1.32919	41.03	13.01	1.82	1218.8	1265.6
1371	11_Mc18_Lq16	10	N	2	3	18	1	1	1	1404	21	F	English	N			NA	Y	50	38		36	38	74	0.559524	0.757576	0.358974	RMc18	RLq16	RMc18_2342.wav	0.616	781.2	1456.5	675.3	1260.1	202.73	781	1378	0.32	0.519481	2110.94	-265.203	3.7e-05	1.32919	41.03	13.01	1.82	1218.8	1265.6
1372	11_Mc18_Lq16	61	N	2	4	35	1	1	1	328	19	M	English	N			NA	Y	42	36		43	35	78	0.619048	0.424242	0.461538	RMc18	RLq16	RMc18_2342.wav	0.616	781.2	1456.5	675.3	1260.1	202.73	781	1378	0.32	0.519481	2110.94	-265.203	3.7e-05	1.32919	41.03	13.01	1.82	1218.8	1265.6
1373	11_Mc18_Lq16	52	N	2	2	34	1	1	1	294	19	F	English	N			NA	Y	55	38		42	43	85	0.619048	0.393939	0.512821	RMc18	RLq16	RMc18_2342.wav	0.616	781.2	1456.5	675.3	1260.1	202.73	781	1378	0.32	0.519481	2110.94	-265.203	3.7e-05	1.32919	41.03	13.01	1.82	1218.8	1265.6
1374	11_Mc18_Lq16	507	Y	2	1	15	1	1	1	90	27	F	English	Y	Rhesus macaque, tufted capuchins	60	48	Y	NA	NA		NA	NA	NA	0.547619	1	0.666667	RMc18	RLq16	RMc18_2342.wav	0.616	781.2	1456.5	675.3	1260.1	202.73	781	1378	0.32	0.519481	2110.94	-265.203	3.7e-05	1.32919	41.03	13.01	1.82	1218.8	1265.6
1375	11_Mc18_Lq16	105	N	2	2	23	1	0	2	607	19	F	English	N			NA	Y	44	36		40	42	82	0.571429	0.606061	0.435897	RMc18	RLq16	RMc18_2342.wav	0.616	781.2	1456.5	675.3	1260.1	202.73	781	1378	0.32	0.519481	2110.94	-265.203	3.7e-05	1.32919	41.03	13.01	1.82	1218.8	1265.6
1376	12_Sr17_Mc18	97	N	2	4	15	2	1	2	210	19	F	English	N			NA	Y	48	28		40	43	83	0.595238	0.606061	0.487179	RMc18	RSr17	RSr17_2250.wav	0.755	762.6	1141	378.4	1013.3	116.67	762	982	0.2	0.264901	1895	-286.486	8.57e-05	1.37717	18.1	11.76	2.82	1031.2	1125
1377	12_Sr17_Mc18	30	N	2	1	20	2	1	2	3265	19	F	Chinese	N			NA	N	43	31		NA	NA	NA	0.535714	0.151515	0.641026	RMc18	RSr17	RSr17_2250.wav	0.755	762.6	1141	378.4	1013.3	116.67	762	982	0.2	0.264901	1895	-286.486	8.57e-05	1.37717	18.1	11.76	2.82	1031.2	1125
1378	12_Sr17_Mc18	52	N	2	2	3	2	1	2	280	19	F	English	N			NA	Y	55	38		42	43	85	0.619048	0.393939	0.512821	RMc18	RSr17	RSr17_2250.wav	0.755	762.6	1141	378.4	1013.3	116.67	762	982	0.2	0.264901	1895	-286.486	8.57e-05	1.37717	18.1	11.76	2.82	1031.2	1125
1379	12_Sr17_Mc18	107	N	2	4	23	2	1	2	320	22	F	Chinese	N			NA	N	21	37		NA	NA	NA	0.595238	0.424242	0.435897	RMc18	RSr17	RSr17_2250.wav	0.755	762.6	1141	378.4	1013.3	116.67	762	982	0.2	0.264901	1895	-286.486	8.57e-05	1.37717	18.1	11.76	2.82	1031.2	1125
1380	12_Sr17_Mc18	24	N	2	2	1	2	1	2	564	20	M	English	N			NA	N	41	24		35	36	71	0.404762	0.363636	0.666667	RMc18	RSr17	RSr17_2250.wav	0.755	762.6	1141	378.4	1013.3	116.67	762	982	0.2	0.264901	1895	-286.486	8.57e-05	1.37717	18.1	11.76	2.82	1031.2	1125
1381	12_Sr17_Mc18	79	N	2	1	41	2	1	2	168	21	M	English	N			NA	Y	55	38		33	34	67	0.571429	0.393939	0.564103	RMc18	RSr17	RSr17_2250.wav	0.755	762.6	1141	378.4	1013.3	116.67	762	982	0.2	0.264901	1895	-286.486	8.57e-05	1.37717	18.1	11.76	2.82	1031.2	1125
1382	12_Sr17_Mc18	91	N	2	1	8	2	0	1	352	20	F	Chinese	N			NA	N	49	36		NA	NA	NA	0.547619	0.606061	0.641026	RMc18	RSr17	RSr17_2250.wav	0.755	762.6	1141	378.4	1013.3	116.67	762	982	0.2	0.264901	1895	-286.486	8.57e-05	1.37717	18.1	11.76	2.82	1031.2	1125
1383	12_Sr17_Mc18	3	N	2	2	16	2	0	1	1049	28	M	English	N			NA	Y	39	30		45	42	87	0.559524	0.575758	0.487179	RMc18	RSr17	RSr17_2250.wav	0.755	762.6	1141	378.4	1013.3	116.67	762	982	0.2	0.264901	1895	-286.486	8.57e-05	1.37717	18.1	11.76	2.82	1031.2	1125
1384	12_Sr17_Mc18	101	N	2	4	3	2	1	2	343	19	F	English	Y	mice	11	NA	Y	50	40		43	43	86	0.690476	0.484848	0.487179	RMc18	RSr17	RSr17_2250.wav	0.755	762.6	1141	378.4	1013.3	116.67	762	982	0.2	0.264901	1895	-286.486	8.57e-05	1.37717	18.1	11.76	2.82	1031.2	1125
1385	12_Sr17_Mc18	53	N	2	1	39	2	1	2	233	18	F	English	N			NA	N	71	47		22	17	39	0.642857	0.787879	0.641026	RMc18	RSr17	RSr17_2250.wav	0.755	762.6	1141	378.4	1013.3	116.67	762	982	0.2	0.264901	1895	-286.486	8.57e-05	1.37717	18.1	11.76	2.82	1031.2	1125
1386	12_Sr17_Mc18	60	N	2	2	5	2	1	2	333	18	F	Chinese	N			NA	Y	54	33		NA	NA	NA	0.595238	0.69697	0.615385	RMc18	RSr17	RSr17_2250.wav	0.755	762.6	1141	378.4	1013.3	116.67	762	982	0.2	0.264901	1895	-286.486	8.57e-05	1.37717	18.1	11.76	2.82	1031.2	1125
1387	12_Sr17_Mc18	36	N	2	3	5	2	1	2	300	19	F	English	Y	dogs, cats	4	NA	Y	53	31		42	42	84	0.416667	0.606061	0.435897	RMc18	RSr17	RSr17_2250.wav	0.755	762.6	1141	378.4	1013.3	116.67	762	982	0.2	0.264901	1895	-286.486	8.57e-05	1.37717	18.1	11.76	2.82	1031.2	1125
1388	12_Sr17_Mc18	23	N	2	3	2	2	1	2	317	20	F	Mandarin	N			NA	N	38	33		NA	NA	NA	0.52381	0.575758	0.564103	RMc18	RSr17	RSr17_2250.wav	0.755	762.6	1141	378.4	1013.3	116.67	762	982	0.2	0.264901	1895	-286.486	8.57e-05	1.37717	18.1	11.76	2.82	1031.2	1125
1389	12_Sr17_Mc18	75	N	2	2	38	2	1	2	928	19	M	Chinese	Y	fruitfly, termites	1.5	NA	N	58	38		NA	NA	NA	0.547619	0.484848	0.461538	RMc18	RSr17	RSr17_2250.wav	0.755	762.6	1141	378.4	1013.3	116.67	762	982	0.2	0.264901	1895	-286.486	8.57e-05	1.37717	18.1	11.76	2.82	1031.2	1125
1390	12_Sr17_Mc18	22	N	2	1	5	2	1	2	766	31	F	English	Y	dogs, cats	6	NA	Y	56	49		47	46	93	0.452381	0.515152	0.692308	RMc18	RSr17	RSr17_2250.wav	0.755	762.6	1141	378.4	1013.3	116.67	762	982	0.2	0.264901	1895	-286.486	8.57e-05	1.37717	18.1	11.76	2.82	1031.2	1125
1391	12_Sr17_Mc18	73	N	2	1	15	2	1	2	252	19	F	English and Chinese	N			NA	Y	41	37		34	36	70	0.571429	0.575758	0.538462	RMc18	RSr17	RSr17_2250.wav	0.755	762.6	1141	378.4	1013.3	116.67	762	982	0.2	0.264901	1895	-286.486	8.57e-05	1.37717	18.1	11.76	2.82	1031.2	1125
1392	12_Sr17_Mc18	114	N	2	1	13	2	0	1	1458	19	M	English	N			NA	Y	58	35		36	38	74	0.607143	0.393939	0.512821	RMc18	RSr17	RSr17_2250.wav	0.755	762.6	1141	378.4	1013.3	116.67	762	982	0.2	0.264901	1895	-286.486	8.57e-05	1.37717	18.1	11.76	2.82	1031.2	1125
1393	12_Sr17_Mc18	50	N	2	4	4	2	0	1	295	19	F	English	Y	dogs, cats	12	NA	Y	53	40		24	19	43	0.5	0.212121	0.512821	RMc18	RSr17	RSr17_2250.wav	0.755	762.6	1141	378.4	1013.3	116.67	762	982	0.2	0.264901	1895	-286.486	8.57e-05	1.37717	18.1	11.76	2.82	1031.2	1125
1394	12_Sr17_Mc18	108	N	2	2	33	2	1	2	578	19	M	English	N			NA	N	59	24		45	43	88	0.571429	0.393939	0.435897	RMc18	RSr17	RSr17_2250.wav	0.755	762.6	1141	378.4	1013.3	116.67	762	982	0.2	0.264901	1895	-286.486	8.57e-05	1.37717	18.1	11.76	2.82	1031.2	1125
1395	12_Sr17_Mc18	8	N	2	1	32	2	1	2	445	19	F	English	Y	dogs, cats	24	NA	Y	58	40		39	43	82	0.595238	0.363636	0.589744	RMc18	RSr17	RSr17_2250.wav	0.755	762.6	1141	378.4	1013.3	116.67	762	982	0.2	0.264901	1895	-286.486	8.57e-05	1.37717	18.1	11.76	2.82	1031.2	1125
1396	12_Sr17_Mc18	86	N	2	1	8	2	1	2	181	22	M	Chinese	N			NA	Y	44	35		NA	NA	NA	0.666667	0.515152	0.641026	RMc18	RSr17	RSr17_2250.wav	0.755	762.6	1141	378.4	1013.3	116.67	762	982	0.2	0.264901	1895	-286.486	8.57e-05	1.37717	18.1	11.76	2.82	1031.2	1125
1397	12_Sr17_Mc18	14	N	2	1	25	2	1	2	339	19	M	English and Mandarin	N			NA	N	43	35		32	39	71	0.642857	0.818182	0.615385	RMc18	RSr17	RSr17_2250.wav	0.755	762.6	1141	378.4	1013.3	116.67	762	982	0.2	0.264901	1895	-286.486	8.57e-05	1.37717	18.1	11.76	2.82	1031.2	1125
1398	12_Sr17_Mc18	19	N	2	3	35	2	1	2	487	51	F	English	Y	mice	240	NA	Y	36	29		43	47	90	0.511905	0.575758	0.487179	RMc18	RSr17	RSr17_2250.wav	0.755	762.6	1141	378.4	1013.3	116.67	762	982	0.2	0.264901	1895	-286.486	8.57e-05	1.37717	18.1	11.76	2.82	1031.2	1125
1399	12_Sr17_Mc18	43	N	2	3	23	2	1	2	409	19	M	English	N			NA	Y	37	39		36	40	76	0.595238	0.666667	0.589744	RMc18	RSr17	RSr17_2250.wav	0.755	762.6	1141	378.4	1013.3	116.67	762	982	0.2	0.264901	1895	-286.486	8.57e-05	1.37717	18.1	11.76	2.82	1031.2	1125
1400	12_Sr17_Mc18	66	N	2	2	1	2	1	2	1019	20	M	Chinese	N			NA	N	41	38		NA	NA	NA	0.47619	0.69697	0.512821	RMc18	RSr17	RSr17_2250.wav	0.755	762.6	1141	378.4	1013.3	116.67	762	982	0.2	0.264901	1895	-286.486	8.57e-05	1.37717	18.1	11.76	2.82	1031.2	1125
1401	12_Sr17_Mc18	46	N	2	3	5	2	1	2	270	18	F	English	N			NA	Y	45	25		39	42	81	0.619048	0.515152	0.589744	RMc18	RSr17	RSr17_2250.wav	0.755	762.6	1141	378.4	1013.3	116.67	762	982	0.2	0.264901	1895	-286.486	8.57e-05	1.37717	18.1	11.76	2.82	1031.2	1125
1402	12_Sr17_Mc18	115	N	2	4	36	2	1	2	289	18	M	Mandarin	N			NA	N	31	37		NA	NA	NA	0.583333	0.575758	0.461538	RMc18	RSr17	RSr17_2250.wav	0.755	762.6	1141	378.4	1013.3	116.67	762	982	0.2	0.264901	1895	-286.486	8.57e-05	1.37717	18.1	11.76	2.82	1031.2	1125
1403	12_Sr17_Mc18	54	N	2	1	31	2	1	2	149	18	F	Chinese	N			NA	N	35	41		NA	NA	NA	0.535714	0.424242	0.538462	RMc18	RSr17	RSr17_2250.wav	0.755	762.6	1141	378.4	1013.3	116.67	762	982	0.2	0.264901	1895	-286.486	8.57e-05	1.37717	18.1	11.76	2.82	1031.2	1125
1404	12_Sr17_Mc18	89	N	2	1	1	2	0	1	124	18	F	Spanish	N			NA	Y	50	37		NA	NA	NA	0.619048	0.818182	0.589744	RMc18	RSr17	RSr17_2250.wav	0.755	762.6	1141	378.4	1013.3	116.67	762	982	0.2	0.264901	1895	-286.486	8.57e-05	1.37717	18.1	11.76	2.82	1031.2	1125
1405	12_Sr17_Mc18	10	N	2	3	37	2	0	1	2109	21	F	English	N			NA	Y	50	38		36	38	74	0.559524	0.757576	0.358974	RMc18	RSr17	RSr17_2250.wav	0.755	762.6	1141	378.4	1013.3	116.67	762	982	0.2	0.264901	1895	-286.486	8.57e-05	1.37717	18.1	11.76	2.82	1031.2	1125
1406	12_Sr17_Mc18	58	N	2	1	5	2	1	2	3198	21	F	Spanish	Y	mice, rats	2	NA	Y	53	33		NA	NA	NA	0.547619	0.515152	0.461538	RMc18	RSr17	RSr17_2250.wav	0.755	762.6	1141	378.4	1013.3	116.67	762	982	0.2	0.264901	1895	-286.486	8.57e-05	1.37717	18.1	11.76	2.82	1031.2	1125
1407	12_Sr17_Mc18	6	N	2	1	10	2	1	2	424	23	M	English	Y	mice	3	NA	Y	31	28		38	41	79	0.595238	0.484848	0.589744	RMc18	RSr17	RSr17_2250.wav	0.755	762.6	1141	378.4	1013.3	116.67	762	982	0.2	0.264901	1895	-286.486	8.57e-05	1.37717	18.1	11.76	2.82	1031.2	1125
1408	12_Sr17_Mc18	92	N	2	2	8	2	0	1	493	18	F	English	N			NA	Y	45	30		36	36	72	0.595238	0.212121	0.589744	RMc18	RSr17	RSr17_2250.wav	0.755	762.6	1141	378.4	1013.3	116.67	762	982	0.2	0.264901	1895	-286.486	8.57e-05	1.37717	18.1	11.76	2.82	1031.2	1125
1409	12_Sr17_Mc18	13	N	2	4	32	2	1	2	634	19	F	English	N			NA	N	21	34		42	41	83	0.5	0.666667	0.487179	RMc18	RSr17	RSr17_2250.wav	0.755	762.6	1141	378.4	1013.3	116.67	762	982	0.2	0.264901	1895	-286.486	8.57e-05	1.37717	18.1	11.76	2.82	1031.2	1125
1410	12_Sr17_Mc18	85	N	2	1	18	2	1	2	231	19	F	Chinese	N			NA	Y	25	32		NA	NA	NA	0.571429	0.363636	0.435897	RMc18	RSr17	RSr17_2250.wav	0.755	762.6	1141	378.4	1013.3	116.67	762	982	0.2	0.264901	1895	-286.486	8.57e-05	1.37717	18.1	11.76	2.82	1031.2	1125
1411	12_Sr17_Mc18	82	N	2	2	26	2	1	2	171	18	F	Korean	Y	dogs, cats	3	NA	Y	31	40		NA	NA	NA	0.559524	0.333333	0.641026	RMc18	RSr17	RSr17_2250.wav	0.755	762.6	1141	378.4	1013.3	116.67	762	982	0.2	0.264901	1895	-286.486	8.57e-05	1.37717	18.1	11.76	2.82	1031.2	1125
1412	12_Sr17_Mc18	9	N	2	1	39	2	1	2	550	19	M	English	Y	dogs, cats	3	NA	Y	41	31		35	32	67	0.416667	0.121212	0.435897	RMc18	RSr17	RSr17_2250.wav	0.755	762.6	1141	378.4	1013.3	116.67	762	982	0.2	0.264901	1895	-286.486	8.57e-05	1.37717	18.1	11.76	2.82	1031.2	1125
1413	12_Sr17_Mc18	55	N	2	4	29	2	1	2	195	18	F	Mandarin	N			NA	Y	64	30		NA	NA	NA	0.690476	0.515152	0.410256	RMc18	RSr17	RSr17_2250.wav	0.755	762.6	1141	378.4	1013.3	116.67	762	982	0.2	0.264901	1895	-286.486	8.57e-05	1.37717	18.1	11.76	2.82	1031.2	1125
1414	12_Sr17_Mc18	112	N	2	2	26	2	1	2	218	18	M	Turkish	N			NA	Y	55	40		NA	NA	NA	0.535714	0.424242	0.461538	RMc18	RSr17	RSr17_2250.wav	0.755	762.6	1141	378.4	1013.3	116.67	762	982	0.2	0.264901	1895	-286.486	8.57e-05	1.37717	18.1	11.76	2.82	1031.2	1125
1415	12_Sr17_Mc18	512	Y	2	2	16	2	0	1	339	39	M	English	Y	Rhesus macaque, pigtail macaque, common chimpanzee, west lowland gorilla, Sooty mangabey	144	144	Y	NA	NA	occasionally needed to answer radio during task	NA	NA	NA	0.642857	1	0.589744	RMc18	RSr17	RSr17_2250.wav	0.755	762.6	1141	378.4	1013.3	116.67	762	982	0.2	0.264901	1895	-286.486	8.57e-05	1.37717	18.1	11.76	2.82	1031.2	1125
1416	12_Sr17_Mc18	39	N	2	3	3	2	1	2	852	19	F	Spanish/English	N			NA	Y	55	38		41	43	84	0.583333	0.454545	0.538462	RMc18	RSr17	RSr17_2250.wav	0.755	762.6	1141	378.4	1013.3	116.67	762	982	0.2	0.264901	1895	-286.486	8.57e-05	1.37717	18.1	11.76	2.82	1031.2	1125
1417	12_Sr17_Mc18	21	N	2	1	3	2	1	2	288	20	F	English	Y	dogs	6	NA	Y	44	37		41	34	75	0.630952	0.787879	0.384615	RMc18	RSr17	RSr17_2250.wav	0.755	762.6	1141	378.4	1013.3	116.67	762	982	0.2	0.264901	1895	-286.486	8.57e-05	1.37717	18.1	11.76	2.82	1031.2	1125
1418	12_Sr17_Mc18	102	N	2	1	20	2	1	2	230	18	F	English	Y	elephants, dogs, tortoises	3	NA	Y	46	44		33	36	69	0.559524	0.424242	0.461538	RMc18	RSr17	RSr17_2250.wav	0.755	762.6	1141	378.4	1013.3	116.67	762	982	0.2	0.264901	1895	-286.486	8.57e-05	1.37717	18.1	11.76	2.82	1031.2	1125
1419	12_Sr17_Mc18	4	N	2	3	15	2	1	2	184	20	M	English	N			NA	N	43	38		27	24	51	0.559524	0.424242	0.589744	RMc18	RSr17	RSr17_2250.wav	0.755	762.6	1141	378.4	1013.3	116.67	762	982	0.2	0.264901	1895	-286.486	8.57e-05	1.37717	18.1	11.76	2.82	1031.2	1125
1420	12_Sr17_Mc18	34	N	2	3	32	2	1	2	414	24	M	Mandarin	N			NA	N	15	37		NA	NA	NA	0.511905	0.757576	0.282051	RMc18	RSr17	RSr17_2250.wav	0.755	762.6	1141	378.4	1013.3	116.67	762	982	0.2	0.264901	1895	-286.486	8.57e-05	1.37717	18.1	11.76	2.82	1031.2	1125
1421	12_Sr17_Mc18	70	N	2	3	4	2	0	1	38	18	F	English	N			NA	Y	62	34		48	45	93	0.52381	0.242424	0.384615	RMc18	RSr17	RSr17_2250.wav	0.755	762.6	1141	378.4	1013.3	116.67	762	982	0.2	0.264901	1895	-286.486	8.57e-05	1.37717	18.1	11.76	2.82	1031.2	1125
1422	12_Sr17_Mc18	84	N	2	3	9	2	1	2	256	19	F	English	N			NA	Y	34	36		35	37	72	0.547619	0.575758	0.512821	RMc18	RSr17	RSr17_2250.wav	0.755	762.6	1141	378.4	1013.3	116.67	762	982	0.2	0.264901	1895	-286.486	8.57e-05	1.37717	18.1	11.76	2.82	1031.2	1125
1423	12_Sr17_Mc18	42	N	2	2	10	2	1	2	209	19	F	English	N			NA	N	35	28		44	44	88	0.571429	0.454545	0.692308	RMc18	RSr17	RSr17_2250.wav	0.755	762.6	1141	378.4	1013.3	116.67	762	982	0.2	0.264901	1895	-286.486	8.57e-05	1.37717	18.1	11.76	2.82	1031.2	1125
1424	12_Sr17_Mc18	88	N	2	1	35	2	0	1	188	19	M	Mandarin	N			NA	Y	49	27		NA	NA	NA	0.547619	0.818182	0.538462	RMc18	RSr17	RSr17_2250.wav	0.755	762.6	1141	378.4	1013.3	116.67	762	982	0.2	0.264901	1895	-286.486	8.57e-05	1.37717	18.1	11.76	2.82	1031.2	1125
1425	12_Sr17_Mc18	76	N	2	4	20	2	1	2	159	19	F	Chinese	N			NA	Y	41	41		NA	NA	NA	0.630952	0.393939	0.538462	RMc18	RSr17	RSr17_2250.wav	0.755	762.6	1141	378.4	1013.3	116.67	762	982	0.2	0.264901	1895	-286.486	8.57e-05	1.37717	18.1	11.76	2.82	1031.2	1125
1426	12_Sr17_Mc18	35	N	2	1	9	2	1	2	439	19	M	English	N			NA	N	40	21		44	39	83	0.666667	0.818182	0.641026	RMc18	RSr17	RSr17_2250.wav	0.755	762.6	1141	378.4	1013.3	116.67	762	982	0.2	0.264901	1895	-286.486	8.57e-05	1.37717	18.1	11.76	2.82	1031.2	1125
1427	12_Sr17_Mc18	80	N	2	4	14	2	1	2	315	18	F	English	N			NA	Y	57	34		36	3	39	0.607143	0.545455	0.358974	RMc18	RSr17	RSr17_2250.wav	0.755	762.6	1141	378.4	1013.3	116.67	762	982	0.2	0.264901	1895	-286.486	8.57e-05	1.37717	18.1	11.76	2.82	1031.2	1125
1428	12_Sr17_Mc18	96	N	2	1	33	2	1	2	398	18	F	English	N			NA	Y	59	39		44	47	91	0.583333	0.727273	0.512821	RMc18	RSr17	RSr17_2250.wav	0.755	762.6	1141	378.4	1013.3	116.67	762	982	0.2	0.264901	1895	-286.486	8.57e-05	1.37717	18.1	11.76	2.82	1031.2	1125
1429	12_Sr17_Mc18	1	N	2	1	25	2	1	2	441	20	F	English	Y	cats, dogs	12	NA	Y	38	33		NA	40	NA	0.642857	0.333333	0.564103	RMc18	RSr17	RSr17_2250.wav	0.755	762.6	1141	378.4	1013.3	116.67	762	982	0.2	0.264901	1895	-286.486	8.57e-05	1.37717	18.1	11.76	2.82	1031.2	1125
1430	12_Sr17_Mc18	513	Y	2	1	23	2	1	2	116	53	F	English	Y	chimps, bonobos, Rhesus macaque, Sooty mangabeys, pigtail macaque, gibbons, orangutan, stumptail macaques, baboons	288	288	Y	NA	NA		NA	NA	NA	0.535714	0.969697	0.589744	RMc18	RSr17	RSr17_2250.wav	0.755	762.6	1141	378.4	1013.3	116.67	762	982	0.2	0.264901	1895	-286.486	8.57e-05	1.37717	18.1	11.76	2.82	1031.2	1125
1431	12_Sr17_Mc18	505	Y	2	2	36	2	0	1	3734	30	F	English	Y	Rhesus macaque, horses, dogs, cats, birds, mangabey	120	94	Y	NA	NA		NA	NA	NA	0.595238	1	0.589744	RMc18	RSr17	RSr17_2250.wav	0.755	762.6	1141	378.4	1013.3	116.67	762	982	0.2	0.264901	1895	-286.486	8.57e-05	1.37717	18.1	11.76	2.82	1031.2	1125
1432	12_Sr17_Mc18	56	N	2	2	35	2	1	2	237	18	F	Chinese	N			NA	Y	31	30		NA	NA	NA	0.595238	0.575758	0.384615	RMc18	RSr17	RSr17_2250.wav	0.755	762.6	1141	378.4	1013.3	116.67	762	982	0.2	0.264901	1895	-286.486	8.57e-05	1.37717	18.1	11.76	2.82	1031.2	1125
1433	12_Sr17_Mc18	7	N	2	1	36	2	1	2	1663	21	F	English	N			NA	Y	49	33		44	43	87	0.583333	0.363636	0.615385	RMc18	RSr17	RSr17_2250.wav	0.755	762.6	1141	378.4	1013.3	116.67	762	982	0.2	0.264901	1895	-286.486	8.57e-05	1.37717	18.1	11.76	2.82	1031.2	1125
1434	12_Sr17_Mc18	26	N	2	1	24	2	1	2	403	24	M	Telugu	N			NA	N	41	35		NA	NA	NA	0.607143	0.515152	0.538462	RMc18	RSr17	RSr17_2250.wav	0.755	762.6	1141	378.4	1013.3	116.67	762	982	0.2	0.264901	1895	-286.486	8.57e-05	1.37717	18.1	11.76	2.82	1031.2	1125
1435	12_Sr17_Mc18	29	N	2	1	35	2	1	2	429	19	F	English	Y	dogs, cats	3	NA	Y	63	44		47	41	88	0.547619	0.454545	0.512821	RMc18	RSr17	RSr17_2250.wav	0.755	762.6	1141	378.4	1013.3	116.67	762	982	0.2	0.264901	1895	-286.486	8.57e-05	1.37717	18.1	11.76	2.82	1031.2	1125
1436	12_Sr17_Mc18	18	N	2	2	27	2	1	2	441	20	F	English	N			NA	Y	44	35		32	42	74	0.571429	0.151515	0.333333	RMc18	RSr17	RSr17_2250.wav	0.755	762.6	1141	378.4	1013.3	116.67	762	982	0.2	0.264901	1895	-286.486	8.57e-05	1.37717	18.1	11.76	2.82	1031.2	1125
1437	12_Sr17_Mc18	15	N	2	4	27	2	1	2	561	20	F	English and Chinese	N			NA	Y	58	36	didn't make it to face - just voice	NA	36	NA	0.488095	0.393939	0.461538	RMc18	RSr17	RSr17_2250.wav	0.755	762.6	1141	378.4	1013.3	116.67	762	982	0.2	0.264901	1895	-286.486	8.57e-05	1.37717	18.1	11.76	2.82	1031.2	1125
1438	12_Sr17_Mc18	5	N	2	3	23	2	1	2	361	29	F	English	Y	cat, dog, horse, cow	6+ years	NA	Y	41	35		46	49	95	0.583333	0.393939	0.564103	RMc18	RSr17	RSr17_2250.wav	0.755	762.6	1141	378.4	1013.3	116.67	762	982	0.2	0.264901	1895	-286.486	8.57e-05	1.37717	18.1	11.76	2.82	1031.2	1125
1439	12_Sr17_Mc18	72	N	2	3	28	2	0	1	10453	19	F	English	N			NA	Y	48	33		35	31	66	0.511905	0.69697	0.538462	RMc18	RSr17	RSr17_2250.wav	0.755	762.6	1141	378.4	1013.3	116.67	762	982	0.2	0.264901	1895	-286.486	8.57e-05	1.37717	18.1	11.76	2.82	1031.2	1125
1440	12_Sr17_Mc18	90	N	2	3	4	2	1	2	222	21	M	English	N			NA	N	43	24		42	42	84	0.52381	0.69697	0.641026	RMc18	RSr17	RSr17_2250.wav	0.755	762.6	1141	378.4	1013.3	116.67	762	982	0.2	0.264901	1895	-286.486	8.57e-05	1.37717	18.1	11.76	2.82	1031.2	1125
1441	12_Sr17_Mc18	64	N	2	4	23	2	1	2	3095	18	F	English	N			NA	N	55	36		40	42	82	0.654762	0.393939	0.666667	RMc18	RSr17	RSr17_2250.wav	0.755	762.6	1141	378.4	1013.3	116.67	762	982	0.2	0.264901	1895	-286.486	8.57e-05	1.37717	18.1	11.76	2.82	1031.2	1125
1442	12_Sr17_Mc18	83	N	2	3	23	2	1	2	369	19	F	English	N			NA	Y	55	46		48	46	94	0.5	0.333333	0.487179	RMc18	RSr17	RSr17_2250.wav	0.755	762.6	1141	378.4	1013.3	116.67	762	982	0.2	0.264901	1895	-286.486	8.57e-05	1.37717	18.1	11.76	2.82	1031.2	1125
1443	12_Sr17_Mc18	78	N	2	2	32	2	1	2	5	20	M	Spanish	Y	dogs, snakes	2	NA	Y	45	35		NA	NA	NA	0.547619	0.424242	0.487179	RMc18	RSr17	RSr17_2250.wav	0.755	762.6	1141	378.4	1013.3	116.67	762	982	0.2	0.264901	1895	-286.486	8.57e-05	1.37717	18.1	11.76	2.82	1031.2	1125
1444	12_Sr17_Mc18	71	N	2	2	17	2	1	2	153	19	M	English	N			NA	Y	44	36		43	43	86	0.595238	0.424242	0.333333	RMc18	RSr17	RSr17_2250.wav	0.755	762.6	1141	378.4	1013.3	116.67	762	982	0.2	0.264901	1895	-286.486	8.57e-05	1.37717	18.1	11.76	2.82	1031.2	1125
1445	12_Sr17_Mc18	57	N	2	4	6	2	1	2	491	20	F	English	N			NA	N	29	31		27	41	68	0.547619	0.333333	0.538462	RMc18	RSr17	RSr17_2250.wav	0.755	762.6	1141	378.4	1013.3	116.67	762	982	0.2	0.264901	1895	-286.486	8.57e-05	1.37717	18.1	11.76	2.82	1031.2	1125
1446	12_Sr17_Mc18	74	N	2	4	32	2	1	2	367	19	F	English	Y	cats, dogs	1	NA	Y	47	41		41	43	84	0.428571	0.272727	0.538462	RMc18	RSr17	RSr17_2250.wav	0.755	762.6	1141	378.4	1013.3	116.67	762	982	0.2	0.264901	1895	-286.486	8.57e-05	1.37717	18.1	11.76	2.82	1031.2	1125
1447	12_Sr17_Mc18	113	N	2	3	21	2	1	2	2725	18	F	English	N			NA	Y	52	38		47	41	88	0.583333	0.848485	0.564103	RMc18	RSr17	RSr17_2250.wav	0.755	762.6	1141	378.4	1013.3	116.67	762	982	0.2	0.264901	1895	-286.486	8.57e-05	1.37717	18.1	11.76	2.82	1031.2	1125
1448	12_Sr17_Mc18	47	N	2	3	39	2	1	2	267	18	F	English	N			NA	Y	60	42		42	45	87	0.47619	0.30303	0.333333	RMc18	RSr17	RSr17_2250.wav	0.755	762.6	1141	378.4	1013.3	116.67	762	982	0.2	0.264901	1895	-286.486	8.57e-05	1.37717	18.1	11.76	2.82	1031.2	1125
1449	12_Sr17_Mc18	67	N	2	3	18	2	1	2	6	18	F	English	N			NA	N	29	44		32	32	64	0.75	0.636364	0.564103	RMc18	RSr17	RSr17_2250.wav	0.755	762.6	1141	378.4	1013.3	116.67	762	982	0.2	0.264901	1895	-286.486	8.57e-05	1.37717	18.1	11.76	2.82	1031.2	1125
1450	12_Sr17_Mc18	502	Y	2	1	15	2	1	2	663	39	F	English	Y	Rhesus, pigrails, gorillas, orangutans, lemurs	216	204	Y	63	30		45	43	88	0.642857	0.909091	0.666667	RMc18	RSr17	RSr17_2250.wav	0.755	762.6	1141	378.4	1013.3	116.67	762	982	0.2	0.264901	1895	-286.486	8.57e-05	1.37717	18.1	11.76	2.82	1031.2	1125
1451	12_Sr17_Mc18	28	N	2	2	35	2	1	2	961	40	F	English	N			NA	Y	50	33		42	NA	NA	0.630952	0.606061	0.564103	RMc18	RSr17	RSr17_2250.wav	0.755	762.6	1141	378.4	1013.3	116.67	762	982	0.2	0.264901	1895	-286.486	8.57e-05	1.37717	18.1	11.76	2.82	1031.2	1125
1452	12_Sr17_Mc18	65	N	2	2	36	2	1	2	1212	20	F	Arabic	Y			NA	N	36	35		NA	NA	NA	0.559524	0.363636	0.564103	RMc18	RSr17	RSr17_2250.wav	0.755	762.6	1141	378.4	1013.3	116.67	762	982	0.2	0.264901	1895	-286.486	8.57e-05	1.37717	18.1	11.76	2.82	1031.2	1125
1453	12_Sr17_Mc18	104	N	2	1	12	2	1	2	807	19	F	Bangla	N			NA	N	49	31		NA	NA	NA	0.619048	0.363636	0.384615	RMc18	RSr17	RSr17_2250.wav	0.755	762.6	1141	378.4	1013.3	116.67	762	982	0.2	0.264901	1895	-286.486	8.57e-05	1.37717	18.1	11.76	2.82	1031.2	1125
1454	12_Sr17_Mc18	511	Y	2	1	13	2	1	2	469	24	F	English	Y	Rhesus macaque, domestic cats	24	24	Y	NA	NA		NA	NA	NA	0.571429	0.69697	0.512821	RMc18	RSr17	RSr17_2250.wav	0.755	762.6	1141	378.4	1013.3	116.67	762	982	0.2	0.264901	1895	-286.486	8.57e-05	1.37717	18.1	11.76	2.82	1031.2	1125
1455	12_Sr17_Mc18	95	N	2	2	7	2	1	2	1335	20	F	English	N			NA	Y	57	30		39	44	83	0.571429	0.363636	0.564103	RMc18	RSr17	RSr17_2250.wav	0.755	762.6	1141	378.4	1013.3	116.67	762	982	0.2	0.264901	1895	-286.486	8.57e-05	1.37717	18.1	11.76	2.82	1031.2	1125
1456	12_Sr17_Mc18	109	N	2	3	1	2	1	2	250	20	F	English	N			NA	Y	41	33		45	43	88	0.666667	0.727273	0.384615	RMc18	RSr17	RSr17_2250.wav	0.755	762.6	1141	378.4	1013.3	116.67	762	982	0.2	0.264901	1895	-286.486	8.57e-05	1.37717	18.1	11.76	2.82	1031.2	1125
1457	12_Sr17_Mc18	509	Y	2	1	10	2	1	2	337	28	M	Spanish/English	Y	Rhesus macaque, mangabey	48	48	Y	NA	NA		NA	NA	NA	0.464286	0.969697	0.615385	RMc18	RSr17	RSr17_2250.wav	0.755	762.6	1141	378.4	1013.3	116.67	762	982	0.2	0.264901	1895	-286.486	8.57e-05	1.37717	18.1	11.76	2.82	1031.2	1125
1458	12_Sr17_Mc18	25	N	2	3	24	2	1	2	220	21	M	English	N			NA	N	56	32		34	41	75	0.5	0.575758	0.461538	RMc18	RSr17	RSr17_2250.wav	0.755	762.6	1141	378.4	1013.3	116.67	762	982	0.2	0.264901	1895	-286.486	8.57e-05	1.37717	18.1	11.76	2.82	1031.2	1125
1459	12_Sr17_Mc18	98	N	2	4	12	2	1	2	264	18	F	English	N			NA	Y	36	39		37	48	85	0.690476	0.393939	0.538462	RMc18	RSr17	RSr17_2250.wav	0.755	762.6	1141	378.4	1013.3	116.67	762	982	0.2	0.264901	1895	-286.486	8.57e-05	1.37717	18.1	11.76	2.82	1031.2	1125
1460	12_Sr17_Mc18	506	Y	2	2	20	2	0	1	705	37	F	English	Y	Rhesus macaque	120	120	Y	NA	NA		NA	NA	NA	0.559524	0.424242	0.487179	RMc18	RSr17	RSr17_2250.wav	0.755	762.6	1141	378.4	1013.3	116.67	762	982	0.2	0.264901	1895	-286.486	8.57e-05	1.37717	18.1	11.76	2.82	1031.2	1125
1461	12_Sr17_Mc18	20	Y	2	2	39	2	1	2	326	37	F	English	Y	Rhesus, chimpanzees, dogs, cats, mice, rats	180	132	Y	52	33		46	47	93	0.392857	0.454545	0.589744	RMc18	RSr17	RSr17_2250.wav	0.755	762.6	1141	378.4	1013.3	116.67	762	982	0.2	0.264901	1895	-286.486	8.57e-05	1.37717	18.1	11.76	2.82	1031.2	1125
1462	12_Sr17_Mc18	69	N	2	2	37	2	1	2	631	20	F	English	N			NA	Y	40	37		42	43	85	0.547619	0.424242	0.615385	RMc18	RSr17	RSr17_2250.wav	0.755	762.6	1141	378.4	1013.3	116.67	762	982	0.2	0.264901	1895	-286.486	8.57e-05	1.37717	18.1	11.76	2.82	1031.2	1125
1463	12_Sr17_Mc18	12	N	2	4	13	2	0	1	903	21	M	Chinese	N			NA	Y	41	34		NA	NA	NA	0.642857	0.484848	0.410256	RMc18	RSr17	RSr17_2250.wav	0.755	762.6	1141	378.4	1013.3	116.67	762	982	0.2	0.264901	1895	-286.486	8.57e-05	1.37717	18.1	11.76	2.82	1031.2	1125
1464	12_Sr17_Mc18	110	N	2	1	32	2	0	1	507	19	M	English	N			NA	Y	40	32		35	38	73	0.511905	0.69697	0.564103	RMc18	RSr17	RSr17_2250.wav	0.755	762.6	1141	378.4	1013.3	116.67	762	982	0.2	0.264901	1895	-286.486	8.57e-05	1.37717	18.1	11.76	2.82	1031.2	1125
1465	12_Sr17_Mc18	501	Y	2	4	25	2	1	2	99	26	M	English	Y	lemurs (black white ruffed, ringtail, red bellied, crown, mongoose), Rhesus monkeys, gorillas, orangutans	Lemur: 24, Rh: 48, Gorilla: 12, Orangutan: 12	48	Y	47	37		46	44	90	0.559524	0.69697	0.461538	RMc18	RSr17	RSr17_2250.wav	0.755	762.6	1141	378.4	1013.3	116.67	762	982	0.2	0.264901	1895	-286.486	8.57e-05	1.37717	18.1	11.76	2.82	1031.2	1125
1466	12_Sr17_Mc18	17	N	2	2	8	2	1	2	874	19	F	Chinese	N			NA	Y	49	34		NA	NA	NA	0.595238	1	0.487179	RMc18	RSr17	RSr17_2250.wav	0.755	762.6	1141	378.4	1013.3	116.67	762	982	0.2	0.264901	1895	-286.486	8.57e-05	1.37717	18.1	11.76	2.82	1031.2	1125
1467	12_Sr17_Mc18	103	N	2	4	17	2	1	2	219	19	F	Korean + English	Y	dogs, cats	3	NA	Y	47	39		40	41	81	0.52381	0.393939	0.512821	RMc18	RSr17	RSr17_2250.wav	0.755	762.6	1141	378.4	1013.3	116.67	762	982	0.2	0.264901	1895	-286.486	8.57e-05	1.37717	18.1	11.76	2.82	1031.2	1125
1468	12_Sr17_Mc18	508	Y	2	2	22	2	1	2	436	40	F	English	Y	Rhesus macaque, pigtail macaque, sooty mangabey	192	120	Y	NA	NA		NA	NA	NA	0.511905	0.969697	0.641026	RMc18	RSr17	RSr17_2250.wav	0.755	762.6	1141	378.4	1013.3	116.67	762	982	0.2	0.264901	1895	-286.486	8.57e-05	1.37717	18.1	11.76	2.82	1031.2	1125
1469	12_Sr17_Mc18	16	N	2	1	12	2	1	2	171	21	F	English	Y	dogs, cats	6	NA	Y	44	43		38	40	78	0.559524	0.545455	0.461538	RMc18	RSr17	RSr17_2250.wav	0.755	762.6	1141	378.4	1013.3	116.67	762	982	0.2	0.264901	1895	-286.486	8.57e-05	1.37717	18.1	11.76	2.82	1031.2	1125
1470	12_Sr17_Mc18	77	N	2	3	20	2	1	2	92	19	M	Chinese	N			NA	Y	46	18		NA	NA	NA	0.595238	0.454545	0.538462	RMc18	RSr17	RSr17_2250.wav	0.755	762.6	1141	378.4	1013.3	116.67	762	982	0.2	0.264901	1895	-286.486	8.57e-05	1.37717	18.1	11.76	2.82	1031.2	1125
1471	12_Sr17_Mc18	40	N	2	2	12	2	1	2	313	19	F	Chinese	N			NA	N	39	39		NA	NA	NA	0.666667	0.515152	0.512821	RMc18	RSr17	RSr17_2250.wav	0.755	762.6	1141	378.4	1013.3	116.67	762	982	0.2	0.264901	1895	-286.486	8.57e-05	1.37717	18.1	11.76	2.82	1031.2	1125
1472	12_Sr17_Mc18	100	N	2	3	30	2	1	2	342	21	F	Mandarin	N			NA	Y	50	36		NA	NA	NA	0.619048	0.424242	0.641026	RMc18	RSr17	RSr17_2250.wav	0.755	762.6	1141	378.4	1013.3	116.67	762	982	0.2	0.264901	1895	-286.486	8.57e-05	1.37717	18.1	11.76	2.82	1031.2	1125
1473	12_Sr17_Mc18	68	N	2	2	20	2	1	2	597	19	M	Spanish	N			NA	N	48	NA	didn't fill out this questionnaire animal	NA	NA	NA	0.607143	0.333333	0.641026	RMc18	RSr17	RSr17_2250.wav	0.755	762.6	1141	378.4	1013.3	116.67	762	982	0.2	0.264901	1895	-286.486	8.57e-05	1.37717	18.1	11.76	2.82	1031.2	1125
1474	12_Sr17_Mc18	44	N	2	1	35	2	1	2	541	31	F	English	N			NA	Y	39	34		47	45	92	0.571429	0.606061	0.333333	RMc18	RSr17	RSr17_2250.wav	0.755	762.6	1141	378.4	1013.3	116.67	762	982	0.2	0.264901	1895	-286.486	8.57e-05	1.37717	18.1	11.76	2.82	1031.2	1125
1475	12_Sr17_Mc18	38	N	2	4	11	2	1	2	144	18	F	English	N			NA	Y	57	36		41	41	82	0.619048	0.606061	0.615385	RMc18	RSr17	RSr17_2250.wav	0.755	762.6	1141	378.4	1013.3	116.67	762	982	0.2	0.264901	1895	-286.486	8.57e-05	1.37717	18.1	11.76	2.82	1031.2	1125
1476	12_Sr17_Mc18	27	N	2	4	21	2	1	2	538	23	F	Telugu	N			NA	N	32	44		NA	NA	NA	0.547619	0.151515	0.512821	RMc18	RSr17	RSr17_2250.wav	0.755	762.6	1141	378.4	1013.3	116.67	762	982	0.2	0.264901	1895	-286.486	8.57e-05	1.37717	18.1	11.76	2.82	1031.2	1125
1477	12_Sr17_Mc18	510	Y	2	1	34	2	1	2	430	30	M	English	Y	Rhesus macaque, Sooty mangabey	60	60	Y	NA	NA	asked for more clarification on "intense emotion" ~3 min into task	NA	NA	NA	0.511905	0.727273	0.717949	RMc18	RSr17	RSr17_2250.wav	0.755	762.6	1141	378.4	1013.3	116.67	762	982	0.2	0.264901	1895	-286.486	8.57e-05	1.37717	18.1	11.76	2.82	1031.2	1125
1478	12_Sr17_Mc18	87	N	2	4	2	2	1	2	102	19	F	Korean	N			NA	Y	53	41		NA	NA	NA	0.654762	0.787879	0.615385	RMc18	RSr17	RSr17_2250.wav	0.755	762.6	1141	378.4	1013.3	116.67	762	982	0.2	0.264901	1895	-286.486	8.57e-05	1.37717	18.1	11.76	2.82	1031.2	1125
1479	12_Sr17_Mc18	41	N	2	4	2	2	1	2	61	20	M	Vietnamese	N			NA	Y	45	29		NA	NA	NA	0.630952	0.454545	0.435897	RMc18	RSr17	RSr17_2250.wav	0.755	762.6	1141	378.4	1013.3	116.67	762	982	0.2	0.264901	1895	-286.486	8.57e-05	1.37717	18.1	11.76	2.82	1031.2	1125
1480	12_Sr17_Mc18	33	N	2	2	21	2	1	2	204	19	F	Mandarin + English	N			NA	Y	56	33		NA	NA	NA	0.571429	0.272727	0.615385	RMc18	RSr17	RSr17_2250.wav	0.755	762.6	1141	378.4	1013.3	116.67	762	982	0.2	0.264901	1895	-286.486	8.57e-05	1.37717	18.1	11.76	2.82	1031.2	1125
1481	12_Sr17_Mc18	11	N	2	4	13	2	1	2	437	20	F	English (mainly) + Hindi	Y	dogs	6	NA	Y	66	45	noted w/ regard to coos that it is upsetting - sounds like they're in pain. Noted surpirse that screams would be more intense context than coos	34	41	75	0.666667	0.545455	0.641026	RMc18	RSr17	RSr17_2250.wav	0.755	762.6	1141	378.4	1013.3	116.67	762	982	0.2	0.264901	1895	-286.486	8.57e-05	1.37717	18.1	11.76	2.82	1031.2	1125
1482	12_Sr17_Mc18	31	N	2	4	32	2	1	2	430	18	F	English	N			NA	Y	47	35		38	40	78	0.583333	0.575758	0.384615	RMc18	RSr17	RSr17_2250.wav	0.755	762.6	1141	378.4	1013.3	116.67	762	982	0.2	0.264901	1895	-286.486	8.57e-05	1.37717	18.1	11.76	2.82	1031.2	1125
1483	12_Sr17_Mc18	2	N	2	3	36	2	1	2	683	19	F	English	N			NA	Y	49	42		36	37	73	0.595238	0.0606061	0.641026	RMc18	RSr17	RSr17_2250.wav	0.755	762.6	1141	378.4	1013.3	116.67	762	982	0.2	0.264901	1895	-286.486	8.57e-05	1.37717	18.1	11.76	2.82	1031.2	1125
1484	12_Sr17_Mc18	63	N	2	4	36	2	1	2	1095	19	F	English	N			NA	N	60	40		44	42	86	0.535714	0	0.717949	RMc18	RSr17	RSr17_2250.wav	0.755	762.6	1141	378.4	1013.3	116.67	762	982	0.2	0.264901	1895	-286.486	8.57e-05	1.37717	18.1	11.76	2.82	1031.2	1125
1485	12_Sr17_Mc18	32	N	2	1	23	2	1	2	896	23	F	English	N			NA	N	58	26		34	33	67	0.559524	0.424242	0.435897	RMc18	RSr17	RSr17_2250.wav	0.755	762.6	1141	378.4	1013.3	116.67	762	982	0.2	0.264901	1895	-286.486	8.57e-05	1.37717	18.1	11.76	2.82	1031.2	1125
1486	12_Sr17_Mc18	61	N	2	4	25	2	1	2	883	19	M	English	N			NA	Y	42	36		43	35	78	0.619048	0.424242	0.461538	RMc18	RSr17	RSr17_2250.wav	0.755	762.6	1141	378.4	1013.3	116.67	762	982	0.2	0.264901	1895	-286.486	8.57e-05	1.37717	18.1	11.76	2.82	1031.2	1125
1487	12_Sr17_Mc18	93	N	2	1	6	2	1	2	301	19	F	English	N			NA	Y	53	37		38	38	76	0.52381	0.30303	0.487179	RMc18	RSr17	RSr17_2250.wav	0.755	762.6	1141	378.4	1013.3	116.67	762	982	0.2	0.264901	1895	-286.486	8.57e-05	1.37717	18.1	11.76	2.82	1031.2	1125
1488	12_Sr17_Mc18	59	N	2	1	33	2	1	2	206	18	M	Gujarati	N			NA	N	37	38		NA	NA	NA	0.52381	0.393939	0.666667	RMc18	RSr17	RSr17_2250.wav	0.755	762.6	1141	378.4	1013.3	116.67	762	982	0.2	0.264901	1895	-286.486	8.57e-05	1.37717	18.1	11.76	2.82	1031.2	1125
1489	12_Sr17_Mc18	507	Y	2	1	8	2	0	1	1978	27	F	English	Y	Rhesus macaque, tufted capuchins	60	48	Y	NA	NA		NA	NA	NA	0.547619	1	0.666667	RMc18	RSr17	RSr17_2250.wav	0.755	762.6	1141	378.4	1013.3	116.67	762	982	0.2	0.264901	1895	-286.486	8.57e-05	1.37717	18.1	11.76	2.82	1031.2	1125
1490	12_Sr17_Mc18	49	N	2	4	39	2	1	2	318	18	F	English	N			NA	N	44	28		42	2	44	0.642857	0.454545	0.487179	RMc18	RSr17	RSr17_2250.wav	0.755	762.6	1141	378.4	1013.3	116.67	762	982	0.2	0.264901	1895	-286.486	8.57e-05	1.37717	18.1	11.76	2.82	1031.2	1125
1491	12_Sr17_Mc18	48	N	2	1	27	2	1	2	296	19	F	English	N			NA	Y	33	36		36	46	82	0.654762	0.606061	0.564103	RMc18	RSr17	RSr17_2250.wav	0.755	762.6	1141	378.4	1013.3	116.67	762	982	0.2	0.264901	1895	-286.486	8.57e-05	1.37717	18.1	11.76	2.82	1031.2	1125
1492	12_Sr17_Mc18	81	N	2	4	9	2	1	2	305	18	F	English	N			NA	Y	53	33		43	51	94	0.690476	0.454545	0.538462	RMc18	RSr17	RSr17_2250.wav	0.755	762.6	1141	378.4	1013.3	116.67	762	982	0.2	0.264901	1895	-286.486	8.57e-05	1.37717	18.1	11.76	2.82	1031.2	1125
1493	12_Sr17_Mc18	99	N	2	1	28	2	1	2	3	19	F	English + Hindi	N			NA	Y	56	37		37	39	76	0.595238	0.30303	0.461538	RMc18	RSr17	RSr17_2250.wav	0.755	762.6	1141	378.4	1013.3	116.67	762	982	0.2	0.264901	1895	-286.486	8.57e-05	1.37717	18.1	11.76	2.82	1031.2	1125
1494	12_Sr17_Mc18	111	N	2	3	35	2	1	2	846	21	F	English	N			NA	N	39	39		40	36	76	0.511905	0.575758	0.512821	RMc18	RSr17	RSr17_2250.wav	0.755	762.6	1141	378.4	1013.3	116.67	762	982	0.2	0.264901	1895	-286.486	8.57e-05	1.37717	18.1	11.76	2.82	1031.2	1125
1495	12_Sr17_Mc18	105	N	2	2	27	2	0	1	1344	19	F	English	N			NA	Y	44	36		40	42	82	0.571429	0.606061	0.435897	RMc18	RSr17	RSr17_2250.wav	0.755	762.6	1141	378.4	1013.3	116.67	762	982	0.2	0.264901	1895	-286.486	8.57e-05	1.37717	18.1	11.76	2.82	1031.2	1125
1496	12_Sr17_Mc18	62	N	2	4	27	2	1	2	234	18	F	English	Y	mice	1	NA	Y	59	32		46	40	86	0.559524	0.484848	0.538462	RMc18	RSr17	RSr17_2250.wav	0.755	762.6	1141	378.4	1013.3	116.67	762	982	0.2	0.264901	1895	-286.486	8.57e-05	1.37717	18.1	11.76	2.82	1031.2	1125
1497	12_Sr17_Mc18	37	N	2	2	13	2	1	2	281	19	F	Spanish	N			NA	Y	44	32		NA	NA	NA	0.52381	0.606061	0.641026	RMc18	RSr17	RSr17_2250.wav	0.755	762.6	1141	378.4	1013.3	116.67	762	982	0.2	0.264901	1895	-286.486	8.57e-05	1.37717	18.1	11.76	2.82	1031.2	1125
1498	12_Sr17_Mc18	51	N	2	1	22	2	1	2	446	18	F	English	N			NA	Y	31	36		45	44	89	0.654762	0.515152	0.615385	RMc18	RSr17	RSr17_2250.wav	0.755	762.6	1141	378.4	1013.3	116.67	762	982	0.2	0.264901	1895	-286.486	8.57e-05	1.37717	18.1	11.76	2.82	1031.2	1125
1499	12_Sr17_Mc18	106	N	2	4	14	2	1	2	181	18	F	Korean	N			NA	Y	53	39		NA	NA	NA	0.607143	0.606061	0.461538	RMc18	RSr17	RSr17_2250.wav	0.755	762.6	1141	378.4	1013.3	116.67	762	982	0.2	0.264901	1895	-286.486	8.57e-05	1.37717	18.1	11.76	2.82	1031.2	1125
1500	12_Sr17_Mc18	94	N	2	2	11	2	1	2	170	20	F	English	N			NA	Y	45	44		40	44	84	0.72619	0.878788	0.410256	RMc18	RSr17	RSr17_2250.wav	0.755	762.6	1141	378.4	1013.3	116.67	762	982	0.2	0.264901	1895	-286.486	8.57e-05	1.37717	18.1	11.76	2.82	1031.2	1125
1501	13_Mc18_Ur16	10	N	2	3	6	1	1	1	761	21	F	English	N			NA	Y	50	38		36	38	74	0.559524	0.757576	0.358974	RMc18	RUr16	RMc18_2342.wav	0.616	781.2	1456.5	675.3	1260.1	202.73	781	1378	0.32	0.519481	2110.94	-265.203	3.7e-05	1.32919	41.03	13.01	1.82	1218.8	1265.6
1502	13_Mc18_Ur16	97	N	2	4	14	1	1	1	312	19	F	English	N			NA	Y	48	28		40	43	83	0.595238	0.606061	0.487179	RMc18	RUr16	RMc18_2342.wav	0.616	781.2	1456.5	675.3	1260.1	202.73	781	1378	0.32	0.519481	2110.94	-265.203	3.7e-05	1.32919	41.03	13.01	1.82	1218.8	1265.6
1503	13_Mc18_Ur16	41	N	2	4	20	1	1	1	293	20	M	Vietnamese	N			NA	Y	45	29		NA	NA	NA	0.630952	0.454545	0.435897	RMc18	RUr16	RMc18_2342.wav	0.616	781.2	1456.5	675.3	1260.1	202.73	781	1378	0.32	0.519481	2110.94	-265.203	3.7e-05	1.32919	41.03	13.01	1.82	1218.8	1265.6
[truncated: 8,997 more rows]
[truncated: 56 more columns]
