# Supplementary material for: Humans read emotional arousal in monkey vocalizations: evidence for evolutionary continuities in communication
Source: PeerJ. 2022 Dec 1;10:e14471. doi: 10.7717/peerj.14471 (PMC9744152; doi:10.7717/peerj.14471)
Supplement: Supplemental Information 2 [file peerj-10-14471-s002.xlsx]

## Sheet: MixedStimuli Data
Subject	Experienced	BlockPresentationOrder	Trial	CorrectAnswer	Response.ACC	Response.OnsetDelay	Response.OnsetTime	Response.RESP	Response.RT	Response.RTTime	SoundFile
1	N	3	1	1	0	14	1434447	2	4026	1438473	13
1	N	3	2	1	0	4	1444006	2	567	1444573	21
1	N	3	3	2	0	12	1449795	1	242	1450037	20
1	N	3	4	2	0	6	1455284	1	1520	1456804	28
1	N	3	5	1	0	18	1462357	2	588	1462945	17
1	N	3	6	2	0	11	1468313	1	1395	1469708	6
1	N	3	7	1	0	9	1474853	2	1147	1476000	1
1	N	3	8	2	1	3	1482293	2	669	1482962	8
1	N	3	9	2	1	6	1488015	2	1942	1489957	30
1	N	3	10	2	0	13	1495489	1	764	1496253	32
1	N	3	11	1	1	15	1501962	1	386	1502348	7
1	N	3	12	2	0	8	1507918	1	971	1508889	4
1	N	3	13	2	1	5	1514274	2	416	1514690	18
1	N	3	14	1	0	13	1520347	2	1147	1521494	5
1	N	3	15	2	0	4	1527987	1	2426	1530413	16
1	N	3	16	1	0	3	1535778	2	364	1536142	15
1	N	3	17	2	0	5	1541834	1	1784	1543618	2
1	N	3	18	2	0	3	1549024	1	443	1549467	14
1	N	3	19	1	1	16	1554980	1	300	1555280	11
1	N	3	20	1	0	12	1561386	2	368	1561754	3
1	N	3	21	1	1	16	1567059	1	1821	1568880	29
1	N	3	22	1	1	4	1574249	1	710	1574959	19
1	N	3	23	1	1	10	1580939	1	1134	1582073	31
1	N	3	24	1	0	17	1587478	2	819	1588297	23
1	N	3	25	1	0	16	1594101	2	274	1594375	9
1	N	3	26	1	0	11	1599957	2	395	1600352	25
1	N	3	27	2	0	9	1606964	1	573	1607537	24
1	N	3	28	2	1	17	1612803	2	4679	1617482	22
1	N	3	29	2	0	6	1622829	1	511	1623340	12
1	N	3	30	2	1	15	1629319	2	440	1629759	26
1	N	3	31	1	0	3	1635809	2	713	1636522	27
1	N	3	32	1	0	9	1642265	2	386	1642651	33
1	N	3	33	2	1	13	1647887	2	492	1648379	10
2	N	2	1	2	0	2	1131552	1	585	1132137	8
2	N	2	2	2	0	8	1137541	1	648	1138189	14
2	N	2	3	1	0	4	1143297	2	417	1143714	1
2	N	2	4	1	0	14	1148986	2	425	1149411	29
2	N	2	5	2	0	4	1155091	1	364	1155455	2
2	N	2	6	1	0	5	1161431	2	352	1161783	31
2	N	2	7	2	0	14	1166986	1	459	1167445	10
2	N	2	8	2	0	12	1172775	1	439	1173214	12
2	N	2	9	1	0	6	1178915	2	295	1179210	33
2	N	2	10	2	0	3	1185789	1	375	1186164	24
2	N	2	11	2	0	16	1192111	1	391	1192502	26
2	N	2	12	2	0	14	1198000	1	586	1198586	32
2	N	2	13	2	0	12	1203972	1	328	1204300	18
2	N	2	14	1	0	3	1209377	2	662	1210039	13
2	N	2	15	1	0	8	1216117	2	287	1216404	3
2	N	2	16	1	0	4	1222056	2	522	1222578	7
2	N	2	17	2	0	8	1227779	1	344	1228123	28
2	N	2	18	1	0	17	1234168	2	59	1234227	27
2	N	2	19	2	1	2	1239273	2	1087	1240360	30
2	N	2	20	1	0	17	1246013	2	31	1246044	5
2	N	2	21	1	0	16	1251568	2	239	1251807	21
2	N	2	22	1	0	18	1257574	2	330	1257904	9
2	N	2	23	1	0	11	1263246	2	420	1263666	19
2	N	2	24	1	0	11	1269219	2	81	1269300	25
2	N	2	25	2	0	15	1275775	1	351	1276126	16
2	N	2	26	1	0	2	1281614	2	279	1281893	17
2	N	2	27	2	1	8	1287186	2	204	1287390	22
2	N	2	28	2	0	4	1292942	1	307	1293249	4
2	N	2	29	2	0	13	1298447	1	451	1298898	20
2	N	2	30	1	0	14	1304269	2	411	1304680	15
2	N	2	31	1	0	18	1310175	2	200	1310375	11
2	N	2	32	2	0	14	1315697	1	286	1315983	6
2	N	2	33	1	0	5	1321336	2	286	1321622	23
3	N	3	1	2	0	15	1540915	1	545	1541460	26
3	N	3	2	2	1	5	1546553	2	531	1547084	30
3	N	3	3	1	1	16	1552893	1	2869	1555762	7
3	N	3	4	2	1	9	1561084	2	346	1561430	22
3	N	3	5	1	1	17	1566740	1	1023	1567763	29
3	N	3	6	1	0	15	1573880	2	321	1574201	3
3	N	3	7	1	0	10	1579736	2	611	1580347	11
3	N	3	8	1	1	19	1585759	1	266	1586025	19
3	N	3	9	1	1	14	1591748	1	223	1591971	5
3	N	3	10	1	1	15	1597387	1	510	1597897	23
3	N	3	11	1	1	19	1603293	1	1082	1604375	15
3	N	3	12	1	1	16	1609599	1	453	1610052	13
3	N	3	13	1	1	15	1615805	1	861	1616666	33
3	N	3	14	2	0	16	1622378	1	360	1622738	2
3	N	3	15	2	1	15	1628117	2	293	1628410	6
3	N	3	16	1	1	7	1634590	1	838	1635428	27
3	N	3	17	2	1	3	1641047	2	2116	1643163	4
3	N	3	18	2	0	5	1648404	1	502	1648906	28
3	N	3	19	1	1	16	1654927	1	2213	1657140	31
3	N	3	20	1	0	15	1662301	2	3122	1665423	1
3	N	3	21	2	1	7	1670725	2	1539	1672264	10
3	N	3	22	2	1	14	1678767	2	491	1679258	16
3	N	3	23	1	0	8	1684806	2	586	1685392	17
3	N	3	24	1	0	5	1690979	2	331	1691310	21
3	N	3	25	2	0	13	1696534	1	3136	1699670	20
3	N	3	26	2	1	10	1705927	2	330	1706257	8
3	N	3	27	2	0	17	1711816	1	784	1712600	32
3	N	3	28	1	1	7	1718389	1	627	1719016	9
3	N	3	29	2	0	6	1724412	1	821	1725233	18
3	N	3	30	2	0	6	1731869	1	2801	1734670	24
3	N	3	31	2	0	13	1740094	1	991	1741085	14
3	N	3	32	1	1	16	1746700	1	1446	1748146	25
3	N	3	33	2	0	18	1753590	1	636	1754226	12
4	N	1	1	2	0	7	810946	1	386	811332	12
4	N	1	2	2	0	3	816418	1	542	816960	30
4	N	1	3	1	0	5	822241	2	406	822647	29
4	N	1	4	2	0	3	827897	1	203	828100	22
4	N	1	5	2	1	11	833502	2	375	833877	18
4	N	1	6	1	0	11	839608	2	1161	840769	33
4	N	1	7	1	0	2	846131	2	903	847034	15
4	N	1	8	1	1	7	852587	1	524	853111	25
4	N	1	9	1	0	9	859110	2	291	859401	31
4	N	1	10	2	0	10	864932	1	377	865309	32
4	N	1	11	1	1	10	870438	1	224	870662	1
4	N	1	12	2	0	18	876227	1	548	876775	4
4	N	1	13	1	1	10	882283	1	608	882891	17
4	N	1	14	2	0	8	888122	1	1257	889379	28
4	N	1	15	1	0	17	895029	2	745	895774	5
4	N	1	16	1	0	14	901335	2	216	901551	21
4	N	1	17	2	1	13	907541	2	271	907812	26
4	N	1	18	2	0	2	914397	1	93	914490	24
4	N	1	19	1	1	14	919986	1	344	920330	11
4	N	1	20	1	1	13	925725	1	2014	927739	23
4	N	1	21	1	1	16	933783	1	172	933955	27
4	N	1	22	1	0	13	939622	2	927	940549	7
4	N	1	23	2	1	6	945862	2	664	946526	6
4	N	1	24	2	0	16	952201	1	349	952550	2
4	N	1	25	1	1	9	957923	1	3786	961709	19
4	N	1	26	1	1	11	967800	1	1073	968873	3
4	N	1	27	1	0	4	974640	2	867	975507	9
4	N	1	28	2	0	13	982014	1	824	982838	16
4	N	1	29	2	0	5	988253	1	476	988729	14
4	N	1	30	1	1	13	993909	1	892	994801	13
4	N	1	31	2	1	17	999998	2	604	1000602	20
4	N	1	32	2	1	6	1006855	2	843	1007698	8
4	N	1	33	2	0	8	1012911	1	516	1013427	10
5	N	2	1	1	1	5	599272	1	2730	602002	27
5	N	2	2	1	1	11	608014	1	1897	609911	31
5	N	2	3	2	0	9	615337	1	782	616119	14
5	N	2	4	1	0	3	621243	2	1938	623181	1
5	N	2	5	2	1	5	628834	2	956	629790	2
5	N	2	6	2	0	6	635123	1	895	636018	12
5	N	2	7	1	0	18	641697	2	767	642464	7
5	N	2	8	1	0	15	648236	2	2376	650612	9
5	N	2	9	2	0	7	655827	1	808	656635	20
5	N	2	10	2	1	13	663117	2	231	663348	16
5	N	2	11	2	1	14	668573	2	225	668798	10
5	N	2	12	2	1	15	674395	2	612	675007	4
5	N	2	13	2	0	12	680334	1	469	680803	6
5	N	2	14	2	1	4	685873	2	1026	686899	30
5	N	2	15	1	0	4	692263	2	1776	694039	19
5	N	2	16	2	1	13	700003	2	978	700981	26
5	N	2	17	2	1	11	707244	2	489	707733	8
5	N	2	18	2	0	17	712999	1	475	713474	28
5	N	2	19	1	0	6	718972	2	235	719207	11
5	N	2	20	1	0	8	724744	2	80	724824	21
5	N	2	21	1	1	16	729933	1	2547	732480	13
5	N	2	22	1	0	3	738057	2	299	738356	25
5	N	2	23	1	0	15	744113	2	191	744304	33
5	N	2	24	1	0	17	749702	2	764	750466	23
5	N	2	25	1	1	11	755741	1	1389	757130	29
5	N	2	26	2	1	15	762531	2	2295	764826	18
5	N	2	27	1	0	16	770222	2	1070	771292	15
5	N	2	28	2	0	7	777913	1	304	778217	24
5	N	2	29	1	0	10	783869	2	62	783931	5
5	N	2	30	2	1	15	789207	2	327	789534	22
5	N	2	31	2	0	16	795080	1	328	795408	32
5	N	2	32	1	0	3	801487	2	221	801708	3
5	N	2	33	1	0	17	807241	2	1023	808264	17
6	N	3	1	2	0	7	864253	1	322	864575	28
6	N	3	2	2	1	17	869942	2	210	870152	6
6	N	3	3	1	1	10	876264	1	539	876803	3
6	N	3	4	1	0	18	882621	2	278	882899	9
6	N	3	5	1	0	2	888426	2	307	888733	11
6	N	3	6	2	0	15	893965	1	242	894207	20
6	N	3	7	2	0	12	899437	1	25	899462	10
6	N	3	8	1	1	4	905159	1	235	905394	7
6	N	3	9	1	1	17	910698	1	252	910950	29
6	N	3	10	1	1	11	917021	1	658	917679	27
6	N	3	11	1	0	15	923110	2	246	923356	23
6	N	3	12	2	1	9	928783	2	408	929191	14
6	N	3	13	2	0	10	934838	1	458	935296	4
6	N	3	14	1	0	17	940961	2	198	941159	25
6	N	3	15	1	1	13	946300	1	428	946728	13
6	N	3	16	1	1	17	952389	1	261	952650	5
6	N	3	17	1	1	7	957794	1	347	958141	1
6	N	3	18	2	1	3	963550	2	321	963871	18
6	N	3	19	2	0	18	969589	1	587	970176	2
6	N	3	20	2	1	6	976546	2	416	976962	8
6	N	3	21	2	0	6	982519	1	428	982947	32
6	N	3	22	1	1	12	988508	1	395	988903	17
6	N	3	23	2	1	4	995398	2	486	995884	16
6	N	3	24	2	0	9	1001254	1	399	1001653	12
6	N	3	25	1	1	9	1007126	1	273	1007399	19
6	N	3	26	1	0	6	1013015	2	415	1013430	21
6	N	3	27	2	0	12	1019421	1	293	1019714	26
6	N	3	28	2	0	10	1026378	1	269	1026647	24
6	N	3	29	2	1	19	1031750	2	543	1032293	30
6	N	3	30	1	0	18	1038373	2	328	1038701	31
6	N	3	31	1	1	13	1044463	1	345	1044808	33
6	N	3	32	1	0	11	1050201	2	578	1050779	15
6	N	3	33	2	0	9	1056091	1	326	1056417	22
7	N	2	1	1	1	13	1034507	1	1922	1036429	7
7	N	2	2	2	0	16	1041631	1	4065	1045696	10
7	N	2	3	1	0	16	1051190	2	306	1051496	17
7	N	2	4	2	1	3	1056846	2	1912	1058758	18
7	N	2	5	2	0	16	1064153	1	1610	1065763	14
7	N	2	6	1	0	9	1071277	2	283	1071560	21
7	N	2	7	1	1	13	1076899	1	482	1077381	19
7	N	2	8	2	1	17	1083872	2	874	1084746	16
7	N	2	9	1	0	10	1090295	2	665	1090960	25
7	N	2	10	1	0	11	1097052	2	269	1097321	3
7	N	2	11	1	0	10	1102607	2	1616	1104223	29
7	N	2	12	2	0	2	1109548	1	362	1109910	12
7	N	2	13	1	0	16	1115403	2	484	1115887	23
7	N	2	14	1	1	10	1121025	1	332	1121357	1
7	N	2	15	2	0	13	1126564	1	514	1127078	28
7	N	2	16	2	1	18	1132136	2	322	1132458	30
7	N	2	17	1	0	14	1138126	2	200	1138326	5
7	N	2	18	2	1	9	1144582	2	588	1145170	8
7	N	2	19	2	0	18	1150838	1	1960	1152798	2
7	N	2	20	2	1	16	1159380	2	1920	1161300	24
7	N	2	21	1	1	17	1166370	1	314	1166684	13
7	N	2	22	2	0	15	1172626	1	391	1173017	26
7	N	2	23	2	0	2	1178515	1	1177	1179692	32
7	N	2	24	1	0	11	1185188	2	308	1185496	11
7	N	2	25	1	0	15	1191511	2	236	1191747	27
7	N	2	26	1	0	10	1197083	2	2531	1199614	15
7	N	2	27	2	1	6	1204891	2	1555	1206446	22
7	N	2	28	1	0	16	1212215	2	244	1212459	9
7	N	2	29	2	0	5	1218004	1	362	1218366	4
7	N	2	30	2	1	5	1223693	2	506	1224199	6
7	N	2	31	2	1	11	1229398	2	730	1230128	20
7	N	2	32	1	0	7	1235855	2	257	1236112	33
7	N	2	33	1	0	15	1242111	2	1285	1243396	31
8	N	2	1	1	1	16	1448745	1	761	1449506	23
8	N	2	2	1	0	10	1455586	2	706	1456292	3
8	N	2	3	2	0	12	1461541	1	549	1462090	28
8	N	2	4	2	1	16	1468615	2	1137	1469752	16
8	N	2	5	1	1	3	1474921	1	616	1475537	1
8	N	2	6	2	1	7	1480777	2	1339	1482116	10
8	N	2	7	2	0	5	1487550	1	6591	1494141	14
8	N	2	8	1	1	7	1499529	1	163	1499692	15
8	N	2	9	2	0	14	1504951	1	342	1505293	20
8	N	2	10	2	0	7	1510389	1	558	1510947	30
8	N	2	11	1	0	5	1516645	2	301	1516946	7
8	N	2	12	2	0	9	1522368	1	267	1522635	18
8	N	2	13	2	1	7	1529274	2	319	1529593	24
8	N	2	14	2	0	11	1535597	1	296	1535893	26
8	N	2	15	2	1	19	1542187	2	292	1542479	8
8	N	2	16	1	1	19	1548577	1	376	1548953	27
8	N	2	17	2	1	9	1554266	2	250	1554516	22
8	N	2	18	1	1	16	1559637	1	370	1560007	13
8	N	2	19	1	0	3	1565394	2	294	1565688	19
8	N	2	20	1	0	6	1571482	2	207	1571689	9
8	N	2	21	1	0	16	1577221	2	245	1577466	11
8	N	2	22	2	0	6	1583144	1	379	1583523	2
8	N	2	23	1	0	5	1589066	2	496	1589562	17
8	N	2	24	2	1	17	1594939	2	640	1595579	6
8	N	2	25	1	0	8	1601178	2	259	1601437	25
8	N	2	26	2	0	3	1606801	1	274	1607075	12
8	N	2	27	1	0	11	1612406	2	2586	1614992	29
8	N	2	28	1	0	3	1620647	2	1071	1621718	5
8	N	2	29	1	1	17	1627487	1	1049	1628536	33
8	N	2	30	1	0	6	1634110	2	233	1634343	21
8	N	2	31	2	0	16	1640083	1	354	1640437	32
8	N	2	32	2	0	9	1646039	1	2376	1648415	4
8	N	2	33	1	0	9	1654430	2	222	1654652	31
9	N	4	1	2	0	16	2055010	1	491	2055501	16
9	N	4	2	2	0	14	2061032	1	412	2061444	32
9	N	4	3	2	0	17	2066805	1	1240	2068045	6
9	N	4	4	1	1	6	2073611	1	1220	2074831	25
9	N	4	5	2	0	8	2079901	1	706	2080607	30
9	N	4	6	1	0	14	2086124	2	475	2086599	11
9	N	4	7	1	0	6	2092313	2	876	2093189	33
9	N	4	8	1	0	3	2098720	2	743	2099463	17
9	N	4	9	1	1	16	2104859	1	610	2105469	15
9	N	4	10	2	0	5	2110831	1	391	2111222	12
9	N	4	11	2	0	9	2116453	1	356	2116809	28
9	N	4	12	1	0	13	2122826	2	325	2123151	31
9	N	4	13	1	0	5	2128832	2	369	2129201	7
9	N	4	14	2	0	8	2134788	1	449	2135237	4
9	N	4	15	1	0	7	2140994	2	871	2141865	9
9	N	4	16	2	0	18	2147567	1	289	2147856	2
9	N	4	17	1	0	9	2153156	2	2692	2155848	29
9	N	4	18	1	1	6	2161381	1	1751	2163132	21
9	N	4	19	2	0	14	2168521	1	382	2168903	18
9	N	4	20	1	0	16	2174293	2	1859	2176152	23
9	N	4	21	1	0	15	2181250	2	732	2181982	13
9	N	4	22	1	0	5	2187356	2	2626	2189982	19
9	N	4	23	2	0	10	2195264	1	1965	2197229	22
9	N	4	24	1	0	13	2203272	2	1279	2204551	27
9	N	4	25	1	0	11	2210646	2	218	2210864	3
9	N	4	26	1	0	8	2216535	2	368	2216903	5
9	N	4	27	2	0	8	2222874	1	679	2223553	26
9	N	4	28	2	0	10	2228747	1	678	2229425	20
9	N	4	29	2	0	6	2236037	1	676	2236713	24
9	N	4	30	2	0	13	2241926	1	1147	2243073	10
9	N	4	31	1	1	5	2248216	1	427	2248643	1
9	N	4	32	2	0	16	2254922	1	351	2255273	8
9	N	4	33	2	0	8	2260694	1	399	2261093	14
10	N	1	1	1	1	14	1152069	1	741	1152810	7
10	N	1	2	1	1	9	1158209	1	547	1158756	23
10	N	1	3	2	0	14	1164198	1	1982	1166180	14
10	N	1	4	1	0	14	1171939	2	1307	1173246	33
10	N	1	5	1	1	7	1178829	1	669	1179498	25
10	N	1	6	2	0	9	1184734	1	5128	1189862	10
10	N	1	7	1	1	12	1195545	1	2205	1197750	5
10	N	1	8	2	1	10	1204036	2	601	1204637	8
10	N	1	9	1	1	17	1210443	1	1309	1211752	9
10	N	1	10	2	1	3	1216849	2	784	1217633	30
10	N	1	11	1	0	18	1223172	2	4424	1227596	11
10	N	1	12	1	1	17	1232731	1	858	1233589	13
10	N	1	13	2	0	6	1238937	1	2711	1241648	12
10	N	1	14	2	1	15	1247245	2	91	1247336	4
10	N	1	15	2	1	13	1253968	2	584	1254552	24
10	N	1	16	2	1	7	1260525	2	1332	1261857	26
10	N	1	17	1	1	9	1266998	1	316	1267314	1
10	N	1	18	2	1	5	1272987	2	249	1273236	2
10	N	1	19	1	1	17	1278576	1	431	1279007	29
10	N	1	20	2	1	10	1284248	2	193	1284441	20
10	N	1	21	2	1	9	1289753	2	437	1290190	22
10	N	1	22	1	1	9	1296193	1	286	1296479	31
10	N	1	23	1	0	3	1302049	2	3174	1305223	21
10	N	1	24	1	1	17	1311307	1	644	1311951	27
10	N	1	25	2	1	5	1317380	2	325	1317705	18
10	N	1	26	1	1	12	1323086	1	664	1323750	15
10	N	1	27	1	1	13	1329142	1	2018	1331160	19
10	N	1	28	1	0	8	1337233	2	509	1337742	3
10	N	1	29	1	0	15	1343305	2	456	1343761	17
10	N	1	30	2	1	7	1349128	2	287	1349415	6
10	N	1	31	2	1	9	1354666	2	2751	1357417	28
10	N	1	32	2	1	14	1362991	2	3175	1366166	32
10	N	1	33	2	1	3	1372651	2	517	1373168	16
11	N	3	1	1	0	15	1936045	2	1905	1937950	9
11	N	3	2	2	0	10	1943953	1	692	1944645	26
11	N	3	3	1	1	4	1949809	1	502	1950311	1
11	N	3	4	2	1	8	1955715	2	1872	1957587	18
11	N	3	5	1	0	16	1963138	2	262	1963400	17
11	N	3	6	1	0	3	1969495	2	297	1969792	3
11	N	3	7	1	1	4	1975367	1	3704	1979071	25
11	N	3	8	2	1	5	1985710	2	411	1986121	24
11	N	3	9	1	1	6	1991816	1	362	1992178	7
11	N	3	10	1	0	6	1997739	2	283	1998022	21
11	N	3	11	1	0	9	2003695	2	4686	2008381	5
11	N	3	12	2	0	3	2013939	1	453	2014392	32
11	N	3	13	1	1	18	2019510	1	2893	2022403	13
11	N	3	14	1	1	18	2027718	1	400	2028118	29
11	N	3	15	1	1	13	2033524	1	454	2033978	19
11	N	3	16	2	0	7	2039329	1	996	2040325	12
11	N	3	17	2	0	10	2045569	1	920	2046489	28
11	N	3	18	1	1	17	2052525	1	3027	2055552	27
11	N	3	19	2	1	3	2060851	2	289	2061140	22
11	N	3	20	1	1	6	2066522	1	260	2066782	15
11	N	3	21	2	0	16	2072028	1	285	2072313	10
11	N	3	22	2	0	12	2077733	1	355	2078088	14
11	N	3	23	2	1	4	2083455	2	125	2083580	6
11	N	3	24	1	0	16	2089094	2	809	2089903	11
11	N	3	25	2	1	15	2096418	2	982	2097400	16
11	N	3	26	2	1	9	2103675	2	248	2103923	8
11	N	3	27	2	0	15	2109147	1	387	2109534	20
11	N	3	28	2	1	5	2114653	2	1219	2115872	30
11	N	3	29	1	1	13	2121893	1	252	2122145	31
11	N	3	30	2	0	15	2127899	1	1465	2129364	2
11	N	3	31	1	1	15	2135122	1	366	2135488	33
11	N	3	32	2	0	12	2141062	1	337	2141399	4
11	N	3	33	1	1	18	2146817	1	308	2147125	23
12	N	3	1	1	1	12	2313364	1	4692	2318056	19
12	N	3	2	2	0	6	2323090	1	2648	2325738	30
12	N	3	3	2	0	3	2331132	1	518	2331650	14
12	N	3	4	2	1	10	2336970	2	388	2337358	6
12	N	3	5	2	1	14	2342592	2	256	2342848	10
12	N	3	6	1	0	15	2348932	2	1681	2350613	3
12	N	3	7	2	1	16	2357090	2	900	2357990	16
12	N	3	8	2	1	18	2364264	2	619	2364883	8
12	N	3	9	2	0	14	2370436	1	482	2370918	4
12	N	3	10	1	0	8	2376292	2	251	2376543	23
12	N	3	11	2	0	10	2382064	1	485	2382549	32
12	N	3	12	1	0	9	2388087	2	283	2388370	25
12	N	3	13	1	0	4	2393425	2	321	2393746	13
12	N	3	14	1	1	8	2399464	1	233	2399697	33
12	N	3	15	1	0	18	2405670	2	310	2405980	31
12	N	3	16	1	1	14	2411660	1	323	2411983	7
12	N	3	17	2	0	10	2417182	1	381	2417563	20
12	N	3	18	2	1	12	2422954	2	631	2423585	18
12	N	3	19	1	1	18	2429127	1	398	2429525	21
12	N	3	20	1	0	18	2435049	2	781	2435830	17
12	N	3	21	2	0	15	2441172	1	529	2441701	12
12	N	3	22	2	1	11	2446927	2	559	2447486	28
12	N	3	23	1	1	8	2453517	1	319	2453836	27
12	N	3	24	1	1	11	2459189	1	324	2459513	15
12	N	3	25	1	0	6	2464995	2	291	2465286	11
12	N	3	26	2	0	3	2471869	1	223	2472092	24
12	N	3	27	1	0	4	2477223	2	246	2477469	1
12	N	3	28	1	1	16	2483229	1	336	2483565	9
12	N	3	29	2	1	4	2488835	2	677	2489512	22
12	N	3	30	2	1	7	2495441	2	252	2495693	26
12	N	3	31	1	0	11	2501347	2	329	2501676	5
12	N	3	32	2	0	13	2507353	1	317	2507670	2
12	N	3	33	1	1	8	2512925	1	232	2513157	29
13	N	1	1	2	0	14	1213324	1	281	1213605	12
13	N	1	2	2	0	3	1219530	1	1094	1220624	26
13	N	1	3	1	1	18	1226270	1	926	1227196	5
13	N	1	4	2	1	6	1232576	2	955	1233531	14
13	N	1	5	2	0	6	1238732	1	1552	1240284	28
13	N	1	6	1	1	18	1245388	1	247	1245635	13
13	N	1	7	1	1	3	1251712	1	508	1252220	3
13	N	1	8	2	0	14	1257534	1	443	1257977	6
13	N	1	9	2	1	15	1263356	2	69	1263425	18
13	N	1	10	1	1	7	1269128	1	362	1269490	33
13	N	1	11	2	0	11	1275735	1	409	1276144	8
13	N	1	12	2	1	5	1282708	2	344	1283052	24
13	N	1	13	1	1	16	1288580	1	747	1289327	17
13	N	1	14	2	0	5	1295020	1	605	1295625	2
13	N	1	15	1	1	3	1301276	1	68	1301344	7
13	N	1	16	1	1	7	1306715	1	533	1307248	19
13	N	1	17	1	1	8	1313004	1	123	1313127	9
13	N	1	18	2	1	15	1319594	2	4385	1323979	16
13	N	1	19	2	0	4	1329487	1	139	1329626	32
13	N	1	20	2	1	3	1334809	2	462	1335271	20
13	N	1	21	1	1	11	1341298	1	569	1341867	27
13	N	1	22	1	1	11	1347404	1	1095	1348499	21
13	N	1	23	1	1	7	1353627	1	656	1354283	1
13	N	1	24	2	0	13	1359850	1	23	1359873	4
13	N	1	25	1	1	15	1365155	1	6	1365161	29
13	N	1	26	2	1	5	1370427	2	45	1370472	22
13	N	1	27	1	1	6	1376432	1	360	1376792	31
13	N	1	28	2	0	8	1381838	1	72	1381910	30
13	N	1	29	1	1	8	1387243	1	519	1387762	15
13	N	1	30	1	0	5	1393132	2	752	1393884	23
13	N	1	31	1	0	14	1399388	2	356	1399744	11
13	N	1	32	1	1	18	1405294	1	584	1405878	25
13	N	1	33	2	1	10	1411066	2	431	1411497	10
14	N	2	1	1	0	12	1509765	2	884	1510649	11
14	N	2	2	1	1	17	1516455	1	710	1517165	9
14	N	2	3	1	1	5	1522761	1	926	1523687	25
14	N	2	4	2	1	16	1529284	2	3350	1532634	4
14	N	2	5	1	1	10	1538410	1	250	1538660	33
14	N	2	6	2	1	14	1544032	2	3873	1547905	12
14	N	2	7	2	1	11	1553324	2	1746	1555070	18
14	N	2	8	2	1	3	1561565	2	846	1562411	16
14	N	2	9	2	1	17	1569056	2	2448	1571504	24
14	N	2	10	1	1	17	1577548	1	1110	1578658	31
14	N	2	11	1	1	9	1584204	1	1242	1585446	17
14	N	2	12	1	1	12	1591511	1	531	1592042	27
14	N	2	13	2	1	6	1597133	2	2191	1599324	30
14	N	2	14	1	0	9	1605425	2	2933	1608358	3
14	N	2	15	2	1	9	1613583	2	496	1614079	10
14	N	2	16	1	1	12	1619772	1	1984	1621756	5
14	N	2	17	1	1	5	1627313	1	3981	1631294	21
14	N	2	18	2	1	8	1636672	2	1017	1637689	6
14	N	2	19	2	0	16	1643395	1	1725	1645120	2
14	N	2	20	2	0	3	1650686	1	569	1651255	32
14	N	2	21	1	1	6	1656408	1	2231	1658639	1
14	N	2	22	2	1	8	1663948	2	3802	1667750	22
14	N	2	23	1	1	12	1673074	1	689	1673763	29
14	N	2	24	1	1	9	1679146	1	717	1679863	15
14	N	2	25	1	1	15	1685603	1	697	1686300	7
14	N	2	26	2	1	15	1691525	2	6108	1697633	20
14	N	2	27	2	1	10	1703904	2	2822	1706726	8
14	N	2	28	1	0	14	1711862	2	4933	1716795	13
14	N	2	29	2	1	11	1722789	2	1113	1723902	26
14	N	2	30	2	1	11	1729128	2	2935	1732063	28
14	N	2	31	2	1	5	1737503	2	4241	1741744	14
14	N	2	32	1	0	11	1747363	2	2547	1749910	23
14	N	2	33	1	1	8	1755304	1	7169	1762473	19
15	N	3	1	1	1	17	1986692	1	2931	1989623	15
15	N	3	2	1	0	7	1995368	2	3560	1998928	33
15	N	3	3	1	0	9	2005010	2	2173	2007183	3
15	N	3	4	1	1	2	2012267	1	673	2012940	13
15	N	3	5	2	0	10	2018156	1	2371	2020527	20
15	N	3	6	1	1	14	2026064	1	912	2026976	17
15	N	3	7	1	1	11	2032654	1	1266	2033920	5
15	N	3	8	2	0	15	2039444	1	689	2040133	32
15	N	3	9	1	1	16	2046200	1	1959	2048159	27
15	N	3	10	2	1	15	2053574	2	1479	2055053	14
15	N	3	11	2	0	18	2060648	1	2236	2062884	4
15	N	3	12	2	0	3	2069156	1	972	2070128	8
15	N	3	13	1	0	12	2076113	2	1328	2077441	31
15	N	3	14	1	0	15	2082953	2	474	2083427	11
15	N	3	15	2	0	5	2089109	1	4129	2093238	2
15	N	3	16	1	0	8	2098651	2	2078	2100729	23
15	N	3	17	1	0	6	2105892	2	900	2106792	1
15	N	3	18	2	0	12	2112765	1	680	2113445	26
15	N	3	19	2	0	3	2118821	1	968	2119789	18
15	N	3	20	2	0	9	2126395	1	1731	2128126	24
15	N	3	21	2	0	15	2133502	1	2595	2136097	12
15	N	3	22	2	0	4	2141293	1	700	2141993	10
15	N	3	23	1	0	12	2147365	2	1534	2148899	19
15	N	3	24	2	1	16	2153972	2	2656	2156628	30
15	N	3	25	2	1	3	2161863	2	4891	2166754	28
15	N	3	26	1	1	17	2172523	1	1380	2173903	9
15	N	3	27	1	0	12	2179497	2	1148	2180645	25
15	N	3	28	1	1	11	2185936	1	2530	2188466	29
15	N	3	29	2	1	17	2193744	2	1919	2195663	22
15	N	3	30	2	1	4	2202152	2	1394	2203546	16
15	N	3	31	2	1	5	2208909	2	1089	2209998	6
15	N	3	32	1	0	5	2215532	2	4237	2219769	21
15	N	3	33	1	0	18	2225491	2	2766	2228257	7
16	N	3	1	1	1	12	1250436	1	663	1251099	17
16	N	3	2	1	0	10	1257209	2	680	1257889	3
16	N	3	3	2	0	14	1263248	1	786	1264034	12
16	N	3	4	1	1	8	1269438	1	677	1270115	23
16	N	3	5	2	1	14	1275560	2	522	1276082	18
16	N	3	6	2	1	10	1282717	2	641	1283358	24
16	N	3	7	2	1	11	1288590	2	556	1289146	20
16	N	3	8	2	1	8	1295129	2	548	1295677	26
16	N	3	9	2	1	16	1300968	2	390	1301358	22
16	N	3	10	2	0	17	1306607	1	623	1307230	10
16	N	3	11	2	1	6	1312580	2	395	1312975	6
16	N	3	12	1	0	15	1318369	2	604	1318973	15
16	N	3	13	2	0	11	1324541	1	664	1325205	4
16	N	3	14	1	0	3	1331248	2	258	1331506	27
16	N	3	15	2	1	4	1336603	2	431	1337034	30
16	N	3	16	1	1	7	1343026	1	320	1343346	31
16	N	3	17	1	1	14	1348681	1	477	1349158	29
16	N	3	18	2	1	18	1355471	2	301	1355772	8
16	N	3	19	1	1	19	1360927	1	393	1361320	1
16	N	3	20	1	0	8	1366849	2	364	1367213	11
16	N	3	21	1	1	5	1372321	1	720	1373041	13
16	N	3	22	2	0	18	1378277	1	296	1378573	28
16	N	3	23	2	0	12	1384133	1	294	1384427	32
16	N	3	24	1	1	4	1390138	1	291	1390429	7
16	N	3	25	1	0	15	1396194	2	284	1396478	33
16	N	3	26	2	0	5	1402167	1	746	1402913	2
16	N	3	27	2	0	5	1408323	1	396	1408719	14
16	N	3	28	2	1	14	1415230	2	538	1415768	16
16	N	3	29	1	0	4	1421335	2	321	1421656	21
16	N	3	30	1	0	16	1427341	2	323	1427664	5
16	N	3	31	1	1	10	1433247	1	362	1433609	25
16	N	3	32	1	0	7	1439370	2	317	1439687	9
16	N	3	33	1	1	3	1445075	1	763	1445838	19
17	N	3	1	2	1	3	1577652	2	1458	1579110	8
17	N	3	2	2	1	16	1585609	2	630	1586239	16
17	N	3	3	2	1	8	1591798	2	1476	1593274	4
17	N	3	4	2	1	15	1598672	2	612	1599284	18
17	N	3	5	2	1	6	1604494	2	460	1604954	10
17	N	3	6	1	1	9	1610684	1	491	1611175	33
17	N	3	7	2	1	4	1616439	2	492	1616931	22
17	N	3	8	2	1	11	1622328	2	816	1623144	14
17	N	3	9	1	1	3	1628435	1	606	1629041	29
17	N	3	10	1	1	16	1634574	1	760	1635334	17
17	N	3	11	2	1	15	1640546	2	379	1640925	20
17	N	3	12	1	1	4	1646468	1	491	1646959	21
17	N	3	13	1	1	10	1652975	1	586	1653561	31
17	N	3	14	1	1	14	1659064	1	862	1659926	11
17	N	3	15	2	1	18	1666555	2	1161	1667716	24
17	N	3	16	1	1	5	1673094	1	532	1673626	19
17	N	3	17	1	1	5	1679484	1	554	1680038	9
17	N	3	18	2	1	13	1686024	2	643	1686667	26
17	N	3	19	1	1	11	1692747	1	387	1693134	3
17	N	3	20	2	1	4	1698469	2	636	1699105	6
17	N	3	21	1	1	13	1705142	1	854	1705996	27
17	N	3	22	2	1	6	1711048	2	539	1711587	30
17	N	3	23	2	1	10	1717137	2	720	1717857	32
17	N	3	24	1	1	8	1723260	1	432	1723692	23
17	N	3	25	1	1	13	1728782	1	336	1729118	13
17	N	3	26	1	1	6	1734788	1	291	1735079	7
17	N	3	27	2	1	5	1740761	2	480	1741241	2
17	N	3	28	2	1	17	1746583	2	703	1747286	12
17	N	3	29	1	1	17	1752872	1	310	1753182	25
17	N	3	30	1	1	18	1758561	1	737	1759298	15
17	N	3	31	1	1	9	1764434	1	772	1765206	1
17	N	3	32	1	1	17	1770873	1	515	1771388	5
17	N	3	33	2	1	7	1776612	2	58	1776670	28
18	N	4	1	2	0	3	1542133	1	643	1542776	2
18	N	4	2	1	0	7	1548873	2	572	1549445	3
18	N	4	3	2	1	11	1554779	2	974	1555753	6
18	N	4	4	1	0	16	1561285	2	509	1561794	17
18	N	4	5	1	1	13	1567174	1	2707	1569881	19
18	N	4	6	1	0	9	1575866	2	847	1576713	31
18	N	4	7	2	0	16	1582273	1	2195	1584468	4
18	N	4	8	2	0	16	1589546	1	711	1590257	30
18	N	4	9	1	0	6	1595936	2	975	1596911	7
18	N	4	10	1	0	10	1602259	2	1640	1603899	15
18	N	4	11	1	0	8	1609449	2	603	1610052	25
18	N	4	12	2	0	8	1616022	1	413	1616435	26
18	N	4	13	1	0	16	1622095	2	353	1622448	5
18	N	4	14	2	1	4	1627700	2	398	1628098	22
18	N	4	15	1	0	8	1633840	2	667	1634507	33
18	N	4	16	1	0	7	1639812	2	964	1640776	29
18	N	4	17	2	0	2	1647386	1	482	1647868	24
18	N	4	18	2	0	15	1653209	1	481	1653690	12
18	N	4	19	2	0	5	1659081	1	396	1659477	14
18	N	4	20	2	0	12	1664686	1	1253	1665939	10
18	N	4	21	2	1	3	1672194	2	464	1672658	8
18	N	4	22	2	0	12	1679151	1	406	1679557	16
18	N	4	23	1	0	7	1685323	2	544	1685867	9
18	N	4	24	2	0	7	1691062	1	331	1691393	20
18	N	4	25	1	0	3	1696768	2	1347	1698115	23
18	N	4	26	1	0	12	1703207	2	439	1703646	13
18	N	4	27	1	1	4	1708796	1	622	1709418	1
18	N	4	28	1	0	7	1714935	2	363	1715298	11
18	N	4	29	2	0	15	1720825	1	960	1721785	32
18	N	4	30	2	0	7	1727014	1	977	1727991	28
18	N	4	31	2	0	7	1733454	1	738	1734192	18
18	N	4	32	1	0	11	1740244	2	271	1740515	27
18	N	4	33	1	0	5	1746049	2	309	1746358	21
19	N	2	1	2	1	19	1258401	2	396	1258797	22
19	N	2	2	1	1	5	1264940	1	366	1265306	3
19	N	2	3	1	1	4	1270963	1	456	1271419	5
19	N	2	4	2	0	8	1276635	1	274	1276909	28
19	N	2	5	1	1	3	1282959	1	163	1283122	27
19	N	2	6	1	1	13	1288597	1	83	1288680	15
19	N	2	7	2	0	7	1293985	1	260	1294245	10
19	N	2	8	1	1	3	1299974	1	67	1300041	7
19	N	2	9	2	0	8	1305363	1	74	1305437	12
19	N	2	10	2	1	14	1311119	2	691	1311810	2
19	N	2	11	1	0	15	1317358	2	644	1318002	21
19	N	2	12	1	1	15	1323514	1	205	1323719	11
19	N	2	13	2	1	8	1329236	2	192	1329428	18
19	N	2	14	1	1	10	1334825	1	805	1335630	29
19	N	2	15	1	1	4	1341615	1	573	1342188	31
19	N	2	16	2	0	5	1348788	1	524	1349312	24
19	N	2	17	1	1	14	1355045	1	411	1355456	33
19	N	2	18	1	1	19	1360667	1	404	1361071	13
19	N	2	19	2	1	7	1367340	2	457	1367797	8
19	N	2	20	1	1	18	1373212	1	356	1373568	19
19	N	2	21	1	0	14	1378968	2	296	1379264	23
19	N	2	22	2	0	5	1384790	1	341	1385131	32
19	N	2	23	1	0	5	1390662	2	690	1391352	17
19	N	2	24	2	0	14	1397436	1	396	1397832	26
19	N	2	25	1	0	4	1403592	2	487	1404079	9
19	N	2	26	2	0	4	1409464	1	432	1409896	14
19	N	2	27	2	0	16	1415470	1	549	1416019	4
19	N	2	28	2	0	16	1422510	1	715	1423225	16
19	N	2	29	2	1	9	1428516	2	376	1428892	20
19	N	2	30	2	0	9	1433971	1	438	1434409	30
19	N	2	31	1	1	8	1440177	1	129	1440306	25
19	N	2	32	2	1	4	1445649	2	406	1446055	6
19	N	2	33	1	1	7	1451188	1	744	1451932	1
20	Y	4	1	2	1	12	1507174	2	1409	1508583	18
20	Y	4	2	2	0	15	1513780	1	1072	1514852	10
20	Y	4	3	1	1	3	1519954	1	355	1520309	13
20	Y	4	4	2	0	10	1525508	1	445	1525953	20
20	Y	4	5	1	0	9	1531531	2	331	1531862	25
20	Y	4	6	1	0	18	1537554	2	920	1538474	7
20	Y	4	7	2	0	10	1544444	1	305	1544749	26
20	Y	4	8	1	1	8	1550283	1	368	1550651	17
20	Y	4	9	2	1	8	1556906	2	171	1557077	8
20	Y	4	10	1	0	13	1562478	2	253	1562731	23
20	Y	4	11	1	1	17	1568801	1	712	1569513	27
20	Y	4	12	2	0	9	1575040	1	386	1575426	32
20	Y	4	13	1	1	3	1580713	1	307	1581020	29
20	Y	4	14	2	1	10	1587486	2	411	1587897	16
20	Y	4	15	2	1	14	1594509	2	596	1595105	24
20	Y	4	16	2	0	10	1600682	1	310	1600992	4
20	Y	4	17	1	0	12	1606555	2	935	1607490	21
20	Y	4	18	2	1	11	1612761	2	185	1612946	22
20	Y	4	19	2	0	12	1618299	1	1174	1619473	12
20	Y	4	20	2	1	5	1624539	2	777	1625316	30
20	Y	4	21	1	0	15	1630695	2	571	1631266	15
20	Y	4	22	1	1	10	1636918	1	335	1637253	5
20	Y	4	23	1	1	6	1642623	1	595	1643218	19
20	Y	4	24	2	0	15	1648879	1	426	1649305	2
20	Y	4	25	1	1	11	1655052	1	309	1655361	33
20	Y	4	26	2	0	4	1660774	1	393	1661167	14
20	Y	4	27	1	0	10	1666296	2	355	1666651	1
20	Y	4	28	2	0	10	1671985	1	531	1672516	6
20	Y	4	29	1	0	7	1678575	2	1249	1679824	3
20	Y	4	30	1	0	14	1685348	2	451	1685799	11
20	Y	4	31	1	1	6	1691821	1	608	1692429	31
20	Y	4	32	1	1	14	1698178	1	538	1698716	9
20	Y	4	33	2	0	16	1703950	1	1424	1705374	28
21	N	3	1	2	1	18	1537765	2	413	1538178	2
21	N	3	2	1	1	3	1543287	1	396	1543683	1
21	N	3	3	2	1	7	1549660	2	159	1549819	26
21	N	3	4	2	1	4	1556433	2	452	1556885	24
21	N	3	5	1	1	3	1562923	1	330	1563253	27
21	N	3	6	1	1	15	1568645	1	1004	1569649	23
21	N	3	7	1	1	15	1575034	1	420	1575454	19
21	N	3	8	2	0	11	1581024	1	1337	1582361	4
21	N	3	9	1	0	13	1587914	2	1302	1589216	21
21	N	3	10	1	1	6	1595221	1	79	1595300	31
21	N	3	11	1	1	17	1601093	1	28	1601121	9
21	N	3	12	2	0	12	1606665	1	579	1607244	32
21	N	3	13	2	1	13	1612538	2	852	1613390	20
21	N	3	14	1	1	8	1619461	1	548	1620009	3
21	N	3	15	1	1	17	1625667	1	597	1626264	5
21	N	3	16	2	1	13	1631606	2	427	1632033	6
21	N	3	17	1	1	12	1637395	1	356	1637751	29
21	N	3	18	1	0	12	1643551	2	285	1643836	33
21	N	3	19	2	1	7	1649073	2	664	1649737	10
21	N	3	20	2	1	3	1654829	2	22	1654851	30
21	N	3	21	2	1	11	1660068	2	410	1660478	28
21	N	3	22	2	1	16	1665823	2	360	1666183	12
21	N	3	23	2	1	8	1671595	2	173	1671768	18
21	N	3	24	2	0	4	1677168	1	194	1677362	14
21	N	3	25	2	1	9	1683624	2	348	1683972	8
21	N	3	26	1	1	14	1689430	1	57	1689487	15
21	N	3	27	2	1	7	1694868	2	460	1695328	22
21	N	3	28	1	1	17	1700424	1	281	1700705	13
21	N	3	29	1	1	5	1706396	1	3304	1709700	7
21	N	3	30	1	1	8	1715288	1	258	1715546	25
21	N	3	31	2	1	12	1722128	2	234	1722362	16
21	N	3	32	1	0	8	1727884	2	5410	1733294	11
21	N	3	33	1	0	14	1738811	2	258	1739069	17
22	N	3	1	2	0	11	2353912	1	2274	2356186	22
22	N	3	2	2	1	11	2362720	2	2293	2365013	16
22	N	3	3	2	1	3	2371296	2	1307	2372603	8
22	N	3	4	1	0	15	2378419	2	845	2379264	9
22	N	3	5	1	1	12	2384592	1	1960	2386552	29
22	N	3	6	1	1	18	2392116	1	1823	2393939	21
22	N	3	7	2	0	15	2399640	1	1510	2401150	2
22	N	3	8	1	0	15	2406680	2	1772	2408452	11
22	N	3	9	2	1	6	2415072	2	985	2416057	24
22	N	3	10	2	1	8	2421261	2	1218	2422479	20
22	N	3	11	1	1	4	2428185	1	1344	2429529	7
22	N	3	12	1	0	9	2434925	2	1917	2436842	23
22	N	3	13	1	1	8	2442015	1	1774	2443789	1
22	N	3	14	2	0	17	2449389	1	1090	2450479	4
22	N	3	15	1	0	4	2456579	2	991	2457570	3
22	N	3	16	1	1	10	2462985	1	1395	2464380	15
22	N	3	17	2	1	9	2469942	2	3116	2473058	32
22	N	3	18	2	0	11	2478284	1	2104	2480388	10
22	N	3	19	1	1	18	2486408	1	587	2486995	31
22	N	3	20	1	1	4	2492581	1	821	2493402	25
22	N	3	21	1	1	15	2498971	1	1307	2500278	17
22	N	3	22	2	0	7	2505627	1	1831	2507458	12
22	N	3	23	1	0	8	2512851	2	2557	2515408	19
22	N	3	24	1	0	18	2521476	2	2177	2523653	27
22	N	3	25	1	0	3	2529334	2	1078	2530412	5
22	N	3	26	2	0	18	2535840	1	1593	2537433	14
22	N	3	27	2	0	11	2542680	1	1560	2544240	28
22	N	3	28	2	1	7	2549320	2	799	2550119	30
22	N	3	29	2	1	16	2555526	2	2155	2557681	6
22	N	3	30	1	1	7	2563450	1	1915	2565365	33
22	N	3	31	1	1	18	2570491	1	1288	2571779	13
22	N	3	32	2	0	14	2577781	1	1028	2578809	26
22	N	3	33	2	0	16	2584254	1	924	2585178	18
23	N	1	1	1	1	10	3714909	1	1330	3716239	31
23	N	1	2	2	0	17	3721316	1	1640	3722956	30
23	N	1	3	1	1	5	3728039	1	3115	3731154	13
23	N	1	4	1	0	15	3736664	2	275	3736939	11
23	N	1	5	1	1	10	3742469	1	2796	3745265	17
23	N	1	6	2	1	5	3751211	2	373	3751584	26
23	N	1	7	2	1	4	3757234	2	425	3757659	2
23	N	1	8	1	1	16	3763707	1	504	3764211	27
23	N	1	9	1	1	17	3769996	1	1997	3771993	9
23	N	1	10	2	1	7	3777320	2	263	3777583	6
23	N	1	11	1	1	18	3782959	1	200	3783159	15
23	N	1	12	2	1	3	3789415	2	530	3789945	8
23	N	1	13	2	1	3	3795338	2	1286	3796624	14
23	N	1	14	2	0	5	3801811	1	853	3802664	20
23	N	1	15	1	0	3	3808300	2	2788	3811088	5
23	N	1	16	1	0	15	3816825	2	1205	3818030	33
23	N	1	17	1	1	17	3823582	1	754	3824336	21
23	N	1	18	1	1	5	3830021	1	759	3830780	7
23	N	1	19	2	0	5	3835994	1	597	3836591	28
23	N	1	20	1	1	10	3841983	1	601	3842584	23
23	N	1	21	2	1	10	3849073	2	613	3849686	16
23	N	1	22	1	1	3	3854979	1	847	3855826	29
23	N	1	23	2	1	4	3862436	2	513	3862949	24
23	N	1	24	1	0	18	3869043	2	819	3869862	3
23	N	1	25	1	1	10	3874998	1	3231	3878229	1
23	N	1	26	2	0	12	3883757	1	664	3884421	32
23	N	1	27	2	0	8	3889980	1	641	3890621	4
23	N	1	28	1	0	3	3896202	2	553	3896755	25
23	N	1	29	2	0	11	3902041	1	632	3902673	22
23	N	1	30	2	0	6	3908081	1	404	3908485	18
23	N	1	31	1	1	8	3913853	1	1701	3915554	19
23	N	1	32	2	0	11	3920926	1	446	3921372	12
23	N	1	33	2	0	9	3926582	1	1770	3928352	10
24	N	1	1	2	0	4	9615126	1	582	9615708	30
24	N	1	2	2	0	8	9620931	1	464	9621395	28
24	N	1	3	2	1	16	9626587	2	582	9627169	20
24	N	1	4	1	1	10	9633143	1	592	9633735	31
24	N	1	5	1	0	5	9639233	2	435	9639668	21
24	N	1	6	1	0	17	9645706	2	453	9646159	27
24	N	1	7	1	0	6	9651912	2	380	9652292	9
24	N	1	8	1	0	4	9657650	2	436	9658086	19
24	N	1	9	2	1	3	9663439	2	398	9663837	18
24	N	1	10	1	0	9	9668961	2	377	9669338	1
24	N	1	11	1	1	6	9674901	1	409	9675310	25
24	N	1	12	2	0	19	9681791	1	887	9682678	16
24	N	1	13	1	1	17	9688047	1	295	9688342	15
24	N	1	14	2	1	17	9694620	2	273	9694893	8
24	N	1	15	2	1	12	9700842	2	365	9701207	26
24	N	1	16	1	0	3	9706715	2	535	9707250	11
24	N	1	17	1	0	15	9712954	2	385	9713339	33
24	N	1	18	2	0	7	9718726	1	603	9719329	14
24	N	1	19	2	0	3	9725000	1	469	9725469	2
24	N	1	20	1	0	18	9730988	2	240	9731228	17
24	N	1	21	1	1	9	9736577	1	321	9736898	23
24	N	1	22	2	1	10	9742216	2	487	9742703	12
24	N	1	23	2	0	16	9748022	1	682	9748704	6
24	N	1	24	2	1	12	9753961	2	312	9754273	22
24	N	1	25	2	0	16	9759816	1	372	9760188	32
24	N	1	26	2	0	7	9766756	1	510	9767266	24
24	N	1	27	1	0	16	9772545	2	249	9772794	29
24	N	1	28	2	1	10	9777984	2	305	9778289	10
24	N	1	29	2	0	17	9783873	1	294	9784167	4
24	N	1	30	1	0	4	9790229	2	399	9790628	3
24	N	1	31	1	0	17	9795718	2	520	9796238	13
24	N	1	32	1	1	17	9801874	1	928	9802802	5
24	N	1	33	1	0	4	9808464	2	307	9808771	7
25	N	2	1	2	1	12	1519565	2	2430	1521995	20
25	N	2	2	2	0	3	1527389	1	1758	1529147	18
25	N	2	3	2	1	6	1535397	2	591	1535988	8
25	N	2	4	1	1	13	1541987	1	276	1542263	31
25	N	2	5	1	0	11	1547826	2	284	1548110	21
25	N	2	6	1	0	17	1553632	2	340	1553972	17
25	N	2	7	2	1	14	1559938	2	362	1560300	26
25	N	2	8	1	1	3	1565677	1	177	1565854	19
25	N	2	9	2	1	14	1571082	2	170	1571252	10
25	N	2	10	2	1	12	1576454	2	1398	1577852	28
25	N	2	11	2	1	12	1584479	2	108	1584587	24
25	N	2	12	1	1	8	1589717	1	853	1590570	1
25	N	2	13	1	0	4	1596641	2	1383	1598024	3
25	N	2	14	2	0	17	1603714	1	351	1604065	2
25	N	2	15	2	0	17	1609403	1	515	1609918	12
25	N	2	16	1	1	5	1615192	1	1054	1616246	29
25	N	2	17	1	0	6	1621999	2	403	1622402	9
25	N	2	18	1	0	10	1627905	2	210	1628115	11
25	N	2	19	2	1	18	1634628	2	282	1634910	16
25	N	2	20	2	1	9	1640267	2	302	1640569	6
25	N	2	21	1	1	3	1645940	1	197	1646137	23
25	N	2	22	2	0	12	1651678	1	256	1651934	32
25	N	2	23	1	1	2	1657500	1	735	1658235	25
25	N	2	24	1	1	13	1663606	1	483	1664089	15
25	N	2	25	1	0	3	1669762	2	1672	1671434	7
25	N	2	26	2	0	13	1676853	1	4958	1681811	14
25	N	2	27	1	1	3	1686879	1	2594	1689473	13
25	N	2	28	2	0	4	1694753	1	1704	1696457	22
25	N	2	29	2	1	5	1701510	2	2241	1703751	30
25	N	2	30	1	0	12	1709501	2	2598	1712099	33
25	N	2	31	2	0	12	1717659	1	2566	1720225	4
25	N	2	32	1	1	16	1726034	1	1615	1727649	5
25	N	2	33	1	1	15	1733692	1	1070	1734762	27
26	N	2	1	2	0	9	4373833	1	866	4374699	24
26	N	2	2	2	0	3	4380105	1	897	4381002	14
26	N	2	3	2	0	16	4386345	1	1126	4387471	12
26	N	2	4	1	1	4	4393018	1	422	4393440	25
26	N	2	5	2	1	13	4398624	2	823	4399447	20
26	N	2	6	1	1	5	4404813	1	931	4405744	15
26	N	2	7	1	0	15	4411253	2	256	4411509	17
26	N	2	8	2	1	15	4418009	2	347	4418356	16
26	N	2	9	1	0	12	4423898	2	262	4424160	21
26	N	2	10	1	0	4	4430188	2	256	4430444	27
26	N	2	11	1	1	16	4436427	1	166	4436593	31
26	N	2	12	1	0	13	4442083	2	98	4442181	11
26	N	2	13	2	1	8	4448122	2	508	4448630	26
26	N	2	14	2	0	17	4454145	1	309	4454454	32
26	N	2	15	2	0	10	4459817	1	1048	4460865	6
26	N	2	16	1	1	9	4466206	1	417	4466623	19
26	N	2	17	1	0	9	4471762	2	229	4471991	1
26	N	2	18	1	0	15	4477701	2	569	4478270	33
26	N	2	19	1	0	16	4484041	2	945	4484986	9
26	N	2	20	2	1	4	4490063	2	598	4490661	30
26	N	2	21	2	1	4	4495935	2	172	4496107	22
26	N	2	22	1	0	7	4501474	2	453	4501927	23
26	N	2	23	2	0	4	4507597	1	323	4507920	2
26	N	2	24	1	1	3	4513569	1	55	4513624	5
26	N	2	25	1	1	5	4518691	1	237	4518928	13
26	N	2	26	2	1	15	4524146	2	362	4524508	10
26	N	2	27	2	0	6	4529735	1	646	4530381	28
26	N	2	28	2	1	9	4536625	2	323	4536948	8
26	N	2	29	1	1	6	4543032	1	550	4543582	3
26	N	2	30	1	0	17	4549271	2	309	4549580	7
26	N	2	31	2	1	7	4554960	2	490	4555450	18
26	N	2	32	1	1	13	4560766	1	1334	4562100	29
26	N	2	33	2	1	8	4567689	2	797	4568486	4
27	N	2	1	1	1	17	842411	1	430	842841	5
27	N	2	2	2	0	8	848233	1	103	848336	18
27	N	2	3	2	0	12	853905	1	40	853945	4
27	N	2	4	2	0	12	859127	1	8	859135	10
27	N	2	5	1	0	8	864466	2	82	864548	19
27	N	2	6	2	0	15	870071	1	1236	871307	32
27	N	2	7	2	0	8	876494	1	4069	880563	20
27	N	2	8	2	0	9	885770	1	3402	889172	28
27	N	2	9	1	0	11	894529	2	6488	901017	23
27	N	2	10	1	0	5	906073	2	340	906413	13
27	N	2	11	2	0	14	911812	1	92	911904	12
27	N	2	12	1	0	12	917468	2	255	917723	25
27	N	2	13	1	0	15	923424	2	741	924165	33
27	N	2	14	1	1	15	930230	1	252	930482	27
27	N	2	15	1	1	7	936002	1	5871	941873	17
27	N	2	16	2	0	11	947547	1	96	947643	2
27	N	2	17	1	0	10	953620	2	9985	963605	31
27	N	2	18	1	0	3	969268	2	377	969645	7
27	N	2	19	1	0	4	975141	2	241	975382	21
27	N	2	20	2	0	17	980446	1	83	980529	30
27	N	2	21	2	0	4	986986	1	11	986997	16
27	N	2	22	1	0	7	992474	2	240	992714	11
27	N	2	23	2	0	3	998982	1	198	999180	8
27	N	2	24	2	0	7	1005254	1	1693	1006947	26
27	N	2	25	1	0	9	1012194	2	331	1012525	29
27	N	2	26	1	0	3	1018283	2	589	1018872	9
27	N	2	27	1	0	12	1024956	2	3098	1028054	3
27	N	2	28	2	0	17	1034632	1	168	1034800	24
27	N	2	29	2	0	6	1040138	1	748	1040886	6
27	N	2	30	1	1	10	1046227	1	316	1046543	15
27	N	2	31	2	0	5	1051799	1	341	1052140	22
27	N	2	32	2	0	5	1057538	1	296	1057834	14
27	N	2	33	1	1	3	1062961	1	655	1063616	1
28	N	4	1	1	0	13	2532891	2	1678	2534569	13
28	N	4	2	2	0	17	2540098	1	523	2540621	32
28	N	4	3	1	0	15	2546404	2	1510	2547914	9
28	N	4	4	1	1	18	2553061	1	561	2553622	1
28	N	4	5	2	0	18	2559034	1	308	2559342	14
28	N	4	6	2	0	14	2564689	1	603	2565292	12
28	N	4	7	1	0	3	2571362	2	1797	2573159	3
28	N	4	8	1	1	17	2578436	1	241	2578677	29
28	N	4	9	2	1	11	2584942	2	210	2585152	8
28	N	4	10	2	1	10	2590498	2	340	2590838	6
28	N	4	11	2	1	15	2596537	2	526	2597063	2
28	N	4	12	2	1	6	2602126	2	184	2602310	30
28	N	4	13	1	1	14	2607965	1	1417	2609382	5
28	N	4	14	2	0	17	2615973	1	475	2616448	24
28	N	4	15	1	1	10	2622162	1	1105	2623267	33
28	N	4	16	1	1	18	2628652	1	922	2629574	19
28	N	4	17	2	1	11	2634791	2	793	2635584	20
28	N	4	18	1	0	3	2641264	2	1021	2642285	7
28	N	4	19	2	1	16	2647687	2	215	2647902	18
28	N	4	20	2	1	7	2653093	2	980	2654073	10
28	N	4	21	2	1	6	2659349	2	339	2659688	22
28	N	4	22	2	0	15	2665271	1	610	2665881	4
28	N	4	23	1	0	9	2671411	2	2540	2673951	21
28	N	4	24	2	0	8	2679902	1	434	2680336	26
28	N	4	25	1	1	10	2685725	1	780	2686505	23
28	N	4	26	2	1	3	2692982	2	414	2693396	16
28	N	4	27	1	1	2	2699371	1	1268	2700639	31
28	N	4	28	1	1	6	2706211	1	815	2707026	25
28	N	4	29	1	0	14	2712518	2	720	2713238	11
28	N	4	30	1	1	13	2718774	1	470	2719244	17
28	N	4	31	2	0	8	2724479	1	292	2724771	28
28	N	4	32	1	1	9	2730819	1	1705	2732524	27
28	N	4	33	1	1	3	2737893	1	850	2738743	15
29	N	4	1	1	1	17	5559271	1	3599	5562870	13
29	N	4	2	2	0	5	5568280	1	1536	5569816	14
29	N	4	3	1	0	11	5575336	2	2573	5577909	17
29	N	4	4	1	1	3	5583445	1	1119	5584564	21
29	N	4	5	2	1	5	5589918	2	579	5590497	6
29	N	4	6	1	0	14	5595890	2	4240	5600130	23
29	N	4	7	2	0	10	5605333	1	2866	5608199	10
29	N	4	8	2	1	8	5614708	2	337	5615045	16
29	N	4	9	2	1	4	5620748	2	684	5621432	2
29	N	4	10	1	1	5	5626570	1	1093	5627663	1
29	N	4	11	1	1	18	5632943	1	1307	5634250	29
29	N	4	12	1	1	14	5639633	1	3249	5642882	19
29	N	4	13	2	1	11	5648275	2	4757	5653032	18
29	N	4	14	1	0	10	5658768	2	1102	5659870	33
29	N	4	15	2	0	11	5665108	1	2132	5667240	28
29	N	4	16	1	0	17	5672916	2	2741	5675657	5
29	N	4	17	2	0	6	5681641	1	890	5682531	26
29	N	4	18	2	0	15	5688081	1	1079	5689160	32
29	N	4	19	2	0	8	5694504	1	1570	5696074	12
29	N	4	20	1	0	3	5701560	2	369	5701929	11
29	N	4	21	2	1	17	5707516	2	2580	5710096	4
29	N	4	22	1	0	12	5716075	2	1763	5717838	31
29	N	4	23	1	1	3	5723533	1	509	5724042	7
29	N	4	24	2	0	9	5729238	1	1448	5730686	20
29	N	4	25	1	0	3	5736262	2	531	5736793	25
29	N	4	26	1	0	3	5742885	2	458	5743343	3
29	N	4	27	2	1	8	5748406	2	582	5748988	30
29	N	4	28	2	0	17	5755597	1	521	5756118	24
29	N	4	29	2	1	8	5761419	2	514	5761933	22
29	N	4	30	1	0	3	5767692	2	1134	5768826	9
29	N	4	31	2	1	4	5775099	2	1732	5776831	8
29	N	4	32	1	0	3	5782890	2	1118	5784008	27
29	N	4	33	1	1	12	5789380	1	1015	5790395	15
30	N	2	1	2	1	7	2038388	2	2612	2041000	22
30	N	2	2	1	0	3	2046429	2	373	2046802	23
30	N	2	3	2	1	3	2052535	2	1412	2053947	2
30	N	2	4	1	0	9	2059926	2	1099	2061025	31
30	N	2	5	1	0	6	2067166	2	691	2067857	27
30	N	2	6	1	1	15	2072955	1	1893	2074848	13
30	N	2	7	1	0	14	2080329	2	188	2080517	11
30	N	2	8	2	0	8	2085717	1	1910	2087627	10
30	N	2	9	2	1	18	2092991	2	174	2093165	6
30	N	2	10	1	0	18	2098446	2	2103	2100549	29
30	N	2	11	2	0	16	2105870	1	199	2106069	12
30	N	2	12	2	0	15	2111609	1	146	2111755	32
30	N	2	13	1	0	5	2116881	2	600	2117481	1
30	N	2	14	1	0	14	2122853	2	308	2123161	19
30	N	2	15	1	0	16	2128676	2	4	2128680	17
30	N	2	16	1	0	3	2134748	2	161	2134909	3
30	N	2	17	2	0	16	2141405	1	368	2141773	16
30	N	2	18	1	0	10	2147311	2	378	2147689	21
30	N	2	19	1	0	7	2153433	2	204	2153637	9
30	N	2	20	1	0	7	2159356	2	293	2159649	33
30	N	2	21	1	0	6	2165328	2	1561	2166889	7
30	N	2	22	1	0	17	2172552	2	80	2172632	5
30	N	2	23	2	0	18	2177723	1	589	2178312	30
30	N	2	24	2	0	7	2183879	1	693	2184572	4
30	N	2	25	2	0	18	2189985	1	268	2190253	14
30	N	2	26	2	0	18	2196842	1	133	2196975	24
30	N	2	27	2	0	18	2203232	1	693	2203925	8
30	N	2	28	2	0	5	2209121	1	1391	2210512	28
30	N	2	29	1	0	13	2215894	2	1007	2216901	15
30	N	2	30	2	1	15	2222083	2	1344	2223427	20
30	N	2	31	2	0	12	2229374	1	628	2230002	26
30	N	2	32	1	0	4	2235563	2	121	2235684	25
30	N	2	33	2	0	4	2241068	1	1214	2242282	18
31	N	1	1	1	0	6	1930289	2	652	1930941	31
31	N	1	2	1	0	16	1937013	2	542	1937555	27
31	N	1	3	2	1	11	1944069	2	916	1944985	16
31	N	1	4	2	0	16	1950342	1	383	1950725	12
31	N	1	5	1	0	3	1956231	2	880	1957111	11
31	N	1	6	2	1	13	1963088	2	624	1963712	26
31	N	1	7	2	1	3	1968777	2	601	1969378	30
31	N	1	8	1	1	3	1974750	1	903	1975653	15
31	N	1	9	1	1	16	1981406	1	954	1982360	33
31	N	1	10	1	1	10	1987912	1	732	1988644	25
31	N	1	11	2	0	13	1993868	1	1233	1995101	10
31	N	1	12	1	0	13	2000491	2	1573	2002064	19
31	N	1	13	2	0	14	2007431	1	342	2007773	6
31	N	1	14	1	0	8	2012920	2	734	2013654	1
31	N	1	15	1	1	16	2019359	1	316	2019675	7
31	N	1	16	2	1	12	2026283	2	576	2026859	24
31	N	1	17	1	1	14	2032522	1	551	2033073	5
31	N	1	18	2	1	17	2038478	2	1123	2039601	14
31	N	1	19	2	1	15	2045902	2	433	2046335	8
31	N	1	20	2	1	16	2051541	2	859	2052400	20
31	N	1	21	2	1	6	2057647	2	1350	2058997	28
31	N	1	22	1	1	19	2064537	1	725	2065262	17
31	N	1	23	2	0	5	2070943	1	950	2071893	2
31	N	1	24	1	1	15	2077282	1	616	2077898	23
31	N	1	25	1	1	5	2082971	1	672	2083643	13
31	N	1	26	2	1	15	2088944	2	661	2089605	22
31	N	1	27	1	0	12	2095717	2	832	2096549	3
31	N	1	28	1	1	9	2102307	1	467	2102774	9
31	N	1	29	2	0	15	2108296	1	858	2109154	32
31	N	1	30	1	0	8	2114435	2	640	2115075	29
31	N	1	31	2	0	14	2120658	1	598	2121256	4
31	N	1	32	1	0	17	2126797	2	463	2127260	21
31	N	1	33	2	1	5	2132636	2	706	2133342	18
32	N	2	1	2	0	18	2064248	1	1158	2065406	30
32	N	2	2	1	0	16	2070504	2	2153	2072657	13
32	N	2	3	1	0	16	2078428	2	1730	2080158	9
32	N	2	4	1	1	16	2086219	1	603	2086822	27
32	N	2	5	2	0	18	2092509	1	994	2093503	2
32	N	2	6	2	0	7	2098898	1	823	2099721	14
32	N	2	7	1	1	6	2105805	1	832	2106637	3
32	N	2	8	2	0	9	2112228	1	467	2112695	4
32	N	2	9	1	1	3	2118084	1	1656	2119740	23
32	N	2	10	1	1	16	2125441	1	1219	2126660	7
32	N	2	11	1	1	5	2131830	1	1263	2133093	1
32	N	2	12	2	0	7	2138303	1	633	2138936	10
32	N	2	13	1	0	9	2144309	2	538	2144847	15
32	N	2	14	2	1	8	2150048	2	1014	2151062	20
32	N	2	15	2	1	12	2156421	2	510	2156931	6
32	N	2	16	1	1	8	2162593	1	1068	2163661	5
32	N	2	17	1	0	5	2169183	2	555	2169738	21
32	N	2	18	1	0	16	2175239	2	443	2175682	11
32	N	2	19	1	0	13	2181412	2	486	2181898	33
32	N	2	20	2	1	9	2188519	2	1312	2189831	24
32	N	2	21	1	1	12	2195826	1	410	2196236	31
32	N	2	22	1	0	18	2201765	2	333	2202098	17
32	N	2	23	2	0	11	2208605	1	510	2209115	16
32	N	2	24	2	1	9	2215378	2	357	2215735	8
32	N	2	25	1	0	8	2221117	2	688	2221805	19
32	N	2	26	2	0	8	2227039	1	469	2227508	28
32	N	2	27	2	0	10	2233045	1	226	2233271	32
32	N	2	28	2	0	14	2238667	1	327	2238994	18
32	N	2	29	2	0	9	2244940	1	732	2245672	26
32	N	2	30	1	1	12	2250946	1	1666	2252612	29
32	N	2	31	1	1	3	2258170	1	509	2258679	25
32	N	2	32	2	1	11	2263959	2	163	2264122	22
32	N	2	33	2	0	17	2269481	1	510	2269991	12
33	N	4	1	1	0	11	1516271	2	887	1517158	29
33	N	4	2	2	0	4	1523761	1	310	1524071	24
33	N	4	3	1	0	4	1529734	2	320	1530054	7
33	N	4	4	2	0	10	1535723	1	270	1535993	4
33	N	4	5	1	0	18	1541095	2	374	1541469	13
33	N	4	6	2	0	17	1546884	1	234	1547118	12
33	N	4	7	1	0	10	1552790	2	231	1553021	5
33	N	4	8	1	0	9	1558762	2	171	1558933	33
33	N	4	9	2	0	14	1564151	1	268	1564419	10
33	N	4	10	2	0	16	1569639	1	264	1569903	20
33	N	4	11	1	1	17	1575278	1	218	1575496	15
33	N	4	12	2	0	4	1580750	1	317	1581067	28
33	N	4	13	2	0	17	1586472	1	268	1586740	18
33	N	4	14	1	1	14	1592178	1	211	1592389	19
33	N	4	15	2	0	13	1597917	1	242	1598159	32
33	N	4	16	1	1	5	1604156	1	215	1604371	31
33	N	4	17	1	0	14	1609895	2	152	1610047	11
33	N	4	18	2	1	3	1615400	2	256	1615656	6
33	N	4	19	1	0	18	1621256	2	311	1621567	25
33	N	4	20	2	0	3	1627245	1	323	1627568	2
33	N	4	21	1	0	9	1633752	2	219	1633971	3
33	N	4	22	2	0	3	1639374	1	253	1639627	14
33	N	4	23	1	0	17	1645179	2	253	1645432	17
33	N	4	24	1	0	19	1650585	2	970	1651555	1
33	N	4	25	2	1	13	1657842	2	262	1658104	8
33	N	4	26	2	0	7	1663180	1	288	1663468	30
33	N	4	27	2	1	3	1668753	2	538	1669291	22
33	N	4	28	2	0	17	1675776	1	432	1676208	16
33	N	4	29	2	1	13	1682182	2	428	1682610	26
33	N	4	30	1	1	8	1687988	1	192	1688180	23
33	N	4	31	1	0	17	1693960	2	200	1694160	9
33	N	4	32	1	1	18	1700300	1	208	1700508	27
33	N	4	33	1	0	3	1706055	2	164	1706219	21
34	N	4	1	1	1	11	1819281	1	630	1819911	33
34	N	4	2	2	1	14	1825237	2	976	1826213	12
34	N	4	3	2	1	15	1831577	2	429	1832006	6
34	N	4	4	2	0	6	1837399	1	816	1838215	14
34	N	4	5	1	0	16	1843605	2	3579	1847184	23
34	N	4	6	1	1	2	1852714	1	402	1853116	17
34	N	4	7	1	0	12	1858219	2	255	1858474	13
34	N	4	8	1	0	12	1864142	2	2923	1867065	5
34	N	4	9	2	1	17	1872650	2	67	1872717	4
34	N	4	10	1	1	17	1878105	1	435	1878540	15
34	N	4	11	1	0	10	1883827	2	557	1884384	29
34	N	4	12	2	1	17	1890884	2	739	1891623	16
34	N	4	13	1	1	13	1897758	1	2802	1900560	27
34	N	4	14	2	1	8	1905615	2	499	1906114	30
34	N	4	15	1	1	9	1911671	1	647	1912318	25
34	N	4	16	2	1	12	1917810	2	708	1918518	18
34	N	4	17	2	0	15	1924233	1	384	1924617	2
34	N	4	18	2	1	14	1929839	2	288	1930127	10
34	N	4	19	1	1	16	1935611	1	2988	1938599	11
34	N	4	20	2	1	9	1943802	2	346	1944148	20
34	N	4	21	1	1	4	1949842	1	632	1950474	7
34	N	4	22	1	1	10	1955831	1	366	1956197	19
34	N	4	23	2	1	12	1961420	2	918	1962338	28
34	N	4	24	2	1	3	1968644	2	510	1969154	8
34	N	4	25	2	1	13	1974699	2	1032	1975731	32
34	N	4	26	1	1	6	1980888	1	707	1981595	1
34	N	4	27	1	1	13	1987712	1	441	1988153	3
34	N	4	28	2	0	3	1994752	1	421	1995173	24
34	N	4	29	1	1	6	2000941	1	639	2001580	9
34	N	4	30	1	1	2	2007114	1	1024	2008138	21
34	N	4	31	2	1	6	2014087	2	1424	2015511	26
34	N	4	32	2	1	12	2020777	2	623	2021400	22
34	N	4	33	1	0	16	2027384	2	495	2027879	31
35	N	3	1	1	1	10	1181515	1	560	1182075	27
35	N	3	2	2	1	10	1187387	2	305	1187692	22
35	N	3	3	1	1	8	1193693	1	310	1194003	31
35	N	3	4	2	0	17	1199716	1	735	1200451	2
35	N	3	5	1	0	18	1206005	2	401	1206406	21
35	N	3	6	2	1	18	1213045	2	481	1213526	24
35	N	3	7	1	1	3	1218617	1	566	1219183	13
35	N	3	8	1	1	10	1224557	1	295	1224852	1
35	N	3	9	2	1	14	1230229	2	277	1230506	6
35	N	3	10	1	1	5	1236285	1	202	1236487	9
35	N	3	11	1	0	4	1242023	2	243	1242266	17
35	N	3	12	1	1	15	1247662	1	279	1247941	19
35	N	3	13	1	1	10	1253701	1	581	1254282	33
35	N	3	14	2	1	18	1260241	2	615	1260856	26
35	N	3	15	2	1	12	1266280	2	272	1266552	18
35	N	3	16	2	1	3	1271919	2	627	1272546	12
35	N	3	17	2	1	3	1278826	2	468	1279294	8
35	N	3	18	1	1	7	1284865	1	223	1285088	25
35	N	3	19	1	1	18	1291204	1	30	1291234	3
35	N	3	20	2	1	4	1297844	2	668	1298512	16
35	N	3	21	1	0	6	1304033	2	274	1304307	11
35	N	3	22	2	1	5	1309355	2	556	1309911	30
35	N	3	23	2	0	5	1315328	1	741	1316069	14
35	N	3	24	1	1	10	1321367	1	597	1321964	29
35	N	3	25	2	1	11	1327189	2	545	1327734	20
35	N	3	26	1	1	3	1333428	1	423	1333851	7
35	N	3	27	2	0	3	1339402	1	267	1339669	32
35	N	3	28	2	1	17	1345257	2	173	1345430	4
35	N	3	29	1	1	8	1350845	1	263	1351108	23
35	N	3	30	2	1	8	1356351	2	1041	1357392	28
35	N	3	31	1	1	3	1363040	1	464	1363504	5
35	N	3	32	2	1	13	1368729	2	735	1369464	10
35	N	3	33	1	1	10	1374852	1	369	1375221	15
36	N	4	1	2	0	6	1418924	1	419	1419343	2
36	N	4	2	2	1	8	1424747	2	499	1425246	14
36	N	4	3	1	1	13	1430502	1	238	1430740	29
36	N	4	4	1	1	12	1435824	1	360	1436184	13
36	N	4	5	1	1	5	1442247	1	897	1443144	3
36	N	4	6	1	1	3	1448686	1	334	1449020	25
36	N	4	7	1	1	8	1454359	1	282	1454641	15
36	N	4	8	1	0	10	1460131	2	205	1460336	11
36	N	4	9	2	1	6	1465653	2	265	1465918	6
36	N	4	10	2	0	15	1471859	1	725	1472584	26
36	N	4	11	1	1	7	1478282	1	204	1478486	33
36	N	4	12	2	1	6	1484721	2	279	1485000	8
36	N	4	13	1	1	10	1490160	1	1217	1491377	1
36	N	4	14	2	1	14	1496950	2	953	1497903	4
36	N	4	15	2	0	15	1503239	1	491	1503730	12
36	N	4	16	1	0	7	1509245	2	197	1509442	21
36	N	4	17	1	1	14	1515418	1	271	1515689	31
36	N	4	18	1	1	4	1521340	1	251	1521591	7
36	N	4	19	2	1	8	1526779	2	298	1527077	10
36	N	4	20	1	1	17	1532467	1	237	1532704	23
36	N	4	21	1	0	17	1538206	2	373	1538579	17
36	N	4	22	1	1	9	1543928	1	301	1544229	19
36	N	4	23	2	0	9	1550785	1	260	1551045	24
36	N	4	24	2	0	10	1556424	1	727	1557151	18
36	N	4	25	2	0	7	1562363	1	560	1562923	28
36	N	4	26	2	1	18	1568185	2	243	1568428	22
36	N	4	27	2	1	3	1574875	2	263	1575138	16
36	N	4	28	2	0	2	1580197	1	722	1580919	30
36	N	4	29	1	0	4	1586670	2	402	1587072	9
36	N	4	30	2	0	12	1592275	1	366	1592641	20
36	N	4	31	1	1	11	1598298	1	215	1598513	5
36	N	4	32	1	1	2	1604537	1	269	1604806	27
36	N	4	33	2	0	4	1610309	1	267	1610576	32
37	N	1	1	1	1	10	1918122	1	1120	1919242	33
37	N	1	2	2	1	7	1924428	2	483	1924911	20
37	N	1	3	1	1	10	1930384	1	201	1930585	11
37	N	1	4	1	0	5	1935722	2	1251	1936973	1
37	N	1	5	2	1	14	1942212	2	217	1942429	22
37	N	1	6	1	1	17	1948067	1	182	1948249	5
37	N	1	7	2	1	4	1954707	2	621	1955328	16
37	N	1	8	2	0	7	1961263	1	813	1962076	26
37	N	1	9	1	1	8	1967653	1	298	1967951	25
37	N	1	10	2	0	15	1973308	1	112	1973420	12
37	N	1	11	2	1	8	1978980	2	2903	1981883	4
37	N	1	12	2	1	13	1987122	2	929	1988051	28
37	N	1	13	2	1	13	1994629	2	289	1994918	24
37	N	1	14	2	0	2	2000551	1	54	2000605	2
37	N	1	15	2	0	13	2006007	1	139	2006146	14
37	N	1	16	1	1	9	2012179	1	357	2012536	27
37	N	1	17	1	0	16	2018068	2	705	2018773	21
37	N	1	18	1	1	11	2024107	1	239	2024346	15
37	N	1	19	1	1	11	2029613	1	224	2029837	29
37	N	1	20	1	1	10	2035819	1	1925	2037744	31
37	N	1	21	1	0	3	2043410	2	830	2044240	7
37	N	1	22	1	0	11	2049615	2	1497	2051112	23
37	N	1	23	2	0	15	2056639	1	239	2056878	32
37	N	1	24	2	0	10	2062261	1	1412	2063673	18
37	N	1	25	1	1	15	2069184	1	981	2070165	17
37	N	1	26	2	1	12	2076475	2	268	2076743	8
37	N	1	27	1	0	17	2082514	2	1128	2083642	9
37	N	1	28	1	0	11	2089721	2	1064	2090785	3
37	N	1	29	1	1	4	2095860	1	381	2096241	13
37	N	1	30	2	1	17	2101582	2	1698	2103280	6
37	N	1	31	2	0	13	2108455	1	352	2108807	10
37	N	1	32	1	1	17	2114178	1	275	2114453	19
37	N	1	33	2	1	4	2119499	2	551	2120050	30
38	N	1	1	1	1	16	2659585	1	864	2660449	15
38	N	1	2	1	1	17	2665874	1	695	2666569	23
38	N	1	3	1	1	5	2672130	1	395	2672525	25
38	N	1	4	1	0	11	2678069	2	1445	2679514	17
38	N	1	5	1	0	10	2685026	2	475	2685501	11
38	N	1	6	1	0	8	2691282	2	463	2691745	9
38	N	1	7	1	1	9	2697104	1	769	2697873	19
38	N	1	8	2	0	6	2704161	1	846	2705007	8
38	N	1	9	1	1	4	2710701	1	502	2711203	7
38	N	1	10	2	0	12	2716723	1	655	2717378	32
38	N	1	11	2	1	18	2722763	2	449	2723212	6
38	N	1	12	2	1	6	2729202	2	414	2729616	26
38	N	1	13	2	1	11	2736125	2	1480	2737605	16
38	N	1	14	1	1	10	2742899	1	635	2743534	29
38	N	1	15	2	0	17	2748971	1	108	2749079	14
38	N	1	16	2	1	8	2754326	2	959	2755285	20
38	N	1	17	1	1	9	2760432	1	1098	2761530	1
38	N	1	18	2	0	5	2767122	1	703	2767825	4
38	N	1	19	2	1	17	2773128	2	684	2773812	22
38	N	1	20	2	0	7	2779050	1	679	2779729	28
38	N	1	21	2	1	3	2784806	2	288	2785094	30
38	N	1	22	1	0	13	2791145	2	67	2791212	27
38	N	1	23	1	0	10	2797318	2	296	2797614	3
38	N	1	24	2	0	16	2802973	1	641	2803614	12
38	N	1	25	2	1	10	2810230	2	317	2810547	24
38	N	1	26	2	1	13	2815769	2	349	2816118	10
38	N	1	27	1	0	17	2821208	2	537	2821745	13
38	N	1	28	1	1	8	2827497	1	1111	2828608	33
38	N	1	29	1	1	4	2834604	1	347	2834951	31
38	N	1	30	1	1	18	2840510	1	1014	2841524	21
38	N	1	31	2	1	9	2846932	2	345	2847277	18
38	N	1	32	2	0	15	2853022	1	487	2853509	2
38	N	1	33	1	1	15	2859178	1	527	2859705	5
39	N	1	1	2	0	2	1911972	1	1717	1913689	2
39	N	1	2	2	0	11	1919630	1	963	1920593	26
39	N	1	3	2	1	19	1925936	2	592	1926528	6
39	N	1	4	2	1	3	1931558	2	1435	1932993	30
39	N	1	5	1	0	15	1938681	2	447	1939128	7
39	N	1	6	1	0	4	1944887	2	123	1945010	9
39	N	1	7	2	1	10	1950409	2	347	1950756	18
39	N	1	8	1	1	14	1956732	1	316	1957048	31
39	N	1	9	2	0	14	1962421	1	380	1962801	12
39	N	1	10	1	1	17	1968844	1	158	1969002	27
39	N	1	11	1	1	3	1974549	1	285	1974834	25
39	N	1	12	1	0	18	1979938	2	1712	1981650	13
39	N	1	13	2	1	17	1986845	2	1120	1987965	10
39	N	1	14	1	1	8	1993317	1	374	1993691	19
39	N	1	15	1	0	8	1999757	2	1273	2001030	3
39	N	1	16	2	0	4	2006397	1	1137	2007534	14
39	N	1	17	2	1	16	2013804	2	251	2014055	8
39	N	1	18	1	0	5	2019543	2	185	2019728	11
39	N	1	19	1	1	10	2025115	1	240	2025355	23
39	N	1	20	1	1	18	2030487	1	658	2031145	1
39	N	1	21	2	0	17	2037627	1	809	2038436	16
39	N	1	22	2	0	18	2045034	1	1668	2046702	24
39	N	1	23	2	0	11	2051924	1	897	2052821	28
39	N	1	24	1	0	7	2058330	2	815	2059145	21
39	N	1	25	1	0	8	2064853	2	337	2065190	33
39	N	1	26	2	1	14	2070375	2	378	2070753	20
39	N	1	27	2	1	5	2076014	2	522	2076536	22
39	N	1	28	2	0	13	2082036	1	239	2082275	32
39	N	1	29	1	0	9	2087792	2	252	2088044	17
39	N	1	30	2	0	10	2093614	1	447	2094061	4
39	N	1	31	1	1	13	2099336	1	588	2099924	29
39	N	1	32	1	1	3	2105259	1	443	2105702	15
39	N	1	33	1	0	14	2111365	2	163	2111528	5
40	N	3	1	2	1	6	1569648	2	312	1569960	30
40	N	3	2	1	1	14	1575670	1	324	1575994	7
40	N	3	3	1	1	17	1581159	1	378	1581537	1
40	N	3	4	1	1	13	1586864	1	444	1587308	29
40	N	3	5	2	0	13	1592837	1	373	1593210	32
40	N	3	6	2	1	15	1598426	2	293	1598719	20
40	N	3	7	1	0	13	1604214	2	227	1604441	11
40	N	3	8	1	0	15	1610454	2	251	1610705	31
40	N	3	9	1	1	15	1616376	1	57	1616433	5
40	N	3	10	2	1	8	1623033	2	704	1623737	24
40	N	3	11	2	1	9	1629038	2	821	1629859	22
40	N	3	12	1	1	6	1635912	1	275	1636187	27
40	N	3	13	2	1	15	1641884	2	382	1642266	2
40	N	3	14	1	0	5	1647990	2	292	1648282	33
40	N	3	15	1	0	9	1653662	2	872	1654534	23
40	N	3	16	2	0	10	1659768	1	333	1660101	10
40	N	3	17	2	0	17	1665474	1	628	1666102	12
40	N	3	18	2	0	11	1672630	1	1055	1673685	16
40	N	3	19	1	0	19	1679454	2	243	1679697	9
40	N	3	20	2	1	3	1685076	2	200	1685276	18
40	N	3	21	2	1	11	1690631	2	236	1690867	6
40	N	3	22	2	1	9	1696287	2	78	1696365	14
40	N	3	23	1	1	9	1701742	1	432	1702174	19
40	N	3	24	1	1	5	1707264	1	495	1707759	13
40	N	3	25	2	0	7	1713687	1	472	1714159	26
40	N	3	26	1	0	10	1719693	2	291	1719984	17
40	N	3	27	2	0	13	1725548	1	303	1725851	4
40	N	3	28	2	1	11	1732138	2	41	1732179	8
40	N	3	29	1	1	11	1737543	1	238	1737781	15
40	N	3	30	1	0	5	1743866	2	201	1744067	3
40	N	3	31	1	0	7	1749638	2	230	1749868	25
40	N	3	32	1	0	16	1755427	2	384	1755811	21
40	N	3	33	2	0	13	1761133	1	438	1761571	28
41	N	3	1	1	1	13	2648715	1	248	2648963	13
41	N	3	2	1	1	18	2654704	1	286	2654990	7
41	N	3	3	2	0	8	2660576	1	826	2661402	4
41	N	3	4	1	0	18	2667199	2	561	2667760	9
41	N	3	5	1	0	5	2672905	2	317	2673222	1
41	N	3	6	2	0	11	2678427	1	247	2678674	28
41	N	3	7	1	1	9	2683982	1	191	2684173	29
41	N	3	8	2	0	7	2689404	1	246	2689650	20
41	N	3	9	1	0	11	2695727	2	843	2696570	27
41	N	3	10	2	0	16	2701766	1	484	2702250	10
41	N	3	11	1	1	4	2707605	1	2244	2709849	19
41	N	3	12	1	0	16	2715379	2	321	2715700	21
41	N	3	13	2	1	7	2721068	2	405	2721473	6
41	N	3	14	2	0	11	2726873	1	148	2727021	14
41	N	3	15	2	0	17	2732395	1	223	2732618	12
41	N	3	16	2	1	5	2738001	2	270	2738271	18
41	N	3	17	2	0	17	2743356	1	429	2743785	30
41	N	3	18	1	1	15	2749195	1	190	2749385	23
41	N	3	19	2	1	11	2755368	2	260	2755628	26
41	N	3	20	2	0	14	2761323	1	494	2761817	2
41	N	3	21	2	1	4	2768414	2	252	2768666	24
41	N	3	22	1	0	17	2774319	2	364	2774683	5
41	N	3	23	2	1	6	2780942	2	258	2781200	8
41	N	3	24	1	0	12	2786748	2	213	2786961	17
41	N	3	25	1	1	3	2792570	1	217	2792787	25
41	N	3	26	1	0	16	2798292	2	220	2798512	11
41	N	3	27	1	1	5	2804498	1	254	2804752	31
41	N	3	28	1	0	6	2810838	2	307	2811145	3
41	N	3	29	2	0	14	2816677	1	108	2816785	32
41	N	3	30	1	1	16	2822165	1	529	2822694	15
41	N	3	31	2	1	5	2827954	2	222	2828176	22
41	N	3	32	1	0	14	2833977	2	301	2834278	33
41	N	3	33	2	1	14	2840783	2	242	2841025	16
42	N	3	1	2	0	9	1274285	1	743	1275028	28
42	N	3	2	1	1	9	1280441	1	161	1280602	23
42	N	3	3	1	0	16	1286380	2	355	1286735	9
42	N	3	4	2	1	8	1292336	2	1173	1293509	4
42	N	3	5	2	1	7	1299059	2	819	1299878	32
42	N	3	6	2	1	8	1305115	2	444	1305559	20
42	N	3	7	1	0	4	1311054	2	126	1311180	11
42	N	3	8	2	1	6	1316460	2	450	1316910	22
42	N	3	9	1	0	10	1323016	2	552	1323568	3
42	N	3	10	2	0	11	1329539	1	5775	1335314	26
42	N	3	11	2	0	3	1341000	1	204	1341204	2
42	N	3	12	1	1	15	1346589	1	1027	1347616	15
42	N	3	13	1	1	12	1353596	1	259	1353855	31
42	N	3	14	1	0	3	1359418	2	252	1359670	25
42	N	3	15	1	0	9	1365224	2	1	1365225	21
42	N	3	16	2	1	7	1370596	2	308	1370904	6
42	N	3	17	1	0	18	1376601	2	379	1376980	5
42	N	3	18	1	1	12	1382090	1	280	1382370	13
42	N	3	19	1	0	18	1388446	2	578	1389024	27
42	N	3	20	2	1	8	1394419	2	814	1395233	18
42	N	3	21	1	1	17	1400625	1	1760	1402385	19
42	N	3	22	2	1	17	1409016	2	1659	1410675	24
42	N	3	23	2	0	10	1415906	1	1035	1416941	10
42	N	3	24	1	0	17	1422262	2	246	1422508	29
42	N	3	25	2	1	4	1428802	2	348	1429150	8
42	N	3	26	2	0	17	1434524	1	248	1434772	12
42	N	3	27	1	1	7	1440497	1	2098	1442595	7
42	N	3	28	1	0	16	1448338	2	189	1448527	33
42	N	3	29	1	0	15	1454077	2	458	1454535	17
42	N	3	30	2	1	3	1459632	2	6719	1466351	30
42	N	3	31	2	0	9	1471777	1	247	1472024	14
42	N	3	32	1	0	3	1477166	2	681	1477847	1
42	N	3	33	2	0	18	1484373	1	242	1484615	16
43	N	4	1	2	1	14	2298862	2	325	2299187	6
43	N	4	2	1	0	8	2304301	2	359	2304660	1
43	N	4	3	1	1	8	2310223	1	308	2310531	25
43	N	4	4	2	0	18	2316196	1	282	2316478	2
43	N	4	5	2	0	13	2322419	1	304	2322723	26
43	N	4	6	1	1	10	2328074	1	59	2328133	23
43	N	4	7	1	0	5	2333646	2	255	2333901	21
43	N	4	8	1	1	2	2339535	1	128	2339663	5
43	N	4	9	1	0	11	2345141	2	786	2345927	11
43	N	4	10	2	0	8	2350980	1	919	2351899	30
43	N	4	11	1	1	11	2357169	1	1746	2358915	29
43	N	4	12	2	0	9	2364126	1	318	2364444	28
43	N	4	13	2	1	7	2369965	2	1371	2371336	32
43	N	4	14	2	1	5	2376688	2	2359	2379047	18
43	N	4	15	2	1	16	2385313	2	282	2385595	8
43	N	4	16	1	1	3	2391619	1	56	2391675	27
43	N	4	17	2	1	14	2398142	2	512	2398654	16
43	N	4	18	2	0	13	2404215	1	285	2404500	4
43	N	4	19	1	1	8	2410204	1	528	2410732	33
43	N	4	20	1	1	15	2416093	1	3122	2419215	19
43	N	4	21	1	1	3	2424868	1	292	2425160	7
43	N	4	22	1	1	11	2430240	1	1475	2431715	13
43	N	4	23	2	0	14	2436897	1	520	2437417	20
43	N	4	24	2	1	4	2443987	2	316	2444303	24
43	N	4	25	1	1	15	2450043	1	3701	2453744	9
43	N	4	26	2	1	3	2459001	2	370	2459371	22
43	N	4	27	2	1	16	2464774	2	1660	2466434	14
43	N	4	28	1	1	17	2471947	1	4860	2476807	17
43	N	4	29	1	1	10	2482758	1	246	2483004	31
43	N	4	30	2	0	5	2488330	1	11575	2499905	12
43	N	4	31	1	1	3	2505964	1	387	2506351	3
43	N	4	32	2	0	18	2511536	1	232	2511768	10
43	N	4	33	1	1	3	2517108	1	126	2517234	15
44	N	2	1	2	1	8	1761820	2	523	1762343	20
44	N	2	2	2	1	5	1767709	2	333	1768042	14
44	N	2	3	2	1	11	1773231	2	1129	1774360	28
44	N	2	4	1	0	3	1779704	2	1395	1781099	19
44	N	2	5	1	0	9	1786577	2	627	1787204	11
44	N	2	6	1	1	5	1792750	1	1444	1794194	25
44	N	2	7	2	0	17	1799690	1	1365	1801055	32
44	N	2	8	1	0	17	1806730	2	1174	1807904	7
44	N	2	9	1	1	8	1813253	1	1026	1814279	23
44	N	2	10	1	1	12	1819626	1	154	1819780	15
44	N	2	11	1	1	8	1825849	1	479	1826328	3
44	N	2	12	2	0	18	1831721	1	693	1832414	18
44	N	2	13	1	1	4	1837944	1	2793	1840737	17
44	N	2	14	1	1	3	1846019	1	452	1846471	29
44	N	2	15	1	0	9	1852191	2	791	1852982	33
44	N	2	16	2	0	5	1858313	1	400	1858713	12
44	N	2	17	2	1	9	1863986	2	472	1864458	22
44	N	2	18	2	1	4	1869791	2	337	1870128	6
44	N	2	19	2	1	16	1876681	2	650	1877331	24
44	N	2	20	2	1	16	1883822	2	363	1884185	16
44	N	2	21	1	0	17	1889928	2	1598	1891526	9
44	N	2	22	1	1	2	1897502	1	675	1898177	31
44	N	2	23	1	1	12	1903841	1	1139	1904980	5
44	N	2	24	2	0	15	1910548	1	512	1911060	4
44	N	2	25	2	0	17	1917021	1	548	1917569	26
44	N	2	26	1	0	3	1923610	2	1768	1925378	27
44	N	2	27	1	0	5	1930500	2	222	1930722	1
44	N	2	28	2	1	11	1936957	2	840	1937797	8
44	N	2	29	2	1	8	1942846	2	861	1943707	30
44	N	2	30	1	1	15	1948785	1	2054	1950839	13
44	N	2	31	1	0	6	1956375	2	4294	1960669	21
44	N	2	32	2	1	18	1966352	2	2342	1968694	2
44	N	2	33	2	1	7	1973859	2	2234	1976093	10
46	N	4	1	1	0	5	2582081	2	307	2582388	17
46	N	4	2	2	0	6	2587954	1	559	2588513	4
46	N	4	3	1	1	13	2593609	1	2573	2596182	13
46	N	4	4	1	1	9	2601884	1	2956	2604840	33
46	N	4	5	2	0	6	2610343	1	385	2610728	32
46	N	4	6	1	1	14	2616782	1	332	2617114	27
46	N	4	7	2	1	18	2623389	2	483	2623872	8
46	N	4	8	2	0	12	2629194	1	288	2629482	12
46	N	4	9	2	1	4	2635951	2	3337	2639288	16
46	N	4	10	2	1	12	2644543	2	473	2645016	22
46	N	4	11	2	0	12	2650415	1	365	2650780	14
46	N	4	12	1	1	13	2656054	1	1492	2657546	29
46	N	4	13	1	0	11	2663194	2	916	2664110	5
46	N	4	14	2	1	4	2669150	2	350	2669500	30
46	N	4	15	2	1	8	2674873	2	539	2675412	18
46	N	4	16	1	1	15	2680762	1	1002	2681764	15
46	N	4	17	2	0	13	2687719	1	436	2688155	26
46	N	4	18	2	0	13	2693357	1	2413	2695770	20
46	N	4	19	2	1	6	2702350	2	400	2702750	24
46	N	4	20	1	1	14	2708139	1	1136	2709275	23
46	N	4	21	2	0	11	2714495	1	604	2715099	28
46	N	4	22	1	1	11	2721068	1	840	2721908	31
46	N	4	23	1	0	18	2727658	2	252	2727910	9
46	N	4	24	1	1	15	2733597	1	306	2733903	7
46	N	4	25	1	0	19	2739036	2	358	2739394	1
46	N	4	26	2	1	15	2744741	2	552	2745293	6
46	N	4	27	2	0	11	2750497	1	771	2751268	10
46	N	4	28	1	1	14	2756636	1	2059	2758695	19
46	N	4	29	1	0	19	2764778	2	243	2765021	3
46	N	4	30	1	0	10	2770550	2	1649	2772199	25
46	N	4	31	1	0	13	2777674	2	2981	2780655	11
46	N	4	32	2	0	16	2786332	1	1053	2787385	2
46	N	4	33	1	1	6	2792905	1	344	2793249	21
47	N	2	1	1	1	10	2035449	1	240	2035689	25
47	N	2	2	1	0	16	2041388	2	5899	2047287	7
47	N	2	3	2	0	7	2052533	1	820	2053353	28
47	N	2	4	1	0	13	2058655	2	174	2058829	29
47	N	2	5	1	0	7	2064561	2	5	2064566	33
47	N	2	6	2	0	14	2070267	1	507	2070774	2
47	N	2	7	1	1	17	2075939	1	394	2076333	1
47	N	2	8	2	0	13	2081928	1	249	2082177	4
47	N	2	9	2	0	8	2088151	1	558	2088709	26
47	N	2	10	2	0	18	2094124	1	262	2094386	14
47	N	2	11	2	1	16	2099729	2	20	2099749	6
47	N	2	12	1	1	16	2105134	1	523	2105657	19
47	N	2	13	1	0	5	2111157	2	179	2111336	11
47	N	2	14	1	0	8	2116879	2	236	2117115	21
47	N	2	15	1	0	9	2123219	2	2552	2125771	3
47	N	2	16	2	1	7	2131060	2	338	2131398	22
47	N	2	17	2	0	16	2136615	1	726	2137341	20
47	N	2	18	1	0	6	2142721	2	219	2142940	23
47	N	2	19	1	0	12	2148944	2	230	2149174	31
47	N	2	20	1	1	7	2155217	1	343	2155560	27
47	N	2	21	1	1	16	2160956	1	451	2161407	15
47	N	2	22	2	1	15	2167913	2	147	2168060	16
47	N	2	23	2	0	17	2173685	1	240	2173925	32
47	N	2	24	1	0	4	2179057	2	343	2179400	13
47	N	2	25	1	0	5	2185163	2	1044	2186207	9
47	N	2	26	2	0	6	2191269	1	966	2192235	30
47	N	2	27	2	1	8	2197458	2	203	2197661	10
47	N	2	28	1	0	3	2203314	2	227	2203541	5
47	N	2	29	2	1	11	2209804	2	226	2210030	8
47	N	2	30	1	0	13	2215576	2	253	2215829	17
47	N	2	31	2	0	3	2222433	1	298	2222731	24
47	N	2	32	2	0	13	2228122	1	262	2228384	18
47	N	2	33	2	0	11	2233727	1	217	2233944	12
48	N	2	1	1	1	17	4002590	1	1869	4004459	21
48	N	2	2	1	0	13	4009981	2	2697	4012678	11
48	N	2	3	1	0	14	4018790	2	2456	4021246	3
48	N	2	4	1	1	16	4026797	1	1928	4028725	17
48	N	2	5	1	1	3	4034789	1	2802	4037591	27
48	N	2	6	1	1	10	4042730	1	1208	4043938	1
48	N	2	7	2	0	5	4049653	1	1766	4051419	2
48	N	2	8	1	1	5	4056510	1	4161	4060671	13
48	N	2	9	1	1	13	4066687	1	1579	4068266	31
48	N	2	10	2	1	14	4073677	2	3237	4076914	18
48	N	2	11	2	1	10	4082135	2	2442	4084577	10
48	N	2	12	1	1	10	4089876	1	1800	4091676	29
48	N	2	13	2	0	18	4098184	1	4624	4102808	16
48	N	2	14	2	0	11	4108244	1	6384	4114628	14
48	N	2	15	2	1	19	4120940	2	2052	4122992	8
48	N	2	16	1	1	7	4128364	1	666	4129030	19
48	N	2	17	2	0	18	4134420	1	558	4134978	12
48	N	2	18	2	0	9	4140526	1	189	4140715	32
48	N	2	19	2	1	9	4146682	2	2539	4149221	26
48	N	2	20	1	1	15	4154907	1	446	4155353	5
48	N	2	21	2	1	7	4160445	2	878	4161323	30
48	N	2	22	1	0	3	4166902	2	2509	4169411	25
48	N	2	23	1	1	4	4174776	1	1036	4175812	15
48	N	2	24	1	1	17	4181199	1	1399	4182598	23
48	N	2	25	2	1	19	4187906	2	228	4188134	22
48	N	2	26	2	0	18	4194762	1	2195	4196957	24
48	N	2	27	2	1	11	4202537	2	4835	4207372	4
48	N	2	28	1	0	9	4213130	2	2045	4215175	33
48	N	2	29	1	1	16	4220888	1	435	4221323	7
48	N	2	30	2	1	17	4226710	2	3611	4230321	6
48	N	2	31	1	0	6	4236086	2	1656	4237742	9
48	N	2	32	2	0	6	4243177	1	1710	4244887	28
48	N	2	33	2	0	8	4250117	1	2182	4252299	20
49	N	1	1	2	0	14	782011	1	572	782583	14
49	N	1	2	2	0	11	787901	1	328	788229	12
49	N	1	3	1	1	16	793940	1	993	794933	33
49	N	1	4	2	0	17	800513	1	929	801442	4
49	N	1	5	2	1	9	806702	2	426	807128	22
49	N	1	6	1	0	14	813209	2	407	813616	3
49	N	1	7	1	1	18	819115	1	878	819993	17
49	N	1	8	2	1	14	825938	2	891	826829	26
49	N	1	9	1	0	3	832194	2	502	832696	23
49	N	1	10	2	1	3	839285	2	804	840089	24
49	N	1	11	2	0	14	845290	1	356	845646	20
49	N	1	12	1	0	15	851163	2	389	851552	21
49	N	1	13	1	1	8	856885	1	369	857254	15
49	N	1	14	1	0	11	862557	2	283	862840	29
49	N	1	15	1	0	12	868480	2	803	869283	5
49	N	1	16	2	1	3	875521	2	544	876065	8
49	N	1	17	1	1	6	882026	1	385	882411	31
49	N	1	18	2	1	6	887765	2	284	888049	18
49	N	1	19	2	0	17	894522	1	385	894907	16
49	N	1	20	2	0	3	900562	1	478	901040	2
49	N	1	21	2	1	14	906384	2	422	906806	6
49	N	1	22	2	0	18	912006	1	608	912614	28
49	N	1	23	2	0	4	918128	1	299	918427	32
49	N	1	24	1	1	12	923784	1	1014	924798	19
49	N	1	25	1	0	17	930290	2	891	931181	11
49	N	1	26	2	1	4	936230	2	783	937013	30
49	N	1	27	2	0	9	942219	1	309	942528	10
49	N	1	28	1	0	15	948208	2	490	948698	7
49	N	1	29	1	0	6	954447	2	178	954625	9
49	N	1	30	1	0	10	960170	2	288	960458	25
49	N	1	31	1	1	7	965592	1	408	966000	1
49	N	1	32	1	1	5	972031	1	585	972616	27
49	N	1	33	1	1	13	977687	1	482	978169	13
50	N	1	1	1	0	8	1018033	2	339	1018372	33
50	N	1	2	1	0	12	1023472	2	324	1023796	13
50	N	1	3	1	0	5	1029144	2	476	1029620	19
50	N	1	4	1	0	3	1034983	2	1053	1036036	15
50	N	1	5	2	0	8	1042007	1	1133	1043140	26
50	N	1	6	2	0	13	1049631	1	437	1050068	16
50	N	1	7	2	0	14	1055453	1	295	1055748	18
50	N	1	8	1	0	16	1061276	2	184	1061460	17
50	N	1	9	2	0	13	1066698	1	522	1067220	28
50	N	1	10	1	0	12	1072487	2	1277	1073764	29
50	N	1	11	2	0	4	1079093	1	351	1079444	12
50	N	1	12	2	0	16	1085149	1	663	1085812	2
50	N	1	13	1	0	11	1090955	2	89	1091044	1
50	N	1	14	2	0	9	1096327	1	429	1096756	22
50	N	1	15	1	0	12	1102516	2	160	1102676	9
50	N	1	16	2	0	19	1108222	1	438	1108660	32
50	N	1	17	2	0	11	1114228	1	32	1114260	4
50	N	1	18	2	0	14	1119483	1	329	1119812	20
50	N	1	19	2	1	16	1125022	2	86	1125108	10
50	N	1	20	1	1	8	1131211	1	25	1131236	3
50	N	1	21	2	1	10	1137501	2	135	1137636	8
50	N	1	22	1	1	18	1143340	1	328	1143668	7
50	N	1	23	1	0	18	1149212	2	200	1149412	21
50	N	1	24	1	1	13	1155068	1	440	1155508	5
50	N	1	25	1	0	12	1160990	2	102	1161092	11
50	N	1	26	1	1	7	1166663	1	236	1166899	25
50	N	1	27	1	0	11	1172935	2	300	1173235	27
50	N	1	28	2	0	18	1178641	1	402	1179043	14
50	N	1	29	2	0	5	1185648	1	323	1185971	24
50	N	1	30	1	0	11	1191353	2	810	1192163	23
50	N	1	31	1	0	12	1198160	2	371	1198531	31
50	N	1	32	2	0	4	1203882	1	649	1204531	6
50	N	1	33	2	1	8	1209605	2	14	1209619	30
51	N	2	1	1	1	3	1635678	1	399	1636077	7
51	N	2	2	2	1	18	1642418	2	1937	1644355	8
51	N	2	3	2	0	13	1649758	1	454	1650212	14
51	N	2	4	1	0	7	1655380	2	373	1655753	1
51	N	2	5	2	0	17	1661119	1	545	1661664	12
51	N	2	6	2	1	9	1666942	2	893	1667835	22
51	N	2	7	1	1	9	1673515	1	410	1673925	25
51	N	2	8	2	1	8	1679904	2	1956	1681860	26
51	N	2	9	1	0	8	1687929	2	323	1688252	3
51	N	2	10	1	0	5	1694102	2	291	1694393	9
51	N	2	11	2	0	17	1700992	1	283	1701275	24
51	N	2	12	1	0	14	1706647	2	2189	1708836	15
51	N	2	13	2	0	9	1714505	1	492	1714997	4
51	N	2	14	1	0	16	1720678	2	1631	1722309	5
51	N	2	15	2	1	10	1727651	2	982	1728633	6
51	N	2	16	1	0	6	1734007	2	650	1734657	23
51	N	2	17	2	1	18	1741231	2	1857	1743088	16
51	N	2	18	2	0	7	1748138	1	572	1748710	30
51	N	2	19	1	1	14	1754444	1	491	1754935	33
51	N	2	20	1	1	13	1760050	1	504	1760554	13
51	N	2	21	2	0	8	1765805	1	2340	1768145	28
51	N	2	22	2	1	11	1773346	2	660	1774006	20
51	N	2	23	1	1	8	1779519	1	369	1779888	11
51	N	2	24	1	0	15	1786059	2	279	1786338	27
51	N	2	25	1	1	6	1791881	1	298	1792179	21
51	N	2	26	1	1	11	1797453	1	1066	1798519	29
51	N	2	27	1	1	7	1803859	1	447	1804306	19
51	N	2	28	1	1	7	1810299	1	799	1811098	31
51	N	2	29	1	1	18	1816639	1	1037	1817676	17
51	N	2	30	2	0	6	1823362	1	352	1823714	2
51	N	2	31	2	0	3	1829251	1	402	1829653	32
51	N	2	32	2	0	7	1834873	1	860	1835733	10
51	N	2	33	2	1	15	1841129	2	291	1841420	18
52	N	1	1	1	1	8	730491	1	379	730870	19
52	N	1	2	2	0	18	736464	1	554	737018	4
52	N	1	3	1	0	10	742520	2	97	742617	11
52	N	1	4	1	0	3	747776	2	26	747802	1
52	N	1	5	2	0	4	754298	1	913	755211	16
52	N	1	6	2	1	17	760437	2	259	760696	20
52	N	1	7	2	0	18	766076	1	129	766205	12
52	N	1	8	1	1	18	771998	1	9	772007	9
52	N	1	9	2	0	7	777270	1	345	777615	28
52	N	1	10	1	1	3	783026	1	591	783617	23
52	N	1	11	1	0	15	789732	2	70	789802	3
52	N	1	12	2	0	5	795188	1	219	795407	18
52	N	1	13	1	0	17	800960	2	1104	802064	21
52	N	1	14	1	0	14	807783	2	232	808015	7
52	N	1	15	2	0	4	814640	1	477	815117	24
52	N	1	16	1	1	10	820863	1	540	821403	33
52	N	1	17	2	1	8	826702	2	1095	827797	22
52	N	1	18	1	0	15	833191	2	216	833407	15
52	N	1	19	1	0	4	838980	2	271	839251	17
52	N	1	20	1	1	9	844552	1	122	844674	29
52	N	1	21	2	0	17	850391	1	305	850696	2
52	N	1	22	1	1	3	856381	1	508	856889	5
52	N	1	23	2	0	18	862420	1	239	862659	32
52	N	1	24	2	0	16	868025	1	0	868025	6
52	N	1	25	2	1	7	874315	2	38	874353	8
52	N	1	26	1	1	12	880354	1	228	880582	31
52	N	1	27	2	0	9	886527	1	339	886866	26
52	N	1	28	1	1	8	892916	1	161	893077	27
52	N	1	29	2	0	9	898321	1	133	898454	10
52	N	1	30	2	1	3	903527	2	341	903868	30
52	N	1	31	2	0	5	909299	1	452	909751	14
52	N	1	32	1	0	3	914854	2	336	915190	13
52	N	1	33	1	1	3	920776	1	814	921590	25
53	N	3	1	2	0	17	2010781	1	2796	2013577	24
53	N	3	2	1	1	12	2018923	1	820	2019743	15
53	N	3	3	2	1	16	2025429	2	259	2025688	2
53	N	3	4	1	1	3	2031318	1	232	2031550	5
53	N	3	5	1	1	15	2037090	1	167	2037257	21
53	N	3	6	1	1	9	2042529	1	312	2042841	29
53	N	3	7	2	1	4	2048101	2	292	2048393	22
53	N	3	8	2	1	8	2053590	2	4159	2057749	20
53	N	3	9	2	1	11	2062949	2	366	2063315	28
53	N	3	10	1	0	10	2068871	2	487	2069358	25
53	N	3	11	1	0	9	2075077	2	204	2075281	33
53	N	3	12	2	1	14	2080649	2	1713	2082362	12
53	N	3	13	1	1	15	2087740	1	252	2087992	23
53	N	3	14	2	1	2	2094229	2	379	2094608	8
53	N	3	15	1	1	3	2099685	1	583	2100268	13
53	N	3	16	1	1	3	2105607	1	197	2105804	19
53	N	3	17	2	1	8	2111129	2	221	2111350	6
53	N	3	18	1	1	4	2116468	1	1830	2118298	1
53	N	3	19	2	1	7	2123358	2	268	2123626	30
53	N	3	20	1	1	8	2129597	1	358	2129955	31
53	N	3	21	2	1	14	2135353	2	577	2135930	14
53	N	3	22	1	1	17	2141959	1	1184	2143143	27
53	N	3	23	2	1	3	2148700	2	286	2148986	4
53	N	3	24	1	0	7	2154505	2	59	2154564	17
53	N	3	25	2	1	4	2159743	2	424	2160167	10
53	N	3	26	2	1	2	2165532	2	238	2165770	18
53	N	3	27	1	0	15	2171254	2	252	2171506	11
53	N	3	28	2	1	8	2177444	2	259	2177703	26
53	N	3	29	2	1	17	2183233	2	739	2183972	32
53	N	3	30	1	0	7	2190039	2	668	2190707	3
53	N	3	31	2	1	12	2197196	2	277	2197473	16
53	N	3	32	1	0	17	2203235	2	812	2204047	9
53	N	3	33	1	1	3	2209692	1	464	2210156	7
54	N	4	1	1	0	6	2307899	2	175	2308074	23
54	N	4	2	2	1	3	2313321	2	388	2313709	28
54	N	4	3	2	1	16	2319094	2	246	2319340	18
54	N	4	4	1	0	12	2324799	2	180	2324979	19
54	N	4	5	2	0	3	2330489	1	492	2330981	32
54	N	4	6	2	0	15	2336677	1	517	2337194	2
54	N	4	7	1	1	16	2342733	1	175	2342908	17
54	N	4	8	1	1	3	2348490	1	342	2348832	25
54	N	4	9	2	0	3	2353894	1	494	2354388	30
54	N	4	10	2	0	17	2359800	1	510	2360310	14
54	N	4	11	1	0	3	2365973	2	132	2366105	5
54	N	4	12	1	0	4	2371378	2	155	2371533	29
54	N	4	13	1	1	15	2377250	1	425	2377675	7
54	N	4	14	1	1	6	2383723	1	557	2384280	27
54	N	4	15	1	1	4	2389379	1	341	2389720	13
54	N	4	16	2	0	18	2395001	1	472	2395473	22
54	N	4	17	1	1	7	2401207	1	5633	2406840	33
54	N	4	18	1	1	7	2412818	1	518	2413336	31
54	N	4	19	1	0	5	2419124	2	236	2419360	9
54	N	4	20	2	0	7	2425313	1	384	2425697	26
54	N	4	21	2	0	17	2431286	1	294	2431580	4
54	N	4	22	1	0	8	2437108	2	233	2437341	21
54	N	4	23	2	0	17	2442714	1	327	2443041	12
54	N	4	24	1	1	13	2448419	1	219	2448638	15
54	N	4	25	2	0	5	2455126	1	426	2455552	16
54	N	4	26	1	1	9	2461632	1	402	2462034	3
54	N	4	27	2	1	10	2468622	2	259	2468881	24
54	N	4	28	1	0	18	2474044	2	470	2474514	1
54	N	4	29	2	1	3	2480785	2	404	2481189	8
54	N	4	30	2	0	8	2486540	1	446	2486986	6
54	N	4	31	2	0	8	2492178	1	682	2492860	20
54	N	4	32	1	1	19	2498385	1	5551	2503936	11
54	N	4	33	2	0	7	2509162	1	551	2509713	10
55	N	3	1	1	0	19	2501905	2	252	2502157	1
55	N	3	2	1	0	17	2507744	2	300	2508044	21
55	N	3	3	1	1	11	2513833	1	308	2514141	9
55	N	3	4	1	0	14	2519688	2	342	2520030	17
55	N	3	5	1	1	11	2525444	1	230	2525674	23
55	N	3	6	1	1	14	2531400	1	203	2531603	7
55	N	3	7	2	1	13	2536905	2	337	2537242	22
55	N	3	8	2	1	6	2543511	2	210	2543721	8
55	N	3	9	1	0	9	2549701	2	342	2550043	31
55	N	3	10	2	0	16	2555640	1	290	2555930	4
55	N	3	11	2	1	15	2561145	2	765	2561910	20
55	N	3	12	2	0	3	2567452	1	389	2567841	32
55	N	3	13	1	1	18	2573257	1	194	2573451	19
55	N	3	14	1	0	8	2579546	2	254	2579800	3
55	N	3	15	2	0	4	2584885	1	323	2585208	30
55	N	3	16	2	0	17	2590607	1	271	2590878	18
55	N	3	17	1	1	7	2596946	1	369	2597315	27
55	N	3	18	2	1	8	2603936	2	270	2604206	24
55	N	3	19	1	1	16	2609592	1	235	2609827	15
55	N	3	20	1	1	15	2614914	1	231	2615145	13
55	N	3	21	2	0	5	2620502	1	379	2620881	12
55	N	3	22	1	0	17	2626558	2	209	2626767	5
55	N	3	23	2	0	11	2631997	1	296	2632293	10
55	N	3	24	1	1	6	2638036	1	180	2638216	33
55	N	3	25	2	1	18	2644743	2	249	2644992	16
55	N	3	26	1	0	10	2650515	2	198	2650713	11
55	N	3	27	1	1	3	2656004	1	326	2656330	29
55	N	3	28	1	0	3	2661926	2	345	2662271	25
55	N	3	29	2	1	18	2668249	2	487	2668736	26
55	N	3	30	2	0	6	2673987	1	798	2674785	28
55	N	3	31	2	0	17	2680510	1	1223	2681733	2
55	N	3	32	2	1	4	2687100	2	301	2687401	6
55	N	3	33	2	1	7	2692822	2	289	2693111	14
56	N	4	1	2	1	3	3378868	2	1828	3380696	4
56	N	4	2	1	1	11	3386058	1	486	3386544	15
56	N	4	3	1	1	5	3391680	1	300	3391980	1
56	N	4	4	1	1	6	3397552	1	341	3397893	25
56	N	4	5	2	1	6	3402957	2	168	3403125	30
56	N	4	6	1	0	3	3408663	2	1177	3409840	21
56	N	4	7	1	1	16	3415553	1	296	3415849	5
56	N	4	8	1	1	13	3421625	1	881	3422506	33
56	N	4	9	1	0	17	3428232	2	438	3428670	7
56	N	4	10	1	1	7	3434855	1	521	3435376	3
56	N	4	11	2	1	10	3441695	2	475	3442170	8
56	N	4	12	2	1	17	3448702	2	325	3449027	16
56	N	4	13	2	0	16	3454440	1	204	3454644	12
56	N	4	14	2	0	12	3460663	1	343	3461006	26
56	N	4	15	1	0	16	3466335	2	692	3467027	29
56	N	4	16	2	0	3	3472458	1	158	3472616	18
56	N	4	17	2	0	7	3477846	1	108	3477954	28
56	N	4	18	2	0	9	3483202	1	878	3484080	20
56	N	4	19	2	0	4	3490693	1	224	3490917	24
56	N	4	20	2	1	18	3496264	2	553	3496817	6
56	N	4	21	1	1	17	3502887	1	817	3503704	27
56	N	4	22	1	0	8	3509227	2	1404	3510631	11
56	N	4	23	2	1	10	3516167	2	1286	3517453	32
56	N	4	24	1	0	6	3523223	2	428	3523651	9
56	N	4	25	2	1	14	3529346	2	581	3529927	2
56	N	4	26	1	1	17	3535018	1	300	3535318	13
56	N	4	27	1	0	19	3541308	2	189	3541497	31
56	N	4	28	2	1	3	3546696	2	332	3547028	10
56	N	4	29	2	1	7	3552318	2	779	3553097	22
56	N	4	30	1	1	14	3558491	1	283	3558774	19
56	N	4	31	1	1	7	3564163	1	291	3564454	23
56	N	4	32	1	0	8	3569985	2	667	3570652	17
56	N	4	33	2	0	7	3576058	1	911	3576969	14
57	N	1	1	1	1	11	5260764	1	434	5261198	15
57	N	1	2	1	1	15	5266853	1	159	5267012	5
57	N	1	3	1	0	3	5272275	2	187	5272462	29
57	N	1	4	1	0	6	5278181	2	2598	5280779	33
57	N	1	5	1	0	15	5286306	2	223	5286529	21
57	N	1	6	2	1	10	5292478	2	439	5292917	26
57	N	1	7	2	1	11	5298117	2	241	5298358	20
57	N	1	8	2	0	5	5304023	1	151	5304174	2
57	N	1	9	1	0	3	5310146	2	304	5310450	31
57	N	1	10	2	0	10	5315984	1	472	5316456	32
57	N	1	11	2	0	15	5322023	1	535	5322558	4
57	N	1	12	2	1	16	5327612	2	539	5328151	30
57	N	1	13	1	0	8	5333668	2	487	5334155	17
57	N	1	14	2	1	12	5340641	2	206	5340847	16
57	N	1	15	2	1	16	5347431	2	187	5347618	24
57	N	1	16	1	0	9	5353671	2	144	5353815	27
57	N	1	17	1	0	16	5359326	2	411	5359737	11
57	N	1	18	1	0	7	5365799	2	140	5365939	3
57	N	1	19	1	0	17	5371304	2	188	5371492	23
57	N	1	20	2	0	5	5376676	1	316	5376992	28
57	N	1	21	2	1	15	5382365	2	92	5382457	18
57	N	1	22	2	0	8	5387854	1	278	5388132	14
57	N	1	23	1	0	9	5393676	2	252	5393928	25
57	N	1	24	2	1	7	5399098	2	272	5399370	10
57	N	1	25	2	1	8	5405621	2	448	5406069	8
57	N	1	26	1	0	7	5411410	2	311	5411721	19
57	N	1	27	1	0	7	5417465	2	208	5417673	9
57	N	1	28	1	0	3	5422804	2	574	5423378	1
57	N	1	29	2	0	3	5428726	1	292	5429018	12
57	N	1	30	2	0	5	5434265	1	704	5434969	22
57	N	1	31	1	0	3	5440622	2	222	5440844	7
57	N	1	32	2	1	17	5446193	2	408	5446601	6
57	N	1	33	1	0	4	5451665	2	234	5451899	13
58	N	3	1	1	0	19	1208988	2	2887	1211875	21
58	N	3	2	1	0	16	1217630	2	2245	1219875	33
58	N	3	3	1	1	9	1225537	1	840	1226377	5
58	N	3	4	2	1	7	1231660	2	1393	1233053	22
58	N	3	5	2	1	8	1238417	2	2337	1240754	12
58	N	3	6	1	0	3	1246041	2	325	1246366	29
58	N	3	7	1	1	9	1251746	1	2743	1254489	15
58	N	3	8	2	0	5	1259737	1	1159	1260896	28
58	N	3	9	2	0	12	1266327	1	1045	1267372	14
58	N	3	10	2	0	16	1272984	1	549	1273533	4
58	N	3	11	2	1	5	1278906	2	131	1279037	6
58	N	3	12	1	1	5	1284178	1	1845	1286023	1
58	N	3	13	1	1	8	1292136	1	2102	1294238	3
58	N	3	14	2	0	17	1299977	1	1785	1301762	2
58	N	3	15	1	1	15	1306883	1	1486	1308369	13
58	N	3	16	2	0	8	1313590	1	1289	1314879	20
58	N	3	17	2	0	12	1321498	1	1339	1322837	24
58	N	3	18	2	0	4	1328388	1	653	1329041	32
58	N	3	19	1	1	13	1335111	1	244	1335355	27
58	N	3	20	1	0	9	1340867	2	267	1341134	11
58	N	3	21	1	1	3	1347139	1	97	1347236	31
58	N	3	22	1	1	18	1352945	1	422	1353367	7
58	N	3	23	2	1	8	1359335	2	1999	1361334	26
58	N	3	24	1	0	10	1366742	2	220	1366962	23
58	N	3	25	2	1	4	1373248	2	433	1373681	8
58	N	3	26	2	0	4	1378754	1	219	1378973	30
58	N	3	27	2	1	8	1385493	2	359	1385852	16
58	N	3	28	2	1	6	1391099	2	739	1391838	10
58	N	3	29	1	0	7	1397388	2	2412	1399800	17
58	N	3	30	2	0	16	1405229	1	233	1405462	18
58	N	3	31	1	1	17	1410868	1	939	1411807	19
58	N	3	32	1	1	5	1417408	1	342	1417750	25
58	N	3	33	1	0	18	1423547	2	31	1423578	9
59	N	3	1	1	0	17	2730590	2	295	2730885	7
59	N	3	2	1	0	18	2736412	2	498	2736910	17
59	N	3	3	2	1	12	2742268	2	215	2742483	6
59	N	3	4	1	0	18	2748024	2	237	2748261	21
59	N	3	5	1	1	7	2754280	1	224	2754504	31
59	N	3	6	2	0	11	2760085	1	266	2760351	4
59	N	3	7	1	1	15	2766408	1	214	2766622	27
59	N	3	8	2	0	3	2772298	1	251	2772549	2
59	N	3	9	1	1	3	2778637	1	198	2778835	3
59	N	3	10	2	0	16	2784359	1	254	2784613	32
59	N	3	11	1	0	12	2790348	2	206	2790554	33
59	N	3	12	2	1	3	2796821	2	256	2797077	8
59	N	3	13	1	0	10	2802577	2	170	2802747	11
59	N	3	14	2	1	18	2808132	2	237	2808369	18
59	N	3	15	2	0	17	2813454	1	324	2813778	30
59	N	3	16	1	0	4	2819160	2	277	2819437	23
59	N	3	17	1	1	11	2824582	1	374	2824956	1
59	N	3	18	2	0	4	2830304	1	193	2830497	12
59	N	3	19	1	0	3	2835576	2	671	2836247	13
59	N	3	20	2	1	11	2841465	2	325	2841790	20
59	N	3	21	2	1	18	2847070	2	200	2847270	22
59	N	3	22	1	0	18	2852576	2	122	2852698	29
59	N	3	23	2	0	13	2857914	1	264	2858178	28
59	N	3	24	2	0	4	2864671	1	244	2864915	16
59	N	3	25	2	1	7	2870109	2	392	2870501	10
59	N	3	26	1	1	10	2876065	1	87	2876152	25
59	N	3	27	1	0	5	2881921	2	372	2882293	9
59	N	3	28	1	1	18	2888060	1	212	2888272	5
59	N	3	29	2	1	9	2894867	2	323	2895190	24
59	N	3	30	1	0	3	2900540	2	237	2900777	19
59	N	3	31	2	0	6	2906161	1	305	2906466	14
59	N	3	32	1	0	10	2911833	2	50	2911883	15
59	N	3	33	2	0	12	2917839	1	226	2918065	26
60	N	4	1	2	1	4	3952253	2	335	3952588	30
60	N	4	2	2	1	7	3957975	2	420	3958395	14
60	N	4	3	2	1	14	3963630	2	333	3963963	28
60	N	4	4	2	1	9	3969253	2	301	3969554	22
60	N	4	5	1	1	16	3975609	1	248	3975857	27
60	N	4	6	1	1	3	3981214	1	278	3981492	19
60	N	4	7	1	1	16	3987170	1	321	3987491	5
60	N	4	8	2	0	17	3993093	1	344	3993437	4
60	N	4	9	2	1	4	4000049	2	305	4000354	24
60	N	4	10	2	1	4	4006622	2	301	4006923	8
60	N	4	11	1	1	3	4012695	1	262	4012957	9
60	N	4	12	1	1	4	4018334	1	313	4018647	15
60	N	4	13	1	0	8	4024139	2	288	4024427	11
60	N	4	14	1	0	3	4029813	2	271	4030084	23
60	N	4	15	2	1	15	4035300	2	222	4035522	20
60	N	4	16	2	0	11	4041056	1	286	4041342	32
60	N	4	17	1	1	16	4046628	1	269	4046897	29
60	N	4	18	2	1	8	4052867	2	384	4053251	26
60	N	4	19	2	0	3	4058440	1	482	4058922	10
60	N	4	20	1	1	18	4064062	1	1544	4065606	13
60	N	4	21	2	1	16	4070968	2	473	4071441	6
60	N	4	22	1	1	18	4077441	1	267	4077708	31
60	N	4	23	1	1	5	4083381	1	319	4083700	7
60	N	4	24	1	0	16	4089253	2	334	4089587	21
60	N	4	25	2	0	9	4094925	1	389	4095314	12
60	N	4	26	1	1	18	4101415	1	659	4102074	3
60	N	4	27	2	1	4	4107771	2	346	4108117	2
60	N	4	28	1	1	8	4113677	1	274	4113951	25
60	N	4	29	2	1	5	4119332	2	646	4119978	18
60	N	4	30	2	1	14	4126473	2	318	4126791	16
60	N	4	31	1	0	18	4132328	2	141	4132469	17
60	N	4	32	1	0	4	4137617	2	508	4138125	1
60	N	4	33	1	0	6	4143856	2	277	4144133	33
61	N	2	1	1	1	12	1174584	1	358	1174942	19
61	N	2	2	2	0	2	1180273	1	1110	1181383	12
61	N	2	3	1	0	4	1186746	2	466	1187212	23
61	N	2	4	1	0	5	1193269	2	1445	1194714	3
61	N	2	5	2	1	3	1200042	2	473	1200515	6
61	N	2	6	2	1	4	1205915	2	1421	1207336	14
61	N	2	7	2	0	2	1212405	1	824	1213229	30
61	N	2	8	1	1	3	1218978	1	67	1219045	9
61	N	2	9	1	0	2	1224199	2	455	1224654	1
61	N	2	10	2	0	10	1230038	1	552	1230590	18
61	N	2	11	1	0	6	1235977	2	875	1236852	15
61	N	2	12	2	1	15	1242050	2	436	1242486	10
61	N	2	13	2	1	8	1249073	2	356	1249429	24
61	N	2	14	1	0	15	1255063	2	346	1255409	11
61	N	2	15	2	1	9	1260685	2	396	1261081	22
61	N	2	16	2	1	11	1267341	2	915	1268256	8
61	N	2	17	1	1	4	1273948	1	310	1274258	7
61	N	2	18	2	0	14	1279870	1	244	1280114	4
61	N	2	19	2	0	17	1285359	1	1402	1286761	20
61	N	2	20	1	0	18	1291932	2	1233	1293165	13
61	N	2	21	2	0	11	1298772	1	449	1299221	32
61	N	2	22	2	1	11	1305812	2	571	1306383	16
61	N	2	23	1	1	9	1312352	1	148	1312500	31
61	N	2	24	1	0	12	1318024	2	143	1318167	17
61	N	2	25	1	0	7	1323880	2	2107	1325987	33
61	N	2	26	1	0	17	1331621	2	388	1332009	21
61	N	2	27	1	1	16	1337360	1	479	1337839	29
61	N	2	28	1	0	16	1343983	2	951	1344934	27
61	N	2	29	2	1	13	1350156	2	1232	1351388	28
61	N	2	30	1	0	11	1357113	2	227	1357340	5
61	N	2	31	1	0	8	1363002	2	308	1363310	25
61	N	2	32	2	1	13	1369458	2	551	1370009	26
61	N	2	33	2	0	5	1375697	1	282	1375979	2
62	N	3	1	2	1	4	5048091	2	317	5048408	28
62	N	3	2	2	0	17	5053763	1	348	5054111	12
62	N	3	3	1	1	10	5059252	1	247	5059499	1
62	N	3	4	1	1	4	5064874	1	197	5065071	23
62	N	3	5	1	1	3	5070429	1	220	5070649	19
62	N	3	6	1	0	6	5076202	2	275	5076477	21
62	N	3	7	1	0	14	5082224	2	324	5082548	5
62	N	3	8	1	1	4	5088614	1	246	5088860	3
62	N	3	9	1	1	12	5094169	1	268	5094437	29
62	N	3	10	2	1	10	5099825	2	281	5100106	18
62	N	3	11	1	1	15	5105814	1	244	5106058	7
62	N	3	12	1	0	11	5111570	2	213	5111783	11
62	N	3	13	1	0	12	5117392	2	218	5117610	17
62	N	3	14	2	1	4	5123865	2	237	5124102	8
62	N	3	15	1	1	17	5129871	1	198	5130069	9
62	N	3	16	2	1	13	5136044	2	334	5136378	26
62	N	3	17	1	0	12	5142433	2	230	5142663	27
62	N	3	18	2	1	17	5147822	2	378	5148200	30
62	N	3	19	1	1	12	5153678	1	189	5153867	15
[truncated: 2,126 more rows]
