# Supplementary material for: Humans read emotional arousal in monkey vocalizations: evidence for evolutionary continuities in communication
Source: PeerJ. 2022 Dec 1;10:e14471. doi: 10.7717/peerj.14471 (PMC9744152; doi:10.7717/peerj.14471)
Supplement: Supplemental Information 3 [file peerj-10-14471-s003.xlsx]

## Sheet: Supplementary data - Screams
	SoundFile	Subject	Experienced	Block	BlockPresentationOrder	Trial	CorrectAnswer	Accurate	Response	ReactionTime	Age	Sex	NativeLanguage	WorkWAnimals	Species	MonthsWAnimals	MonthsWRhesus	CloseRelationshipAnimal	EQ	AAS	Notes	CAM_Face	CAM_Voice	CAM_Total	AccuracyScore_AllCoos	AccuraxyScore_AllMixed	AccuracyScore_AllScreams	LowArousal	HighArousal	FileName_FirstCall	Duration.x	Start.F0.x	End.F0.x	TofMax_s.x	TofMax_prop.x	MinF0.x	MaxF0.x	F0Range.x	MeanF0.x	StDevF0.x	X.Voiced.x	Jitter.x	Shimmer.x	MaxHNR.x	MeanHNR.x	StDevHNR.x	DFA25.x	DFA50.x	DFA75.x
1	RAv17_01	99	N	1	2	23	2	1	2	461	19	F	English + Hindi	N			NA	Y	56	37		37	39	76	0.595238	0.30303	0.461538	5.12.17_01_02.10_av17_scrms_1st bout	Hair_12.9.16_01_3.22_av17_scrmxxxx	5.12.17_01_02.10_av17_scrms_1st bout.wav	0.297	6084	3401	0.126	0.424242	2953.5	7357.9	4404.4	4981.8	1437.09	86.7	3.92e-05	1.94237	29.81	1.58	2.79	5943.2	6976.8	8871.7
2	RAv17_01	2	N	1	1	26	2	1	2	447	19	F	English	N			NA	Y	49	42		36	37	73	0.595238	0.0606061	0.641026	5.12.17_01_02.10_av17_scrms_1st bout	Hair_12.9.16_01_3.22_av17_scrmxxxx	5.12.17_01_02.10_av17_scrms_1st bout.wav	0.297	6084	3401	0.126	0.424242	2953.5	7357.9	4404.4	4981.8	1437.09	86.7	3.92e-05	1.94237	29.81	1.58	2.79	5943.2	6976.8	8871.7
3	RAv17_01	46	N	1	1	10	2	1	2	498	18	F	English	N			NA	Y	45	25		39	42	81	0.619048	0.515152	0.589744	5.12.17_01_02.10_av17_scrms_1st bout	Hair_12.9.16_01_3.22_av17_scrmxxxx	5.12.17_01_02.10_av17_scrms_1st bout.wav	0.297	6084	3401	0.126	0.424242	2953.5	7357.9	4404.4	4981.8	1437.09	86.7	3.92e-05	1.94237	29.81	1.58	2.79	5943.2	6976.8	8871.7
4	RAv17_01	72	N	1	1	8	2	1	2	841	19	F	English	N			NA	Y	48	33		35	31	66	0.511905	0.69697	0.538462	5.12.17_01_02.10_av17_scrms_1st bout	Hair_12.9.16_01_3.22_av17_scrmxxxx	5.12.17_01_02.10_av17_scrms_1st bout.wav	0.297	6084	3401	0.126	0.424242	2953.5	7357.9	4404.4	4981.8	1437.09	86.7	3.92e-05	1.94237	29.81	1.58	2.79	5943.2	6976.8	8871.7
5	RAv17_01	101	N	1	1	36	2	0	1	1616	19	F	English	Y	mice	11	NA	Y	50	40		43	43	86	0.690476	0.484848	0.487179	5.12.17_01_02.10_av17_scrms_1st bout	Hair_12.9.16_01_3.22_av17_scrmxxxx	5.12.17_01_02.10_av17_scrms_1st bout.wav	0.297	6084	3401	0.126	0.424242	2953.5	7357.9	4404.4	4981.8	1437.09	86.7	3.92e-05	1.94237	29.81	1.58	2.79	5943.2	6976.8	8871.7
6	RAv17_01	105	N	1	4	31	2	1	2	1523	19	F	English	N			NA	Y	44	36		40	42	82	0.571429	0.606061	0.435897	5.12.17_01_02.10_av17_scrms_1st bout	Hair_12.9.16_01_3.22_av17_scrmxxxx	5.12.17_01_02.10_av17_scrms_1st bout.wav	0.297	6084	3401	0.126	0.424242	2953.5	7357.9	4404.4	4981.8	1437.09	86.7	3.92e-05	1.94237	29.81	1.58	2.79	5943.2	6976.8	8871.7
7	RAv17_01	39	N	1	4	14	2	1	2	250	19	F	Spanish/English	N			NA	Y	55	38		41	43	84	0.583333	0.454545	0.538462	5.12.17_01_02.10_av17_scrms_1st bout	Hair_12.9.16_01_3.22_av17_scrmxxxx	5.12.17_01_02.10_av17_scrms_1st bout.wav	0.297	6084	3401	0.126	0.424242	2953.5	7357.9	4404.4	4981.8	1437.09	86.7	3.92e-05	1.94237	29.81	1.58	2.79	5943.2	6976.8	8871.7
8	RAv17_01	111	N	1	2	25	2	1	2	862	21	F	English	N			NA	N	39	39		40	36	76	0.511905	0.575758	0.512821	5.12.17_01_02.10_av17_scrms_1st bout	Hair_12.9.16_01_3.22_av17_scrmxxxx	5.12.17_01_02.10_av17_scrms_1st bout.wav	0.297	6084	3401	0.126	0.424242	2953.5	7357.9	4404.4	4981.8	1437.09	86.7	3.92e-05	1.94237	29.81	1.58	2.79	5943.2	6976.8	8871.7
9	RAv17_01	37	N	1	4	11	2	0	1	1914	19	F	Spanish	N			NA	Y	44	32		NA	NA	NA	0.52381	0.606061	0.641026	5.12.17_01_02.10_av17_scrms_1st bout	Hair_12.9.16_01_3.22_av17_scrmxxxx	5.12.17_01_02.10_av17_scrms_1st bout.wav	0.297	6084	3401	0.126	0.424242	2953.5	7357.9	4404.4	4981.8	1437.09	86.7	3.92e-05	1.94237	29.81	1.58	2.79	5943.2	6976.8	8871.7
10	RAv17_01	34	N	1	1	10	2	1	2	243	24	M	Mandarin	N			NA	N	15	37		NA	NA	NA	0.511905	0.757576	0.282051	5.12.17_01_02.10_av17_scrms_1st bout	Hair_12.9.16_01_3.22_av17_scrmxxxx	5.12.17_01_02.10_av17_scrms_1st bout.wav	0.297	6084	3401	0.126	0.424242	2953.5	7357.9	4404.4	4981.8	1437.09	86.7	3.92e-05	1.94237	29.81	1.58	2.79	5943.2	6976.8	8871.7
11	RAv17_01	81	N	1	2	38	2	1	2	1193	18	F	English	N			NA	Y	53	33		43	51	94	0.690476	0.454545	0.538462	5.12.17_01_02.10_av17_scrms_1st bout	Hair_12.9.16_01_3.22_av17_scrmxxxx	5.12.17_01_02.10_av17_scrms_1st bout.wav	0.297	6084	3401	0.126	0.424242	2953.5	7357.9	4404.4	4981.8	1437.09	86.7	3.92e-05	1.94237	29.81	1.58	2.79	5943.2	6976.8	8871.7
12	RAv17_01	91	N	1	4	2	2	1	2	616	20	F	Chinese	N			NA	N	49	36		NA	NA	NA	0.547619	0.606061	0.641026	5.12.17_01_02.10_av17_scrms_1st bout	Hair_12.9.16_01_3.22_av17_scrmxxxx	5.12.17_01_02.10_av17_scrms_1st bout.wav	0.297	6084	3401	0.126	0.424242	2953.5	7357.9	4404.4	4981.8	1437.09	86.7	3.92e-05	1.94237	29.81	1.58	2.79	5943.2	6976.8	8871.7
13	RAv17_01	115	N	1	1	37	2	1	2	341	18	M	Mandarin	N			NA	N	31	37		NA	NA	NA	0.583333	0.575758	0.461538	5.12.17_01_02.10_av17_scrms_1st bout	Hair_12.9.16_01_3.22_av17_scrmxxxx	5.12.17_01_02.10_av17_scrms_1st bout.wav	0.297	6084	3401	0.126	0.424242	2953.5	7357.9	4404.4	4981.8	1437.09	86.7	3.92e-05	1.94237	29.81	1.58	2.79	5943.2	6976.8	8871.7
14	RAv17_01	14	N	1	4	14	2	1	2	1312	19	M	English and Mandarin	N			NA	N	43	35		32	39	71	0.642857	0.818182	0.615385	5.12.17_01_02.10_av17_scrms_1st bout	Hair_12.9.16_01_3.22_av17_scrmxxxx	5.12.17_01_02.10_av17_scrms_1st bout.wav	0.297	6084	3401	0.126	0.424242	2953.5	7357.9	4404.4	4981.8	1437.09	86.7	3.92e-05	1.94237	29.81	1.58	2.79	5943.2	6976.8	8871.7
15	RAv17_01	71	N	1	1	32	2	1	2	750	19	M	English	N			NA	Y	44	36		43	43	86	0.595238	0.424242	0.333333	5.12.17_01_02.10_av17_scrms_1st bout	Hair_12.9.16_01_3.22_av17_scrmxxxx	5.12.17_01_02.10_av17_scrms_1st bout.wav	0.297	6084	3401	0.126	0.424242	2953.5	7357.9	4404.4	4981.8	1437.09	86.7	3.92e-05	1.94237	29.81	1.58	2.79	5943.2	6976.8	8871.7
16	RAv17_01	5	N	1	1	15	2	0	1	2308	29	F	English	Y	cat, dog, horse, cow	6+ years	NA	Y	41	35		46	49	95	0.583333	0.393939	0.564103	5.12.17_01_02.10_av17_scrms_1st bout	Hair_12.9.16_01_3.22_av17_scrmxxxx	5.12.17_01_02.10_av17_scrms_1st bout.wav	0.297	6084	3401	0.126	0.424242	2953.5	7357.9	4404.4	4981.8	1437.09	86.7	3.92e-05	1.94237	29.81	1.58	2.79	5943.2	6976.8	8871.7
17	RAv17_01	87	N	1	1	29	2	1	2	1366	19	F	Korean	N			NA	Y	53	41		NA	NA	NA	0.654762	0.787879	0.615385	5.12.17_01_02.10_av17_scrms_1st bout	Hair_12.9.16_01_3.22_av17_scrmxxxx	5.12.17_01_02.10_av17_scrms_1st bout.wav	0.297	6084	3401	0.126	0.424242	2953.5	7357.9	4404.4	4981.8	1437.09	86.7	3.92e-05	1.94237	29.81	1.58	2.79	5943.2	6976.8	8871.7
18	RAv17_01	54	N	1	3	31	2	1	2	337	18	F	Chinese	N			NA	N	35	41		NA	NA	NA	0.535714	0.424242	0.538462	5.12.17_01_02.10_av17_scrms_1st bout	Hair_12.9.16_01_3.22_av17_scrmxxxx	5.12.17_01_02.10_av17_scrms_1st bout.wav	0.297	6084	3401	0.126	0.424242	2953.5	7357.9	4404.4	4981.8	1437.09	86.7	3.92e-05	1.94237	29.81	1.58	2.79	5943.2	6976.8	8871.7
19	RAv17_01	8	N	1	3	11	2	0	1	688	19	F	English	Y	dogs, cats	24	NA	Y	58	40		39	43	82	0.595238	0.363636	0.589744	5.12.17_01_02.10_av17_scrms_1st bout	Hair_12.9.16_01_3.22_av17_scrmxxxx	5.12.17_01_02.10_av17_scrms_1st bout.wav	0.297	6084	3401	0.126	0.424242	2953.5	7357.9	4404.4	4981.8	1437.09	86.7	3.92e-05	1.94237	29.81	1.58	2.79	5943.2	6976.8	8871.7
20	RAv17_01	96	N	1	4	32	2	1	2	415	18	F	English	N			NA	Y	59	39		44	47	91	0.583333	0.727273	0.512821	5.12.17_01_02.10_av17_scrms_1st bout	Hair_12.9.16_01_3.22_av17_scrmxxxx	5.12.17_01_02.10_av17_scrms_1st bout.wav	0.297	6084	3401	0.126	0.424242	2953.5	7357.9	4404.4	4981.8	1437.09	86.7	3.92e-05	1.94237	29.81	1.58	2.79	5943.2	6976.8	8871.7
21	RAv17_01	3	N	1	1	6	2	0	1	2613	28	M	English	N			NA	Y	39	30		45	42	87	0.559524	0.575758	0.487179	5.12.17_01_02.10_av17_scrms_1st bout	Hair_12.9.16_01_3.22_av17_scrmxxxx	5.12.17_01_02.10_av17_scrms_1st bout.wav	0.297	6084	3401	0.126	0.424242	2953.5	7357.9	4404.4	4981.8	1437.09	86.7	3.92e-05	1.94237	29.81	1.58	2.79	5943.2	6976.8	8871.7
22	RAv17_01	41	N	1	2	3	2	1	2	649	20	M	Vietnamese	N			NA	Y	45	29		NA	NA	NA	0.630952	0.454545	0.435897	5.12.17_01_02.10_av17_scrms_1st bout	Hair_12.9.16_01_3.22_av17_scrmxxxx	5.12.17_01_02.10_av17_scrms_1st bout.wav	0.297	6084	3401	0.126	0.424242	2953.5	7357.9	4404.4	4981.8	1437.09	86.7	3.92e-05	1.94237	29.81	1.58	2.79	5943.2	6976.8	8871.7
23	RAv17_01	102	N	1	3	20	2	1	2	710	18	F	English	Y	elephants, dogs, tortoises	3	NA	Y	46	44		33	36	69	0.559524	0.424242	0.461538	5.12.17_01_02.10_av17_scrms_1st bout	Hair_12.9.16_01_3.22_av17_scrmxxxx	5.12.17_01_02.10_av17_scrms_1st bout.wav	0.297	6084	3401	0.126	0.424242	2953.5	7357.9	4404.4	4981.8	1437.09	86.7	3.92e-05	1.94237	29.81	1.58	2.79	5943.2	6976.8	8871.7
24	RAv17_01	58	N	1	2	36	2	1	2	487	21	F	Spanish	Y	mice, rats	2	NA	Y	53	33		NA	NA	NA	0.547619	0.515152	0.461538	5.12.17_01_02.10_av17_scrms_1st bout	Hair_12.9.16_01_3.22_av17_scrmxxxx	5.12.17_01_02.10_av17_scrms_1st bout.wav	0.297	6084	3401	0.126	0.424242	2953.5	7357.9	4404.4	4981.8	1437.09	86.7	3.92e-05	1.94237	29.81	1.58	2.79	5943.2	6976.8	8871.7
25	RAv17_01	69	N	1	1	39	2	1	2	496	20	F	English	N			NA	Y	40	37		42	43	85	0.547619	0.424242	0.615385	5.12.17_01_02.10_av17_scrms_1st bout	Hair_12.9.16_01_3.22_av17_scrmxxxx	5.12.17_01_02.10_av17_scrms_1st bout.wav	0.297	6084	3401	0.126	0.424242	2953.5	7357.9	4404.4	4981.8	1437.09	86.7	3.92e-05	1.94237	29.81	1.58	2.79	5943.2	6976.8	8871.7
26	RAv17_01	506	Y	1	3	3	2	1	2	946	37	F	English	Y	Rhesus macaque	120	120	Y	NA	NA		NA	NA	NA	0.559524	0.424242	0.487179	5.12.17_01_02.10_av17_scrms_1st bout	Hair_12.9.16_01_3.22_av17_scrmxxxx	5.12.17_01_02.10_av17_scrms_1st bout.wav	0.297	6084	3401	0.126	0.424242	2953.5	7357.9	4404.4	4981.8	1437.09	86.7	3.92e-05	1.94237	29.81	1.58	2.79	5943.2	6976.8	8871.7
27	RAv17_01	83	N	1	4	8	2	0	1	407	19	F	English	N			NA	Y	55	46		48	46	94	0.5	0.333333	0.487179	5.12.17_01_02.10_av17_scrms_1st bout	Hair_12.9.16_01_3.22_av17_scrmxxxx	5.12.17_01_02.10_av17_scrms_1st bout.wav	0.297	6084	3401	0.126	0.424242	2953.5	7357.9	4404.4	4981.8	1437.09	86.7	3.92e-05	1.94237	29.81	1.58	2.79	5943.2	6976.8	8871.7
28	RAv17_01	61	N	1	3	14	2	1	2	322	19	M	English	N			NA	Y	42	36		43	35	78	0.619048	0.424242	0.461538	5.12.17_01_02.10_av17_scrms_1st bout	Hair_12.9.16_01_3.22_av17_scrmxxxx	5.12.17_01_02.10_av17_scrms_1st bout.wav	0.297	6084	3401	0.126	0.424242	2953.5	7357.9	4404.4	4981.8	1437.09	86.7	3.92e-05	1.94237	29.81	1.58	2.79	5943.2	6976.8	8871.7
29	RAv17_01	16	N	1	2	7	2	1	2	437	21	F	English	Y	dogs, cats	6	NA	Y	44	43		38	40	78	0.559524	0.545455	0.461538	5.12.17_01_02.10_av17_scrms_1st bout	Hair_12.9.16_01_3.22_av17_scrmxxxx	5.12.17_01_02.10_av17_scrms_1st bout.wav	0.297	6084	3401	0.126	0.424242	2953.5	7357.9	4404.4	4981.8	1437.09	86.7	3.92e-05	1.94237	29.81	1.58	2.79	5943.2	6976.8	8871.7
30	RAv17_01	24	N	1	4	30	2	0	1	657	20	M	English	N			NA	N	41	24		35	36	71	0.404762	0.363636	0.666667	5.12.17_01_02.10_av17_scrms_1st bout	Hair_12.9.16_01_3.22_av17_scrmxxxx	5.12.17_01_02.10_av17_scrms_1st bout.wav	0.297	6084	3401	0.126	0.424242	2953.5	7357.9	4404.4	4981.8	1437.09	86.7	3.92e-05	1.94237	29.81	1.58	2.79	5943.2	6976.8	8871.7
31	RAv17_01	93	N	1	2	12	2	1	2	467	19	F	English	N			NA	Y	53	37		38	38	76	0.52381	0.30303	0.487179	5.12.17_01_02.10_av17_scrms_1st bout	Hair_12.9.16_01_3.22_av17_scrmxxxx	5.12.17_01_02.10_av17_scrms_1st bout.wav	0.297	6084	3401	0.126	0.424242	2953.5	7357.9	4404.4	4981.8	1437.09	86.7	3.92e-05	1.94237	29.81	1.58	2.79	5943.2	6976.8	8871.7
32	RAv17_01	10	N	1	2	39	2	0	1	4662	21	F	English	N			NA	Y	50	38		36	38	74	0.559524	0.757576	0.358974	5.12.17_01_02.10_av17_scrms_1st bout	Hair_12.9.16_01_3.22_av17_scrmxxxx	5.12.17_01_02.10_av17_scrms_1st bout.wav	0.297	6084	3401	0.126	0.424242	2953.5	7357.9	4404.4	4981.8	1437.09	86.7	3.92e-05	1.94237	29.81	1.58	2.79	5943.2	6976.8	8871.7
33	RAv17_01	48	N	1	3	28	2	0	1	1776	19	F	English	N			NA	Y	33	36		36	46	82	0.654762	0.606061	0.564103	5.12.17_01_02.10_av17_scrms_1st bout	Hair_12.9.16_01_3.22_av17_scrmxxxx	5.12.17_01_02.10_av17_scrms_1st bout.wav	0.297	6084	3401	0.126	0.424242	2953.5	7357.9	4404.4	4981.8	1437.09	86.7	3.92e-05	1.94237	29.81	1.58	2.79	5943.2	6976.8	8871.7
34	RAv17_01	94	N	1	3	3	2	1	2	385	20	F	English	N			NA	Y	45	44		40	44	84	0.72619	0.878788	0.410256	5.12.17_01_02.10_av17_scrms_1st bout	Hair_12.9.16_01_3.22_av17_scrmxxxx	5.12.17_01_02.10_av17_scrms_1st bout.wav	0.297	6084	3401	0.126	0.424242	2953.5	7357.9	4404.4	4981.8	1437.09	86.7	3.92e-05	1.94237	29.81	1.58	2.79	5943.2	6976.8	8871.7
35	RAv17_01	82	N	1	1	26	2	1	2	535	18	F	Korean	Y	dogs, cats	3	NA	Y	31	40		NA	NA	NA	0.559524	0.333333	0.641026	5.12.17_01_02.10_av17_scrms_1st bout	Hair_12.9.16_01_3.22_av17_scrmxxxx	5.12.17_01_02.10_av17_scrms_1st bout.wav	0.297	6084	3401	0.126	0.424242	2953.5	7357.9	4404.4	4981.8	1437.09	86.7	3.92e-05	1.94237	29.81	1.58	2.79	5943.2	6976.8	8871.7
36	RAv17_01	508	Y	1	1	4	2	0	1	1929	40	F	English	Y	Rhesus macaque, pigtail macaque, sooty mangabey	192	120	Y	NA	NA		NA	NA	NA	0.511905	0.969697	0.641026	5.12.17_01_02.10_av17_scrms_1st bout	Hair_12.9.16_01_3.22_av17_scrmxxxx	5.12.17_01_02.10_av17_scrms_1st bout.wav	0.297	6084	3401	0.126	0.424242	2953.5	7357.9	4404.4	4981.8	1437.09	86.7	3.92e-05	1.94237	29.81	1.58	2.79	5943.2	6976.8	8871.7
37	RAv17_01	62	N	1	1	2	2	1	2	316	18	F	English	Y	mice	1	NA	Y	59	32		46	40	86	0.559524	0.484848	0.538462	5.12.17_01_02.10_av17_scrms_1st bout	Hair_12.9.16_01_3.22_av17_scrmxxxx	5.12.17_01_02.10_av17_scrms_1st bout.wav	0.297	6084	3401	0.126	0.424242	2953.5	7357.9	4404.4	4981.8	1437.09	86.7	3.92e-05	1.94237	29.81	1.58	2.79	5943.2	6976.8	8871.7
38	RAv17_01	23	N	1	2	26	2	1	2	675	20	F	Mandarin	N			NA	N	38	33		NA	NA	NA	0.52381	0.575758	0.564103	5.12.17_01_02.10_av17_scrms_1st bout	Hair_12.9.16_01_3.22_av17_scrmxxxx	5.12.17_01_02.10_av17_scrms_1st bout.wav	0.297	6084	3401	0.126	0.424242	2953.5	7357.9	4404.4	4981.8	1437.09	86.7	3.92e-05	1.94237	29.81	1.58	2.79	5943.2	6976.8	8871.7
39	RAv17_01	1	N	1	2	37	2	0	1	1212	20	F	English	Y	cats, dogs	12	NA	Y	38	33		NA	40	NA	0.642857	0.333333	0.564103	5.12.17_01_02.10_av17_scrms_1st bout	Hair_12.9.16_01_3.22_av17_scrmxxxx	5.12.17_01_02.10_av17_scrms_1st bout.wav	0.297	6084	3401	0.126	0.424242	2953.5	7357.9	4404.4	4981.8	1437.09	86.7	3.92e-05	1.94237	29.81	1.58	2.79	5943.2	6976.8	8871.7
40	RAv17_01	507	Y	1	2	10	2	1	2	4838	27	F	English	Y	Rhesus macaque, tufted capuchins	60	48	Y	NA	NA		NA	NA	NA	0.547619	1	0.666667	5.12.17_01_02.10_av17_scrms_1st bout	Hair_12.9.16_01_3.22_av17_scrmxxxx	5.12.17_01_02.10_av17_scrms_1st bout.wav	0.297	6084	3401	0.126	0.424242	2953.5	7357.9	4404.4	4981.8	1437.09	86.7	3.92e-05	1.94237	29.81	1.58	2.79	5943.2	6976.8	8871.7
41	RAv17_01	88	N	1	2	26	2	1	2	308	19	M	Mandarin	N			NA	Y	49	27		NA	NA	NA	0.547619	0.818182	0.538462	5.12.17_01_02.10_av17_scrms_1st bout	Hair_12.9.16_01_3.22_av17_scrmxxxx	5.12.17_01_02.10_av17_scrms_1st bout.wav	0.297	6084	3401	0.126	0.424242	2953.5	7357.9	4404.4	4981.8	1437.09	86.7	3.92e-05	1.94237	29.81	1.58	2.79	5943.2	6976.8	8871.7
42	RAv17_01	33	N	1	3	2	2	1	2	374	19	F	Mandarin + English	N			NA	Y	56	33		NA	NA	NA	0.571429	0.272727	0.615385	5.12.17_01_02.10_av17_scrms_1st bout	Hair_12.9.16_01_3.22_av17_scrmxxxx	5.12.17_01_02.10_av17_scrms_1st bout.wav	0.297	6084	3401	0.126	0.424242	2953.5	7357.9	4404.4	4981.8	1437.09	86.7	3.92e-05	1.94237	29.81	1.58	2.79	5943.2	6976.8	8871.7
43	RAv17_01	42	N	1	1	30	2	1	2	712	19	F	English	N			NA	N	35	28		44	44	88	0.571429	0.454545	0.692308	5.12.17_01_02.10_av17_scrms_1st bout	Hair_12.9.16_01_3.22_av17_scrmxxxx	5.12.17_01_02.10_av17_scrms_1st bout.wav	0.297	6084	3401	0.126	0.424242	2953.5	7357.9	4404.4	4981.8	1437.09	86.7	3.92e-05	1.94237	29.81	1.58	2.79	5943.2	6976.8	8871.7
44	RAv17_01	90	N	1	4	19	2	1	2	676	21	M	English	N			NA	N	43	24		42	42	84	0.52381	0.69697	0.641026	5.12.17_01_02.10_av17_scrms_1st bout	Hair_12.9.16_01_3.22_av17_scrmxxxx	5.12.17_01_02.10_av17_scrms_1st bout.wav	0.297	6084	3401	0.126	0.424242	2953.5	7357.9	4404.4	4981.8	1437.09	86.7	3.92e-05	1.94237	29.81	1.58	2.79	5943.2	6976.8	8871.7
45	RAv17_01	26	N	1	4	36	2	1	2	220	24	M	Telugu	N			NA	N	41	35		NA	NA	NA	0.607143	0.515152	0.538462	5.12.17_01_02.10_av17_scrms_1st bout	Hair_12.9.16_01_3.22_av17_scrmxxxx	5.12.17_01_02.10_av17_scrms_1st bout.wav	0.297	6084	3401	0.126	0.424242	2953.5	7357.9	4404.4	4981.8	1437.09	86.7	3.92e-05	1.94237	29.81	1.58	2.79	5943.2	6976.8	8871.7
46	RAv17_01	112	N	1	3	16	2	1	2	251	18	M	Turkish	N			NA	Y	55	40		NA	NA	NA	0.535714	0.424242	0.461538	5.12.17_01_02.10_av17_scrms_1st bout	Hair_12.9.16_01_3.22_av17_scrmxxxx	5.12.17_01_02.10_av17_scrms_1st bout.wav	0.297	6084	3401	0.126	0.424242	2953.5	7357.9	4404.4	4981.8	1437.09	86.7	3.92e-05	1.94237	29.81	1.58	2.79	5943.2	6976.8	8871.7
47	RAv17_01	19	N	1	4	27	2	0	1	697	51	F	English	Y	mice	240	NA	Y	36	29		43	47	90	0.511905	0.575758	0.487179	5.12.17_01_02.10_av17_scrms_1st bout	Hair_12.9.16_01_3.22_av17_scrmxxxx	5.12.17_01_02.10_av17_scrms_1st bout.wav	0.297	6084	3401	0.126	0.424242	2953.5	7357.9	4404.4	4981.8	1437.09	86.7	3.92e-05	1.94237	29.81	1.58	2.79	5943.2	6976.8	8871.7
48	RAv17_01	511	Y	1	4	20	2	1	2	851	24	F	English	Y	Rhesus macaque, domestic cats	24	24	Y	NA	NA		NA	NA	NA	0.571429	0.69697	0.512821	5.12.17_01_02.10_av17_scrms_1st bout	Hair_12.9.16_01_3.22_av17_scrmxxxx	5.12.17_01_02.10_av17_scrms_1st bout.wav	0.297	6084	3401	0.126	0.424242	2953.5	7357.9	4404.4	4981.8	1437.09	86.7	3.92e-05	1.94237	29.81	1.58	2.79	5943.2	6976.8	8871.7
49	RAv17_01	9	N	1	2	14	2	0	1	2745	19	M	English	Y	dogs, cats	3	NA	Y	41	31		35	32	67	0.416667	0.121212	0.435897	5.12.17_01_02.10_av17_scrms_1st bout	Hair_12.9.16_01_3.22_av17_scrmxxxx	5.12.17_01_02.10_av17_scrms_1st bout.wav	0.297	6084	3401	0.126	0.424242	2953.5	7357.9	4404.4	4981.8	1437.09	86.7	3.92e-05	1.94237	29.81	1.58	2.79	5943.2	6976.8	8871.7
50	RAv17_01	106	N	1	3	24	2	1	2	379	18	F	Korean	N			NA	Y	53	39		NA	NA	NA	0.607143	0.606061	0.461538	5.12.17_01_02.10_av17_scrms_1st bout	Hair_12.9.16_01_3.22_av17_scrmxxxx	5.12.17_01_02.10_av17_scrms_1st bout.wav	0.297	6084	3401	0.126	0.424242	2953.5	7357.9	4404.4	4981.8	1437.09	86.7	3.92e-05	1.94237	29.81	1.58	2.79	5943.2	6976.8	8871.7
51	RAv17_01	89	N	1	2	1	2	1	2	591	18	F	Spanish	N			NA	Y	50	37		NA	NA	NA	0.619048	0.818182	0.589744	5.12.17_01_02.10_av17_scrms_1st bout	Hair_12.9.16_01_3.22_av17_scrmxxxx	5.12.17_01_02.10_av17_scrms_1st bout.wav	0.297	6084	3401	0.126	0.424242	2953.5	7357.9	4404.4	4981.8	1437.09	86.7	3.92e-05	1.94237	29.81	1.58	2.79	5943.2	6976.8	8871.7
52	RAv17_01	64	N	1	2	30	2	1	2	2809	18	F	English	N			NA	N	55	36		40	42	82	0.654762	0.393939	0.666667	5.12.17_01_02.10_av17_scrms_1st bout	Hair_12.9.16_01_3.22_av17_scrmxxxx	5.12.17_01_02.10_av17_scrms_1st bout.wav	0.297	6084	3401	0.126	0.424242	2953.5	7357.9	4404.4	4981.8	1437.09	86.7	3.92e-05	1.94237	29.81	1.58	2.79	5943.2	6976.8	8871.7
53	RAv17_01	70	N	1	1	26	2	1	2	315	18	F	English	N			NA	Y	62	34		48	45	93	0.52381	0.242424	0.384615	5.12.17_01_02.10_av17_scrms_1st bout	Hair_12.9.16_01_3.22_av17_scrmxxxx	5.12.17_01_02.10_av17_scrms_1st bout.wav	0.297	6084	3401	0.126	0.424242	2953.5	7357.9	4404.4	4981.8	1437.09	86.7	3.92e-05	1.94237	29.81	1.58	2.79	5943.2	6976.8	8871.7
54	RAv17_01	76	N	1	2	20	2	1	2	141	19	F	Chinese	N			NA	Y	41	41		NA	NA	NA	0.630952	0.393939	0.538462	5.12.17_01_02.10_av17_scrms_1st bout	Hair_12.9.16_01_3.22_av17_scrmxxxx	5.12.17_01_02.10_av17_scrms_1st bout.wav	0.297	6084	3401	0.126	0.424242	2953.5	7357.9	4404.4	4981.8	1437.09	86.7	3.92e-05	1.94237	29.81	1.58	2.79	5943.2	6976.8	8871.7
55	RAv17_01	28	N	1	3	11	2	1	2	585	40	F	English	N			NA	Y	50	33		42	NA	NA	0.630952	0.606061	0.564103	5.12.17_01_02.10_av17_scrms_1st bout	Hair_12.9.16_01_3.22_av17_scrmxxxx	5.12.17_01_02.10_av17_scrms_1st bout.wav	0.297	6084	3401	0.126	0.424242	2953.5	7357.9	4404.4	4981.8	1437.09	86.7	3.92e-05	1.94237	29.81	1.58	2.79	5943.2	6976.8	8871.7
56	RAv17_01	100	N	1	4	6	2	1	2	1717	21	F	Mandarin	N			NA	Y	50	36		NA	NA	NA	0.619048	0.424242	0.641026	5.12.17_01_02.10_av17_scrms_1st bout	Hair_12.9.16_01_3.22_av17_scrmxxxx	5.12.17_01_02.10_av17_scrms_1st bout.wav	0.297	6084	3401	0.126	0.424242	2953.5	7357.9	4404.4	4981.8	1437.09	86.7	3.92e-05	1.94237	29.81	1.58	2.79	5943.2	6976.8	8871.7
57	RAv17_01	59	N	1	2	28	2	1	2	274	18	M	Gujarati	N			NA	N	37	38		NA	NA	NA	0.52381	0.393939	0.666667	5.12.17_01_02.10_av17_scrms_1st bout	Hair_12.9.16_01_3.22_av17_scrmxxxx	5.12.17_01_02.10_av17_scrms_1st bout.wav	0.297	6084	3401	0.126	0.424242	2953.5	7357.9	4404.4	4981.8	1437.09	86.7	3.92e-05	1.94237	29.81	1.58	2.79	5943.2	6976.8	8871.7
58	RAv17_01	108	N	1	4	20	2	1	2	258	19	M	English	N			NA	N	59	24		45	43	88	0.571429	0.393939	0.435897	5.12.17_01_02.10_av17_scrms_1st bout	Hair_12.9.16_01_3.22_av17_scrmxxxx	5.12.17_01_02.10_av17_scrms_1st bout.wav	0.297	6084	3401	0.126	0.424242	2953.5	7357.9	4404.4	4981.8	1437.09	86.7	3.92e-05	1.94237	29.81	1.58	2.79	5943.2	6976.8	8871.7
59	RAv17_01	114	N	1	3	29	2	0	1	1062	19	M	English	N			NA	Y	58	35		36	38	74	0.607143	0.393939	0.512821	5.12.17_01_02.10_av17_scrms_1st bout	Hair_12.9.16_01_3.22_av17_scrmxxxx	5.12.17_01_02.10_av17_scrms_1st bout.wav	0.297	6084	3401	0.126	0.424242	2953.5	7357.9	4404.4	4981.8	1437.09	86.7	3.92e-05	1.94237	29.81	1.58	2.79	5943.2	6976.8	8871.7
60	RAv17_01	32	N	1	3	19	2	0	1	1276	23	F	English	N			NA	N	58	26		34	33	67	0.559524	0.424242	0.435897	5.12.17_01_02.10_av17_scrms_1st bout	Hair_12.9.16_01_3.22_av17_scrmxxxx	5.12.17_01_02.10_av17_scrms_1st bout.wav	0.297	6084	3401	0.126	0.424242	2953.5	7357.9	4404.4	4981.8	1437.09	86.7	3.92e-05	1.94237	29.81	1.58	2.79	5943.2	6976.8	8871.7
61	RAv17_01	55	N	1	1	25	2	1	2	456	18	F	Mandarin	N			NA	Y	64	30		NA	NA	NA	0.690476	0.515152	0.410256	5.12.17_01_02.10_av17_scrms_1st bout	Hair_12.9.16_01_3.22_av17_scrmxxxx	5.12.17_01_02.10_av17_scrms_1st bout.wav	0.297	6084	3401	0.126	0.424242	2953.5	7357.9	4404.4	4981.8	1437.09	86.7	3.92e-05	1.94237	29.81	1.58	2.79	5943.2	6976.8	8871.7
62	RAv17_01	21	N	1	2	18	2	1	2	712	20	F	English	Y	dogs	6	NA	Y	44	37		41	34	75	0.630952	0.787879	0.384615	5.12.17_01_02.10_av17_scrms_1st bout	Hair_12.9.16_01_3.22_av17_scrmxxxx	5.12.17_01_02.10_av17_scrms_1st bout.wav	0.297	6084	3401	0.126	0.424242	2953.5	7357.9	4404.4	4981.8	1437.09	86.7	3.92e-05	1.94237	29.81	1.58	2.79	5943.2	6976.8	8871.7
63	RAv17_01	505	Y	1	3	15	2	1	2	2080	30	F	English	Y	Rhesus macaque, horses, dogs, cats, birds, mangabey	120	94	Y	NA	NA		NA	NA	NA	0.595238	1	0.589744	5.12.17_01_02.10_av17_scrms_1st bout	Hair_12.9.16_01_3.22_av17_scrmxxxx	5.12.17_01_02.10_av17_scrms_1st bout.wav	0.297	6084	3401	0.126	0.424242	2953.5	7357.9	4404.4	4981.8	1437.09	86.7	3.92e-05	1.94237	29.81	1.58	2.79	5943.2	6976.8	8871.7
64	RAv17_01	17	N	1	4	28	2	1	2	745	19	F	Chinese	N			NA	Y	49	34		NA	NA	NA	0.595238	1	0.487179	5.12.17_01_02.10_av17_scrms_1st bout	Hair_12.9.16_01_3.22_av17_scrmxxxx	5.12.17_01_02.10_av17_scrms_1st bout.wav	0.297	6084	3401	0.126	0.424242	2953.5	7357.9	4404.4	4981.8	1437.09	86.7	3.92e-05	1.94237	29.81	1.58	2.79	5943.2	6976.8	8871.7
65	RAv17_01	98	N	1	1	12	2	0	1	723	18	F	English	N			NA	Y	36	39		37	48	85	0.690476	0.393939	0.538462	5.12.17_01_02.10_av17_scrms_1st bout	Hair_12.9.16_01_3.22_av17_scrmxxxx	5.12.17_01_02.10_av17_scrms_1st bout.wav	0.297	6084	3401	0.126	0.424242	2953.5	7357.9	4404.4	4981.8	1437.09	86.7	3.92e-05	1.94237	29.81	1.58	2.79	5943.2	6976.8	8871.7
66	RAv17_01	109	N	1	2	16	2	1	2	463	20	F	English	N			NA	Y	41	33		45	43	88	0.666667	0.727273	0.384615	5.12.17_01_02.10_av17_scrms_1st bout	Hair_12.9.16_01_3.22_av17_scrmxxxx	5.12.17_01_02.10_av17_scrms_1st bout.wav	0.297	6084	3401	0.126	0.424242	2953.5	7357.9	4404.4	4981.8	1437.09	86.7	3.92e-05	1.94237	29.81	1.58	2.79	5943.2	6976.8	8871.7
67	RAv17_01	78	N	1	1	38	2	1	2	452	20	M	Spanish	Y	dogs, snakes	2	NA	Y	45	35		NA	NA	NA	0.547619	0.424242	0.487179	5.12.17_01_02.10_av17_scrms_1st bout	Hair_12.9.16_01_3.22_av17_scrmxxxx	5.12.17_01_02.10_av17_scrms_1st bout.wav	0.297	6084	3401	0.126	0.424242	2953.5	7357.9	4404.4	4981.8	1437.09	86.7	3.92e-05	1.94237	29.81	1.58	2.79	5943.2	6976.8	8871.7
68	RAv17_01	85	N	1	2	8	2	1	2	1963	19	F	Chinese	N			NA	Y	25	32		NA	NA	NA	0.571429	0.363636	0.435897	5.12.17_01_02.10_av17_scrms_1st bout	Hair_12.9.16_01_3.22_av17_scrmxxxx	5.12.17_01_02.10_av17_scrms_1st bout.wav	0.297	6084	3401	0.126	0.424242	2953.5	7357.9	4404.4	4981.8	1437.09	86.7	3.92e-05	1.94237	29.81	1.58	2.79	5943.2	6976.8	8871.7
69	RAv17_01	75	N	1	4	23	2	0	1	955	19	M	Chinese	Y	fruitfly, termites	1.5	NA	N	58	38		NA	NA	NA	0.547619	0.484848	0.461538	5.12.17_01_02.10_av17_scrms_1st bout	Hair_12.9.16_01_3.22_av17_scrmxxxx	5.12.17_01_02.10_av17_scrms_1st bout.wav	0.297	6084	3401	0.126	0.424242	2953.5	7357.9	4404.4	4981.8	1437.09	86.7	3.92e-05	1.94237	29.81	1.58	2.79	5943.2	6976.8	8871.7
70	RAv17_01	20	Y	1	3	23	2	0	1	556	37	F	English	Y	Rhesus, chimpanzees, dogs, cats, mice, rats	180	132	Y	52	33		46	47	93	0.392857	0.454545	0.589744	5.12.17_01_02.10_av17_scrms_1st bout	Hair_12.9.16_01_3.22_av17_scrmxxxx	5.12.17_01_02.10_av17_scrms_1st bout.wav	0.297	6084	3401	0.126	0.424242	2953.5	7357.9	4404.4	4981.8	1437.09	86.7	3.92e-05	1.94237	29.81	1.58	2.79	5943.2	6976.8	8871.7
71	RAv17_01	73	N	1	2	22	2	0	1	880	19	F	English and Chinese	N			NA	Y	41	37		34	36	70	0.571429	0.575758	0.538462	5.12.17_01_02.10_av17_scrms_1st bout	Hair_12.9.16_01_3.22_av17_scrmxxxx	5.12.17_01_02.10_av17_scrms_1st bout.wav	0.297	6084	3401	0.126	0.424242	2953.5	7357.9	4404.4	4981.8	1437.09	86.7	3.92e-05	1.94237	29.81	1.58	2.79	5943.2	6976.8	8871.7
72	RAv17_01	84	N	1	1	39	2	1	2	348	19	F	English	N			NA	Y	34	36		35	37	72	0.547619	0.575758	0.512821	5.12.17_01_02.10_av17_scrms_1st bout	Hair_12.9.16_01_3.22_av17_scrmxxxx	5.12.17_01_02.10_av17_scrms_1st bout.wav	0.297	6084	3401	0.126	0.424242	2953.5	7357.9	4404.4	4981.8	1437.09	86.7	3.92e-05	1.94237	29.81	1.58	2.79	5943.2	6976.8	8871.7
73	RAv17_01	50	N	1	3	30	2	1	2	123	19	F	English	Y	dogs, cats	12	NA	Y	53	40		24	19	43	0.5	0.212121	0.512821	5.12.17_01_02.10_av17_scrms_1st bout	Hair_12.9.16_01_3.22_av17_scrmxxxx	5.12.17_01_02.10_av17_scrms_1st bout.wav	0.297	6084	3401	0.126	0.424242	2953.5	7357.9	4404.4	4981.8	1437.09	86.7	3.92e-05	1.94237	29.81	1.58	2.79	5943.2	6976.8	8871.7
74	RAv17_01	31	N	1	2	17	2	1	2	1136	18	F	English	N			NA	Y	47	35		38	40	78	0.583333	0.575758	0.384615	5.12.17_01_02.10_av17_scrms_1st bout	Hair_12.9.16_01_3.22_av17_scrmxxxx	5.12.17_01_02.10_av17_scrms_1st bout.wav	0.297	6084	3401	0.126	0.424242	2953.5	7357.9	4404.4	4981.8	1437.09	86.7	3.92e-05	1.94237	29.81	1.58	2.79	5943.2	6976.8	8871.7
75	RAv17_01	66	N	1	1	14	2	0	1	1655	20	M	Chinese	N			NA	N	41	38		NA	NA	NA	0.47619	0.69697	0.512821	5.12.17_01_02.10_av17_scrms_1st bout	Hair_12.9.16_01_3.22_av17_scrmxxxx	5.12.17_01_02.10_av17_scrms_1st bout.wav	0.297	6084	3401	0.126	0.424242	2953.5	7357.9	4404.4	4981.8	1437.09	86.7	3.92e-05	1.94237	29.81	1.58	2.79	5943.2	6976.8	8871.7
76	RAv17_01	95	N	1	1	4	2	1	2	262	20	F	English	N			NA	Y	57	30		39	44	83	0.571429	0.363636	0.564103	5.12.17_01_02.10_av17_scrms_1st bout	Hair_12.9.16_01_3.22_av17_scrmxxxx	5.12.17_01_02.10_av17_scrms_1st bout.wav	0.297	6084	3401	0.126	0.424242	2953.5	7357.9	4404.4	4981.8	1437.09	86.7	3.92e-05	1.94237	29.81	1.58	2.79	5943.2	6976.8	8871.7
77	RAv17_01	11	N	1	2	18	2	1	2	1403	20	F	English (mainly) + Hindi	Y	dogs	6	NA	Y	66	45	noted w/ regard to coos that it is upsetting - sounds like they're in pain. Noted surpirse that screams would be more intense context than coos	34	41	75	0.666667	0.545455	0.641026	5.12.17_01_02.10_av17_scrms_1st bout	Hair_12.9.16_01_3.22_av17_scrmxxxx	5.12.17_01_02.10_av17_scrms_1st bout.wav	0.297	6084	3401	0.126	0.424242	2953.5	7357.9	4404.4	4981.8	1437.09	86.7	3.92e-05	1.94237	29.81	1.58	2.79	5943.2	6976.8	8871.7
78	RAv17_01	92	N	1	3	15	2	1	2	879	18	F	English	N			NA	Y	45	30		36	36	72	0.595238	0.212121	0.589744	5.12.17_01_02.10_av17_scrms_1st bout	Hair_12.9.16_01_3.22_av17_scrmxxxx	5.12.17_01_02.10_av17_scrms_1st bout.wav	0.297	6084	3401	0.126	0.424242	2953.5	7357.9	4404.4	4981.8	1437.09	86.7	3.92e-05	1.94237	29.81	1.58	2.79	5943.2	6976.8	8871.7
79	RAv17_01	43	N	1	1	29	2	1	2	440	19	M	English	N			NA	Y	37	39		36	40	76	0.595238	0.666667	0.589744	5.12.17_01_02.10_av17_scrms_1st bout	Hair_12.9.16_01_3.22_av17_scrmxxxx	5.12.17_01_02.10_av17_scrms_1st bout.wav	0.297	6084	3401	0.126	0.424242	2953.5	7357.9	4404.4	4981.8	1437.09	86.7	3.92e-05	1.94237	29.81	1.58	2.79	5943.2	6976.8	8871.7
80	RAv17_01	79	N	1	2	12	2	1	2	244	21	M	English	N			NA	Y	55	38		33	34	67	0.571429	0.393939	0.564103	5.12.17_01_02.10_av17_scrms_1st bout	Hair_12.9.16_01_3.22_av17_scrmxxxx	5.12.17_01_02.10_av17_scrms_1st bout.wav	0.297	6084	3401	0.126	0.424242	2953.5	7357.9	4404.4	4981.8	1437.09	86.7	3.92e-05	1.94237	29.81	1.58	2.79	5943.2	6976.8	8871.7
81	RAv17_01	97	N	1	3	38	2	1	2	823	19	F	English	N			NA	Y	48	28		40	43	83	0.595238	0.606061	0.487179	5.12.17_01_02.10_av17_scrms_1st bout	Hair_12.9.16_01_3.22_av17_scrmxxxx	5.12.17_01_02.10_av17_scrms_1st bout.wav	0.297	6084	3401	0.126	0.424242	2953.5	7357.9	4404.4	4981.8	1437.09	86.7	3.92e-05	1.94237	29.81	1.58	2.79	5943.2	6976.8	8871.7
82	RAv17_01	67	N	1	4	24	2	1	2	552	18	F	English	N			NA	N	29	44		32	32	64	0.75	0.636364	0.564103	5.12.17_01_02.10_av17_scrms_1st bout	Hair_12.9.16_01_3.22_av17_scrmxxxx	5.12.17_01_02.10_av17_scrms_1st bout.wav	0.297	6084	3401	0.126	0.424242	2953.5	7357.9	4404.4	4981.8	1437.09	86.7	3.92e-05	1.94237	29.81	1.58	2.79	5943.2	6976.8	8871.7
83	RAv17_01	103	N	1	1	8	2	1	2	398	19	F	Korean + English	Y	dogs, cats	3	NA	Y	47	39		40	41	81	0.52381	0.393939	0.512821	5.12.17_01_02.10_av17_scrms_1st bout	Hair_12.9.16_01_3.22_av17_scrmxxxx	5.12.17_01_02.10_av17_scrms_1st bout.wav	0.297	6084	3401	0.126	0.424242	2953.5	7357.9	4404.4	4981.8	1437.09	86.7	3.92e-05	1.94237	29.81	1.58	2.79	5943.2	6976.8	8871.7
84	RAv17_01	40	N	1	1	11	2	1	2	306	19	F	Chinese	N			NA	N	39	39		NA	NA	NA	0.666667	0.515152	0.512821	5.12.17_01_02.10_av17_scrms_1st bout	Hair_12.9.16_01_3.22_av17_scrmxxxx	5.12.17_01_02.10_av17_scrms_1st bout.wav	0.297	6084	3401	0.126	0.424242	2953.5	7357.9	4404.4	4981.8	1437.09	86.7	3.92e-05	1.94237	29.81	1.58	2.79	5943.2	6976.8	8871.7
85	RAv17_01	15	N	1	2	33	2	1	2	1852	20	F	English and Chinese	N			NA	Y	58	36	didn't make it to face - just voice	NA	36	NA	0.488095	0.393939	0.461538	5.12.17_01_02.10_av17_scrms_1st bout	Hair_12.9.16_01_3.22_av17_scrmxxxx	5.12.17_01_02.10_av17_scrms_1st bout.wav	0.297	6084	3401	0.126	0.424242	2953.5	7357.9	4404.4	4981.8	1437.09	86.7	3.92e-05	1.94237	29.81	1.58	2.79	5943.2	6976.8	8871.7
86	RAv17_01	35	N	1	4	24	2	0	1	969	19	M	English	N			NA	N	40	21		44	39	83	0.666667	0.818182	0.641026	5.12.17_01_02.10_av17_scrms_1st bout	Hair_12.9.16_01_3.22_av17_scrmxxxx	5.12.17_01_02.10_av17_scrms_1st bout.wav	0.297	6084	3401	0.126	0.424242	2953.5	7357.9	4404.4	4981.8	1437.09	86.7	3.92e-05	1.94237	29.81	1.58	2.79	5943.2	6976.8	8871.7
87	RAv17_01	4	N	1	2	1	2	1	2	236	20	M	English	N			NA	N	43	38		27	24	51	0.559524	0.424242	0.589744	5.12.17_01_02.10_av17_scrms_1st bout	Hair_12.9.16_01_3.22_av17_scrmxxxx	5.12.17_01_02.10_av17_scrms_1st bout.wav	0.297	6084	3401	0.126	0.424242	2953.5	7357.9	4404.4	4981.8	1437.09	86.7	3.92e-05	1.94237	29.81	1.58	2.79	5943.2	6976.8	8871.7
88	RAv17_01	56	N	1	1	13	2	0	1	676	18	F	Chinese	N			NA	Y	31	30		NA	NA	NA	0.595238	0.575758	0.384615	5.12.17_01_02.10_av17_scrms_1st bout	Hair_12.9.16_01_3.22_av17_scrmxxxx	5.12.17_01_02.10_av17_scrms_1st bout.wav	0.297	6084	3401	0.126	0.424242	2953.5	7357.9	4404.4	4981.8	1437.09	86.7	3.92e-05	1.94237	29.81	1.58	2.79	5943.2	6976.8	8871.7
89	RAv17_01	110	N	1	4	2	2	0	1	1383	19	M	English	N			NA	Y	40	32		35	38	73	0.511905	0.69697	0.564103	5.12.17_01_02.10_av17_scrms_1st bout	Hair_12.9.16_01_3.22_av17_scrmxxxx	5.12.17_01_02.10_av17_scrms_1st bout.wav	0.297	6084	3401	0.126	0.424242	2953.5	7357.9	4404.4	4981.8	1437.09	86.7	3.92e-05	1.94237	29.81	1.58	2.79	5943.2	6976.8	8871.7
90	RAv17_01	74	N	1	3	3	2	1	2	359	19	F	English	Y	cats, dogs	1	NA	Y	47	41		41	43	84	0.428571	0.272727	0.538462	5.12.17_01_02.10_av17_scrms_1st bout	Hair_12.9.16_01_3.22_av17_scrmxxxx	5.12.17_01_02.10_av17_scrms_1st bout.wav	0.297	6084	3401	0.126	0.424242	2953.5	7357.9	4404.4	4981.8	1437.09	86.7	3.92e-05	1.94237	29.81	1.58	2.79	5943.2	6976.8	8871.7
91	RAv17_01	512	Y	1	1	22	2	1	2	625	39	M	English	Y	Rhesus macaque, pigtail macaque, common chimpanzee, west lowland gorilla, Sooty mangabey	144	144	Y	NA	NA	occasionally needed to answer radio during task	NA	NA	NA	0.642857	1	0.589744	5.12.17_01_02.10_av17_scrms_1st bout	Hair_12.9.16_01_3.22_av17_scrmxxxx	5.12.17_01_02.10_av17_scrms_1st bout.wav	0.297	6084	3401	0.126	0.424242	2953.5	7357.9	4404.4	4981.8	1437.09	86.7	3.92e-05	1.94237	29.81	1.58	2.79	5943.2	6976.8	8871.7
92	RAv17_01	68	N	1	4	32	2	0	1	751	19	M	Spanish	N			NA	N	48	NA	didn't fill out this questionnaire animal	NA	NA	NA	0.607143	0.333333	0.641026	5.12.17_01_02.10_av17_scrms_1st bout	Hair_12.9.16_01_3.22_av17_scrmxxxx	5.12.17_01_02.10_av17_scrms_1st bout.wav	0.297	6084	3401	0.126	0.424242	2953.5	7357.9	4404.4	4981.8	1437.09	86.7	3.92e-05	1.94237	29.81	1.58	2.79	5943.2	6976.8	8871.7
93	RAv17_01	502	Y	1	4	30	2	0	1	2196	39	F	English	Y	Rhesus, pigrails, gorillas, orangutans, lemurs	216	204	Y	63	30		45	43	88	0.642857	0.909091	0.666667	5.12.17_01_02.10_av17_scrms_1st bout	Hair_12.9.16_01_3.22_av17_scrmxxxx	5.12.17_01_02.10_av17_scrms_1st bout.wav	0.297	6084	3401	0.126	0.424242	2953.5	7357.9	4404.4	4981.8	1437.09	86.7	3.92e-05	1.94237	29.81	1.58	2.79	5943.2	6976.8	8871.7
94	RAv17_01	60	N	1	1	10	2	1	2	598	18	F	Chinese	N			NA	Y	54	33		NA	NA	NA	0.595238	0.69697	0.615385	5.12.17_01_02.10_av17_scrms_1st bout	Hair_12.9.16_01_3.22_av17_scrmxxxx	5.12.17_01_02.10_av17_scrms_1st bout.wav	0.297	6084	3401	0.126	0.424242	2953.5	7357.9	4404.4	4981.8	1437.09	86.7	3.92e-05	1.94237	29.81	1.58	2.79	5943.2	6976.8	8871.7
95	RAv17_01	57	N	1	2	19	2	0	1	351	20	F	English	N			NA	N	29	31		27	41	68	0.547619	0.333333	0.538462	5.12.17_01_02.10_av17_scrms_1st bout	Hair_12.9.16_01_3.22_av17_scrmxxxx	5.12.17_01_02.10_av17_scrms_1st bout.wav	0.297	6084	3401	0.126	0.424242	2953.5	7357.9	4404.4	4981.8	1437.09	86.7	3.92e-05	1.94237	29.81	1.58	2.79	5943.2	6976.8	8871.7
96	RAv17_01	49	N	1	3	39	2	1	2	534	18	F	English	N			NA	N	44	28		42	2	44	0.642857	0.454545	0.487179	5.12.17_01_02.10_av17_scrms_1st bout	Hair_12.9.16_01_3.22_av17_scrmxxxx	5.12.17_01_02.10_av17_scrms_1st bout.wav	0.297	6084	3401	0.126	0.424242	2953.5	7357.9	4404.4	4981.8	1437.09	86.7	3.92e-05	1.94237	29.81	1.58	2.79	5943.2	6976.8	8871.7
97	RAv17_01	53	N	1	4	23	2	1	2	991	18	F	English	N			NA	N	71	47		22	17	39	0.642857	0.787879	0.641026	5.12.17_01_02.10_av17_scrms_1st bout	Hair_12.9.16_01_3.22_av17_scrmxxxx	5.12.17_01_02.10_av17_scrms_1st bout.wav	0.297	6084	3401	0.126	0.424242	2953.5	7357.9	4404.4	4981.8	1437.09	86.7	3.92e-05	1.94237	29.81	1.58	2.79	5943.2	6976.8	8871.7
98	RAv17_01	80	N	1	1	19	2	0	1	934	18	F	English	N			NA	Y	57	34		36	3	39	0.607143	0.545455	0.358974	5.12.17_01_02.10_av17_scrms_1st bout	Hair_12.9.16_01_3.22_av17_scrmxxxx	5.12.17_01_02.10_av17_scrms_1st bout.wav	0.297	6084	3401	0.126	0.424242	2953.5	7357.9	4404.4	4981.8	1437.09	86.7	3.92e-05	1.94237	29.81	1.58	2.79	5943.2	6976.8	8871.7
99	RAv17_01	501	Y	1	1	31	2	1	2	280	26	M	English	Y	lemurs (black white ruffed, ringtail, red bellied, crown, mongoose), Rhesus monkeys, gorillas, orangutans	Lemur: 24, Rh: 48, Gorilla: 12, Orangutan: 12	48	Y	47	37		46	44	90	0.559524	0.69697	0.461538	5.12.17_01_02.10_av17_scrms_1st bout	Hair_12.9.16_01_3.22_av17_scrmxxxx	5.12.17_01_02.10_av17_scrms_1st bout.wav	0.297	6084	3401	0.126	0.424242	2953.5	7357.9	4404.4	4981.8	1437.09	86.7	3.92e-05	1.94237	29.81	1.58	2.79	5943.2	6976.8	8871.7
100	RAv17_01	509	Y	1	2	26	2	1	2	846	28	M	Spanish/English	Y	Rhesus macaque, mangabey	48	48	Y	NA	NA		NA	NA	NA	0.464286	0.969697	0.615385	5.12.17_01_02.10_av17_scrms_1st bout	Hair_12.9.16_01_3.22_av17_scrmxxxx	5.12.17_01_02.10_av17_scrms_1st bout.wav	0.297	6084	3401	0.126	0.424242	2953.5	7357.9	4404.4	4981.8	1437.09	86.7	3.92e-05	1.94237	29.81	1.58	2.79	5943.2	6976.8	8871.7
101	RAv17_01	86	N	1	3	19	2	1	2	659	22	M	Chinese	N			NA	Y	44	35		NA	NA	NA	0.666667	0.515152	0.641026	5.12.17_01_02.10_av17_scrms_1st bout	Hair_12.9.16_01_3.22_av17_scrmxxxx	5.12.17_01_02.10_av17_scrms_1st bout.wav	0.297	6084	3401	0.126	0.424242	2953.5	7357.9	4404.4	4981.8	1437.09	86.7	3.92e-05	1.94237	29.81	1.58	2.79	5943.2	6976.8	8871.7
102	RAv17_01	113	N	1	1	30	2	1	2	531	18	F	English	N			NA	Y	52	38		47	41	88	0.583333	0.848485	0.564103	5.12.17_01_02.10_av17_scrms_1st bout	Hair_12.9.16_01_3.22_av17_scrmxxxx	5.12.17_01_02.10_av17_scrms_1st bout.wav	0.297	6084	3401	0.126	0.424242	2953.5	7357.9	4404.4	4981.8	1437.09	86.7	3.92e-05	1.94237	29.81	1.58	2.79	5943.2	6976.8	8871.7
103	RAv17_01	18	N	1	1	13	2	0	1	1549	20	F	English	N			NA	Y	44	35		32	42	74	0.571429	0.151515	0.333333	5.12.17_01_02.10_av17_scrms_1st bout	Hair_12.9.16_01_3.22_av17_scrmxxxx	5.12.17_01_02.10_av17_scrms_1st bout.wav	0.297	6084	3401	0.126	0.424242	2953.5	7357.9	4404.4	4981.8	1437.09	86.7	3.92e-05	1.94237	29.81	1.58	2.79	5943.2	6976.8	8871.7
104	RAv17_01	63	N	1	3	25	2	1	2	1357	19	F	English	N			NA	N	60	40		44	42	86	0.535714	0	0.717949	5.12.17_01_02.10_av17_scrms_1st bout	Hair_12.9.16_01_3.22_av17_scrmxxxx	5.12.17_01_02.10_av17_scrms_1st bout.wav	0.297	6084	3401	0.126	0.424242	2953.5	7357.9	4404.4	4981.8	1437.09	86.7	3.92e-05	1.94237	29.81	1.58	2.79	5943.2	6976.8	8871.7
105	RAv17_01	51	N	1	3	9	2	1	2	2608	18	F	English	N			NA	Y	31	36		45	44	89	0.654762	0.515152	0.615385	5.12.17_01_02.10_av17_scrms_1st bout	Hair_12.9.16_01_3.22_av17_scrmxxxx	5.12.17_01_02.10_av17_scrms_1st bout.wav	0.297	6084	3401	0.126	0.424242	2953.5	7357.9	4404.4	4981.8	1437.09	86.7	3.92e-05	1.94237	29.81	1.58	2.79	5943.2	6976.8	8871.7
106	RAv17_01	29	N	1	3	16	2	0	1	1932	19	F	English	Y	dogs, cats	3	NA	Y	63	44		47	41	88	0.547619	0.454545	0.512821	5.12.17_01_02.10_av17_scrms_1st bout	Hair_12.9.16_01_3.22_av17_scrmxxxx	5.12.17_01_02.10_av17_scrms_1st bout.wav	0.297	6084	3401	0.126	0.424242	2953.5	7357.9	4404.4	4981.8	1437.09	86.7	3.92e-05	1.94237	29.81	1.58	2.79	5943.2	6976.8	8871.7
107	RAv17_01	30	N	1	3	21	2	1	2	549	19	F	Chinese	N			NA	N	43	31		NA	NA	NA	0.535714	0.151515	0.641026	5.12.17_01_02.10_av17_scrms_1st bout	Hair_12.9.16_01_3.22_av17_scrmxxxx	5.12.17_01_02.10_av17_scrms_1st bout.wav	0.297	6084	3401	0.126	0.424242	2953.5	7357.9	4404.4	4981.8	1437.09	86.7	3.92e-05	1.94237	29.81	1.58	2.79	5943.2	6976.8	8871.7
108	RAv17_01	47	N	1	1	32	2	1	2	123	18	F	English	N			NA	Y	60	42		42	45	87	0.47619	0.30303	0.333333	5.12.17_01_02.10_av17_scrms_1st bout	Hair_12.9.16_01_3.22_av17_scrmxxxx	5.12.17_01_02.10_av17_scrms_1st bout.wav	0.297	6084	3401	0.126	0.424242	2953.5	7357.9	4404.4	4981.8	1437.09	86.7	3.92e-05	1.94237	29.81	1.58	2.79	5943.2	6976.8	8871.7
109	RAv17_01	44	N	1	4	7	2	1	2	544	31	F	English	N			NA	Y	39	34		47	45	92	0.571429	0.606061	0.333333	5.12.17_01_02.10_av17_scrms_1st bout	Hair_12.9.16_01_3.22_av17_scrmxxxx	5.12.17_01_02.10_av17_scrms_1st bout.wav	0.297	6084	3401	0.126	0.424242	2953.5	7357.9	4404.4	4981.8	1437.09	86.7	3.92e-05	1.94237	29.81	1.58	2.79	5943.2	6976.8	8871.7
110	RAv17_01	13	N	1	3	31	2	0	1	1239	19	F	English	N			NA	N	21	34		42	41	83	0.5	0.666667	0.487179	5.12.17_01_02.10_av17_scrms_1st bout	Hair_12.9.16_01_3.22_av17_scrmxxxx	5.12.17_01_02.10_av17_scrms_1st bout.wav	0.297	6084	3401	0.126	0.424242	2953.5	7357.9	4404.4	4981.8	1437.09	86.7	3.92e-05	1.94237	29.81	1.58	2.79	5943.2	6976.8	8871.7
111	RAv17_01	12	N	1	1	11	2	0	1	634	21	M	Chinese	N			NA	Y	41	34		NA	NA	NA	0.642857	0.484848	0.410256	5.12.17_01_02.10_av17_scrms_1st bout	Hair_12.9.16_01_3.22_av17_scrmxxxx	5.12.17_01_02.10_av17_scrms_1st bout.wav	0.297	6084	3401	0.126	0.424242	2953.5	7357.9	4404.4	4981.8	1437.09	86.7	3.92e-05	1.94237	29.81	1.58	2.79	5943.2	6976.8	8871.7
112	RAv17_01	38	N	1	3	11	2	1	2	766	18	F	English	N			NA	Y	57	36		41	41	82	0.619048	0.606061	0.615385	5.12.17_01_02.10_av17_scrms_1st bout	Hair_12.9.16_01_3.22_av17_scrmxxxx	5.12.17_01_02.10_av17_scrms_1st bout.wav	0.297	6084	3401	0.126	0.424242	2953.5	7357.9	4404.4	4981.8	1437.09	86.7	3.92e-05	1.94237	29.81	1.58	2.79	5943.2	6976.8	8871.7
113	RAv17_01	36	N	1	2	26	2	0	1	541	19	F	English	Y	dogs, cats	4	NA	Y	53	31		42	42	84	0.416667	0.606061	0.435897	5.12.17_01_02.10_av17_scrms_1st bout	Hair_12.9.16_01_3.22_av17_scrmxxxx	5.12.17_01_02.10_av17_scrms_1st bout.wav	0.297	6084	3401	0.126	0.424242	2953.5	7357.9	4404.4	4981.8	1437.09	86.7	3.92e-05	1.94237	29.81	1.58	2.79	5943.2	6976.8	8871.7
114	RAv17_01	27	N	1	1	13	2	0	1	809	23	F	Telugu	N			NA	N	32	44		NA	NA	NA	0.547619	0.151515	0.512821	5.12.17_01_02.10_av17_scrms_1st bout	Hair_12.9.16_01_3.22_av17_scrmxxxx	5.12.17_01_02.10_av17_scrms_1st bout.wav	0.297	6084	3401	0.126	0.424242	2953.5	7357.9	4404.4	4981.8	1437.09	86.7	3.92e-05	1.94237	29.81	1.58	2.79	5943.2	6976.8	8871.7
115	RAv17_01	65	N	1	4	28	2	1	2	414	20	F	Arabic	Y			NA	N	36	35		NA	NA	NA	0.559524	0.363636	0.564103	5.12.17_01_02.10_av17_scrms_1st bout	Hair_12.9.16_01_3.22_av17_scrmxxxx	5.12.17_01_02.10_av17_scrms_1st bout.wav	0.297	6084	3401	0.126	0.424242	2953.5	7357.9	4404.4	4981.8	1437.09	86.7	3.92e-05	1.94237	29.81	1.58	2.79	5943.2	6976.8	8871.7
116	RAv17_01	7	N	1	4	21	2	0	1	384	21	F	English	N			NA	Y	49	33		44	43	87	0.583333	0.363636	0.615385	5.12.17_01_02.10_av17_scrms_1st bout	Hair_12.9.16_01_3.22_av17_scrmxxxx	5.12.17_01_02.10_av17_scrms_1st bout.wav	0.297	6084	3401	0.126	0.424242	2953.5	7357.9	4404.4	4981.8	1437.09	86.7	3.92e-05	1.94237	29.81	1.58	2.79	5943.2	6976.8	8871.7
117	RAv17_01	6	N	1	2	26	2	1	2	392	23	M	English	Y	mice	3	NA	Y	31	28		38	41	79	0.595238	0.484848	0.589744	5.12.17_01_02.10_av17_scrms_1st bout	Hair_12.9.16_01_3.22_av17_scrmxxxx	5.12.17_01_02.10_av17_scrms_1st bout.wav	0.297	6084	3401	0.126	0.424242	2953.5	7357.9	4404.4	4981.8	1437.09	86.7	3.92e-05	1.94237	29.81	1.58	2.79	5943.2	6976.8	8871.7
118	RAv17_01	52	N	1	3	8	2	1	2	408	19	F	English	N			NA	Y	55	38		42	43	85	0.619048	0.393939	0.512821	5.12.17_01_02.10_av17_scrms_1st bout	Hair_12.9.16_01_3.22_av17_scrmxxxx	5.12.17_01_02.10_av17_scrms_1st bout.wav	0.297	6084	3401	0.126	0.424242	2953.5	7357.9	4404.4	4981.8	1437.09	86.7	3.92e-05	1.94237	29.81	1.58	2.79	5943.2	6976.8	8871.7
119	RAv17_01	513	Y	1	3	35	2	0	1	1932	53	F	English	Y	chimps, bonobos, Rhesus macaque, Sooty mangabeys, pigtail macaque, gibbons, orangutan, stumptail macaques, baboons	288	288	Y	NA	NA		NA	NA	NA	0.535714	0.969697	0.589744	5.12.17_01_02.10_av17_scrms_1st bout	Hair_12.9.16_01_3.22_av17_scrmxxxx	5.12.17_01_02.10_av17_scrms_1st bout.wav	0.297	6084	3401	0.126	0.424242	2953.5	7357.9	4404.4	4981.8	1437.09	86.7	3.92e-05	1.94237	29.81	1.58	2.79	5943.2	6976.8	8871.7
120	RAv17_01	22	N	1	4	8	2	1	2	1058	31	F	English	Y	dogs, cats	6	NA	Y	56	49		47	46	93	0.452381	0.515152	0.692308	5.12.17_01_02.10_av17_scrms_1st bout	Hair_12.9.16_01_3.22_av17_scrmxxxx	5.12.17_01_02.10_av17_scrms_1st bout.wav	0.297	6084	3401	0.126	0.424242	2953.5	7357.9	4404.4	4981.8	1437.09	86.7	3.92e-05	1.94237	29.81	1.58	2.79	5943.2	6976.8	8871.7
121	RAv17_01	107	N	1	2	30	2	1	2	3566	22	F	Chinese	N			NA	N	21	37		NA	NA	NA	0.595238	0.424242	0.435897	5.12.17_01_02.10_av17_scrms_1st bout	Hair_12.9.16_01_3.22_av17_scrmxxxx	5.12.17_01_02.10_av17_scrms_1st bout.wav	0.297	6084	3401	0.126	0.424242	2953.5	7357.9	4404.4	4981.8	1437.09	86.7	3.92e-05	1.94237	29.81	1.58	2.79	5943.2	6976.8	8871.7
122	RAv17_01	77	N	1	4	13	2	1	2	517	19	M	Chinese	N			NA	Y	46	18		NA	NA	NA	0.595238	0.454545	0.538462	5.12.17_01_02.10_av17_scrms_1st bout	Hair_12.9.16_01_3.22_av17_scrmxxxx	5.12.17_01_02.10_av17_scrms_1st bout.wav	0.297	6084	3401	0.126	0.424242	2953.5	7357.9	4404.4	4981.8	1437.09	86.7	3.92e-05	1.94237	29.81	1.58	2.79	5943.2	6976.8	8871.7
123	RAv17_01	510	Y	1	4	33	2	1	2	7182	30	M	English	Y	Rhesus macaque, Sooty mangabey	60	60	Y	NA	NA	asked for more clarification on "intense emotion" ~3 min into task	NA	NA	NA	0.511905	0.727273	0.717949	5.12.17_01_02.10_av17_scrms_1st bout	Hair_12.9.16_01_3.22_av17_scrmxxxx	5.12.17_01_02.10_av17_scrms_1st bout.wav	0.297	6084	3401	0.126	0.424242	2953.5	7357.9	4404.4	4981.8	1437.09	86.7	3.92e-05	1.94237	29.81	1.58	2.79	5943.2	6976.8	8871.7
124	RAv17_01	104	N	1	2	35	2	1	2	409	19	F	Bangla	N			NA	N	49	31		NA	NA	NA	0.619048	0.363636	0.384615	5.12.17_01_02.10_av17_scrms_1st bout	Hair_12.9.16_01_3.22_av17_scrmxxxx	5.12.17_01_02.10_av17_scrms_1st bout.wav	0.297	6084	3401	0.126	0.424242	2953.5	7357.9	4404.4	4981.8	1437.09	86.7	3.92e-05	1.94237	29.81	1.58	2.79	5943.2	6976.8	8871.7
125	RAv17_01	25	N	1	4	14	2	0	1	1524	21	M	English	N			NA	N	56	32		34	41	75	0.5	0.575758	0.461538	5.12.17_01_02.10_av17_scrms_1st bout	Hair_12.9.16_01_3.22_av17_scrmxxxx	5.12.17_01_02.10_av17_scrms_1st bout.wav	0.297	6084	3401	0.126	0.424242	2953.5	7357.9	4404.4	4981.8	1437.09	86.7	3.92e-05	1.94237	29.81	1.58	2.79	5943.2	6976.8	8871.7
126	RAv17_02	62	N	1	1	6	1	0	2	136	18	F	English	Y	mice	1	NA	Y	59	32		46	40	86	0.559524	0.484848	0.538462	5.12.17_01_02.10_av17_scrms_2nd bout	Hair_12.9.16_01_3.22_av17_scrmxxxx	Hair_12.9.16_01_3.22_av17_scrmxxxx.wav	0.579	4135	3739	0.289	0.499136	1657.5	4834	3176.5	3787.6	1181.03	93.1	7.94e-05	1.84895	25.67	-0.97	1.73	4694.2	7278.2	9517.7
127	RAv17_02	79	N	1	2	10	1	0	2	281	21	M	English	N			NA	Y	55	38		33	34	67	0.571429	0.393939	0.564103	5.12.17_01_02.10_av17_scrms_2nd bout	Hair_12.9.16_01_3.22_av17_scrmxxxx	Hair_12.9.16_01_3.22_av17_scrmxxxx.wav	0.579	4135	3739	0.289	0.499136	1657.5	4834	3176.5	3787.6	1181.03	93.1	7.94e-05	1.84895	25.67	-0.97	1.73	4694.2	7278.2	9517.7
128	RAv17_02	52	N	1	3	1	1	1	1	2088	19	F	English	N			NA	Y	55	38		42	43	85	0.619048	0.393939	0.512821	5.12.17_01_02.10_av17_scrms_2nd bout	Hair_12.9.16_01_3.22_av17_scrmxxxx	Hair_12.9.16_01_3.22_av17_scrmxxxx.wav	0.579	4135	3739	0.289	0.499136	1657.5	4834	3176.5	3787.6	1181.03	93.1	7.94e-05	1.84895	25.67	-0.97	1.73	4694.2	7278.2	9517.7
129	RAv17_02	49	N	1	3	31	1	0	2	390	18	F	English	N			NA	N	44	28		42	2	44	0.642857	0.454545	0.487179	5.12.17_01_02.10_av17_scrms_2nd bout	Hair_12.9.16_01_3.22_av17_scrmxxxx	Hair_12.9.16_01_3.22_av17_scrmxxxx.wav	0.579	4135	3739	0.289	0.499136	1657.5	4834	3176.5	3787.6	1181.03	93.1	7.94e-05	1.84895	25.67	-0.97	1.73	4694.2	7278.2	9517.7
130	RAv17_02	71	N	1	1	22	1	0	2	444	19	M	English	N			NA	Y	44	36		43	43	86	0.595238	0.424242	0.333333	5.12.17_01_02.10_av17_scrms_2nd bout	Hair_12.9.16_01_3.22_av17_scrmxxxx	Hair_12.9.16_01_3.22_av17_scrmxxxx.wav	0.579	4135	3739	0.289	0.499136	1657.5	4834	3176.5	3787.6	1181.03	93.1	7.94e-05	1.84895	25.67	-0.97	1.73	4694.2	7278.2	9517.7
131	RAv17_02	90	N	1	4	6	1	0	2	968	21	M	English	N			NA	N	43	24		42	42	84	0.52381	0.69697	0.641026	5.12.17_01_02.10_av17_scrms_2nd bout	Hair_12.9.16_01_3.22_av17_scrmxxxx	Hair_12.9.16_01_3.22_av17_scrmxxxx.wav	0.579	4135	3739	0.289	0.499136	1657.5	4834	3176.5	3787.6	1181.03	93.1	7.94e-05	1.84895	25.67	-0.97	1.73	4694.2	7278.2	9517.7
132	RAv17_02	25	N	1	4	1	1	0	2	2283	21	M	English	N			NA	N	56	32		34	41	75	0.5	0.575758	0.461538	5.12.17_01_02.10_av17_scrms_2nd bout	Hair_12.9.16_01_3.22_av17_scrmxxxx	Hair_12.9.16_01_3.22_av17_scrmxxxx.wav	0.579	4135	3739	0.289	0.499136	1657.5	4834	3176.5	3787.6	1181.03	93.1	7.94e-05	1.84895	25.67	-0.97	1.73	4694.2	7278.2	9517.7
133	RAv17_02	23	N	1	2	35	1	0	2	1443	20	F	Mandarin	N			NA	N	38	33		NA	NA	NA	0.52381	0.575758	0.564103	5.12.17_01_02.10_av17_scrms_2nd bout	Hair_12.9.16_01_3.22_av17_scrmxxxx	Hair_12.9.16_01_3.22_av17_scrmxxxx.wav	0.579	4135	3739	0.289	0.499136	1657.5	4834	3176.5	3787.6	1181.03	93.1	7.94e-05	1.84895	25.67	-0.97	1.73	4694.2	7278.2	9517.7
134	RAv17_02	66	N	1	1	4	1	1	1	1691	20	M	Chinese	N			NA	N	41	38		NA	NA	NA	0.47619	0.69697	0.512821	5.12.17_01_02.10_av17_scrms_2nd bout	Hair_12.9.16_01_3.22_av17_scrmxxxx	Hair_12.9.16_01_3.22_av17_scrmxxxx.wav	0.579	4135	3739	0.289	0.499136	1657.5	4834	3176.5	3787.6	1181.03	93.1	7.94e-05	1.84895	25.67	-0.97	1.73	4694.2	7278.2	9517.7
135	RAv17_02	501	Y	1	1	2	1	1	1	584	26	M	English	Y	lemurs (black white ruffed, ringtail, red bellied, crown, mongoose), Rhesus monkeys, gorillas, orangutans	Lemur: 24, Rh: 48, Gorilla: 12, Orangutan: 12	48	Y	47	37		46	44	90	0.559524	0.69697	0.461538	5.12.17_01_02.10_av17_scrms_2nd bout	Hair_12.9.16_01_3.22_av17_scrmxxxx	Hair_12.9.16_01_3.22_av17_scrmxxxx.wav	0.579	4135	3739	0.289	0.499136	1657.5	4834	3176.5	3787.6	1181.03	93.1	7.94e-05	1.84895	25.67	-0.97	1.73	4694.2	7278.2	9517.7
136	RAv17_02	24	N	1	4	14	1	0	2	334	20	M	English	N			NA	N	41	24		35	36	71	0.404762	0.363636	0.666667	5.12.17_01_02.10_av17_scrms_2nd bout	Hair_12.9.16_01_3.22_av17_scrmxxxx	Hair_12.9.16_01_3.22_av17_scrmxxxx.wav	0.579	4135	3739	0.289	0.499136	1657.5	4834	3176.5	3787.6	1181.03	93.1	7.94e-05	1.84895	25.67	-0.97	1.73	4694.2	7278.2	9517.7
137	RAv17_02	108	N	1	4	38	1	0	2	1146	19	M	English	N			NA	N	59	24		45	43	88	0.571429	0.393939	0.435897	5.12.17_01_02.10_av17_scrms_2nd bout	Hair_12.9.16_01_3.22_av17_scrmxxxx	Hair_12.9.16_01_3.22_av17_scrmxxxx.wav	0.579	4135	3739	0.289	0.499136	1657.5	4834	3176.5	3787.6	1181.03	93.1	7.94e-05	1.84895	25.67	-0.97	1.73	4694.2	7278.2	9517.7
138	RAv17_02	29	N	1	3	37	1	0	2	723	19	F	English	Y	dogs, cats	3	NA	Y	63	44		47	41	88	0.547619	0.454545	0.512821	5.12.17_01_02.10_av17_scrms_2nd bout	Hair_12.9.16_01_3.22_av17_scrmxxxx	Hair_12.9.16_01_3.22_av17_scrmxxxx.wav	0.579	4135	3739	0.289	0.499136	1657.5	4834	3176.5	3787.6	1181.03	93.1	7.94e-05	1.84895	25.67	-0.97	1.73	4694.2	7278.2	9517.7
139	RAv17_02	75	N	1	4	13	1	0	2	490	19	M	Chinese	Y	fruitfly, termites	1.5	NA	N	58	38		NA	NA	NA	0.547619	0.484848	0.461538	5.12.17_01_02.10_av17_scrms_2nd bout	Hair_12.9.16_01_3.22_av17_scrmxxxx	Hair_12.9.16_01_3.22_av17_scrmxxxx.wav	0.579	4135	3739	0.289	0.499136	1657.5	4834	3176.5	3787.6	1181.03	93.1	7.94e-05	1.84895	25.67	-0.97	1.73	4694.2	7278.2	9517.7
140	RAv17_02	33	N	1	3	4	1	0	2	330	19	F	Mandarin + English	N			NA	Y	56	33		NA	NA	NA	0.571429	0.272727	0.615385	5.12.17_01_02.10_av17_scrms_2nd bout	Hair_12.9.16_01_3.22_av17_scrmxxxx	Hair_12.9.16_01_3.22_av17_scrmxxxx.wav	0.579	4135	3739	0.289	0.499136	1657.5	4834	3176.5	3787.6	1181.03	93.1	7.94e-05	1.84895	25.67	-0.97	1.73	4694.2	7278.2	9517.7
141	RAv17_02	113	N	1	1	34	1	0	2	1227	18	F	English	N			NA	Y	52	38		47	41	88	0.583333	0.848485	0.564103	5.12.17_01_02.10_av17_scrms_2nd bout	Hair_12.9.16_01_3.22_av17_scrmxxxx	Hair_12.9.16_01_3.22_av17_scrmxxxx.wav	0.579	4135	3739	0.289	0.499136	1657.5	4834	3176.5	3787.6	1181.03	93.1	7.94e-05	1.84895	25.67	-0.97	1.73	4694.2	7278.2	9517.7
142	RAv17_02	38	N	1	3	10	1	1	1	509	18	F	English	N			NA	Y	57	36		41	41	82	0.619048	0.606061	0.615385	5.12.17_01_02.10_av17_scrms_2nd bout	Hair_12.9.16_01_3.22_av17_scrmxxxx	Hair_12.9.16_01_3.22_av17_scrmxxxx.wav	0.579	4135	3739	0.289	0.499136	1657.5	4834	3176.5	3787.6	1181.03	93.1	7.94e-05	1.84895	25.67	-0.97	1.73	4694.2	7278.2	9517.7
143	RAv17_02	103	N	1	1	31	1	0	2	411	19	F	Korean + English	Y	dogs, cats	3	NA	Y	47	39		40	41	81	0.52381	0.393939	0.512821	5.12.17_01_02.10_av17_scrms_2nd bout	Hair_12.9.16_01_3.22_av17_scrmxxxx	Hair_12.9.16_01_3.22_av17_scrmxxxx.wav	0.579	4135	3739	0.289	0.499136	1657.5	4834	3176.5	3787.6	1181.03	93.1	7.94e-05	1.84895	25.67	-0.97	1.73	4694.2	7278.2	9517.7
144	RAv17_02	60	N	1	1	9	1	0	2	215	18	F	Chinese	N			NA	Y	54	33		NA	NA	NA	0.595238	0.69697	0.615385	5.12.17_01_02.10_av17_scrms_2nd bout	Hair_12.9.16_01_3.22_av17_scrmxxxx	Hair_12.9.16_01_3.22_av17_scrmxxxx.wav	0.579	4135	3739	0.289	0.499136	1657.5	4834	3176.5	3787.6	1181.03	93.1	7.94e-05	1.84895	25.67	-0.97	1.73	4694.2	7278.2	9517.7
145	RAv17_02	16	N	1	2	17	1	0	2	457	21	F	English	Y	dogs, cats	6	NA	Y	44	43		38	40	78	0.559524	0.545455	0.461538	5.12.17_01_02.10_av17_scrms_2nd bout	Hair_12.9.16_01_3.22_av17_scrmxxxx	Hair_12.9.16_01_3.22_av17_scrmxxxx.wav	0.579	4135	3739	0.289	0.499136	1657.5	4834	3176.5	3787.6	1181.03	93.1	7.94e-05	1.84895	25.67	-0.97	1.73	4694.2	7278.2	9517.7
146	RAv17_02	37	N	1	4	2	1	0	2	275	19	F	Spanish	N			NA	Y	44	32		NA	NA	NA	0.52381	0.606061	0.641026	5.12.17_01_02.10_av17_scrms_2nd bout	Hair_12.9.16_01_3.22_av17_scrmxxxx	Hair_12.9.16_01_3.22_av17_scrmxxxx.wav	0.579	4135	3739	0.289	0.499136	1657.5	4834	3176.5	3787.6	1181.03	93.1	7.94e-05	1.84895	25.67	-0.97	1.73	4694.2	7278.2	9517.7
147	RAv17_02	86	N	1	3	21	1	0	2	251	22	M	Chinese	N			NA	Y	44	35		NA	NA	NA	0.666667	0.515152	0.641026	5.12.17_01_02.10_av17_scrms_2nd bout	Hair_12.9.16_01_3.22_av17_scrmxxxx	Hair_12.9.16_01_3.22_av17_scrmxxxx.wav	0.579	4135	3739	0.289	0.499136	1657.5	4834	3176.5	3787.6	1181.03	93.1	7.94e-05	1.84895	25.67	-0.97	1.73	4694.2	7278.2	9517.7
148	RAv17_02	98	N	1	1	39	1	0	2	683	18	F	English	N			NA	Y	36	39		37	48	85	0.690476	0.393939	0.538462	5.12.17_01_02.10_av17_scrms_2nd bout	Hair_12.9.16_01_3.22_av17_scrmxxxx	Hair_12.9.16_01_3.22_av17_scrmxxxx.wav	0.579	4135	3739	0.289	0.499136	1657.5	4834	3176.5	3787.6	1181.03	93.1	7.94e-05	1.84895	25.67	-0.97	1.73	4694.2	7278.2	9517.7
149	RAv17_02	44	N	1	4	16	1	0	2	628	31	F	English	N			NA	Y	39	34		47	45	92	0.571429	0.606061	0.333333	5.12.17_01_02.10_av17_scrms_2nd bout	Hair_12.9.16_01_3.22_av17_scrmxxxx	Hair_12.9.16_01_3.22_av17_scrmxxxx.wav	0.579	4135	3739	0.289	0.499136	1657.5	4834	3176.5	3787.6	1181.03	93.1	7.94e-05	1.84895	25.67	-0.97	1.73	4694.2	7278.2	9517.7
150	RAv17_02	96	N	1	4	12	1	0	2	346	18	F	English	N			NA	Y	59	39		44	47	91	0.583333	0.727273	0.512821	5.12.17_01_02.10_av17_scrms_2nd bout	Hair_12.9.16_01_3.22_av17_scrmxxxx	Hair_12.9.16_01_3.22_av17_scrmxxxx.wav	0.579	4135	3739	0.289	0.499136	1657.5	4834	3176.5	3787.6	1181.03	93.1	7.94e-05	1.84895	25.67	-0.97	1.73	4694.2	7278.2	9517.7
151	RAv17_02	510	Y	1	4	25	1	0	2	6585	30	M	English	Y	Rhesus macaque, Sooty mangabey	60	60	Y	NA	NA	asked for more clarification on "intense emotion" ~3 min into task	NA	NA	NA	0.511905	0.727273	0.717949	5.12.17_01_02.10_av17_scrms_2nd bout	Hair_12.9.16_01_3.22_av17_scrmxxxx	Hair_12.9.16_01_3.22_av17_scrmxxxx.wav	0.579	4135	3739	0.289	0.499136	1657.5	4834	3176.5	3787.6	1181.03	93.1	7.94e-05	1.84895	25.67	-0.97	1.73	4694.2	7278.2	9517.7
152	RAv17_02	505	Y	1	3	7	1	0	2	1888	30	F	English	Y	Rhesus macaque, horses, dogs, cats, birds, mangabey	120	94	Y	NA	NA		NA	NA	NA	0.595238	1	0.589744	5.12.17_01_02.10_av17_scrms_2nd bout	Hair_12.9.16_01_3.22_av17_scrmxxxx	Hair_12.9.16_01_3.22_av17_scrmxxxx.wav	0.579	4135	3739	0.289	0.499136	1657.5	4834	3176.5	3787.6	1181.03	93.1	7.94e-05	1.84895	25.67	-0.97	1.73	4694.2	7278.2	9517.7
153	RAv17_02	36	N	1	2	10	1	1	1	668	19	F	English	Y	dogs, cats	4	NA	Y	53	31		42	42	84	0.416667	0.606061	0.435897	5.12.17_01_02.10_av17_scrms_2nd bout	Hair_12.9.16_01_3.22_av17_scrmxxxx	Hair_12.9.16_01_3.22_av17_scrmxxxx.wav	0.579	4135	3739	0.289	0.499136	1657.5	4834	3176.5	3787.6	1181.03	93.1	7.94e-05	1.84895	25.67	-0.97	1.73	4694.2	7278.2	9517.7
154	RAv17_02	507	Y	1	2	21	1	0	2	3087	27	F	English	Y	Rhesus macaque, tufted capuchins	60	48	Y	NA	NA		NA	NA	NA	0.547619	1	0.666667	5.12.17_01_02.10_av17_scrms_2nd bout	Hair_12.9.16_01_3.22_av17_scrmxxxx	Hair_12.9.16_01_3.22_av17_scrmxxxx.wav	0.579	4135	3739	0.289	0.499136	1657.5	4834	3176.5	3787.6	1181.03	93.1	7.94e-05	1.84895	25.67	-0.97	1.73	4694.2	7278.2	9517.7
155	RAv17_02	43	N	1	1	24	1	0	2	370	19	M	English	N			NA	Y	37	39		36	40	76	0.595238	0.666667	0.589744	5.12.17_01_02.10_av17_scrms_2nd bout	Hair_12.9.16_01_3.22_av17_scrmxxxx	Hair_12.9.16_01_3.22_av17_scrmxxxx.wav	0.579	4135	3739	0.289	0.499136	1657.5	4834	3176.5	3787.6	1181.03	93.1	7.94e-05	1.84895	25.67	-0.97	1.73	4694.2	7278.2	9517.7
156	RAv17_02	95	N	1	1	29	1	0	2	426	20	F	English	N			NA	Y	57	30		39	44	83	0.571429	0.363636	0.564103	5.12.17_01_02.10_av17_scrms_2nd bout	Hair_12.9.16_01_3.22_av17_scrmxxxx	Hair_12.9.16_01_3.22_av17_scrmxxxx.wav	0.579	4135	3739	0.289	0.499136	1657.5	4834	3176.5	3787.6	1181.03	93.1	7.94e-05	1.84895	25.67	-0.97	1.73	4694.2	7278.2	9517.7
157	RAv17_02	87	N	1	1	4	1	0	2	737	19	F	Korean	N			NA	Y	53	41		NA	NA	NA	0.654762	0.787879	0.615385	5.12.17_01_02.10_av17_scrms_2nd bout	Hair_12.9.16_01_3.22_av17_scrmxxxx	Hair_12.9.16_01_3.22_av17_scrmxxxx.wav	0.579	4135	3739	0.289	0.499136	1657.5	4834	3176.5	3787.6	1181.03	93.1	7.94e-05	1.84895	25.67	-0.97	1.73	4694.2	7278.2	9517.7
158	RAv17_02	69	N	1	1	20	1	0	2	528	20	F	English	N			NA	Y	40	37		42	43	85	0.547619	0.424242	0.615385	5.12.17_01_02.10_av17_scrms_2nd bout	Hair_12.9.16_01_3.22_av17_scrmxxxx	Hair_12.9.16_01_3.22_av17_scrmxxxx.wav	0.579	4135	3739	0.289	0.499136	1657.5	4834	3176.5	3787.6	1181.03	93.1	7.94e-05	1.84895	25.67	-0.97	1.73	4694.2	7278.2	9517.7
159	RAv17_02	50	N	1	3	26	1	0	2	52	19	F	English	Y	dogs, cats	12	NA	Y	53	40		24	19	43	0.5	0.212121	0.512821	5.12.17_01_02.10_av17_scrms_2nd bout	Hair_12.9.16_01_3.22_av17_scrmxxxx	Hair_12.9.16_01_3.22_av17_scrmxxxx.wav	0.579	4135	3739	0.289	0.499136	1657.5	4834	3176.5	3787.6	1181.03	93.1	7.94e-05	1.84895	25.67	-0.97	1.73	4694.2	7278.2	9517.7
160	RAv17_02	54	N	1	3	28	1	0	2	338	18	F	Chinese	N			NA	N	35	41		NA	NA	NA	0.535714	0.424242	0.538462	5.12.17_01_02.10_av17_scrms_2nd bout	Hair_12.9.16_01_3.22_av17_scrmxxxx	Hair_12.9.16_01_3.22_av17_scrmxxxx.wav	0.579	4135	3739	0.289	0.499136	1657.5	4834	3176.5	3787.6	1181.03	93.1	7.94e-05	1.84895	25.67	-0.97	1.73	4694.2	7278.2	9517.7
161	RAv17_02	20	Y	1	3	18	1	0	2	1276	37	F	English	Y	Rhesus, chimpanzees, dogs, cats, mice, rats	180	132	Y	52	33		46	47	93	0.392857	0.454545	0.589744	5.12.17_01_02.10_av17_scrms_2nd bout	Hair_12.9.16_01_3.22_av17_scrmxxxx	Hair_12.9.16_01_3.22_av17_scrmxxxx.wav	0.579	4135	3739	0.289	0.499136	1657.5	4834	3176.5	3787.6	1181.03	93.1	7.94e-05	1.84895	25.67	-0.97	1.73	4694.2	7278.2	9517.7
162	RAv17_02	64	N	1	2	26	1	0	2	2632	18	F	English	N			NA	N	55	36		40	42	82	0.654762	0.393939	0.666667	5.12.17_01_02.10_av17_scrms_2nd bout	Hair_12.9.16_01_3.22_av17_scrmxxxx	Hair_12.9.16_01_3.22_av17_scrmxxxx.wav	0.579	4135	3739	0.289	0.499136	1657.5	4834	3176.5	3787.6	1181.03	93.1	7.94e-05	1.84895	25.67	-0.97	1.73	4694.2	7278.2	9517.7
163	RAv17_02	91	N	1	4	3	1	0	2	358	20	F	Chinese	N			NA	N	49	36		NA	NA	NA	0.547619	0.606061	0.641026	5.12.17_01_02.10_av17_scrms_2nd bout	Hair_12.9.16_01_3.22_av17_scrmxxxx	Hair_12.9.16_01_3.22_av17_scrmxxxx.wav	0.579	4135	3739	0.289	0.499136	1657.5	4834	3176.5	3787.6	1181.03	93.1	7.94e-05	1.84895	25.67	-0.97	1.73	4694.2	7278.2	9517.7
164	RAv17_02	112	N	1	3	32	1	0	2	802	18	M	Turkish	N			NA	Y	55	40		NA	NA	NA	0.535714	0.424242	0.461538	5.12.17_01_02.10_av17_scrms_2nd bout	Hair_12.9.16_01_3.22_av17_scrmxxxx	Hair_12.9.16_01_3.22_av17_scrmxxxx.wav	0.579	4135	3739	0.289	0.499136	1657.5	4834	3176.5	3787.6	1181.03	93.1	7.94e-05	1.84895	25.67	-0.97	1.73	4694.2	7278.2	9517.7
165	RAv17_02	26	N	1	4	2	1	0	2	1387	24	M	Telugu	N			NA	N	41	35		NA	NA	NA	0.607143	0.515152	0.538462	5.12.17_01_02.10_av17_scrms_2nd bout	Hair_12.9.16_01_3.22_av17_scrmxxxx	Hair_12.9.16_01_3.22_av17_scrmxxxx.wav	0.579	4135	3739	0.289	0.499136	1657.5	4834	3176.5	3787.6	1181.03	93.1	7.94e-05	1.84895	25.67	-0.97	1.73	4694.2	7278.2	9517.7
166	RAv17_02	106	N	1	3	14	1	0	2	896	18	F	Korean	N			NA	Y	53	39		NA	NA	NA	0.607143	0.606061	0.461538	5.12.17_01_02.10_av17_scrms_2nd bout	Hair_12.9.16_01_3.22_av17_scrmxxxx	Hair_12.9.16_01_3.22_av17_scrmxxxx.wav	0.579	4135	3739	0.289	0.499136	1657.5	4834	3176.5	3787.6	1181.03	93.1	7.94e-05	1.84895	25.67	-0.97	1.73	4694.2	7278.2	9517.7
167	RAv17_02	72	N	1	1	26	1	1	1	548	19	F	English	N			NA	Y	48	33		35	31	66	0.511905	0.69697	0.538462	5.12.17_01_02.10_av17_scrms_2nd bout	Hair_12.9.16_01_3.22_av17_scrmxxxx	Hair_12.9.16_01_3.22_av17_scrmxxxx.wav	0.579	4135	3739	0.289	0.499136	1657.5	4834	3176.5	3787.6	1181.03	93.1	7.94e-05	1.84895	25.67	-0.97	1.73	4694.2	7278.2	9517.7
168	RAv17_02	110	N	1	4	10	1	0	2	837	19	M	English	N			NA	Y	40	32		35	38	73	0.511905	0.69697	0.564103	5.12.17_01_02.10_av17_scrms_2nd bout	Hair_12.9.16_01_3.22_av17_scrmxxxx	Hair_12.9.16_01_3.22_av17_scrmxxxx.wav	0.579	4135	3739	0.289	0.499136	1657.5	4834	3176.5	3787.6	1181.03	93.1	7.94e-05	1.84895	25.67	-0.97	1.73	4694.2	7278.2	9517.7
169	RAv17_02	32	N	1	3	34	1	1	1	442	23	F	English	N			NA	N	58	26		34	33	67	0.559524	0.424242	0.435897	5.12.17_01_02.10_av17_scrms_2nd bout	Hair_12.9.16_01_3.22_av17_scrmxxxx	Hair_12.9.16_01_3.22_av17_scrmxxxx.wav	0.579	4135	3739	0.289	0.499136	1657.5	4834	3176.5	3787.6	1181.03	93.1	7.94e-05	1.84895	25.67	-0.97	1.73	4694.2	7278.2	9517.7
170	RAv17_02	5	N	1	1	32	1	1	1	766	29	F	English	Y	cat, dog, horse, cow	6+ years	NA	Y	41	35		46	49	95	0.583333	0.393939	0.564103	5.12.17_01_02.10_av17_scrms_2nd bout	Hair_12.9.16_01_3.22_av17_scrmxxxx	Hair_12.9.16_01_3.22_av17_scrmxxxx.wav	0.579	4135	3739	0.289	0.499136	1657.5	4834	3176.5	3787.6	1181.03	93.1	7.94e-05	1.84895	25.67	-0.97	1.73	4694.2	7278.2	9517.7
171	RAv17_02	56	N	1	1	27	1	0	2	296	18	F	Chinese	N			NA	Y	31	30		NA	NA	NA	0.595238	0.575758	0.384615	5.12.17_01_02.10_av17_scrms_2nd bout	Hair_12.9.16_01_3.22_av17_scrmxxxx	Hair_12.9.16_01_3.22_av17_scrmxxxx.wav	0.579	4135	3739	0.289	0.499136	1657.5	4834	3176.5	3787.6	1181.03	93.1	7.94e-05	1.84895	25.67	-0.97	1.73	4694.2	7278.2	9517.7
172	RAv17_02	512	Y	1	1	27	1	0	2	504	39	M	English	Y	Rhesus macaque, pigtail macaque, common chimpanzee, west lowland gorilla, Sooty mangabey	144	144	Y	NA	NA	occasionally needed to answer radio during task	NA	NA	NA	0.642857	1	0.589744	5.12.17_01_02.10_av17_scrms_2nd bout	Hair_12.9.16_01_3.22_av17_scrmxxxx	Hair_12.9.16_01_3.22_av17_scrmxxxx.wav	0.579	4135	3739	0.289	0.499136	1657.5	4834	3176.5	3787.6	1181.03	93.1	7.94e-05	1.84895	25.67	-0.97	1.73	4694.2	7278.2	9517.7
173	RAv17_02	94	N	1	3	21	1	0	2	981	20	F	English	N			NA	Y	45	44		40	44	84	0.72619	0.878788	0.410256	5.12.17_01_02.10_av17_scrms_2nd bout	Hair_12.9.16_01_3.22_av17_scrmxxxx	Hair_12.9.16_01_3.22_av17_scrmxxxx.wav	0.579	4135	3739	0.289	0.499136	1657.5	4834	3176.5	3787.6	1181.03	93.1	7.94e-05	1.84895	25.67	-0.97	1.73	4694.2	7278.2	9517.7
174	RAv17_02	101	N	1	1	33	1	1	1	892	19	F	English	Y	mice	11	NA	Y	50	40		43	43	86	0.690476	0.484848	0.487179	5.12.17_01_02.10_av17_scrms_2nd bout	Hair_12.9.16_01_3.22_av17_scrmxxxx	Hair_12.9.16_01_3.22_av17_scrmxxxx.wav	0.579	4135	3739	0.289	0.499136	1657.5	4834	3176.5	3787.6	1181.03	93.1	7.94e-05	1.84895	25.67	-0.97	1.73	4694.2	7278.2	9517.7
175	RAv17_02	88	N	1	2	38	1	1	1	1079	19	M	Mandarin	N			NA	Y	49	27		NA	NA	NA	0.547619	0.818182	0.538462	5.12.17_01_02.10_av17_scrms_2nd bout	Hair_12.9.16_01_3.22_av17_scrmxxxx	Hair_12.9.16_01_3.22_av17_scrmxxxx.wav	0.579	4135	3739	0.289	0.499136	1657.5	4834	3176.5	3787.6	1181.03	93.1	7.94e-05	1.84895	25.67	-0.97	1.73	4694.2	7278.2	9517.7
176	RAv17_02	55	N	1	1	2	1	1	1	1338	18	F	Mandarin	N			NA	Y	64	30		NA	NA	NA	0.690476	0.515152	0.410256	5.12.17_01_02.10_av17_scrms_2nd bout	Hair_12.9.16_01_3.22_av17_scrmxxxx	Hair_12.9.16_01_3.22_av17_scrmxxxx.wav	0.579	4135	3739	0.289	0.499136	1657.5	4834	3176.5	3787.6	1181.03	93.1	7.94e-05	1.84895	25.67	-0.97	1.73	4694.2	7278.2	9517.7
177	RAv17_02	41	N	1	2	25	1	0	2	219	20	M	Vietnamese	N			NA	Y	45	29		NA	NA	NA	0.630952	0.454545	0.435897	5.12.17_01_02.10_av17_scrms_2nd bout	Hair_12.9.16_01_3.22_av17_scrmxxxx	Hair_12.9.16_01_3.22_av17_scrmxxxx.wav	0.579	4135	3739	0.289	0.499136	1657.5	4834	3176.5	3787.6	1181.03	93.1	7.94e-05	1.84895	25.67	-0.97	1.73	4694.2	7278.2	9517.7
178	RAv17_02	21	N	1	2	20	1	0	2	1017	20	F	English	Y	dogs	6	NA	Y	44	37		41	34	75	0.630952	0.787879	0.384615	5.12.17_01_02.10_av17_scrms_2nd bout	Hair_12.9.16_01_3.22_av17_scrmxxxx	Hair_12.9.16_01_3.22_av17_scrmxxxx.wav	0.579	4135	3739	0.289	0.499136	1657.5	4834	3176.5	3787.6	1181.03	93.1	7.94e-05	1.84895	25.67	-0.97	1.73	4694.2	7278.2	9517.7
179	RAv17_02	15	N	1	2	17	1	1	1	1065	20	F	English and Chinese	N			NA	Y	58	36	didn't make it to face - just voice	NA	36	NA	0.488095	0.393939	0.461538	5.12.17_01_02.10_av17_scrms_2nd bout	Hair_12.9.16_01_3.22_av17_scrmxxxx	Hair_12.9.16_01_3.22_av17_scrmxxxx.wav	0.579	4135	3739	0.289	0.499136	1657.5	4834	3176.5	3787.6	1181.03	93.1	7.94e-05	1.84895	25.67	-0.97	1.73	4694.2	7278.2	9517.7
180	RAv17_02	513	Y	1	3	36	1	0	2	616	53	F	English	Y	chimps, bonobos, Rhesus macaque, Sooty mangabeys, pigtail macaque, gibbons, orangutan, stumptail macaques, baboons	288	288	Y	NA	NA		NA	NA	NA	0.535714	0.969697	0.589744	5.12.17_01_02.10_av17_scrms_2nd bout	Hair_12.9.16_01_3.22_av17_scrmxxxx	Hair_12.9.16_01_3.22_av17_scrmxxxx.wav	0.579	4135	3739	0.289	0.499136	1657.5	4834	3176.5	3787.6	1181.03	93.1	7.94e-05	1.84895	25.67	-0.97	1.73	4694.2	7278.2	9517.7
181	RAv17_02	92	N	1	3	38	1	0	2	445	18	F	English	N			NA	Y	45	30		36	36	72	0.595238	0.212121	0.589744	5.12.17_01_02.10_av17_scrms_2nd bout	Hair_12.9.16_01_3.22_av17_scrmxxxx	Hair_12.9.16_01_3.22_av17_scrmxxxx.wav	0.579	4135	3739	0.289	0.499136	1657.5	4834	3176.5	3787.6	1181.03	93.1	7.94e-05	1.84895	25.67	-0.97	1.73	4694.2	7278.2	9517.7
182	RAv17_02	10	N	1	2	13	1	0	2	363	21	F	English	N			NA	Y	50	38		36	38	74	0.559524	0.757576	0.358974	5.12.17_01_02.10_av17_scrms_2nd bout	Hair_12.9.16_01_3.22_av17_scrmxxxx	Hair_12.9.16_01_3.22_av17_scrmxxxx.wav	0.579	4135	3739	0.289	0.499136	1657.5	4834	3176.5	3787.6	1181.03	93.1	7.94e-05	1.84895	25.67	-0.97	1.73	4694.2	7278.2	9517.7
183	RAv17_02	4	N	1	2	3	1	0	2	598	20	M	English	N			NA	N	43	38		27	24	51	0.559524	0.424242	0.589744	5.12.17_01_02.10_av17_scrms_2nd bout	Hair_12.9.16_01_3.22_av17_scrmxxxx	Hair_12.9.16_01_3.22_av17_scrmxxxx.wav	0.579	4135	3739	0.289	0.499136	1657.5	4834	3176.5	3787.6	1181.03	93.1	7.94e-05	1.84895	25.67	-0.97	1.73	4694.2	7278.2	9517.7
184	RAv17_02	47	N	1	1	29	1	0	2	267	18	F	English	N			NA	Y	60	42		42	45	87	0.47619	0.30303	0.333333	5.12.17_01_02.10_av17_scrms_2nd bout	Hair_12.9.16_01_3.22_av17_scrmxxxx	Hair_12.9.16_01_3.22_av17_scrmxxxx.wav	0.579	4135	3739	0.289	0.499136	1657.5	4834	3176.5	3787.6	1181.03	93.1	7.94e-05	1.84895	25.67	-0.97	1.73	4694.2	7278.2	9517.7
185	RAv17_02	506	Y	1	3	16	1	0	2	465	37	F	English	Y	Rhesus macaque	120	120	Y	NA	NA		NA	NA	NA	0.559524	0.424242	0.487179	5.12.17_01_02.10_av17_scrms_2nd bout	Hair_12.9.16_01_3.22_av17_scrmxxxx	Hair_12.9.16_01_3.22_av17_scrmxxxx.wav	0.579	4135	3739	0.289	0.499136	1657.5	4834	3176.5	3787.6	1181.03	93.1	7.94e-05	1.84895	25.67	-0.97	1.73	4694.2	7278.2	9517.7
186	RAv17_02	9	N	1	2	20	1	0	2	1241	19	M	English	Y	dogs, cats	3	NA	Y	41	31		35	32	67	0.416667	0.121212	0.435897	5.12.17_01_02.10_av17_scrms_2nd bout	Hair_12.9.16_01_3.22_av17_scrmxxxx	Hair_12.9.16_01_3.22_av17_scrmxxxx.wav	0.579	4135	3739	0.289	0.499136	1657.5	4834	3176.5	3787.6	1181.03	93.1	7.94e-05	1.84895	25.67	-0.97	1.73	4694.2	7278.2	9517.7
187	RAv17_02	74	N	1	3	5	1	1	1	338	19	F	English	Y	cats, dogs	1	NA	Y	47	41		41	43	84	0.428571	0.272727	0.538462	5.12.17_01_02.10_av17_scrms_2nd bout	Hair_12.9.16_01_3.22_av17_scrmxxxx	Hair_12.9.16_01_3.22_av17_scrmxxxx.wav	0.579	4135	3739	0.289	0.499136	1657.5	4834	3176.5	3787.6	1181.03	93.1	7.94e-05	1.84895	25.67	-0.97	1.73	4694.2	7278.2	9517.7
188	RAv17_02	97	N	1	3	27	1	0	2	724	19	F	English	N			NA	Y	48	28		40	43	83	0.595238	0.606061	0.487179	5.12.17_01_02.10_av17_scrms_2nd bout	Hair_12.9.16_01_3.22_av17_scrmxxxx	Hair_12.9.16_01_3.22_av17_scrmxxxx.wav	0.579	4135	3739	0.289	0.499136	1657.5	4834	3176.5	3787.6	1181.03	93.1	7.94e-05	1.84895	25.67	-0.97	1.73	4694.2	7278.2	9517.7
189	RAv17_02	40	N	1	1	32	1	0	2	292	19	F	Chinese	N			NA	N	39	39		NA	NA	NA	0.666667	0.515152	0.512821	5.12.17_01_02.10_av17_scrms_2nd bout	Hair_12.9.16_01_3.22_av17_scrmxxxx	Hair_12.9.16_01_3.22_av17_scrmxxxx.wav	0.579	4135	3739	0.289	0.499136	1657.5	4834	3176.5	3787.6	1181.03	93.1	7.94e-05	1.84895	25.67	-0.97	1.73	4694.2	7278.2	9517.7
190	RAv17_02	31	N	1	2	34	1	0	2	622	18	F	English	N			NA	Y	47	35		38	40	78	0.583333	0.575758	0.384615	5.12.17_01_02.10_av17_scrms_2nd bout	Hair_12.9.16_01_3.22_av17_scrmxxxx	Hair_12.9.16_01_3.22_av17_scrmxxxx.wav	0.579	4135	3739	0.289	0.499136	1657.5	4834	3176.5	3787.6	1181.03	93.1	7.94e-05	1.84895	25.67	-0.97	1.73	4694.2	7278.2	9517.7
191	RAv17_02	14	N	1	4	26	1	0	2	973	19	M	English and Mandarin	N			NA	N	43	35		32	39	71	0.642857	0.818182	0.615385	5.12.17_01_02.10_av17_scrms_2nd bout	Hair_12.9.16_01_3.22_av17_scrmxxxx	Hair_12.9.16_01_3.22_av17_scrmxxxx.wav	0.579	4135	3739	0.289	0.499136	1657.5	4834	3176.5	3787.6	1181.03	93.1	7.94e-05	1.84895	25.67	-0.97	1.73	4694.2	7278.2	9517.7
192	RAv17_02	39	N	1	4	24	1	0	2	167	19	F	Spanish/English	N			NA	Y	55	38		41	43	84	0.583333	0.454545	0.538462	5.12.17_01_02.10_av17_scrms_2nd bout	Hair_12.9.16_01_3.22_av17_scrmxxxx	Hair_12.9.16_01_3.22_av17_scrmxxxx.wav	0.579	4135	3739	0.289	0.499136	1657.5	4834	3176.5	3787.6	1181.03	93.1	7.94e-05	1.84895	25.67	-0.97	1.73	4694.2	7278.2	9517.7
193	RAv17_02	114	N	1	3	2	1	0	2	448	19	M	English	N			NA	Y	58	35		36	38	74	0.607143	0.393939	0.512821	5.12.17_01_02.10_av17_scrms_2nd bout	Hair_12.9.16_01_3.22_av17_scrmxxxx	Hair_12.9.16_01_3.22_av17_scrmxxxx.wav	0.579	4135	3739	0.289	0.499136	1657.5	4834	3176.5	3787.6	1181.03	93.1	7.94e-05	1.84895	25.67	-0.97	1.73	4694.2	7278.2	9517.7
194	RAv17_02	11	N	1	2	12	1	1	1	1202	20	F	English (mainly) + Hindi	Y	dogs	6	NA	Y	66	45	noted w/ regard to coos that it is upsetting - sounds like they're in pain. Noted surpirse that screams would be more intense context than coos	34	41	75	0.666667	0.545455	0.641026	5.12.17_01_02.10_av17_scrms_2nd bout	Hair_12.9.16_01_3.22_av17_scrmxxxx	Hair_12.9.16_01_3.22_av17_scrmxxxx.wav	0.579	4135	3739	0.289	0.499136	1657.5	4834	3176.5	3787.6	1181.03	93.1	7.94e-05	1.84895	25.67	-0.97	1.73	4694.2	7278.2	9517.7
195	RAv17_02	73	N	1	2	38	1	1	1	560	19	F	English and Chinese	N			NA	Y	41	37		34	36	70	0.571429	0.575758	0.538462	5.12.17_01_02.10_av17_scrms_2nd bout	Hair_12.9.16_01_3.22_av17_scrmxxxx	Hair_12.9.16_01_3.22_av17_scrmxxxx.wav	0.579	4135	3739	0.289	0.499136	1657.5	4834	3176.5	3787.6	1181.03	93.1	7.94e-05	1.84895	25.67	-0.97	1.73	4694.2	7278.2	9517.7
196	RAv17_02	100	N	1	4	34	1	0	2	427	21	F	Mandarin	N			NA	Y	50	36		NA	NA	NA	0.619048	0.424242	0.641026	5.12.17_01_02.10_av17_scrms_2nd bout	Hair_12.9.16_01_3.22_av17_scrmxxxx	Hair_12.9.16_01_3.22_av17_scrmxxxx.wav	0.579	4135	3739	0.289	0.499136	1657.5	4834	3176.5	3787.6	1181.03	93.1	7.94e-05	1.84895	25.67	-0.97	1.73	4694.2	7278.2	9517.7
197	RAv17_02	67	N	1	4	28	1	0	2	1292	18	F	English	N			NA	N	29	44		32	32	64	0.75	0.636364	0.564103	5.12.17_01_02.10_av17_scrms_2nd bout	Hair_12.9.16_01_3.22_av17_scrmxxxx	Hair_12.9.16_01_3.22_av17_scrmxxxx.wav	0.579	4135	3739	0.289	0.499136	1657.5	4834	3176.5	3787.6	1181.03	93.1	7.94e-05	1.84895	25.67	-0.97	1.73	4694.2	7278.2	9517.7
198	RAv17_02	34	N	1	1	34	1	0	2	179	24	M	Mandarin	N			NA	N	15	37		NA	NA	NA	0.511905	0.757576	0.282051	5.12.17_01_02.10_av17_scrms_2nd bout	Hair_12.9.16_01_3.22_av17_scrmxxxx	Hair_12.9.16_01_3.22_av17_scrmxxxx.wav	0.579	4135	3739	0.289	0.499136	1657.5	4834	3176.5	3787.6	1181.03	93.1	7.94e-05	1.84895	25.67	-0.97	1.73	4694.2	7278.2	9517.7
199	RAv17_02	511	Y	1	4	33	1	0	2	613	24	F	English	Y	Rhesus macaque, domestic cats	24	24	Y	NA	NA		NA	NA	NA	0.571429	0.69697	0.512821	5.12.17_01_02.10_av17_scrms_2nd bout	Hair_12.9.16_01_3.22_av17_scrmxxxx	Hair_12.9.16_01_3.22_av17_scrmxxxx.wav	0.579	4135	3739	0.289	0.499136	1657.5	4834	3176.5	3787.6	1181.03	93.1	7.94e-05	1.84895	25.67	-0.97	1.73	4694.2	7278.2	9517.7
200	RAv17_02	42	N	1	1	23	1	0	2	1174	19	F	English	N			NA	N	35	28		44	44	88	0.571429	0.454545	0.692308	5.12.17_01_02.10_av17_scrms_2nd bout	Hair_12.9.16_01_3.22_av17_scrmxxxx	Hair_12.9.16_01_3.22_av17_scrmxxxx.wav	0.579	4135	3739	0.289	0.499136	1657.5	4834	3176.5	3787.6	1181.03	93.1	7.94e-05	1.84895	25.67	-0.97	1.73	4694.2	7278.2	9517.7
201	RAv17_02	3	N	1	1	23	1	0	2	820	28	M	English	N			NA	Y	39	30		45	42	87	0.559524	0.575758	0.487179	5.12.17_01_02.10_av17_scrms_2nd bout	Hair_12.9.16_01_3.22_av17_scrmxxxx	Hair_12.9.16_01_3.22_av17_scrmxxxx.wav	0.579	4135	3739	0.289	0.499136	1657.5	4834	3176.5	3787.6	1181.03	93.1	7.94e-05	1.84895	25.67	-0.97	1.73	4694.2	7278.2	9517.7
202	RAv17_02	80	N	1	1	24	1	0	2	253	18	F	English	N			NA	Y	57	34		36	3	39	0.607143	0.545455	0.358974	5.12.17_01_02.10_av17_scrms_2nd bout	Hair_12.9.16_01_3.22_av17_scrmxxxx	Hair_12.9.16_01_3.22_av17_scrmxxxx.wav	0.579	4135	3739	0.289	0.499136	1657.5	4834	3176.5	3787.6	1181.03	93.1	7.94e-05	1.84895	25.67	-0.97	1.73	4694.2	7278.2	9517.7
203	RAv17_02	84	N	1	1	5	1	0	2	583	19	F	English	N			NA	Y	34	36		35	37	72	0.547619	0.575758	0.512821	5.12.17_01_02.10_av17_scrms_2nd bout	Hair_12.9.16_01_3.22_av17_scrmxxxx	Hair_12.9.16_01_3.22_av17_scrmxxxx.wav	0.579	4135	3739	0.289	0.499136	1657.5	4834	3176.5	3787.6	1181.03	93.1	7.94e-05	1.84895	25.67	-0.97	1.73	4694.2	7278.2	9517.7
204	RAv17_02	46	N	1	1	14	1	0	2	480	18	F	English	N			NA	Y	45	25		39	42	81	0.619048	0.515152	0.589744	5.12.17_01_02.10_av17_scrms_2nd bout	Hair_12.9.16_01_3.22_av17_scrmxxxx	Hair_12.9.16_01_3.22_av17_scrmxxxx.wav	0.579	4135	3739	0.289	0.499136	1657.5	4834	3176.5	3787.6	1181.03	93.1	7.94e-05	1.84895	25.67	-0.97	1.73	4694.2	7278.2	9517.7
205	RAv17_02	27	N	1	1	20	1	1	1	281	23	F	Telugu	N			NA	N	32	44		NA	NA	NA	0.547619	0.151515	0.512821	5.12.17_01_02.10_av17_scrms_2nd bout	Hair_12.9.16_01_3.22_av17_scrmxxxx	Hair_12.9.16_01_3.22_av17_scrmxxxx.wav	0.579	4135	3739	0.289	0.499136	1657.5	4834	3176.5	3787.6	1181.03	93.1	7.94e-05	1.84895	25.67	-0.97	1.73	4694.2	7278.2	9517.7
206	RAv17_02	105	N	1	4	13	1	1	1	368	19	F	English	N			NA	Y	44	36		40	42	82	0.571429	0.606061	0.435897	5.12.17_01_02.10_av17_scrms_2nd bout	Hair_12.9.16_01_3.22_av17_scrmxxxx	Hair_12.9.16_01_3.22_av17_scrmxxxx.wav	0.579	4135	3739	0.289	0.499136	1657.5	4834	3176.5	3787.6	1181.03	93.1	7.94e-05	1.84895	25.67	-0.97	1.73	4694.2	7278.2	9517.7
207	RAv17_02	61	N	1	3	32	1	0	2	112	19	M	English	N			NA	Y	42	36		43	35	78	0.619048	0.424242	0.461538	5.12.17_01_02.10_av17_scrms_2nd bout	Hair_12.9.16_01_3.22_av17_scrmxxxx	Hair_12.9.16_01_3.22_av17_scrmxxxx.wav	0.579	4135	3739	0.289	0.499136	1657.5	4834	3176.5	3787.6	1181.03	93.1	7.94e-05	1.84895	25.67	-0.97	1.73	4694.2	7278.2	9517.7
208	RAv17_02	59	N	1	2	27	1	0	2	262	18	M	Gujarati	N			NA	N	37	38		NA	NA	NA	0.52381	0.393939	0.666667	5.12.17_01_02.10_av17_scrms_2nd bout	Hair_12.9.16_01_3.22_av17_scrmxxxx	Hair_12.9.16_01_3.22_av17_scrmxxxx.wav	0.579	4135	3739	0.289	0.499136	1657.5	4834	3176.5	3787.6	1181.03	93.1	7.94e-05	1.84895	25.67	-0.97	1.73	4694.2	7278.2	9517.7
209	RAv17_02	81	N	1	2	37	1	0	2	974	18	F	English	N			NA	Y	53	33		43	51	94	0.690476	0.454545	0.538462	5.12.17_01_02.10_av17_scrms_2nd bout	Hair_12.9.16_01_3.22_av17_scrmxxxx	Hair_12.9.16_01_3.22_av17_scrmxxxx.wav	0.579	4135	3739	0.289	0.499136	1657.5	4834	3176.5	3787.6	1181.03	93.1	7.94e-05	1.84895	25.67	-0.97	1.73	4694.2	7278.2	9517.7
210	RAv17_02	102	N	1	3	13	1	0	2	129	18	F	English	Y	elephants, dogs, tortoises	3	NA	Y	46	44		33	36	69	0.559524	0.424242	0.461538	5.12.17_01_02.10_av17_scrms_2nd bout	Hair_12.9.16_01_3.22_av17_scrmxxxx	Hair_12.9.16_01_3.22_av17_scrmxxxx.wav	0.579	4135	3739	0.289	0.499136	1657.5	4834	3176.5	3787.6	1181.03	93.1	7.94e-05	1.84895	25.67	-0.97	1.73	4694.2	7278.2	9517.7
211	RAv17_02	35	N	1	4	8	1	1	1	959	19	M	English	N			NA	N	40	21		44	39	83	0.666667	0.818182	0.641026	5.12.17_01_02.10_av17_scrms_2nd bout	Hair_12.9.16_01_3.22_av17_scrmxxxx	Hair_12.9.16_01_3.22_av17_scrmxxxx.wav	0.579	4135	3739	0.289	0.499136	1657.5	4834	3176.5	3787.6	1181.03	93.1	7.94e-05	1.84895	25.67	-0.97	1.73	4694.2	7278.2	9517.7
212	RAv17_02	93	N	1	2	3	1	0	2	734	19	F	English	N			NA	Y	53	37		38	38	76	0.52381	0.30303	0.487179	5.12.17_01_02.10_av17_scrms_2nd bout	Hair_12.9.16_01_3.22_av17_scrmxxxx	Hair_12.9.16_01_3.22_av17_scrmxxxx.wav	0.579	4135	3739	0.289	0.499136	1657.5	4834	3176.5	3787.6	1181.03	93.1	7.94e-05	1.84895	25.67	-0.97	1.73	4694.2	7278.2	9517.7
213	RAv17_02	99	N	1	2	5	1	1	1	421	19	F	English + Hindi	N			NA	Y	56	37		37	39	76	0.595238	0.30303	0.461538	5.12.17_01_02.10_av17_scrms_2nd bout	Hair_12.9.16_01_3.22_av17_scrmxxxx	Hair_12.9.16_01_3.22_av17_scrmxxxx.wav	0.579	4135	3739	0.289	0.499136	1657.5	4834	3176.5	3787.6	1181.03	93.1	7.94e-05	1.84895	25.67	-0.97	1.73	4694.2	7278.2	9517.7
214	RAv17_02	502	Y	1	4	8	1	1	1	1160	39	F	English	Y	Rhesus, pigrails, gorillas, orangutans, lemurs	216	204	Y	63	30		45	43	88	0.642857	0.909091	0.666667	5.12.17_01_02.10_av17_scrms_2nd bout	Hair_12.9.16_01_3.22_av17_scrmxxxx	Hair_12.9.16_01_3.22_av17_scrmxxxx.wav	0.579	4135	3739	0.289	0.499136	1657.5	4834	3176.5	3787.6	1181.03	93.1	7.94e-05	1.84895	25.67	-0.97	1.73	4694.2	7278.2	9517.7
215	RAv17_02	57	N	1	2	18	1	0	2	581	20	F	English	N			NA	N	29	31		27	41	68	0.547619	0.333333	0.538462	5.12.17_01_02.10_av17_scrms_2nd bout	Hair_12.9.16_01_3.22_av17_scrmxxxx	Hair_12.9.16_01_3.22_av17_scrmxxxx.wav	0.579	4135	3739	0.289	0.499136	1657.5	4834	3176.5	3787.6	1181.03	93.1	7.94e-05	1.84895	25.67	-0.97	1.73	4694.2	7278.2	9517.7
216	RAv17_02	48	N	1	3	1	1	0	2	4277	19	F	English	N			NA	Y	33	36		36	46	82	0.654762	0.606061	0.564103	5.12.17_01_02.10_av17_scrms_2nd bout	Hair_12.9.16_01_3.22_av17_scrmxxxx	Hair_12.9.16_01_3.22_av17_scrmxxxx.wav	0.579	4135	3739	0.289	0.499136	1657.5	4834	3176.5	3787.6	1181.03	93.1	7.94e-05	1.84895	25.67	-0.97	1.73	4694.2	7278.2	9517.7
217	RAv17_02	17	N	1	4	31	1	0	2	1083	19	F	Chinese	N			NA	Y	49	34		NA	NA	NA	0.595238	1	0.487179	5.12.17_01_02.10_av17_scrms_2nd bout	Hair_12.9.16_01_3.22_av17_scrmxxxx	Hair_12.9.16_01_3.22_av17_scrmxxxx.wav	0.579	4135	3739	0.289	0.499136	1657.5	4834	3176.5	3787.6	1181.03	93.1	7.94e-05	1.84895	25.67	-0.97	1.73	4694.2	7278.2	9517.7
218	RAv17_02	19	N	1	4	30	1	0	2	306	51	F	English	Y	mice	240	NA	Y	36	29		43	47	90	0.511905	0.575758	0.487179	5.12.17_01_02.10_av17_scrms_2nd bout	Hair_12.9.16_01_3.22_av17_scrmxxxx	Hair_12.9.16_01_3.22_av17_scrmxxxx.wav	0.579	4135	3739	0.289	0.499136	1657.5	4834	3176.5	3787.6	1181.03	93.1	7.94e-05	1.84895	25.67	-0.97	1.73	4694.2	7278.2	9517.7
219	RAv17_02	76	N	1	2	24	1	0	2	161	19	F	Chinese	N			NA	Y	41	41		NA	NA	NA	0.630952	0.393939	0.538462	5.12.17_01_02.10_av17_scrms_2nd bout	Hair_12.9.16_01_3.22_av17_scrmxxxx	Hair_12.9.16_01_3.22_av17_scrmxxxx.wav	0.579	4135	3739	0.289	0.499136	1657.5	4834	3176.5	3787.6	1181.03	93.1	7.94e-05	1.84895	25.67	-0.97	1.73	4694.2	7278.2	9517.7
220	RAv17_02	70	N	1	1	25	1	0	2	330	18	F	English	N			NA	Y	62	34		48	45	93	0.52381	0.242424	0.384615	5.12.17_01_02.10_av17_scrms_2nd bout	Hair_12.9.16_01_3.22_av17_scrmxxxx	Hair_12.9.16_01_3.22_av17_scrmxxxx.wav	0.579	4135	3739	0.289	0.499136	1657.5	4834	3176.5	3787.6	1181.03	93.1	7.94e-05	1.84895	25.67	-0.97	1.73	4694.2	7278.2	9517.7
221	RAv17_02	12	N	1	1	28	1	0	2	340	21	M	Chinese	N			NA	Y	41	34		NA	NA	NA	0.642857	0.484848	0.410256	5.12.17_01_02.10_av17_scrms_2nd bout	Hair_12.9.16_01_3.22_av17_scrmxxxx	Hair_12.9.16_01_3.22_av17_scrmxxxx.wav	0.579	4135	3739	0.289	0.499136	1657.5	4834	3176.5	3787.6	1181.03	93.1	7.94e-05	1.84895	25.67	-0.97	1.73	4694.2	7278.2	9517.7
222	RAv17_02	6	N	1	2	18	1	0	2	385	23	M	English	Y	mice	3	NA	Y	31	28		38	41	79	0.595238	0.484848	0.589744	5.12.17_01_02.10_av17_scrms_2nd bout	Hair_12.9.16_01_3.22_av17_scrmxxxx	Hair_12.9.16_01_3.22_av17_scrmxxxx.wav	0.579	4135	3739	0.289	0.499136	1657.5	4834	3176.5	3787.6	1181.03	93.1	7.94e-05	1.84895	25.67	-0.97	1.73	4694.2	7278.2	9517.7
223	RAv17_02	53	N	1	4	33	1	0	2	162	18	F	English	N			NA	N	71	47		22	17	39	0.642857	0.787879	0.641026	5.12.17_01_02.10_av17_scrms_2nd bout	Hair_12.9.16_01_3.22_av17_scrmxxxx	Hair_12.9.16_01_3.22_av17_scrmxxxx.wav	0.579	4135	3739	0.289	0.499136	1657.5	4834	3176.5	3787.6	1181.03	93.1	7.94e-05	1.84895	25.67	-0.97	1.73	4694.2	7278.2	9517.7
224	RAv17_02	85	N	1	2	17	1	1	1	2097	19	F	Chinese	N			NA	Y	25	32		NA	NA	NA	0.571429	0.363636	0.435897	5.12.17_01_02.10_av17_scrms_2nd bout	Hair_12.9.16_01_3.22_av17_scrmxxxx	Hair_12.9.16_01_3.22_av17_scrmxxxx.wav	0.579	4135	3739	0.289	0.499136	1657.5	4834	3176.5	3787.6	1181.03	93.1	7.94e-05	1.84895	25.67	-0.97	1.73	4694.2	7278.2	9517.7
225	RAv17_02	83	N	1	4	24	1	0	2	359	19	F	English	N			NA	Y	55	46		48	46	94	0.5	0.333333	0.487179	5.12.17_01_02.10_av17_scrms_2nd bout	Hair_12.9.16_01_3.22_av17_scrmxxxx	Hair_12.9.16_01_3.22_av17_scrmxxxx.wav	0.579	4135	3739	0.289	0.499136	1657.5	4834	3176.5	3787.6	1181.03	93.1	7.94e-05	1.84895	25.67	-0.97	1.73	4694.2	7278.2	9517.7
226	RAv17_02	111	N	1	2	18	1	0	2	155	21	F	English	N			NA	N	39	39		40	36	76	0.511905	0.575758	0.512821	5.12.17_01_02.10_av17_scrms_2nd bout	Hair_12.9.16_01_3.22_av17_scrmxxxx	Hair_12.9.16_01_3.22_av17_scrmxxxx.wav	0.579	4135	3739	0.289	0.499136	1657.5	4834	3176.5	3787.6	1181.03	93.1	7.94e-05	1.84895	25.67	-0.97	1.73	4694.2	7278.2	9517.7
227	RAv17_02	509	Y	1	2	32	1	0	2	339	28	M	Spanish/English	Y	Rhesus macaque, mangabey	48	48	Y	NA	NA		NA	NA	NA	0.464286	0.969697	0.615385	5.12.17_01_02.10_av17_scrms_2nd bout	Hair_12.9.16_01_3.22_av17_scrmxxxx	Hair_12.9.16_01_3.22_av17_scrmxxxx.wav	0.579	4135	3739	0.289	0.499136	1657.5	4834	3176.5	3787.6	1181.03	93.1	7.94e-05	1.84895	25.67	-0.97	1.73	4694.2	7278.2	9517.7
228	RAv17_02	68	N	1	4	10	1	0	2	497	19	M	Spanish	N			NA	N	48	NA	didn't fill out this questionnaire animal	NA	NA	NA	0.607143	0.333333	0.641026	5.12.17_01_02.10_av17_scrms_2nd bout	Hair_12.9.16_01_3.22_av17_scrmxxxx	Hair_12.9.16_01_3.22_av17_scrmxxxx.wav	0.579	4135	3739	0.289	0.499136	1657.5	4834	3176.5	3787.6	1181.03	93.1	7.94e-05	1.84895	25.67	-0.97	1.73	4694.2	7278.2	9517.7
229	RAv17_02	104	N	1	2	20	1	0	2	879	19	F	Bangla	N			NA	N	49	31		NA	NA	NA	0.619048	0.363636	0.384615	5.12.17_01_02.10_av17_scrms_2nd bout	Hair_12.9.16_01_3.22_av17_scrmxxxx	Hair_12.9.16_01_3.22_av17_scrmxxxx.wav	0.579	4135	3739	0.289	0.499136	1657.5	4834	3176.5	3787.6	1181.03	93.1	7.94e-05	1.84895	25.67	-0.97	1.73	4694.2	7278.2	9517.7
230	RAv17_02	77	N	1	4	19	1	0	2	601	19	M	Chinese	N			NA	Y	46	18		NA	NA	NA	0.595238	0.454545	0.538462	5.12.17_01_02.10_av17_scrms_2nd bout	Hair_12.9.16_01_3.22_av17_scrmxxxx	Hair_12.9.16_01_3.22_av17_scrmxxxx.wav	0.579	4135	3739	0.289	0.499136	1657.5	4834	3176.5	3787.6	1181.03	93.1	7.94e-05	1.84895	25.67	-0.97	1.73	4694.2	7278.2	9517.7
231	RAv17_02	22	N	1	4	19	1	0	2	1260	31	F	English	Y	dogs, cats	6	NA	Y	56	49		47	46	93	0.452381	0.515152	0.692308	5.12.17_01_02.10_av17_scrms_2nd bout	Hair_12.9.16_01_3.22_av17_scrmxxxx	Hair_12.9.16_01_3.22_av17_scrmxxxx.wav	0.579	4135	3739	0.289	0.499136	1657.5	4834	3176.5	3787.6	1181.03	93.1	7.94e-05	1.84895	25.67	-0.97	1.73	4694.2	7278.2	9517.7
232	RAv17_02	7	N	1	4	12	1	0	2	476	21	F	English	N			NA	Y	49	33		44	43	87	0.583333	0.363636	0.615385	5.12.17_01_02.10_av17_scrms_2nd bout	Hair_12.9.16_01_3.22_av17_scrmxxxx	Hair_12.9.16_01_3.22_av17_scrmxxxx.wav	0.579	4135	3739	0.289	0.499136	1657.5	4834	3176.5	3787.6	1181.03	93.1	7.94e-05	1.84895	25.67	-0.97	1.73	4694.2	7278.2	9517.7
233	RAv17_02	107	N	1	2	19	1	0	2	967	22	F	Chinese	N			NA	N	21	37		NA	NA	NA	0.595238	0.424242	0.435897	5.12.17_01_02.10_av17_scrms_2nd bout	Hair_12.9.16_01_3.22_av17_scrmxxxx	Hair_12.9.16_01_3.22_av17_scrmxxxx.wav	0.579	4135	3739	0.289	0.499136	1657.5	4834	3176.5	3787.6	1181.03	93.1	7.94e-05	1.84895	25.67	-0.97	1.73	4694.2	7278.2	9517.7
234	RAv17_02	508	Y	1	1	37	1	0	2	1236	40	F	English	Y	Rhesus macaque, pigtail macaque, sooty mangabey	192	120	Y	NA	NA		NA	NA	NA	0.511905	0.969697	0.641026	5.12.17_01_02.10_av17_scrms_2nd bout	Hair_12.9.16_01_3.22_av17_scrmxxxx	Hair_12.9.16_01_3.22_av17_scrmxxxx.wav	0.579	4135	3739	0.289	0.499136	1657.5	4834	3176.5	3787.6	1181.03	93.1	7.94e-05	1.84895	25.67	-0.97	1.73	4694.2	7278.2	9517.7
235	RAv17_02	65	N	1	4	19	1	0	2	476	20	F	Arabic	Y			NA	N	36	35		NA	NA	NA	0.559524	0.363636	0.564103	5.12.17_01_02.10_av17_scrms_2nd bout	Hair_12.9.16_01_3.22_av17_scrmxxxx	Hair_12.9.16_01_3.22_av17_scrmxxxx.wav	0.579	4135	3739	0.289	0.499136	1657.5	4834	3176.5	3787.6	1181.03	93.1	7.94e-05	1.84895	25.67	-0.97	1.73	4694.2	7278.2	9517.7
236	RAv17_02	89	N	1	2	18	1	0	2	386	18	F	Spanish	N			NA	Y	50	37		NA	NA	NA	0.619048	0.818182	0.589744	5.12.17_01_02.10_av17_scrms_2nd bout	Hair_12.9.16_01_3.22_av17_scrmxxxx	Hair_12.9.16_01_3.22_av17_scrmxxxx.wav	0.579	4135	3739	0.289	0.499136	1657.5	4834	3176.5	3787.6	1181.03	93.1	7.94e-05	1.84895	25.67	-0.97	1.73	4694.2	7278.2	9517.7
237	RAv17_02	2	N	1	1	15	1	0	2	476	19	F	English	N			NA	Y	49	42		36	37	73	0.595238	0.0606061	0.641026	5.12.17_01_02.10_av17_scrms_2nd bout	Hair_12.9.16_01_3.22_av17_scrmxxxx	Hair_12.9.16_01_3.22_av17_scrmxxxx.wav	0.579	4135	3739	0.289	0.499136	1657.5	4834	3176.5	3787.6	1181.03	93.1	7.94e-05	1.84895	25.67	-0.97	1.73	4694.2	7278.2	9517.7
238	RAv17_02	51	N	1	3	8	1	0	2	356	18	F	English	N			NA	Y	31	36		45	44	89	0.654762	0.515152	0.615385	5.12.17_01_02.10_av17_scrms_2nd bout	Hair_12.9.16_01_3.22_av17_scrmxxxx	Hair_12.9.16_01_3.22_av17_scrmxxxx.wav	0.579	4135	3739	0.289	0.499136	1657.5	4834	3176.5	3787.6	1181.03	93.1	7.94e-05	1.84895	25.67	-0.97	1.73	4694.2	7278.2	9517.7
239	RAv17_02	63	N	1	3	36	1	0	2	689	19	F	English	N			NA	N	60	40		44	42	86	0.535714	0	0.717949	5.12.17_01_02.10_av17_scrms_2nd bout	Hair_12.9.16_01_3.22_av17_scrmxxxx	Hair_12.9.16_01_3.22_av17_scrmxxxx.wav	0.579	4135	3739	0.289	0.499136	1657.5	4834	3176.5	3787.6	1181.03	93.1	7.94e-05	1.84895	25.67	-0.97	1.73	4694.2	7278.2	9517.7
240	RAv17_02	58	N	1	2	32	1	1	1	1502	21	F	Spanish	Y	mice, rats	2	NA	Y	53	33		NA	NA	NA	0.547619	0.515152	0.461538	5.12.17_01_02.10_av17_scrms_2nd bout	Hair_12.9.16_01_3.22_av17_scrmxxxx	Hair_12.9.16_01_3.22_av17_scrmxxxx.wav	0.579	4135	3739	0.289	0.499136	1657.5	4834	3176.5	3787.6	1181.03	93.1	7.94e-05	1.84895	25.67	-0.97	1.73	4694.2	7278.2	9517.7
241	RAv17_02	30	N	1	3	17	1	0	2	128	19	F	Chinese	N			NA	N	43	31		NA	NA	NA	0.535714	0.151515	0.641026	5.12.17_01_02.10_av17_scrms_2nd bout	Hair_12.9.16_01_3.22_av17_scrmxxxx	Hair_12.9.16_01_3.22_av17_scrmxxxx.wav	0.579	4135	3739	0.289	0.499136	1657.5	4834	3176.5	3787.6	1181.03	93.1	7.94e-05	1.84895	25.67	-0.97	1.73	4694.2	7278.2	9517.7
242	RAv17_02	18	N	1	1	35	1	1	1	1082	20	F	English	N			NA	Y	44	35		32	42	74	0.571429	0.151515	0.333333	5.12.17_01_02.10_av17_scrms_2nd bout	Hair_12.9.16_01_3.22_av17_scrmxxxx	Hair_12.9.16_01_3.22_av17_scrmxxxx.wav	0.579	4135	3739	0.289	0.499136	1657.5	4834	3176.5	3787.6	1181.03	93.1	7.94e-05	1.84895	25.67	-0.97	1.73	4694.2	7278.2	9517.7
243	RAv17_02	13	N	1	3	6	1	1	1	375	19	F	English	N			NA	N	21	34		42	41	83	0.5	0.666667	0.487179	5.12.17_01_02.10_av17_scrms_2nd bout	Hair_12.9.16_01_3.22_av17_scrmxxxx	Hair_12.9.16_01_3.22_av17_scrmxxxx.wav	0.579	4135	3739	0.289	0.499136	1657.5	4834	3176.5	3787.6	1181.03	93.1	7.94e-05	1.84895	25.67	-0.97	1.73	4694.2	7278.2	9517.7
244	RAv17_02	82	N	1	1	22	1	1	1	1030	18	F	Korean	Y	dogs, cats	3	NA	Y	31	40		NA	NA	NA	0.559524	0.333333	0.641026	5.12.17_01_02.10_av17_scrms_2nd bout	Hair_12.9.16_01_3.22_av17_scrmxxxx	Hair_12.9.16_01_3.22_av17_scrmxxxx.wav	0.579	4135	3739	0.289	0.499136	1657.5	4834	3176.5	3787.6	1181.03	93.1	7.94e-05	1.84895	25.67	-0.97	1.73	4694.2	7278.2	9517.7
245	RAv17_02	78	N	1	1	2	1	0	2	769	20	M	Spanish	Y	dogs, snakes	2	NA	Y	45	35		NA	NA	NA	0.547619	0.424242	0.487179	5.12.17_01_02.10_av17_scrms_2nd bout	Hair_12.9.16_01_3.22_av17_scrmxxxx	Hair_12.9.16_01_3.22_av17_scrmxxxx.wav	0.579	4135	3739	0.289	0.499136	1657.5	4834	3176.5	3787.6	1181.03	93.1	7.94e-05	1.84895	25.67	-0.97	1.73	4694.2	7278.2	9517.7
246	RAv17_02	109	N	1	2	11	1	0	2	266	20	F	English	N			NA	Y	41	33		45	43	88	0.666667	0.727273	0.384615	5.12.17_01_02.10_av17_scrms_2nd bout	Hair_12.9.16_01_3.22_av17_scrmxxxx	Hair_12.9.16_01_3.22_av17_scrmxxxx.wav	0.579	4135	3739	0.289	0.499136	1657.5	4834	3176.5	3787.6	1181.03	93.1	7.94e-05	1.84895	25.67	-0.97	1.73	4694.2	7278.2	9517.7
247	RAv17_02	115	N	1	1	15	1	0	2	470	18	M	Mandarin	N			NA	N	31	37		NA	NA	NA	0.583333	0.575758	0.461538	5.12.17_01_02.10_av17_scrms_2nd bout	Hair_12.9.16_01_3.22_av17_scrmxxxx	Hair_12.9.16_01_3.22_av17_scrmxxxx.wav	0.579	4135	3739	0.289	0.499136	1657.5	4834	3176.5	3787.6	1181.03	93.1	7.94e-05	1.84895	25.67	-0.97	1.73	4694.2	7278.2	9517.7
248	RAv17_02	28	N	1	3	14	1	0	2	963	40	F	English	N			NA	Y	50	33		42	NA	NA	0.630952	0.606061	0.564103	5.12.17_01_02.10_av17_scrms_2nd bout	Hair_12.9.16_01_3.22_av17_scrmxxxx	Hair_12.9.16_01_3.22_av17_scrmxxxx.wav	0.579	4135	3739	0.289	0.499136	1657.5	4834	3176.5	3787.6	1181.03	93.1	7.94e-05	1.84895	25.67	-0.97	1.73	4694.2	7278.2	9517.7
249	RAv17_02	8	N	1	3	23	1	1	1	2107	19	F	English	Y	dogs, cats	24	NA	Y	58	40		39	43	82	0.595238	0.363636	0.589744	5.12.17_01_02.10_av17_scrms_2nd bout	Hair_12.9.16_01_3.22_av17_scrmxxxx	Hair_12.9.16_01_3.22_av17_scrmxxxx.wav	0.579	4135	3739	0.289	0.499136	1657.5	4834	3176.5	3787.6	1181.03	93.1	7.94e-05	1.84895	25.67	-0.97	1.73	4694.2	7278.2	9517.7
250	RAv17_02	1	N	1	2	30	1	1	1	1440	20	F	English	Y	cats, dogs	12	NA	Y	38	33		NA	40	NA	0.642857	0.333333	0.564103	5.12.17_01_02.10_av17_scrms_2nd bout	Hair_12.9.16_01_3.22_av17_scrmxxxx	Hair_12.9.16_01_3.22_av17_scrmxxxx.wav	0.579	4135	3739	0.289	0.499136	1657.5	4834	3176.5	3787.6	1181.03	93.1	7.94e-05	1.84895	25.67	-0.97	1.73	4694.2	7278.2	9517.7
251	RAv17_03	85	N	1	2	11	2	1	2	540	19	F	Chinese	N			NA	Y	25	32		NA	NA	NA	0.571429	0.363636	0.435897	10.19.17_01_27.20_av17_scrms	Hair_12.9.16_01_3.22_av17_scrmxxxx	10.19.17_01_27.20_av17_scrms.wav	0.519	2618	2637	0.05	0.0963391	2452.5	3185	732.5	2879	163.04	92.3	1.9e-05	1.93531	31.53	-0.99	2.11	2713.2	3660.6	5770.9
252	RAv17_03	37	N	1	4	16	2	1	2	540	19	F	Spanish	N			NA	Y	44	32		NA	NA	NA	0.52381	0.606061	0.641026	10.19.17_01_27.20_av17_scrms	Hair_12.9.16_01_3.22_av17_scrmxxxx	10.19.17_01_27.20_av17_scrms.wav	0.519	2618	2637	0.05	0.0963391	2452.5	3185	732.5	2879	163.04	92.3	1.9e-05	1.93531	31.53	-0.99	2.11	2713.2	3660.6	5770.9
253	RAv17_03	44	N	1	4	18	2	1	2	361	31	F	English	N			NA	Y	39	34		47	45	92	0.571429	0.606061	0.333333	10.19.17_01_27.20_av17_scrms	Hair_12.9.16_01_3.22_av17_scrmxxxx	10.19.17_01_27.20_av17_scrms.wav	0.519	2618	2637	0.05	0.0963391	2452.5	3185	732.5	2879	163.04	92.3	1.9e-05	1.93531	31.53	-0.99	2.11	2713.2	3660.6	5770.9
254	RAv17_03	114	N	1	3	12	2	0	1	2181	19	M	English	N			NA	Y	58	35		36	38	74	0.607143	0.393939	0.512821	10.19.17_01_27.20_av17_scrms	Hair_12.9.16_01_3.22_av17_scrmxxxx	10.19.17_01_27.20_av17_scrms.wav	0.519	2618	2637	0.05	0.0963391	2452.5	3185	732.5	2879	163.04	92.3	1.9e-05	1.93531	31.53	-0.99	2.11	2713.2	3660.6	5770.9
255	RAv17_03	103	N	1	1	23	2	1	2	595	19	F	Korean + English	Y	dogs, cats	3	NA	Y	47	39		40	41	81	0.52381	0.393939	0.512821	10.19.17_01_27.20_av17_scrms	Hair_12.9.16_01_3.22_av17_scrmxxxx	10.19.17_01_27.20_av17_scrms.wav	0.519	2618	2637	0.05	0.0963391	2452.5	3185	732.5	2879	163.04	92.3	1.9e-05	1.93531	31.53	-0.99	2.11	2713.2	3660.6	5770.9
256	RAv17_03	11	N	1	2	19	2	0	1	778	20	F	English (mainly) + Hindi	Y	dogs	6	NA	Y	66	45	noted w/ regard to coos that it is upsetting - sounds like they're in pain. Noted surpirse that screams would be more intense context than coos	34	41	75	0.666667	0.545455	0.641026	10.19.17_01_27.20_av17_scrms	Hair_12.9.16_01_3.22_av17_scrmxxxx	10.19.17_01_27.20_av17_scrms.wav	0.519	2618	2637	0.05	0.0963391	2452.5	3185	732.5	2879	163.04	92.3	1.9e-05	1.93531	31.53	-0.99	2.11	2713.2	3660.6	5770.9
257	RAv17_03	65	N	1	4	8	2	1	2	676	20	F	Arabic	Y			NA	N	36	35		NA	NA	NA	0.559524	0.363636	0.564103	10.19.17_01_27.20_av17_scrms	Hair_12.9.16_01_3.22_av17_scrmxxxx	10.19.17_01_27.20_av17_scrms.wav	0.519	2618	2637	0.05	0.0963391	2452.5	3185	732.5	2879	163.04	92.3	1.9e-05	1.93531	31.53	-0.99	2.11	2713.2	3660.6	5770.9
258	RAv17_03	6	N	1	2	8	2	1	2	220	23	M	English	Y	mice	3	NA	Y	31	28		38	41	79	0.595238	0.484848	0.589744	10.19.17_01_27.20_av17_scrms	Hair_12.9.16_01_3.22_av17_scrmxxxx	10.19.17_01_27.20_av17_scrms.wav	0.519	2618	2637	0.05	0.0963391	2452.5	3185	732.5	2879	163.04	92.3	1.9e-05	1.93531	31.53	-0.99	2.11	2713.2	3660.6	5770.9
259	RAv17_03	104	N	1	2	29	2	1	2	469	19	F	Bangla	N			NA	N	49	31		NA	NA	NA	0.619048	0.363636	0.384615	10.19.17_01_27.20_av17_scrms	Hair_12.9.16_01_3.22_av17_scrmxxxx	10.19.17_01_27.20_av17_scrms.wav	0.519	2618	2637	0.05	0.0963391	2452.5	3185	732.5	2879	163.04	92.3	1.9e-05	1.93531	31.53	-0.99	2.11	2713.2	3660.6	5770.9
260	RAv17_03	84	N	1	1	2	2	1	2	617	19	F	English	N			NA	Y	34	36		35	37	72	0.547619	0.575758	0.512821	10.19.17_01_27.20_av17_scrms	Hair_12.9.16_01_3.22_av17_scrmxxxx	10.19.17_01_27.20_av17_scrms.wav	0.519	2618	2637	0.05	0.0963391	2452.5	3185	732.5	2879	163.04	92.3	1.9e-05	1.93531	31.53	-0.99	2.11	2713.2	3660.6	5770.9
261	RAv17_03	75	N	1	4	29	2	0	1	943	19	M	Chinese	Y	fruitfly, termites	1.5	NA	N	58	38		NA	NA	NA	0.547619	0.484848	0.461538	10.19.17_01_27.20_av17_scrms	Hair_12.9.16_01_3.22_av17_scrmxxxx	10.19.17_01_27.20_av17_scrms.wav	0.519	2618	2637	0.05	0.0963391	2452.5	3185	732.5	2879	163.04	92.3	1.9e-05	1.93531	31.53	-0.99	2.11	2713.2	3660.6	5770.9
262	RAv17_03	93	N	1	2	16	2	0	1	506	19	F	English	N			NA	Y	53	37		38	38	76	0.52381	0.30303	0.487179	10.19.17_01_27.20_av17_scrms	Hair_12.9.16_01_3.22_av17_scrmxxxx	10.19.17_01_27.20_av17_scrms.wav	0.519	2618	2637	0.05	0.0963391	2452.5	3185	732.5	2879	163.04	92.3	1.9e-05	1.93531	31.53	-0.99	2.11	2713.2	3660.6	5770.9
263	RAv17_03	39	N	1	4	32	2	0	1	350	19	F	Spanish/English	N			NA	Y	55	38		41	43	84	0.583333	0.454545	0.538462	10.19.17_01_27.20_av17_scrms	Hair_12.9.16_01_3.22_av17_scrmxxxx	10.19.17_01_27.20_av17_scrms.wav	0.519	2618	2637	0.05	0.0963391	2452.5	3185	732.5	2879	163.04	92.3	1.9e-05	1.93531	31.53	-0.99	2.11	2713.2	3660.6	5770.9
264	RAv17_03	34	N	1	1	13	2	1	2	191	24	M	Mandarin	N			NA	N	15	37		NA	NA	NA	0.511905	0.757576	0.282051	10.19.17_01_27.20_av17_scrms	Hair_12.9.16_01_3.22_av17_scrmxxxx	10.19.17_01_27.20_av17_scrms.wav	0.519	2618	2637	0.05	0.0963391	2452.5	3185	732.5	2879	163.04	92.3	1.9e-05	1.93531	31.53	-0.99	2.11	2713.2	3660.6	5770.9
265	RAv17_03	8	N	1	3	6	2	1	2	769	19	F	English	Y	dogs, cats	24	NA	Y	58	40		39	43	82	0.595238	0.363636	0.589744	10.19.17_01_27.20_av17_scrms	Hair_12.9.16_01_3.22_av17_scrmxxxx	10.19.17_01_27.20_av17_scrms.wav	0.519	2618	2637	0.05	0.0963391	2452.5	3185	732.5	2879	163.04	92.3	1.9e-05	1.93531	31.53	-0.99	2.11	2713.2	3660.6	5770.9
266	RAv17_03	52	N	1	3	26	2	0	1	400	19	F	English	N			NA	Y	55	38		42	43	85	0.619048	0.393939	0.512821	10.19.17_01_27.20_av17_scrms	Hair_12.9.16_01_3.22_av17_scrmxxxx	10.19.17_01_27.20_av17_scrms.wav	0.519	2618	2637	0.05	0.0963391	2452.5	3185	732.5	2879	163.04	92.3	1.9e-05	1.93531	31.53	-0.99	2.11	2713.2	3660.6	5770.9
267	RAv17_03	18	N	1	1	4	2	1	2	721	20	F	English	N			NA	Y	44	35		32	42	74	0.571429	0.151515	0.333333	10.19.17_01_27.20_av17_scrms	Hair_12.9.16_01_3.22_av17_scrmxxxx	10.19.17_01_27.20_av17_scrms.wav	0.519	2618	2637	0.05	0.0963391	2452.5	3185	732.5	2879	163.04	92.3	1.9e-05	1.93531	31.53	-0.99	2.11	2713.2	3660.6	5770.9
268	RAv17_03	95	N	1	1	7	2	0	1	375	20	F	English	N			NA	Y	57	30		39	44	83	0.571429	0.363636	0.564103	10.19.17_01_27.20_av17_scrms	Hair_12.9.16_01_3.22_av17_scrmxxxx	10.19.17_01_27.20_av17_scrms.wav	0.519	2618	2637	0.05	0.0963391	2452.5	3185	732.5	2879	163.04	92.3	1.9e-05	1.93531	31.53	-0.99	2.11	2713.2	3660.6	5770.9
269	RAv17_03	28	N	1	3	32	2	0	1	1117	40	F	English	N			NA	Y	50	33		42	NA	NA	0.630952	0.606061	0.564103	10.19.17_01_27.20_av17_scrms	Hair_12.9.16_01_3.22_av17_scrmxxxx	10.19.17_01_27.20_av17_scrms.wav	0.519	2618	2637	0.05	0.0963391	2452.5	3185	732.5	2879	163.04	92.3	1.9e-05	1.93531	31.53	-0.99	2.11	2713.2	3660.6	5770.9
270	RAv17_03	19	N	1	4	23	2	1	2	984	51	F	English	Y	mice	240	NA	Y	36	29		43	47	90	0.511905	0.575758	0.487179	10.19.17_01_27.20_av17_scrms	Hair_12.9.16_01_3.22_av17_scrmxxxx	10.19.17_01_27.20_av17_scrms.wav	0.519	2618	2637	0.05	0.0963391	2452.5	3185	732.5	2879	163.04	92.3	1.9e-05	1.93531	31.53	-0.99	2.11	2713.2	3660.6	5770.9
271	RAv17_03	86	N	1	3	3	2	1	2	872	22	M	Chinese	N			NA	Y	44	35		NA	NA	NA	0.666667	0.515152	0.641026	10.19.17_01_27.20_av17_scrms	Hair_12.9.16_01_3.22_av17_scrmxxxx	10.19.17_01_27.20_av17_scrms.wav	0.519	2618	2637	0.05	0.0963391	2452.5	3185	732.5	2879	163.04	92.3	1.9e-05	1.93531	31.53	-0.99	2.11	2713.2	3660.6	5770.9
272	RAv17_03	17	N	1	4	25	2	1	2	967	19	F	Chinese	N			NA	Y	49	34		NA	NA	NA	0.595238	1	0.487179	10.19.17_01_27.20_av17_scrms	Hair_12.9.16_01_3.22_av17_scrmxxxx	10.19.17_01_27.20_av17_scrms.wav	0.519	2618	2637	0.05	0.0963391	2452.5	3185	732.5	2879	163.04	92.3	1.9e-05	1.93531	31.53	-0.99	2.11	2713.2	3660.6	5770.9
273	RAv17_03	12	N	1	1	18	2	1	2	291	21	M	Chinese	N			NA	Y	41	34		NA	NA	NA	0.642857	0.484848	0.410256	10.19.17_01_27.20_av17_scrms	Hair_12.9.16_01_3.22_av17_scrmxxxx	10.19.17_01_27.20_av17_scrms.wav	0.519	2618	2637	0.05	0.0963391	2452.5	3185	732.5	2879	163.04	92.3	1.9e-05	1.93531	31.53	-0.99	2.11	2713.2	3660.6	5770.9
274	RAv17_03	106	N	1	3	35	2	1	2	322	18	F	Korean	N			NA	Y	53	39		NA	NA	NA	0.607143	0.606061	0.461538	10.19.17_01_27.20_av17_scrms	Hair_12.9.16_01_3.22_av17_scrmxxxx	10.19.17_01_27.20_av17_scrms.wav	0.519	2618	2637	0.05	0.0963391	2452.5	3185	732.5	2879	163.04	92.3	1.9e-05	1.93531	31.53	-0.99	2.11	2713.2	3660.6	5770.9
275	RAv17_03	91	N	1	4	1	2	1	2	1023	20	F	Chinese	N			NA	N	49	36		NA	NA	NA	0.547619	0.606061	0.641026	10.19.17_01_27.20_av17_scrms	Hair_12.9.16_01_3.22_av17_scrmxxxx	10.19.17_01_27.20_av17_scrms.wav	0.519	2618	2637	0.05	0.0963391	2452.5	3185	732.5	2879	163.04	92.3	1.9e-05	1.93531	31.53	-0.99	2.11	2713.2	3660.6	5770.9
276	RAv17_03	2	N	1	1	31	2	1	2	371	19	F	English	N			NA	Y	49	42		36	37	73	0.595238	0.0606061	0.641026	10.19.17_01_27.20_av17_scrms	Hair_12.9.16_01_3.22_av17_scrmxxxx	10.19.17_01_27.20_av17_scrms.wav	0.519	2618	2637	0.05	0.0963391	2452.5	3185	732.5	2879	163.04	92.3	1.9e-05	1.93531	31.53	-0.99	2.11	2713.2	3660.6	5770.9
277	RAv17_03	26	N	1	4	30	2	1	2	334	24	M	Telugu	N			NA	N	41	35		NA	NA	NA	0.607143	0.515152	0.538462	10.19.17_01_27.20_av17_scrms	Hair_12.9.16_01_3.22_av17_scrmxxxx	10.19.17_01_27.20_av17_scrms.wav	0.519	2618	2637	0.05	0.0963391	2452.5	3185	732.5	2879	163.04	92.3	1.9e-05	1.93531	31.53	-0.99	2.11	2713.2	3660.6	5770.9
278	RAv17_03	63	N	1	3	29	2	1	2	623	19	F	English	N			NA	N	60	40		44	42	86	0.535714	0	0.717949	10.19.17_01_27.20_av17_scrms	Hair_12.9.16_01_3.22_av17_scrmxxxx	10.19.17_01_27.20_av17_scrms.wav	0.519	2618	2637	0.05	0.0963391	2452.5	3185	732.5	2879	163.04	92.3	1.9e-05	1.93531	31.53	-0.99	2.11	2713.2	3660.6	5770.9
279	RAv17_03	73	N	1	2	4	2	1	2	600	19	F	English and Chinese	N			NA	Y	41	37		34	36	70	0.571429	0.575758	0.538462	10.19.17_01_27.20_av17_scrms	Hair_12.9.16_01_3.22_av17_scrmxxxx	10.19.17_01_27.20_av17_scrms.wav	0.519	2618	2637	0.05	0.0963391	2452.5	3185	732.5	2879	163.04	92.3	1.9e-05	1.93531	31.53	-0.99	2.11	2713.2	3660.6	5770.9
280	RAv17_03	76	N	1	2	22	2	1	2	635	19	F	Chinese	N			NA	Y	41	41		NA	NA	NA	0.630952	0.393939	0.538462	10.19.17_01_27.20_av17_scrms	Hair_12.9.16_01_3.22_av17_scrmxxxx	10.19.17_01_27.20_av17_scrms.wav	0.519	2618	2637	0.05	0.0963391	2452.5	3185	732.5	2879	163.04	92.3	1.9e-05	1.93531	31.53	-0.99	2.11	2713.2	3660.6	5770.9
281	RAv17_03	112	N	1	3	9	2	0	1	442	18	M	Turkish	N			NA	Y	55	40		NA	NA	NA	0.535714	0.424242	0.461538	10.19.17_01_27.20_av17_scrms	Hair_12.9.16_01_3.22_av17_scrmxxxx	10.19.17_01_27.20_av17_scrms.wav	0.519	2618	2637	0.05	0.0963391	2452.5	3185	732.5	2879	163.04	92.3	1.9e-05	1.93531	31.53	-0.99	2.11	2713.2	3660.6	5770.9
282	RAv17_03	506	Y	1	3	33	2	0	1	499	37	F	English	Y	Rhesus macaque	120	120	Y	NA	NA		NA	NA	NA	0.559524	0.424242	0.487179	10.19.17_01_27.20_av17_scrms	Hair_12.9.16_01_3.22_av17_scrmxxxx	10.19.17_01_27.20_av17_scrms.wav	0.519	2618	2637	0.05	0.0963391	2452.5	3185	732.5	2879	163.04	92.3	1.9e-05	1.93531	31.53	-0.99	2.11	2713.2	3660.6	5770.9
283	RAv17_03	90	N	1	4	21	2	1	2	539	21	M	English	N			NA	N	43	24		42	42	84	0.52381	0.69697	0.641026	10.19.17_01_27.20_av17_scrms	Hair_12.9.16_01_3.22_av17_scrmxxxx	10.19.17_01_27.20_av17_scrms.wav	0.519	2618	2637	0.05	0.0963391	2452.5	3185	732.5	2879	163.04	92.3	1.9e-05	1.93531	31.53	-0.99	2.11	2713.2	3660.6	5770.9
284	RAv17_03	83	N	1	4	21	2	0	1	526	19	F	English	N			NA	Y	55	46		48	46	94	0.5	0.333333	0.487179	10.19.17_01_27.20_av17_scrms	Hair_12.9.16_01_3.22_av17_scrmxxxx	10.19.17_01_27.20_av17_scrms.wav	0.519	2618	2637	0.05	0.0963391	2452.5	3185	732.5	2879	163.04	92.3	1.9e-05	1.93531	31.53	-0.99	2.11	2713.2	3660.6	5770.9
285	RAv17_03	54	N	1	3	35	2	0	1	614	18	F	Chinese	N			NA	N	35	41		NA	NA	NA	0.535714	0.424242	0.538462	10.19.17_01_27.20_av17_scrms	Hair_12.9.16_01_3.22_av17_scrmxxxx	10.19.17_01_27.20_av17_scrms.wav	0.519	2618	2637	0.05	0.0963391	2452.5	3185	732.5	2879	163.04	92.3	1.9e-05	1.93531	31.53	-0.99	2.11	2713.2	3660.6	5770.9
286	RAv17_03	79	N	1	2	32	2	1	2	196	21	M	English	N			NA	Y	55	38		33	34	67	0.571429	0.393939	0.564103	10.19.17_01_27.20_av17_scrms	Hair_12.9.16_01_3.22_av17_scrmxxxx	10.19.17_01_27.20_av17_scrms.wav	0.519	2618	2637	0.05	0.0963391	2452.5	3185	732.5	2879	163.04	92.3	1.9e-05	1.93531	31.53	-0.99	2.11	2713.2	3660.6	5770.9
287	RAv17_03	56	N	1	1	39	2	1	2	467	18	F	Chinese	N			NA	Y	31	30		NA	NA	NA	0.595238	0.575758	0.384615	10.19.17_01_27.20_av17_scrms	Hair_12.9.16_01_3.22_av17_scrmxxxx	10.19.17_01_27.20_av17_scrms.wav	0.519	2618	2637	0.05	0.0963391	2452.5	3185	732.5	2879	163.04	92.3	1.9e-05	1.93531	31.53	-0.99	2.11	2713.2	3660.6	5770.9
288	RAv17_03	55	N	1	1	10	2	1	2	988	18	F	Mandarin	N			NA	Y	64	30		NA	NA	NA	0.690476	0.515152	0.410256	10.19.17_01_27.20_av17_scrms	Hair_12.9.16_01_3.22_av17_scrmxxxx	10.19.17_01_27.20_av17_scrms.wav	0.519	2618	2637	0.05	0.0963391	2452.5	3185	732.5	2879	163.04	92.3	1.9e-05	1.93531	31.53	-0.99	2.11	2713.2	3660.6	5770.9
289	RAv17_03	21	N	1	2	7	2	1	2	964	20	F	English	Y	dogs	6	NA	Y	44	37		41	34	75	0.630952	0.787879	0.384615	10.19.17_01_27.20_av17_scrms	Hair_12.9.16_01_3.22_av17_scrmxxxx	10.19.17_01_27.20_av17_scrms.wav	0.519	2618	2637	0.05	0.0963391	2452.5	3185	732.5	2879	163.04	92.3	1.9e-05	1.93531	31.53	-0.99	2.11	2713.2	3660.6	5770.9
290	RAv17_03	108	N	1	4	30	2	0	1	1973	19	M	English	N			NA	N	59	24		45	43	88	0.571429	0.393939	0.435897	10.19.17_01_27.20_av17_scrms	Hair_12.9.16_01_3.22_av17_scrmxxxx	10.19.17_01_27.20_av17_scrms.wav	0.519	2618	2637	0.05	0.0963391	2452.5	3185	732.5	2879	163.04	92.3	1.9e-05	1.93531	31.53	-0.99	2.11	2713.2	3660.6	5770.9
291	RAv17_03	508	Y	1	1	20	2	1	2	1523	40	F	English	Y	Rhesus macaque, pigtail macaque, sooty mangabey	192	120	Y	NA	NA		NA	NA	NA	0.511905	0.969697	0.641026	10.19.17_01_27.20_av17_scrms	Hair_12.9.16_01_3.22_av17_scrmxxxx	10.19.17_01_27.20_av17_scrms.wav	0.519	2618	2637	0.05	0.0963391	2452.5	3185	732.5	2879	163.04	92.3	1.9e-05	1.93531	31.53	-0.99	2.11	2713.2	3660.6	5770.9
292	RAv17_03	60	N	1	1	13	2	1	2	366	18	F	Chinese	N			NA	Y	54	33		NA	NA	NA	0.595238	0.69697	0.615385	10.19.17_01_27.20_av17_scrms	Hair_12.9.16_01_3.22_av17_scrmxxxx	10.19.17_01_27.20_av17_scrms.wav	0.519	2618	2637	0.05	0.0963391	2452.5	3185	732.5	2879	163.04	92.3	1.9e-05	1.93531	31.53	-0.99	2.11	2713.2	3660.6	5770.9
293	RAv17_03	33	N	1	3	23	2	1	2	150	19	F	Mandarin + English	N			NA	Y	56	33		NA	NA	NA	0.571429	0.272727	0.615385	10.19.17_01_27.20_av17_scrms	Hair_12.9.16_01_3.22_av17_scrmxxxx	10.19.17_01_27.20_av17_scrms.wav	0.519	2618	2637	0.05	0.0963391	2452.5	3185	732.5	2879	163.04	92.3	1.9e-05	1.93531	31.53	-0.99	2.11	2713.2	3660.6	5770.9
294	RAv17_03	501	Y	1	1	28	2	1	2	247	26	M	English	Y	lemurs (black white ruffed, ringtail, red bellied, crown, mongoose), Rhesus monkeys, gorillas, orangutans	Lemur: 24, Rh: 48, Gorilla: 12, Orangutan: 12	48	Y	47	37		46	44	90	0.559524	0.69697	0.461538	10.19.17_01_27.20_av17_scrms	Hair_12.9.16_01_3.22_av17_scrmxxxx	10.19.17_01_27.20_av17_scrms.wav	0.519	2618	2637	0.05	0.0963391	2452.5	3185	732.5	2879	163.04	92.3	1.9e-05	1.93531	31.53	-0.99	2.11	2713.2	3660.6	5770.9
295	RAv17_03	68	N	1	4	5	2	1	2	1203	19	M	Spanish	N			NA	N	48	NA	didn't fill out this questionnaire animal	NA	NA	NA	0.607143	0.333333	0.641026	10.19.17_01_27.20_av17_scrms	Hair_12.9.16_01_3.22_av17_scrmxxxx	10.19.17_01_27.20_av17_scrms.wav	0.519	2618	2637	0.05	0.0963391	2452.5	3185	732.5	2879	163.04	92.3	1.9e-05	1.93531	31.53	-0.99	2.11	2713.2	3660.6	5770.9
296	RAv17_03	59	N	1	2	13	2	1	2	533	18	M	Gujarati	N			NA	N	37	38		NA	NA	NA	0.52381	0.393939	0.666667	10.19.17_01_27.20_av17_scrms	Hair_12.9.16_01_3.22_av17_scrmxxxx	10.19.17_01_27.20_av17_scrms.wav	0.519	2618	2637	0.05	0.0963391	2452.5	3185	732.5	2879	163.04	92.3	1.9e-05	1.93531	31.53	-0.99	2.11	2713.2	3660.6	5770.9
297	RAv17_03	30	N	1	3	10	2	1	2	507	19	F	Chinese	N			NA	N	43	31		NA	NA	NA	0.535714	0.151515	0.641026	10.19.17_01_27.20_av17_scrms	Hair_12.9.16_01_3.22_av17_scrmxxxx	10.19.17_01_27.20_av17_scrms.wav	0.519	2618	2637	0.05	0.0963391	2452.5	3185	732.5	2879	163.04	92.3	1.9e-05	1.93531	31.53	-0.99	2.11	2713.2	3660.6	5770.9
298	RAv17_03	27	N	1	1	19	2	0	1	3923	23	F	Telugu	N			NA	N	32	44		NA	NA	NA	0.547619	0.151515	0.512821	10.19.17_01_27.20_av17_scrms	Hair_12.9.16_01_3.22_av17_scrmxxxx	10.19.17_01_27.20_av17_scrms.wav	0.519	2618	2637	0.05	0.0963391	2452.5	3185	732.5	2879	163.04	92.3	1.9e-05	1.93531	31.53	-0.99	2.11	2713.2	3660.6	5770.9
299	RAv17_03	69	N	1	1	16	2	1	2	599	20	F	English	N			NA	Y	40	37		42	43	85	0.547619	0.424242	0.615385	10.19.17_01_27.20_av17_scrms	Hair_12.9.16_01_3.22_av17_scrmxxxx	10.19.17_01_27.20_av17_scrms.wav	0.519	2618	2637	0.05	0.0963391	2452.5	3185	732.5	2879	163.04	92.3	1.9e-05	1.93531	31.53	-0.99	2.11	2713.2	3660.6	5770.9
300	RAv17_03	507	Y	1	2	26	2	0	1	3228	27	F	English	Y	Rhesus macaque, tufted capuchins	60	48	Y	NA	NA		NA	NA	NA	0.547619	1	0.666667	10.19.17_01_27.20_av17_scrms	Hair_12.9.16_01_3.22_av17_scrmxxxx	10.19.17_01_27.20_av17_scrms.wav	0.519	2618	2637	0.05	0.0963391	2452.5	3185	732.5	2879	163.04	92.3	1.9e-05	1.93531	31.53	-0.99	2.11	2713.2	3660.6	5770.9
301	RAv17_03	109	N	1	2	28	2	0	1	631	20	F	English	N			NA	Y	41	33		45	43	88	0.666667	0.727273	0.384615	10.19.17_01_27.20_av17_scrms	Hair_12.9.16_01_3.22_av17_scrmxxxx	10.19.17_01_27.20_av17_scrms.wav	0.519	2618	2637	0.05	0.0963391	2452.5	3185	732.5	2879	163.04	92.3	1.9e-05	1.93531	31.53	-0.99	2.11	2713.2	3660.6	5770.9
302	RAv17_03	97	N	1	3	8	2	0	1	729	19	F	English	N			NA	Y	48	28		40	43	83	0.595238	0.606061	0.487179	10.19.17_01_27.20_av17_scrms	Hair_12.9.16_01_3.22_av17_scrmxxxx	10.19.17_01_27.20_av17_scrms.wav	0.519	2618	2637	0.05	0.0963391	2452.5	3185	732.5	2879	163.04	92.3	1.9e-05	1.93531	31.53	-0.99	2.11	2713.2	3660.6	5770.9
303	RAv17_03	80	N	1	1	9	2	1	2	622	18	F	English	N			NA	Y	57	34		36	3	39	0.607143	0.545455	0.358974	10.19.17_01_27.20_av17_scrms	Hair_12.9.16_01_3.22_av17_scrmxxxx	10.19.17_01_27.20_av17_scrms.wav	0.519	2618	2637	0.05	0.0963391	2452.5	3185	732.5	2879	163.04	92.3	1.9e-05	1.93531	31.53	-0.99	2.11	2713.2	3660.6	5770.9
304	RAv17_03	98	N	1	1	9	2	1	2	907	18	F	English	N			NA	Y	36	39		37	48	85	0.690476	0.393939	0.538462	10.19.17_01_27.20_av17_scrms	Hair_12.9.16_01_3.22_av17_scrmxxxx	10.19.17_01_27.20_av17_scrms.wav	0.519	2618	2637	0.05	0.0963391	2452.5	3185	732.5	2879	163.04	92.3	1.9e-05	1.93531	31.53	-0.99	2.11	2713.2	3660.6	5770.9
305	RAv17_03	1	N	1	2	32	2	0	1	1111	20	F	English	Y	cats, dogs	12	NA	Y	38	33		NA	40	NA	0.642857	0.333333	0.564103	10.19.17_01_27.20_av17_scrms	Hair_12.9.16_01_3.22_av17_scrmxxxx	10.19.17_01_27.20_av17_scrms.wav	0.519	2618	2637	0.05	0.0963391	2452.5	3185	732.5	2879	163.04	92.3	1.9e-05	1.93531	31.53	-0.99	2.11	2713.2	3660.6	5770.9
306	RAv17_03	7	N	1	4	1	2	0	1	726	21	F	English	N			NA	Y	49	33		44	43	87	0.583333	0.363636	0.615385	10.19.17_01_27.20_av17_scrms	Hair_12.9.16_01_3.22_av17_scrmxxxx	10.19.17_01_27.20_av17_scrms.wav	0.519	2618	2637	0.05	0.0963391	2452.5	3185	732.5	2879	163.04	92.3	1.9e-05	1.93531	31.53	-0.99	2.11	2713.2	3660.6	5770.9
307	RAv17_03	53	N	1	4	28	2	1	2	428	18	F	English	N			NA	N	71	47		22	17	39	0.642857	0.787879	0.641026	10.19.17_01_27.20_av17_scrms	Hair_12.9.16_01_3.22_av17_scrmxxxx	10.19.17_01_27.20_av17_scrms.wav	0.519	2618	2637	0.05	0.0963391	2452.5	3185	732.5	2879	163.04	92.3	1.9e-05	1.93531	31.53	-0.99	2.11	2713.2	3660.6	5770.9
308	RAv17_03	64	N	1	2	17	2	1	2	4964	18	F	English	N			NA	N	55	36		40	42	82	0.654762	0.393939	0.666667	10.19.17_01_27.20_av17_scrms	Hair_12.9.16_01_3.22_av17_scrmxxxx	10.19.17_01_27.20_av17_scrms.wav	0.519	2618	2637	0.05	0.0963391	2452.5	3185	732.5	2879	163.04	92.3	1.9e-05	1.93531	31.53	-0.99	2.11	2713.2	3660.6	5770.9
309	RAv17_03	49	N	1	3	8	2	1	2	530	18	F	English	N			NA	N	44	28		42	2	44	0.642857	0.454545	0.487179	10.19.17_01_27.20_av17_scrms	Hair_12.9.16_01_3.22_av17_scrmxxxx	10.19.17_01_27.20_av17_scrms.wav	0.519	2618	2637	0.05	0.0963391	2452.5	3185	732.5	2879	163.04	92.3	1.9e-05	1.93531	31.53	-0.99	2.11	2713.2	3660.6	5770.9
310	RAv17_03	50	N	1	3	25	2	1	2	419	19	F	English	Y	dogs, cats	12	NA	Y	53	40		24	19	43	0.5	0.212121	0.512821	10.19.17_01_27.20_av17_scrms	Hair_12.9.16_01_3.22_av17_scrmxxxx	10.19.17_01_27.20_av17_scrms.wav	0.519	2618	2637	0.05	0.0963391	2452.5	3185	732.5	2879	163.04	92.3	1.9e-05	1.93531	31.53	-0.99	2.11	2713.2	3660.6	5770.9
311	RAv17_03	35	N	1	4	14	2	0	1	704	19	M	English	N			NA	N	40	21		44	39	83	0.666667	0.818182	0.641026	10.19.17_01_27.20_av17_scrms	Hair_12.9.16_01_3.22_av17_scrmxxxx	10.19.17_01_27.20_av17_scrms.wav	0.519	2618	2637	0.05	0.0963391	2452.5	3185	732.5	2879	163.04	92.3	1.9e-05	1.93531	31.53	-0.99	2.11	2713.2	3660.6	5770.9
312	RAv17_03	42	N	1	1	20	2	0	1	341	19	F	English	N			NA	N	35	28		44	44	88	0.571429	0.454545	0.692308	10.19.17_01_27.20_av17_scrms	Hair_12.9.16_01_3.22_av17_scrmxxxx	10.19.17_01_27.20_av17_scrms.wav	0.519	2618	2637	0.05	0.0963391	2452.5	3185	732.5	2879	163.04	92.3	1.9e-05	1.93531	31.53	-0.99	2.11	2713.2	3660.6	5770.9
313	RAv17_03	47	N	1	1	23	2	1	2	96	18	F	English	N			NA	Y	60	42		42	45	87	0.47619	0.30303	0.333333	10.19.17_01_27.20_av17_scrms	Hair_12.9.16_01_3.22_av17_scrmxxxx	10.19.17_01_27.20_av17_scrms.wav	0.519	2618	2637	0.05	0.0963391	2452.5	3185	732.5	2879	163.04	92.3	1.9e-05	1.93531	31.53	-0.99	2.11	2713.2	3660.6	5770.9
314	RAv17_03	92	N	1	3	26	2	0	1	454	18	F	English	N			NA	Y	45	30		36	36	72	0.595238	0.212121	0.589744	10.19.17_01_27.20_av17_scrms	Hair_12.9.16_01_3.22_av17_scrmxxxx	10.19.17_01_27.20_av17_scrms.wav	0.519	2618	2637	0.05	0.0963391	2452.5	3185	732.5	2879	163.04	92.3	1.9e-05	1.93531	31.53	-0.99	2.11	2713.2	3660.6	5770.9
315	RAv17_03	100	N	1	4	35	2	1	2	1108	21	F	Mandarin	N			NA	Y	50	36		NA	NA	NA	0.619048	0.424242	0.641026	10.19.17_01_27.20_av17_scrms	Hair_12.9.16_01_3.22_av17_scrmxxxx	10.19.17_01_27.20_av17_scrms.wav	0.519	2618	2637	0.05	0.0963391	2452.5	3185	732.5	2879	163.04	92.3	1.9e-05	1.93531	31.53	-0.99	2.11	2713.2	3660.6	5770.9
316	RAv17_03	36	N	1	2	39	2	1	2	719	19	F	English	Y	dogs, cats	4	NA	Y	53	31		42	42	84	0.416667	0.606061	0.435897	10.19.17_01_27.20_av17_scrms	Hair_12.9.16_01_3.22_av17_scrmxxxx	10.19.17_01_27.20_av17_scrms.wav	0.519	2618	2637	0.05	0.0963391	2452.5	3185	732.5	2879	163.04	92.3	1.9e-05	1.93531	31.53	-0.99	2.11	2713.2	3660.6	5770.9
317	RAv17_03	43	N	1	1	12	2	1	2	528	19	M	English	N			NA	Y	37	39		36	40	76	0.595238	0.666667	0.589744	10.19.17_01_27.20_av17_scrms	Hair_12.9.16_01_3.22_av17_scrmxxxx	10.19.17_01_27.20_av17_scrms.wav	0.519	2618	2637	0.05	0.0963391	2452.5	3185	732.5	2879	163.04	92.3	1.9e-05	1.93531	31.53	-0.99	2.11	2713.2	3660.6	5770.9
318	RAv17_03	82	N	1	1	4	2	1	2	84	18	F	Korean	Y	dogs, cats	3	NA	Y	31	40		NA	NA	NA	0.559524	0.333333	0.641026	10.19.17_01_27.20_av17_scrms	Hair_12.9.16_01_3.22_av17_scrmxxxx	10.19.17_01_27.20_av17_scrms.wav	0.519	2618	2637	0.05	0.0963391	2452.5	3185	732.5	2879	163.04	92.3	1.9e-05	1.93531	31.53	-0.99	2.11	2713.2	3660.6	5770.9
319	RAv17_03	509	Y	1	2	23	2	0	1	997	28	M	Spanish/English	Y	Rhesus macaque, mangabey	48	48	Y	NA	NA		NA	NA	NA	0.464286	0.969697	0.615385	10.19.17_01_27.20_av17_scrms	Hair_12.9.16_01_3.22_av17_scrmxxxx	10.19.17_01_27.20_av17_scrms.wav	0.519	2618	2637	0.05	0.0963391	2452.5	3185	732.5	2879	163.04	92.3	1.9e-05	1.93531	31.53	-0.99	2.11	2713.2	3660.6	5770.9
320	RAv17_03	66	N	1	1	31	2	0	1	2066	20	M	Chinese	N			NA	N	41	38		NA	NA	NA	0.47619	0.69697	0.512821	10.19.17_01_27.20_av17_scrms	Hair_12.9.16_01_3.22_av17_scrmxxxx	10.19.17_01_27.20_av17_scrms.wav	0.519	2618	2637	0.05	0.0963391	2452.5	3185	732.5	2879	163.04	92.3	1.9e-05	1.93531	31.53	-0.99	2.11	2713.2	3660.6	5770.9
321	RAv17_03	40	N	1	1	31	2	1	2	273	19	F	Chinese	N			NA	N	39	39		NA	NA	NA	0.666667	0.515152	0.512821	10.19.17_01_27.20_av17_scrms	Hair_12.9.16_01_3.22_av17_scrmxxxx	10.19.17_01_27.20_av17_scrms.wav	0.519	2618	2637	0.05	0.0963391	2452.5	3185	732.5	2879	163.04	92.3	1.9e-05	1.93531	31.53	-0.99	2.11	2713.2	3660.6	5770.9
322	RAv17_03	62	N	1	1	11	2	1	2	242	18	F	English	Y	mice	1	NA	Y	59	32		46	40	86	0.559524	0.484848	0.538462	10.19.17_01_27.20_av17_scrms	Hair_12.9.16_01_3.22_av17_scrmxxxx	10.19.17_01_27.20_av17_scrms.wav	0.519	2618	2637	0.05	0.0963391	2452.5	3185	732.5	2879	163.04	92.3	1.9e-05	1.93531	31.53	-0.99	2.11	2713.2	3660.6	5770.9
323	RAv17_03	38	N	1	3	21	2	1	2	1610	18	F	English	N			NA	Y	57	36		41	41	82	0.619048	0.606061	0.615385	10.19.17_01_27.20_av17_scrms	Hair_12.9.16_01_3.22_av17_scrmxxxx	10.19.17_01_27.20_av17_scrms.wav	0.519	2618	2637	0.05	0.0963391	2452.5	3185	732.5	2879	163.04	92.3	1.9e-05	1.93531	31.53	-0.99	2.11	2713.2	3660.6	5770.9
324	RAv17_03	20	Y	1	3	34	2	1	2	644	37	F	English	Y	Rhesus, chimpanzees, dogs, cats, mice, rats	180	132	Y	52	33		46	47	93	0.392857	0.454545	0.589744	10.19.17_01_27.20_av17_scrms	Hair_12.9.16_01_3.22_av17_scrmxxxx	10.19.17_01_27.20_av17_scrms.wav	0.519	2618	2637	0.05	0.0963391	2452.5	3185	732.5	2879	163.04	92.3	1.9e-05	1.93531	31.53	-0.99	2.11	2713.2	3660.6	5770.9
325	RAv17_03	61	N	1	3	30	2	0	1	809	19	M	English	N			NA	Y	42	36		43	35	78	0.619048	0.424242	0.461538	10.19.17_01_27.20_av17_scrms	Hair_12.9.16_01_3.22_av17_scrmxxxx	10.19.17_01_27.20_av17_scrms.wav	0.519	2618	2637	0.05	0.0963391	2452.5	3185	732.5	2879	163.04	92.3	1.9e-05	1.93531	31.53	-0.99	2.11	2713.2	3660.6	5770.9
326	RAv17_03	505	Y	1	3	33	2	0	1	1296	30	F	English	Y	Rhesus macaque, horses, dogs, cats, birds, mangabey	120	94	Y	NA	NA		NA	NA	NA	0.595238	1	0.589744	10.19.17_01_27.20_av17_scrms	Hair_12.9.16_01_3.22_av17_scrmxxxx	10.19.17_01_27.20_av17_scrms.wav	0.519	2618	2637	0.05	0.0963391	2452.5	3185	732.5	2879	163.04	92.3	1.9e-05	1.93531	31.53	-0.99	2.11	2713.2	3660.6	5770.9
327	RAv17_03	10	N	1	2	11	2	0	1	1215	21	F	English	N			NA	Y	50	38		36	38	74	0.559524	0.757576	0.358974	10.19.17_01_27.20_av17_scrms	Hair_12.9.16_01_3.22_av17_scrmxxxx	10.19.17_01_27.20_av17_scrms.wav	0.519	2618	2637	0.05	0.0963391	2452.5	3185	732.5	2879	163.04	92.3	1.9e-05	1.93531	31.53	-0.99	2.11	2713.2	3660.6	5770.9
328	RAv17_03	4	N	1	2	33	2	0	1	274	20	M	English	N			NA	N	43	38		27	24	51	0.559524	0.424242	0.589744	10.19.17_01_27.20_av17_scrms	Hair_12.9.16_01_3.22_av17_scrmxxxx	10.19.17_01_27.20_av17_scrms.wav	0.519	2618	2637	0.05	0.0963391	2452.5	3185	732.5	2879	163.04	92.3	1.9e-05	1.93531	31.53	-0.99	2.11	2713.2	3660.6	5770.9
329	RAv17_03	115	N	1	1	22	2	1	2	405	18	M	Mandarin	N			NA	N	31	37		NA	NA	NA	0.583333	0.575758	0.461538	10.19.17_01_27.20_av17_scrms	Hair_12.9.16_01_3.22_av17_scrmxxxx	10.19.17_01_27.20_av17_scrms.wav	0.519	2618	2637	0.05	0.0963391	2452.5	3185	732.5	2879	163.04	92.3	1.9e-05	1.93531	31.53	-0.99	2.11	2713.2	3660.6	5770.9
330	RAv17_03	502	Y	1	4	36	2	0	1	2255	39	F	English	Y	Rhesus, pigrails, gorillas, orangutans, lemurs	216	204	Y	63	30		45	43	88	0.642857	0.909091	0.666667	10.19.17_01_27.20_av17_scrms	Hair_12.9.16_01_3.22_av17_scrmxxxx	10.19.17_01_27.20_av17_scrms.wav	0.519	2618	2637	0.05	0.0963391	2452.5	3185	732.5	2879	163.04	92.3	1.9e-05	1.93531	31.53	-0.99	2.11	2713.2	3660.6	5770.9
331	RAv17_03	511	Y	1	4	36	2	1	2	478	24	F	English	Y	Rhesus macaque, domestic cats	24	24	Y	NA	NA		NA	NA	NA	0.571429	0.69697	0.512821	10.19.17_01_27.20_av17_scrms	Hair_12.9.16_01_3.22_av17_scrmxxxx	10.19.17_01_27.20_av17_scrms.wav	0.519	2618	2637	0.05	0.0963391	2452.5	3185	732.5	2879	163.04	92.3	1.9e-05	1.93531	31.53	-0.99	2.11	2713.2	3660.6	5770.9
332	RAv17_03	88	N	1	2	39	2	1	2	958	19	M	Mandarin	N			NA	Y	49	27		NA	NA	NA	0.547619	0.818182	0.538462	10.19.17_01_27.20_av17_scrms	Hair_12.9.16_01_3.22_av17_scrmxxxx	10.19.17_01_27.20_av17_scrms.wav	0.519	2618	2637	0.05	0.0963391	2452.5	3185	732.5	2879	163.04	92.3	1.9e-05	1.93531	31.53	-0.99	2.11	2713.2	3660.6	5770.9
333	RAv17_03	89	N	1	2	39	2	0	1	242	18	F	Spanish	N			NA	Y	50	37		NA	NA	NA	0.619048	0.818182	0.589744	10.19.17_01_27.20_av17_scrms	Hair_12.9.16_01_3.22_av17_scrmxxxx	10.19.17_01_27.20_av17_scrms.wav	0.519	2618	2637	0.05	0.0963391	2452.5	3185	732.5	2879	163.04	92.3	1.9e-05	1.93531	31.53	-0.99	2.11	2713.2	3660.6	5770.9
334	RAv17_03	513	Y	1	3	10	2	0	1	730	53	F	English	Y	chimps, bonobos, Rhesus macaque, Sooty mangabeys, pigtail macaque, gibbons, orangutan, stumptail macaques, baboons	288	288	Y	NA	NA		NA	NA	NA	0.535714	0.969697	0.589744	10.19.17_01_27.20_av17_scrms	Hair_12.9.16_01_3.22_av17_scrmxxxx	10.19.17_01_27.20_av17_scrms.wav	0.519	2618	2637	0.05	0.0963391	2452.5	3185	732.5	2879	163.04	92.3	1.9e-05	1.93531	31.53	-0.99	2.11	2713.2	3660.6	5770.9
335	RAv17_03	32	N	1	3	35	2	0	1	493	23	F	English	N			NA	N	58	26		34	33	67	0.559524	0.424242	0.435897	10.19.17_01_27.20_av17_scrms	Hair_12.9.16_01_3.22_av17_scrmxxxx	10.19.17_01_27.20_av17_scrms.wav	0.519	2618	2637	0.05	0.0963391	2452.5	3185	732.5	2879	163.04	92.3	1.9e-05	1.93531	31.53	-0.99	2.11	2713.2	3660.6	5770.9
336	RAv17_03	96	N	1	4	24	2	1	2	822	18	F	English	N			NA	Y	59	39		44	47	91	0.583333	0.727273	0.512821	10.19.17_01_27.20_av17_scrms	Hair_12.9.16_01_3.22_av17_scrmxxxx	10.19.17_01_27.20_av17_scrms.wav	0.519	2618	2637	0.05	0.0963391	2452.5	3185	732.5	2879	163.04	92.3	1.9e-05	1.93531	31.53	-0.99	2.11	2713.2	3660.6	5770.9
337	RAv17_03	9	N	1	2	35	2	0	1	973	19	M	English	Y	dogs, cats	3	NA	Y	41	31		35	32	67	0.416667	0.121212	0.435897	10.19.17_01_27.20_av17_scrms	Hair_12.9.16_01_3.22_av17_scrmxxxx	10.19.17_01_27.20_av17_scrms.wav	0.519	2618	2637	0.05	0.0963391	2452.5	3185	732.5	2879	163.04	92.3	1.9e-05	1.93531	31.53	-0.99	2.11	2713.2	3660.6	5770.9
338	RAv17_03	3	N	1	1	27	2	0	1	806	28	M	English	N			NA	Y	39	30		45	42	87	0.559524	0.575758	0.487179	10.19.17_01_27.20_av17_scrms	Hair_12.9.16_01_3.22_av17_scrmxxxx	10.19.17_01_27.20_av17_scrms.wav	0.519	2618	2637	0.05	0.0963391	2452.5	3185	732.5	2879	163.04	92.3	1.9e-05	1.93531	31.53	-0.99	2.11	2713.2	3660.6	5770.9
339	RAv17_03	107	N	1	2	15	2	1	2	1052	22	F	Chinese	N			NA	N	21	37		NA	NA	NA	0.595238	0.424242	0.435897	10.19.17_01_27.20_av17_scrms	Hair_12.9.16_01_3.22_av17_scrmxxxx	10.19.17_01_27.20_av17_scrms.wav	0.519	2618	2637	0.05	0.0963391	2452.5	3185	732.5	2879	163.04	92.3	1.9e-05	1.93531	31.53	-0.99	2.11	2713.2	3660.6	5770.9
340	RAv17_03	87	N	1	1	25	2	1	2	510	19	F	Korean	N			NA	Y	53	41		NA	NA	NA	0.654762	0.787879	0.615385	10.19.17_01_27.20_av17_scrms	Hair_12.9.16_01_3.22_av17_scrmxxxx	10.19.17_01_27.20_av17_scrms.wav	0.519	2618	2637	0.05	0.0963391	2452.5	3185	732.5	2879	163.04	92.3	1.9e-05	1.93531	31.53	-0.99	2.11	2713.2	3660.6	5770.9
341	RAv17_03	81	N	1	2	7	2	1	2	238	18	F	English	N			NA	Y	53	33		43	51	94	0.690476	0.454545	0.538462	10.19.17_01_27.20_av17_scrms	Hair_12.9.16_01_3.22_av17_scrmxxxx	10.19.17_01_27.20_av17_scrms.wav	0.519	2618	2637	0.05	0.0963391	2452.5	3185	732.5	2879	163.04	92.3	1.9e-05	1.93531	31.53	-0.99	2.11	2713.2	3660.6	5770.9
342	RAv17_03	24	N	1	4	20	2	1	2	458	20	M	English	N			NA	N	41	24		35	36	71	0.404762	0.363636	0.666667	10.19.17_01_27.20_av17_scrms	Hair_12.9.16_01_3.22_av17_scrmxxxx	10.19.17_01_27.20_av17_scrms.wav	0.519	2618	2637	0.05	0.0963391	2452.5	3185	732.5	2879	163.04	92.3	1.9e-05	1.93531	31.53	-0.99	2.11	2713.2	3660.6	5770.9
343	RAv17_03	29	N	1	3	14	2	1	2	1181	19	F	English	Y	dogs, cats	3	NA	Y	63	44		47	41	88	0.547619	0.454545	0.512821	10.19.17_01_27.20_av17_scrms	Hair_12.9.16_01_3.22_av17_scrmxxxx	10.19.17_01_27.20_av17_scrms.wav	0.519	2618	2637	0.05	0.0963391	2452.5	3185	732.5	2879	163.04	92.3	1.9e-05	1.93531	31.53	-0.99	2.11	2713.2	3660.6	5770.9
344	RAv17_03	77	N	1	4	15	2	1	2	258	19	M	Chinese	N			NA	Y	46	18		NA	NA	NA	0.595238	0.454545	0.538462	10.19.17_01_27.20_av17_scrms	Hair_12.9.16_01_3.22_av17_scrmxxxx	10.19.17_01_27.20_av17_scrms.wav	0.519	2618	2637	0.05	0.0963391	2452.5	3185	732.5	2879	163.04	92.3	1.9e-05	1.93531	31.53	-0.99	2.11	2713.2	3660.6	5770.9
345	RAv17_03	25	N	1	4	37	2	0	1	880	21	M	English	N			NA	N	56	32		34	41	75	0.5	0.575758	0.461538	10.19.17_01_27.20_av17_scrms	Hair_12.9.16_01_3.22_av17_scrmxxxx	10.19.17_01_27.20_av17_scrms.wav	0.519	2618	2637	0.05	0.0963391	2452.5	3185	732.5	2879	163.04	92.3	1.9e-05	1.93531	31.53	-0.99	2.11	2713.2	3660.6	5770.9
346	RAv17_03	99	N	1	2	28	2	0	1	803	19	F	English + Hindi	N			NA	Y	56	37		37	39	76	0.595238	0.30303	0.461538	10.19.17_01_27.20_av17_scrms	Hair_12.9.16_01_3.22_av17_scrmxxxx	10.19.17_01_27.20_av17_scrms.wav	0.519	2618	2637	0.05	0.0963391	2452.5	3185	732.5	2879	163.04	92.3	1.9e-05	1.93531	31.53	-0.99	2.11	2713.2	3660.6	5770.9
347	RAv17_03	46	N	1	1	31	2	1	2	1478	18	F	English	N			NA	Y	45	25		39	42	81	0.619048	0.515152	0.589744	10.19.17_01_27.20_av17_scrms	Hair_12.9.16_01_3.22_av17_scrmxxxx	10.19.17_01_27.20_av17_scrms.wav	0.519	2618	2637	0.05	0.0963391	2452.5	3185	732.5	2879	163.04	92.3	1.9e-05	1.93531	31.53	-0.99	2.11	2713.2	3660.6	5770.9
348	RAv17_03	58	N	1	2	31	2	1	2	199	21	F	Spanish	Y	mice, rats	2	NA	Y	53	33		NA	NA	NA	0.547619	0.515152	0.461538	10.19.17_01_27.20_av17_scrms	Hair_12.9.16_01_3.22_av17_scrmxxxx	10.19.17_01_27.20_av17_scrms.wav	0.519	2618	2637	0.05	0.0963391	2452.5	3185	732.5	2879	163.04	92.3	1.9e-05	1.93531	31.53	-0.99	2.11	2713.2	3660.6	5770.9
349	RAv17_03	94	N	1	3	32	2	1	2	268	20	F	English	N			NA	Y	45	44		40	44	84	0.72619	0.878788	0.410256	10.19.17_01_27.20_av17_scrms	Hair_12.9.16_01_3.22_av17_scrmxxxx	10.19.17_01_27.20_av17_scrms.wav	0.519	2618	2637	0.05	0.0963391	2452.5	3185	732.5	2879	163.04	92.3	1.9e-05	1.93531	31.53	-0.99	2.11	2713.2	3660.6	5770.9
350	RAv17_03	67	N	1	4	21	2	1	2	547	18	F	English	N			NA	N	29	44		32	32	64	0.75	0.636364	0.564103	10.19.17_01_27.20_av17_scrms	Hair_12.9.16_01_3.22_av17_scrmxxxx	10.19.17_01_27.20_av17_scrms.wav	0.519	2618	2637	0.05	0.0963391	2452.5	3185	732.5	2879	163.04	92.3	1.9e-05	1.93531	31.53	-0.99	2.11	2713.2	3660.6	5770.9
351	RAv17_03	48	N	1	3	8	2	1	2	1841	19	F	English	N			NA	Y	33	36		36	46	82	0.654762	0.606061	0.564103	10.19.17_01_27.20_av17_scrms	Hair_12.9.16_01_3.22_av17_scrmxxxx	10.19.17_01_27.20_av17_scrms.wav	0.519	2618	2637	0.05	0.0963391	2452.5	3185	732.5	2879	163.04	92.3	1.9e-05	1.93531	31.53	-0.99	2.11	2713.2	3660.6	5770.9
352	RAv17_03	15	N	1	2	39	2	1	2	1903	20	F	English and Chinese	N			NA	Y	58	36	didn't make it to face - just voice	NA	36	NA	0.488095	0.393939	0.461538	10.19.17_01_27.20_av17_scrms	Hair_12.9.16_01_3.22_av17_scrmxxxx	10.19.17_01_27.20_av17_scrms.wav	0.519	2618	2637	0.05	0.0963391	2452.5	3185	732.5	2879	163.04	92.3	1.9e-05	1.93531	31.53	-0.99	2.11	2713.2	3660.6	5770.9
353	RAv17_03	72	N	1	1	7	2	1	2	182	19	F	English	N			NA	Y	48	33		35	31	66	0.511905	0.69697	0.538462	10.19.17_01_27.20_av17_scrms	Hair_12.9.16_01_3.22_av17_scrmxxxx	10.19.17_01_27.20_av17_scrms.wav	0.519	2618	2637	0.05	0.0963391	2452.5	3185	732.5	2879	163.04	92.3	1.9e-05	1.93531	31.53	-0.99	2.11	2713.2	3660.6	5770.9
354	RAv17_03	23	N	1	2	13	2	1	2	1664	20	F	Mandarin	N			NA	N	38	33		NA	NA	NA	0.52381	0.575758	0.564103	10.19.17_01_27.20_av17_scrms	Hair_12.9.16_01_3.22_av17_scrmxxxx	10.19.17_01_27.20_av17_scrms.wav	0.519	2618	2637	0.05	0.0963391	2452.5	3185	732.5	2879	163.04	92.3	1.9e-05	1.93531	31.53	-0.99	2.11	2713.2	3660.6	5770.9
355	RAv17_03	70	N	1	1	32	2	1	2	73	18	F	English	N			NA	Y	62	34		48	45	93	0.52381	0.242424	0.384615	10.19.17_01_27.20_av17_scrms	Hair_12.9.16_01_3.22_av17_scrmxxxx	10.19.17_01_27.20_av17_scrms.wav	0.519	2618	2637	0.05	0.0963391	2452.5	3185	732.5	2879	163.04	92.3	1.9e-05	1.93531	31.53	-0.99	2.11	2713.2	3660.6	5770.9
356	RAv17_03	111	N	1	2	27	2	1	2	1644	21	F	English	N			NA	N	39	39		40	36	76	0.511905	0.575758	0.512821	10.19.17_01_27.20_av17_scrms	Hair_12.9.16_01_3.22_av17_scrmxxxx	10.19.17_01_27.20_av17_scrms.wav	0.519	2618	2637	0.05	0.0963391	2452.5	3185	732.5	2879	163.04	92.3	1.9e-05	1.93531	31.53	-0.99	2.11	2713.2	3660.6	5770.9
357	RAv17_03	510	Y	1	4	29	2	1	2	538	30	M	English	Y	Rhesus macaque, Sooty mangabey	60	60	Y	NA	NA	asked for more clarification on "intense emotion" ~3 min into task	NA	NA	NA	0.511905	0.727273	0.717949	10.19.17_01_27.20_av17_scrms	Hair_12.9.16_01_3.22_av17_scrmxxxx	10.19.17_01_27.20_av17_scrms.wav	0.519	2618	2637	0.05	0.0963391	2452.5	3185	732.5	2879	163.04	92.3	1.9e-05	1.93531	31.53	-0.99	2.11	2713.2	3660.6	5770.9
358	RAv17_03	41	N	1	2	27	2	1	2	229	20	M	Vietnamese	N			NA	Y	45	29		NA	NA	NA	0.630952	0.454545	0.435897	10.19.17_01_27.20_av17_scrms	Hair_12.9.16_01_3.22_av17_scrmxxxx	10.19.17_01_27.20_av17_scrms.wav	0.519	2618	2637	0.05	0.0963391	2452.5	3185	732.5	2879	163.04	92.3	1.9e-05	1.93531	31.53	-0.99	2.11	2713.2	3660.6	5770.9
359	RAv17_03	78	N	1	1	9	2	1	2	625	20	M	Spanish	Y	dogs, snakes	2	NA	Y	45	35		NA	NA	NA	0.547619	0.424242	0.487179	10.19.17_01_27.20_av17_scrms	Hair_12.9.16_01_3.22_av17_scrmxxxx	10.19.17_01_27.20_av17_scrms.wav	0.519	2618	2637	0.05	0.0963391	2452.5	3185	732.5	2879	163.04	92.3	1.9e-05	1.93531	31.53	-0.99	2.11	2713.2	3660.6	5770.9
360	RAv17_03	57	N	1	2	13	2	1	2	336	20	F	English	N			NA	N	29	31		27	41	68	0.547619	0.333333	0.538462	10.19.17_01_27.20_av17_scrms	Hair_12.9.16_01_3.22_av17_scrmxxxx	10.19.17_01_27.20_av17_scrms.wav	0.519	2618	2637	0.05	0.0963391	2452.5	3185	732.5	2879	163.04	92.3	1.9e-05	1.93531	31.53	-0.99	2.11	2713.2	3660.6	5770.9
361	RAv17_03	102	N	1	3	39	2	1	2	383	18	F	English	Y	elephants, dogs, tortoises	3	NA	Y	46	44		33	36	69	0.559524	0.424242	0.461538	10.19.17_01_27.20_av17_scrms	Hair_12.9.16_01_3.22_av17_scrmxxxx	10.19.17_01_27.20_av17_scrms.wav	0.519	2618	2637	0.05	0.0963391	2452.5	3185	732.5	2879	163.04	92.3	1.9e-05	1.93531	31.53	-0.99	2.11	2713.2	3660.6	5770.9
362	RAv17_03	105	N	1	4	17	2	0	1	432	19	F	English	N			NA	Y	44	36		40	42	82	0.571429	0.606061	0.435897	10.19.17_01_27.20_av17_scrms	Hair_12.9.16_01_3.22_av17_scrmxxxx	10.19.17_01_27.20_av17_scrms.wav	0.519	2618	2637	0.05	0.0963391	2452.5	3185	732.5	2879	163.04	92.3	1.9e-05	1.93531	31.53	-0.99	2.11	2713.2	3660.6	5770.9
363	RAv17_03	51	N	1	3	36	2	0	1	1205	18	F	English	N			NA	Y	31	36		45	44	89	0.654762	0.515152	0.615385	10.19.17_01_27.20_av17_scrms	Hair_12.9.16_01_3.22_av17_scrmxxxx	10.19.17_01_27.20_av17_scrms.wav	0.519	2618	2637	0.05	0.0963391	2452.5	3185	732.5	2879	163.04	92.3	1.9e-05	1.93531	31.53	-0.99	2.11	2713.2	3660.6	5770.9
364	RAv17_03	512	Y	1	1	4	2	1	2	687	39	M	English	Y	Rhesus macaque, pigtail macaque, common chimpanzee, west lowland gorilla, Sooty mangabey	144	144	Y	NA	NA	occasionally needed to answer radio during task	NA	NA	NA	0.642857	1	0.589744	10.19.17_01_27.20_av17_scrms	Hair_12.9.16_01_3.22_av17_scrmxxxx	10.19.17_01_27.20_av17_scrms.wav	0.519	2618	2637	0.05	0.0963391	2452.5	3185	732.5	2879	163.04	92.3	1.9e-05	1.93531	31.53	-0.99	2.11	2713.2	3660.6	5770.9
365	RAv17_03	31	N	1	2	36	2	0	1	1209	18	F	English	N			NA	Y	47	35		38	40	78	0.583333	0.575758	0.384615	10.19.17_01_27.20_av17_scrms	Hair_12.9.16_01_3.22_av17_scrmxxxx	10.19.17_01_27.20_av17_scrms.wav	0.519	2618	2637	0.05	0.0963391	2452.5	3185	732.5	2879	163.04	92.3	1.9e-05	1.93531	31.53	-0.99	2.11	2713.2	3660.6	5770.9
366	RAv17_03	13	N	1	3	17	2	1	2	192	19	F	English	N			NA	N	21	34		42	41	83	0.5	0.666667	0.487179	10.19.17_01_27.20_av17_scrms	Hair_12.9.16_01_3.22_av17_scrmxxxx	10.19.17_01_27.20_av17_scrms.wav	0.519	2618	2637	0.05	0.0963391	2452.5	3185	732.5	2879	163.04	92.3	1.9e-05	1.93531	31.53	-0.99	2.11	2713.2	3660.6	5770.9
367	RAv17_03	74	N	1	3	9	2	0	1	416	19	F	English	Y	cats, dogs	1	NA	Y	47	41		41	43	84	0.428571	0.272727	0.538462	10.19.17_01_27.20_av17_scrms	Hair_12.9.16_01_3.22_av17_scrmxxxx	10.19.17_01_27.20_av17_scrms.wav	0.519	2618	2637	0.05	0.0963391	2452.5	3185	732.5	2879	163.04	92.3	1.9e-05	1.93531	31.53	-0.99	2.11	2713.2	3660.6	5770.9
368	RAv17_03	101	N	1	1	16	2	1	2	388	19	F	English	Y	mice	11	NA	Y	50	40		43	43	86	0.690476	0.484848	0.487179	10.19.17_01_27.20_av17_scrms	Hair_12.9.16_01_3.22_av17_scrmxxxx	10.19.17_01_27.20_av17_scrms.wav	0.519	2618	2637	0.05	0.0963391	2452.5	3185	732.5	2879	163.04	92.3	1.9e-05	1.93531	31.53	-0.99	2.11	2713.2	3660.6	5770.9
369	RAv17_03	16	N	1	2	34	2	1	2	409	21	F	English	Y	dogs, cats	6	NA	Y	44	43		38	40	78	0.559524	0.545455	0.461538	10.19.17_01_27.20_av17_scrms	Hair_12.9.16_01_3.22_av17_scrmxxxx	10.19.17_01_27.20_av17_scrms.wav	0.519	2618	2637	0.05	0.0963391	2452.5	3185	732.5	2879	163.04	92.3	1.9e-05	1.93531	31.53	-0.99	2.11	2713.2	3660.6	5770.9
370	RAv17_03	22	N	1	4	1	2	0	1	2262	31	F	English	Y	dogs, cats	6	NA	Y	56	49		47	46	93	0.452381	0.515152	0.692308	10.19.17_01_27.20_av17_scrms	Hair_12.9.16_01_3.22_av17_scrmxxxx	10.19.17_01_27.20_av17_scrms.wav	0.519	2618	2637	0.05	0.0963391	2452.5	3185	732.5	2879	163.04	92.3	1.9e-05	1.93531	31.53	-0.99	2.11	2713.2	3660.6	5770.9
371	RAv17_03	113	N	1	1	12	2	1	2	656	18	F	English	N			NA	Y	52	38		47	41	88	0.583333	0.848485	0.564103	10.19.17_01_27.20_av17_scrms	Hair_12.9.16_01_3.22_av17_scrmxxxx	10.19.17_01_27.20_av17_scrms.wav	0.519	2618	2637	0.05	0.0963391	2452.5	3185	732.5	2879	163.04	92.3	1.9e-05	1.93531	31.53	-0.99	2.11	2713.2	3660.6	5770.9
372	RAv17_03	14	N	1	4	39	2	1	2	688	19	M	English and Mandarin	N			NA	N	43	35		32	39	71	0.642857	0.818182	0.615385	10.19.17_01_27.20_av17_scrms	Hair_12.9.16_01_3.22_av17_scrmxxxx	10.19.17_01_27.20_av17_scrms.wav	0.519	2618	2637	0.05	0.0963391	2452.5	3185	732.5	2879	163.04	92.3	1.9e-05	1.93531	31.53	-0.99	2.11	2713.2	3660.6	5770.9
373	RAv17_03	71	N	1	1	39	2	1	2	331	19	M	English	N			NA	Y	44	36		43	43	86	0.595238	0.424242	0.333333	10.19.17_01_27.20_av17_scrms	Hair_12.9.16_01_3.22_av17_scrmxxxx	10.19.17_01_27.20_av17_scrms.wav	0.519	2618	2637	0.05	0.0963391	2452.5	3185	732.5	2879	163.04	92.3	1.9e-05	1.93531	31.53	-0.99	2.11	2713.2	3660.6	5770.9
374	RAv17_03	110	N	1	4	25	2	0	1	530	19	M	English	N			NA	Y	40	32		35	38	73	0.511905	0.69697	0.564103	10.19.17_01_27.20_av17_scrms	Hair_12.9.16_01_3.22_av17_scrmxxxx	10.19.17_01_27.20_av17_scrms.wav	0.519	2618	2637	0.05	0.0963391	2452.5	3185	732.5	2879	163.04	92.3	1.9e-05	1.93531	31.53	-0.99	2.11	2713.2	3660.6	5770.9
375	RAv17_03	5	N	1	1	24	2	1	2	1630	29	F	English	Y	cat, dog, horse, cow	6+ years	NA	Y	41	35		46	49	95	0.583333	0.393939	0.564103	10.19.17_01_27.20_av17_scrms	Hair_12.9.16_01_3.22_av17_scrmxxxx	10.19.17_01_27.20_av17_scrms.wav	0.519	2618	2637	0.05	0.0963391	2452.5	3185	732.5	2879	163.04	92.3	1.9e-05	1.93531	31.53	-0.99	2.11	2713.2	3660.6	5770.9
376	RAv17_04	513	Y	1	3	29	1	0	2	16	53	F	English	Y	chimps, bonobos, Rhesus macaque, Sooty mangabeys, pigtail macaque, gibbons, orangutan, stumptail macaques, baboons	288	288	Y	NA	NA		NA	NA	NA	0.535714	0.969697	0.589744	5.12.17_01_02.10_av17_scrms_1st bout	5.8.17_03_27.15_av17_scrm	5.8.17_03_27.15_av17_scrm.wav	0.708	2733	3952	0.106	0.149718	2733.9	4758.4	2024.5	3876.8	385.59	95.8	9.3e-06	1.96007	23.77	-0.73	2.4	4349.7	6158.5	7622.8
377	RAv17_04	1	N	1	2	14	1	0	2	534	20	F	English	Y	cats, dogs	12	NA	Y	38	33		NA	40	NA	0.642857	0.333333	0.564103	5.12.17_01_02.10_av17_scrms_1st bout	5.8.17_03_27.15_av17_scrm	5.8.17_03_27.15_av17_scrm.wav	0.708	2733	3952	0.106	0.149718	2733.9	4758.4	2024.5	3876.8	385.59	95.8	9.3e-06	1.96007	23.77	-0.73	2.4	4349.7	6158.5	7622.8
378	RAv17_04	98	N	1	1	33	1	0	2	336	18	F	English	N			NA	Y	36	39		37	48	85	0.690476	0.393939	0.538462	5.12.17_01_02.10_av17_scrms_1st bout	5.8.17_03_27.15_av17_scrm	5.8.17_03_27.15_av17_scrm.wav	0.708	2733	3952	0.106	0.149718	2733.9	4758.4	2024.5	3876.8	385.59	95.8	9.3e-06	1.96007	23.77	-0.73	2.4	4349.7	6158.5	7622.8
379	RAv17_04	28	N	1	3	13	1	0	2	463	40	F	English	N			NA	Y	50	33		42	NA	NA	0.630952	0.606061	0.564103	5.12.17_01_02.10_av17_scrms_1st bout	5.8.17_03_27.15_av17_scrm	5.8.17_03_27.15_av17_scrm.wav	0.708	2733	3952	0.106	0.149718	2733.9	4758.4	2024.5	3876.8	385.59	95.8	9.3e-06	1.96007	23.77	-0.73	2.4	4349.7	6158.5	7622.8
380	RAv17_04	5	N	1	1	4	1	1	1	2029	29	F	English	Y	cat, dog, horse, cow	6+ years	NA	Y	41	35		46	49	95	0.583333	0.393939	0.564103	5.12.17_01_02.10_av17_scrms_1st bout	5.8.17_03_27.15_av17_scrm	5.8.17_03_27.15_av17_scrm.wav	0.708	2733	3952	0.106	0.149718	2733.9	4758.4	2024.5	3876.8	385.59	95.8	9.3e-06	1.96007	23.77	-0.73	2.4	4349.7	6158.5	7622.8
381	RAv17_04	94	N	1	3	24	1	0	2	1137	20	F	English	N			NA	Y	45	44		40	44	84	0.72619	0.878788	0.410256	5.12.17_01_02.10_av17_scrms_1st bout	5.8.17_03_27.15_av17_scrm	5.8.17_03_27.15_av17_scrm.wav	0.708	2733	3952	0.106	0.149718	2733.9	4758.4	2024.5	3876.8	385.59	95.8	9.3e-06	1.96007	23.77	-0.73	2.4	4349.7	6158.5	7622.8
382	RAv17_04	82	N	1	1	6	1	0	2	1809	18	F	Korean	Y	dogs, cats	3	NA	Y	31	40		NA	NA	NA	0.559524	0.333333	0.641026	5.12.17_01_02.10_av17_scrms_1st bout	5.8.17_03_27.15_av17_scrm	5.8.17_03_27.15_av17_scrm.wav	0.708	2733	3952	0.106	0.149718	2733.9	4758.4	2024.5	3876.8	385.59	95.8	9.3e-06	1.96007	23.77	-0.73	2.4	4349.7	6158.5	7622.8
383	RAv17_04	62	N	1	1	20	1	0	2	880	18	F	English	Y	mice	1	NA	Y	59	32		46	40	86	0.559524	0.484848	0.538462	5.12.17_01_02.10_av17_scrms_1st bout	5.8.17_03_27.15_av17_scrm	5.8.17_03_27.15_av17_scrm.wav	0.708	2733	3952	0.106	0.149718	2733.9	4758.4	2024.5	3876.8	385.59	95.8	9.3e-06	1.96007	23.77	-0.73	2.4	4349.7	6158.5	7622.8
384	RAv17_04	92	N	1	3	22	1	0	2	16	18	F	English	N			NA	Y	45	30		36	36	72	0.595238	0.212121	0.589744	5.12.17_01_02.10_av17_scrms_1st bout	5.8.17_03_27.15_av17_scrm	5.8.17_03_27.15_av17_scrm.wav	0.708	2733	3952	0.106	0.149718	2733.9	4758.4	2024.5	3876.8	385.59	95.8	9.3e-06	1.96007	23.77	-0.73	2.4	4349.7	6158.5	7622.8
385	RAv17_04	14	N	1	4	12	1	0	2	578	19	M	English and Mandarin	N			NA	N	43	35		32	39	71	0.642857	0.818182	0.615385	5.12.17_01_02.10_av17_scrms_1st bout	5.8.17_03_27.15_av17_scrm	5.8.17_03_27.15_av17_scrm.wav	0.708	2733	3952	0.106	0.149718	2733.9	4758.4	2024.5	3876.8	385.59	95.8	9.3e-06	1.96007	23.77	-0.73	2.4	4349.7	6158.5	7622.8
386	RAv17_04	80	N	1	1	26	1	0	2	694	18	F	English	N			NA	Y	57	34		36	3	39	0.607143	0.545455	0.358974	5.12.17_01_02.10_av17_scrms_1st bout	5.8.17_03_27.15_av17_scrm	5.8.17_03_27.15_av17_scrm.wav	0.708	2733	3952	0.106	0.149718	2733.9	4758.4	2024.5	3876.8	385.59	95.8	9.3e-06	1.96007	23.77	-0.73	2.4	4349.7	6158.5	7622.8
387	RAv17_04	55	N	1	1	8	1	0	2	36	18	F	Mandarin	N			NA	Y	64	30		NA	NA	NA	0.690476	0.515152	0.410256	5.12.17_01_02.10_av17_scrms_1st bout	5.8.17_03_27.15_av17_scrm	5.8.17_03_27.15_av17_scrm.wav	0.708	2733	3952	0.106	0.149718	2733.9	4758.4	2024.5	3876.8	385.59	95.8	9.3e-06	1.96007	23.77	-0.73	2.4	4349.7	6158.5	7622.8
388	RAv17_04	109	N	1	2	7	1	0	2	205	20	F	English	N			NA	Y	41	33		45	43	88	0.666667	0.727273	0.384615	5.12.17_01_02.10_av17_scrms_1st bout	5.8.17_03_27.15_av17_scrm	5.8.17_03_27.15_av17_scrm.wav	0.708	2733	3952	0.106	0.149718	2733.9	4758.4	2024.5	3876.8	385.59	95.8	9.3e-06	1.96007	23.77	-0.73	2.4	4349.7	6158.5	7622.8
389	RAv17_04	74	N	1	3	20	1	0	2	4068	19	F	English	Y	cats, dogs	1	NA	Y	47	41		41	43	84	0.428571	0.272727	0.538462	5.12.17_01_02.10_av17_scrms_1st bout	5.8.17_03_27.15_av17_scrm	5.8.17_03_27.15_av17_scrm.wav	0.708	2733	3952	0.106	0.149718	2733.9	4758.4	2024.5	3876.8	385.59	95.8	9.3e-06	1.96007	23.77	-0.73	2.4	4349.7	6158.5	7622.8
390	RAv17_04	59	N	1	2	14	1	1	1	255	18	M	Gujarati	N			NA	N	37	38		NA	NA	NA	0.52381	0.393939	0.666667	5.12.17_01_02.10_av17_scrms_1st bout	5.8.17_03_27.15_av17_scrm	5.8.17_03_27.15_av17_scrm.wav	0.708	2733	3952	0.106	0.149718	2733.9	4758.4	2024.5	3876.8	385.59	95.8	9.3e-06	1.96007	23.77	-0.73	2.4	4349.7	6158.5	7622.8
391	RAv17_04	505	Y	1	3	23	1	1	1	1263	30	F	English	Y	Rhesus macaque, horses, dogs, cats, birds, mangabey	120	94	Y	NA	NA		NA	NA	NA	0.595238	1	0.589744	5.12.17_01_02.10_av17_scrms_1st bout	5.8.17_03_27.15_av17_scrm	5.8.17_03_27.15_av17_scrm.wav	0.708	2733	3952	0.106	0.149718	2733.9	4758.4	2024.5	3876.8	385.59	95.8	9.3e-06	1.96007	23.77	-0.73	2.4	4349.7	6158.5	7622.8
392	RAv17_04	58	N	1	2	9	1	0	2	263	21	F	Spanish	Y	mice, rats	2	NA	Y	53	33		NA	NA	NA	0.547619	0.515152	0.461538	5.12.17_01_02.10_av17_scrms_1st bout	5.8.17_03_27.15_av17_scrm	5.8.17_03_27.15_av17_scrm.wav	0.708	2733	3952	0.106	0.149718	2733.9	4758.4	2024.5	3876.8	385.59	95.8	9.3e-06	1.96007	23.77	-0.73	2.4	4349.7	6158.5	7622.8
393	RAv17_04	29	N	1	3	9	1	0	2	76	19	F	English	Y	dogs, cats	3	NA	Y	63	44		47	41	88	0.547619	0.454545	0.512821	5.12.17_01_02.10_av17_scrms_1st bout	5.8.17_03_27.15_av17_scrm	5.8.17_03_27.15_av17_scrm.wav	0.708	2733	3952	0.106	0.149718	2733.9	4758.4	2024.5	3876.8	385.59	95.8	9.3e-06	1.96007	23.77	-0.73	2.4	4349.7	6158.5	7622.8
394	RAv17_04	68	N	1	4	23	1	0	2	193	19	M	Spanish	N			NA	N	48	NA	didn't fill out this questionnaire animal	NA	NA	NA	0.607143	0.333333	0.641026	5.12.17_01_02.10_av17_scrms_1st bout	5.8.17_03_27.15_av17_scrm	5.8.17_03_27.15_av17_scrm.wav	0.708	2733	3952	0.106	0.149718	2733.9	4758.4	2024.5	3876.8	385.59	95.8	9.3e-06	1.96007	23.77	-0.73	2.4	4349.7	6158.5	7622.8
395	RAv17_04	510	Y	1	4	23	1	0	2	3127	30	M	English	Y	Rhesus macaque, Sooty mangabey	60	60	Y	NA	NA	asked for more clarification on "intense emotion" ~3 min into task	NA	NA	NA	0.511905	0.727273	0.717949	5.12.17_01_02.10_av17_scrms_1st bout	5.8.17_03_27.15_av17_scrm	5.8.17_03_27.15_av17_scrm.wav	0.708	2733	3952	0.106	0.149718	2733.9	4758.4	2024.5	3876.8	385.59	95.8	9.3e-06	1.96007	23.77	-0.73	2.4	4349.7	6158.5	7622.8
396	RAv17_04	12	N	1	1	27	1	0	2	301	21	M	Chinese	N			NA	Y	41	34		NA	NA	NA	0.642857	0.484848	0.410256	5.12.17_01_02.10_av17_scrms_1st bout	5.8.17_03_27.15_av17_scrm	5.8.17_03_27.15_av17_scrm.wav	0.708	2733	3952	0.106	0.149718	2733.9	4758.4	2024.5	3876.8	385.59	95.8	9.3e-06	1.96007	23.77	-0.73	2.4	4349.7	6158.5	7622.8
397	RAv17_04	17	N	1	4	24	1	0	2	649	19	F	Chinese	N			NA	Y	49	34		NA	NA	NA	0.595238	1	0.487179	5.12.17_01_02.10_av17_scrms_1st bout	5.8.17_03_27.15_av17_scrm	5.8.17_03_27.15_av17_scrm.wav	0.708	2733	3952	0.106	0.149718	2733.9	4758.4	2024.5	3876.8	385.59	95.8	9.3e-06	1.96007	23.77	-0.73	2.4	4349.7	6158.5	7622.8
398	RAv17_04	81	N	1	2	13	1	0	2	819	18	F	English	N			NA	Y	53	33		43	51	94	0.690476	0.454545	0.538462	5.12.17_01_02.10_av17_scrms_1st bout	5.8.17_03_27.15_av17_scrm	5.8.17_03_27.15_av17_scrm.wav	0.708	2733	3952	0.106	0.149718	2733.9	4758.4	2024.5	3876.8	385.59	95.8	9.3e-06	1.96007	23.77	-0.73	2.4	4349.7	6158.5	7622.8
399	RAv17_04	99	N	1	2	16	1	0	2	2443	19	F	English + Hindi	N			NA	Y	56	37		37	39	76	0.595238	0.30303	0.461538	5.12.17_01_02.10_av17_scrms_1st bout	5.8.17_03_27.15_av17_scrm	5.8.17_03_27.15_av17_scrm.wav	0.708	2733	3952	0.106	0.149718	2733.9	4758.4	2024.5	3876.8	385.59	95.8	9.3e-06	1.96007	23.77	-0.73	2.4	4349.7	6158.5	7622.8
400	RAv17_04	23	N	1	2	30	1	0	2	370	20	F	Mandarin	N			NA	N	38	33		NA	NA	NA	0.52381	0.575758	0.564103	5.12.17_01_02.10_av17_scrms_1st bout	5.8.17_03_27.15_av17_scrm	5.8.17_03_27.15_av17_scrm.wav	0.708	2733	3952	0.106	0.149718	2733.9	4758.4	2024.5	3876.8	385.59	95.8	9.3e-06	1.96007	23.77	-0.73	2.4	4349.7	6158.5	7622.8
401	RAv17_04	511	Y	1	4	10	1	0	2	197	24	F	English	Y	Rhesus macaque, domestic cats	24	24	Y	NA	NA		NA	NA	NA	0.571429	0.69697	0.512821	5.12.17_01_02.10_av17_scrms_1st bout	5.8.17_03_27.15_av17_scrm	5.8.17_03_27.15_av17_scrm.wav	0.708	2733	3952	0.106	0.149718	2733.9	4758.4	2024.5	3876.8	385.59	95.8	9.3e-06	1.96007	23.77	-0.73	2.4	4349.7	6158.5	7622.8
402	RAv17_04	48	N	1	3	36	1	0	2	5118	19	F	English	N			NA	Y	33	36		36	46	82	0.654762	0.606061	0.564103	5.12.17_01_02.10_av17_scrms_1st bout	5.8.17_03_27.15_av17_scrm	5.8.17_03_27.15_av17_scrm.wav	0.708	2733	3952	0.106	0.149718	2733.9	4758.4	2024.5	3876.8	385.59	95.8	9.3e-06	1.96007	23.77	-0.73	2.4	4349.7	6158.5	7622.8
403	RAv17_04	34	N	1	1	23	1	0	2	2666	24	M	Mandarin	N			NA	N	15	37		NA	NA	NA	0.511905	0.757576	0.282051	5.12.17_01_02.10_av17_scrms_1st bout	5.8.17_03_27.15_av17_scrm	5.8.17_03_27.15_av17_scrm.wav	0.708	2733	3952	0.106	0.149718	2733.9	4758.4	2024.5	3876.8	385.59	95.8	9.3e-06	1.96007	23.77	-0.73	2.4	4349.7	6158.5	7622.8
404	RAv17_04	512	Y	1	1	15	1	0	2	1688	39	M	English	Y	Rhesus macaque, pigtail macaque, common chimpanzee, west lowland gorilla, Sooty mangabey	144	144	Y	NA	NA	occasionally needed to answer radio during task	NA	NA	NA	0.642857	1	0.589744	5.12.17_01_02.10_av17_scrms_1st bout	5.8.17_03_27.15_av17_scrm	5.8.17_03_27.15_av17_scrm.wav	0.708	2733	3952	0.106	0.149718	2733.9	4758.4	2024.5	3876.8	385.59	95.8	9.3e-06	1.96007	23.77	-0.73	2.4	4349.7	6158.5	7622.8
405	RAv17_04	30	N	1	3	33	1	0	2	694	19	F	Chinese	N			NA	N	43	31		NA	NA	NA	0.535714	0.151515	0.641026	5.12.17_01_02.10_av17_scrms_1st bout	5.8.17_03_27.15_av17_scrm	5.8.17_03_27.15_av17_scrm.wav	0.708	2733	3952	0.106	0.149718	2733.9	4758.4	2024.5	3876.8	385.59	95.8	9.3e-06	1.96007	23.77	-0.73	2.4	4349.7	6158.5	7622.8
406	RAv17_04	96	N	1	4	19	1	0	2	281	18	F	English	N			NA	Y	59	39		44	47	91	0.583333	0.727273	0.512821	5.12.17_01_02.10_av17_scrms_1st bout	5.8.17_03_27.15_av17_scrm	5.8.17_03_27.15_av17_scrm.wav	0.708	2733	3952	0.106	0.149718	2733.9	4758.4	2024.5	3876.8	385.59	95.8	9.3e-06	1.96007	23.77	-0.73	2.4	4349.7	6158.5	7622.8
407	RAv17_04	86	N	1	3	16	1	0	2	259	22	M	Chinese	N			NA	Y	44	35		NA	NA	NA	0.666667	0.515152	0.641026	5.12.17_01_02.10_av17_scrms_1st bout	5.8.17_03_27.15_av17_scrm	5.8.17_03_27.15_av17_scrm.wav	0.708	2733	3952	0.106	0.149718	2733.9	4758.4	2024.5	3876.8	385.59	95.8	9.3e-06	1.96007	23.77	-0.73	2.4	4349.7	6158.5	7622.8
408	RAv17_04	61	N	1	3	25	1	0	2	4926	19	M	English	N			NA	Y	42	36		43	35	78	0.619048	0.424242	0.461538	5.12.17_01_02.10_av17_scrms_1st bout	5.8.17_03_27.15_av17_scrm	5.8.17_03_27.15_av17_scrm.wav	0.708	2733	3952	0.106	0.149718	2733.9	4758.4	2024.5	3876.8	385.59	95.8	9.3e-06	1.96007	23.77	-0.73	2.4	4349.7	6158.5	7622.8
409	RAv17_04	502	Y	1	4	22	1	0	2	912	39	F	English	Y	Rhesus, pigrails, gorillas, orangutans, lemurs	216	204	Y	63	30		45	43	88	0.642857	0.909091	0.666667	5.12.17_01_02.10_av17_scrms_1st bout	5.8.17_03_27.15_av17_scrm	5.8.17_03_27.15_av17_scrm.wav	0.708	2733	3952	0.106	0.149718	2733.9	4758.4	2024.5	3876.8	385.59	95.8	9.3e-06	1.96007	23.77	-0.73	2.4	4349.7	6158.5	7622.8
410	RAv17_04	2	N	1	1	20	1	0	2	3374	19	F	English	N			NA	Y	49	42		36	37	73	0.595238	0.0606061	0.641026	5.12.17_01_02.10_av17_scrms_1st bout	5.8.17_03_27.15_av17_scrm	5.8.17_03_27.15_av17_scrm.wav	0.708	2733	3952	0.106	0.149718	2733.9	4758.4	2024.5	3876.8	385.59	95.8	9.3e-06	1.96007	23.77	-0.73	2.4	4349.7	6158.5	7622.8
411	RAv17_04	41	N	1	2	11	1	0	2	286	20	M	Vietnamese	N			NA	Y	45	29		NA	NA	NA	0.630952	0.454545	0.435897	5.12.17_01_02.10_av17_scrms_1st bout	5.8.17_03_27.15_av17_scrm	5.8.17_03_27.15_av17_scrm.wav	0.708	2733	3952	0.106	0.149718	2733.9	4758.4	2024.5	3876.8	385.59	95.8	9.3e-06	1.96007	23.77	-0.73	2.4	4349.7	6158.5	7622.8
412	RAv17_04	33	N	1	3	1	1	0	2	271	19	F	Mandarin + English	N			NA	Y	56	33		NA	NA	NA	0.571429	0.272727	0.615385	5.12.17_01_02.10_av17_scrms_1st bout	5.8.17_03_27.15_av17_scrm	5.8.17_03_27.15_av17_scrm.wav	0.708	2733	3952	0.106	0.149718	2733.9	4758.4	2024.5	3876.8	385.59	95.8	9.3e-06	1.96007	23.77	-0.73	2.4	4349.7	6158.5	7622.8
413	RAv17_04	40	N	1	1	10	1	0	2	303	19	F	Chinese	N			NA	N	39	39		NA	NA	NA	0.666667	0.515152	0.512821	5.12.17_01_02.10_av17_scrms_1st bout	5.8.17_03_27.15_av17_scrm	5.8.17_03_27.15_av17_scrm.wav	0.708	2733	3952	0.106	0.149718	2733.9	4758.4	2024.5	3876.8	385.59	95.8	9.3e-06	1.96007	23.77	-0.73	2.4	4349.7	6158.5	7622.8
414	RAv17_04	73	N	1	2	6	1	0	2	454	19	F	English and Chinese	N			NA	Y	41	37		34	36	70	0.571429	0.575758	0.538462	5.12.17_01_02.10_av17_scrms_1st bout	5.8.17_03_27.15_av17_scrm	5.8.17_03_27.15_av17_scrm.wav	0.708	2733	3952	0.106	0.149718	2733.9	4758.4	2024.5	3876.8	385.59	95.8	9.3e-06	1.96007	23.77	-0.73	2.4	4349.7	6158.5	7622.8
415	RAv17_04	31	N	1	2	25	1	0	2	568	18	F	English	N			NA	Y	47	35		38	40	78	0.583333	0.575758	0.384615	5.12.17_01_02.10_av17_scrms_1st bout	5.8.17_03_27.15_av17_scrm	5.8.17_03_27.15_av17_scrm.wav	0.708	2733	3952	0.106	0.149718	2733.9	4758.4	2024.5	3876.8	385.59	95.8	9.3e-06	1.96007	23.77	-0.73	2.4	4349.7	6158.5	7622.8
416	RAv17_04	51	N	1	3	23	1	0	2	312	18	F	English	N			NA	Y	31	36		45	44	89	0.654762	0.515152	0.615385	5.12.17_01_02.10_av17_scrms_1st bout	5.8.17_03_27.15_av17_scrm	5.8.17_03_27.15_av17_scrm.wav	0.708	2733	3952	0.106	0.149718	2733.9	4758.4	2024.5	3876.8	385.59	95.8	9.3e-06	1.96007	23.77	-0.73	2.4	4349.7	6158.5	7622.8
417	RAv17_04	115	N	1	1	38	1	0	2	1980	18	M	Mandarin	N			NA	N	31	37		NA	NA	NA	0.583333	0.575758	0.461538	5.12.17_01_02.10_av17_scrms_1st bout	5.8.17_03_27.15_av17_scrm	5.8.17_03_27.15_av17_scrm.wav	0.708	2733	3952	0.106	0.149718	2733.9	4758.4	2024.5	3876.8	385.59	95.8	9.3e-06	1.96007	23.77	-0.73	2.4	4349.7	6158.5	7622.8
418	RAv17_04	8	N	1	3	28	1	0	2	1433	19	F	English	Y	dogs, cats	24	NA	Y	58	40		39	43	82	0.595238	0.363636	0.589744	5.12.17_01_02.10_av17_scrms_1st bout	5.8.17_03_27.15_av17_scrm	5.8.17_03_27.15_av17_scrm.wav	0.708	2733	3952	0.106	0.149718	2733.9	4758.4	2024.5	3876.8	385.59	95.8	9.3e-06	1.96007	23.77	-0.73	2.4	4349.7	6158.5	7622.8
419	RAv17_04	67	N	1	4	6	1	0	2	3020	18	F	English	N			NA	N	29	44		32	32	64	0.75	0.636364	0.564103	5.12.17_01_02.10_av17_scrms_1st bout	5.8.17_03_27.15_av17_scrm	5.8.17_03_27.15_av17_scrm.wav	0.708	2733	3952	0.106	0.149718	2733.9	4758.4	2024.5	3876.8	385.59	95.8	9.3e-06	1.96007	23.77	-0.73	2.4	4349.7	6158.5	7622.8
420	RAv17_04	36	N	1	2	13	1	0	2	402	19	F	English	Y	dogs, cats	4	NA	Y	53	31		42	42	84	0.416667	0.606061	0.435897	5.12.17_01_02.10_av17_scrms_1st bout	5.8.17_03_27.15_av17_scrm	5.8.17_03_27.15_av17_scrm.wav	0.708	2733	3952	0.106	0.149718	2733.9	4758.4	2024.5	3876.8	385.59	95.8	9.3e-06	1.96007	23.77	-0.73	2.4	4349.7	6158.5	7622.8
421	RAv17_04	4	N	1	2	21	1	0	2	232	20	M	English	N			NA	N	43	38		27	24	51	0.559524	0.424242	0.589744	5.12.17_01_02.10_av17_scrms_1st bout	5.8.17_03_27.15_av17_scrm	5.8.17_03_27.15_av17_scrm.wav	0.708	2733	3952	0.106	0.149718	2733.9	4758.4	2024.5	3876.8	385.59	95.8	9.3e-06	1.96007	23.77	-0.73	2.4	4349.7	6158.5	7622.8
422	RAv17_04	102	N	1	3	10	1	1	1	252	18	F	English	Y	elephants, dogs, tortoises	3	NA	Y	46	44		33	36	69	0.559524	0.424242	0.461538	5.12.17_01_02.10_av17_scrms_1st bout	5.8.17_03_27.15_av17_scrm	5.8.17_03_27.15_av17_scrm.wav	0.708	2733	3952	0.106	0.149718	2733.9	4758.4	2024.5	3876.8	385.59	95.8	9.3e-06	1.96007	23.77	-0.73	2.4	4349.7	6158.5	7622.8
423	RAv17_04	110	N	1	4	29	1	0	2	337	19	M	English	N			NA	Y	40	32		35	38	73	0.511905	0.69697	0.564103	5.12.17_01_02.10_av17_scrms_1st bout	5.8.17_03_27.15_av17_scrm	5.8.17_03_27.15_av17_scrm.wav	0.708	2733	3952	0.106	0.149718	2733.9	4758.4	2024.5	3876.8	385.59	95.8	9.3e-06	1.96007	23.77	-0.73	2.4	4349.7	6158.5	7622.8
424	RAv17_04	64	N	1	2	24	1	0	2	6741	18	F	English	N			NA	N	55	36		40	42	82	0.654762	0.393939	0.666667	5.12.17_01_02.10_av17_scrms_1st bout	5.8.17_03_27.15_av17_scrm	5.8.17_03_27.15_av17_scrm.wav	0.708	2733	3952	0.106	0.149718	2733.9	4758.4	2024.5	3876.8	385.59	95.8	9.3e-06	1.96007	23.77	-0.73	2.4	4349.7	6158.5	7622.8
425	RAv17_04	69	N	1	1	13	1	0	2	325	20	F	English	N			NA	Y	40	37		42	43	85	0.547619	0.424242	0.615385	5.12.17_01_02.10_av17_scrms_1st bout	5.8.17_03_27.15_av17_scrm	5.8.17_03_27.15_av17_scrm.wav	0.708	2733	3952	0.106	0.149718	2733.9	4758.4	2024.5	3876.8	385.59	95.8	9.3e-06	1.96007	23.77	-0.73	2.4	4349.7	6158.5	7622.8
426	RAv17_04	13	N	1	3	11	1	0	2	523	19	F	English	N			NA	N	21	34		42	41	83	0.5	0.666667	0.487179	5.12.17_01_02.10_av17_scrms_1st bout	5.8.17_03_27.15_av17_scrm	5.8.17_03_27.15_av17_scrm.wav	0.708	2733	3952	0.106	0.149718	2733.9	4758.4	2024.5	3876.8	385.59	95.8	9.3e-06	1.96007	23.77	-0.73	2.4	4349.7	6158.5	7622.8
427	RAv17_04	84	N	1	1	32	1	0	2	47	19	F	English	N			NA	Y	34	36		35	37	72	0.547619	0.575758	0.512821	5.12.17_01_02.10_av17_scrms_1st bout	5.8.17_03_27.15_av17_scrm	5.8.17_03_27.15_av17_scrm.wav	0.708	2733	3952	0.106	0.149718	2733.9	4758.4	2024.5	3876.8	385.59	95.8	9.3e-06	1.96007	23.77	-0.73	2.4	4349.7	6158.5	7622.8
428	RAv17_04	18	N	1	1	17	1	0	2	457	20	F	English	N			NA	Y	44	35		32	42	74	0.571429	0.151515	0.333333	5.12.17_01_02.10_av17_scrms_1st bout	5.8.17_03_27.15_av17_scrm	5.8.17_03_27.15_av17_scrm.wav	0.708	2733	3952	0.106	0.149718	2733.9	4758.4	2024.5	3876.8	385.59	95.8	9.3e-06	1.96007	23.77	-0.73	2.4	4349.7	6158.5	7622.8
429	RAv17_04	49	N	1	3	34	1	0	2	295	18	F	English	N			NA	N	44	28		42	2	44	0.642857	0.454545	0.487179	5.12.17_01_02.10_av17_scrms_1st bout	5.8.17_03_27.15_av17_scrm	5.8.17_03_27.15_av17_scrm.wav	0.708	2733	3952	0.106	0.149718	2733.9	4758.4	2024.5	3876.8	385.59	95.8	9.3e-06	1.96007	23.77	-0.73	2.4	4349.7	6158.5	7622.8
430	RAv17_04	11	N	1	2	34	1	0	2	4236	20	F	English (mainly) + Hindi	Y	dogs	6	NA	Y	66	45	noted w/ regard to coos that it is upsetting - sounds like they're in pain. Noted surpirse that screams would be more intense context than coos	34	41	75	0.666667	0.545455	0.641026	5.12.17_01_02.10_av17_scrms_1st bout	5.8.17_03_27.15_av17_scrm	5.8.17_03_27.15_av17_scrm.wav	0.708	2733	3952	0.106	0.149718	2733.9	4758.4	2024.5	3876.8	385.59	95.8	9.3e-06	1.96007	23.77	-0.73	2.4	4349.7	6158.5	7622.8
431	RAv17_04	42	N	1	1	11	1	0	2	2049	19	F	English	N			NA	N	35	28		44	44	88	0.571429	0.454545	0.692308	5.12.17_01_02.10_av17_scrms_1st bout	5.8.17_03_27.15_av17_scrm	5.8.17_03_27.15_av17_scrm.wav	0.708	2733	3952	0.106	0.149718	2733.9	4758.4	2024.5	3876.8	385.59	95.8	9.3e-06	1.96007	23.77	-0.73	2.4	4349.7	6158.5	7622.8
432	RAv17_04	22	N	1	4	7	1	1	1	962	31	F	English	Y	dogs, cats	6	NA	Y	56	49		47	46	93	0.452381	0.515152	0.692308	5.12.17_01_02.10_av17_scrms_1st bout	5.8.17_03_27.15_av17_scrm	5.8.17_03_27.15_av17_scrm.wav	0.708	2733	3952	0.106	0.149718	2733.9	4758.4	2024.5	3876.8	385.59	95.8	9.3e-06	1.96007	23.77	-0.73	2.4	4349.7	6158.5	7622.8
433	RAv17_04	90	N	1	4	10	1	0	2	567	21	M	English	N			NA	N	43	24		42	42	84	0.52381	0.69697	0.641026	5.12.17_01_02.10_av17_scrms_1st bout	5.8.17_03_27.15_av17_scrm	5.8.17_03_27.15_av17_scrm.wav	0.708	2733	3952	0.106	0.149718	2733.9	4758.4	2024.5	3876.8	385.59	95.8	9.3e-06	1.96007	23.77	-0.73	2.4	4349.7	6158.5	7622.8
434	RAv17_04	7	N	1	4	19	1	1	1	520	21	F	English	N			NA	Y	49	33		44	43	87	0.583333	0.363636	0.615385	5.12.17_01_02.10_av17_scrms_1st bout	5.8.17_03_27.15_av17_scrm	5.8.17_03_27.15_av17_scrm.wav	0.708	2733	3952	0.106	0.149718	2733.9	4758.4	2024.5	3876.8	385.59	95.8	9.3e-06	1.96007	23.77	-0.73	2.4	4349.7	6158.5	7622.8
435	RAv17_04	506	Y	1	3	13	1	0	2	300	37	F	English	Y	Rhesus macaque	120	120	Y	NA	NA		NA	NA	NA	0.559524	0.424242	0.487179	5.12.17_01_02.10_av17_scrms_1st bout	5.8.17_03_27.15_av17_scrm	5.8.17_03_27.15_av17_scrm.wav	0.708	2733	3952	0.106	0.149718	2733.9	4758.4	2024.5	3876.8	385.59	95.8	9.3e-06	1.96007	23.77	-0.73	2.4	4349.7	6158.5	7622.8
436	RAv17_04	44	N	1	4	34	1	0	2	303	31	F	English	N			NA	Y	39	34		47	45	92	0.571429	0.606061	0.333333	5.12.17_01_02.10_av17_scrms_1st bout	5.8.17_03_27.15_av17_scrm	5.8.17_03_27.15_av17_scrm.wav	0.708	2733	3952	0.106	0.149718	2733.9	4758.4	2024.5	3876.8	385.59	95.8	9.3e-06	1.96007	23.77	-0.73	2.4	4349.7	6158.5	7622.8
437	RAv17_04	15	N	1	2	8	1	0	2	589	20	F	English and Chinese	N			NA	Y	58	36	didn't make it to face - just voice	NA	36	NA	0.488095	0.393939	0.461538	5.12.17_01_02.10_av17_scrms_1st bout	5.8.17_03_27.15_av17_scrm	5.8.17_03_27.15_av17_scrm.wav	0.708	2733	3952	0.106	0.149718	2733.9	4758.4	2024.5	3876.8	385.59	95.8	9.3e-06	1.96007	23.77	-0.73	2.4	4349.7	6158.5	7622.8
438	RAv17_04	39	N	1	4	33	1	1	1	358	19	F	Spanish/English	N			NA	Y	55	38		41	43	84	0.583333	0.454545	0.538462	5.12.17_01_02.10_av17_scrms_1st bout	5.8.17_03_27.15_av17_scrm	5.8.17_03_27.15_av17_scrm.wav	0.708	2733	3952	0.106	0.149718	2733.9	4758.4	2024.5	3876.8	385.59	95.8	9.3e-06	1.96007	23.77	-0.73	2.4	4349.7	6158.5	7622.8
439	RAv17_04	87	N	1	1	21	1	0	2	426	19	F	Korean	N			NA	Y	53	41		NA	NA	NA	0.654762	0.787879	0.615385	5.12.17_01_02.10_av17_scrms_1st bout	5.8.17_03_27.15_av17_scrm	5.8.17_03_27.15_av17_scrm.wav	0.708	2733	3952	0.106	0.149718	2733.9	4758.4	2024.5	3876.8	385.59	95.8	9.3e-06	1.96007	23.77	-0.73	2.4	4349.7	6158.5	7622.8
440	RAv17_04	113	N	1	1	21	1	0	2	613	18	F	English	N			NA	Y	52	38		47	41	88	0.583333	0.848485	0.564103	5.12.17_01_02.10_av17_scrms_1st bout	5.8.17_03_27.15_av17_scrm	5.8.17_03_27.15_av17_scrm.wav	0.708	2733	3952	0.106	0.149718	2733.9	4758.4	2024.5	3876.8	385.59	95.8	9.3e-06	1.96007	23.77	-0.73	2.4	4349.7	6158.5	7622.8
441	RAv17_04	43	N	1	1	30	1	0	2	170	19	M	English	N			NA	Y	37	39		36	40	76	0.595238	0.666667	0.589744	5.12.17_01_02.10_av17_scrms_1st bout	5.8.17_03_27.15_av17_scrm	5.8.17_03_27.15_av17_scrm.wav	0.708	2733	3952	0.106	0.149718	2733.9	4758.4	2024.5	3876.8	385.59	95.8	9.3e-06	1.96007	23.77	-0.73	2.4	4349.7	6158.5	7622.8
442	RAv17_04	63	N	1	3	28	1	1	1	179	19	F	English	N			NA	N	60	40		44	42	86	0.535714	0	0.717949	5.12.17_01_02.10_av17_scrms_1st bout	5.8.17_03_27.15_av17_scrm	5.8.17_03_27.15_av17_scrm.wav	0.708	2733	3952	0.106	0.149718	2733.9	4758.4	2024.5	3876.8	385.59	95.8	9.3e-06	1.96007	23.77	-0.73	2.4	4349.7	6158.5	7622.8
443	RAv17_04	26	N	1	4	28	1	0	2	251	24	M	Telugu	N			NA	N	41	35		NA	NA	NA	0.607143	0.515152	0.538462	5.12.17_01_02.10_av17_scrms_1st bout	5.8.17_03_27.15_av17_scrm	5.8.17_03_27.15_av17_scrm.wav	0.708	2733	3952	0.106	0.149718	2733.9	4758.4	2024.5	3876.8	385.59	95.8	9.3e-06	1.96007	23.77	-0.73	2.4	4349.7	6158.5	7622.8
444	RAv17_04	88	N	1	2	21	1	0	2	19	19	M	Mandarin	N			NA	Y	49	27		NA	NA	NA	0.547619	0.818182	0.538462	5.12.17_01_02.10_av17_scrms_1st bout	5.8.17_03_27.15_av17_scrm	5.8.17_03_27.15_av17_scrm.wav	0.708	2733	3952	0.106	0.149718	2733.9	4758.4	2024.5	3876.8	385.59	95.8	9.3e-06	1.96007	23.77	-0.73	2.4	4349.7	6158.5	7622.8
445	RAv17_04	78	N	1	1	22	1	0	2	1141	20	M	Spanish	Y	dogs, snakes	2	NA	Y	45	35		NA	NA	NA	0.547619	0.424242	0.487179	5.12.17_01_02.10_av17_scrms_1st bout	5.8.17_03_27.15_av17_scrm	5.8.17_03_27.15_av17_scrm.wav	0.708	2733	3952	0.106	0.149718	2733.9	4758.4	2024.5	3876.8	385.59	95.8	9.3e-06	1.96007	23.77	-0.73	2.4	4349.7	6158.5	7622.8
446	RAv17_04	101	N	1	1	23	1	0	2	257	19	F	English	Y	mice	11	NA	Y	50	40		43	43	86	0.690476	0.484848	0.487179	5.12.17_01_02.10_av17_scrms_1st bout	5.8.17_03_27.15_av17_scrm	5.8.17_03_27.15_av17_scrm.wav	0.708	2733	3952	0.106	0.149718	2733.9	4758.4	2024.5	3876.8	385.59	95.8	9.3e-06	1.96007	23.77	-0.73	2.4	4349.7	6158.5	7622.8
447	RAv17_04	105	N	1	4	30	1	0	2	1062	19	F	English	N			NA	Y	44	36		40	42	82	0.571429	0.606061	0.435897	5.12.17_01_02.10_av17_scrms_1st bout	5.8.17_03_27.15_av17_scrm	5.8.17_03_27.15_av17_scrm.wav	0.708	2733	3952	0.106	0.149718	2733.9	4758.4	2024.5	3876.8	385.59	95.8	9.3e-06	1.96007	23.77	-0.73	2.4	4349.7	6158.5	7622.8
448	RAv17_04	52	N	1	3	5	1	0	2	60	19	F	English	N			NA	Y	55	38		42	43	85	0.619048	0.393939	0.512821	5.12.17_01_02.10_av17_scrms_1st bout	5.8.17_03_27.15_av17_scrm	5.8.17_03_27.15_av17_scrm.wav	0.708	2733	3952	0.106	0.149718	2733.9	4758.4	2024.5	3876.8	385.59	95.8	9.3e-06	1.96007	23.77	-0.73	2.4	4349.7	6158.5	7622.8
449	RAv17_04	60	N	1	1	31	1	0	2	278	18	F	Chinese	N			NA	Y	54	33		NA	NA	NA	0.595238	0.69697	0.615385	5.12.17_01_02.10_av17_scrms_1st bout	5.8.17_03_27.15_av17_scrm	5.8.17_03_27.15_av17_scrm.wav	0.708	2733	3952	0.106	0.149718	2733.9	4758.4	2024.5	3876.8	385.59	95.8	9.3e-06	1.96007	23.77	-0.73	2.4	4349.7	6158.5	7622.8
450	RAv17_04	112	N	1	3	1	1	0	2	858	18	M	Turkish	N			NA	Y	55	40		NA	NA	NA	0.535714	0.424242	0.461538	5.12.17_01_02.10_av17_scrms_1st bout	5.8.17_03_27.15_av17_scrm	5.8.17_03_27.15_av17_scrm.wav	0.708	2733	3952	0.106	0.149718	2733.9	4758.4	2024.5	3876.8	385.59	95.8	9.3e-06	1.96007	23.77	-0.73	2.4	4349.7	6158.5	7622.8
451	RAv17_04	107	N	1	2	24	1	0	2	1639	22	F	Chinese	N			NA	N	21	37		NA	NA	NA	0.595238	0.424242	0.435897	5.12.17_01_02.10_av17_scrms_1st bout	5.8.17_03_27.15_av17_scrm	5.8.17_03_27.15_av17_scrm.wav	0.708	2733	3952	0.106	0.149718	2733.9	4758.4	2024.5	3876.8	385.59	95.8	9.3e-06	1.96007	23.77	-0.73	2.4	4349.7	6158.5	7622.8
452	RAv17_04	104	N	1	2	19	1	0	2	59	19	F	Bangla	N			NA	N	49	31		NA	NA	NA	0.619048	0.363636	0.384615	5.12.17_01_02.10_av17_scrms_1st bout	5.8.17_03_27.15_av17_scrm	5.8.17_03_27.15_av17_scrm.wav	0.708	2733	3952	0.106	0.149718	2733.9	4758.4	2024.5	3876.8	385.59	95.8	9.3e-06	1.96007	23.77	-0.73	2.4	4349.7	6158.5	7622.8
453	RAv17_04	65	N	1	4	5	1	0	2	436	20	F	Arabic	Y			NA	N	36	35		NA	NA	NA	0.559524	0.363636	0.564103	5.12.17_01_02.10_av17_scrms_1st bout	5.8.17_03_27.15_av17_scrm	5.8.17_03_27.15_av17_scrm.wav	0.708	2733	3952	0.106	0.149718	2733.9	4758.4	2024.5	3876.8	385.59	95.8	9.3e-06	1.96007	23.77	-0.73	2.4	4349.7	6158.5	7622.8
454	RAv17_04	509	Y	1	2	34	1	1	1	320	28	M	Spanish/English	Y	Rhesus macaque, mangabey	48	48	Y	NA	NA		NA	NA	NA	0.464286	0.969697	0.615385	5.12.17_01_02.10_av17_scrms_1st bout	5.8.17_03_27.15_av17_scrm	5.8.17_03_27.15_av17_scrm.wav	0.708	2733	3952	0.106	0.149718	2733.9	4758.4	2024.5	3876.8	385.59	95.8	9.3e-06	1.96007	23.77	-0.73	2.4	4349.7	6158.5	7622.8
455	RAv17_04	24	N	1	4	22	1	0	2	562	20	M	English	N			NA	N	41	24		35	36	71	0.404762	0.363636	0.666667	5.12.17_01_02.10_av17_scrms_1st bout	5.8.17_03_27.15_av17_scrm	5.8.17_03_27.15_av17_scrm.wav	0.708	2733	3952	0.106	0.149718	2733.9	4758.4	2024.5	3876.8	385.59	95.8	9.3e-06	1.96007	23.77	-0.73	2.4	4349.7	6158.5	7622.8
456	RAv17_04	103	N	1	1	32	1	0	2	500	19	F	Korean + English	Y	dogs, cats	3	NA	Y	47	39		40	41	81	0.52381	0.393939	0.512821	5.12.17_01_02.10_av17_scrms_1st bout	5.8.17_03_27.15_av17_scrm	5.8.17_03_27.15_av17_scrm.wav	0.708	2733	3952	0.106	0.149718	2733.9	4758.4	2024.5	3876.8	385.59	95.8	9.3e-06	1.96007	23.77	-0.73	2.4	4349.7	6158.5	7622.8
457	RAv17_04	35	N	1	4	39	1	0	2	787	19	M	English	N			NA	N	40	21		44	39	83	0.666667	0.818182	0.641026	5.12.17_01_02.10_av17_scrms_1st bout	5.8.17_03_27.15_av17_scrm	5.8.17_03_27.15_av17_scrm.wav	0.708	2733	3952	0.106	0.149718	2733.9	4758.4	2024.5	3876.8	385.59	95.8	9.3e-06	1.96007	23.77	-0.73	2.4	4349.7	6158.5	7622.8
458	RAv17_04	57	N	1	2	15	1	0	2	188	20	F	English	N			NA	N	29	31		27	41	68	0.547619	0.333333	0.538462	5.12.17_01_02.10_av17_scrms_1st bout	5.8.17_03_27.15_av17_scrm	5.8.17_03_27.15_av17_scrm.wav	0.708	2733	3952	0.106	0.149718	2733.9	4758.4	2024.5	3876.8	385.59	95.8	9.3e-06	1.96007	23.77	-0.73	2.4	4349.7	6158.5	7622.8
459	RAv17_04	27	N	1	1	26	1	1	1	2918	23	F	Telugu	N			NA	N	32	44		NA	NA	NA	0.547619	0.151515	0.512821	5.12.17_01_02.10_av17_scrms_1st bout	5.8.17_03_27.15_av17_scrm	5.8.17_03_27.15_av17_scrm.wav	0.708	2733	3952	0.106	0.149718	2733.9	4758.4	2024.5	3876.8	385.59	95.8	9.3e-06	1.96007	23.77	-0.73	2.4	4349.7	6158.5	7622.8
460	RAv17_04	46	N	1	1	23	1	1	1	14	18	F	English	N			NA	Y	45	25		39	42	81	0.619048	0.515152	0.589744	5.12.17_01_02.10_av17_scrms_1st bout	5.8.17_03_27.15_av17_scrm	5.8.17_03_27.15_av17_scrm.wav	0.708	2733	3952	0.106	0.149718	2733.9	4758.4	2024.5	3876.8	385.59	95.8	9.3e-06	1.96007	23.77	-0.73	2.4	4349.7	6158.5	7622.8
461	RAv17_04	71	N	1	1	18	1	1	1	867	19	M	English	N			NA	Y	44	36		43	43	86	0.595238	0.424242	0.333333	5.12.17_01_02.10_av17_scrms_1st bout	5.8.17_03_27.15_av17_scrm	5.8.17_03_27.15_av17_scrm.wav	0.708	2733	3952	0.106	0.149718	2733.9	4758.4	2024.5	3876.8	385.59	95.8	9.3e-06	1.96007	23.77	-0.73	2.4	4349.7	6158.5	7622.8
462	RAv17_04	83	N	1	4	37	1	0	2	149	19	F	English	N			NA	Y	55	46		48	46	94	0.5	0.333333	0.487179	5.12.17_01_02.10_av17_scrms_1st bout	5.8.17_03_27.15_av17_scrm	5.8.17_03_27.15_av17_scrm.wav	0.708	2733	3952	0.106	0.149718	2733.9	4758.4	2024.5	3876.8	385.59	95.8	9.3e-06	1.96007	23.77	-0.73	2.4	4349.7	6158.5	7622.8
463	RAv17_04	114	N	1	3	36	1	1	1	3734	19	M	English	N			NA	Y	58	35		36	38	74	0.607143	0.393939	0.512821	5.12.17_01_02.10_av17_scrms_1st bout	5.8.17_03_27.15_av17_scrm	5.8.17_03_27.15_av17_scrm.wav	0.708	2733	3952	0.106	0.149718	2733.9	4758.4	2024.5	3876.8	385.59	95.8	9.3e-06	1.96007	23.77	-0.73	2.4	4349.7	6158.5	7622.8
464	RAv17_04	70	N	1	1	30	1	0	2	1126	18	F	English	N			NA	Y	62	34		48	45	93	0.52381	0.242424	0.384615	5.12.17_01_02.10_av17_scrms_1st bout	5.8.17_03_27.15_av17_scrm	5.8.17_03_27.15_av17_scrm.wav	0.708	2733	3952	0.106	0.149718	2733.9	4758.4	2024.5	3876.8	385.59	95.8	9.3e-06	1.96007	23.77	-0.73	2.4	4349.7	6158.5	7622.8
465	RAv17_04	95	N	1	1	28	1	0	2	422	20	F	English	N			NA	Y	57	30		39	44	83	0.571429	0.363636	0.564103	5.12.17_01_02.10_av17_scrms_1st bout	5.8.17_03_27.15_av17_scrm	5.8.17_03_27.15_av17_scrm.wav	0.708	2733	3952	0.106	0.149718	2733.9	4758.4	2024.5	3876.8	385.59	95.8	9.3e-06	1.96007	23.77	-0.73	2.4	4349.7	6158.5	7622.8
466	RAv17_04	76	N	1	2	3	1	0	2	1320	19	F	Chinese	N			NA	Y	41	41		NA	NA	NA	0.630952	0.393939	0.538462	5.12.17_01_02.10_av17_scrms_1st bout	5.8.17_03_27.15_av17_scrm	5.8.17_03_27.15_av17_scrm.wav	0.708	2733	3952	0.106	0.149718	2733.9	4758.4	2024.5	3876.8	385.59	95.8	9.3e-06	1.96007	23.77	-0.73	2.4	4349.7	6158.5	7622.8
467	RAv17_04	111	N	1	2	1	1	1	1	680	21	F	English	N			NA	N	39	39		40	36	76	0.511905	0.575758	0.512821	5.12.17_01_02.10_av17_scrms_1st bout	5.8.17_03_27.15_av17_scrm	5.8.17_03_27.15_av17_scrm.wav	0.708	2733	3952	0.106	0.149718	2733.9	4758.4	2024.5	3876.8	385.59	95.8	9.3e-06	1.96007	23.77	-0.73	2.4	4349.7	6158.5	7622.8
468	RAv17_04	501	Y	1	1	15	1	0	2	289	26	M	English	Y	lemurs (black white ruffed, ringtail, red bellied, crown, mongoose), Rhesus monkeys, gorillas, orangutans	Lemur: 24, Rh: 48, Gorilla: 12, Orangutan: 12	48	Y	47	37		46	44	90	0.559524	0.69697	0.461538	5.12.17_01_02.10_av17_scrms_1st bout	5.8.17_03_27.15_av17_scrm	5.8.17_03_27.15_av17_scrm.wav	0.708	2733	3952	0.106	0.149718	2733.9	4758.4	2024.5	3876.8	385.59	95.8	9.3e-06	1.96007	23.77	-0.73	2.4	4349.7	6158.5	7622.8
469	RAv17_04	32	N	1	3	37	1	1	1	2397	23	F	English	N			NA	N	58	26		34	33	67	0.559524	0.424242	0.435897	5.12.17_01_02.10_av17_scrms_1st bout	5.8.17_03_27.15_av17_scrm	5.8.17_03_27.15_av17_scrm.wav	0.708	2733	3952	0.106	0.149718	2733.9	4758.4	2024.5	3876.8	385.59	95.8	9.3e-06	1.96007	23.77	-0.73	2.4	4349.7	6158.5	7622.8
470	RAv17_04	6	N	1	2	12	1	0	2	275	23	M	English	Y	mice	3	NA	Y	31	28		38	41	79	0.595238	0.484848	0.589744	5.12.17_01_02.10_av17_scrms_1st bout	5.8.17_03_27.15_av17_scrm	5.8.17_03_27.15_av17_scrm.wav	0.708	2733	3952	0.106	0.149718	2733.9	4758.4	2024.5	3876.8	385.59	95.8	9.3e-06	1.96007	23.77	-0.73	2.4	4349.7	6158.5	7622.8
471	RAv17_04	16	N	1	2	19	1	0	2	2319	21	F	English	Y	dogs, cats	6	NA	Y	44	43		38	40	78	0.559524	0.545455	0.461538	5.12.17_01_02.10_av17_scrms_1st bout	5.8.17_03_27.15_av17_scrm	5.8.17_03_27.15_av17_scrm.wav	0.708	2733	3952	0.106	0.149718	2733.9	4758.4	2024.5	3876.8	385.59	95.8	9.3e-06	1.96007	23.77	-0.73	2.4	4349.7	6158.5	7622.8
472	RAv17_04	89	N	1	2	7	1	0	2	344	18	F	Spanish	N			NA	Y	50	37		NA	NA	NA	0.619048	0.818182	0.589744	5.12.17_01_02.10_av17_scrms_1st bout	5.8.17_03_27.15_av17_scrm	5.8.17_03_27.15_av17_scrm.wav	0.708	2733	3952	0.106	0.149718	2733.9	4758.4	2024.5	3876.8	385.59	95.8	9.3e-06	1.96007	23.77	-0.73	2.4	4349.7	6158.5	7622.8
473	RAv17_04	21	N	1	2	27	1	0	2	211	20	F	English	Y	dogs	6	NA	Y	44	37		41	34	75	0.630952	0.787879	0.384615	5.12.17_01_02.10_av17_scrms_1st bout	5.8.17_03_27.15_av17_scrm	5.8.17_03_27.15_av17_scrm.wav	0.708	2733	3952	0.106	0.149718	2733.9	4758.4	2024.5	3876.8	385.59	95.8	9.3e-06	1.96007	23.77	-0.73	2.4	4349.7	6158.5	7622.8
474	RAv17_04	79	N	1	2	28	1	0	2	208	21	M	English	N			NA	Y	55	38		33	34	67	0.571429	0.393939	0.564103	5.12.17_01_02.10_av17_scrms_1st bout	5.8.17_03_27.15_av17_scrm	5.8.17_03_27.15_av17_scrm.wav	0.708	2733	3952	0.106	0.149718	2733.9	4758.4	2024.5	3876.8	385.59	95.8	9.3e-06	1.96007	23.77	-0.73	2.4	4349.7	6158.5	7622.8
475	RAv17_04	85	N	1	2	29	1	0	2	495	19	F	Chinese	N			NA	Y	25	32		NA	NA	NA	0.571429	0.363636	0.435897	5.12.17_01_02.10_av17_scrms_1st bout	5.8.17_03_27.15_av17_scrm	5.8.17_03_27.15_av17_scrm.wav	0.708	2733	3952	0.106	0.149718	2733.9	4758.4	2024.5	3876.8	385.59	95.8	9.3e-06	1.96007	23.77	-0.73	2.4	4349.7	6158.5	7622.8
476	RAv17_04	66	N	1	1	33	1	0	2	1245	20	M	Chinese	N			NA	N	41	38		NA	NA	NA	0.47619	0.69697	0.512821	5.12.17_01_02.10_av17_scrms_1st bout	5.8.17_03_27.15_av17_scrm	5.8.17_03_27.15_av17_scrm.wav	0.708	2733	3952	0.106	0.149718	2733.9	4758.4	2024.5	3876.8	385.59	95.8	9.3e-06	1.96007	23.77	-0.73	2.4	4349.7	6158.5	7622.8
477	RAv17_04	97	N	1	3	15	1	1	1	1966	19	F	English	N			NA	Y	48	28		40	43	83	0.595238	0.606061	0.487179	5.12.17_01_02.10_av17_scrms_1st bout	5.8.17_03_27.15_av17_scrm	5.8.17_03_27.15_av17_scrm.wav	0.708	2733	3952	0.106	0.149718	2733.9	4758.4	2024.5	3876.8	385.59	95.8	9.3e-06	1.96007	23.77	-0.73	2.4	4349.7	6158.5	7622.8
478	RAv17_04	93	N	1	2	15	1	1	1	160	19	F	English	N			NA	Y	53	37		38	38	76	0.52381	0.30303	0.487179	5.12.17_01_02.10_av17_scrms_1st bout	5.8.17_03_27.15_av17_scrm	5.8.17_03_27.15_av17_scrm.wav	0.708	2733	3952	0.106	0.149718	2733.9	4758.4	2024.5	3876.8	385.59	95.8	9.3e-06	1.96007	23.77	-0.73	2.4	4349.7	6158.5	7622.8
479	RAv17_04	100	N	1	4	28	1	0	2	1565	21	F	Mandarin	N			NA	Y	50	36		NA	NA	NA	0.619048	0.424242	0.641026	5.12.17_01_02.10_av17_scrms_1st bout	5.8.17_03_27.15_av17_scrm	5.8.17_03_27.15_av17_scrm.wav	0.708	2733	3952	0.106	0.149718	2733.9	4758.4	2024.5	3876.8	385.59	95.8	9.3e-06	1.96007	23.77	-0.73	2.4	4349.7	6158.5	7622.8
480	RAv17_04	54	N	1	3	23	1	0	2	207	18	F	Chinese	N			NA	N	35	41		NA	NA	NA	0.535714	0.424242	0.538462	5.12.17_01_02.10_av17_scrms_1st bout	5.8.17_03_27.15_av17_scrm	5.8.17_03_27.15_av17_scrm.wav	0.708	2733	3952	0.106	0.149718	2733.9	4758.4	2024.5	3876.8	385.59	95.8	9.3e-06	1.96007	23.77	-0.73	2.4	4349.7	6158.5	7622.8
481	RAv17_04	37	N	1	4	39	1	0	2	277	19	F	Spanish	N			NA	Y	44	32		NA	NA	NA	0.52381	0.606061	0.641026	5.12.17_01_02.10_av17_scrms_1st bout	5.8.17_03_27.15_av17_scrm	5.8.17_03_27.15_av17_scrm.wav	0.708	2733	3952	0.106	0.149718	2733.9	4758.4	2024.5	3876.8	385.59	95.8	9.3e-06	1.96007	23.77	-0.73	2.4	4349.7	6158.5	7622.8
482	RAv17_04	3	N	1	1	8	1	0	2	1425	28	M	English	N			NA	Y	39	30		45	42	87	0.559524	0.575758	0.487179	5.12.17_01_02.10_av17_scrms_1st bout	5.8.17_03_27.15_av17_scrm	5.8.17_03_27.15_av17_scrm.wav	0.708	2733	3952	0.106	0.149718	2733.9	4758.4	2024.5	3876.8	385.59	95.8	9.3e-06	1.96007	23.77	-0.73	2.4	4349.7	6158.5	7622.8
483	RAv17_04	19	N	1	4	13	1	0	2	269	51	F	English	Y	mice	240	NA	Y	36	29		43	47	90	0.511905	0.575758	0.487179	5.12.17_01_02.10_av17_scrms_1st bout	5.8.17_03_27.15_av17_scrm	5.8.17_03_27.15_av17_scrm.wav	0.708	2733	3952	0.106	0.149718	2733.9	4758.4	2024.5	3876.8	385.59	95.8	9.3e-06	1.96007	23.77	-0.73	2.4	4349.7	6158.5	7622.8
484	RAv17_04	75	N	1	4	24	1	1	1	9	19	M	Chinese	Y	fruitfly, termites	1.5	NA	N	58	38		NA	NA	NA	0.547619	0.484848	0.461538	5.12.17_01_02.10_av17_scrms_1st bout	5.8.17_03_27.15_av17_scrm	5.8.17_03_27.15_av17_scrm.wav	0.708	2733	3952	0.106	0.149718	2733.9	4758.4	2024.5	3876.8	385.59	95.8	9.3e-06	1.96007	23.77	-0.73	2.4	4349.7	6158.5	7622.8
485	RAv17_04	106	N	1	3	4	1	0	2	209	18	F	Korean	N			NA	Y	53	39		NA	NA	NA	0.607143	0.606061	0.461538	5.12.17_01_02.10_av17_scrms_1st bout	5.8.17_03_27.15_av17_scrm	5.8.17_03_27.15_av17_scrm.wav	0.708	2733	3952	0.106	0.149718	2733.9	4758.4	2024.5	3876.8	385.59	95.8	9.3e-06	1.96007	23.77	-0.73	2.4	4349.7	6158.5	7622.8
486	RAv17_04	507	Y	1	2	35	1	0	2	2172	27	F	English	Y	Rhesus macaque, tufted capuchins	60	48	Y	NA	NA		NA	NA	NA	0.547619	1	0.666667	5.12.17_01_02.10_av17_scrms_1st bout	5.8.17_03_27.15_av17_scrm	5.8.17_03_27.15_av17_scrm.wav	0.708	2733	3952	0.106	0.149718	2733.9	4758.4	2024.5	3876.8	385.59	95.8	9.3e-06	1.96007	23.77	-0.73	2.4	4349.7	6158.5	7622.8
487	RAv17_04	72	N	1	1	22	1	0	2	976	19	F	English	N			NA	Y	48	33		35	31	66	0.511905	0.69697	0.538462	5.12.17_01_02.10_av17_scrms_1st bout	5.8.17_03_27.15_av17_scrm	5.8.17_03_27.15_av17_scrm.wav	0.708	2733	3952	0.106	0.149718	2733.9	4758.4	2024.5	3876.8	385.59	95.8	9.3e-06	1.96007	23.77	-0.73	2.4	4349.7	6158.5	7622.8
488	RAv17_04	50	N	1	3	14	1	1	1	7	19	F	English	Y	dogs, cats	12	NA	Y	53	40		24	19	43	0.5	0.212121	0.512821	5.12.17_01_02.10_av17_scrms_1st bout	5.8.17_03_27.15_av17_scrm	5.8.17_03_27.15_av17_scrm.wav	0.708	2733	3952	0.106	0.149718	2733.9	4758.4	2024.5	3876.8	385.59	95.8	9.3e-06	1.96007	23.77	-0.73	2.4	4349.7	6158.5	7622.8
489	RAv17_04	25	N	1	4	18	1	1	1	725	21	M	English	N			NA	N	56	32		34	41	75	0.5	0.575758	0.461538	5.12.17_01_02.10_av17_scrms_1st bout	5.8.17_03_27.15_av17_scrm	5.8.17_03_27.15_av17_scrm.wav	0.708	2733	3952	0.106	0.149718	2733.9	4758.4	2024.5	3876.8	385.59	95.8	9.3e-06	1.96007	23.77	-0.73	2.4	4349.7	6158.5	7622.8
490	RAv17_04	10	N	1	2	7	1	0	2	4336	21	F	English	N			NA	Y	50	38		36	38	74	0.559524	0.757576	0.358974	5.12.17_01_02.10_av17_scrms_1st bout	5.8.17_03_27.15_av17_scrm	5.8.17_03_27.15_av17_scrm.wav	0.708	2733	3952	0.106	0.149718	2733.9	4758.4	2024.5	3876.8	385.59	95.8	9.3e-06	1.96007	23.77	-0.73	2.4	4349.7	6158.5	7622.8
491	RAv17_04	9	N	1	2	7	1	0	2	364	19	M	English	Y	dogs, cats	3	NA	Y	41	31		35	32	67	0.416667	0.121212	0.435897	5.12.17_01_02.10_av17_scrms_1st bout	5.8.17_03_27.15_av17_scrm	5.8.17_03_27.15_av17_scrm.wav	0.708	2733	3952	0.106	0.149718	2733.9	4758.4	2024.5	3876.8	385.59	95.8	9.3e-06	1.96007	23.77	-0.73	2.4	4349.7	6158.5	7622.8
492	RAv17_04	38	N	1	3	39	1	0	2	279	18	F	English	N			NA	Y	57	36		41	41	82	0.619048	0.606061	0.615385	5.12.17_01_02.10_av17_scrms_1st bout	5.8.17_03_27.15_av17_scrm	5.8.17_03_27.15_av17_scrm.wav	0.708	2733	3952	0.106	0.149718	2733.9	4758.4	2024.5	3876.8	385.59	95.8	9.3e-06	1.96007	23.77	-0.73	2.4	4349.7	6158.5	7622.8
493	RAv17_04	508	Y	1	1	34	1	1	1	1251	40	F	English	Y	Rhesus macaque, pigtail macaque, sooty mangabey	192	120	Y	NA	NA		NA	NA	NA	0.511905	0.969697	0.641026	5.12.17_01_02.10_av17_scrms_1st bout	5.8.17_03_27.15_av17_scrm	5.8.17_03_27.15_av17_scrm.wav	0.708	2733	3952	0.106	0.149718	2733.9	4758.4	2024.5	3876.8	385.59	95.8	9.3e-06	1.96007	23.77	-0.73	2.4	4349.7	6158.5	7622.8
494	RAv17_04	91	N	1	4	7	1	1	1	42	20	F	Chinese	N			NA	N	49	36		NA	NA	NA	0.547619	0.606061	0.641026	5.12.17_01_02.10_av17_scrms_1st bout	5.8.17_03_27.15_av17_scrm	5.8.17_03_27.15_av17_scrm.wav	0.708	2733	3952	0.106	0.149718	2733.9	4758.4	2024.5	3876.8	385.59	95.8	9.3e-06	1.96007	23.77	-0.73	2.4	4349.7	6158.5	7622.8
495	RAv17_04	20	Y	1	3	25	1	1	1	535	37	F	English	Y	Rhesus, chimpanzees, dogs, cats, mice, rats	180	132	Y	52	33		46	47	93	0.392857	0.454545	0.589744	5.12.17_01_02.10_av17_scrms_1st bout	5.8.17_03_27.15_av17_scrm	5.8.17_03_27.15_av17_scrm.wav	0.708	2733	3952	0.106	0.149718	2733.9	4758.4	2024.5	3876.8	385.59	95.8	9.3e-06	1.96007	23.77	-0.73	2.4	4349.7	6158.5	7622.8
496	RAv17_04	108	N	1	4	21	1	0	2	634	19	M	English	N			NA	N	59	24		45	43	88	0.571429	0.393939	0.435897	5.12.17_01_02.10_av17_scrms_1st bout	5.8.17_03_27.15_av17_scrm	5.8.17_03_27.15_av17_scrm.wav	0.708	2733	3952	0.106	0.149718	2733.9	4758.4	2024.5	3876.8	385.59	95.8	9.3e-06	1.96007	23.77	-0.73	2.4	4349.7	6158.5	7622.8
497	RAv17_04	53	N	1	4	16	1	0	2	393	18	F	English	N			NA	N	71	47		22	17	39	0.642857	0.787879	0.641026	5.12.17_01_02.10_av17_scrms_1st bout	5.8.17_03_27.15_av17_scrm	5.8.17_03_27.15_av17_scrm.wav	0.708	2733	3952	0.106	0.149718	2733.9	4758.4	2024.5	3876.8	385.59	95.8	9.3e-06	1.96007	23.77	-0.73	2.4	4349.7	6158.5	7622.8
498	RAv17_04	47	N	1	1	6	1	0	2	2801	18	F	English	N			NA	Y	60	42		42	45	87	0.47619	0.30303	0.333333	5.12.17_01_02.10_av17_scrms_1st bout	5.8.17_03_27.15_av17_scrm	5.8.17_03_27.15_av17_scrm.wav	0.708	2733	3952	0.106	0.149718	2733.9	4758.4	2024.5	3876.8	385.59	95.8	9.3e-06	1.96007	23.77	-0.73	2.4	4349.7	6158.5	7622.8
499	RAv17_04	56	N	1	1	23	1	0	2	219	18	F	Chinese	N			NA	Y	31	30		NA	NA	NA	0.595238	0.575758	0.384615	5.12.17_01_02.10_av17_scrms_1st bout	5.8.17_03_27.15_av17_scrm	5.8.17_03_27.15_av17_scrm.wav	0.708	2733	3952	0.106	0.149718	2733.9	4758.4	2024.5	3876.8	385.59	95.8	9.3e-06	1.96007	23.77	-0.73	2.4	4349.7	6158.5	7622.8
500	RAv17_04	77	N	1	4	11	1	0	2	112	19	M	Chinese	N			NA	Y	46	18		NA	NA	NA	0.595238	0.454545	0.538462	5.12.17_01_02.10_av17_scrms_1st bout	5.8.17_03_27.15_av17_scrm	5.8.17_03_27.15_av17_scrm.wav	0.708	2733	3952	0.106	0.149718	2733.9	4758.4	2024.5	3876.8	385.59	95.8	9.3e-06	1.96007	23.77	-0.73	2.4	4349.7	6158.5	7622.8
501	RAv17_05	111	N	1	2	13	2	1	2	43	21	F	English	N			NA	N	39	39		40	36	76	0.511905	0.575758	0.512821	5.12.17_01_02.10_av17_scrms_2nd bout	5.8.17_03_27.15_av17_scrm	5.12.17_01_02.10_av17_scrms_2nd bout.wav	0.427	4508	3041	0.046	0.107728	2918.1	6003.9	3085.8	3550.9	772.26	90.7	7.64e-06	1.45115	24.68	2.7	2.9	5857	7407.4	8354.9
502	RAv17_05	86	N	1	3	18	2	0	1	379	22	M	Chinese	N			NA	Y	44	35		NA	NA	NA	0.666667	0.515152	0.641026	5.12.17_01_02.10_av17_scrms_2nd bout	5.8.17_03_27.15_av17_scrm	5.12.17_01_02.10_av17_scrms_2nd bout.wav	0.427	4508	3041	0.046	0.107728	2918.1	6003.9	3085.8	3550.9	772.26	90.7	7.64e-06	1.45115	24.68	2.7	2.9	5857	7407.4	8354.9
503	RAv17_05	30	N	1	3	2	2	0	1	876	19	F	Chinese	N			NA	N	43	31		NA	NA	NA	0.535714	0.151515	0.641026	5.12.17_01_02.10_av17_scrms_2nd bout	5.8.17_03_27.15_av17_scrm	5.12.17_01_02.10_av17_scrms_2nd bout.wav	0.427	4508	3041	0.046	0.107728	2918.1	6003.9	3085.8	3550.9	772.26	90.7	7.64e-06	1.45115	24.68	2.7	2.9	5857	7407.4	8354.9
504	RAv17_05	26	N	1	4	6	2	0	1	643	24	M	Telugu	N			NA	N	41	35		NA	NA	NA	0.607143	0.515152	0.538462	5.12.17_01_02.10_av17_scrms_2nd bout	5.8.17_03_27.15_av17_scrm	5.12.17_01_02.10_av17_scrms_2nd bout.wav	0.427	4508	3041	0.046	0.107728	2918.1	6003.9	3085.8	3550.9	772.26	90.7	7.64e-06	1.45115	24.68	2.7	2.9	5857	7407.4	8354.9
505	RAv17_05	39	N	1	4	15	2	0	1	637	19	F	Spanish/English	N			NA	Y	55	38		41	43	84	0.583333	0.454545	0.538462	5.12.17_01_02.10_av17_scrms_2nd bout	5.8.17_03_27.15_av17_scrm	5.12.17_01_02.10_av17_scrms_2nd bout.wav	0.427	4508	3041	0.046	0.107728	2918.1	6003.9	3085.8	3550.9	772.26	90.7	7.64e-06	1.45115	24.68	2.7	2.9	5857	7407.4	8354.9
506	RAv17_05	76	N	1	2	35	2	1	2	1204	19	F	Chinese	N			NA	Y	41	41		NA	NA	NA	0.630952	0.393939	0.538462	5.12.17_01_02.10_av17_scrms_2nd bout	5.8.17_03_27.15_av17_scrm	5.12.17_01_02.10_av17_scrms_2nd bout.wav	0.427	4508	3041	0.046	0.107728	2918.1	6003.9	3085.8	3550.9	772.26	90.7	7.64e-06	1.45115	24.68	2.7	2.9	5857	7407.4	8354.9
507	RAv17_05	95	N	1	1	32	2	0	1	980	20	F	English	N			NA	Y	57	30		39	44	83	0.571429	0.363636	0.564103	5.12.17_01_02.10_av17_scrms_2nd bout	5.8.17_03_27.15_av17_scrm	5.12.17_01_02.10_av17_scrms_2nd bout.wav	0.427	4508	3041	0.046	0.107728	2918.1	6003.9	3085.8	3550.9	772.26	90.7	7.64e-06	1.45115	24.68	2.7	2.9	5857	7407.4	8354.9
508	RAv17_05	38	N	1	3	18	2	0	1	374	18	F	English	N			NA	Y	57	36		41	41	82	0.619048	0.606061	0.615385	5.12.17_01_02.10_av17_scrms_2nd bout	5.8.17_03_27.15_av17_scrm	5.12.17_01_02.10_av17_scrms_2nd bout.wav	0.427	4508	3041	0.046	0.107728	2918.1	6003.9	3085.8	3550.9	772.26	90.7	7.64e-06	1.45115	24.68	2.7	2.9	5857	7407.4	8354.9
509	RAv17_05	74	N	1	3	26	2	0	1	1215	19	F	English	Y	cats, dogs	1	NA	Y	47	41		41	43	84	0.428571	0.272727	0.538462	5.12.17_01_02.10_av17_scrms_2nd bout	5.8.17_03_27.15_av17_scrm	5.12.17_01_02.10_av17_scrms_2nd bout.wav	0.427	4508	3041	0.046	0.107728	2918.1	6003.9	3085.8	3550.9	772.26	90.7	7.64e-06	1.45115	24.68	2.7	2.9	5857	7407.4	8354.9
510	RAv17_05	107	N	1	2	5	2	0	1	337	22	F	Chinese	N			NA	N	21	37		NA	NA	NA	0.595238	0.424242	0.435897	5.12.17_01_02.10_av17_scrms_2nd bout	5.8.17_03_27.15_av17_scrm	5.12.17_01_02.10_av17_scrms_2nd bout.wav	0.427	4508	3041	0.046	0.107728	2918.1	6003.9	3085.8	3550.9	772.26	90.7	7.64e-06	1.45115	24.68	2.7	2.9	5857	7407.4	8354.9
511	RAv17_05	71	N	1	1	23	2	0	1	1078	19	M	English	N			NA	Y	44	36		43	43	86	0.595238	0.424242	0.333333	5.12.17_01_02.10_av17_scrms_2nd bout	5.8.17_03_27.15_av17_scrm	5.12.17_01_02.10_av17_scrms_2nd bout.wav	0.427	4508	3041	0.046	0.107728	2918.1	6003.9	3085.8	3550.9	772.26	90.7	7.64e-06	1.45115	24.68	2.7	2.9	5857	7407.4	8354.9
512	RAv17_05	69	N	1	1	29	2	0	1	891	20	F	English	N			NA	Y	40	37		42	43	85	0.547619	0.424242	0.615385	5.12.17_01_02.10_av17_scrms_2nd bout	5.8.17_03_27.15_av17_scrm	5.12.17_01_02.10_av17_scrms_2nd bout.wav	0.427	4508	3041	0.046	0.107728	2918.1	6003.9	3085.8	3550.9	772.26	90.7	7.64e-06	1.45115	24.68	2.7	2.9	5857	7407.4	8354.9
513	RAv17_05	3	N	1	1	17	2	0	1	1595	28	M	English	N			NA	Y	39	30		45	42	87	0.559524	0.575758	0.487179	5.12.17_01_02.10_av17_scrms_2nd bout	5.8.17_03_27.15_av17_scrm	5.12.17_01_02.10_av17_scrms_2nd bout.wav	0.427	4508	3041	0.046	0.107728	2918.1	6003.9	3085.8	3550.9	772.26	90.7	7.64e-06	1.45115	24.68	2.7	2.9	5857	7407.4	8354.9
514	RAv17_05	101	N	1	1	27	2	0	1	283	19	F	English	Y	mice	11	NA	Y	50	40		43	43	86	0.690476	0.484848	0.487179	5.12.17_01_02.10_av17_scrms_2nd bout	5.8.17_03_27.15_av17_scrm	5.12.17_01_02.10_av17_scrms_2nd bout.wav	0.427	4508	3041	0.046	0.107728	2918.1	6003.9	3085.8	3550.9	772.26	90.7	7.64e-06	1.45115	24.68	2.7	2.9	5857	7407.4	8354.9
515	RAv17_05	511	Y	1	4	26	2	0	1	451	24	F	English	Y	Rhesus macaque, domestic cats	24	24	Y	NA	NA		NA	NA	NA	0.571429	0.69697	0.512821	5.12.17_01_02.10_av17_scrms_2nd bout	5.8.17_03_27.15_av17_scrm	5.12.17_01_02.10_av17_scrms_2nd bout.wav	0.427	4508	3041	0.046	0.107728	2918.1	6003.9	3085.8	3550.9	772.26	90.7	7.64e-06	1.45115	24.68	2.7	2.9	5857	7407.4	8354.9
516	RAv17_05	102	N	1	3	25	2	0	1	211	18	F	English	Y	elephants, dogs, tortoises	3	NA	Y	46	44		33	36	69	0.559524	0.424242	0.461538	5.12.17_01_02.10_av17_scrms_2nd bout	5.8.17_03_27.15_av17_scrm	5.12.17_01_02.10_av17_scrms_2nd bout.wav	0.427	4508	3041	0.046	0.107728	2918.1	6003.9	3085.8	3550.9	772.26	90.7	7.64e-06	1.45115	24.68	2.7	2.9	5857	7407.4	8354.9
517	RAv17_05	64	N	1	2	19	2	0	1	194	18	F	English	N			NA	N	55	36		40	42	82	0.654762	0.393939	0.666667	5.12.17_01_02.10_av17_scrms_2nd bout	5.8.17_03_27.15_av17_scrm	5.12.17_01_02.10_av17_scrms_2nd bout.wav	0.427	4508	3041	0.046	0.107728	2918.1	6003.9	3085.8	3550.9	772.26	90.7	7.64e-06	1.45115	24.68	2.7	2.9	5857	7407.4	8354.9
518	RAv17_05	27	N	1	1	16	2	1	2	406	23	F	Telugu	N			NA	N	32	44		NA	NA	NA	0.547619	0.151515	0.512821	5.12.17_01_02.10_av17_scrms_2nd bout	5.8.17_03_27.15_av17_scrm	5.12.17_01_02.10_av17_scrms_2nd bout.wav	0.427	4508	3041	0.046	0.107728	2918.1	6003.9	3085.8	3550.9	772.26	90.7	7.64e-06	1.45115	24.68	2.7	2.9	5857	7407.4	8354.9
519	RAv17_05	82	N	1	1	2	2	0	1	431	18	F	Korean	Y	dogs, cats	3	NA	Y	31	40		NA	NA	NA	0.559524	0.333333	0.641026	5.12.17_01_02.10_av17_scrms_2nd bout	5.8.17_03_27.15_av17_scrm	5.12.17_01_02.10_av17_scrms_2nd bout.wav	0.427	4508	3041	0.046	0.107728	2918.1	6003.9	3085.8	3550.9	772.26	90.7	7.64e-06	1.45115	24.68	2.7	2.9	5857	7407.4	8354.9
520	RAv17_05	506	Y	1	3	22	2	0	1	344	37	F	English	Y	Rhesus macaque	120	120	Y	NA	NA		NA	NA	NA	0.559524	0.424242	0.487179	5.12.17_01_02.10_av17_scrms_2nd bout	5.8.17_03_27.15_av17_scrm	5.12.17_01_02.10_av17_scrms_2nd bout.wav	0.427	4508	3041	0.046	0.107728	2918.1	6003.9	3085.8	3550.9	772.26	90.7	7.64e-06	1.45115	24.68	2.7	2.9	5857	7407.4	8354.9
521	RAv17_05	10	N	1	2	31	2	1	2	2344	21	F	English	N			NA	Y	50	38		36	38	74	0.559524	0.757576	0.358974	5.12.17_01_02.10_av17_scrms_2nd bout	5.8.17_03_27.15_av17_scrm	5.12.17_01_02.10_av17_scrms_2nd bout.wav	0.427	4508	3041	0.046	0.107728	2918.1	6003.9	3085.8	3550.9	772.26	90.7	7.64e-06	1.45115	24.68	2.7	2.9	5857	7407.4	8354.9
522	RAv17_05	84	N	1	1	10	2	0	1	1137	19	F	English	N			NA	Y	34	36		35	37	72	0.547619	0.575758	0.512821	5.12.17_01_02.10_av17_scrms_2nd bout	5.8.17_03_27.15_av17_scrm	5.12.17_01_02.10_av17_scrms_2nd bout.wav	0.427	4508	3041	0.046	0.107728	2918.1	6003.9	3085.8	3550.9	772.26	90.7	7.64e-06	1.45115	24.68	2.7	2.9	5857	7407.4	8354.9
523	RAv17_05	42	N	1	1	6	2	0	1	1203	19	F	English	N			NA	N	35	28		44	44	88	0.571429	0.454545	0.692308	5.12.17_01_02.10_av17_scrms_2nd bout	5.8.17_03_27.15_av17_scrm	5.12.17_01_02.10_av17_scrms_2nd bout.wav	0.427	4508	3041	0.046	0.107728	2918.1	6003.9	3085.8	3550.9	772.26	90.7	7.64e-06	1.45115	24.68	2.7	2.9	5857	7407.4	8354.9
524	RAv17_05	98	N	1	1	18	2	0	1	234	18	F	English	N			NA	Y	36	39		37	48	85	0.690476	0.393939	0.538462	5.12.17_01_02.10_av17_scrms_2nd bout	5.8.17_03_27.15_av17_scrm	5.12.17_01_02.10_av17_scrms_2nd bout.wav	0.427	4508	3041	0.046	0.107728	2918.1	6003.9	3085.8	3550.9	772.26	90.7	7.64e-06	1.45115	24.68	2.7	2.9	5857	7407.4	8354.9
525	RAv17_05	6	N	1	2	15	2	0	1	268	23	M	English	Y	mice	3	NA	Y	31	28		38	41	79	0.595238	0.484848	0.589744	5.12.17_01_02.10_av17_scrms_2nd bout	5.8.17_03_27.15_av17_scrm	5.12.17_01_02.10_av17_scrms_2nd bout.wav	0.427	4508	3041	0.046	0.107728	2918.1	6003.9	3085.8	3550.9	772.26	90.7	7.64e-06	1.45115	24.68	2.7	2.9	5857	7407.4	8354.9
526	RAv17_05	58	N	1	2	8	2	0	1	1482	21	F	Spanish	Y	mice, rats	2	NA	Y	53	33		NA	NA	NA	0.547619	0.515152	0.461538	5.12.17_01_02.10_av17_scrms_2nd bout	5.8.17_03_27.15_av17_scrm	5.12.17_01_02.10_av17_scrms_2nd bout.wav	0.427	4508	3041	0.046	0.107728	2918.1	6003.9	3085.8	3550.9	772.26	90.7	7.64e-06	1.45115	24.68	2.7	2.9	5857	7407.4	8354.9
527	RAv17_05	47	N	1	1	2	2	0	1	267	18	F	English	N			NA	Y	60	42		42	45	87	0.47619	0.30303	0.333333	5.12.17_01_02.10_av17_scrms_2nd bout	5.8.17_03_27.15_av17_scrm	5.12.17_01_02.10_av17_scrms_2nd bout.wav	0.427	4508	3041	0.046	0.107728	2918.1	6003.9	3085.8	3550.9	772.26	90.7	7.64e-06	1.45115	24.68	2.7	2.9	5857	7407.4	8354.9
528	RAv17_05	80	N	1	1	13	2	0	1	85	18	F	English	N			NA	Y	57	34		36	3	39	0.607143	0.545455	0.358974	5.12.17_01_02.10_av17_scrms_2nd bout	5.8.17_03_27.15_av17_scrm	5.12.17_01_02.10_av17_scrms_2nd bout.wav	0.427	4508	3041	0.046	0.107728	2918.1	6003.9	3085.8	3550.9	772.26	90.7	7.64e-06	1.45115	24.68	2.7	2.9	5857	7407.4	8354.9
529	RAv17_05	61	N	1	3	3	2	0	1	591	19	M	English	N			NA	Y	42	36		43	35	78	0.619048	0.424242	0.461538	5.12.17_01_02.10_av17_scrms_2nd bout	5.8.17_03_27.15_av17_scrm	5.12.17_01_02.10_av17_scrms_2nd bout.wav	0.427	4508	3041	0.046	0.107728	2918.1	6003.9	3085.8	3550.9	772.26	90.7	7.64e-06	1.45115	24.68	2.7	2.9	5857	7407.4	8354.9
530	RAv17_05	51	N	1	3	12	2	0	1	1466	18	F	English	N			NA	Y	31	36		45	44	89	0.654762	0.515152	0.615385	5.12.17_01_02.10_av17_scrms_2nd bout	5.8.17_03_27.15_av17_scrm	5.12.17_01_02.10_av17_scrms_2nd bout.wav	0.427	4508	3041	0.046	0.107728	2918.1	6003.9	3085.8	3550.9	772.26	90.7	7.64e-06	1.45115	24.68	2.7	2.9	5857	7407.4	8354.9
531	RAv17_05	513	Y	1	3	39	2	1	2	1479	53	F	English	Y	chimps, bonobos, Rhesus macaque, Sooty mangabeys, pigtail macaque, gibbons, orangutan, stumptail macaques, baboons	288	288	Y	NA	NA		NA	NA	NA	0.535714	0.969697	0.589744	5.12.17_01_02.10_av17_scrms_2nd bout	5.8.17_03_27.15_av17_scrm	5.12.17_01_02.10_av17_scrms_2nd bout.wav	0.427	4508	3041	0.046	0.107728	2918.1	6003.9	3085.8	3550.9	772.26	90.7	7.64e-06	1.45115	24.68	2.7	2.9	5857	7407.4	8354.9
532	RAv17_05	62	N	1	1	25	2	0	1	2152	18	F	English	Y	mice	1	NA	Y	59	32		46	40	86	0.559524	0.484848	0.538462	5.12.17_01_02.10_av17_scrms_2nd bout	5.8.17_03_27.15_av17_scrm	5.12.17_01_02.10_av17_scrms_2nd bout.wav	0.427	4508	3041	0.046	0.107728	2918.1	6003.9	3085.8	3550.9	772.26	90.7	7.64e-06	1.45115	24.68	2.7	2.9	5857	7407.4	8354.9
533	RAv17_05	63	N	1	3	2	2	0	1	503	19	F	English	N			NA	N	60	40		44	42	86	0.535714	0	0.717949	5.12.17_01_02.10_av17_scrms_2nd bout	5.8.17_03_27.15_av17_scrm	5.12.17_01_02.10_av17_scrms_2nd bout.wav	0.427	4508	3041	0.046	0.107728	2918.1	6003.9	3085.8	3550.9	772.26	90.7	7.64e-06	1.45115	24.68	2.7	2.9	5857	7407.4	8354.9
534	RAv17_05	112	N	1	3	8	2	1	2	194	18	M	Turkish	N			NA	Y	55	40		NA	NA	NA	0.535714	0.424242	0.461538	5.12.17_01_02.10_av17_scrms_2nd bout	5.8.17_03_27.15_av17_scrm	5.12.17_01_02.10_av17_scrms_2nd bout.wav	0.427	4508	3041	0.046	0.107728	2918.1	6003.9	3085.8	3550.9	772.26	90.7	7.64e-06	1.45115	24.68	2.7	2.9	5857	7407.4	8354.9
535	RAv17_05	77	N	1	4	29	2	0	1	823	19	M	Chinese	N			NA	Y	46	18		NA	NA	NA	0.595238	0.454545	0.538462	5.12.17_01_02.10_av17_scrms_2nd bout	5.8.17_03_27.15_av17_scrm	5.12.17_01_02.10_av17_scrms_2nd bout.wav	0.427	4508	3041	0.046	0.107728	2918.1	6003.9	3085.8	3550.9	772.26	90.7	7.64e-06	1.45115	24.68	2.7	2.9	5857	7407.4	8354.9
536	RAv17_05	1	N	1	2	13	2	0	1	318	20	F	English	Y	cats, dogs	12	NA	Y	38	33		NA	40	NA	0.642857	0.333333	0.564103	5.12.17_01_02.10_av17_scrms_2nd bout	5.8.17_03_27.15_av17_scrm	5.12.17_01_02.10_av17_scrms_2nd bout.wav	0.427	4508	3041	0.046	0.107728	2918.1	6003.9	3085.8	3550.9	772.26	90.7	7.64e-06	1.45115	24.68	2.7	2.9	5857	7407.4	8354.9
537	RAv17_05	65	N	1	4	9	2	0	1	1649	20	F	Arabic	Y			NA	N	36	35		NA	NA	NA	0.559524	0.363636	0.564103	5.12.17_01_02.10_av17_scrms_2nd bout	5.8.17_03_27.15_av17_scrm	5.12.17_01_02.10_av17_scrms_2nd bout.wav	0.427	4508	3041	0.046	0.107728	2918.1	6003.9	3085.8	3550.9	772.26	90.7	7.64e-06	1.45115	24.68	2.7	2.9	5857	7407.4	8354.9
538	RAv17_05	54	N	1	3	32	2	0	1	1490	18	F	Chinese	N			NA	N	35	41		NA	NA	NA	0.535714	0.424242	0.538462	5.12.17_01_02.10_av17_scrms_2nd bout	5.8.17_03_27.15_av17_scrm	5.12.17_01_02.10_av17_scrms_2nd bout.wav	0.427	4508	3041	0.046	0.107728	2918.1	6003.9	3085.8	3550.9	772.26	90.7	7.64e-06	1.45115	24.68	2.7	2.9	5857	7407.4	8354.9
539	RAv17_05	18	N	1	1	15	2	0	1	104	20	F	English	N			NA	Y	44	35		32	42	74	0.571429	0.151515	0.333333	5.12.17_01_02.10_av17_scrms_2nd bout	5.8.17_03_27.15_av17_scrm	5.12.17_01_02.10_av17_scrms_2nd bout.wav	0.427	4508	3041	0.046	0.107728	2918.1	6003.9	3085.8	3550.9	772.26	90.7	7.64e-06	1.45115	24.68	2.7	2.9	5857	7407.4	8354.9
540	RAv17_05	41	N	1	2	8	2	0	1	662	20	M	Vietnamese	N			NA	Y	45	29		NA	NA	NA	0.630952	0.454545	0.435897	5.12.17_01_02.10_av17_scrms_2nd bout	5.8.17_03_27.15_av17_scrm	5.12.17_01_02.10_av17_scrms_2nd bout.wav	0.427	4508	3041	0.046	0.107728	2918.1	6003.9	3085.8	3550.9	772.26	90.7	7.64e-06	1.45115	24.68	2.7	2.9	5857	7407.4	8354.9
541	RAv17_05	60	N	1	1	22	2	0	1	457	18	F	Chinese	N			NA	Y	54	33		NA	NA	NA	0.595238	0.69697	0.615385	5.12.17_01_02.10_av17_scrms_2nd bout	5.8.17_03_27.15_av17_scrm	5.12.17_01_02.10_av17_scrms_2nd bout.wav	0.427	4508	3041	0.046	0.107728	2918.1	6003.9	3085.8	3550.9	772.26	90.7	7.64e-06	1.45115	24.68	2.7	2.9	5857	7407.4	8354.9
542	RAv17_05	100	N	1	4	1	2	0	1	1829	21	F	Mandarin	N			NA	Y	50	36		NA	NA	NA	0.619048	0.424242	0.641026	5.12.17_01_02.10_av17_scrms_2nd bout	5.8.17_03_27.15_av17_scrm	5.12.17_01_02.10_av17_scrms_2nd bout.wav	0.427	4508	3041	0.046	0.107728	2918.1	6003.9	3085.8	3550.9	772.26	90.7	7.64e-06	1.45115	24.68	2.7	2.9	5857	7407.4	8354.9
543	RAv17_05	23	N	1	2	28	2	0	1	109	20	F	Mandarin	N			NA	N	38	33		NA	NA	NA	0.52381	0.575758	0.564103	5.12.17_01_02.10_av17_scrms_2nd bout	5.8.17_03_27.15_av17_scrm	5.12.17_01_02.10_av17_scrms_2nd bout.wav	0.427	4508	3041	0.046	0.107728	2918.1	6003.9	3085.8	3550.9	772.26	90.7	7.64e-06	1.45115	24.68	2.7	2.9	5857	7407.4	8354.9
544	RAv17_05	52	N	1	3	27	2	0	1	84	19	F	English	N			NA	Y	55	38		42	43	85	0.619048	0.393939	0.512821	5.12.17_01_02.10_av17_scrms_2nd bout	5.8.17_03_27.15_av17_scrm	5.12.17_01_02.10_av17_scrms_2nd bout.wav	0.427	4508	3041	0.046	0.107728	2918.1	6003.9	3085.8	3550.9	772.26	90.7	7.64e-06	1.45115	24.68	2.7	2.9	5857	7407.4	8354.9
545	RAv17_05	57	N	1	2	7	2	0	1	2002	20	F	English	N			NA	N	29	31		27	41	68	0.547619	0.333333	0.538462	5.12.17_01_02.10_av17_scrms_2nd bout	5.8.17_03_27.15_av17_scrm	5.12.17_01_02.10_av17_scrms_2nd bout.wav	0.427	4508	3041	0.046	0.107728	2918.1	6003.9	3085.8	3550.9	772.26	90.7	7.64e-06	1.45115	24.68	2.7	2.9	5857	7407.4	8354.9
546	RAv17_05	19	N	1	4	31	2	0	1	372	51	F	English	Y	mice	240	NA	Y	36	29		43	47	90	0.511905	0.575758	0.487179	5.12.17_01_02.10_av17_scrms_2nd bout	5.8.17_03_27.15_av17_scrm	5.12.17_01_02.10_av17_scrms_2nd bout.wav	0.427	4508	3041	0.046	0.107728	2918.1	6003.9	3085.8	3550.9	772.26	90.7	7.64e-06	1.45115	24.68	2.7	2.9	5857	7407.4	8354.9
547	RAv17_05	94	N	1	3	36	2	0	1	50	20	F	English	N			NA	Y	45	44		40	44	84	0.72619	0.878788	0.410256	5.12.17_01_02.10_av17_scrms_2nd bout	5.8.17_03_27.15_av17_scrm	5.12.17_01_02.10_av17_scrms_2nd bout.wav	0.427	4508	3041	0.046	0.107728	2918.1	6003.9	3085.8	3550.9	772.26	90.7	7.64e-06	1.45115	24.68	2.7	2.9	5857	7407.4	8354.9
548	RAv17_05	104	N	1	2	21	2	0	1	639	19	F	Bangla	N			NA	N	49	31		NA	NA	NA	0.619048	0.363636	0.384615	5.12.17_01_02.10_av17_scrms_2nd bout	5.8.17_03_27.15_av17_scrm	5.12.17_01_02.10_av17_scrms_2nd bout.wav	0.427	4508	3041	0.046	0.107728	2918.1	6003.9	3085.8	3550.9	772.26	90.7	7.64e-06	1.45115	24.68	2.7	2.9	5857	7407.4	8354.9
549	RAv17_05	13	N	1	3	13	2	0	1	1166	19	F	English	N			NA	N	21	34		42	41	83	0.5	0.666667	0.487179	5.12.17_01_02.10_av17_scrms_2nd bout	5.8.17_03_27.15_av17_scrm	5.12.17_01_02.10_av17_scrms_2nd bout.wav	0.427	4508	3041	0.046	0.107728	2918.1	6003.9	3085.8	3550.9	772.26	90.7	7.64e-06	1.45115	24.68	2.7	2.9	5857	7407.4	8354.9
550	RAv17_05	78	N	1	1	18	2	0	1	182	20	M	Spanish	Y	dogs, snakes	2	NA	Y	45	35		NA	NA	NA	0.547619	0.424242	0.487179	5.12.17_01_02.10_av17_scrms_2nd bout	5.8.17_03_27.15_av17_scrm	5.12.17_01_02.10_av17_scrms_2nd bout.wav	0.427	4508	3041	0.046	0.107728	2918.1	6003.9	3085.8	3550.9	772.26	90.7	7.64e-06	1.45115	24.68	2.7	2.9	5857	7407.4	8354.9
551	RAv17_05	75	N	1	4	5	2	0	1	1140	19	M	Chinese	Y	fruitfly, termites	1.5	NA	N	58	38		NA	NA	NA	0.547619	0.484848	0.461538	5.12.17_01_02.10_av17_scrms_2nd bout	5.8.17_03_27.15_av17_scrm	5.12.17_01_02.10_av17_scrms_2nd bout.wav	0.427	4508	3041	0.046	0.107728	2918.1	6003.9	3085.8	3550.9	772.26	90.7	7.64e-06	1.45115	24.68	2.7	2.9	5857	7407.4	8354.9
552	RAv17_05	37	N	1	4	30	2	0	1	108	19	F	Spanish	N			NA	Y	44	32		NA	NA	NA	0.52381	0.606061	0.641026	5.12.17_01_02.10_av17_scrms_2nd bout	5.8.17_03_27.15_av17_scrm	5.12.17_01_02.10_av17_scrms_2nd bout.wav	0.427	4508	3041	0.046	0.107728	2918.1	6003.9	3085.8	3550.9	772.26	90.7	7.64e-06	1.45115	24.68	2.7	2.9	5857	7407.4	8354.9
553	RAv17_05	11	N	1	2	28	2	0	1	2687	20	F	English (mainly) + Hindi	Y	dogs	6	NA	Y	66	45	noted w/ regard to coos that it is upsetting - sounds like they're in pain. Noted surpirse that screams would be more intense context than coos	34	41	75	0.666667	0.545455	0.641026	5.12.17_01_02.10_av17_scrms_2nd bout	5.8.17_03_27.15_av17_scrm	5.12.17_01_02.10_av17_scrms_2nd bout.wav	0.427	4508	3041	0.046	0.107728	2918.1	6003.9	3085.8	3550.9	772.26	90.7	7.64e-06	1.45115	24.68	2.7	2.9	5857	7407.4	8354.9
554	RAv17_05	17	N	1	4	16	2	0	1	1060	19	F	Chinese	N			NA	Y	49	34		NA	NA	NA	0.595238	1	0.487179	5.12.17_01_02.10_av17_scrms_2nd bout	5.8.17_03_27.15_av17_scrm	5.12.17_01_02.10_av17_scrms_2nd bout.wav	0.427	4508	3041	0.046	0.107728	2918.1	6003.9	3085.8	3550.9	772.26	90.7	7.64e-06	1.45115	24.68	2.7	2.9	5857	7407.4	8354.9
555	RAv17_05	40	N	1	1	9	2	0	1	291	19	F	Chinese	N			NA	N	39	39		NA	NA	NA	0.666667	0.515152	0.512821	5.12.17_01_02.10_av17_scrms_2nd bout	5.8.17_03_27.15_av17_scrm	5.12.17_01_02.10_av17_scrms_2nd bout.wav	0.427	4508	3041	0.046	0.107728	2918.1	6003.9	3085.8	3550.9	772.26	90.7	7.64e-06	1.45115	24.68	2.7	2.9	5857	7407.4	8354.9
556	RAv17_05	110	N	1	4	17	2	1	2	447	19	M	English	N			NA	Y	40	32		35	38	73	0.511905	0.69697	0.564103	5.12.17_01_02.10_av17_scrms_2nd bout	5.8.17_03_27.15_av17_scrm	5.12.17_01_02.10_av17_scrms_2nd bout.wav	0.427	4508	3041	0.046	0.107728	2918.1	6003.9	3085.8	3550.9	772.26	90.7	7.64e-06	1.45115	24.68	2.7	2.9	5857	7407.4	8354.9
557	RAv17_05	93	N	1	2	21	2	0	1	295	19	F	English	N			NA	Y	53	37		38	38	76	0.52381	0.30303	0.487179	5.12.17_01_02.10_av17_scrms_2nd bout	5.8.17_03_27.15_av17_scrm	5.12.17_01_02.10_av17_scrms_2nd bout.wav	0.427	4508	3041	0.046	0.107728	2918.1	6003.9	3085.8	3550.9	772.26	90.7	7.64e-06	1.45115	24.68	2.7	2.9	5857	7407.4	8354.9
558	RAv17_05	508	Y	1	1	32	2	0	1	1061	40	F	English	Y	Rhesus macaque, pigtail macaque, sooty mangabey	192	120	Y	NA	NA		NA	NA	NA	0.511905	0.969697	0.641026	5.12.17_01_02.10_av17_scrms_2nd bout	5.8.17_03_27.15_av17_scrm	5.12.17_01_02.10_av17_scrms_2nd bout.wav	0.427	4508	3041	0.046	0.107728	2918.1	6003.9	3085.8	3550.9	772.26	90.7	7.64e-06	1.45115	24.68	2.7	2.9	5857	7407.4	8354.9
559	RAv17_05	31	N	1	2	19	2	1	2	862	18	F	English	N			NA	Y	47	35		38	40	78	0.583333	0.575758	0.384615	5.12.17_01_02.10_av17_scrms_2nd bout	5.8.17_03_27.15_av17_scrm	5.12.17_01_02.10_av17_scrms_2nd bout.wav	0.427	4508	3041	0.046	0.107728	2918.1	6003.9	3085.8	3550.9	772.26	90.7	7.64e-06	1.45115	24.68	2.7	2.9	5857	7407.4	8354.9
560	RAv17_05	55	N	1	1	1	2	0	1	481	18	F	Mandarin	N			NA	Y	64	30		NA	NA	NA	0.690476	0.515152	0.410256	5.12.17_01_02.10_av17_scrms_2nd bout	5.8.17_03_27.15_av17_scrm	5.12.17_01_02.10_av17_scrms_2nd bout.wav	0.427	4508	3041	0.046	0.107728	2918.1	6003.9	3085.8	3550.9	772.26	90.7	7.64e-06	1.45115	24.68	2.7	2.9	5857	7407.4	8354.9
561	RAv17_05	81	N	1	2	30	2	0	1	1453	18	F	English	N			NA	Y	53	33		43	51	94	0.690476	0.454545	0.538462	5.12.17_01_02.10_av17_scrms_2nd bout	5.8.17_03_27.15_av17_scrm	5.12.17_01_02.10_av17_scrms_2nd bout.wav	0.427	4508	3041	0.046	0.107728	2918.1	6003.9	3085.8	3550.9	772.26	90.7	7.64e-06	1.45115	24.68	2.7	2.9	5857	7407.4	8354.9
562	RAv17_05	106	N	1	3	29	2	0	1	123	18	F	Korean	N			NA	Y	53	39		NA	NA	NA	0.607143	0.606061	0.461538	5.12.17_01_02.10_av17_scrms_2nd bout	5.8.17_03_27.15_av17_scrm	5.12.17_01_02.10_av17_scrms_2nd bout.wav	0.427	4508	3041	0.046	0.107728	2918.1	6003.9	3085.8	3550.9	772.26	90.7	7.64e-06	1.45115	24.68	2.7	2.9	5857	7407.4	8354.9
563	RAv17_05	96	N	1	4	14	2	0	1	2345	18	F	English	N			NA	Y	59	39		44	47	91	0.583333	0.727273	0.512821	5.12.17_01_02.10_av17_scrms_2nd bout	5.8.17_03_27.15_av17_scrm	5.12.17_01_02.10_av17_scrms_2nd bout.wav	0.427	4508	3041	0.046	0.107728	2918.1	6003.9	3085.8	3550.9	772.26	90.7	7.64e-06	1.45115	24.68	2.7	2.9	5857	7407.4	8354.9
564	RAv17_05	49	N	1	3	5	2	0	1	402	18	F	English	N			NA	N	44	28		42	2	44	0.642857	0.454545	0.487179	5.12.17_01_02.10_av17_scrms_2nd bout	5.8.17_03_27.15_av17_scrm	5.12.17_01_02.10_av17_scrms_2nd bout.wav	0.427	4508	3041	0.046	0.107728	2918.1	6003.9	3085.8	3550.9	772.26	90.7	7.64e-06	1.45115	24.68	2.7	2.9	5857	7407.4	8354.9
565	RAv17_05	91	N	1	4	39	2	0	1	1313	20	F	Chinese	N			NA	N	49	36		NA	NA	NA	0.547619	0.606061	0.641026	5.12.17_01_02.10_av17_scrms_2nd bout	5.8.17_03_27.15_av17_scrm	5.12.17_01_02.10_av17_scrms_2nd bout.wav	0.427	4508	3041	0.046	0.107728	2918.1	6003.9	3085.8	3550.9	772.26	90.7	7.64e-06	1.45115	24.68	2.7	2.9	5857	7407.4	8354.9
566	RAv17_05	56	N	1	1	24	2	0	1	82	18	F	Chinese	N			NA	Y	31	30		NA	NA	NA	0.595238	0.575758	0.384615	5.12.17_01_02.10_av17_scrms_2nd bout	5.8.17_03_27.15_av17_scrm	5.12.17_01_02.10_av17_scrms_2nd bout.wav	0.427	4508	3041	0.046	0.107728	2918.1	6003.9	3085.8	3550.9	772.26	90.7	7.64e-06	1.45115	24.68	2.7	2.9	5857	7407.4	8354.9
567	RAv17_05	87	N	1	1	17	2	0	1	119	19	F	Korean	N			NA	Y	53	41		NA	NA	NA	0.654762	0.787879	0.615385	5.12.17_01_02.10_av17_scrms_2nd bout	5.8.17_03_27.15_av17_scrm	5.12.17_01_02.10_av17_scrms_2nd bout.wav	0.427	4508	3041	0.046	0.107728	2918.1	6003.9	3085.8	3550.9	772.26	90.7	7.64e-06	1.45115	24.68	2.7	2.9	5857	7407.4	8354.9
568	RAv17_05	8	N	1	3	24	2	0	1	219	19	F	English	Y	dogs, cats	24	NA	Y	58	40		39	43	82	0.595238	0.363636	0.589744	5.12.17_01_02.10_av17_scrms_2nd bout	5.8.17_03_27.15_av17_scrm	5.12.17_01_02.10_av17_scrms_2nd bout.wav	0.427	4508	3041	0.046	0.107728	2918.1	6003.9	3085.8	3550.9	772.26	90.7	7.64e-06	1.45115	24.68	2.7	2.9	5857	7407.4	8354.9
569	RAv17_05	99	N	1	2	13	2	0	1	140	19	F	English + Hindi	N			NA	Y	56	37		37	39	76	0.595238	0.30303	0.461538	5.12.17_01_02.10_av17_scrms_2nd bout	5.8.17_03_27.15_av17_scrm	5.12.17_01_02.10_av17_scrms_2nd bout.wav	0.427	4508	3041	0.046	0.107728	2918.1	6003.9	3085.8	3550.9	772.26	90.7	7.64e-06	1.45115	24.68	2.7	2.9	5857	7407.4	8354.9
570	RAv17_05	108	N	1	4	11	2	1	2	458	19	M	English	N			NA	N	59	24		45	43	88	0.571429	0.393939	0.435897	5.12.17_01_02.10_av17_scrms_2nd bout	5.8.17_03_27.15_av17_scrm	5.12.17_01_02.10_av17_scrms_2nd bout.wav	0.427	4508	3041	0.046	0.107728	2918.1	6003.9	3085.8	3550.9	772.26	90.7	7.64e-06	1.45115	24.68	2.7	2.9	5857	7407.4	8354.9
571	RAv17_05	512	Y	1	1	20	2	0	1	419	39	M	English	Y	Rhesus macaque, pigtail macaque, common chimpanzee, west lowland gorilla, Sooty mangabey	144	144	Y	NA	NA	occasionally needed to answer radio during task	NA	NA	NA	0.642857	1	0.589744	5.12.17_01_02.10_av17_scrms_2nd bout	5.8.17_03_27.15_av17_scrm	5.12.17_01_02.10_av17_scrms_2nd bout.wav	0.427	4508	3041	0.046	0.107728	2918.1	6003.9	3085.8	3550.9	772.26	90.7	7.64e-06	1.45115	24.68	2.7	2.9	5857	7407.4	8354.9
572	RAv17_05	32	N	1	3	9	2	0	1	638	23	F	English	N			NA	N	58	26		34	33	67	0.559524	0.424242	0.435897	5.12.17_01_02.10_av17_scrms_2nd bout	5.8.17_03_27.15_av17_scrm	5.12.17_01_02.10_av17_scrms_2nd bout.wav	0.427	4508	3041	0.046	0.107728	2918.1	6003.9	3085.8	3550.9	772.26	90.7	7.64e-06	1.45115	24.68	2.7	2.9	5857	7407.4	8354.9
573	RAv17_05	89	N	1	2	12	2	0	1	249	18	F	Spanish	N			NA	Y	50	37		NA	NA	NA	0.619048	0.818182	0.589744	5.12.17_01_02.10_av17_scrms_2nd bout	5.8.17_03_27.15_av17_scrm	5.12.17_01_02.10_av17_scrms_2nd bout.wav	0.427	4508	3041	0.046	0.107728	2918.1	6003.9	3085.8	3550.9	772.26	90.7	7.64e-06	1.45115	24.68	2.7	2.9	5857	7407.4	8354.9
574	RAv17_05	73	N	1	2	18	2	0	1	2323	19	F	English and Chinese	N			NA	Y	41	37		34	36	70	0.571429	0.575758	0.538462	5.12.17_01_02.10_av17_scrms_2nd bout	5.8.17_03_27.15_av17_scrm	5.12.17_01_02.10_av17_scrms_2nd bout.wav	0.427	4508	3041	0.046	0.107728	2918.1	6003.9	3085.8	3550.9	772.26	90.7	7.64e-06	1.45115	24.68	2.7	2.9	5857	7407.4	8354.9
575	RAv17_05	34	N	1	1	33	2	0	1	2594	24	M	Mandarin	N			NA	N	15	37		NA	NA	NA	0.511905	0.757576	0.282051	5.12.17_01_02.10_av17_scrms_2nd bout	5.8.17_03_27.15_av17_scrm	5.12.17_01_02.10_av17_scrms_2nd bout.wav	0.427	4508	3041	0.046	0.107728	2918.1	6003.9	3085.8	3550.9	772.26	90.7	7.64e-06	1.45115	24.68	2.7	2.9	5857	7407.4	8354.9
576	RAv17_05	53	N	1	4	31	2	0	1	633	18	F	English	N			NA	N	71	47		22	17	39	0.642857	0.787879	0.641026	5.12.17_01_02.10_av17_scrms_2nd bout	5.8.17_03_27.15_av17_scrm	5.12.17_01_02.10_av17_scrms_2nd bout.wav	0.427	4508	3041	0.046	0.107728	2918.1	6003.9	3085.8	3550.9	772.26	90.7	7.64e-06	1.45115	24.68	2.7	2.9	5857	7407.4	8354.9
577	RAv17_05	22	N	1	4	16	2	1	2	910	31	F	English	Y	dogs, cats	6	NA	Y	56	49		47	46	93	0.452381	0.515152	0.692308	5.12.17_01_02.10_av17_scrms_2nd bout	5.8.17_03_27.15_av17_scrm	5.12.17_01_02.10_av17_scrms_2nd bout.wav	0.427	4508	3041	0.046	0.107728	2918.1	6003.9	3085.8	3550.9	772.26	90.7	7.64e-06	1.45115	24.68	2.7	2.9	5857	7407.4	8354.9
578	RAv17_05	29	N	1	3	18	2	0	1	232	19	F	English	Y	dogs, cats	3	NA	Y	63	44		47	41	88	0.547619	0.454545	0.512821	5.12.17_01_02.10_av17_scrms_2nd bout	5.8.17_03_27.15_av17_scrm	5.12.17_01_02.10_av17_scrms_2nd bout.wav	0.427	4508	3041	0.046	0.107728	2918.1	6003.9	3085.8	3550.9	772.26	90.7	7.64e-06	1.45115	24.68	2.7	2.9	5857	7407.4	8354.9
579	RAv17_05	90	N	1	4	12	2	1	2	2096	21	M	English	N			NA	N	43	24		42	42	84	0.52381	0.69697	0.641026	5.12.17_01_02.10_av17_scrms_2nd bout	5.8.17_03_27.15_av17_scrm	5.12.17_01_02.10_av17_scrms_2nd bout.wav	0.427	4508	3041	0.046	0.107728	2918.1	6003.9	3085.8	3550.9	772.26	90.7	7.64e-06	1.45115	24.68	2.7	2.9	5857	7407.4	8354.9
580	RAv17_05	105	N	1	4	18	2	1	2	315	19	F	English	N			NA	Y	44	36		40	42	82	0.571429	0.606061	0.435897	5.12.17_01_02.10_av17_scrms_2nd bout	5.8.17_03_27.15_av17_scrm	5.12.17_01_02.10_av17_scrms_2nd bout.wav	0.427	4508	3041	0.046	0.107728	2918.1	6003.9	3085.8	3550.9	772.26	90.7	7.64e-06	1.45115	24.68	2.7	2.9	5857	7407.4	8354.9
581	RAv17_05	88	N	1	2	31	2	0	1	545	19	M	Mandarin	N			NA	Y	49	27		NA	NA	NA	0.547619	0.818182	0.538462	5.12.17_01_02.10_av17_scrms_2nd bout	5.8.17_03_27.15_av17_scrm	5.12.17_01_02.10_av17_scrms_2nd bout.wav	0.427	4508	3041	0.046	0.107728	2918.1	6003.9	3085.8	3550.9	772.26	90.7	7.64e-06	1.45115	24.68	2.7	2.9	5857	7407.4	8354.9
582	RAv17_05	97	N	1	3	35	2	1	2	649	19	F	English	N			NA	Y	48	28		40	43	83	0.595238	0.606061	0.487179	5.12.17_01_02.10_av17_scrms_2nd bout	5.8.17_03_27.15_av17_scrm	5.12.17_01_02.10_av17_scrms_2nd bout.wav	0.427	4508	3041	0.046	0.107728	2918.1	6003.9	3085.8	3550.9	772.26	90.7	7.64e-06	1.45115	24.68	2.7	2.9	5857	7407.4	8354.9
583	RAv17_05	72	N	1	1	28	2	0	1	3187	19	F	English	N			NA	Y	48	33		35	31	66	0.511905	0.69697	0.538462	5.12.17_01_02.10_av17_scrms_2nd bout	5.8.17_03_27.15_av17_scrm	5.12.17_01_02.10_av17_scrms_2nd bout.wav	0.427	4508	3041	0.046	0.107728	2918.1	6003.9	3085.8	3550.9	772.26	90.7	7.64e-06	1.45115	24.68	2.7	2.9	5857	7407.4	8354.9
584	RAv17_05	79	N	1	2	8	2	0	1	312	21	M	English	N			NA	Y	55	38		33	34	67	0.571429	0.393939	0.564103	5.12.17_01_02.10_av17_scrms_2nd bout	5.8.17_03_27.15_av17_scrm	5.12.17_01_02.10_av17_scrms_2nd bout.wav	0.427	4508	3041	0.046	0.107728	2918.1	6003.9	3085.8	3550.9	772.26	90.7	7.64e-06	1.45115	24.68	2.7	2.9	5857	7407.4	8354.9
585	RAv17_05	509	Y	1	2	31	2	0	1	325	28	M	Spanish/English	Y	Rhesus macaque, mangabey	48	48	Y	NA	NA		NA	NA	NA	0.464286	0.969697	0.615385	5.12.17_01_02.10_av17_scrms_2nd bout	5.8.17_03_27.15_av17_scrm	5.12.17_01_02.10_av17_scrms_2nd bout.wav	0.427	4508	3041	0.046	0.107728	2918.1	6003.9	3085.8	3550.9	772.26	90.7	7.64e-06	1.45115	24.68	2.7	2.9	5857	7407.4	8354.9
586	RAv17_05	4	N	1	2	6	2	0	1	3406	20	M	English	N			NA	N	43	38		27	24	51	0.559524	0.424242	0.589744	5.12.17_01_02.10_av17_scrms_2nd bout	5.8.17_03_27.15_av17_scrm	5.12.17_01_02.10_av17_scrms_2nd bout.wav	0.427	4508	3041	0.046	0.107728	2918.1	6003.9	3085.8	3550.9	772.26	90.7	7.64e-06	1.45115	24.68	2.7	2.9	5857	7407.4	8354.9
587	RAv17_05	44	N	1	4	23	2	0	1	2009	31	F	English	N			NA	Y	39	34		47	45	92	0.571429	0.606061	0.333333	5.12.17_01_02.10_av17_scrms_2nd bout	5.8.17_03_27.15_av17_scrm	5.12.17_01_02.10_av17_scrms_2nd bout.wav	0.427	4508	3041	0.046	0.107728	2918.1	6003.9	3085.8	3550.9	772.26	90.7	7.64e-06	1.45115	24.68	2.7	2.9	5857	7407.4	8354.9
588	RAv17_05	510	Y	1	4	5	2	0	1	10362	30	M	English	Y	Rhesus macaque, Sooty mangabey	60	60	Y	NA	NA	asked for more clarification on "intense emotion" ~3 min into task	NA	NA	NA	0.511905	0.727273	0.717949	5.12.17_01_02.10_av17_scrms_2nd bout	5.8.17_03_27.15_av17_scrm	5.12.17_01_02.10_av17_scrms_2nd bout.wav	0.427	4508	3041	0.046	0.107728	2918.1	6003.9	3085.8	3550.9	772.26	90.7	7.64e-06	1.45115	24.68	2.7	2.9	5857	7407.4	8354.9
589	RAv17_05	85	N	1	2	36	2	0	1	2645	19	F	Chinese	N			NA	Y	25	32		NA	NA	NA	0.571429	0.363636	0.435897	5.12.17_01_02.10_av17_scrms_2nd bout	5.8.17_03_27.15_av17_scrm	5.12.17_01_02.10_av17_scrms_2nd bout.wav	0.427	4508	3041	0.046	0.107728	2918.1	6003.9	3085.8	3550.9	772.26	90.7	7.64e-06	1.45115	24.68	2.7	2.9	5857	7407.4	8354.9
590	RAv17_05	502	Y	1	4	5	2	0	1	1160	39	F	English	Y	Rhesus, pigrails, gorillas, orangutans, lemurs	216	204	Y	63	30		45	43	88	0.642857	0.909091	0.666667	5.12.17_01_02.10_av17_scrms_2nd bout	5.8.17_03_27.15_av17_scrm	5.12.17_01_02.10_av17_scrms_2nd bout.wav	0.427	4508	3041	0.046	0.107728	2918.1	6003.9	3085.8	3550.9	772.26	90.7	7.64e-06	1.45115	24.68	2.7	2.9	5857	7407.4	8354.9
591	RAv17_05	5	N	1	1	33	2	0	1	808	29	F	English	Y	cat, dog, horse, cow	6+ years	NA	Y	41	35		46	49	95	0.583333	0.393939	0.564103	5.12.17_01_02.10_av17_scrms_2nd bout	5.8.17_03_27.15_av17_scrm	5.12.17_01_02.10_av17_scrms_2nd bout.wav	0.427	4508	3041	0.046	0.107728	2918.1	6003.9	3085.8	3550.9	772.26	90.7	7.64e-06	1.45115	24.68	2.7	2.9	5857	7407.4	8354.9
592	RAv17_05	70	N	1	1	37	2	0	1	2606	18	F	English	N			NA	Y	62	34		48	45	93	0.52381	0.242424	0.384615	5.12.17_01_02.10_av17_scrms_2nd bout	5.8.17_03_27.15_av17_scrm	5.12.17_01_02.10_av17_scrms_2nd bout.wav	0.427	4508	3041	0.046	0.107728	2918.1	6003.9	3085.8	3550.9	772.26	90.7	7.64e-06	1.45115	24.68	2.7	2.9	5857	7407.4	8354.9
593	RAv17_05	24	N	1	4	18	2	0	1	4	20	M	English	N			NA	N	41	24		35	36	71	0.404762	0.363636	0.666667	5.12.17_01_02.10_av17_scrms_2nd bout	5.8.17_03_27.15_av17_scrm	5.12.17_01_02.10_av17_scrms_2nd bout.wav	0.427	4508	3041	0.046	0.107728	2918.1	6003.9	3085.8	3550.9	772.26	90.7	7.64e-06	1.45115	24.68	2.7	2.9	5857	7407.4	8354.9
594	RAv17_05	59	N	1	2	15	2	0	1	234	18	M	Gujarati	N			NA	N	37	38		NA	NA	NA	0.52381	0.393939	0.666667	5.12.17_01_02.10_av17_scrms_2nd bout	5.8.17_03_27.15_av17_scrm	5.12.17_01_02.10_av17_scrms_2nd bout.wav	0.427	4508	3041	0.046	0.107728	2918.1	6003.9	3085.8	3550.9	772.26	90.7	7.64e-06	1.45115	24.68	2.7	2.9	5857	7407.4	8354.9
595	RAv17_05	68	N	1	4	6	2	1	2	1118	19	M	Spanish	N			NA	N	48	NA	didn't fill out this questionnaire animal	NA	NA	NA	0.607143	0.333333	0.641026	5.12.17_01_02.10_av17_scrms_2nd bout	5.8.17_03_27.15_av17_scrm	5.12.17_01_02.10_av17_scrms_2nd bout.wav	0.427	4508	3041	0.046	0.107728	2918.1	6003.9	3085.8	3550.9	772.26	90.7	7.64e-06	1.45115	24.68	2.7	2.9	5857	7407.4	8354.9
596	RAv17_05	501	Y	1	1	5	2	0	1	234	26	M	English	Y	lemurs (black white ruffed, ringtail, red bellied, crown, mongoose), Rhesus monkeys, gorillas, orangutans	Lemur: 24, Rh: 48, Gorilla: 12, Orangutan: 12	48	Y	47	37		46	44	90	0.559524	0.69697	0.461538	5.12.17_01_02.10_av17_scrms_2nd bout	5.8.17_03_27.15_av17_scrm	5.12.17_01_02.10_av17_scrms_2nd bout.wav	0.427	4508	3041	0.046	0.107728	2918.1	6003.9	3085.8	3550.9	772.26	90.7	7.64e-06	1.45115	24.68	2.7	2.9	5857	7407.4	8354.9
597	RAv17_05	83	N	1	4	22	2	0	1	855	19	F	English	N			NA	Y	55	46		48	46	94	0.5	0.333333	0.487179	5.12.17_01_02.10_av17_scrms_2nd bout	5.8.17_03_27.15_av17_scrm	5.12.17_01_02.10_av17_scrms_2nd bout.wav	0.427	4508	3041	0.046	0.107728	2918.1	6003.9	3085.8	3550.9	772.26	90.7	7.64e-06	1.45115	24.68	2.7	2.9	5857	7407.4	8354.9
598	RAv17_05	21	N	1	2	33	2	1	2	443	20	F	English	Y	dogs	6	NA	Y	44	37		41	34	75	0.630952	0.787879	0.384615	5.12.17_01_02.10_av17_scrms_2nd bout	5.8.17_03_27.15_av17_scrm	5.12.17_01_02.10_av17_scrms_2nd bout.wav	0.427	4508	3041	0.046	0.107728	2918.1	6003.9	3085.8	3550.9	772.26	90.7	7.64e-06	1.45115	24.68	2.7	2.9	5857	7407.4	8354.9
599	RAv17_05	92	N	1	3	11	2	1	2	386	18	F	English	N			NA	Y	45	30		36	36	72	0.595238	0.212121	0.589744	5.12.17_01_02.10_av17_scrms_2nd bout	5.8.17_03_27.15_av17_scrm	5.12.17_01_02.10_av17_scrms_2nd bout.wav	0.427	4508	3041	0.046	0.107728	2918.1	6003.9	3085.8	3550.9	772.26	90.7	7.64e-06	1.45115	24.68	2.7	2.9	5857	7407.4	8354.9
600	RAv17_05	48	N	1	3	15	2	1	2	4666	19	F	English	N			NA	Y	33	36		36	46	82	0.654762	0.606061	0.564103	5.12.17_01_02.10_av17_scrms_2nd bout	5.8.17_03_27.15_av17_scrm	5.12.17_01_02.10_av17_scrms_2nd bout.wav	0.427	4508	3041	0.046	0.107728	2918.1	6003.9	3085.8	3550.9	772.26	90.7	7.64e-06	1.45115	24.68	2.7	2.9	5857	7407.4	8354.9
601	RAv17_05	14	N	1	4	3	2	0	1	2579	19	M	English and Mandarin	N			NA	N	43	35		32	39	71	0.642857	0.818182	0.615385	5.12.17_01_02.10_av17_scrms_2nd bout	5.8.17_03_27.15_av17_scrm	5.12.17_01_02.10_av17_scrms_2nd bout.wav	0.427	4508	3041	0.046	0.107728	2918.1	6003.9	3085.8	3550.9	772.26	90.7	7.64e-06	1.45115	24.68	2.7	2.9	5857	7407.4	8354.9
602	RAv17_05	66	N	1	1	13	2	0	1	1186	20	M	Chinese	N			NA	N	41	38		NA	NA	NA	0.47619	0.69697	0.512821	5.12.17_01_02.10_av17_scrms_2nd bout	5.8.17_03_27.15_av17_scrm	5.12.17_01_02.10_av17_scrms_2nd bout.wav	0.427	4508	3041	0.046	0.107728	2918.1	6003.9	3085.8	3550.9	772.26	90.7	7.64e-06	1.45115	24.68	2.7	2.9	5857	7407.4	8354.9
603	RAv17_05	67	N	1	4	8	2	0	1	153	18	F	English	N			NA	N	29	44		32	32	64	0.75	0.636364	0.564103	5.12.17_01_02.10_av17_scrms_2nd bout	5.8.17_03_27.15_av17_scrm	5.12.17_01_02.10_av17_scrms_2nd bout.wav	0.427	4508	3041	0.046	0.107728	2918.1	6003.9	3085.8	3550.9	772.26	90.7	7.64e-06	1.45115	24.68	2.7	2.9	5857	7407.4	8354.9
604	RAv17_05	25	N	1	4	8	2	0	1	1345	21	M	English	N			NA	N	56	32		34	41	75	0.5	0.575758	0.461538	5.12.17_01_02.10_av17_scrms_2nd bout	5.8.17_03_27.15_av17_scrm	5.12.17_01_02.10_av17_scrms_2nd bout.wav	0.427	4508	3041	0.046	0.107728	2918.1	6003.9	3085.8	3550.9	772.26	90.7	7.64e-06	1.45115	24.68	2.7	2.9	5857	7407.4	8354.9
605	RAv17_05	33	N	1	3	36	2	0	1	243	19	F	Mandarin + English	N			NA	Y	56	33		NA	NA	NA	0.571429	0.272727	0.615385	5.12.17_01_02.10_av17_scrms_2nd bout	5.8.17_03_27.15_av17_scrm	5.12.17_01_02.10_av17_scrms_2nd bout.wav	0.427	4508	3041	0.046	0.107728	2918.1	6003.9	3085.8	3550.9	772.26	90.7	7.64e-06	1.45115	24.68	2.7	2.9	5857	7407.4	8354.9
606	RAv17_05	103	N	1	1	25	2	1	2	503	19	F	Korean + English	Y	dogs, cats	3	NA	Y	47	39		40	41	81	0.52381	0.393939	0.512821	5.12.17_01_02.10_av17_scrms_2nd bout	5.8.17_03_27.15_av17_scrm	5.12.17_01_02.10_av17_scrms_2nd bout.wav	0.427	4508	3041	0.046	0.107728	2918.1	6003.9	3085.8	3550.9	772.26	90.7	7.64e-06	1.45115	24.68	2.7	2.9	5857	7407.4	8354.9
607	RAv17_05	507	Y	1	2	38	2	0	1	741	27	F	English	Y	Rhesus macaque, tufted capuchins	60	48	Y	NA	NA		NA	NA	NA	0.547619	1	0.666667	5.12.17_01_02.10_av17_scrms_2nd bout	5.8.17_03_27.15_av17_scrm	5.12.17_01_02.10_av17_scrms_2nd bout.wav	0.427	4508	3041	0.046	0.107728	2918.1	6003.9	3085.8	3550.9	772.26	90.7	7.64e-06	1.45115	24.68	2.7	2.9	5857	7407.4	8354.9
608	RAv17_05	16	N	1	2	6	2	1	2	496	21	F	English	Y	dogs, cats	6	NA	Y	44	43		38	40	78	0.559524	0.545455	0.461538	5.12.17_01_02.10_av17_scrms_2nd bout	5.8.17_03_27.15_av17_scrm	5.12.17_01_02.10_av17_scrms_2nd bout.wav	0.427	4508	3041	0.046	0.107728	2918.1	6003.9	3085.8	3550.9	772.26	90.7	7.64e-06	1.45115	24.68	2.7	2.9	5857	7407.4	8354.9
609	RAv17_05	9	N	1	2	10	2	0	1	320	19	M	English	Y	dogs, cats	3	NA	Y	41	31		35	32	67	0.416667	0.121212	0.435897	5.12.17_01_02.10_av17_scrms_2nd bout	5.8.17_03_27.15_av17_scrm	5.12.17_01_02.10_av17_scrms_2nd bout.wav	0.427	4508	3041	0.046	0.107728	2918.1	6003.9	3085.8	3550.9	772.26	90.7	7.64e-06	1.45115	24.68	2.7	2.9	5857	7407.4	8354.9
610	RAv17_05	2	N	1	1	23	2	0	1	2446	19	F	English	N			NA	Y	49	42		36	37	73	0.595238	0.0606061	0.641026	5.12.17_01_02.10_av17_scrms_2nd bout	5.8.17_03_27.15_av17_scrm	5.12.17_01_02.10_av17_scrms_2nd bout.wav	0.427	4508	3041	0.046	0.107728	2918.1	6003.9	3085.8	3550.9	772.26	90.7	7.64e-06	1.45115	24.68	2.7	2.9	5857	7407.4	8354.9
611	RAv17_05	50	N	1	3	16	2	1	2	257	19	F	English	Y	dogs, cats	12	NA	Y	53	40		24	19	43	0.5	0.212121	0.512821	5.12.17_01_02.10_av17_scrms_2nd bout	5.8.17_03_27.15_av17_scrm	5.12.17_01_02.10_av17_scrms_2nd bout.wav	0.427	4508	3041	0.046	0.107728	2918.1	6003.9	3085.8	3550.9	772.26	90.7	7.64e-06	1.45115	24.68	2.7	2.9	5857	7407.4	8354.9
612	RAv17_05	113	N	1	1	1	2	0	1	534	18	F	English	N			NA	Y	52	38		47	41	88	0.583333	0.848485	0.564103	5.12.17_01_02.10_av17_scrms_2nd bout	5.8.17_03_27.15_av17_scrm	5.12.17_01_02.10_av17_scrms_2nd bout.wav	0.427	4508	3041	0.046	0.107728	2918.1	6003.9	3085.8	3550.9	772.26	90.7	7.64e-06	1.45115	24.68	2.7	2.9	5857	7407.4	8354.9
613	RAv17_05	46	N	1	1	12	2	0	1	363	18	F	English	N			NA	Y	45	25		39	42	81	0.619048	0.515152	0.589744	5.12.17_01_02.10_av17_scrms_2nd bout	5.8.17_03_27.15_av17_scrm	5.12.17_01_02.10_av17_scrms_2nd bout.wav	0.427	4508	3041	0.046	0.107728	2918.1	6003.9	3085.8	3550.9	772.26	90.7	7.64e-06	1.45115	24.68	2.7	2.9	5857	7407.4	8354.9
614	RAv17_05	15	N	1	2	22	2	0	1	1992	20	F	English and Chinese	N			NA	Y	58	36	didn't make it to face - just voice	NA	36	NA	0.488095	0.393939	0.461538	5.12.17_01_02.10_av17_scrms_2nd bout	5.8.17_03_27.15_av17_scrm	5.12.17_01_02.10_av17_scrms_2nd bout.wav	0.427	4508	3041	0.046	0.107728	2918.1	6003.9	3085.8	3550.9	772.26	90.7	7.64e-06	1.45115	24.68	2.7	2.9	5857	7407.4	8354.9
615	RAv17_05	12	N	1	1	39	2	0	1	512	21	M	Chinese	N			NA	Y	41	34		NA	NA	NA	0.642857	0.484848	0.410256	5.12.17_01_02.10_av17_scrms_2nd bout	5.8.17_03_27.15_av17_scrm	5.12.17_01_02.10_av17_scrms_2nd bout.wav	0.427	4508	3041	0.046	0.107728	2918.1	6003.9	3085.8	3550.9	772.26	90.7	7.64e-06	1.45115	24.68	2.7	2.9	5857	7407.4	8354.9
616	RAv17_05	43	N	1	1	2	2	0	1	312	19	M	English	N			NA	Y	37	39		36	40	76	0.595238	0.666667	0.589744	5.12.17_01_02.10_av17_scrms_2nd bout	5.8.17_03_27.15_av17_scrm	5.12.17_01_02.10_av17_scrms_2nd bout.wav	0.427	4508	3041	0.046	0.107728	2918.1	6003.9	3085.8	3550.9	772.26	90.7	7.64e-06	1.45115	24.68	2.7	2.9	5857	7407.4	8354.9
617	RAv17_05	20	Y	1	3	14	2	0	1	294	37	F	English	Y	Rhesus, chimpanzees, dogs, cats, mice, rats	180	132	Y	52	33		46	47	93	0.392857	0.454545	0.589744	5.12.17_01_02.10_av17_scrms_2nd bout	5.8.17_03_27.15_av17_scrm	5.12.17_01_02.10_av17_scrms_2nd bout.wav	0.427	4508	3041	0.046	0.107728	2918.1	6003.9	3085.8	3550.9	772.26	90.7	7.64e-06	1.45115	24.68	2.7	2.9	5857	7407.4	8354.9
618	RAv17_05	114	N	1	3	23	2	0	1	289	19	M	English	N			NA	Y	58	35		36	38	74	0.607143	0.393939	0.512821	5.12.17_01_02.10_av17_scrms_2nd bout	5.8.17_03_27.15_av17_scrm	5.12.17_01_02.10_av17_scrms_2nd bout.wav	0.427	4508	3041	0.046	0.107728	2918.1	6003.9	3085.8	3550.9	772.26	90.7	7.64e-06	1.45115	24.68	2.7	2.9	5857	7407.4	8354.9
619	RAv17_05	505	Y	1	3	29	2	0	1	945	30	F	English	Y	Rhesus macaque, horses, dogs, cats, birds, mangabey	120	94	Y	NA	NA		NA	NA	NA	0.595238	1	0.589744	5.12.17_01_02.10_av17_scrms_2nd bout	5.8.17_03_27.15_av17_scrm	5.12.17_01_02.10_av17_scrms_2nd bout.wav	0.427	4508	3041	0.046	0.107728	2918.1	6003.9	3085.8	3550.9	772.26	90.7	7.64e-06	1.45115	24.68	2.7	2.9	5857	7407.4	8354.9
620	RAv17_05	109	N	1	2	13	2	1	2	110	20	F	English	N			NA	Y	41	33		45	43	88	0.666667	0.727273	0.384615	5.12.17_01_02.10_av17_scrms_2nd bout	5.8.17_03_27.15_av17_scrm	5.12.17_01_02.10_av17_scrms_2nd bout.wav	0.427	4508	3041	0.046	0.107728	2918.1	6003.9	3085.8	3550.9	772.26	90.7	7.64e-06	1.45115	24.68	2.7	2.9	5857	7407.4	8354.9
621	RAv17_05	7	N	1	4	36	2	1	2	1304	21	F	English	N			NA	Y	49	33		44	43	87	0.583333	0.363636	0.615385	5.12.17_01_02.10_av17_scrms_2nd bout	5.8.17_03_27.15_av17_scrm	5.12.17_01_02.10_av17_scrms_2nd bout.wav	0.427	4508	3041	0.046	0.107728	2918.1	6003.9	3085.8	3550.9	772.26	90.7	7.64e-06	1.45115	24.68	2.7	2.9	5857	7407.4	8354.9
622	RAv17_05	28	N	1	3	2	2	1	2	557	40	F	English	N			NA	Y	50	33		42	NA	NA	0.630952	0.606061	0.564103	5.12.17_01_02.10_av17_scrms_2nd bout	5.8.17_03_27.15_av17_scrm	5.12.17_01_02.10_av17_scrms_2nd bout.wav	0.427	4508	3041	0.046	0.107728	2918.1	6003.9	3085.8	3550.9	772.26	90.7	7.64e-06	1.45115	24.68	2.7	2.9	5857	7407.4	8354.9
623	RAv17_05	36	N	1	2	32	2	0	1	433	19	F	English	Y	dogs, cats	4	NA	Y	53	31		42	42	84	0.416667	0.606061	0.435897	5.12.17_01_02.10_av17_scrms_2nd bout	5.8.17_03_27.15_av17_scrm	5.12.17_01_02.10_av17_scrms_2nd bout.wav	0.427	4508	3041	0.046	0.107728	2918.1	6003.9	3085.8	3550.9	772.26	90.7	7.64e-06	1.45115	24.68	2.7	2.9	5857	7407.4	8354.9
624	RAv17_05	115	N	1	1	28	2	0	1	261	18	M	Mandarin	N			NA	N	31	37		NA	NA	NA	0.583333	0.575758	0.461538	5.12.17_01_02.10_av17_scrms_2nd bout	5.8.17_03_27.15_av17_scrm	5.12.17_01_02.10_av17_scrms_2nd bout.wav	0.427	4508	3041	0.046	0.107728	2918.1	6003.9	3085.8	3550.9	772.26	90.7	7.64e-06	1.45115	24.68	2.7	2.9	5857	7407.4	8354.9
625	RAv17_05	35	N	1	4	32	2	0	1	562	19	M	English	N			NA	N	40	21		44	39	83	0.666667	0.818182	0.641026	5.12.17_01_02.10_av17_scrms_2nd bout	5.8.17_03_27.15_av17_scrm	5.12.17_01_02.10_av17_scrms_2nd bout.wav	0.427	4508	3041	0.046	0.107728	2918.1	6003.9	3085.8	3550.9	772.26	90.7	7.64e-06	1.45115	24.68	2.7	2.9	5857	7407.4	8354.9
626	RAv17_06	1	N	1	2	1	1	0	2	2206	20	F	English	Y	cats, dogs	12	NA	Y	38	33		NA	40	NA	0.642857	0.333333	0.564103	10.19.17_01_27.20_av17_scrms	5.8.17_03_27.15_av17_scrm	5.8.17_03_27.15_av17_scrm.wav	0.708	2733	3952	0.106	0.149718	2733.9	4758.4	2024.5	3876.8	385.59	95.8	9.3e-06	1.96007	23.77	-0.73	2.4	4349.7	6158.5	7622.8
627	RAv17_06	29	N	1	3	2	1	0	2	2348	19	F	English	Y	dogs, cats	3	NA	Y	63	44		47	41	88	0.547619	0.454545	0.512821	10.19.17_01_27.20_av17_scrms	5.8.17_03_27.15_av17_scrm	5.8.17_03_27.15_av17_scrm.wav	0.708	2733	3952	0.106	0.149718	2733.9	4758.4	2024.5	3876.8	385.59	95.8	9.3e-06	1.96007	23.77	-0.73	2.4	4349.7	6158.5	7622.8
628	RAv17_06	73	N	1	2	26	1	1	1	751	19	F	English and Chinese	N			NA	Y	41	37		34	36	70	0.571429	0.575758	0.538462	10.19.17_01_27.20_av17_scrms	5.8.17_03_27.15_av17_scrm	5.8.17_03_27.15_av17_scrm.wav	0.708	2733	3952	0.106	0.149718	2733.9	4758.4	2024.5	3876.8	385.59	95.8	9.3e-06	1.96007	23.77	-0.73	2.4	4349.7	6158.5	7622.8
629	RAv17_06	507	Y	1	2	16	1	0	2	3406	27	F	English	Y	Rhesus macaque, tufted capuchins	60	48	Y	NA	NA		NA	NA	NA	0.547619	1	0.666667	10.19.17_01_27.20_av17_scrms	5.8.17_03_27.15_av17_scrm	5.8.17_03_27.15_av17_scrm.wav	0.708	2733	3952	0.106	0.149718	2733.9	4758.4	2024.5	3876.8	385.59	95.8	9.3e-06	1.96007	23.77	-0.73	2.4	4349.7	6158.5	7622.8
630	RAv17_06	38	N	1	3	19	1	1	1	375	18	F	English	N			NA	Y	57	36		41	41	82	0.619048	0.606061	0.615385	10.19.17_01_27.20_av17_scrms	5.8.17_03_27.15_av17_scrm	5.8.17_03_27.15_av17_scrm.wav	0.708	2733	3952	0.106	0.149718	2733.9	4758.4	2024.5	3876.8	385.59	95.8	9.3e-06	1.96007	23.77	-0.73	2.4	4349.7	6158.5	7622.8
631	RAv17_06	114	N	1	3	10	1	1	1	936	19	M	English	N			NA	Y	58	35		36	38	74	0.607143	0.393939	0.512821	10.19.17_01_27.20_av17_scrms	5.8.17_03_27.15_av17_scrm	5.8.17_03_27.15_av17_scrm.wav	0.708	2733	3952	0.106	0.149718	2733.9	4758.4	2024.5	3876.8	385.59	95.8	9.3e-06	1.96007	23.77	-0.73	2.4	4349.7	6158.5	7622.8
632	RAv17_06	95	N	1	1	23	1	0	2	321	20	F	English	N			NA	Y	57	30		39	44	83	0.571429	0.363636	0.564103	10.19.17_01_27.20_av17_scrms	5.8.17_03_27.15_av17_scrm	5.8.17_03_27.15_av17_scrm.wav	0.708	2733	3952	0.106	0.149718	2733.9	4758.4	2024.5	3876.8	385.59	95.8	9.3e-06	1.96007	23.77	-0.73	2.4	4349.7	6158.5	7622.8
633	RAv17_06	76	N	1	2	36	1	1	1	435	19	F	Chinese	N			NA	Y	41	41		NA	NA	NA	0.630952	0.393939	0.538462	10.19.17_01_27.20_av17_scrms	5.8.17_03_27.15_av17_scrm	5.8.17_03_27.15_av17_scrm.wav	0.708	2733	3952	0.106	0.149718	2733.9	4758.4	2024.5	3876.8	385.59	95.8	9.3e-06	1.96007	23.77	-0.73	2.4	4349.7	6158.5	7622.8
634	RAv17_06	510	Y	1	4	24	1	1	1	5663	30	M	English	Y	Rhesus macaque, Sooty mangabey	60	60	Y	NA	NA	asked for more clarification on "intense emotion" ~3 min into task	NA	NA	NA	0.511905	0.727273	0.717949	10.19.17_01_27.20_av17_scrms	5.8.17_03_27.15_av17_scrm	5.8.17_03_27.15_av17_scrm.wav	0.708	2733	3952	0.106	0.149718	2733.9	4758.4	2024.5	3876.8	385.59	95.8	9.3e-06	1.96007	23.77	-0.73	2.4	4349.7	6158.5	7622.8
635	RAv17_06	101	N	1	1	34	1	1	1	611	19	F	English	Y	mice	11	NA	Y	50	40		43	43	86	0.690476	0.484848	0.487179	10.19.17_01_27.20_av17_scrms	5.8.17_03_27.15_av17_scrm	5.8.17_03_27.15_av17_scrm.wav	0.708	2733	3952	0.106	0.149718	2733.9	4758.4	2024.5	3876.8	385.59	95.8	9.3e-06	1.96007	23.77	-0.73	2.4	4349.7	6158.5	7622.8
636	RAv17_06	86	N	1	3	14	1	1	1	571	22	M	Chinese	N			NA	Y	44	35		NA	NA	NA	0.666667	0.515152	0.641026	10.19.17_01_27.20_av17_scrms	5.8.17_03_27.15_av17_scrm	5.8.17_03_27.15_av17_scrm.wav	0.708	2733	3952	0.106	0.149718	2733.9	4758.4	2024.5	3876.8	385.59	95.8	9.3e-06	1.96007	23.77	-0.73	2.4	4349.7	6158.5	7622.8
637	RAv17_06	26	N	1	4	7	1	0	2	514	24	M	Telugu	N			NA	N	41	35		NA	NA	NA	0.607143	0.515152	0.538462	10.19.17_01_27.20_av17_scrms	5.8.17_03_27.15_av17_scrm	5.8.17_03_27.15_av17_scrm.wav	0.708	2733	3952	0.106	0.149718	2733.9	4758.4	2024.5	3876.8	385.59	95.8	9.3e-06	1.96007	23.77	-0.73	2.4	4349.7	6158.5	7622.8
638	RAv17_06	10	N	1	2	26	1	0	2	545	21	F	English	N			NA	Y	50	38		36	38	74	0.559524	0.757576	0.358974	10.19.17_01_27.20_av17_scrms	5.8.17_03_27.15_av17_scrm	5.8.17_03_27.15_av17_scrm.wav	0.708	2733	3952	0.106	0.149718	2733.9	4758.4	2024.5	3876.8	385.59	95.8	9.3e-06	1.96007	23.77	-0.73	2.4	4349.7	6158.5	7622.8
639	RAv17_06	52	N	1	3	6	1	1	1	711	19	F	English	N			NA	Y	55	38		42	43	85	0.619048	0.393939	0.512821	10.19.17_01_27.20_av17_scrms	5.8.17_03_27.15_av17_scrm	5.8.17_03_27.15_av17_scrm.wav	0.708	2733	3952	0.106	0.149718	2733.9	4758.4	2024.5	3876.8	385.59	95.8	9.3e-06	1.96007	23.77	-0.73	2.4	4349.7	6158.5	7622.8
640	RAv17_06	105	N	1	4	5	1	1	1	1545	19	F	English	N			NA	Y	44	36		40	42	82	0.571429	0.606061	0.435897	10.19.17_01_27.20_av17_scrms	5.8.17_03_27.15_av17_scrm	5.8.17_03_27.15_av17_scrm.wav	0.708	2733	3952	0.106	0.149718	2733.9	4758.4	2024.5	3876.8	385.59	95.8	9.3e-06	1.96007	23.77	-0.73	2.4	4349.7	6158.5	7622.8
641	RAv17_06	111	N	1	2	14	1	1	1	414	21	F	English	N			NA	N	39	39		40	36	76	0.511905	0.575758	0.512821	10.19.17_01_27.20_av17_scrms	5.8.17_03_27.15_av17_scrm	5.8.17_03_27.15_av17_scrm.wav	0.708	2733	3952	0.106	0.149718	2733.9	4758.4	2024.5	3876.8	385.59	95.8	9.3e-06	1.96007	23.77	-0.73	2.4	4349.7	6158.5	7622.8
642	RAv17_06	5	N	1	1	22	1	0	2	2119	29	F	English	Y	cat, dog, horse, cow	6+ years	NA	Y	41	35		46	49	95	0.583333	0.393939	0.564103	10.19.17_01_27.20_av17_scrms	5.8.17_03_27.15_av17_scrm	5.8.17_03_27.15_av17_scrm.wav	0.708	2733	3952	0.106	0.149718	2733.9	4758.4	2024.5	3876.8	385.59	95.8	9.3e-06	1.96007	23.77	-0.73	2.4	4349.7	6158.5	7622.8
643	RAv17_06	23	N	1	2	9	1	0	2	918	20	F	Mandarin	N			NA	N	38	33		NA	NA	NA	0.52381	0.575758	0.564103	10.19.17_01_27.20_av17_scrms	5.8.17_03_27.15_av17_scrm	5.8.17_03_27.15_av17_scrm.wav	0.708	2733	3952	0.106	0.149718	2733.9	4758.4	2024.5	3876.8	385.59	95.8	9.3e-06	1.96007	23.77	-0.73	2.4	4349.7	6158.5	7622.8
644	RAv17_06	80	N	1	1	12	1	0	2	439	18	F	English	N			NA	Y	57	34		36	3	39	0.607143	0.545455	0.358974	10.19.17_01_27.20_av17_scrms	5.8.17_03_27.15_av17_scrm	5.8.17_03_27.15_av17_scrm.wav	0.708	2733	3952	0.106	0.149718	2733.9	4758.4	2024.5	3876.8	385.59	95.8	9.3e-06	1.96007	23.77	-0.73	2.4	4349.7	6158.5	7622.8
645	RAv17_06	99	N	1	2	1	1	0	2	521	19	F	English + Hindi	N			NA	Y	56	37		37	39	76	0.595238	0.30303	0.461538	10.19.17_01_27.20_av17_scrms	5.8.17_03_27.15_av17_scrm	5.8.17_03_27.15_av17_scrm.wav	0.708	2733	3952	0.106	0.149718	2733.9	4758.4	2024.5	3876.8	385.59	95.8	9.3e-06	1.96007	23.77	-0.73	2.4	4349.7	6158.5	7622.8
646	RAv17_06	67	N	1	4	36	1	1	1	250	18	F	English	N			NA	N	29	44		32	32	64	0.75	0.636364	0.564103	10.19.17_01_27.20_av17_scrms	5.8.17_03_27.15_av17_scrm	5.8.17_03_27.15_av17_scrm.wav	0.708	2733	3952	0.106	0.149718	2733.9	4758.4	2024.5	3876.8	385.59	95.8	9.3e-06	1.96007	23.77	-0.73	2.4	4349.7	6158.5	7622.8
647	RAv17_06	61	N	1	3	28	1	1	1	1425	19	M	English	N			NA	Y	42	36		43	35	78	0.619048	0.424242	0.461538	10.19.17_01_27.20_av17_scrms	5.8.17_03_27.15_av17_scrm	5.8.17_03_27.15_av17_scrm.wav	0.708	2733	3952	0.106	0.149718	2733.9	4758.4	2024.5	3876.8	385.59	95.8	9.3e-06	1.96007	23.77	-0.73	2.4	4349.7	6158.5	7622.8
648	RAv17_06	49	N	1	3	11	1	0	2	1331	18	F	English	N			NA	N	44	28		42	2	44	0.642857	0.454545	0.487179	10.19.17_01_27.20_av17_scrms	5.8.17_03_27.15_av17_scrm	5.8.17_03_27.15_av17_scrm.wav	0.708	2733	3952	0.106	0.149718	2733.9	4758.4	2024.5	3876.8	385.59	95.8	9.3e-06	1.96007	23.77	-0.73	2.4	4349.7	6158.5	7622.8
649	RAv17_06	511	Y	1	4	2	1	1	1	652	24	F	English	Y	Rhesus macaque, domestic cats	24	24	Y	NA	NA		NA	NA	NA	0.571429	0.69697	0.512821	10.19.17_01_27.20_av17_scrms	5.8.17_03_27.15_av17_scrm	5.8.17_03_27.15_av17_scrm.wav	0.708	2733	3952	0.106	0.149718	2733.9	4758.4	2024.5	3876.8	385.59	95.8	9.3e-06	1.96007	23.77	-0.73	2.4	4349.7	6158.5	7622.8
650	RAv17_06	35	N	1	4	34	1	1	1	478	19	M	English	N			NA	N	40	21		44	39	83	0.666667	0.818182	0.641026	10.19.17_01_27.20_av17_scrms	5.8.17_03_27.15_av17_scrm	5.8.17_03_27.15_av17_scrm.wav	0.708	2733	3952	0.106	0.149718	2733.9	4758.4	2024.5	3876.8	385.59	95.8	9.3e-06	1.96007	23.77	-0.73	2.4	4349.7	6158.5	7622.8
651	RAv17_06	17	N	1	4	8	1	1	1	585	19	F	Chinese	N			NA	Y	49	34		NA	NA	NA	0.595238	1	0.487179	10.19.17_01_27.20_av17_scrms	5.8.17_03_27.15_av17_scrm	5.8.17_03_27.15_av17_scrm.wav	0.708	2733	3952	0.106	0.149718	2733.9	4758.4	2024.5	3876.8	385.59	95.8	9.3e-06	1.96007	23.77	-0.73	2.4	4349.7	6158.5	7622.8
652	RAv17_06	89	N	1	2	34	1	0	2	854	18	F	Spanish	N			NA	Y	50	37		NA	NA	NA	0.619048	0.818182	0.589744	10.19.17_01_27.20_av17_scrms	5.8.17_03_27.15_av17_scrm	5.8.17_03_27.15_av17_scrm.wav	0.708	2733	3952	0.106	0.149718	2733.9	4758.4	2024.5	3876.8	385.59	95.8	9.3e-06	1.96007	23.77	-0.73	2.4	4349.7	6158.5	7622.8
653	RAv17_06	46	N	1	1	11	1	1	1	514	18	F	English	N			NA	Y	45	25		39	42	81	0.619048	0.515152	0.589744	10.19.17_01_27.20_av17_scrms	5.8.17_03_27.15_av17_scrm	5.8.17_03_27.15_av17_scrm.wav	0.708	2733	3952	0.106	0.149718	2733.9	4758.4	2024.5	3876.8	385.59	95.8	9.3e-06	1.96007	23.77	-0.73	2.4	4349.7	6158.5	7622.8
654	RAv17_06	12	N	1	1	4	1	1	1	606	21	M	Chinese	N			NA	Y	41	34		NA	NA	NA	0.642857	0.484848	0.410256	10.19.17_01_27.20_av17_scrms	5.8.17_03_27.15_av17_scrm	5.8.17_03_27.15_av17_scrm.wav	0.708	2733	3952	0.106	0.149718	2733.9	4758.4	2024.5	3876.8	385.59	95.8	9.3e-06	1.96007	23.77	-0.73	2.4	4349.7	6158.5	7622.8
655	RAv17_06	74	N	1	3	14	1	0	2	779	19	F	English	Y	cats, dogs	1	NA	Y	47	41		41	43	84	0.428571	0.272727	0.538462	10.19.17_01_27.20_av17_scrms	5.8.17_03_27.15_av17_scrm	5.8.17_03_27.15_av17_scrm.wav	0.708	2733	3952	0.106	0.149718	2733.9	4758.4	2024.5	3876.8	385.59	95.8	9.3e-06	1.96007	23.77	-0.73	2.4	4349.7	6158.5	7622.8
656	RAv17_06	77	N	1	4	20	1	0	2	296	19	M	Chinese	N			NA	Y	46	18		NA	NA	NA	0.595238	0.454545	0.538462	10.19.17_01_27.20_av17_scrms	5.8.17_03_27.15_av17_scrm	5.8.17_03_27.15_av17_scrm.wav	0.708	2733	3952	0.106	0.149718	2733.9	4758.4	2024.5	3876.8	385.59	95.8	9.3e-06	1.96007	23.77	-0.73	2.4	4349.7	6158.5	7622.8
657	RAv17_06	58	N	1	2	34	1	1	1	1018	21	F	Spanish	Y	mice, rats	2	NA	Y	53	33		NA	NA	NA	0.547619	0.515152	0.461538	10.19.17_01_27.20_av17_scrms	5.8.17_03_27.15_av17_scrm	5.8.17_03_27.15_av17_scrm.wav	0.708	2733	3952	0.106	0.149718	2733.9	4758.4	2024.5	3876.8	385.59	95.8	9.3e-06	1.96007	23.77	-0.73	2.4	4349.7	6158.5	7622.8
658	RAv17_06	20	Y	1	3	19	1	1	1	446	37	F	English	Y	Rhesus, chimpanzees, dogs, cats, mice, rats	180	132	Y	52	33		46	47	93	0.392857	0.454545	0.589744	10.19.17_01_27.20_av17_scrms	5.8.17_03_27.15_av17_scrm	5.8.17_03_27.15_av17_scrm.wav	0.708	2733	3952	0.106	0.149718	2733.9	4758.4	2024.5	3876.8	385.59	95.8	9.3e-06	1.96007	23.77	-0.73	2.4	4349.7	6158.5	7622.8
659	RAv17_06	33	N	1	3	13	1	1	1	666	19	F	Mandarin + English	N			NA	Y	56	33		NA	NA	NA	0.571429	0.272727	0.615385	10.19.17_01_27.20_av17_scrms	5.8.17_03_27.15_av17_scrm	5.8.17_03_27.15_av17_scrm.wav	0.708	2733	3952	0.106	0.149718	2733.9	4758.4	2024.5	3876.8	385.59	95.8	9.3e-06	1.96007	23.77	-0.73	2.4	4349.7	6158.5	7622.8
660	RAv17_06	36	N	1	2	18	1	0	2	556	19	F	English	Y	dogs, cats	4	NA	Y	53	31		42	42	84	0.416667	0.606061	0.435897	10.19.17_01_27.20_av17_scrms	5.8.17_03_27.15_av17_scrm	5.8.17_03_27.15_av17_scrm.wav	0.708	2733	3952	0.106	0.149718	2733.9	4758.4	2024.5	3876.8	385.59	95.8	9.3e-06	1.96007	23.77	-0.73	2.4	4349.7	6158.5	7622.8
661	RAv17_06	39	N	1	4	11	1	0	2	423	19	F	Spanish/English	N			NA	Y	55	38		41	43	84	0.583333	0.454545	0.538462	10.19.17_01_27.20_av17_scrms	5.8.17_03_27.15_av17_scrm	5.8.17_03_27.15_av17_scrm.wav	0.708	2733	3952	0.106	0.149718	2733.9	4758.4	2024.5	3876.8	385.59	95.8	9.3e-06	1.96007	23.77	-0.73	2.4	4349.7	6158.5	7622.8
662	RAv17_06	94	N	1	3	10	1	1	1	328	20	F	English	N			NA	Y	45	44		40	44	84	0.72619	0.878788	0.410256	10.19.17_01_27.20_av17_scrms	5.8.17_03_27.15_av17_scrm	5.8.17_03_27.15_av17_scrm.wav	0.708	2733	3952	0.106	0.149718	2733.9	4758.4	2024.5	3876.8	385.59	95.8	9.3e-06	1.96007	23.77	-0.73	2.4	4349.7	6158.5	7622.8
663	RAv17_06	69	N	1	1	15	1	1	1	631	20	F	English	N			NA	Y	40	37		42	43	85	0.547619	0.424242	0.615385	10.19.17_01_27.20_av17_scrms	5.8.17_03_27.15_av17_scrm	5.8.17_03_27.15_av17_scrm.wav	0.708	2733	3952	0.106	0.149718	2733.9	4758.4	2024.5	3876.8	385.59	95.8	9.3e-06	1.96007	23.77	-0.73	2.4	4349.7	6158.5	7622.8
664	RAv17_06	30	N	1	3	1	1	0	2	1007	19	F	Chinese	N			NA	N	43	31		NA	NA	NA	0.535714	0.151515	0.641026	10.19.17_01_27.20_av17_scrms	5.8.17_03_27.15_av17_scrm	5.8.17_03_27.15_av17_scrm.wav	0.708	2733	3952	0.106	0.149718	2733.9	4758.4	2024.5	3876.8	385.59	95.8	9.3e-06	1.96007	23.77	-0.73	2.4	4349.7	6158.5	7622.8
665	RAv17_06	106	N	1	3	30	1	1	1	406	18	F	Korean	N			NA	Y	53	39		NA	NA	NA	0.607143	0.606061	0.461538	10.19.17_01_27.20_av17_scrms	5.8.17_03_27.15_av17_scrm	5.8.17_03_27.15_av17_scrm.wav	0.708	2733	3952	0.106	0.149718	2733.9	4758.4	2024.5	3876.8	385.59	95.8	9.3e-06	1.96007	23.77	-0.73	2.4	4349.7	6158.5	7622.8
666	RAv17_06	40	N	1	1	17	1	1	1	247	19	F	Chinese	N			NA	N	39	39		NA	NA	NA	0.666667	0.515152	0.512821	10.19.17_01_27.20_av17_scrms	5.8.17_03_27.15_av17_scrm	5.8.17_03_27.15_av17_scrm.wav	0.708	2733	3952	0.106	0.149718	2733.9	4758.4	2024.5	3876.8	385.59	95.8	9.3e-06	1.96007	23.77	-0.73	2.4	4349.7	6158.5	7622.8
667	RAv17_06	81	N	1	2	36	1	0	2	1200	18	F	English	N			NA	Y	53	33		43	51	94	0.690476	0.454545	0.538462	10.19.17_01_27.20_av17_scrms	5.8.17_03_27.15_av17_scrm	5.8.17_03_27.15_av17_scrm.wav	0.708	2733	3952	0.106	0.149718	2733.9	4758.4	2024.5	3876.8	385.59	95.8	9.3e-06	1.96007	23.77	-0.73	2.4	4349.7	6158.5	7622.8
668	RAv17_06	509	Y	1	2	17	1	0	2	684	28	M	Spanish/English	Y	Rhesus macaque, mangabey	48	48	Y	NA	NA		NA	NA	NA	0.464286	0.969697	0.615385	10.19.17_01_27.20_av17_scrms	5.8.17_03_27.15_av17_scrm	5.8.17_03_27.15_av17_scrm.wav	0.708	2733	3952	0.106	0.149718	2733.9	4758.4	2024.5	3876.8	385.59	95.8	9.3e-06	1.96007	23.77	-0.73	2.4	4349.7	6158.5	7622.8
669	RAv17_06	68	N	1	4	20	1	0	2	1962	19	M	Spanish	N			NA	N	48	NA	didn't fill out this questionnaire animal	NA	NA	NA	0.607143	0.333333	0.641026	10.19.17_01_27.20_av17_scrms	5.8.17_03_27.15_av17_scrm	5.8.17_03_27.15_av17_scrm.wav	0.708	2733	3952	0.106	0.149718	2733.9	4758.4	2024.5	3876.8	385.59	95.8	9.3e-06	1.96007	23.77	-0.73	2.4	4349.7	6158.5	7622.8
670	RAv17_06	93	N	1	2	17	1	1	1	170	19	F	English	N			NA	Y	53	37		38	38	76	0.52381	0.30303	0.487179	10.19.17_01_27.20_av17_scrms	5.8.17_03_27.15_av17_scrm	5.8.17_03_27.15_av17_scrm.wav	0.708	2733	3952	0.106	0.149718	2733.9	4758.4	2024.5	3876.8	385.59	95.8	9.3e-06	1.96007	23.77	-0.73	2.4	4349.7	6158.5	7622.8
671	RAv17_06	31	N	1	2	9	1	0	2	983	18	F	English	N			NA	Y	47	35		38	40	78	0.583333	0.575758	0.384615	10.19.17_01_27.20_av17_scrms	5.8.17_03_27.15_av17_scrm	5.8.17_03_27.15_av17_scrm.wav	0.708	2733	3952	0.106	0.149718	2733.9	4758.4	2024.5	3876.8	385.59	95.8	9.3e-06	1.96007	23.77	-0.73	2.4	4349.7	6158.5	7622.8
672	RAv17_06	53	N	1	4	13	1	1	1	333	18	F	English	N			NA	N	71	47		22	17	39	0.642857	0.787879	0.641026	10.19.17_01_27.20_av17_scrms	5.8.17_03_27.15_av17_scrm	5.8.17_03_27.15_av17_scrm.wav	0.708	2733	3952	0.106	0.149718	2733.9	4758.4	2024.5	3876.8	385.59	95.8	9.3e-06	1.96007	23.77	-0.73	2.4	4349.7	6158.5	7622.8
673	RAv17_06	506	Y	1	3	17	1	1	1	401	37	F	English	Y	Rhesus macaque	120	120	Y	NA	NA		NA	NA	NA	0.559524	0.424242	0.487179	10.19.17_01_27.20_av17_scrms	5.8.17_03_27.15_av17_scrm	5.8.17_03_27.15_av17_scrm.wav	0.708	2733	3952	0.106	0.149718	2733.9	4758.4	2024.5	3876.8	385.59	95.8	9.3e-06	1.96007	23.77	-0.73	2.4	4349.7	6158.5	7622.8
674	RAv17_06	75	N	1	4	33	1	0	2	572	19	M	Chinese	Y	fruitfly, termites	1.5	NA	N	58	38		NA	NA	NA	0.547619	0.484848	0.461538	10.19.17_01_27.20_av17_scrms	5.8.17_03_27.15_av17_scrm	5.8.17_03_27.15_av17_scrm.wav	0.708	2733	3952	0.106	0.149718	2733.9	4758.4	2024.5	3876.8	385.59	95.8	9.3e-06	1.96007	23.77	-0.73	2.4	4349.7	6158.5	7622.8
675	RAv17_06	63	N	1	3	18	1	0	2	1324	19	F	English	N			NA	N	60	40		44	42	86	0.535714	0	0.717949	10.19.17_01_27.20_av17_scrms	5.8.17_03_27.15_av17_scrm	5.8.17_03_27.15_av17_scrm.wav	0.708	2733	3952	0.106	0.149718	2733.9	4758.4	2024.5	3876.8	385.59	95.8	9.3e-06	1.96007	23.77	-0.73	2.4	4349.7	6158.5	7622.8
676	RAv17_06	2	N	1	1	12	1	0	2	406	19	F	English	N			NA	Y	49	42		36	37	73	0.595238	0.0606061	0.641026	10.19.17_01_27.20_av17_scrms	5.8.17_03_27.15_av17_scrm	5.8.17_03_27.15_av17_scrm.wav	0.708	2733	3952	0.106	0.149718	2733.9	4758.4	2024.5	3876.8	385.59	95.8	9.3e-06	1.96007	23.77	-0.73	2.4	4349.7	6158.5	7622.8
677	RAv17_06	87	N	1	1	16	1	0	2	1471	19	F	Korean	N			NA	Y	53	41		NA	NA	NA	0.654762	0.787879	0.615385	10.19.17_01_27.20_av17_scrms	5.8.17_03_27.15_av17_scrm	5.8.17_03_27.15_av17_scrm.wav	0.708	2733	3952	0.106	0.149718	2733.9	4758.4	2024.5	3876.8	385.59	95.8	9.3e-06	1.96007	23.77	-0.73	2.4	4349.7	6158.5	7622.8
678	RAv17_06	11	N	1	2	26	1	1	1	3127	20	F	English (mainly) + Hindi	Y	dogs	6	NA	Y	66	45	noted w/ regard to coos that it is upsetting - sounds like they're in pain. Noted surpirse that screams would be more intense context than coos	34	41	75	0.666667	0.545455	0.641026	10.19.17_01_27.20_av17_scrms	5.8.17_03_27.15_av17_scrm	5.8.17_03_27.15_av17_scrm.wav	0.708	2733	3952	0.106	0.149718	2733.9	4758.4	2024.5	3876.8	385.59	95.8	9.3e-06	1.96007	23.77	-0.73	2.4	4349.7	6158.5	7622.8
679	RAv17_06	78	N	1	1	4	1	1	1	1192	20	M	Spanish	Y	dogs, snakes	2	NA	Y	45	35		NA	NA	NA	0.547619	0.424242	0.487179	10.19.17_01_27.20_av17_scrms	5.8.17_03_27.15_av17_scrm	5.8.17_03_27.15_av17_scrm.wav	0.708	2733	3952	0.106	0.149718	2733.9	4758.4	2024.5	3876.8	385.59	95.8	9.3e-06	1.96007	23.77	-0.73	2.4	4349.7	6158.5	7622.8
680	RAv17_06	24	N	1	4	7	1	0	2	352	20	M	English	N			NA	N	41	24		35	36	71	0.404762	0.363636	0.666667	10.19.17_01_27.20_av17_scrms	5.8.17_03_27.15_av17_scrm	5.8.17_03_27.15_av17_scrm.wav	0.708	2733	3952	0.106	0.149718	2733.9	4758.4	2024.5	3876.8	385.59	95.8	9.3e-06	1.96007	23.77	-0.73	2.4	4349.7	6158.5	7622.8
681	RAv17_06	112	N	1	3	15	1	0	2	2042	18	M	Turkish	N			NA	Y	55	40		NA	NA	NA	0.535714	0.424242	0.461538	10.19.17_01_27.20_av17_scrms	5.8.17_03_27.15_av17_scrm	5.8.17_03_27.15_av17_scrm.wav	0.708	2733	3952	0.106	0.149718	2733.9	4758.4	2024.5	3876.8	385.59	95.8	9.3e-06	1.96007	23.77	-0.73	2.4	4349.7	6158.5	7622.8
682	RAv17_06	59	N	1	2	33	1	0	2	278	18	M	Gujarati	N			NA	N	37	38		NA	NA	NA	0.52381	0.393939	0.666667	10.19.17_01_27.20_av17_scrms	5.8.17_03_27.15_av17_scrm	5.8.17_03_27.15_av17_scrm.wav	0.708	2733	3952	0.106	0.149718	2733.9	4758.4	2024.5	3876.8	385.59	95.8	9.3e-06	1.96007	23.77	-0.73	2.4	4349.7	6158.5	7622.8
683	RAv17_06	42	N	1	1	37	1	0	2	343	19	F	English	N			NA	N	35	28		44	44	88	0.571429	0.454545	0.692308	10.19.17_01_27.20_av17_scrms	5.8.17_03_27.15_av17_scrm	5.8.17_03_27.15_av17_scrm.wav	0.708	2733	3952	0.106	0.149718	2733.9	4758.4	2024.5	3876.8	385.59	95.8	9.3e-06	1.96007	23.77	-0.73	2.4	4349.7	6158.5	7622.8
684	RAv17_06	505	Y	1	3	26	1	1	1	1899	30	F	English	Y	Rhesus macaque, horses, dogs, cats, birds, mangabey	120	94	Y	NA	NA		NA	NA	NA	0.595238	1	0.589744	10.19.17_01_27.20_av17_scrms	5.8.17_03_27.15_av17_scrm	5.8.17_03_27.15_av17_scrm.wav	0.708	2733	3952	0.106	0.149718	2733.9	4758.4	2024.5	3876.8	385.59	95.8	9.3e-06	1.96007	23.77	-0.73	2.4	4349.7	6158.5	7622.8
685	RAv17_06	28	N	1	3	30	1	1	1	327	40	F	English	N			NA	Y	50	33		42	NA	NA	0.630952	0.606061	0.564103	10.19.17_01_27.20_av17_scrms	5.8.17_03_27.15_av17_scrm	5.8.17_03_27.15_av17_scrm.wav	0.708	2733	3952	0.106	0.149718	2733.9	4758.4	2024.5	3876.8	385.59	95.8	9.3e-06	1.96007	23.77	-0.73	2.4	4349.7	6158.5	7622.8
686	RAv17_06	107	N	1	2	12	1	0	2	4114	22	F	Chinese	N			NA	N	21	37		NA	NA	NA	0.595238	0.424242	0.435897	10.19.17_01_27.20_av17_scrms	5.8.17_03_27.15_av17_scrm	5.8.17_03_27.15_av17_scrm.wav	0.708	2733	3952	0.106	0.149718	2733.9	4758.4	2024.5	3876.8	385.59	95.8	9.3e-06	1.96007	23.77	-0.73	2.4	4349.7	6158.5	7622.8
687	RAv17_06	96	N	1	4	39	1	0	2	1634	18	F	English	N			NA	Y	59	39		44	47	91	0.583333	0.727273	0.512821	10.19.17_01_27.20_av17_scrms	5.8.17_03_27.15_av17_scrm	5.8.17_03_27.15_av17_scrm.wav	0.708	2733	3952	0.106	0.149718	2733.9	4758.4	2024.5	3876.8	385.59	95.8	9.3e-06	1.96007	23.77	-0.73	2.4	4349.7	6158.5	7622.8
688	RAv17_06	19	N	1	4	7	1	1	1	559	51	F	English	Y	mice	240	NA	Y	36	29		43	47	90	0.511905	0.575758	0.487179	10.19.17_01_27.20_av17_scrms	5.8.17_03_27.15_av17_scrm	5.8.17_03_27.15_av17_scrm.wav	0.708	2733	3952	0.106	0.149718	2733.9	4758.4	2024.5	3876.8	385.59	95.8	9.3e-06	1.96007	23.77	-0.73	2.4	4349.7	6158.5	7622.8
689	RAv17_06	512	Y	1	1	3	1	0	2	693	39	M	English	Y	Rhesus macaque, pigtail macaque, common chimpanzee, west lowland gorilla, Sooty mangabey	144	144	Y	NA	NA	occasionally needed to answer radio during task	NA	NA	NA	0.642857	1	0.589744	10.19.17_01_27.20_av17_scrms	5.8.17_03_27.15_av17_scrm	5.8.17_03_27.15_av17_scrm.wav	0.708	2733	3952	0.106	0.149718	2733.9	4758.4	2024.5	3876.8	385.59	95.8	9.3e-06	1.96007	23.77	-0.73	2.4	4349.7	6158.5	7622.8
690	RAv17_06	21	N	1	2	12	1	1	1	520	20	F	English	Y	dogs	6	NA	Y	44	37		41	34	75	0.630952	0.787879	0.384615	10.19.17_01_27.20_av17_scrms	5.8.17_03_27.15_av17_scrm	5.8.17_03_27.15_av17_scrm.wav	0.708	2733	3952	0.106	0.149718	2733.9	4758.4	2024.5	3876.8	385.59	95.8	9.3e-06	1.96007	23.77	-0.73	2.4	4349.7	6158.5	7622.8
691	RAv17_06	8	N	1	3	35	1	0	2	387	19	F	English	Y	dogs, cats	24	NA	Y	58	40		39	43	82	0.595238	0.363636	0.589744	10.19.17_01_27.20_av17_scrms	5.8.17_03_27.15_av17_scrm	5.8.17_03_27.15_av17_scrm.wav	0.708	2733	3952	0.106	0.149718	2733.9	4758.4	2024.5	3876.8	385.59	95.8	9.3e-06	1.96007	23.77	-0.73	2.4	4349.7	6158.5	7622.8
692	RAv17_06	62	N	1	1	34	1	1	1	245	18	F	English	Y	mice	1	NA	Y	59	32		46	40	86	0.559524	0.484848	0.538462	10.19.17_01_27.20_av17_scrms	5.8.17_03_27.15_av17_scrm	5.8.17_03_27.15_av17_scrm.wav	0.708	2733	3952	0.106	0.149718	2733.9	4758.4	2024.5	3876.8	385.59	95.8	9.3e-06	1.96007	23.77	-0.73	2.4	4349.7	6158.5	7622.8
693	RAv17_06	55	N	1	1	23	1	0	2	753	18	F	Mandarin	N			NA	Y	64	30		NA	NA	NA	0.690476	0.515152	0.410256	10.19.17_01_27.20_av17_scrms	5.8.17_03_27.15_av17_scrm	5.8.17_03_27.15_av17_scrm.wav	0.708	2733	3952	0.106	0.149718	2733.9	4758.4	2024.5	3876.8	385.59	95.8	9.3e-06	1.96007	23.77	-0.73	2.4	4349.7	6158.5	7622.8
694	RAv17_06	22	N	1	4	31	1	1	1	1133	31	F	English	Y	dogs, cats	6	NA	Y	56	49		47	46	93	0.452381	0.515152	0.692308	10.19.17_01_27.20_av17_scrms	5.8.17_03_27.15_av17_scrm	5.8.17_03_27.15_av17_scrm.wav	0.708	2733	3952	0.106	0.149718	2733.9	4758.4	2024.5	3876.8	385.59	95.8	9.3e-06	1.96007	23.77	-0.73	2.4	4349.7	6158.5	7622.8
695	RAv17_06	16	N	1	2	22	1	0	2	534	21	F	English	Y	dogs, cats	6	NA	Y	44	43		38	40	78	0.559524	0.545455	0.461538	10.19.17_01_27.20_av17_scrms	5.8.17_03_27.15_av17_scrm	5.8.17_03_27.15_av17_scrm.wav	0.708	2733	3952	0.106	0.149718	2733.9	4758.4	2024.5	3876.8	385.59	95.8	9.3e-06	1.96007	23.77	-0.73	2.4	4349.7	6158.5	7622.8
696	RAv17_06	115	N	1	1	36	1	0	2	482	18	M	Mandarin	N			NA	N	31	37		NA	NA	NA	0.583333	0.575758	0.461538	10.19.17_01_27.20_av17_scrms	5.8.17_03_27.15_av17_scrm	5.8.17_03_27.15_av17_scrm.wav	0.708	2733	3952	0.106	0.149718	2733.9	4758.4	2024.5	3876.8	385.59	95.8	9.3e-06	1.96007	23.77	-0.73	2.4	4349.7	6158.5	7622.8
697	RAv17_06	25	N	1	4	25	1	0	2	619	21	M	English	N			NA	N	56	32		34	41	75	0.5	0.575758	0.461538	10.19.17_01_27.20_av17_scrms	5.8.17_03_27.15_av17_scrm	5.8.17_03_27.15_av17_scrm.wav	0.708	2733	3952	0.106	0.149718	2733.9	4758.4	2024.5	3876.8	385.59	95.8	9.3e-06	1.96007	23.77	-0.73	2.4	4349.7	6158.5	7622.8
698	RAv17_06	92	N	1	3	16	1	1	1	405	18	F	English	N			NA	Y	45	30		36	36	72	0.595238	0.212121	0.589744	10.19.17_01_27.20_av17_scrms	5.8.17_03_27.15_av17_scrm	5.8.17_03_27.15_av17_scrm.wav	0.708	2733	3952	0.106	0.149718	2733.9	4758.4	2024.5	3876.8	385.59	95.8	9.3e-06	1.96007	23.77	-0.73	2.4	4349.7	6158.5	7622.8
699	RAv17_06	57	N	1	2	30	1	1	1	265	20	F	English	N			NA	N	29	31		27	41	68	0.547619	0.333333	0.538462	10.19.17_01_27.20_av17_scrms	5.8.17_03_27.15_av17_scrm	5.8.17_03_27.15_av17_scrm.wav	0.708	2733	3952	0.106	0.149718	2733.9	4758.4	2024.5	3876.8	385.59	95.8	9.3e-06	1.96007	23.77	-0.73	2.4	4349.7	6158.5	7622.8
700	RAv17_06	37	N	1	4	19	1	1	1	1647	19	F	Spanish	N			NA	Y	44	32		NA	NA	NA	0.52381	0.606061	0.641026	10.19.17_01_27.20_av17_scrms	5.8.17_03_27.15_av17_scrm	5.8.17_03_27.15_av17_scrm.wav	0.708	2733	3952	0.106	0.149718	2733.9	4758.4	2024.5	3876.8	385.59	95.8	9.3e-06	1.96007	23.77	-0.73	2.4	4349.7	6158.5	7622.8
701	RAv17_06	47	N	1	1	20	1	0	2	211	18	F	English	N			NA	Y	60	42		42	45	87	0.47619	0.30303	0.333333	10.19.17_01_27.20_av17_scrms	5.8.17_03_27.15_av17_scrm	5.8.17_03_27.15_av17_scrm.wav	0.708	2733	3952	0.106	0.149718	2733.9	4758.4	2024.5	3876.8	385.59	95.8	9.3e-06	1.96007	23.77	-0.73	2.4	4349.7	6158.5	7622.8
702	RAv17_06	48	N	1	3	34	1	1	1	1308	19	F	English	N			NA	Y	33	36		36	46	82	0.654762	0.606061	0.564103	10.19.17_01_27.20_av17_scrms	5.8.17_03_27.15_av17_scrm	5.8.17_03_27.15_av17_scrm.wav	0.708	2733	3952	0.106	0.149718	2733.9	4758.4	2024.5	3876.8	385.59	95.8	9.3e-06	1.96007	23.77	-0.73	2.4	4349.7	6158.5	7622.8
703	RAv17_06	13	N	1	3	14	1	1	1	824	19	F	English	N			NA	N	21	34		42	41	83	0.5	0.666667	0.487179	10.19.17_01_27.20_av17_scrms	5.8.17_03_27.15_av17_scrm	5.8.17_03_27.15_av17_scrm.wav	0.708	2733	3952	0.106	0.149718	2733.9	4758.4	2024.5	3876.8	385.59	95.8	9.3e-06	1.96007	23.77	-0.73	2.4	4349.7	6158.5	7622.8
704	RAv17_06	97	N	1	3	17	1	1	1	699	19	F	English	N			NA	Y	48	28		40	43	83	0.595238	0.606061	0.487179	10.19.17_01_27.20_av17_scrms	5.8.17_03_27.15_av17_scrm	5.8.17_03_27.15_av17_scrm.wav	0.708	2733	3952	0.106	0.149718	2733.9	4758.4	2024.5	3876.8	385.59	95.8	9.3e-06	1.96007	23.77	-0.73	2.4	4349.7	6158.5	7622.8
705	RAv17_06	51	N	1	3	30	1	1	1	347	18	F	English	N			NA	Y	31	36		45	44	89	0.654762	0.515152	0.615385	10.19.17_01_27.20_av17_scrms	5.8.17_03_27.15_av17_scrm	5.8.17_03_27.15_av17_scrm.wav	0.708	2733	3952	0.106	0.149718	2733.9	4758.4	2024.5	3876.8	385.59	95.8	9.3e-06	1.96007	23.77	-0.73	2.4	4349.7	6158.5	7622.8
706	RAv17_06	79	N	1	2	31	1	0	2	271	21	M	English	N			NA	Y	55	38		33	34	67	0.571429	0.393939	0.564103	10.19.17_01_27.20_av17_scrms	5.8.17_03_27.15_av17_scrm	5.8.17_03_27.15_av17_scrm.wav	0.708	2733	3952	0.106	0.149718	2733.9	4758.4	2024.5	3876.8	385.59	95.8	9.3e-06	1.96007	23.77	-0.73	2.4	4349.7	6158.5	7622.8
707	RAv17_06	82	N	1	1	10	1	1	1	790	18	F	Korean	Y	dogs, cats	3	NA	Y	31	40		NA	NA	NA	0.559524	0.333333	0.641026	10.19.17_01_27.20_av17_scrms	5.8.17_03_27.15_av17_scrm	5.8.17_03_27.15_av17_scrm.wav	0.708	2733	3952	0.106	0.149718	2733.9	4758.4	2024.5	3876.8	385.59	95.8	9.3e-06	1.96007	23.77	-0.73	2.4	4349.7	6158.5	7622.8
708	RAv17_06	110	N	1	4	12	1	0	2	825	19	M	English	N			NA	Y	40	32		35	38	73	0.511905	0.69697	0.564103	10.19.17_01_27.20_av17_scrms	5.8.17_03_27.15_av17_scrm	5.8.17_03_27.15_av17_scrm.wav	0.708	2733	3952	0.106	0.149718	2733.9	4758.4	2024.5	3876.8	385.59	95.8	9.3e-06	1.96007	23.77	-0.73	2.4	4349.7	6158.5	7622.8
709	RAv17_06	60	N	1	1	8	1	1	1	286	18	F	Chinese	N			NA	Y	54	33		NA	NA	NA	0.595238	0.69697	0.615385	10.19.17_01_27.20_av17_scrms	5.8.17_03_27.15_av17_scrm	5.8.17_03_27.15_av17_scrm.wav	0.708	2733	3952	0.106	0.149718	2733.9	4758.4	2024.5	3876.8	385.59	95.8	9.3e-06	1.96007	23.77	-0.73	2.4	4349.7	6158.5	7622.8
710	RAv17_06	3	N	1	1	7	1	0	2	826	28	M	English	N			NA	Y	39	30		45	42	87	0.559524	0.575758	0.487179	10.19.17_01_27.20_av17_scrms	5.8.17_03_27.15_av17_scrm	5.8.17_03_27.15_av17_scrm.wav	0.708	2733	3952	0.106	0.149718	2733.9	4758.4	2024.5	3876.8	385.59	95.8	9.3e-06	1.96007	23.77	-0.73	2.4	4349.7	6158.5	7622.8
711	RAv17_06	9	N	1	2	29	1	0	2	1661	19	M	English	Y	dogs, cats	3	NA	Y	41	31		35	32	67	0.416667	0.121212	0.435897	10.19.17_01_27.20_av17_scrms	5.8.17_03_27.15_av17_scrm	5.8.17_03_27.15_av17_scrm.wav	0.708	2733	3952	0.106	0.149718	2733.9	4758.4	2024.5	3876.8	385.59	95.8	9.3e-06	1.96007	23.77	-0.73	2.4	4349.7	6158.5	7622.8
712	RAv17_06	43	N	1	1	25	1	1	1	364	19	M	English	N			NA	Y	37	39		36	40	76	0.595238	0.666667	0.589744	10.19.17_01_27.20_av17_scrms	5.8.17_03_27.15_av17_scrm	5.8.17_03_27.15_av17_scrm.wav	0.708	2733	3952	0.106	0.149718	2733.9	4758.4	2024.5	3876.8	385.59	95.8	9.3e-06	1.96007	23.77	-0.73	2.4	4349.7	6158.5	7622.8
713	RAv17_06	83	N	1	4	2	1	1	1	1868	19	F	English	N			NA	Y	55	46		48	46	94	0.5	0.333333	0.487179	10.19.17_01_27.20_av17_scrms	5.8.17_03_27.15_av17_scrm	5.8.17_03_27.15_av17_scrm.wav	0.708	2733	3952	0.106	0.149718	2733.9	4758.4	2024.5	3876.8	385.59	95.8	9.3e-06	1.96007	23.77	-0.73	2.4	4349.7	6158.5	7622.8
714	RAv17_06	502	Y	1	4	16	1	1	1	843	39	F	English	Y	Rhesus, pigrails, gorillas, orangutans, lemurs	216	204	Y	63	30		45	43	88	0.642857	0.909091	0.666667	10.19.17_01_27.20_av17_scrms	5.8.17_03_27.15_av17_scrm	5.8.17_03_27.15_av17_scrm.wav	0.708	2733	3952	0.106	0.149718	2733.9	4758.4	2024.5	3876.8	385.59	95.8	9.3e-06	1.96007	23.77	-0.73	2.4	4349.7	6158.5	7622.8
715	RAv17_06	54	N	1	3	1	1	0	2	583	18	F	Chinese	N			NA	N	35	41		NA	NA	NA	0.535714	0.424242	0.538462	10.19.17_01_27.20_av17_scrms	5.8.17_03_27.15_av17_scrm	5.8.17_03_27.15_av17_scrm.wav	0.708	2733	3952	0.106	0.149718	2733.9	4758.4	2024.5	3876.8	385.59	95.8	9.3e-06	1.96007	23.77	-0.73	2.4	4349.7	6158.5	7622.8
716	RAv17_06	88	N	1	2	16	1	1	1	629	19	M	Mandarin	N			NA	Y	49	27		NA	NA	NA	0.547619	0.818182	0.538462	10.19.17_01_27.20_av17_scrms	5.8.17_03_27.15_av17_scrm	5.8.17_03_27.15_av17_scrm.wav	0.708	2733	3952	0.106	0.149718	2733.9	4758.4	2024.5	3876.8	385.59	95.8	9.3e-06	1.96007	23.77	-0.73	2.4	4349.7	6158.5	7622.8
717	RAv17_06	6	N	1	2	17	1	1	1	493	23	M	English	Y	mice	3	NA	Y	31	28		38	41	79	0.595238	0.484848	0.589744	10.19.17_01_27.20_av17_scrms	5.8.17_03_27.15_av17_scrm	5.8.17_03_27.15_av17_scrm.wav	0.708	2733	3952	0.106	0.149718	2733.9	4758.4	2024.5	3876.8	385.59	95.8	9.3e-06	1.96007	23.77	-0.73	2.4	4349.7	6158.5	7622.8
718	RAv17_06	15	N	1	2	32	1	0	2	1487	20	F	English and Chinese	N			NA	Y	58	36	didn't make it to face - just voice	NA	36	NA	0.488095	0.393939	0.461538	10.19.17_01_27.20_av17_scrms	5.8.17_03_27.15_av17_scrm	5.8.17_03_27.15_av17_scrm.wav	0.708	2733	3952	0.106	0.149718	2733.9	4758.4	2024.5	3876.8	385.59	95.8	9.3e-06	1.96007	23.77	-0.73	2.4	4349.7	6158.5	7622.8
719	RAv17_06	18	N	1	1	37	1	1	1	1772	20	F	English	N			NA	Y	44	35		32	42	74	0.571429	0.151515	0.333333	10.19.17_01_27.20_av17_scrms	5.8.17_03_27.15_av17_scrm	5.8.17_03_27.15_av17_scrm.wav	0.708	2733	3952	0.106	0.149718	2733.9	4758.4	2024.5	3876.8	385.59	95.8	9.3e-06	1.96007	23.77	-0.73	2.4	4349.7	6158.5	7622.8
720	RAv17_06	34	N	1	1	7	1	0	2	960	24	M	Mandarin	N			NA	N	15	37		NA	NA	NA	0.511905	0.757576	0.282051	10.19.17_01_27.20_av17_scrms	5.8.17_03_27.15_av17_scrm	5.8.17_03_27.15_av17_scrm.wav	0.708	2733	3952	0.106	0.149718	2733.9	4758.4	2024.5	3876.8	385.59	95.8	9.3e-06	1.96007	23.77	-0.73	2.4	4349.7	6158.5	7622.8
721	RAv17_06	27	N	1	1	37	1	0	2	137	23	F	Telugu	N			NA	N	32	44		NA	NA	NA	0.547619	0.151515	0.512821	10.19.17_01_27.20_av17_scrms	5.8.17_03_27.15_av17_scrm	5.8.17_03_27.15_av17_scrm.wav	0.708	2733	3952	0.106	0.149718	2733.9	4758.4	2024.5	3876.8	385.59	95.8	9.3e-06	1.96007	23.77	-0.73	2.4	4349.7	6158.5	7622.8
722	RAv17_06	501	Y	1	1	36	1	0	2	285	26	M	English	Y	lemurs (black white ruffed, ringtail, red bellied, crown, mongoose), Rhesus monkeys, gorillas, orangutans	Lemur: 24, Rh: 48, Gorilla: 12, Orangutan: 12	48	Y	47	37		46	44	90	0.559524	0.69697	0.461538	10.19.17_01_27.20_av17_scrms	5.8.17_03_27.15_av17_scrm	5.8.17_03_27.15_av17_scrm.wav	0.708	2733	3952	0.106	0.149718	2733.9	4758.4	2024.5	3876.8	385.59	95.8	9.3e-06	1.96007	23.77	-0.73	2.4	4349.7	6158.5	7622.8
723	RAv17_06	103	N	1	1	3	1	0	2	439	19	F	Korean + English	Y	dogs, cats	3	NA	Y	47	39		40	41	81	0.52381	0.393939	0.512821	10.19.17_01_27.20_av17_scrms	5.8.17_03_27.15_av17_scrm	5.8.17_03_27.15_av17_scrm.wav	0.708	2733	3952	0.106	0.149718	2733.9	4758.4	2024.5	3876.8	385.59	95.8	9.3e-06	1.96007	23.77	-0.73	2.4	4349.7	6158.5	7622.8
724	RAv17_06	100	N	1	4	13	1	1	1	1945	21	F	Mandarin	N			NA	Y	50	36		NA	NA	NA	0.619048	0.424242	0.641026	10.19.17_01_27.20_av17_scrms	5.8.17_03_27.15_av17_scrm	5.8.17_03_27.15_av17_scrm.wav	0.708	2733	3952	0.106	0.149718	2733.9	4758.4	2024.5	3876.8	385.59	95.8	9.3e-06	1.96007	23.77	-0.73	2.4	4349.7	6158.5	7622.8
725	RAv17_06	71	N	1	1	37	1	0	2	1264	19	M	English	N			NA	Y	44	36		43	43	86	0.595238	0.424242	0.333333	10.19.17_01_27.20_av17_scrms	5.8.17_03_27.15_av17_scrm	5.8.17_03_27.15_av17_scrm.wav	0.708	2733	3952	0.106	0.149718	2733.9	4758.4	2024.5	3876.8	385.59	95.8	9.3e-06	1.96007	23.77	-0.73	2.4	4349.7	6158.5	7622.8
726	RAv17_06	90	N	1	4	25	1	0	2	1468	21	M	English	N			NA	N	43	24		42	42	84	0.52381	0.69697	0.641026	10.19.17_01_27.20_av17_scrms	5.8.17_03_27.15_av17_scrm	5.8.17_03_27.15_av17_scrm.wav	0.708	2733	3952	0.106	0.149718	2733.9	4758.4	2024.5	3876.8	385.59	95.8	9.3e-06	1.96007	23.77	-0.73	2.4	4349.7	6158.5	7622.8
727	RAv17_06	113	N	1	1	26	1	0	2	2079	18	F	English	N			NA	Y	52	38		47	41	88	0.583333	0.848485	0.564103	10.19.17_01_27.20_av17_scrms	5.8.17_03_27.15_av17_scrm	5.8.17_03_27.15_av17_scrm.wav	0.708	2733	3952	0.106	0.149718	2733.9	4758.4	2024.5	3876.8	385.59	95.8	9.3e-06	1.96007	23.77	-0.73	2.4	4349.7	6158.5	7622.8
728	RAv17_06	98	N	1	1	6	1	0	2	641	18	F	English	N			NA	Y	36	39		37	48	85	0.690476	0.393939	0.538462	10.19.17_01_27.20_av17_scrms	5.8.17_03_27.15_av17_scrm	5.8.17_03_27.15_av17_scrm.wav	0.708	2733	3952	0.106	0.149718	2733.9	4758.4	2024.5	3876.8	385.59	95.8	9.3e-06	1.96007	23.77	-0.73	2.4	4349.7	6158.5	7622.8
729	RAv17_06	41	N	1	2	1	1	0	2	502	20	M	Vietnamese	N			NA	Y	45	29		NA	NA	NA	0.630952	0.454545	0.435897	10.19.17_01_27.20_av17_scrms	5.8.17_03_27.15_av17_scrm	5.8.17_03_27.15_av17_scrm.wav	0.708	2733	3952	0.106	0.149718	2733.9	4758.4	2024.5	3876.8	385.59	95.8	9.3e-06	1.96007	23.77	-0.73	2.4	4349.7	6158.5	7622.8
730	RAv17_06	70	N	1	1	3	1	1	1	1536	18	F	English	N			NA	Y	62	34		48	45	93	0.52381	0.242424	0.384615	10.19.17_01_27.20_av17_scrms	5.8.17_03_27.15_av17_scrm	5.8.17_03_27.15_av17_scrm.wav	0.708	2733	3952	0.106	0.149718	2733.9	4758.4	2024.5	3876.8	385.59	95.8	9.3e-06	1.96007	23.77	-0.73	2.4	4349.7	6158.5	7622.8
731	RAv17_06	50	N	1	3	28	1	0	2	58	19	F	English	Y	dogs, cats	12	NA	Y	53	40		24	19	43	0.5	0.212121	0.512821	10.19.17_01_27.20_av17_scrms	5.8.17_03_27.15_av17_scrm	5.8.17_03_27.15_av17_scrm.wav	0.708	2733	3952	0.106	0.149718	2733.9	4758.4	2024.5	3876.8	385.59	95.8	9.3e-06	1.96007	23.77	-0.73	2.4	4349.7	6158.5	7622.8
732	RAv17_06	109	N	1	2	25	1	1	1	378	20	F	English	N			NA	Y	41	33		45	43	88	0.666667	0.727273	0.384615	10.19.17_01_27.20_av17_scrms	5.8.17_03_27.15_av17_scrm	5.8.17_03_27.15_av17_scrm.wav	0.708	2733	3952	0.106	0.149718	2733.9	4758.4	2024.5	3876.8	385.59	95.8	9.3e-06	1.96007	23.77	-0.73	2.4	4349.7	6158.5	7622.8
733	RAv17_06	64	N	1	2	23	1	1	1	2221	18	F	English	N			NA	N	55	36		40	42	82	0.654762	0.393939	0.666667	10.19.17_01_27.20_av17_scrms	5.8.17_03_27.15_av17_scrm	5.8.17_03_27.15_av17_scrm.wav	0.708	2733	3952	0.106	0.149718	2733.9	4758.4	2024.5	3876.8	385.59	95.8	9.3e-06	1.96007	23.77	-0.73	2.4	4349.7	6158.5	7622.8
734	RAv17_06	104	N	1	2	27	1	0	2	747	19	F	Bangla	N			NA	N	49	31		NA	NA	NA	0.619048	0.363636	0.384615	10.19.17_01_27.20_av17_scrms	5.8.17_03_27.15_av17_scrm	5.8.17_03_27.15_av17_scrm.wav	0.708	2733	3952	0.106	0.149718	2733.9	4758.4	2024.5	3876.8	385.59	95.8	9.3e-06	1.96007	23.77	-0.73	2.4	4349.7	6158.5	7622.8
735	RAv17_06	508	Y	1	1	17	1	1	1	687	40	F	English	Y	Rhesus macaque, pigtail macaque, sooty mangabey	192	120	Y	NA	NA		NA	NA	NA	0.511905	0.969697	0.641026	10.19.17_01_27.20_av17_scrms	5.8.17_03_27.15_av17_scrm	5.8.17_03_27.15_av17_scrm.wav	0.708	2733	3952	0.106	0.149718	2733.9	4758.4	2024.5	3876.8	385.59	95.8	9.3e-06	1.96007	23.77	-0.73	2.4	4349.7	6158.5	7622.8
736	RAv17_06	4	N	1	2	2	1	0	2	911	20	M	English	N			NA	N	43	38		27	24	51	0.559524	0.424242	0.589744	10.19.17_01_27.20_av17_scrms	5.8.17_03_27.15_av17_scrm	5.8.17_03_27.15_av17_scrm.wav	0.708	2733	3952	0.106	0.149718	2733.9	4758.4	2024.5	3876.8	385.59	95.8	9.3e-06	1.96007	23.77	-0.73	2.4	4349.7	6158.5	7622.8
737	RAv17_06	14	N	1	4	22	1	1	1	2243	19	M	English and Mandarin	N			NA	N	43	35		32	39	71	0.642857	0.818182	0.615385	10.19.17_01_27.20_av17_scrms	5.8.17_03_27.15_av17_scrm	5.8.17_03_27.15_av17_scrm.wav	0.708	2733	3952	0.106	0.149718	2733.9	4758.4	2024.5	3876.8	385.59	95.8	9.3e-06	1.96007	23.77	-0.73	2.4	4349.7	6158.5	7622.8
738	RAv17_06	91	N	1	4	13	1	1	1	1047	20	F	Chinese	N			NA	N	49	36		NA	NA	NA	0.547619	0.606061	0.641026	10.19.17_01_27.20_av17_scrms	5.8.17_03_27.15_av17_scrm	5.8.17_03_27.15_av17_scrm.wav	0.708	2733	3952	0.106	0.149718	2733.9	4758.4	2024.5	3876.8	385.59	95.8	9.3e-06	1.96007	23.77	-0.73	2.4	4349.7	6158.5	7622.8
739	RAv17_06	66	N	1	1	22	1	1	1	737	20	M	Chinese	N			NA	N	41	38		NA	NA	NA	0.47619	0.69697	0.512821	10.19.17_01_27.20_av17_scrms	5.8.17_03_27.15_av17_scrm	5.8.17_03_27.15_av17_scrm.wav	0.708	2733	3952	0.106	0.149718	2733.9	4758.4	2024.5	3876.8	385.59	95.8	9.3e-06	1.96007	23.77	-0.73	2.4	4349.7	6158.5	7622.8
740	RAv17_06	65	N	1	4	26	1	1	1	321	20	F	Arabic	Y			NA	N	36	35		NA	NA	NA	0.559524	0.363636	0.564103	10.19.17_01_27.20_av17_scrms	5.8.17_03_27.15_av17_scrm	5.8.17_03_27.15_av17_scrm.wav	0.708	2733	3952	0.106	0.149718	2733.9	4758.4	2024.5	3876.8	385.59	95.8	9.3e-06	1.96007	23.77	-0.73	2.4	4349.7	6158.5	7622.8
741	RAv17_06	102	N	1	3	37	1	0	2	657	18	F	English	Y	elephants, dogs, tortoises	3	NA	Y	46	44		33	36	69	0.559524	0.424242	0.461538	10.19.17_01_27.20_av17_scrms	5.8.17_03_27.15_av17_scrm	5.8.17_03_27.15_av17_scrm.wav	0.708	2733	3952	0.106	0.149718	2733.9	4758.4	2024.5	3876.8	385.59	95.8	9.3e-06	1.96007	23.77	-0.73	2.4	4349.7	6158.5	7622.8
742	RAv17_06	513	Y	1	3	19	1	0	2	1414	53	F	English	Y	chimps, bonobos, Rhesus macaque, Sooty mangabeys, pigtail macaque, gibbons, orangutan, stumptail macaques, baboons	288	288	Y	NA	NA		NA	NA	NA	0.535714	0.969697	0.589744	10.19.17_01_27.20_av17_scrms	5.8.17_03_27.15_av17_scrm	5.8.17_03_27.15_av17_scrm.wav	0.708	2733	3952	0.106	0.149718	2733.9	4758.4	2024.5	3876.8	385.59	95.8	9.3e-06	1.96007	23.77	-0.73	2.4	4349.7	6158.5	7622.8
743	RAv17_06	108	N	1	4	16	1	0	2	661	19	M	English	N			NA	N	59	24		45	43	88	0.571429	0.393939	0.435897	10.19.17_01_27.20_av17_scrms	5.8.17_03_27.15_av17_scrm	5.8.17_03_27.15_av17_scrm.wav	0.708	2733	3952	0.106	0.149718	2733.9	4758.4	2024.5	3876.8	385.59	95.8	9.3e-06	1.96007	23.77	-0.73	2.4	4349.7	6158.5	7622.8
744	RAv17_06	32	N	1	3	28	1	1	1	526	23	F	English	N			NA	N	58	26		34	33	67	0.559524	0.424242	0.435897	10.19.17_01_27.20_av17_scrms	5.8.17_03_27.15_av17_scrm	5.8.17_03_27.15_av17_scrm.wav	0.708	2733	3952	0.106	0.149718	2733.9	4758.4	2024.5	3876.8	385.59	95.8	9.3e-06	1.96007	23.77	-0.73	2.4	4349.7	6158.5	7622.8
745	RAv17_06	44	N	1	4	22	1	1	1	618	31	F	English	N			NA	Y	39	34		47	45	92	0.571429	0.606061	0.333333	10.19.17_01_27.20_av17_scrms	5.8.17_03_27.15_av17_scrm	5.8.17_03_27.15_av17_scrm.wav	0.708	2733	3952	0.106	0.149718	2733.9	4758.4	2024.5	3876.8	385.59	95.8	9.3e-06	1.96007	23.77	-0.73	2.4	4349.7	6158.5	7622.8
746	RAv17_06	56	N	1	1	34	1	1	1	562	18	F	Chinese	N			NA	Y	31	30		NA	NA	NA	0.595238	0.575758	0.384615	10.19.17_01_27.20_av17_scrms	5.8.17_03_27.15_av17_scrm	5.8.17_03_27.15_av17_scrm.wav	0.708	2733	3952	0.106	0.149718	2733.9	4758.4	2024.5	3876.8	385.59	95.8	9.3e-06	1.96007	23.77	-0.73	2.4	4349.7	6158.5	7622.8
747	RAv17_06	84	N	1	1	38	1	0	2	286	19	F	English	N			NA	Y	34	36		35	37	72	0.547619	0.575758	0.512821	10.19.17_01_27.20_av17_scrms	5.8.17_03_27.15_av17_scrm	5.8.17_03_27.15_av17_scrm.wav	0.708	2733	3952	0.106	0.149718	2733.9	4758.4	2024.5	3876.8	385.59	95.8	9.3e-06	1.96007	23.77	-0.73	2.4	4349.7	6158.5	7622.8
748	RAv17_06	85	N	1	2	23	1	0	2	2324	19	F	Chinese	N			NA	Y	25	32		NA	NA	NA	0.571429	0.363636	0.435897	10.19.17_01_27.20_av17_scrms	5.8.17_03_27.15_av17_scrm	5.8.17_03_27.15_av17_scrm.wav	0.708	2733	3952	0.106	0.149718	2733.9	4758.4	2024.5	3876.8	385.59	95.8	9.3e-06	1.96007	23.77	-0.73	2.4	4349.7	6158.5	7622.8
749	RAv17_06	72	N	1	1	10	1	0	2	156	19	F	English	N			NA	Y	48	33		35	31	66	0.511905	0.69697	0.538462	10.19.17_01_27.20_av17_scrms	5.8.17_03_27.15_av17_scrm	5.8.17_03_27.15_av17_scrm.wav	0.708	2733	3952	0.106	0.149718	2733.9	4758.4	2024.5	3876.8	385.59	95.8	9.3e-06	1.96007	23.77	-0.73	2.4	4349.7	6158.5	7622.8
750	RAv17_06	7	N	1	4	8	1	1	1	672	21	F	English	N			NA	Y	49	33		44	43	87	0.583333	0.363636	0.615385	10.19.17_01_27.20_av17_scrms	5.8.17_03_27.15_av17_scrm	5.8.17_03_27.15_av17_scrm.wav	0.708	2733	3952	0.106	0.149718	2733.9	4758.4	2024.5	3876.8	385.59	95.8	9.3e-06	1.96007	23.77	-0.73	2.4	4349.7	6158.5	7622.8
751	RDm17_01	93	N	1	2	10	1	0	2	1457	19	F	English	N			NA	Y	53	37		38	38	76	0.52381	0.30303	0.487179	Dm_scrm_9.12.16_03_8.10_scrm	Hair_11.14.16_01_12.27_dm17_scrm+gruntsxxxxx	Hair_11.14.16_01_12.27_dm17_scrm+gruntsxxxxx.wav	0.348	1338	2245	0.106	0.304598	1338	7077.9	5739.9	3994.1	1954.63	68.6	6.15e-05	2.01871	30.21	-2.56	2.52	3273	4823.4	5727.8
752	RDm17_01	111	N	1	2	39	1	1	1	598	21	F	English	N			NA	N	39	39		40	36	76	0.511905	0.575758	0.512821	Dm_scrm_9.12.16_03_8.10_scrm	Hair_11.14.16_01_12.27_dm17_scrm+gruntsxxxxx	Hair_11.14.16_01_12.27_dm17_scrm+gruntsxxxxx.wav	0.348	1338	2245	0.106	0.304598	1338	7077.9	5739.9	3994.1	1954.63	68.6	6.15e-05	2.01871	30.21	-2.56	2.52	3273	4823.4	5727.8
753	RDm17_01	97	N	1	3	32	1	0	2	402	19	F	English	N			NA	Y	48	28		40	43	83	0.595238	0.606061	0.487179	Dm_scrm_9.12.16_03_8.10_scrm	Hair_11.14.16_01_12.27_dm17_scrm+gruntsxxxxx	Hair_11.14.16_01_12.27_dm17_scrm+gruntsxxxxx.wav	0.348	1338	2245	0.106	0.304598	1338	7077.9	5739.9	3994.1	1954.63	68.6	6.15e-05	2.01871	30.21	-2.56	2.52	3273	4823.4	5727.8
754	RDm17_01	48	N	1	3	11	1	1	1	686	19	F	English	N			NA	Y	33	36		36	46	82	0.654762	0.606061	0.564103	Dm_scrm_9.12.16_03_8.10_scrm	Hair_11.14.16_01_12.27_dm17_scrm+gruntsxxxxx	Hair_11.14.16_01_12.27_dm17_scrm+gruntsxxxxx.wav	0.348	1338	2245	0.106	0.304598	1338	7077.9	5739.9	3994.1	1954.63	68.6	6.15e-05	2.01871	30.21	-2.56	2.52	3273	4823.4	5727.8
755	RDm17_01	1	N	1	2	36	1	1	1	336	20	F	English	Y	cats, dogs	12	NA	Y	38	33		NA	40	NA	0.642857	0.333333	0.564103	Dm_scrm_9.12.16_03_8.10_scrm	Hair_11.14.16_01_12.27_dm17_scrm+gruntsxxxxx	Hair_11.14.16_01_12.27_dm17_scrm+gruntsxxxxx.wav	0.348	1338	2245	0.106	0.304598	1338	7077.9	5739.9	3994.1	1954.63	68.6	6.15e-05	2.01871	30.21	-2.56	2.52	3273	4823.4	5727.8
756	RDm17_01	90	N	1	4	7	1	1	1	827	21	M	English	N			NA	N	43	24		42	42	84	0.52381	0.69697	0.641026	Dm_scrm_9.12.16_03_8.10_scrm	Hair_11.14.16_01_12.27_dm17_scrm+gruntsxxxxx	Hair_11.14.16_01_12.27_dm17_scrm+gruntsxxxxx.wav	0.348	1338	2245	0.106	0.304598	1338	7077.9	5739.9	3994.1	1954.63	68.6	6.15e-05	2.01871	30.21	-2.56	2.52	3273	4823.4	5727.8
757	RDm17_01	113	N	1	1	3	1	0	2	814	18	F	English	N			NA	Y	52	38		47	41	88	0.583333	0.848485	0.564103	Dm_scrm_9.12.16_03_8.10_scrm	Hair_11.14.16_01_12.27_dm17_scrm+gruntsxxxxx	Hair_11.14.16_01_12.27_dm17_scrm+gruntsxxxxx.wav	0.348	1338	2245	0.106	0.304598	1338	7077.9	5739.9	3994.1	1954.63	68.6	6.15e-05	2.01871	30.21	-2.56	2.52	3273	4823.4	5727.8
758	RDm17_01	107	N	1	2	29	1	0	2	1036	22	F	Chinese	N			NA	N	21	37		NA	NA	NA	0.595238	0.424242	0.435897	Dm_scrm_9.12.16_03_8.10_scrm	Hair_11.14.16_01_12.27_dm17_scrm+gruntsxxxxx	Hair_11.14.16_01_12.27_dm17_scrm+gruntsxxxxx.wav	0.348	1338	2245	0.106	0.304598	1338	7077.9	5739.9	3994.1	1954.63	68.6	6.15e-05	2.01871	30.21	-2.56	2.52	3273	4823.4	5727.8
759	RDm17_01	46	N	1	1	22	1	1	1	539	18	F	English	N			NA	Y	45	25		39	42	81	0.619048	0.515152	0.589744	Dm_scrm_9.12.16_03_8.10_scrm	Hair_11.14.16_01_12.27_dm17_scrm+gruntsxxxxx	Hair_11.14.16_01_12.27_dm17_scrm+gruntsxxxxx.wav	0.348	1338	2245	0.106	0.304598	1338	7077.9	5739.9	3994.1	1954.63	68.6	6.15e-05	2.01871	30.21	-2.56	2.52	3273	4823.4	5727.8
760	RDm17_01	27	N	1	1	7	1	0	2	460	23	F	Telugu	N			NA	N	32	44		NA	NA	NA	0.547619	0.151515	0.512821	Dm_scrm_9.12.16_03_8.10_scrm	Hair_11.14.16_01_12.27_dm17_scrm+gruntsxxxxx	Hair_11.14.16_01_12.27_dm17_scrm+gruntsxxxxx.wav	0.348	1338	2245	0.106	0.304598	1338	7077.9	5739.9	3994.1	1954.63	68.6	6.15e-05	2.01871	30.21	-2.56	2.52	3273	4823.4	5727.8
761	RDm17_01	109	N	1	2	22	1	1	1	1055	20	F	English	N			NA	Y	41	33		45	43	88	0.666667	0.727273	0.384615	Dm_scrm_9.12.16_03_8.10_scrm	Hair_11.14.16_01_12.27_dm17_scrm+gruntsxxxxx	Hair_11.14.16_01_12.27_dm17_scrm+gruntsxxxxx.wav	0.348	1338	2245	0.106	0.304598	1338	7077.9	5739.9	3994.1	1954.63	68.6	6.15e-05	2.01871	30.21	-2.56	2.52	3273	4823.4	5727.8
762	RDm17_01	60	N	1	1	3	1	0	2	409	18	F	Chinese	N			NA	Y	54	33		NA	NA	NA	0.595238	0.69697	0.615385	Dm_scrm_9.12.16_03_8.10_scrm	Hair_11.14.16_01_12.27_dm17_scrm+gruntsxxxxx	Hair_11.14.16_01_12.27_dm17_scrm+gruntsxxxxx.wav	0.348	1338	2245	0.106	0.304598	1338	7077.9	5739.9	3994.1	1954.63	68.6	6.15e-05	2.01871	30.21	-2.56	2.52	3273	4823.4	5727.8
763	RDm17_01	59	N	1	2	1	1	0	2	226	18	M	Gujarati	N			NA	N	37	38		NA	NA	NA	0.52381	0.393939	0.666667	Dm_scrm_9.12.16_03_8.10_scrm	Hair_11.14.16_01_12.27_dm17_scrm+gruntsxxxxx	Hair_11.14.16_01_12.27_dm17_scrm+gruntsxxxxx.wav	0.348	1338	2245	0.106	0.304598	1338	7077.9	5739.9	3994.1	1954.63	68.6	6.15e-05	2.01871	30.21	-2.56	2.52	3273	4823.4	5727.8
764	RDm17_01	13	N	1	3	26	1	1	1	1097	19	F	English	N			NA	N	21	34		42	41	83	0.5	0.666667	0.487179	Dm_scrm_9.12.16_03_8.10_scrm	Hair_11.14.16_01_12.27_dm17_scrm+gruntsxxxxx	Hair_11.14.16_01_12.27_dm17_scrm+gruntsxxxxx.wav	0.348	1338	2245	0.106	0.304598	1338	7077.9	5739.9	3994.1	1954.63	68.6	6.15e-05	2.01871	30.21	-2.56	2.52	3273	4823.4	5727.8
765	RDm17_01	106	N	1	3	33	1	0	2	481	18	F	Korean	N			NA	Y	53	39		NA	NA	NA	0.607143	0.606061	0.461538	Dm_scrm_9.12.16_03_8.10_scrm	Hair_11.14.16_01_12.27_dm17_scrm+gruntsxxxxx	Hair_11.14.16_01_12.27_dm17_scrm+gruntsxxxxx.wav	0.348	1338	2245	0.106	0.304598	1338	7077.9	5739.9	3994.1	1954.63	68.6	6.15e-05	2.01871	30.21	-2.56	2.52	3273	4823.4	5727.8
766	RDm17_01	67	N	1	4	10	1	0	2	536	18	F	English	N			NA	N	29	44		32	32	64	0.75	0.636364	0.564103	Dm_scrm_9.12.16_03_8.10_scrm	Hair_11.14.16_01_12.27_dm17_scrm+gruntsxxxxx	Hair_11.14.16_01_12.27_dm17_scrm+gruntsxxxxx.wav	0.348	1338	2245	0.106	0.304598	1338	7077.9	5739.9	3994.1	1954.63	68.6	6.15e-05	2.01871	30.21	-2.56	2.52	3273	4823.4	5727.8
767	RDm17_01	95	N	1	1	25	1	1	1	445	20	F	English	N			NA	Y	57	30		39	44	83	0.571429	0.363636	0.564103	Dm_scrm_9.12.16_03_8.10_scrm	Hair_11.14.16_01_12.27_dm17_scrm+gruntsxxxxx	Hair_11.14.16_01_12.27_dm17_scrm+gruntsxxxxx.wav	0.348	1338	2245	0.106	0.304598	1338	7077.9	5739.9	3994.1	1954.63	68.6	6.15e-05	2.01871	30.21	-2.56	2.52	3273	4823.4	5727.8
768	RDm17_01	3	N	1	1	2	1	1	1	2661	28	M	English	N			NA	Y	39	30		45	42	87	0.559524	0.575758	0.487179	Dm_scrm_9.12.16_03_8.10_scrm	Hair_11.14.16_01_12.27_dm17_scrm+gruntsxxxxx	Hair_11.14.16_01_12.27_dm17_scrm+gruntsxxxxx.wav	0.348	1338	2245	0.106	0.304598	1338	7077.9	5739.9	3994.1	1954.63	68.6	6.15e-05	2.01871	30.21	-2.56	2.52	3273	4823.4	5727.8
769	RDm17_01	62	N	1	1	33	1	0	2	512	18	F	English	Y	mice	1	NA	Y	59	32		46	40	86	0.559524	0.484848	0.538462	Dm_scrm_9.12.16_03_8.10_scrm	Hair_11.14.16_01_12.27_dm17_scrm+gruntsxxxxx	Hair_11.14.16_01_12.27_dm17_scrm+gruntsxxxxx.wav	0.348	1338	2245	0.106	0.304598	1338	7077.9	5739.9	3994.1	1954.63	68.6	6.15e-05	2.01871	30.21	-2.56	2.52	3273	4823.4	5727.8
770	RDm17_01	91	N	1	4	19	1	1	1	708	20	F	Chinese	N			NA	N	49	36		NA	NA	NA	0.547619	0.606061	0.641026	Dm_scrm_9.12.16_03_8.10_scrm	Hair_11.14.16_01_12.27_dm17_scrm+gruntsxxxxx	Hair_11.14.16_01_12.27_dm17_scrm+gruntsxxxxx.wav	0.348	1338	2245	0.106	0.304598	1338	7077.9	5739.9	3994.1	1954.63	68.6	6.15e-05	2.01871	30.21	-2.56	2.52	3273	4823.4	5727.8
771	RDm17_01	64	N	1	2	18	1	1	1	2931	18	F	English	N			NA	N	55	36		40	42	82	0.654762	0.393939	0.666667	Dm_scrm_9.12.16_03_8.10_scrm	Hair_11.14.16_01_12.27_dm17_scrm+gruntsxxxxx	Hair_11.14.16_01_12.27_dm17_scrm+gruntsxxxxx.wav	0.348	1338	2245	0.106	0.304598	1338	7077.9	5739.9	3994.1	1954.63	68.6	6.15e-05	2.01871	30.21	-2.56	2.52	3273	4823.4	5727.8
772	RDm17_01	87	N	1	1	13	1	1	1	860	19	F	Korean	N			NA	Y	53	41		NA	NA	NA	0.654762	0.787879	0.615385	Dm_scrm_9.12.16_03_8.10_scrm	Hair_11.14.16_01_12.27_dm17_scrm+gruntsxxxxx	Hair_11.14.16_01_12.27_dm17_scrm+gruntsxxxxx.wav	0.348	1338	2245	0.106	0.304598	1338	7077.9	5739.9	3994.1	1954.63	68.6	6.15e-05	2.01871	30.21	-2.56	2.52	3273	4823.4	5727.8
773	RDm17_01	63	N	1	3	10	1	1	1	810	19	F	English	N			NA	N	60	40		44	42	86	0.535714	0	0.717949	Dm_scrm_9.12.16_03_8.10_scrm	Hair_11.14.16_01_12.27_dm17_scrm+gruntsxxxxx	Hair_11.14.16_01_12.27_dm17_scrm+gruntsxxxxx.wav	0.348	1338	2245	0.106	0.304598	1338	7077.9	5739.9	3994.1	1954.63	68.6	6.15e-05	2.01871	30.21	-2.56	2.52	3273	4823.4	5727.8
774	RDm17_01	68	N	1	4	21	1	0	2	1050	19	M	Spanish	N			NA	N	48	NA	didn't fill out this questionnaire animal	NA	NA	NA	0.607143	0.333333	0.641026	Dm_scrm_9.12.16_03_8.10_scrm	Hair_11.14.16_01_12.27_dm17_scrm+gruntsxxxxx	Hair_11.14.16_01_12.27_dm17_scrm+gruntsxxxxx.wav	0.348	1338	2245	0.106	0.304598	1338	7077.9	5739.9	3994.1	1954.63	68.6	6.15e-05	2.01871	30.21	-2.56	2.52	3273	4823.4	5727.8
775	RDm17_01	115	N	1	1	27	1	0	2	468	18	M	Mandarin	N			NA	N	31	37		NA	NA	NA	0.583333	0.575758	0.461538	Dm_scrm_9.12.16_03_8.10_scrm	Hair_11.14.16_01_12.27_dm17_scrm+gruntsxxxxx	Hair_11.14.16_01_12.27_dm17_scrm+gruntsxxxxx.wav	0.348	1338	2245	0.106	0.304598	1338	7077.9	5739.9	3994.1	1954.63	68.6	6.15e-05	2.01871	30.21	-2.56	2.52	3273	4823.4	5727.8
776	RDm17_01	94	N	1	3	38	1	1	1	852	20	F	English	N			NA	Y	45	44		40	44	84	0.72619	0.878788	0.410256	Dm_scrm_9.12.16_03_8.10_scrm	Hair_11.14.16_01_12.27_dm17_scrm+gruntsxxxxx	Hair_11.14.16_01_12.27_dm17_scrm+gruntsxxxxx.wav	0.348	1338	2245	0.106	0.304598	1338	7077.9	5739.9	3994.1	1954.63	68.6	6.15e-05	2.01871	30.21	-2.56	2.52	3273	4823.4	5727.8
777	RDm17_01	77	N	1	4	26	1	0	2	227	19	M	Chinese	N			NA	Y	46	18		NA	NA	NA	0.595238	0.454545	0.538462	Dm_scrm_9.12.16_03_8.10_scrm	Hair_11.14.16_01_12.27_dm17_scrm+gruntsxxxxx	Hair_11.14.16_01_12.27_dm17_scrm+gruntsxxxxx.wav	0.348	1338	2245	0.106	0.304598	1338	7077.9	5739.9	3994.1	1954.63	68.6	6.15e-05	2.01871	30.21	-2.56	2.52	3273	4823.4	5727.8
778	RDm17_01	41	N	1	2	9	1	0	2	344	20	M	Vietnamese	N			NA	Y	45	29		NA	NA	NA	0.630952	0.454545	0.435897	Dm_scrm_9.12.16_03_8.10_scrm	Hair_11.14.16_01_12.27_dm17_scrm+gruntsxxxxx	Hair_11.14.16_01_12.27_dm17_scrm+gruntsxxxxx.wav	0.348	1338	2245	0.106	0.304598	1338	7077.9	5739.9	3994.1	1954.63	68.6	6.15e-05	2.01871	30.21	-2.56	2.52	3273	4823.4	5727.8
779	RDm17_01	6	N	1	2	31	1	1	1	391	23	M	English	Y	mice	3	NA	Y	31	28		38	41	79	0.595238	0.484848	0.589744	Dm_scrm_9.12.16_03_8.10_scrm	Hair_11.14.16_01_12.27_dm17_scrm+gruntsxxxxx	Hair_11.14.16_01_12.27_dm17_scrm+gruntsxxxxx.wav	0.348	1338	2245	0.106	0.304598	1338	7077.9	5739.9	3994.1	1954.63	68.6	6.15e-05	2.01871	30.21	-2.56	2.52	3273	4823.4	5727.8
780	RDm17_01	508	Y	1	1	13	1	1	1	1769	40	F	English	Y	Rhesus macaque, pigtail macaque, sooty mangabey	192	120	Y	NA	NA		NA	NA	NA	0.511905	0.969697	0.641026	Dm_scrm_9.12.16_03_8.10_scrm	Hair_11.14.16_01_12.27_dm17_scrm+gruntsxxxxx	Hair_11.14.16_01_12.27_dm17_scrm+gruntsxxxxx.wav	0.348	1338	2245	0.106	0.304598	1338	7077.9	5739.9	3994.1	1954.63	68.6	6.15e-05	2.01871	30.21	-2.56	2.52	3273	4823.4	5727.8
781	RDm17_01	507	Y	1	2	6	1	0	2	5318	27	F	English	Y	Rhesus macaque, tufted capuchins	60	48	Y	NA	NA		NA	NA	NA	0.547619	1	0.666667	Dm_scrm_9.12.16_03_8.10_scrm	Hair_11.14.16_01_12.27_dm17_scrm+gruntsxxxxx	Hair_11.14.16_01_12.27_dm17_scrm+gruntsxxxxx.wav	0.348	1338	2245	0.106	0.304598	1338	7077.9	5739.9	3994.1	1954.63	68.6	6.15e-05	2.01871	30.21	-2.56	2.52	3273	4823.4	5727.8
782	RDm17_01	15	N	1	2	16	1	1	1	2242	20	F	English and Chinese	N			NA	Y	58	36	didn't make it to face - just voice	NA	36	NA	0.488095	0.393939	0.461538	Dm_scrm_9.12.16_03_8.10_scrm	Hair_11.14.16_01_12.27_dm17_scrm+gruntsxxxxx	Hair_11.14.16_01_12.27_dm17_scrm+gruntsxxxxx.wav	0.348	1338	2245	0.106	0.304598	1338	7077.9	5739.9	3994.1	1954.63	68.6	6.15e-05	2.01871	30.21	-2.56	2.52	3273	4823.4	5727.8
783	RDm17_01	30	N	1	3	38	1	0	2	486	19	F	Chinese	N			NA	N	43	31		NA	NA	NA	0.535714	0.151515	0.641026	Dm_scrm_9.12.16_03_8.10_scrm	Hair_11.14.16_01_12.27_dm17_scrm+gruntsxxxxx	Hair_11.14.16_01_12.27_dm17_scrm+gruntsxxxxx.wav	0.348	1338	2245	0.106	0.304598	1338	7077.9	5739.9	3994.1	1954.63	68.6	6.15e-05	2.01871	30.21	-2.56	2.52	3273	4823.4	5727.8
784	RDm17_01	73	N	1	2	8	1	1	1	539	19	F	English and Chinese	N			NA	Y	41	37		34	36	70	0.571429	0.575758	0.538462	Dm_scrm_9.12.16_03_8.10_scrm	Hair_11.14.16_01_12.27_dm17_scrm+gruntsxxxxx	Hair_11.14.16_01_12.27_dm17_scrm+gruntsxxxxx.wav	0.348	1338	2245	0.106	0.304598	1338	7077.9	5739.9	3994.1	1954.63	68.6	6.15e-05	2.01871	30.21	-2.56	2.52	3273	4823.4	5727.8
785	RDm17_01	49	N	1	3	15	1	0	2	607	18	F	English	N			NA	N	44	28		42	2	44	0.642857	0.454545	0.487179	Dm_scrm_9.12.16_03_8.10_scrm	Hair_11.14.16_01_12.27_dm17_scrm+gruntsxxxxx	Hair_11.14.16_01_12.27_dm17_scrm+gruntsxxxxx.wav	0.348	1338	2245	0.106	0.304598	1338	7077.9	5739.9	3994.1	1954.63	68.6	6.15e-05	2.01871	30.21	-2.56	2.52	3273	4823.4	5727.8
786	RDm17_01	33	N	1	3	22	1	1	1	276	19	F	Mandarin + English	N			NA	Y	56	33		NA	NA	NA	0.571429	0.272727	0.615385	Dm_scrm_9.12.16_03_8.10_scrm	Hair_11.14.16_01_12.27_dm17_scrm+gruntsxxxxx	Hair_11.14.16_01_12.27_dm17_scrm+gruntsxxxxx.wav	0.348	1338	2245	0.106	0.304598	1338	7077.9	5739.9	3994.1	1954.63	68.6	6.15e-05	2.01871	30.21	-2.56	2.52	3273	4823.4	5727.8
787	RDm17_01	84	N	1	1	29	1	1	1	360	19	F	English	N			NA	Y	34	36		35	37	72	0.547619	0.575758	0.512821	Dm_scrm_9.12.16_03_8.10_scrm	Hair_11.14.16_01_12.27_dm17_scrm+gruntsxxxxx	Hair_11.14.16_01_12.27_dm17_scrm+gruntsxxxxx.wav	0.348	1338	2245	0.106	0.304598	1338	7077.9	5739.9	3994.1	1954.63	68.6	6.15e-05	2.01871	30.21	-2.56	2.52	3273	4823.4	5727.8
788	RDm17_01	69	N	1	1	14	1	1	1	731	20	F	English	N			NA	Y	40	37		42	43	85	0.547619	0.424242	0.615385	Dm_scrm_9.12.16_03_8.10_scrm	Hair_11.14.16_01_12.27_dm17_scrm+gruntsxxxxx	Hair_11.14.16_01_12.27_dm17_scrm+gruntsxxxxx.wav	0.348	1338	2245	0.106	0.304598	1338	7077.9	5739.9	3994.1	1954.63	68.6	6.15e-05	2.01871	30.21	-2.56	2.52	3273	4823.4	5727.8
789	RDm17_01	65	N	1	4	1	1	1	1	1416	20	F	Arabic	Y			NA	N	36	35		NA	NA	NA	0.559524	0.363636	0.564103	Dm_scrm_9.12.16_03_8.10_scrm	Hair_11.14.16_01_12.27_dm17_scrm+gruntsxxxxx	Hair_11.14.16_01_12.27_dm17_scrm+gruntsxxxxx.wav	0.348	1338	2245	0.106	0.304598	1338	7077.9	5739.9	3994.1	1954.63	68.6	6.15e-05	2.01871	30.21	-2.56	2.52	3273	4823.4	5727.8
790	RDm17_01	18	N	1	1	33	1	0	2	550	20	F	English	N			NA	Y	44	35		32	42	74	0.571429	0.151515	0.333333	Dm_scrm_9.12.16_03_8.10_scrm	Hair_11.14.16_01_12.27_dm17_scrm+gruntsxxxxx	Hair_11.14.16_01_12.27_dm17_scrm+gruntsxxxxx.wav	0.348	1338	2245	0.106	0.304598	1338	7077.9	5739.9	3994.1	1954.63	68.6	6.15e-05	2.01871	30.21	-2.56	2.52	3273	4823.4	5727.8
791	RDm17_01	54	N	1	3	2	1	1	1	936	18	F	Chinese	N			NA	N	35	41		NA	NA	NA	0.535714	0.424242	0.538462	Dm_scrm_9.12.16_03_8.10_scrm	Hair_11.14.16_01_12.27_dm17_scrm+gruntsxxxxx	Hair_11.14.16_01_12.27_dm17_scrm+gruntsxxxxx.wav	0.348	1338	2245	0.106	0.304598	1338	7077.9	5739.9	3994.1	1954.63	68.6	6.15e-05	2.01871	30.21	-2.56	2.52	3273	4823.4	5727.8
792	RDm17_01	66	N	1	1	7	1	1	1	2475	20	M	Chinese	N			NA	N	41	38		NA	NA	NA	0.47619	0.69697	0.512821	Dm_scrm_9.12.16_03_8.10_scrm	Hair_11.14.16_01_12.27_dm17_scrm+gruntsxxxxx	Hair_11.14.16_01_12.27_dm17_scrm+gruntsxxxxx.wav	0.348	1338	2245	0.106	0.304598	1338	7077.9	5739.9	3994.1	1954.63	68.6	6.15e-05	2.01871	30.21	-2.56	2.52	3273	4823.4	5727.8
793	RDm17_01	96	N	1	4	7	1	0	2	452	18	F	English	N			NA	Y	59	39		44	47	91	0.583333	0.727273	0.512821	Dm_scrm_9.12.16_03_8.10_scrm	Hair_11.14.16_01_12.27_dm17_scrm+gruntsxxxxx	Hair_11.14.16_01_12.27_dm17_scrm+gruntsxxxxx.wav	0.348	1338	2245	0.106	0.304598	1338	7077.9	5739.9	3994.1	1954.63	68.6	6.15e-05	2.01871	30.21	-2.56	2.52	3273	4823.4	5727.8
794	RDm17_01	71	N	1	1	31	1	0	2	954	19	M	English	N			NA	Y	44	36		43	43	86	0.595238	0.424242	0.333333	Dm_scrm_9.12.16_03_8.10_scrm	Hair_11.14.16_01_12.27_dm17_scrm+gruntsxxxxx	Hair_11.14.16_01_12.27_dm17_scrm+gruntsxxxxx.wav	0.348	1338	2245	0.106	0.304598	1338	7077.9	5739.9	3994.1	1954.63	68.6	6.15e-05	2.01871	30.21	-2.56	2.52	3273	4823.4	5727.8
795	RDm17_01	36	N	1	2	21	1	0	2	445	19	F	English	Y	dogs, cats	4	NA	Y	53	31		42	42	84	0.416667	0.606061	0.435897	Dm_scrm_9.12.16_03_8.10_scrm	Hair_11.14.16_01_12.27_dm17_scrm+gruntsxxxxx	Hair_11.14.16_01_12.27_dm17_scrm+gruntsxxxxx.wav	0.348	1338	2245	0.106	0.304598	1338	7077.9	5739.9	3994.1	1954.63	68.6	6.15e-05	2.01871	30.21	-2.56	2.52	3273	4823.4	5727.8
796	RDm17_01	20	Y	1	3	37	1	0	2	454	37	F	English	Y	Rhesus, chimpanzees, dogs, cats, mice, rats	180	132	Y	52	33		46	47	93	0.392857	0.454545	0.589744	Dm_scrm_9.12.16_03_8.10_scrm	Hair_11.14.16_01_12.27_dm17_scrm+gruntsxxxxx	Hair_11.14.16_01_12.27_dm17_scrm+gruntsxxxxx.wav	0.348	1338	2245	0.106	0.304598	1338	7077.9	5739.9	3994.1	1954.63	68.6	6.15e-05	2.01871	30.21	-2.56	2.52	3273	4823.4	5727.8
797	RDm17_01	102	N	1	3	34	1	0	2	196	18	F	English	Y	elephants, dogs, tortoises	3	NA	Y	46	44		33	36	69	0.559524	0.424242	0.461538	Dm_scrm_9.12.16_03_8.10_scrm	Hair_11.14.16_01_12.27_dm17_scrm+gruntsxxxxx	Hair_11.14.16_01_12.27_dm17_scrm+gruntsxxxxx.wav	0.348	1338	2245	0.106	0.304598	1338	7077.9	5739.9	3994.1	1954.63	68.6	6.15e-05	2.01871	30.21	-2.56	2.52	3273	4823.4	5727.8
798	RDm17_01	89	N	1	2	5	1	1	1	527	18	F	Spanish	N			NA	Y	50	37		NA	NA	NA	0.619048	0.818182	0.589744	Dm_scrm_9.12.16_03_8.10_scrm	Hair_11.14.16_01_12.27_dm17_scrm+gruntsxxxxx	Hair_11.14.16_01_12.27_dm17_scrm+gruntsxxxxx.wav	0.348	1338	2245	0.106	0.304598	1338	7077.9	5739.9	3994.1	1954.63	68.6	6.15e-05	2.01871	30.21	-2.56	2.52	3273	4823.4	5727.8
799	RDm17_01	31	N	1	2	2	1	0	2	1340	18	F	English	N			NA	Y	47	35		38	40	78	0.583333	0.575758	0.384615	Dm_scrm_9.12.16_03_8.10_scrm	Hair_11.14.16_01_12.27_dm17_scrm+gruntsxxxxx	Hair_11.14.16_01_12.27_dm17_scrm+gruntsxxxxx.wav	0.348	1338	2245	0.106	0.304598	1338	7077.9	5739.9	3994.1	1954.63	68.6	6.15e-05	2.01871	30.21	-2.56	2.52	3273	4823.4	5727.8
800	RDm17_01	101	N	1	1	25	1	0	2	609	19	F	English	Y	mice	11	NA	Y	50	40		43	43	86	0.690476	0.484848	0.487179	Dm_scrm_9.12.16_03_8.10_scrm	Hair_11.14.16_01_12.27_dm17_scrm+gruntsxxxxx	Hair_11.14.16_01_12.27_dm17_scrm+gruntsxxxxx.wav	0.348	1338	2245	0.106	0.304598	1338	7077.9	5739.9	3994.1	1954.63	68.6	6.15e-05	2.01871	30.21	-2.56	2.52	3273	4823.4	5727.8
801	RDm17_01	9	N	1	2	12	1	1	1	797	19	M	English	Y	dogs, cats	3	NA	Y	41	31		35	32	67	0.416667	0.121212	0.435897	Dm_scrm_9.12.16_03_8.10_scrm	Hair_11.14.16_01_12.27_dm17_scrm+gruntsxxxxx	Hair_11.14.16_01_12.27_dm17_scrm+gruntsxxxxx.wav	0.348	1338	2245	0.106	0.304598	1338	7077.9	5739.9	3994.1	1954.63	68.6	6.15e-05	2.01871	30.21	-2.56	2.52	3273	4823.4	5727.8
802	RDm17_01	39	N	1	4	19	1	1	1	731	19	F	Spanish/English	N			NA	Y	55	38		41	43	84	0.583333	0.454545	0.538462	Dm_scrm_9.12.16_03_8.10_scrm	Hair_11.14.16_01_12.27_dm17_scrm+gruntsxxxxx	Hair_11.14.16_01_12.27_dm17_scrm+gruntsxxxxx.wav	0.348	1338	2245	0.106	0.304598	1338	7077.9	5739.9	3994.1	1954.63	68.6	6.15e-05	2.01871	30.21	-2.56	2.52	3273	4823.4	5727.8
803	RDm17_01	26	N	1	4	29	1	1	1	446	24	M	Telugu	N			NA	N	41	35		NA	NA	NA	0.607143	0.515152	0.538462	Dm_scrm_9.12.16_03_8.10_scrm	Hair_11.14.16_01_12.27_dm17_scrm+gruntsxxxxx	Hair_11.14.16_01_12.27_dm17_scrm+gruntsxxxxx.wav	0.348	1338	2245	0.106	0.304598	1338	7077.9	5739.9	3994.1	1954.63	68.6	6.15e-05	2.01871	30.21	-2.56	2.52	3273	4823.4	5727.8
804	RDm17_01	35	N	1	4	4	1	1	1	1130	19	M	English	N			NA	N	40	21		44	39	83	0.666667	0.818182	0.641026	Dm_scrm_9.12.16_03_8.10_scrm	Hair_11.14.16_01_12.27_dm17_scrm+gruntsxxxxx	Hair_11.14.16_01_12.27_dm17_scrm+gruntsxxxxx.wav	0.348	1338	2245	0.106	0.304598	1338	7077.9	5739.9	3994.1	1954.63	68.6	6.15e-05	2.01871	30.21	-2.56	2.52	3273	4823.4	5727.8
805	RDm17_01	11	N	1	2	5	1	1	1	1327	20	F	English (mainly) + Hindi	Y	dogs	6	NA	Y	66	45	noted w/ regard to coos that it is upsetting - sounds like they're in pain. Noted surpirse that screams would be more intense context than coos	34	41	75	0.666667	0.545455	0.641026	Dm_scrm_9.12.16_03_8.10_scrm	Hair_11.14.16_01_12.27_dm17_scrm+gruntsxxxxx	Hair_11.14.16_01_12.27_dm17_scrm+gruntsxxxxx.wav	0.348	1338	2245	0.106	0.304598	1338	7077.9	5739.9	3994.1	1954.63	68.6	6.15e-05	2.01871	30.21	-2.56	2.52	3273	4823.4	5727.8
806	RDm17_01	506	Y	1	3	32	1	0	2	592	37	F	English	Y	Rhesus macaque	120	120	Y	NA	NA		NA	NA	NA	0.559524	0.424242	0.487179	Dm_scrm_9.12.16_03_8.10_scrm	Hair_11.14.16_01_12.27_dm17_scrm+gruntsxxxxx	Hair_11.14.16_01_12.27_dm17_scrm+gruntsxxxxx.wav	0.348	1338	2245	0.106	0.304598	1338	7077.9	5739.9	3994.1	1954.63	68.6	6.15e-05	2.01871	30.21	-2.56	2.52	3273	4823.4	5727.8
807	RDm17_01	110	N	1	4	18	1	0	2	532	19	M	English	N			NA	Y	40	32		35	38	73	0.511905	0.69697	0.564103	Dm_scrm_9.12.16_03_8.10_scrm	Hair_11.14.16_01_12.27_dm17_scrm+gruntsxxxxx	Hair_11.14.16_01_12.27_dm17_scrm+gruntsxxxxx.wav	0.348	1338	2245	0.106	0.304598	1338	7077.9	5739.9	3994.1	1954.63	68.6	6.15e-05	2.01871	30.21	-2.56	2.52	3273	4823.4	5727.8
808	RDm17_01	61	N	1	3	27	1	0	2	290	19	M	English	N			NA	Y	42	36		43	35	78	0.619048	0.424242	0.461538	Dm_scrm_9.12.16_03_8.10_scrm	Hair_11.14.16_01_12.27_dm17_scrm+gruntsxxxxx	Hair_11.14.16_01_12.27_dm17_scrm+gruntsxxxxx.wav	0.348	1338	2245	0.106	0.304598	1338	7077.9	5739.9	3994.1	1954.63	68.6	6.15e-05	2.01871	30.21	-2.56	2.52	3273	4823.4	5727.8
809	RDm17_01	44	N	1	4	6	1	0	2	361	31	F	English	N			NA	Y	39	34		47	45	92	0.571429	0.606061	0.333333	Dm_scrm_9.12.16_03_8.10_scrm	Hair_11.14.16_01_12.27_dm17_scrm+gruntsxxxxx	Hair_11.14.16_01_12.27_dm17_scrm+gruntsxxxxx.wav	0.348	1338	2245	0.106	0.304598	1338	7077.9	5739.9	3994.1	1954.63	68.6	6.15e-05	2.01871	30.21	-2.56	2.52	3273	4823.4	5727.8
810	RDm17_01	103	N	1	1	12	1	0	2	388	19	F	Korean + English	Y	dogs, cats	3	NA	Y	47	39		40	41	81	0.52381	0.393939	0.512821	Dm_scrm_9.12.16_03_8.10_scrm	Hair_11.14.16_01_12.27_dm17_scrm+gruntsxxxxx	Hair_11.14.16_01_12.27_dm17_scrm+gruntsxxxxx.wav	0.348	1338	2245	0.106	0.304598	1338	7077.9	5739.9	3994.1	1954.63	68.6	6.15e-05	2.01871	30.21	-2.56	2.52	3273	4823.4	5727.8
811	RDm17_01	25	N	1	4	32	1	1	1	724	21	M	English	N			NA	N	56	32		34	41	75	0.5	0.575758	0.461538	Dm_scrm_9.12.16_03_8.10_scrm	Hair_11.14.16_01_12.27_dm17_scrm+gruntsxxxxx	Hair_11.14.16_01_12.27_dm17_scrm+gruntsxxxxx.wav	0.348	1338	2245	0.106	0.304598	1338	7077.9	5739.9	3994.1	1954.63	68.6	6.15e-05	2.01871	30.21	-2.56	2.52	3273	4823.4	5727.8
812	RDm17_01	42	N	1	1	5	1	0	2	333	19	F	English	N			NA	N	35	28		44	44	88	0.571429	0.454545	0.692308	Dm_scrm_9.12.16_03_8.10_scrm	Hair_11.14.16_01_12.27_dm17_scrm+gruntsxxxxx	Hair_11.14.16_01_12.27_dm17_scrm+gruntsxxxxx.wav	0.348	1338	2245	0.106	0.304598	1338	7077.9	5739.9	3994.1	1954.63	68.6	6.15e-05	2.01871	30.21	-2.56	2.52	3273	4823.4	5727.8
813	RDm17_01	17	N	1	4	39	1	0	2	5230	19	F	Chinese	N			NA	Y	49	34		NA	NA	NA	0.595238	1	0.487179	Dm_scrm_9.12.16_03_8.10_scrm	Hair_11.14.16_01_12.27_dm17_scrm+gruntsxxxxx	Hair_11.14.16_01_12.27_dm17_scrm+gruntsxxxxx.wav	0.348	1338	2245	0.106	0.304598	1338	7077.9	5739.9	3994.1	1954.63	68.6	6.15e-05	2.01871	30.21	-2.56	2.52	3273	4823.4	5727.8
814	RDm17_01	92	N	1	3	25	1	1	1	293	18	F	English	N			NA	Y	45	30		36	36	72	0.595238	0.212121	0.589744	Dm_scrm_9.12.16_03_8.10_scrm	Hair_11.14.16_01_12.27_dm17_scrm+gruntsxxxxx	Hair_11.14.16_01_12.27_dm17_scrm+gruntsxxxxx.wav	0.348	1338	2245	0.106	0.304598	1338	7077.9	5739.9	3994.1	1954.63	68.6	6.15e-05	2.01871	30.21	-2.56	2.52	3273	4823.4	5727.8
815	RDm17_01	14	N	1	4	8	1	0	2	3290	19	M	English and Mandarin	N			NA	N	43	35		32	39	71	0.642857	0.818182	0.615385	Dm_scrm_9.12.16_03_8.10_scrm	Hair_11.14.16_01_12.27_dm17_scrm+gruntsxxxxx	Hair_11.14.16_01_12.27_dm17_scrm+gruntsxxxxx.wav	0.348	1338	2245	0.106	0.304598	1338	7077.9	5739.9	3994.1	1954.63	68.6	6.15e-05	2.01871	30.21	-2.56	2.52	3273	4823.4	5727.8
816	RDm17_01	85	N	1	2	30	1	0	2	421	19	F	Chinese	N			NA	Y	25	32		NA	NA	NA	0.571429	0.363636	0.435897	Dm_scrm_9.12.16_03_8.10_scrm	Hair_11.14.16_01_12.27_dm17_scrm+gruntsxxxxx	Hair_11.14.16_01_12.27_dm17_scrm+gruntsxxxxx.wav	0.348	1338	2245	0.106	0.304598	1338	7077.9	5739.9	3994.1	1954.63	68.6	6.15e-05	2.01871	30.21	-2.56	2.52	3273	4823.4	5727.8
817	RDm17_01	104	N	1	2	17	1	1	1	1495	19	F	Bangla	N			NA	N	49	31		NA	NA	NA	0.619048	0.363636	0.384615	Dm_scrm_9.12.16_03_8.10_scrm	Hair_11.14.16_01_12.27_dm17_scrm+gruntsxxxxx	Hair_11.14.16_01_12.27_dm17_scrm+gruntsxxxxx.wav	0.348	1338	2245	0.106	0.304598	1338	7077.9	5739.9	3994.1	1954.63	68.6	6.15e-05	2.01871	30.21	-2.56	2.52	3273	4823.4	5727.8
818	RDm17_01	58	N	1	2	7	1	0	2	326	21	F	Spanish	Y	mice, rats	2	NA	Y	53	33		NA	NA	NA	0.547619	0.515152	0.461538	Dm_scrm_9.12.16_03_8.10_scrm	Hair_11.14.16_01_12.27_dm17_scrm+gruntsxxxxx	Hair_11.14.16_01_12.27_dm17_scrm+gruntsxxxxx.wav	0.348	1338	2245	0.106	0.304598	1338	7077.9	5739.9	3994.1	1954.63	68.6	6.15e-05	2.01871	30.21	-2.56	2.52	3273	4823.4	5727.8
819	RDm17_01	4	N	1	2	7	1	1	1	231	20	M	English	N			NA	N	43	38		27	24	51	0.559524	0.424242	0.589744	Dm_scrm_9.12.16_03_8.10_scrm	Hair_11.14.16_01_12.27_dm17_scrm+gruntsxxxxx	Hair_11.14.16_01_12.27_dm17_scrm+gruntsxxxxx.wav	0.348	1338	2245	0.106	0.304598	1338	7077.9	5739.9	3994.1	1954.63	68.6	6.15e-05	2.01871	30.21	-2.56	2.52	3273	4823.4	5727.8
820	RDm17_01	34	N	1	1	14	1	1	1	470	24	M	Mandarin	N			NA	N	15	37		NA	NA	NA	0.511905	0.757576	0.282051	Dm_scrm_9.12.16_03_8.10_scrm	Hair_11.14.16_01_12.27_dm17_scrm+gruntsxxxxx	Hair_11.14.16_01_12.27_dm17_scrm+gruntsxxxxx.wav	0.348	1338	2245	0.106	0.304598	1338	7077.9	5739.9	3994.1	1954.63	68.6	6.15e-05	2.01871	30.21	-2.56	2.52	3273	4823.4	5727.8
821	RDm17_01	16	N	1	2	30	1	0	2	760	21	F	English	Y	dogs, cats	6	NA	Y	44	43		38	40	78	0.559524	0.545455	0.461538	Dm_scrm_9.12.16_03_8.10_scrm	Hair_11.14.16_01_12.27_dm17_scrm+gruntsxxxxx	Hair_11.14.16_01_12.27_dm17_scrm+gruntsxxxxx.wav	0.348	1338	2245	0.106	0.304598	1338	7077.9	5739.9	3994.1	1954.63	68.6	6.15e-05	2.01871	30.21	-2.56	2.52	3273	4823.4	5727.8
822	RDm17_01	510	Y	1	4	10	1	0	2	3295	30	M	English	Y	Rhesus macaque, Sooty mangabey	60	60	Y	NA	NA	asked for more clarification on "intense emotion" ~3 min into task	NA	NA	NA	0.511905	0.727273	0.717949	Dm_scrm_9.12.16_03_8.10_scrm	Hair_11.14.16_01_12.27_dm17_scrm+gruntsxxxxx	Hair_11.14.16_01_12.27_dm17_scrm+gruntsxxxxx.wav	0.348	1338	2245	0.106	0.304598	1338	7077.9	5739.9	3994.1	1954.63	68.6	6.15e-05	2.01871	30.21	-2.56	2.52	3273	4823.4	5727.8
823	RDm17_01	505	Y	1	3	19	1	1	1	793	30	F	English	Y	Rhesus macaque, horses, dogs, cats, birds, mangabey	120	94	Y	NA	NA		NA	NA	NA	0.595238	1	0.589744	Dm_scrm_9.12.16_03_8.10_scrm	Hair_11.14.16_01_12.27_dm17_scrm+gruntsxxxxx	Hair_11.14.16_01_12.27_dm17_scrm+gruntsxxxxx.wav	0.348	1338	2245	0.106	0.304598	1338	7077.9	5739.9	3994.1	1954.63	68.6	6.15e-05	2.01871	30.21	-2.56	2.52	3273	4823.4	5727.8
824	RDm17_01	51	N	1	3	14	1	1	1	2195	18	F	English	N			NA	Y	31	36		45	44	89	0.654762	0.515152	0.615385	Dm_scrm_9.12.16_03_8.10_scrm	Hair_11.14.16_01_12.27_dm17_scrm+gruntsxxxxx	Hair_11.14.16_01_12.27_dm17_scrm+gruntsxxxxx.wav	0.348	1338	2245	0.106	0.304598	1338	7077.9	5739.9	3994.1	1954.63	68.6	6.15e-05	2.01871	30.21	-2.56	2.52	3273	4823.4	5727.8
825	RDm17_01	40	N	1	1	30	1	1	1	427	19	F	Chinese	N			NA	N	39	39		NA	NA	NA	0.666667	0.515152	0.512821	Dm_scrm_9.12.16_03_8.10_scrm	Hair_11.14.16_01_12.27_dm17_scrm+gruntsxxxxx	Hair_11.14.16_01_12.27_dm17_scrm+gruntsxxxxx.wav	0.348	1338	2245	0.106	0.304598	1338	7077.9	5739.9	3994.1	1954.63	68.6	6.15e-05	2.01871	30.21	-2.56	2.52	3273	4823.4	5727.8
826	RDm17_01	78	N	1	1	17	1	0	2	586	20	M	Spanish	Y	dogs, snakes	2	NA	Y	45	35		NA	NA	NA	0.547619	0.424242	0.487179	Dm_scrm_9.12.16_03_8.10_scrm	Hair_11.14.16_01_12.27_dm17_scrm+gruntsxxxxx	Hair_11.14.16_01_12.27_dm17_scrm+gruntsxxxxx.wav	0.348	1338	2245	0.106	0.304598	1338	7077.9	5739.9	3994.1	1954.63	68.6	6.15e-05	2.01871	30.21	-2.56	2.52	3273	4823.4	5727.8
827	RDm17_01	72	N	1	1	12	1	0	2	447	19	F	English	N			NA	Y	48	33		35	31	66	0.511905	0.69697	0.538462	Dm_scrm_9.12.16_03_8.10_scrm	Hair_11.14.16_01_12.27_dm17_scrm+gruntsxxxxx	Hair_11.14.16_01_12.27_dm17_scrm+gruntsxxxxx.wav	0.348	1338	2245	0.106	0.304598	1338	7077.9	5739.9	3994.1	1954.63	68.6	6.15e-05	2.01871	30.21	-2.56	2.52	3273	4823.4	5727.8
828	RDm17_01	38	N	1	3	12	1	0	2	3921	18	F	English	N			NA	Y	57	36		41	41	82	0.619048	0.606061	0.615385	Dm_scrm_9.12.16_03_8.10_scrm	Hair_11.14.16_01_12.27_dm17_scrm+gruntsxxxxx	Hair_11.14.16_01_12.27_dm17_scrm+gruntsxxxxx.wav	0.348	1338	2245	0.106	0.304598	1338	7077.9	5739.9	3994.1	1954.63	68.6	6.15e-05	2.01871	30.21	-2.56	2.52	3273	4823.4	5727.8
829	RDm17_01	56	N	1	1	14	1	1	1	652	18	F	Chinese	N			NA	Y	31	30		NA	NA	NA	0.595238	0.575758	0.384615	Dm_scrm_9.12.16_03_8.10_scrm	Hair_11.14.16_01_12.27_dm17_scrm+gruntsxxxxx	Hair_11.14.16_01_12.27_dm17_scrm+gruntsxxxxx.wav	0.348	1338	2245	0.106	0.304598	1338	7077.9	5739.9	3994.1	1954.63	68.6	6.15e-05	2.01871	30.21	-2.56	2.52	3273	4823.4	5727.8
830	RDm17_01	50	N	1	3	32	1	0	2	507	19	F	English	Y	dogs, cats	12	NA	Y	53	40		24	19	43	0.5	0.212121	0.512821	Dm_scrm_9.12.16_03_8.10_scrm	Hair_11.14.16_01_12.27_dm17_scrm+gruntsxxxxx	Hair_11.14.16_01_12.27_dm17_scrm+gruntsxxxxx.wav	0.348	1338	2245	0.106	0.304598	1338	7077.9	5739.9	3994.1	1954.63	68.6	6.15e-05	2.01871	30.21	-2.56	2.52	3273	4823.4	5727.8
831	RDm17_01	83	N	1	4	30	1	1	1	639	19	F	English	N			NA	Y	55	46		48	46	94	0.5	0.333333	0.487179	Dm_scrm_9.12.16_03_8.10_scrm	Hair_11.14.16_01_12.27_dm17_scrm+gruntsxxxxx	Hair_11.14.16_01_12.27_dm17_scrm+gruntsxxxxx.wav	0.348	1338	2245	0.106	0.304598	1338	7077.9	5739.9	3994.1	1954.63	68.6	6.15e-05	2.01871	30.21	-2.56	2.52	3273	4823.4	5727.8
832	RDm17_01	52	N	1	3	11	1	1	1	153	19	F	English	N			NA	Y	55	38		42	43	85	0.619048	0.393939	0.512821	Dm_scrm_9.12.16_03_8.10_scrm	Hair_11.14.16_01_12.27_dm17_scrm+gruntsxxxxx	Hair_11.14.16_01_12.27_dm17_scrm+gruntsxxxxx.wav	0.348	1338	2245	0.106	0.304598	1338	7077.9	5739.9	3994.1	1954.63	68.6	6.15e-05	2.01871	30.21	-2.56	2.52	3273	4823.4	5727.8
833	RDm17_01	80	N	1	1	17	1	1	1	572	18	F	English	N			NA	Y	57	34		36	3	39	0.607143	0.545455	0.358974	Dm_scrm_9.12.16_03_8.10_scrm	Hair_11.14.16_01_12.27_dm17_scrm+gruntsxxxxx	Hair_11.14.16_01_12.27_dm17_scrm+gruntsxxxxx.wav	0.348	1338	2245	0.106	0.304598	1338	7077.9	5739.9	3994.1	1954.63	68.6	6.15e-05	2.01871	30.21	-2.56	2.52	3273	4823.4	5727.8
834	RDm17_01	57	N	1	2	20	1	1	1	334	20	F	English	N			NA	N	29	31		27	41	68	0.547619	0.333333	0.538462	Dm_scrm_9.12.16_03_8.10_scrm	Hair_11.14.16_01_12.27_dm17_scrm+gruntsxxxxx	Hair_11.14.16_01_12.27_dm17_scrm+gruntsxxxxx.wav	0.348	1338	2245	0.106	0.304598	1338	7077.9	5739.9	3994.1	1954.63	68.6	6.15e-05	2.01871	30.21	-2.56	2.52	3273	4823.4	5727.8
835	RDm17_01	47	N	1	1	34	1	0	2	352	18	F	English	N			NA	Y	60	42		42	45	87	0.47619	0.30303	0.333333	Dm_scrm_9.12.16_03_8.10_scrm	Hair_11.14.16_01_12.27_dm17_scrm+gruntsxxxxx	Hair_11.14.16_01_12.27_dm17_scrm+gruntsxxxxx.wav	0.348	1338	2245	0.106	0.304598	1338	7077.9	5739.9	3994.1	1954.63	68.6	6.15e-05	2.01871	30.21	-2.56	2.52	3273	4823.4	5727.8
836	RDm17_01	105	N	1	4	12	1	0	2	15	19	F	English	N			NA	Y	44	36		40	42	82	0.571429	0.606061	0.435897	Dm_scrm_9.12.16_03_8.10_scrm	Hair_11.14.16_01_12.27_dm17_scrm+gruntsxxxxx	Hair_11.14.16_01_12.27_dm17_scrm+gruntsxxxxx.wav	0.348	1338	2245	0.106	0.304598	1338	7077.9	5739.9	3994.1	1954.63	68.6	6.15e-05	2.01871	30.21	-2.56	2.52	3273	4823.4	5727.8
837	RDm17_01	7	N	1	4	29	1	1	1	359	21	F	English	N			NA	Y	49	33		44	43	87	0.583333	0.363636	0.615385	Dm_scrm_9.12.16_03_8.10_scrm	Hair_11.14.16_01_12.27_dm17_scrm+gruntsxxxxx	Hair_11.14.16_01_12.27_dm17_scrm+gruntsxxxxx.wav	0.348	1338	2245	0.106	0.304598	1338	7077.9	5739.9	3994.1	1954.63	68.6	6.15e-05	2.01871	30.21	-2.56	2.52	3273	4823.4	5727.8
838	RDm17_01	23	N	1	2	16	1	1	1	714	20	F	Mandarin	N			NA	N	38	33		NA	NA	NA	0.52381	0.575758	0.564103	Dm_scrm_9.12.16_03_8.10_scrm	Hair_11.14.16_01_12.27_dm17_scrm+gruntsxxxxx	Hair_11.14.16_01_12.27_dm17_scrm+gruntsxxxxx.wav	0.348	1338	2245	0.106	0.304598	1338	7077.9	5739.9	3994.1	1954.63	68.6	6.15e-05	2.01871	30.21	-2.56	2.52	3273	4823.4	5727.8
839	RDm17_01	82	N	1	1	38	1	0	2	1938	18	F	Korean	Y	dogs, cats	3	NA	Y	31	40		NA	NA	NA	0.559524	0.333333	0.641026	Dm_scrm_9.12.16_03_8.10_scrm	Hair_11.14.16_01_12.27_dm17_scrm+gruntsxxxxx	Hair_11.14.16_01_12.27_dm17_scrm+gruntsxxxxx.wav	0.348	1338	2245	0.106	0.304598	1338	7077.9	5739.9	3994.1	1954.63	68.6	6.15e-05	2.01871	30.21	-2.56	2.52	3273	4823.4	5727.8
840	RDm17_01	81	N	1	2	33	1	0	2	1057	18	F	English	N			NA	Y	53	33		43	51	94	0.690476	0.454545	0.538462	Dm_scrm_9.12.16_03_8.10_scrm	Hair_11.14.16_01_12.27_dm17_scrm+gruntsxxxxx	Hair_11.14.16_01_12.27_dm17_scrm+gruntsxxxxx.wav	0.348	1338	2245	0.106	0.304598	1338	7077.9	5739.9	3994.1	1954.63	68.6	6.15e-05	2.01871	30.21	-2.56	2.52	3273	4823.4	5727.8
841	RDm17_01	8	N	1	3	26	1	1	1	528	19	F	English	Y	dogs, cats	24	NA	Y	58	40		39	43	82	0.595238	0.363636	0.589744	Dm_scrm_9.12.16_03_8.10_scrm	Hair_11.14.16_01_12.27_dm17_scrm+gruntsxxxxx	Hair_11.14.16_01_12.27_dm17_scrm+gruntsxxxxx.wav	0.348	1338	2245	0.106	0.304598	1338	7077.9	5739.9	3994.1	1954.63	68.6	6.15e-05	2.01871	30.21	-2.56	2.52	3273	4823.4	5727.8
842	RDm17_01	2	N	1	1	30	1	0	2	371	19	F	English	N			NA	Y	49	42		36	37	73	0.595238	0.0606061	0.641026	Dm_scrm_9.12.16_03_8.10_scrm	Hair_11.14.16_01_12.27_dm17_scrm+gruntsxxxxx	Hair_11.14.16_01_12.27_dm17_scrm+gruntsxxxxx.wav	0.348	1338	2245	0.106	0.304598	1338	7077.9	5739.9	3994.1	1954.63	68.6	6.15e-05	2.01871	30.21	-2.56	2.52	3273	4823.4	5727.8
843	RDm17_01	88	N	1	2	22	1	1	1	546	19	M	Mandarin	N			NA	Y	49	27		NA	NA	NA	0.547619	0.818182	0.538462	Dm_scrm_9.12.16_03_8.10_scrm	Hair_11.14.16_01_12.27_dm17_scrm+gruntsxxxxx	Hair_11.14.16_01_12.27_dm17_scrm+gruntsxxxxx.wav	0.348	1338	2245	0.106	0.304598	1338	7077.9	5739.9	3994.1	1954.63	68.6	6.15e-05	2.01871	30.21	-2.56	2.52	3273	4823.4	5727.8
844	RDm17_01	512	Y	1	1	26	1	1	1	945	39	M	English	Y	Rhesus macaque, pigtail macaque, common chimpanzee, west lowland gorilla, Sooty mangabey	144	144	Y	NA	NA	occasionally needed to answer radio during task	NA	NA	NA	0.642857	1	0.589744	Dm_scrm_9.12.16_03_8.10_scrm	Hair_11.14.16_01_12.27_dm17_scrm+gruntsxxxxx	Hair_11.14.16_01_12.27_dm17_scrm+gruntsxxxxx.wav	0.348	1338	2245	0.106	0.304598	1338	7077.9	5739.9	3994.1	1954.63	68.6	6.15e-05	2.01871	30.21	-2.56	2.52	3273	4823.4	5727.8
845	RDm17_01	114	N	1	3	6	1	1	1	3746	19	M	English	N			NA	Y	58	35		36	38	74	0.607143	0.393939	0.512821	Dm_scrm_9.12.16_03_8.10_scrm	Hair_11.14.16_01_12.27_dm17_scrm+gruntsxxxxx	Hair_11.14.16_01_12.27_dm17_scrm+gruntsxxxxx.wav	0.348	1338	2245	0.106	0.304598	1338	7077.9	5739.9	3994.1	1954.63	68.6	6.15e-05	2.01871	30.21	-2.56	2.52	3273	4823.4	5727.8
846	RDm17_01	22	N	1	4	32	1	1	1	1821	31	F	English	Y	dogs, cats	6	NA	Y	56	49		47	46	93	0.452381	0.515152	0.692308	Dm_scrm_9.12.16_03_8.10_scrm	Hair_11.14.16_01_12.27_dm17_scrm+gruntsxxxxx	Hair_11.14.16_01_12.27_dm17_scrm+gruntsxxxxx.wav	0.348	1338	2245	0.106	0.304598	1338	7077.9	5739.9	3994.1	1954.63	68.6	6.15e-05	2.01871	30.21	-2.56	2.52	3273	4823.4	5727.8
847	RDm17_01	100	N	1	4	29	1	0	2	2766	21	F	Mandarin	N			NA	Y	50	36		NA	NA	NA	0.619048	0.424242	0.641026	Dm_scrm_9.12.16_03_8.10_scrm	Hair_11.14.16_01_12.27_dm17_scrm+gruntsxxxxx	Hair_11.14.16_01_12.27_dm17_scrm+gruntsxxxxx.wav	0.348	1338	2245	0.106	0.304598	1338	7077.9	5739.9	3994.1	1954.63	68.6	6.15e-05	2.01871	30.21	-2.56	2.52	3273	4823.4	5727.8
848	RDm17_01	501	Y	1	1	11	1	1	1	1008	26	M	English	Y	lemurs (black white ruffed, ringtail, red bellied, crown, mongoose), Rhesus monkeys, gorillas, orangutans	Lemur: 24, Rh: 48, Gorilla: 12, Orangutan: 12	48	Y	47	37		46	44	90	0.559524	0.69697	0.461538	Dm_scrm_9.12.16_03_8.10_scrm	Hair_11.14.16_01_12.27_dm17_scrm+gruntsxxxxx	Hair_11.14.16_01_12.27_dm17_scrm+gruntsxxxxx.wav	0.348	1338	2245	0.106	0.304598	1338	7077.9	5739.9	3994.1	1954.63	68.6	6.15e-05	2.01871	30.21	-2.56	2.52	3273	4823.4	5727.8
849	RDm17_01	19	N	1	4	20	1	1	1	466	51	F	English	Y	mice	240	NA	Y	36	29		43	47	90	0.511905	0.575758	0.487179	Dm_scrm_9.12.16_03_8.10_scrm	Hair_11.14.16_01_12.27_dm17_scrm+gruntsxxxxx	Hair_11.14.16_01_12.27_dm17_scrm+gruntsxxxxx.wav	0.348	1338	2245	0.106	0.304598	1338	7077.9	5739.9	3994.1	1954.63	68.6	6.15e-05	2.01871	30.21	-2.56	2.52	3273	4823.4	5727.8
850	RDm17_01	53	N	1	4	14	1	0	2	329	18	F	English	N			NA	N	71	47		22	17	39	0.642857	0.787879	0.641026	Dm_scrm_9.12.16_03_8.10_scrm	Hair_11.14.16_01_12.27_dm17_scrm+gruntsxxxxx	Hair_11.14.16_01_12.27_dm17_scrm+gruntsxxxxx.wav	0.348	1338	2245	0.106	0.304598	1338	7077.9	5739.9	3994.1	1954.63	68.6	6.15e-05	2.01871	30.21	-2.56	2.52	3273	4823.4	5727.8
851	RDm17_01	511	Y	1	4	29	1	0	2	901	24	F	English	Y	Rhesus macaque, domestic cats	24	24	Y	NA	NA		NA	NA	NA	0.571429	0.69697	0.512821	Dm_scrm_9.12.16_03_8.10_scrm	Hair_11.14.16_01_12.27_dm17_scrm+gruntsxxxxx	Hair_11.14.16_01_12.27_dm17_scrm+gruntsxxxxx.wav	0.348	1338	2245	0.106	0.304598	1338	7077.9	5739.9	3994.1	1954.63	68.6	6.15e-05	2.01871	30.21	-2.56	2.52	3273	4823.4	5727.8
852	RDm17_01	37	N	1	4	35	1	0	2	590	19	F	Spanish	N			NA	Y	44	32		NA	NA	NA	0.52381	0.606061	0.641026	Dm_scrm_9.12.16_03_8.10_scrm	Hair_11.14.16_01_12.27_dm17_scrm+gruntsxxxxx	Hair_11.14.16_01_12.27_dm17_scrm+gruntsxxxxx.wav	0.348	1338	2245	0.106	0.304598	1338	7077.9	5739.9	3994.1	1954.63	68.6	6.15e-05	2.01871	30.21	-2.56	2.52	3273	4823.4	5727.8
853	RDm17_01	513	Y	1	3	33	1	1	1	1093	53	F	English	Y	chimps, bonobos, Rhesus macaque, Sooty mangabeys, pigtail macaque, gibbons, orangutan, stumptail macaques, baboons	288	288	Y	NA	NA		NA	NA	NA	0.535714	0.969697	0.589744	Dm_scrm_9.12.16_03_8.10_scrm	Hair_11.14.16_01_12.27_dm17_scrm+gruntsxxxxx	Hair_11.14.16_01_12.27_dm17_scrm+gruntsxxxxx.wav	0.348	1338	2245	0.106	0.304598	1338	7077.9	5739.9	3994.1	1954.63	68.6	6.15e-05	2.01871	30.21	-2.56	2.52	3273	4823.4	5727.8
854	RDm17_01	509	Y	1	2	1	1	1	1	1016	28	M	Spanish/English	Y	Rhesus macaque, mangabey	48	48	Y	NA	NA		NA	NA	NA	0.464286	0.969697	0.615385	Dm_scrm_9.12.16_03_8.10_scrm	Hair_11.14.16_01_12.27_dm17_scrm+gruntsxxxxx	Hair_11.14.16_01_12.27_dm17_scrm+gruntsxxxxx.wav	0.348	1338	2245	0.106	0.304598	1338	7077.9	5739.9	3994.1	1954.63	68.6	6.15e-05	2.01871	30.21	-2.56	2.52	3273	4823.4	5727.8
855	RDm17_01	99	N	1	2	39	1	1	1	1069	19	F	English + Hindi	N			NA	Y	56	37		37	39	76	0.595238	0.30303	0.461538	Dm_scrm_9.12.16_03_8.10_scrm	Hair_11.14.16_01_12.27_dm17_scrm+gruntsxxxxx	Hair_11.14.16_01_12.27_dm17_scrm+gruntsxxxxx.wav	0.348	1338	2245	0.106	0.304598	1338	7077.9	5739.9	3994.1	1954.63	68.6	6.15e-05	2.01871	30.21	-2.56	2.52	3273	4823.4	5727.8
856	RDm17_01	28	N	1	3	29	1	0	2	139	40	F	English	N			NA	Y	50	33		42	NA	NA	0.630952	0.606061	0.564103	Dm_scrm_9.12.16_03_8.10_scrm	Hair_11.14.16_01_12.27_dm17_scrm+gruntsxxxxx	Hair_11.14.16_01_12.27_dm17_scrm+gruntsxxxxx.wav	0.348	1338	2245	0.106	0.304598	1338	7077.9	5739.9	3994.1	1954.63	68.6	6.15e-05	2.01871	30.21	-2.56	2.52	3273	4823.4	5727.8
857	RDm17_01	108	N	1	4	14	1	1	1	1420	19	M	English	N			NA	N	59	24		45	43	88	0.571429	0.393939	0.435897	Dm_scrm_9.12.16_03_8.10_scrm	Hair_11.14.16_01_12.27_dm17_scrm+gruntsxxxxx	Hair_11.14.16_01_12.27_dm17_scrm+gruntsxxxxx.wav	0.348	1338	2245	0.106	0.304598	1338	7077.9	5739.9	3994.1	1954.63	68.6	6.15e-05	2.01871	30.21	-2.56	2.52	3273	4823.4	5727.8
858	RDm17_01	502	Y	1	4	26	1	1	1	1050	39	F	English	Y	Rhesus, pigrails, gorillas, orangutans, lemurs	216	204	Y	63	30		45	43	88	0.642857	0.909091	0.666667	Dm_scrm_9.12.16_03_8.10_scrm	Hair_11.14.16_01_12.27_dm17_scrm+gruntsxxxxx	Hair_11.14.16_01_12.27_dm17_scrm+gruntsxxxxx.wav	0.348	1338	2245	0.106	0.304598	1338	7077.9	5739.9	3994.1	1954.63	68.6	6.15e-05	2.01871	30.21	-2.56	2.52	3273	4823.4	5727.8
859	RDm17_01	5	N	1	1	18	1	1	1	1497	29	F	English	Y	cat, dog, horse, cow	6+ years	NA	Y	41	35		46	49	95	0.583333	0.393939	0.564103	Dm_scrm_9.12.16_03_8.10_scrm	Hair_11.14.16_01_12.27_dm17_scrm+gruntsxxxxx	Hair_11.14.16_01_12.27_dm17_scrm+gruntsxxxxx.wav	0.348	1338	2245	0.106	0.304598	1338	7077.9	5739.9	3994.1	1954.63	68.6	6.15e-05	2.01871	30.21	-2.56	2.52	3273	4823.4	5727.8
860	RDm17_01	43	N	1	1	1	1	0	2	524	19	M	English	N			NA	Y	37	39		36	40	76	0.595238	0.666667	0.589744	Dm_scrm_9.12.16_03_8.10_scrm	Hair_11.14.16_01_12.27_dm17_scrm+gruntsxxxxx	Hair_11.14.16_01_12.27_dm17_scrm+gruntsxxxxx.wav	0.348	1338	2245	0.106	0.304598	1338	7077.9	5739.9	3994.1	1954.63	68.6	6.15e-05	2.01871	30.21	-2.56	2.52	3273	4823.4	5727.8
861	RDm17_01	98	N	1	1	38	1	1	1	551	18	F	English	N			NA	Y	36	39		37	48	85	0.690476	0.393939	0.538462	Dm_scrm_9.12.16_03_8.10_scrm	Hair_11.14.16_01_12.27_dm17_scrm+gruntsxxxxx	Hair_11.14.16_01_12.27_dm17_scrm+gruntsxxxxx.wav	0.348	1338	2245	0.106	0.304598	1338	7077.9	5739.9	3994.1	1954.63	68.6	6.15e-05	2.01871	30.21	-2.56	2.52	3273	4823.4	5727.8
862	RDm17_01	74	N	1	3	32	1	0	2	674	19	F	English	Y	cats, dogs	1	NA	Y	47	41		41	43	84	0.428571	0.272727	0.538462	Dm_scrm_9.12.16_03_8.10_scrm	Hair_11.14.16_01_12.27_dm17_scrm+gruntsxxxxx	Hair_11.14.16_01_12.27_dm17_scrm+gruntsxxxxx.wav	0.348	1338	2245	0.106	0.304598	1338	7077.9	5739.9	3994.1	1954.63	68.6	6.15e-05	2.01871	30.21	-2.56	2.52	3273	4823.4	5727.8
863	RDm17_01	29	N	1	3	17	1	1	1	607	19	F	English	Y	dogs, cats	3	NA	Y	63	44		47	41	88	0.547619	0.454545	0.512821	Dm_scrm_9.12.16_03_8.10_scrm	Hair_11.14.16_01_12.27_dm17_scrm+gruntsxxxxx	Hair_11.14.16_01_12.27_dm17_scrm+gruntsxxxxx.wav	0.348	1338	2245	0.106	0.304598	1338	7077.9	5739.9	3994.1	1954.63	68.6	6.15e-05	2.01871	30.21	-2.56	2.52	3273	4823.4	5727.8
864	RDm17_01	70	N	1	1	29	1	1	1	197	18	F	English	N			NA	Y	62	34		48	45	93	0.52381	0.242424	0.384615	Dm_scrm_9.12.16_03_8.10_scrm	Hair_11.14.16_01_12.27_dm17_scrm+gruntsxxxxx	Hair_11.14.16_01_12.27_dm17_scrm+gruntsxxxxx.wav	0.348	1338	2245	0.106	0.304598	1338	7077.9	5739.9	3994.1	1954.63	68.6	6.15e-05	2.01871	30.21	-2.56	2.52	3273	4823.4	5727.8
865	RDm17_01	112	N	1	3	28	1	0	2	2761	18	M	Turkish	N			NA	Y	55	40		NA	NA	NA	0.535714	0.424242	0.461538	Dm_scrm_9.12.16_03_8.10_scrm	Hair_11.14.16_01_12.27_dm17_scrm+gruntsxxxxx	Hair_11.14.16_01_12.27_dm17_scrm+gruntsxxxxx.wav	0.348	1338	2245	0.106	0.304598	1338	7077.9	5739.9	3994.1	1954.63	68.6	6.15e-05	2.01871	30.21	-2.56	2.52	3273	4823.4	5727.8
866	RDm17_01	24	N	1	4	32	1	0	2	615	20	M	English	N			NA	N	41	24		35	36	71	0.404762	0.363636	0.666667	Dm_scrm_9.12.16_03_8.10_scrm	Hair_11.14.16_01_12.27_dm17_scrm+gruntsxxxxx	Hair_11.14.16_01_12.27_dm17_scrm+gruntsxxxxx.wav	0.348	1338	2245	0.106	0.304598	1338	7077.9	5739.9	3994.1	1954.63	68.6	6.15e-05	2.01871	30.21	-2.56	2.52	3273	4823.4	5727.8
867	RDm17_01	86	N	1	3	7	1	1	1	687	22	M	Chinese	N			NA	Y	44	35		NA	NA	NA	0.666667	0.515152	0.641026	Dm_scrm_9.12.16_03_8.10_scrm	Hair_11.14.16_01_12.27_dm17_scrm+gruntsxxxxx	Hair_11.14.16_01_12.27_dm17_scrm+gruntsxxxxx.wav	0.348	1338	2245	0.106	0.304598	1338	7077.9	5739.9	3994.1	1954.63	68.6	6.15e-05	2.01871	30.21	-2.56	2.52	3273	4823.4	5727.8
868	RDm17_01	12	N	1	1	31	1	0	2	277	21	M	Chinese	N			NA	Y	41	34		NA	NA	NA	0.642857	0.484848	0.410256	Dm_scrm_9.12.16_03_8.10_scrm	Hair_11.14.16_01_12.27_dm17_scrm+gruntsxxxxx	Hair_11.14.16_01_12.27_dm17_scrm+gruntsxxxxx.wav	0.348	1338	2245	0.106	0.304598	1338	7077.9	5739.9	3994.1	1954.63	68.6	6.15e-05	2.01871	30.21	-2.56	2.52	3273	4823.4	5727.8
869	RDm17_01	79	N	1	2	9	1	1	1	312	21	M	English	N			NA	Y	55	38		33	34	67	0.571429	0.393939	0.564103	Dm_scrm_9.12.16_03_8.10_scrm	Hair_11.14.16_01_12.27_dm17_scrm+gruntsxxxxx	Hair_11.14.16_01_12.27_dm17_scrm+gruntsxxxxx.wav	0.348	1338	2245	0.106	0.304598	1338	7077.9	5739.9	3994.1	1954.63	68.6	6.15e-05	2.01871	30.21	-2.56	2.52	3273	4823.4	5727.8
870	RDm17_01	76	N	1	2	14	1	0	2	336	19	F	Chinese	N			NA	Y	41	41		NA	NA	NA	0.630952	0.393939	0.538462	Dm_scrm_9.12.16_03_8.10_scrm	Hair_11.14.16_01_12.27_dm17_scrm+gruntsxxxxx	Hair_11.14.16_01_12.27_dm17_scrm+gruntsxxxxx.wav	0.348	1338	2245	0.106	0.304598	1338	7077.9	5739.9	3994.1	1954.63	68.6	6.15e-05	2.01871	30.21	-2.56	2.52	3273	4823.4	5727.8
871	RDm17_01	10	N	1	2	27	1	0	2	4149	21	F	English	N			NA	Y	50	38		36	38	74	0.559524	0.757576	0.358974	Dm_scrm_9.12.16_03_8.10_scrm	Hair_11.14.16_01_12.27_dm17_scrm+gruntsxxxxx	Hair_11.14.16_01_12.27_dm17_scrm+gruntsxxxxx.wav	0.348	1338	2245	0.106	0.304598	1338	7077.9	5739.9	3994.1	1954.63	68.6	6.15e-05	2.01871	30.21	-2.56	2.52	3273	4823.4	5727.8
872	RDm17_01	75	N	1	4	6	1	0	2	567	19	M	Chinese	Y	fruitfly, termites	1.5	NA	N	58	38		NA	NA	NA	0.547619	0.484848	0.461538	Dm_scrm_9.12.16_03_8.10_scrm	Hair_11.14.16_01_12.27_dm17_scrm+gruntsxxxxx	Hair_11.14.16_01_12.27_dm17_scrm+gruntsxxxxx.wav	0.348	1338	2245	0.106	0.304598	1338	7077.9	5739.9	3994.1	1954.63	68.6	6.15e-05	2.01871	30.21	-2.56	2.52	3273	4823.4	5727.8
873	RDm17_01	32	N	1	3	22	1	1	1	621	23	F	English	N			NA	N	58	26		34	33	67	0.559524	0.424242	0.435897	Dm_scrm_9.12.16_03_8.10_scrm	Hair_11.14.16_01_12.27_dm17_scrm+gruntsxxxxx	Hair_11.14.16_01_12.27_dm17_scrm+gruntsxxxxx.wav	0.348	1338	2245	0.106	0.304598	1338	7077.9	5739.9	3994.1	1954.63	68.6	6.15e-05	2.01871	30.21	-2.56	2.52	3273	4823.4	5727.8
874	RDm17_01	21	N	1	2	8	1	1	1	344	20	F	English	Y	dogs	6	NA	Y	44	37		41	34	75	0.630952	0.787879	0.384615	Dm_scrm_9.12.16_03_8.10_scrm	Hair_11.14.16_01_12.27_dm17_scrm+gruntsxxxxx	Hair_11.14.16_01_12.27_dm17_scrm+gruntsxxxxx.wav	0.348	1338	2245	0.106	0.304598	1338	7077.9	5739.9	3994.1	1954.63	68.6	6.15e-05	2.01871	30.21	-2.56	2.52	3273	4823.4	5727.8
875	RDm17_01	55	N	1	1	13	1	0	2	618	18	F	Mandarin	N			NA	Y	64	30		NA	NA	NA	0.690476	0.515152	0.410256	Dm_scrm_9.12.16_03_8.10_scrm	Hair_11.14.16_01_12.27_dm17_scrm+gruntsxxxxx	Hair_11.14.16_01_12.27_dm17_scrm+gruntsxxxxx.wav	0.348	1338	2245	0.106	0.304598	1338	7077.9	5739.9	3994.1	1954.63	68.6	6.15e-05	2.01871	30.21	-2.56	2.52	3273	4823.4	5727.8
876	RDm17_02	74	N	1	3	27	2	1	2	952	19	F	English	Y	cats, dogs	1	NA	Y	47	41		41	43	84	0.428571	0.272727	0.538462	Dm_scrm_9.12.16_03_8.10_scrm	Hair_11.14.16_01_13.55_dm17_scrm_clipped	Dm_scrm_9.12.16_03_8.10_scrm.wav	0.319	2529	2576	0.196	0.61442	2528.9	4990.5	2461.6	3544.5	879.86	78.1	2.03e-05	1.9185	28.48	-1.59	2.33	3186.9	5081.8	8268.8
877	RDm17_02	75	N	1	4	30	2	0	1	1044	19	M	Chinese	Y	fruitfly, termites	1.5	NA	N	58	38		NA	NA	NA	0.547619	0.484848	0.461538	Dm_scrm_9.12.16_03_8.10_scrm	Hair_11.14.16_01_13.55_dm17_scrm_clipped	Dm_scrm_9.12.16_03_8.10_scrm.wav	0.319	2529	2576	0.196	0.61442	2528.9	4990.5	2461.6	3544.5	879.86	78.1	2.03e-05	1.9185	28.48	-1.59	2.33	3186.9	5081.8	8268.8
878	RDm17_02	506	Y	1	3	11	2	0	1	494	37	F	English	Y	Rhesus macaque	120	120	Y	NA	NA		NA	NA	NA	0.559524	0.424242	0.487179	Dm_scrm_9.12.16_03_8.10_scrm	Hair_11.14.16_01_13.55_dm17_scrm_clipped	Dm_scrm_9.12.16_03_8.10_scrm.wav	0.319	2529	2576	0.196	0.61442	2528.9	4990.5	2461.6	3544.5	879.86	78.1	2.03e-05	1.9185	28.48	-1.59	2.33	3186.9	5081.8	8268.8
879	RDm17_02	50	N	1	3	18	2	1	2	322	19	F	English	Y	dogs, cats	12	NA	Y	53	40		24	19	43	0.5	0.212121	0.512821	Dm_scrm_9.12.16_03_8.10_scrm	Hair_11.14.16_01_13.55_dm17_scrm_clipped	Dm_scrm_9.12.16_03_8.10_scrm.wav	0.319	2529	2576	0.196	0.61442	2528.9	4990.5	2461.6	3544.5	879.86	78.1	2.03e-05	1.9185	28.48	-1.59	2.33	3186.9	5081.8	8268.8
880	RDm17_02	17	N	1	4	14	2	0	1	994	19	F	Chinese	N			NA	Y	49	34		NA	NA	NA	0.595238	1	0.487179	Dm_scrm_9.12.16_03_8.10_scrm	Hair_11.14.16_01_13.55_dm17_scrm_clipped	Dm_scrm_9.12.16_03_8.10_scrm.wav	0.319	2529	2576	0.196	0.61442	2528.9	4990.5	2461.6	3544.5	879.86	78.1	2.03e-05	1.9185	28.48	-1.59	2.33	3186.9	5081.8	8268.8
881	RDm17_02	509	Y	1	2	15	2	1	2	355	28	M	Spanish/English	Y	Rhesus macaque, mangabey	48	48	Y	NA	NA		NA	NA	NA	0.464286	0.969697	0.615385	Dm_scrm_9.12.16_03_8.10_scrm	Hair_11.14.16_01_13.55_dm17_scrm_clipped	Dm_scrm_9.12.16_03_8.10_scrm.wav	0.319	2529	2576	0.196	0.61442	2528.9	4990.5	2461.6	3544.5	879.86	78.1	2.03e-05	1.9185	28.48	-1.59	2.33	3186.9	5081.8	8268.8
882	RDm17_02	34	N	1	1	8	2	0	1	122	24	M	Mandarin	N			NA	N	15	37		NA	NA	NA	0.511905	0.757576	0.282051	Dm_scrm_9.12.16_03_8.10_scrm	Hair_11.14.16_01_13.55_dm17_scrm_clipped	Dm_scrm_9.12.16_03_8.10_scrm.wav	0.319	2529	2576	0.196	0.61442	2528.9	4990.5	2461.6	3544.5	879.86	78.1	2.03e-05	1.9185	28.48	-1.59	2.33	3186.9	5081.8	8268.8
883	RDm17_02	94	N	1	3	14	2	0	1	409	20	F	English	N			NA	Y	45	44		40	44	84	0.72619	0.878788	0.410256	Dm_scrm_9.12.16_03_8.10_scrm	Hair_11.14.16_01_13.55_dm17_scrm_clipped	Dm_scrm_9.12.16_03_8.10_scrm.wav	0.319	2529	2576	0.196	0.61442	2528.9	4990.5	2461.6	3544.5	879.86	78.1	2.03e-05	1.9185	28.48	-1.59	2.33	3186.9	5081.8	8268.8
884	RDm17_02	48	N	1	3	25	2	0	1	621	19	F	English	N			NA	Y	33	36		36	46	82	0.654762	0.606061	0.564103	Dm_scrm_9.12.16_03_8.10_scrm	Hair_11.14.16_01_13.55_dm17_scrm_clipped	Dm_scrm_9.12.16_03_8.10_scrm.wav	0.319	2529	2576	0.196	0.61442	2528.9	4990.5	2461.6	3544.5	879.86	78.1	2.03e-05	1.9185	28.48	-1.59	2.33	3186.9	5081.8	8268.8
885	RDm17_02	31	N	1	2	8	2	0	1	904	18	F	English	N			NA	Y	47	35		38	40	78	0.583333	0.575758	0.384615	Dm_scrm_9.12.16_03_8.10_scrm	Hair_11.14.16_01_13.55_dm17_scrm_clipped	Dm_scrm_9.12.16_03_8.10_scrm.wav	0.319	2529	2576	0.196	0.61442	2528.9	4990.5	2461.6	3544.5	879.86	78.1	2.03e-05	1.9185	28.48	-1.59	2.33	3186.9	5081.8	8268.8
886	RDm17_02	20	Y	1	3	29	2	1	2	826	37	F	English	Y	Rhesus, chimpanzees, dogs, cats, mice, rats	180	132	Y	52	33		46	47	93	0.392857	0.454545	0.589744	Dm_scrm_9.12.16_03_8.10_scrm	Hair_11.14.16_01_13.55_dm17_scrm_clipped	Dm_scrm_9.12.16_03_8.10_scrm.wav	0.319	2529	2576	0.196	0.61442	2528.9	4990.5	2461.6	3544.5	879.86	78.1	2.03e-05	1.9185	28.48	-1.59	2.33	3186.9	5081.8	8268.8
887	RDm17_02	38	N	1	3	15	2	1	2	259	18	F	English	N			NA	Y	57	36		41	41	82	0.619048	0.606061	0.615385	Dm_scrm_9.12.16_03_8.10_scrm	Hair_11.14.16_01_13.55_dm17_scrm_clipped	Dm_scrm_9.12.16_03_8.10_scrm.wav	0.319	2529	2576	0.196	0.61442	2528.9	4990.5	2461.6	3544.5	879.86	78.1	2.03e-05	1.9185	28.48	-1.59	2.33	3186.9	5081.8	8268.8
888	RDm17_02	37	N	1	4	12	2	1	2	372	19	F	Spanish	N			NA	Y	44	32		NA	NA	NA	0.52381	0.606061	0.641026	Dm_scrm_9.12.16_03_8.10_scrm	Hair_11.14.16_01_13.55_dm17_scrm_clipped	Dm_scrm_9.12.16_03_8.10_scrm.wav	0.319	2529	2576	0.196	0.61442	2528.9	4990.5	2461.6	3544.5	879.86	78.1	2.03e-05	1.9185	28.48	-1.59	2.33	3186.9	5081.8	8268.8
889	RDm17_02	105	N	1	4	24	2	0	1	198	19	F	English	N			NA	Y	44	36		40	42	82	0.571429	0.606061	0.435897	Dm_scrm_9.12.16_03_8.10_scrm	Hair_11.14.16_01_13.55_dm17_scrm_clipped	Dm_scrm_9.12.16_03_8.10_scrm.wav	0.319	2529	2576	0.196	0.61442	2528.9	4990.5	2461.6	3544.5	879.86	78.1	2.03e-05	1.9185	28.48	-1.59	2.33	3186.9	5081.8	8268.8
890	RDm17_02	33	N	1	3	18	2	1	2	382	19	F	Mandarin + English	N			NA	Y	56	33		NA	NA	NA	0.571429	0.272727	0.615385	Dm_scrm_9.12.16_03_8.10_scrm	Hair_11.14.16_01_13.55_dm17_scrm_clipped	Dm_scrm_9.12.16_03_8.10_scrm.wav	0.319	2529	2576	0.196	0.61442	2528.9	4990.5	2461.6	3544.5	879.86	78.1	2.03e-05	1.9185	28.48	-1.59	2.33	3186.9	5081.8	8268.8
891	RDm17_02	97	N	1	3	14	2	1	2	1169	19	F	English	N			NA	Y	48	28		40	43	83	0.595238	0.606061	0.487179	Dm_scrm_9.12.16_03_8.10_scrm	Hair_11.14.16_01_13.55_dm17_scrm_clipped	Dm_scrm_9.12.16_03_8.10_scrm.wav	0.319	2529	2576	0.196	0.61442	2528.9	4990.5	2461.6	3544.5	879.86	78.1	2.03e-05	1.9185	28.48	-1.59	2.33	3186.9	5081.8	8268.8
892	RDm17_02	10	N	1	2	6	2	0	1	4354	21	F	English	N			NA	Y	50	38		36	38	74	0.559524	0.757576	0.358974	Dm_scrm_9.12.16_03_8.10_scrm	Hair_11.14.16_01_13.55_dm17_scrm_clipped	Dm_scrm_9.12.16_03_8.10_scrm.wav	0.319	2529	2576	0.196	0.61442	2528.9	4990.5	2461.6	3544.5	879.86	78.1	2.03e-05	1.9185	28.48	-1.59	2.33	3186.9	5081.8	8268.8
893	RDm17_02	99	N	1	2	19	2	0	1	1240	19	F	English + Hindi	N			NA	Y	56	37		37	39	76	0.595238	0.30303	0.461538	Dm_scrm_9.12.16_03_8.10_scrm	Hair_11.14.16_01_13.55_dm17_scrm_clipped	Dm_scrm_9.12.16_03_8.10_scrm.wav	0.319	2529	2576	0.196	0.61442	2528.9	4990.5	2461.6	3544.5	879.86	78.1	2.03e-05	1.9185	28.48	-1.59	2.33	3186.9	5081.8	8268.8
894	RDm17_02	95	N	1	1	18	2	1	2	364	20	F	English	N			NA	Y	57	30		39	44	83	0.571429	0.363636	0.564103	Dm_scrm_9.12.16_03_8.10_scrm	Hair_11.14.16_01_13.55_dm17_scrm_clipped	Dm_scrm_9.12.16_03_8.10_scrm.wav	0.319	2529	2576	0.196	0.61442	2528.9	4990.5	2461.6	3544.5	879.86	78.1	2.03e-05	1.9185	28.48	-1.59	2.33	3186.9	5081.8	8268.8
895	RDm17_02	24	N	1	4	9	2	1	2	305	20	M	English	N			NA	N	41	24		35	36	71	0.404762	0.363636	0.666667	Dm_scrm_9.12.16_03_8.10_scrm	Hair_11.14.16_01_13.55_dm17_scrm_clipped	Dm_scrm_9.12.16_03_8.10_scrm.wav	0.319	2529	2576	0.196	0.61442	2528.9	4990.5	2461.6	3544.5	879.86	78.1	2.03e-05	1.9185	28.48	-1.59	2.33	3186.9	5081.8	8268.8
896	RDm17_02	62	N	1	1	21	2	1	2	302	18	F	English	Y	mice	1	NA	Y	59	32		46	40	86	0.559524	0.484848	0.538462	Dm_scrm_9.12.16_03_8.10_scrm	Hair_11.14.16_01_13.55_dm17_scrm_clipped	Dm_scrm_9.12.16_03_8.10_scrm.wav	0.319	2529	2576	0.196	0.61442	2528.9	4990.5	2461.6	3544.5	879.86	78.1	2.03e-05	1.9185	28.48	-1.59	2.33	3186.9	5081.8	8268.8
897	RDm17_02	60	N	1	1	5	2	1	2	687	18	F	Chinese	N			NA	Y	54	33		NA	NA	NA	0.595238	0.69697	0.615385	Dm_scrm_9.12.16_03_8.10_scrm	Hair_11.14.16_01_13.55_dm17_scrm_clipped	Dm_scrm_9.12.16_03_8.10_scrm.wav	0.319	2529	2576	0.196	0.61442	2528.9	4990.5	2461.6	3544.5	879.86	78.1	2.03e-05	1.9185	28.48	-1.59	2.33	3186.9	5081.8	8268.8
898	RDm17_02	103	N	1	1	34	2	1	2	382	19	F	Korean + English	Y	dogs, cats	3	NA	Y	47	39		40	41	81	0.52381	0.393939	0.512821	Dm_scrm_9.12.16_03_8.10_scrm	Hair_11.14.16_01_13.55_dm17_scrm_clipped	Dm_scrm_9.12.16_03_8.10_scrm.wav	0.319	2529	2576	0.196	0.61442	2528.9	4990.5	2461.6	3544.5	879.86	78.1	2.03e-05	1.9185	28.48	-1.59	2.33	3186.9	5081.8	8268.8
899	RDm17_02	77	N	1	4	22	2	0	1	596	19	M	Chinese	N			NA	Y	46	18		NA	NA	NA	0.595238	0.454545	0.538462	Dm_scrm_9.12.16_03_8.10_scrm	Hair_11.14.16_01_13.55_dm17_scrm_clipped	Dm_scrm_9.12.16_03_8.10_scrm.wav	0.319	2529	2576	0.196	0.61442	2528.9	4990.5	2461.6	3544.5	879.86	78.1	2.03e-05	1.9185	28.48	-1.59	2.33	3186.9	5081.8	8268.8
900	RDm17_02	19	N	1	4	36	2	0	1	573	51	F	English	Y	mice	240	NA	Y	36	29		43	47	90	0.511905	0.575758	0.487179	Dm_scrm_9.12.16_03_8.10_scrm	Hair_11.14.16_01_13.55_dm17_scrm_clipped	Dm_scrm_9.12.16_03_8.10_scrm.wav	0.319	2529	2576	0.196	0.61442	2528.9	4990.5	2461.6	3544.5	879.86	78.1	2.03e-05	1.9185	28.48	-1.59	2.33	3186.9	5081.8	8268.8
901	RDm17_02	53	N	1	4	20	2	1	2	288	18	F	English	N			NA	N	71	47		22	17	39	0.642857	0.787879	0.641026	Dm_scrm_9.12.16_03_8.10_scrm	Hair_11.14.16_01_13.55_dm17_scrm_clipped	Dm_scrm_9.12.16_03_8.10_scrm.wav	0.319	2529	2576	0.196	0.61442	2528.9	4990.5	2461.6	3544.5	879.86	78.1	2.03e-05	1.9185	28.48	-1.59	2.33	3186.9	5081.8	8268.8
902	RDm17_02	109	N	1	2	14	2	0	1	474	20	F	English	N			NA	Y	41	33		45	43	88	0.666667	0.727273	0.384615	Dm_scrm_9.12.16_03_8.10_scrm	Hair_11.14.16_01_13.55_dm17_scrm_clipped	Dm_scrm_9.12.16_03_8.10_scrm.wav	0.319	2529	2576	0.196	0.61442	2528.9	4990.5	2461.6	3544.5	879.86	78.1	2.03e-05	1.9185	28.48	-1.59	2.33	3186.9	5081.8	8268.8
903	RDm17_02	113	N	1	1	39	2	1	2	2255	18	F	English	N			NA	Y	52	38		47	41	88	0.583333	0.848485	0.564103	Dm_scrm_9.12.16_03_8.10_scrm	Hair_11.14.16_01_13.55_dm17_scrm_clipped	Dm_scrm_9.12.16_03_8.10_scrm.wav	0.319	2529	2576	0.196	0.61442	2528.9	4990.5	2461.6	3544.5	879.86	78.1	2.03e-05	1.9185	28.48	-1.59	2.33	3186.9	5081.8	8268.8
904	RDm17_02	47	N	1	1	24	2	0	1	424	18	F	English	N			NA	Y	60	42		42	45	87	0.47619	0.30303	0.333333	Dm_scrm_9.12.16_03_8.10_scrm	Hair_11.14.16_01_13.55_dm17_scrm_clipped	Dm_scrm_9.12.16_03_8.10_scrm.wav	0.319	2529	2576	0.196	0.61442	2528.9	4990.5	2461.6	3544.5	879.86	78.1	2.03e-05	1.9185	28.48	-1.59	2.33	3186.9	5081.8	8268.8
905	RDm17_02	8	N	1	3	37	2	1	2	264	19	F	English	Y	dogs, cats	24	NA	Y	58	40		39	43	82	0.595238	0.363636	0.589744	Dm_scrm_9.12.16_03_8.10_scrm	Hair_11.14.16_01_13.55_dm17_scrm_clipped	Dm_scrm_9.12.16_03_8.10_scrm.wav	0.319	2529	2576	0.196	0.61442	2528.9	4990.5	2461.6	3544.5	879.86	78.1	2.03e-05	1.9185	28.48	-1.59	2.33	3186.9	5081.8	8268.8
906	RDm17_02	43	N	1	1	6	2	1	2	434	19	M	English	N			NA	Y	37	39		36	40	76	0.595238	0.666667	0.589744	Dm_scrm_9.12.16_03_8.10_scrm	Hair_11.14.16_01_13.55_dm17_scrm_clipped	Dm_scrm_9.12.16_03_8.10_scrm.wav	0.319	2529	2576	0.196	0.61442	2528.9	4990.5	2461.6	3544.5	879.86	78.1	2.03e-05	1.9185	28.48	-1.59	2.33	3186.9	5081.8	8268.8
907	RDm17_02	56	N	1	1	3	2	0	1	838	18	F	Chinese	N			NA	Y	31	30		NA	NA	NA	0.595238	0.575758	0.384615	Dm_scrm_9.12.16_03_8.10_scrm	Hair_11.14.16_01_13.55_dm17_scrm_clipped	Dm_scrm_9.12.16_03_8.10_scrm.wav	0.319	2529	2576	0.196	0.61442	2528.9	4990.5	2461.6	3544.5	879.86	78.1	2.03e-05	1.9185	28.48	-1.59	2.33	3186.9	5081.8	8268.8
908	RDm17_02	28	N	1	3	1	2	1	2	415	40	F	English	N			NA	Y	50	33		42	NA	NA	0.630952	0.606061	0.564103	Dm_scrm_9.12.16_03_8.10_scrm	Hair_11.14.16_01_13.55_dm17_scrm_clipped	Dm_scrm_9.12.16_03_8.10_scrm.wav	0.319	2529	2576	0.196	0.61442	2528.9	4990.5	2461.6	3544.5	879.86	78.1	2.03e-05	1.9185	28.48	-1.59	2.33	3186.9	5081.8	8268.8
909	RDm17_02	502	Y	1	4	10	2	1	2	639	39	F	English	Y	Rhesus, pigrails, gorillas, orangutans, lemurs	216	204	Y	63	30		45	43	88	0.642857	0.909091	0.666667	Dm_scrm_9.12.16_03_8.10_scrm	Hair_11.14.16_01_13.55_dm17_scrm_clipped	Dm_scrm_9.12.16_03_8.10_scrm.wav	0.319	2529	2576	0.196	0.61442	2528.9	4990.5	2461.6	3544.5	879.86	78.1	2.03e-05	1.9185	28.48	-1.59	2.33	3186.9	5081.8	8268.8
910	RDm17_02	66	N	1	1	3	2	1	2	2206	20	M	Chinese	N			NA	N	41	38		NA	NA	NA	0.47619	0.69697	0.512821	Dm_scrm_9.12.16_03_8.10_scrm	Hair_11.14.16_01_13.55_dm17_scrm_clipped	Dm_scrm_9.12.16_03_8.10_scrm.wav	0.319	2529	2576	0.196	0.61442	2528.9	4990.5	2461.6	3544.5	879.86	78.1	2.03e-05	1.9185	28.48	-1.59	2.33	3186.9	5081.8	8268.8
911	RDm17_02	29	N	1	3	35	2	0	1	5671	19	F	English	Y	dogs, cats	3	NA	Y	63	44		47	41	88	0.547619	0.454545	0.512821	Dm_scrm_9.12.16_03_8.10_scrm	Hair_11.14.16_01_13.55_dm17_scrm_clipped	Dm_scrm_9.12.16_03_8.10_scrm.wav	0.319	2529	2576	0.196	0.61442	2528.9	4990.5	2461.6	3544.5	879.86	78.1	2.03e-05	1.9185	28.48	-1.59	2.33	3186.9	5081.8	8268.8
912	RDm17_02	511	Y	1	4	12	2	0	1	458	24	F	English	Y	Rhesus macaque, domestic cats	24	24	Y	NA	NA		NA	NA	NA	0.571429	0.69697	0.512821	Dm_scrm_9.12.16_03_8.10_scrm	Hair_11.14.16_01_13.55_dm17_scrm_clipped	Dm_scrm_9.12.16_03_8.10_scrm.wav	0.319	2529	2576	0.196	0.61442	2528.9	4990.5	2461.6	3544.5	879.86	78.1	2.03e-05	1.9185	28.48	-1.59	2.33	3186.9	5081.8	8268.8
913	RDm17_02	27	N	1	1	33	2	0	1	535	23	F	Telugu	N			NA	N	32	44		NA	NA	NA	0.547619	0.151515	0.512821	Dm_scrm_9.12.16_03_8.10_scrm	Hair_11.14.16_01_13.55_dm17_scrm_clipped	Dm_scrm_9.12.16_03_8.10_scrm.wav	0.319	2529	2576	0.196	0.61442	2528.9	4990.5	2461.6	3544.5	879.86	78.1	2.03e-05	1.9185	28.48	-1.59	2.33	3186.9	5081.8	8268.8
914	RDm17_02	84	N	1	1	36	2	0	1	572	19	F	English	N			NA	Y	34	36		35	37	72	0.547619	0.575758	0.512821	Dm_scrm_9.12.16_03_8.10_scrm	Hair_11.14.16_01_13.55_dm17_scrm_clipped	Dm_scrm_9.12.16_03_8.10_scrm.wav	0.319	2529	2576	0.196	0.61442	2528.9	4990.5	2461.6	3544.5	879.86	78.1	2.03e-05	1.9185	28.48	-1.59	2.33	3186.9	5081.8	8268.8
915	RDm17_02	508	Y	1	1	22	2	1	2	1215	40	F	English	Y	Rhesus macaque, pigtail macaque, sooty mangabey	192	120	Y	NA	NA		NA	NA	NA	0.511905	0.969697	0.641026	Dm_scrm_9.12.16_03_8.10_scrm	Hair_11.14.16_01_13.55_dm17_scrm_clipped	Dm_scrm_9.12.16_03_8.10_scrm.wav	0.319	2529	2576	0.196	0.61442	2528.9	4990.5	2461.6	3544.5	879.86	78.1	2.03e-05	1.9185	28.48	-1.59	2.33	3186.9	5081.8	8268.8
916	RDm17_02	512	Y	1	1	2	2	1	2	641	39	M	English	Y	Rhesus macaque, pigtail macaque, common chimpanzee, west lowland gorilla, Sooty mangabey	144	144	Y	NA	NA	occasionally needed to answer radio during task	NA	NA	NA	0.642857	1	0.589744	Dm_scrm_9.12.16_03_8.10_scrm	Hair_11.14.16_01_13.55_dm17_scrm_clipped	Dm_scrm_9.12.16_03_8.10_scrm.wav	0.319	2529	2576	0.196	0.61442	2528.9	4990.5	2461.6	3544.5	879.86	78.1	2.03e-05	1.9185	28.48	-1.59	2.33	3186.9	5081.8	8268.8
917	RDm17_02	106	N	1	3	21	2	1	2	998	18	F	Korean	N			NA	Y	53	39		NA	NA	NA	0.607143	0.606061	0.461538	Dm_scrm_9.12.16_03_8.10_scrm	Hair_11.14.16_01_13.55_dm17_scrm_clipped	Dm_scrm_9.12.16_03_8.10_scrm.wav	0.319	2529	2576	0.196	0.61442	2528.9	4990.5	2461.6	3544.5	879.86	78.1	2.03e-05	1.9185	28.48	-1.59	2.33	3186.9	5081.8	8268.8
918	RDm17_02	76	N	1	2	25	2	0	1	858	19	F	Chinese	N			NA	Y	41	41		NA	NA	NA	0.630952	0.393939	0.538462	Dm_scrm_9.12.16_03_8.10_scrm	Hair_11.14.16_01_13.55_dm17_scrm_clipped	Dm_scrm_9.12.16_03_8.10_scrm.wav	0.319	2529	2576	0.196	0.61442	2528.9	4990.5	2461.6	3544.5	879.86	78.1	2.03e-05	1.9185	28.48	-1.59	2.33	3186.9	5081.8	8268.8
919	RDm17_02	52	N	1	3	33	2	1	2	505	19	F	English	N			NA	Y	55	38		42	43	85	0.619048	0.393939	0.512821	Dm_scrm_9.12.16_03_8.10_scrm	Hair_11.14.16_01_13.55_dm17_scrm_clipped	Dm_scrm_9.12.16_03_8.10_scrm.wav	0.319	2529	2576	0.196	0.61442	2528.9	4990.5	2461.6	3544.5	879.86	78.1	2.03e-05	1.9185	28.48	-1.59	2.33	3186.9	5081.8	8268.8
920	RDm17_02	32	N	1	3	32	2	0	1	445	23	F	English	N			NA	N	58	26		34	33	67	0.559524	0.424242	0.435897	Dm_scrm_9.12.16_03_8.10_scrm	Hair_11.14.16_01_13.55_dm17_scrm_clipped	Dm_scrm_9.12.16_03_8.10_scrm.wav	0.319	2529	2576	0.196	0.61442	2528.9	4990.5	2461.6	3544.5	879.86	78.1	2.03e-05	1.9185	28.48	-1.59	2.33	3186.9	5081.8	8268.8
921	RDm17_02	55	N	1	1	17	2	0	1	544	18	F	Mandarin	N			NA	Y	64	30		NA	NA	NA	0.690476	0.515152	0.410256	Dm_scrm_9.12.16_03_8.10_scrm	Hair_11.14.16_01_13.55_dm17_scrm_clipped	Dm_scrm_9.12.16_03_8.10_scrm.wav	0.319	2529	2576	0.196	0.61442	2528.9	4990.5	2461.6	3544.5	879.86	78.1	2.03e-05	1.9185	28.48	-1.59	2.33	3186.9	5081.8	8268.8
922	RDm17_02	14	N	1	4	13	2	1	2	1018	19	M	English and Mandarin	N			NA	N	43	35		32	39	71	0.642857	0.818182	0.615385	Dm_scrm_9.12.16_03_8.10_scrm	Hair_11.14.16_01_13.55_dm17_scrm_clipped	Dm_scrm_9.12.16_03_8.10_scrm.wav	0.319	2529	2576	0.196	0.61442	2528.9	4990.5	2461.6	3544.5	879.86	78.1	2.03e-05	1.9185	28.48	-1.59	2.33	3186.9	5081.8	8268.8
923	RDm17_02	65	N	1	4	6	2	0	1	685	20	F	Arabic	Y			NA	N	36	35		NA	NA	NA	0.559524	0.363636	0.564103	Dm_scrm_9.12.16_03_8.10_scrm	Hair_11.14.16_01_13.55_dm17_scrm_clipped	Dm_scrm_9.12.16_03_8.10_scrm.wav	0.319	2529	2576	0.196	0.61442	2528.9	4990.5	2461.6	3544.5	879.86	78.1	2.03e-05	1.9185	28.48	-1.59	2.33	3186.9	5081.8	8268.8
924	RDm17_02	513	Y	1	3	23	2	1	2	972	53	F	English	Y	chimps, bonobos, Rhesus macaque, Sooty mangabeys, pigtail macaque, gibbons, orangutan, stumptail macaques, baboons	288	288	Y	NA	NA		NA	NA	NA	0.535714	0.969697	0.589744	Dm_scrm_9.12.16_03_8.10_scrm	Hair_11.14.16_01_13.55_dm17_scrm_clipped	Dm_scrm_9.12.16_03_8.10_scrm.wav	0.319	2529	2576	0.196	0.61442	2528.9	4990.5	2461.6	3544.5	879.86	78.1	2.03e-05	1.9185	28.48	-1.59	2.33	3186.9	5081.8	8268.8
925	RDm17_02	85	N	1	2	9	2	0	1	2121	19	F	Chinese	N			NA	Y	25	32		NA	NA	NA	0.571429	0.363636	0.435897	Dm_scrm_9.12.16_03_8.10_scrm	Hair_11.14.16_01_13.55_dm17_scrm_clipped	Dm_scrm_9.12.16_03_8.10_scrm.wav	0.319	2529	2576	0.196	0.61442	2528.9	4990.5	2461.6	3544.5	879.86	78.1	2.03e-05	1.9185	28.48	-1.59	2.33	3186.9	5081.8	8268.8
926	RDm17_02	86	N	1	3	12	2	1	2	552	22	M	Chinese	N			NA	Y	44	35		NA	NA	NA	0.666667	0.515152	0.641026	Dm_scrm_9.12.16_03_8.10_scrm	Hair_11.14.16_01_13.55_dm17_scrm_clipped	Dm_scrm_9.12.16_03_8.10_scrm.wav	0.319	2529	2576	0.196	0.61442	2528.9	4990.5	2461.6	3544.5	879.86	78.1	2.03e-05	1.9185	28.48	-1.59	2.33	3186.9	5081.8	8268.8
927	RDm17_02	98	N	1	1	29	2	1	2	428	18	F	English	N			NA	Y	36	39		37	48	85	0.690476	0.393939	0.538462	Dm_scrm_9.12.16_03_8.10_scrm	Hair_11.14.16_01_13.55_dm17_scrm_clipped	Dm_scrm_9.12.16_03_8.10_scrm.wav	0.319	2529	2576	0.196	0.61442	2528.9	4990.5	2461.6	3544.5	879.86	78.1	2.03e-05	1.9185	28.48	-1.59	2.33	3186.9	5081.8	8268.8
928	RDm17_02	102	N	1	3	8	2	0	1	328	18	F	English	Y	elephants, dogs, tortoises	3	NA	Y	46	44		33	36	69	0.559524	0.424242	0.461538	Dm_scrm_9.12.16_03_8.10_scrm	Hair_11.14.16_01_13.55_dm17_scrm_clipped	Dm_scrm_9.12.16_03_8.10_scrm.wav	0.319	2529	2576	0.196	0.61442	2528.9	4990.5	2461.6	3544.5	879.86	78.1	2.03e-05	1.9185	28.48	-1.59	2.33	3186.9	5081.8	8268.8
929	RDm17_02	15	N	1	2	19	2	0	1	1960	20	F	English and Chinese	N			NA	Y	58	36	didn't make it to face - just voice	NA	36	NA	0.488095	0.393939	0.461538	Dm_scrm_9.12.16_03_8.10_scrm	Hair_11.14.16_01_13.55_dm17_scrm_clipped	Dm_scrm_9.12.16_03_8.10_scrm.wav	0.319	2529	2576	0.196	0.61442	2528.9	4990.5	2461.6	3544.5	879.86	78.1	2.03e-05	1.9185	28.48	-1.59	2.33	3186.9	5081.8	8268.8
930	RDm17_02	93	N	1	2	9	2	1	2	1845	19	F	English	N			NA	Y	53	37		38	38	76	0.52381	0.30303	0.487179	Dm_scrm_9.12.16_03_8.10_scrm	Hair_11.14.16_01_13.55_dm17_scrm_clipped	Dm_scrm_9.12.16_03_8.10_scrm.wav	0.319	2529	2576	0.196	0.61442	2528.9	4990.5	2461.6	3544.5	879.86	78.1	2.03e-05	1.9185	28.48	-1.59	2.33	3186.9	5081.8	8268.8
931	RDm17_02	7	N	1	4	23	2	0	1	874	21	F	English	N			NA	Y	49	33		44	43	87	0.583333	0.363636	0.615385	Dm_scrm_9.12.16_03_8.10_scrm	Hair_11.14.16_01_13.55_dm17_scrm_clipped	Dm_scrm_9.12.16_03_8.10_scrm.wav	0.319	2529	2576	0.196	0.61442	2528.9	4990.5	2461.6	3544.5	879.86	78.1	2.03e-05	1.9185	28.48	-1.59	2.33	3186.9	5081.8	8268.8
932	RDm17_02	49	N	1	3	2	2	1	2	662	18	F	English	N			NA	N	44	28		42	2	44	0.642857	0.454545	0.487179	Dm_scrm_9.12.16_03_8.10_scrm	Hair_11.14.16_01_13.55_dm17_scrm_clipped	Dm_scrm_9.12.16_03_8.10_scrm.wav	0.319	2529	2576	0.196	0.61442	2528.9	4990.5	2461.6	3544.5	879.86	78.1	2.03e-05	1.9185	28.48	-1.59	2.33	3186.9	5081.8	8268.8
933	RDm17_02	107	N	1	2	34	2	0	1	1402	22	F	Chinese	N			NA	N	21	37		NA	NA	NA	0.595238	0.424242	0.435897	Dm_scrm_9.12.16_03_8.10_scrm	Hair_11.14.16_01_13.55_dm17_scrm_clipped	Dm_scrm_9.12.16_03_8.10_scrm.wav	0.319	2529	2576	0.196	0.61442	2528.9	4990.5	2461.6	3544.5	879.86	78.1	2.03e-05	1.9185	28.48	-1.59	2.33	3186.9	5081.8	8268.8
934	RDm17_02	18	N	1	1	28	2	0	1	563	20	F	English	N			NA	Y	44	35		32	42	74	0.571429	0.151515	0.333333	Dm_scrm_9.12.16_03_8.10_scrm	Hair_11.14.16_01_13.55_dm17_scrm_clipped	Dm_scrm_9.12.16_03_8.10_scrm.wav	0.319	2529	2576	0.196	0.61442	2528.9	4990.5	2461.6	3544.5	879.86	78.1	2.03e-05	1.9185	28.48	-1.59	2.33	3186.9	5081.8	8268.8
935	RDm17_02	3	N	1	1	4	2	1	2	764	28	M	English	N			NA	Y	39	30		45	42	87	0.559524	0.575758	0.487179	Dm_scrm_9.12.16_03_8.10_scrm	Hair_11.14.16_01_13.55_dm17_scrm_clipped	Dm_scrm_9.12.16_03_8.10_scrm.wav	0.319	2529	2576	0.196	0.61442	2528.9	4990.5	2461.6	3544.5	879.86	78.1	2.03e-05	1.9185	28.48	-1.59	2.33	3186.9	5081.8	8268.8
936	RDm17_02	505	Y	1	3	39	2	1	2	1443	30	F	English	Y	Rhesus macaque, horses, dogs, cats, birds, mangabey	120	94	Y	NA	NA		NA	NA	NA	0.595238	1	0.589744	Dm_scrm_9.12.16_03_8.10_scrm	Hair_11.14.16_01_13.55_dm17_scrm_clipped	Dm_scrm_9.12.16_03_8.10_scrm.wav	0.319	2529	2576	0.196	0.61442	2528.9	4990.5	2461.6	3544.5	879.86	78.1	2.03e-05	1.9185	28.48	-1.59	2.33	3186.9	5081.8	8268.8
937	RDm17_02	23	N	1	2	12	2	1	2	678	20	F	Mandarin	N			NA	N	38	33		NA	NA	NA	0.52381	0.575758	0.564103	Dm_scrm_9.12.16_03_8.10_scrm	Hair_11.14.16_01_13.55_dm17_scrm_clipped	Dm_scrm_9.12.16_03_8.10_scrm.wav	0.319	2529	2576	0.196	0.61442	2528.9	4990.5	2461.6	3544.5	879.86	78.1	2.03e-05	1.9185	28.48	-1.59	2.33	3186.9	5081.8	8268.8
938	RDm17_02	72	N	1	1	39	2	1	2	228	19	F	English	N			NA	Y	48	33		35	31	66	0.511905	0.69697	0.538462	Dm_scrm_9.12.16_03_8.10_scrm	Hair_11.14.16_01_13.55_dm17_scrm_clipped	Dm_scrm_9.12.16_03_8.10_scrm.wav	0.319	2529	2576	0.196	0.61442	2528.9	4990.5	2461.6	3544.5	879.86	78.1	2.03e-05	1.9185	28.48	-1.59	2.33	3186.9	5081.8	8268.8
939	RDm17_02	22	N	1	4	11	2	1	2	2481	31	F	English	Y	dogs, cats	6	NA	Y	56	49		47	46	93	0.452381	0.515152	0.692308	Dm_scrm_9.12.16_03_8.10_scrm	Hair_11.14.16_01_13.55_dm17_scrm_clipped	Dm_scrm_9.12.16_03_8.10_scrm.wav	0.319	2529	2576	0.196	0.61442	2528.9	4990.5	2461.6	3544.5	879.86	78.1	2.03e-05	1.9185	28.48	-1.59	2.33	3186.9	5081.8	8268.8
940	RDm17_02	104	N	1	2	12	2	0	1	1531	19	F	Bangla	N			NA	N	49	31		NA	NA	NA	0.619048	0.363636	0.384615	Dm_scrm_9.12.16_03_8.10_scrm	Hair_11.14.16_01_13.55_dm17_scrm_clipped	Dm_scrm_9.12.16_03_8.10_scrm.wav	0.319	2529	2576	0.196	0.61442	2528.9	4990.5	2461.6	3544.5	879.86	78.1	2.03e-05	1.9185	28.48	-1.59	2.33	3186.9	5081.8	8268.8
941	RDm17_02	96	N	1	4	23	2	1	2	467	18	F	English	N			NA	Y	59	39		44	47	91	0.583333	0.727273	0.512821	Dm_scrm_9.12.16_03_8.10_scrm	Hair_11.14.16_01_13.55_dm17_scrm_clipped	Dm_scrm_9.12.16_03_8.10_scrm.wav	0.319	2529	2576	0.196	0.61442	2528.9	4990.5	2461.6	3544.5	879.86	78.1	2.03e-05	1.9185	28.48	-1.59	2.33	3186.9	5081.8	8268.8
942	RDm17_02	100	N	1	4	9	2	1	2	520	21	F	Mandarin	N			NA	Y	50	36		NA	NA	NA	0.619048	0.424242	0.641026	Dm_scrm_9.12.16_03_8.10_scrm	Hair_11.14.16_01_13.55_dm17_scrm_clipped	Dm_scrm_9.12.16_03_8.10_scrm.wav	0.319	2529	2576	0.196	0.61442	2528.9	4990.5	2461.6	3544.5	879.86	78.1	2.03e-05	1.9185	28.48	-1.59	2.33	3186.9	5081.8	8268.8
943	RDm17_02	5	N	1	1	31	2	1	2	476	29	F	English	Y	cat, dog, horse, cow	6+ years	NA	Y	41	35		46	49	95	0.583333	0.393939	0.564103	Dm_scrm_9.12.16_03_8.10_scrm	Hair_11.14.16_01_13.55_dm17_scrm_clipped	Dm_scrm_9.12.16_03_8.10_scrm.wav	0.319	2529	2576	0.196	0.61442	2528.9	4990.5	2461.6	3544.5	879.86	78.1	2.03e-05	1.9185	28.48	-1.59	2.33	3186.9	5081.8	8268.8
944	RDm17_02	68	N	1	4	36	2	1	2	344	19	M	Spanish	N			NA	N	48	NA	didn't fill out this questionnaire animal	NA	NA	NA	0.607143	0.333333	0.641026	Dm_scrm_9.12.16_03_8.10_scrm	Hair_11.14.16_01_13.55_dm17_scrm_clipped	Dm_scrm_9.12.16_03_8.10_scrm.wav	0.319	2529	2576	0.196	0.61442	2528.9	4990.5	2461.6	3544.5	879.86	78.1	2.03e-05	1.9185	28.48	-1.59	2.33	3186.9	5081.8	8268.8
945	RDm17_02	6	N	1	2	34	2	0	1	339	23	M	English	Y	mice	3	NA	Y	31	28		38	41	79	0.595238	0.484848	0.589744	Dm_scrm_9.12.16_03_8.10_scrm	Hair_11.14.16_01_13.55_dm17_scrm_clipped	Dm_scrm_9.12.16_03_8.10_scrm.wav	0.319	2529	2576	0.196	0.61442	2528.9	4990.5	2461.6	3544.5	879.86	78.1	2.03e-05	1.9185	28.48	-1.59	2.33	3186.9	5081.8	8268.8
946	RDm17_02	30	N	1	3	31	2	1	2	489	19	F	Chinese	N			NA	N	43	31		NA	NA	NA	0.535714	0.151515	0.641026	Dm_scrm_9.12.16_03_8.10_scrm	Hair_11.14.16_01_13.55_dm17_scrm_clipped	Dm_scrm_9.12.16_03_8.10_scrm.wav	0.319	2529	2576	0.196	0.61442	2528.9	4990.5	2461.6	3544.5	879.86	78.1	2.03e-05	1.9185	28.48	-1.59	2.33	3186.9	5081.8	8268.8
947	RDm17_02	115	N	1	1	34	2	1	2	554	18	M	Mandarin	N			NA	N	31	37		NA	NA	NA	0.583333	0.575758	0.461538	Dm_scrm_9.12.16_03_8.10_scrm	Hair_11.14.16_01_13.55_dm17_scrm_clipped	Dm_scrm_9.12.16_03_8.10_scrm.wav	0.319	2529	2576	0.196	0.61442	2528.9	4990.5	2461.6	3544.5	879.86	78.1	2.03e-05	1.9185	28.48	-1.59	2.33	3186.9	5081.8	8268.8
948	RDm17_02	61	N	1	3	26	2	1	2	389	19	M	English	N			NA	Y	42	36		43	35	78	0.619048	0.424242	0.461538	Dm_scrm_9.12.16_03_8.10_scrm	Hair_11.14.16_01_13.55_dm17_scrm_clipped	Dm_scrm_9.12.16_03_8.10_scrm.wav	0.319	2529	2576	0.196	0.61442	2528.9	4990.5	2461.6	3544.5	879.86	78.1	2.03e-05	1.9185	28.48	-1.59	2.33	3186.9	5081.8	8268.8
949	RDm17_02	39	N	1	4	16	2	1	2	292	19	F	Spanish/English	N			NA	Y	55	38		41	43	84	0.583333	0.454545	0.538462	Dm_scrm_9.12.16_03_8.10_scrm	Hair_11.14.16_01_13.55_dm17_scrm_clipped	Dm_scrm_9.12.16_03_8.10_scrm.wav	0.319	2529	2576	0.196	0.61442	2528.9	4990.5	2461.6	3544.5	879.86	78.1	2.03e-05	1.9185	28.48	-1.59	2.33	3186.9	5081.8	8268.8
950	RDm17_02	1	N	1	2	34	2	1	2	407	20	F	English	Y	cats, dogs	12	NA	Y	38	33		NA	40	NA	0.642857	0.333333	0.564103	Dm_scrm_9.12.16_03_8.10_scrm	Hair_11.14.16_01_13.55_dm17_scrm_clipped	Dm_scrm_9.12.16_03_8.10_scrm.wav	0.319	2529	2576	0.196	0.61442	2528.9	4990.5	2461.6	3544.5	879.86	78.1	2.03e-05	1.9185	28.48	-1.59	2.33	3186.9	5081.8	8268.8
951	RDm17_02	71	N	1	1	11	2	0	1	617	19	M	English	N			NA	Y	44	36		43	43	86	0.595238	0.424242	0.333333	Dm_scrm_9.12.16_03_8.10_scrm	Hair_11.14.16_01_13.55_dm17_scrm_clipped	Dm_scrm_9.12.16_03_8.10_scrm.wav	0.319	2529	2576	0.196	0.61442	2528.9	4990.5	2461.6	3544.5	879.86	78.1	2.03e-05	1.9185	28.48	-1.59	2.33	3186.9	5081.8	8268.8
952	RDm17_02	101	N	1	1	17	2	0	1	517	19	F	English	Y	mice	11	NA	Y	50	40		43	43	86	0.690476	0.484848	0.487179	Dm_scrm_9.12.16_03_8.10_scrm	Hair_11.14.16_01_13.55_dm17_scrm_clipped	Dm_scrm_9.12.16_03_8.10_scrm.wav	0.319	2529	2576	0.196	0.61442	2528.9	4990.5	2461.6	3544.5	879.86	78.1	2.03e-05	1.9185	28.48	-1.59	2.33	3186.9	5081.8	8268.8
953	RDm17_02	92	N	1	3	1	2	1	2	2216	18	F	English	N			NA	Y	45	30		36	36	72	0.595238	0.212121	0.589744	Dm_scrm_9.12.16_03_8.10_scrm	Hair_11.14.16_01_13.55_dm17_scrm_clipped	Dm_scrm_9.12.16_03_8.10_scrm.wav	0.319	2529	2576	0.196	0.61442	2528.9	4990.5	2461.6	3544.5	879.86	78.1	2.03e-05	1.9185	28.48	-1.59	2.33	3186.9	5081.8	8268.8
954	RDm17_02	73	N	1	2	2	2	1	2	1413	19	F	English and Chinese	N			NA	Y	41	37		34	36	70	0.571429	0.575758	0.538462	Dm_scrm_9.12.16_03_8.10_scrm	Hair_11.14.16_01_13.55_dm17_scrm_clipped	Dm_scrm_9.12.16_03_8.10_scrm.wav	0.319	2529	2576	0.196	0.61442	2528.9	4990.5	2461.6	3544.5	879.86	78.1	2.03e-05	1.9185	28.48	-1.59	2.33	3186.9	5081.8	8268.8
955	RDm17_02	108	N	1	4	4	2	1	2	233	19	M	English	N			NA	N	59	24		45	43	88	0.571429	0.393939	0.435897	Dm_scrm_9.12.16_03_8.10_scrm	Hair_11.14.16_01_13.55_dm17_scrm_clipped	Dm_scrm_9.12.16_03_8.10_scrm.wav	0.319	2529	2576	0.196	0.61442	2528.9	4990.5	2461.6	3544.5	879.86	78.1	2.03e-05	1.9185	28.48	-1.59	2.33	3186.9	5081.8	8268.8
956	RDm17_02	67	N	1	4	25	2	0	1	890	18	F	English	N			NA	N	29	44		32	32	64	0.75	0.636364	0.564103	Dm_scrm_9.12.16_03_8.10_scrm	Hair_11.14.16_01_13.55_dm17_scrm_clipped	Dm_scrm_9.12.16_03_8.10_scrm.wav	0.319	2529	2576	0.196	0.61442	2528.9	4990.5	2461.6	3544.5	879.86	78.1	2.03e-05	1.9185	28.48	-1.59	2.33	3186.9	5081.8	8268.8
957	RDm17_02	112	N	1	3	36	2	0	1	2518	18	M	Turkish	N			NA	Y	55	40		NA	NA	NA	0.535714	0.424242	0.461538	Dm_scrm_9.12.16_03_8.10_scrm	Hair_11.14.16_01_13.55_dm17_scrm_clipped	Dm_scrm_9.12.16_03_8.10_scrm.wav	0.319	2529	2576	0.196	0.61442	2528.9	4990.5	2461.6	3544.5	879.86	78.1	2.03e-05	1.9185	28.48	-1.59	2.33	3186.9	5081.8	8268.8
958	RDm17_02	110	N	1	4	9	2	1	2	433	19	M	English	N			NA	Y	40	32		35	38	73	0.511905	0.69697	0.564103	Dm_scrm_9.12.16_03_8.10_scrm	Hair_11.14.16_01_13.55_dm17_scrm_clipped	Dm_scrm_9.12.16_03_8.10_scrm.wav	0.319	2529	2576	0.196	0.61442	2528.9	4990.5	2461.6	3544.5	879.86	78.1	2.03e-05	1.9185	28.48	-1.59	2.33	3186.9	5081.8	8268.8
959	RDm17_02	42	N	1	1	32	2	1	2	397	19	F	English	N			NA	N	35	28		44	44	88	0.571429	0.454545	0.692308	Dm_scrm_9.12.16_03_8.10_scrm	Hair_11.14.16_01_13.55_dm17_scrm_clipped	Dm_scrm_9.12.16_03_8.10_scrm.wav	0.319	2529	2576	0.196	0.61442	2528.9	4990.5	2461.6	3544.5	879.86	78.1	2.03e-05	1.9185	28.48	-1.59	2.33	3186.9	5081.8	8268.8
960	RDm17_02	21	N	1	2	4	2	1	2	509	20	F	English	Y	dogs	6	NA	Y	44	37		41	34	75	0.630952	0.787879	0.384615	Dm_scrm_9.12.16_03_8.10_scrm	Hair_11.14.16_01_13.55_dm17_scrm_clipped	Dm_scrm_9.12.16_03_8.10_scrm.wav	0.319	2529	2576	0.196	0.61442	2528.9	4990.5	2461.6	3544.5	879.86	78.1	2.03e-05	1.9185	28.48	-1.59	2.33	3186.9	5081.8	8268.8
961	RDm17_02	69	N	1	1	8	2	0	1	1586	20	F	English	N			NA	Y	40	37		42	43	85	0.547619	0.424242	0.615385	Dm_scrm_9.12.16_03_8.10_scrm	Hair_11.14.16_01_13.55_dm17_scrm_clipped	Dm_scrm_9.12.16_03_8.10_scrm.wav	0.319	2529	2576	0.196	0.61442	2528.9	4990.5	2461.6	3544.5	879.86	78.1	2.03e-05	1.9185	28.48	-1.59	2.33	3186.9	5081.8	8268.8
962	RDm17_02	35	N	1	4	26	2	1	2	503	19	M	English	N			NA	N	40	21		44	39	83	0.666667	0.818182	0.641026	Dm_scrm_9.12.16_03_8.10_scrm	Hair_11.14.16_01_13.55_dm17_scrm_clipped	Dm_scrm_9.12.16_03_8.10_scrm.wav	0.319	2529	2576	0.196	0.61442	2528.9	4990.5	2461.6	3544.5	879.86	78.1	2.03e-05	1.9185	28.48	-1.59	2.33	3186.9	5081.8	8268.8
963	RDm17_02	80	N	1	1	15	2	0	1	747	18	F	English	N			NA	Y	57	34		36	3	39	0.607143	0.545455	0.358974	Dm_scrm_9.12.16_03_8.10_scrm	Hair_11.14.16_01_13.55_dm17_scrm_clipped	Dm_scrm_9.12.16_03_8.10_scrm.wav	0.319	2529	2576	0.196	0.61442	2528.9	4990.5	2461.6	3544.5	879.86	78.1	2.03e-05	1.9185	28.48	-1.59	2.33	3186.9	5081.8	8268.8
964	RDm17_02	64	N	1	2	29	2	1	2	1180	18	F	English	N			NA	N	55	36		40	42	82	0.654762	0.393939	0.666667	Dm_scrm_9.12.16_03_8.10_scrm	Hair_11.14.16_01_13.55_dm17_scrm_clipped	Dm_scrm_9.12.16_03_8.10_scrm.wav	0.319	2529	2576	0.196	0.61442	2528.9	4990.5	2461.6	3544.5	879.86	78.1	2.03e-05	1.9185	28.48	-1.59	2.33	3186.9	5081.8	8268.8
965	RDm17_02	4	N	1	2	12	2	0	1	164	20	M	English	N			NA	N	43	38		27	24	51	0.559524	0.424242	0.589744	Dm_scrm_9.12.16_03_8.10_scrm	Hair_11.14.16_01_13.55_dm17_scrm_clipped	Dm_scrm_9.12.16_03_8.10_scrm.wav	0.319	2529	2576	0.196	0.61442	2528.9	4990.5	2461.6	3544.5	879.86	78.1	2.03e-05	1.9185	28.48	-1.59	2.33	3186.9	5081.8	8268.8
966	RDm17_02	89	N	1	2	11	2	1	2	510	18	F	Spanish	N			NA	Y	50	37		NA	NA	NA	0.619048	0.818182	0.589744	Dm_scrm_9.12.16_03_8.10_scrm	Hair_11.14.16_01_13.55_dm17_scrm_clipped	Dm_scrm_9.12.16_03_8.10_scrm.wav	0.319	2529	2576	0.196	0.61442	2528.9	4990.5	2461.6	3544.5	879.86	78.1	2.03e-05	1.9185	28.48	-1.59	2.33	3186.9	5081.8	8268.8
967	RDm17_02	59	N	1	2	20	2	1	2	340	18	M	Gujarati	N			NA	N	37	38		NA	NA	NA	0.52381	0.393939	0.666667	Dm_scrm_9.12.16_03_8.10_scrm	Hair_11.14.16_01_13.55_dm17_scrm_clipped	Dm_scrm_9.12.16_03_8.10_scrm.wav	0.319	2529	2576	0.196	0.61442	2528.9	4990.5	2461.6	3544.5	879.86	78.1	2.03e-05	1.9185	28.48	-1.59	2.33	3186.9	5081.8	8268.8
968	RDm17_02	54	N	1	3	17	2	1	2	418	18	F	Chinese	N			NA	N	35	41		NA	NA	NA	0.535714	0.424242	0.538462	Dm_scrm_9.12.16_03_8.10_scrm	Hair_11.14.16_01_13.55_dm17_scrm_clipped	Dm_scrm_9.12.16_03_8.10_scrm.wav	0.319	2529	2576	0.196	0.61442	2528.9	4990.5	2461.6	3544.5	879.86	78.1	2.03e-05	1.9185	28.48	-1.59	2.33	3186.9	5081.8	8268.8
969	RDm17_02	51	N	1	3	39	2	1	2	415	18	F	English	N			NA	Y	31	36		45	44	89	0.654762	0.515152	0.615385	Dm_scrm_9.12.16_03_8.10_scrm	Hair_11.14.16_01_13.55_dm17_scrm_clipped	Dm_scrm_9.12.16_03_8.10_scrm.wav	0.319	2529	2576	0.196	0.61442	2528.9	4990.5	2461.6	3544.5	879.86	78.1	2.03e-05	1.9185	28.48	-1.59	2.33	3186.9	5081.8	8268.8
970	RDm17_02	91	N	1	4	22	2	0	1	397	20	F	Chinese	N			NA	N	49	36		NA	NA	NA	0.547619	0.606061	0.641026	Dm_scrm_9.12.16_03_8.10_scrm	Hair_11.14.16_01_13.55_dm17_scrm_clipped	Dm_scrm_9.12.16_03_8.10_scrm.wav	0.319	2529	2576	0.196	0.61442	2528.9	4990.5	2461.6	3544.5	879.86	78.1	2.03e-05	1.9185	28.48	-1.59	2.33	3186.9	5081.8	8268.8
971	RDm17_02	70	N	1	1	6	2	1	2	496	18	F	English	N			NA	Y	62	34		48	45	93	0.52381	0.242424	0.384615	Dm_scrm_9.12.16_03_8.10_scrm	Hair_11.14.16_01_13.55_dm17_scrm_clipped	Dm_scrm_9.12.16_03_8.10_scrm.wav	0.319	2529	2576	0.196	0.61442	2528.9	4990.5	2461.6	3544.5	879.86	78.1	2.03e-05	1.9185	28.48	-1.59	2.33	3186.9	5081.8	8268.8
972	RDm17_02	44	N	1	4	12	2	0	1	671	31	F	English	N			NA	Y	39	34		47	45	92	0.571429	0.606061	0.333333	Dm_scrm_9.12.16_03_8.10_scrm	Hair_11.14.16_01_13.55_dm17_scrm_clipped	Dm_scrm_9.12.16_03_8.10_scrm.wav	0.319	2529	2576	0.196	0.61442	2528.9	4990.5	2461.6	3544.5	879.86	78.1	2.03e-05	1.9185	28.48	-1.59	2.33	3186.9	5081.8	8268.8
973	RDm17_02	510	Y	1	4	2	2	1	2	250	30	M	English	Y	Rhesus macaque, Sooty mangabey	60	60	Y	NA	NA	asked for more clarification on "intense emotion" ~3 min into task	NA	NA	NA	0.511905	0.727273	0.717949	Dm_scrm_9.12.16_03_8.10_scrm	Hair_11.14.16_01_13.55_dm17_scrm_clipped	Dm_scrm_9.12.16_03_8.10_scrm.wav	0.319	2529	2576	0.196	0.61442	2528.9	4990.5	2461.6	3544.5	879.86	78.1	2.03e-05	1.9185	28.48	-1.59	2.33	3186.9	5081.8	8268.8
974	RDm17_02	2	N	1	1	3	2	1	2	821	19	F	English	N			NA	Y	49	42		36	37	73	0.595238	0.0606061	0.641026	Dm_scrm_9.12.16_03_8.10_scrm	Hair_11.14.16_01_13.55_dm17_scrm_clipped	Dm_scrm_9.12.16_03_8.10_scrm.wav	0.319	2529	2576	0.196	0.61442	2528.9	4990.5	2461.6	3544.5	879.86	78.1	2.03e-05	1.9185	28.48	-1.59	2.33	3186.9	5081.8	8268.8
975	RDm17_02	16	N	1	2	1	2	1	2	582	21	F	English	Y	dogs, cats	6	NA	Y	44	43		38	40	78	0.559524	0.545455	0.461538	Dm_scrm_9.12.16_03_8.10_scrm	Hair_11.14.16_01_13.55_dm17_scrm_clipped	Dm_scrm_9.12.16_03_8.10_scrm.wav	0.319	2529	2576	0.196	0.61442	2528.9	4990.5	2461.6	3544.5	879.86	78.1	2.03e-05	1.9185	28.48	-1.59	2.33	3186.9	5081.8	8268.8
976	RDm17_02	507	Y	1	2	14	2	1	2	697	27	F	English	Y	Rhesus macaque, tufted capuchins	60	48	Y	NA	NA		NA	NA	NA	0.547619	1	0.666667	Dm_scrm_9.12.16_03_8.10_scrm	Hair_11.14.16_01_13.55_dm17_scrm_clipped	Dm_scrm_9.12.16_03_8.10_scrm.wav	0.319	2529	2576	0.196	0.61442	2528.9	4990.5	2461.6	3544.5	879.86	78.1	2.03e-05	1.9185	28.48	-1.59	2.33	3186.9	5081.8	8268.8
977	RDm17_02	82	N	1	1	28	2	1	2	906	18	F	Korean	Y	dogs, cats	3	NA	Y	31	40		NA	NA	NA	0.559524	0.333333	0.641026	Dm_scrm_9.12.16_03_8.10_scrm	Hair_11.14.16_01_13.55_dm17_scrm_clipped	Dm_scrm_9.12.16_03_8.10_scrm.wav	0.319	2529	2576	0.196	0.61442	2528.9	4990.5	2461.6	3544.5	879.86	78.1	2.03e-05	1.9185	28.48	-1.59	2.33	3186.9	5081.8	8268.8
978	RDm17_02	57	N	1	2	14	2	1	2	355	20	F	English	N			NA	N	29	31		27	41	68	0.547619	0.333333	0.538462	Dm_scrm_9.12.16_03_8.10_scrm	Hair_11.14.16_01_13.55_dm17_scrm_clipped	Dm_scrm_9.12.16_03_8.10_scrm.wav	0.319	2529	2576	0.196	0.61442	2528.9	4990.5	2461.6	3544.5	879.86	78.1	2.03e-05	1.9185	28.48	-1.59	2.33	3186.9	5081.8	8268.8
979	RDm17_02	11	N	1	2	37	2	1	2	372	20	F	English (mainly) + Hindi	Y	dogs	6	NA	Y	66	45	noted w/ regard to coos that it is upsetting - sounds like they're in pain. Noted surpirse that screams would be more intense context than coos	34	41	75	0.666667	0.545455	0.641026	Dm_scrm_9.12.16_03_8.10_scrm	Hair_11.14.16_01_13.55_dm17_scrm_clipped	Dm_scrm_9.12.16_03_8.10_scrm.wav	0.319	2529	2576	0.196	0.61442	2528.9	4990.5	2461.6	3544.5	879.86	78.1	2.03e-05	1.9185	28.48	-1.59	2.33	3186.9	5081.8	8268.8
980	RDm17_02	90	N	1	4	24	2	1	2	638	21	M	English	N			NA	N	43	24		42	42	84	0.52381	0.69697	0.641026	Dm_scrm_9.12.16_03_8.10_scrm	Hair_11.14.16_01_13.55_dm17_scrm_clipped	Dm_scrm_9.12.16_03_8.10_scrm.wav	0.319	2529	2576	0.196	0.61442	2528.9	4990.5	2461.6	3544.5	879.86	78.1	2.03e-05	1.9185	28.48	-1.59	2.33	3186.9	5081.8	8268.8
981	RDm17_02	41	N	1	2	23	2	0	1	506	20	M	Vietnamese	N			NA	Y	45	29		NA	NA	NA	0.630952	0.454545	0.435897	Dm_scrm_9.12.16_03_8.10_scrm	Hair_11.14.16_01_13.55_dm17_scrm_clipped	Dm_scrm_9.12.16_03_8.10_scrm.wav	0.319	2529	2576	0.196	0.61442	2528.9	4990.5	2461.6	3544.5	879.86	78.1	2.03e-05	1.9185	28.48	-1.59	2.33	3186.9	5081.8	8268.8
982	RDm17_02	36	N	1	2	17	2	0	1	443	19	F	English	Y	dogs, cats	4	NA	Y	53	31		42	42	84	0.416667	0.606061	0.435897	Dm_scrm_9.12.16_03_8.10_scrm	Hair_11.14.16_01_13.55_dm17_scrm_clipped	Dm_scrm_9.12.16_03_8.10_scrm.wav	0.319	2529	2576	0.196	0.61442	2528.9	4990.5	2461.6	3544.5	879.86	78.1	2.03e-05	1.9185	28.48	-1.59	2.33	3186.9	5081.8	8268.8
983	RDm17_02	46	N	1	1	36	2	0	1	521	18	F	English	N			NA	Y	45	25		39	42	81	0.619048	0.515152	0.589744	Dm_scrm_9.12.16_03_8.10_scrm	Hair_11.14.16_01_13.55_dm17_scrm_clipped	Dm_scrm_9.12.16_03_8.10_scrm.wav	0.319	2529	2576	0.196	0.61442	2528.9	4990.5	2461.6	3544.5	879.86	78.1	2.03e-05	1.9185	28.48	-1.59	2.33	3186.9	5081.8	8268.8
984	RDm17_02	501	Y	1	1	39	2	0	1	333	26	M	English	Y	lemurs (black white ruffed, ringtail, red bellied, crown, mongoose), Rhesus monkeys, gorillas, orangutans	Lemur: 24, Rh: 48, Gorilla: 12, Orangutan: 12	48	Y	47	37		46	44	90	0.559524	0.69697	0.461538	Dm_scrm_9.12.16_03_8.10_scrm	Hair_11.14.16_01_13.55_dm17_scrm_clipped	Dm_scrm_9.12.16_03_8.10_scrm.wav	0.319	2529	2576	0.196	0.61442	2528.9	4990.5	2461.6	3544.5	879.86	78.1	2.03e-05	1.9185	28.48	-1.59	2.33	3186.9	5081.8	8268.8
985	RDm17_02	58	N	1	2	3	2	0	1	1109	21	F	Spanish	Y	mice, rats	2	NA	Y	53	33		NA	NA	NA	0.547619	0.515152	0.461538	Dm_scrm_9.12.16_03_8.10_scrm	Hair_11.14.16_01_13.55_dm17_scrm_clipped	Dm_scrm_9.12.16_03_8.10_scrm.wav	0.319	2529	2576	0.196	0.61442	2528.9	4990.5	2461.6	3544.5	879.86	78.1	2.03e-05	1.9185	28.48	-1.59	2.33	3186.9	5081.8	8268.8
986	RDm17_02	114	N	1	3	22	2	0	1	780	19	M	English	N			NA	Y	58	35		36	38	74	0.607143	0.393939	0.512821	Dm_scrm_9.12.16_03_8.10_scrm	Hair_11.14.16_01_13.55_dm17_scrm_clipped	Dm_scrm_9.12.16_03_8.10_scrm.wav	0.319	2529	2576	0.196	0.61442	2528.9	4990.5	2461.6	3544.5	879.86	78.1	2.03e-05	1.9185	28.48	-1.59	2.33	3186.9	5081.8	8268.8
987	RDm17_02	81	N	1	2	14	2	1	2	1161	18	F	English	N			NA	Y	53	33		43	51	94	0.690476	0.454545	0.538462	Dm_scrm_9.12.16_03_8.10_scrm	Hair_11.14.16_01_13.55_dm17_scrm_clipped	Dm_scrm_9.12.16_03_8.10_scrm.wav	0.319	2529	2576	0.196	0.61442	2528.9	4990.5	2461.6	3544.5	879.86	78.1	2.03e-05	1.9185	28.48	-1.59	2.33	3186.9	5081.8	8268.8
988	RDm17_02	40	N	1	1	25	2	1	2	430	19	F	Chinese	N			NA	N	39	39		NA	NA	NA	0.666667	0.515152	0.512821	Dm_scrm_9.12.16_03_8.10_scrm	Hair_11.14.16_01_13.55_dm17_scrm_clipped	Dm_scrm_9.12.16_03_8.10_scrm.wav	0.319	2529	2576	0.196	0.61442	2528.9	4990.5	2461.6	3544.5	879.86	78.1	2.03e-05	1.9185	28.48	-1.59	2.33	3186.9	5081.8	8268.8
989	RDm17_02	78	N	1	1	10	2	0	1	669	20	M	Spanish	Y	dogs, snakes	2	NA	Y	45	35		NA	NA	NA	0.547619	0.424242	0.487179	Dm_scrm_9.12.16_03_8.10_scrm	Hair_11.14.16_01_13.55_dm17_scrm_clipped	Dm_scrm_9.12.16_03_8.10_scrm.wav	0.319	2529	2576	0.196	0.61442	2528.9	4990.5	2461.6	3544.5	879.86	78.1	2.03e-05	1.9185	28.48	-1.59	2.33	3186.9	5081.8	8268.8
990	RDm17_02	79	N	1	2	7	2	1	2	612	21	M	English	N			NA	Y	55	38		33	34	67	0.571429	0.393939	0.564103	Dm_scrm_9.12.16_03_8.10_scrm	Hair_11.14.16_01_13.55_dm17_scrm_clipped	Dm_scrm_9.12.16_03_8.10_scrm.wav	0.319	2529	2576	0.196	0.61442	2528.9	4990.5	2461.6	3544.5	879.86	78.1	2.03e-05	1.9185	28.48	-1.59	2.33	3186.9	5081.8	8268.8
991	RDm17_02	83	N	1	4	28	2	1	2	688	19	F	English	N			NA	Y	55	46		48	46	94	0.5	0.333333	0.487179	Dm_scrm_9.12.16_03_8.10_scrm	Hair_11.14.16_01_13.55_dm17_scrm_clipped	Dm_scrm_9.12.16_03_8.10_scrm.wav	0.319	2529	2576	0.196	0.61442	2528.9	4990.5	2461.6	3544.5	879.86	78.1	2.03e-05	1.9185	28.48	-1.59	2.33	3186.9	5081.8	8268.8
992	RDm17_02	9	N	1	2	36	2	1	2	536	19	M	English	Y	dogs, cats	3	NA	Y	41	31		35	32	67	0.416667	0.121212	0.435897	Dm_scrm_9.12.16_03_8.10_scrm	Hair_11.14.16_01_13.55_dm17_scrm_clipped	Dm_scrm_9.12.16_03_8.10_scrm.wav	0.319	2529	2576	0.196	0.61442	2528.9	4990.5	2461.6	3544.5	879.86	78.1	2.03e-05	1.9185	28.48	-1.59	2.33	3186.9	5081.8	8268.8
993	RDm17_02	25	N	1	4	39	2	0	1	207	21	M	English	N			NA	N	56	32		34	41	75	0.5	0.575758	0.461538	Dm_scrm_9.12.16_03_8.10_scrm	Hair_11.14.16_01_13.55_dm17_scrm_clipped	Dm_scrm_9.12.16_03_8.10_scrm.wav	0.319	2529	2576	0.196	0.61442	2528.9	4990.5	2461.6	3544.5	879.86	78.1	2.03e-05	1.9185	28.48	-1.59	2.33	3186.9	5081.8	8268.8
994	RDm17_02	87	N	1	1	18	2	1	2	1100	19	F	Korean	N			NA	Y	53	41		NA	NA	NA	0.654762	0.787879	0.615385	Dm_scrm_9.12.16_03_8.10_scrm	Hair_11.14.16_01_13.55_dm17_scrm_clipped	Dm_scrm_9.12.16_03_8.10_scrm.wav	0.319	2529	2576	0.196	0.61442	2528.9	4990.5	2461.6	3544.5	879.86	78.1	2.03e-05	1.9185	28.48	-1.59	2.33	3186.9	5081.8	8268.8
995	RDm17_02	88	N	1	2	34	2	1	2	352	19	M	Mandarin	N			NA	Y	49	27		NA	NA	NA	0.547619	0.818182	0.538462	Dm_scrm_9.12.16_03_8.10_scrm	Hair_11.14.16_01_13.55_dm17_scrm_clipped	Dm_scrm_9.12.16_03_8.10_scrm.wav	0.319	2529	2576	0.196	0.61442	2528.9	4990.5	2461.6	3544.5	879.86	78.1	2.03e-05	1.9185	28.48	-1.59	2.33	3186.9	5081.8	8268.8
996	RDm17_02	12	N	1	1	3	2	0	1	626	21	M	Chinese	N			NA	Y	41	34		NA	NA	NA	0.642857	0.484848	0.410256	Dm_scrm_9.12.16_03_8.10_scrm	Hair_11.14.16_01_13.55_dm17_scrm_clipped	Dm_scrm_9.12.16_03_8.10_scrm.wav	0.319	2529	2576	0.196	0.61442	2528.9	4990.5	2461.6	3544.5	879.86	78.1	2.03e-05	1.9185	28.48	-1.59	2.33	3186.9	5081.8	8268.8
997	RDm17_02	26	N	1	4	16	2	1	2	410	24	M	Telugu	N			NA	N	41	35		NA	NA	NA	0.607143	0.515152	0.538462	Dm_scrm_9.12.16_03_8.10_scrm	Hair_11.14.16_01_13.55_dm17_scrm_clipped	Dm_scrm_9.12.16_03_8.10_scrm.wav	0.319	2529	2576	0.196	0.61442	2528.9	4990.5	2461.6	3544.5	879.86	78.1	2.03e-05	1.9185	28.48	-1.59	2.33	3186.9	5081.8	8268.8
998	RDm17_02	63	N	1	3	30	2	1	2	412	19	F	English	N			NA	N	60	40		44	42	86	0.535714	0	0.717949	Dm_scrm_9.12.16_03_8.10_scrm	Hair_11.14.16_01_13.55_dm17_scrm_clipped	Dm_scrm_9.12.16_03_8.10_scrm.wav	0.319	2529	2576	0.196	0.61442	2528.9	4990.5	2461.6	3544.5	879.86	78.1	2.03e-05	1.9185	28.48	-1.59	2.33	3186.9	5081.8	8268.8
999	RDm17_02	111	N	1	2	16	2	0	1	151	21	F	English	N			NA	N	39	39		40	36	76	0.511905	0.575758	0.512821	Dm_scrm_9.12.16_03_8.10_scrm	Hair_11.14.16_01_13.55_dm17_scrm_clipped	Dm_scrm_9.12.16_03_8.10_scrm.wav	0.319	2529	2576	0.196	0.61442	2528.9	4990.5	2461.6	3544.5	879.86	78.1	2.03e-05	1.9185	28.48	-1.59	2.33	3186.9	5081.8	8268.8
1000	RDm17_02	13	N	1	3	4	2	0	1	451	19	F	English	N			NA	N	21	34		42	41	83	0.5	0.666667	0.487179	Dm_scrm_9.12.16_03_8.10_scrm	Hair_11.14.16_01_13.55_dm17_scrm_clipped	Dm_scrm_9.12.16_03_8.10_scrm.wav	0.319	2529	2576	0.196	0.61442	2528.9	4990.5	2461.6	3544.5	879.86	78.1	2.03e-05	1.9185	28.48	-1.59	2.33	3186.9	5081.8	8268.8
1001	RDm17_03	113	N	1	1	14	1	0	2	1198	18	F	English	N			NA	Y	52	38		47	41	88	0.583333	0.848485	0.564103	Dm_scrm_9.12.16_03_8.10_scrm	9.8.17_01_5.11_dm17_scrm	9.8.17_01_5.11_dm17_scrm.wav	1.089	5786	7061	0.759	0.69697	5759.8	8770.2	3010.4	7381.5	762.93	72.5	2.75e-06	2.00289	28.09	0.03	2.18	5598.6	6589.2	7493.6
1002	RDm17_03	94	N	1	3	29	1	0	2	323	20	F	English	N			NA	Y	45	44		40	44	84	0.72619	0.878788	0.410256	Dm_scrm_9.12.16_03_8.10_scrm	9.8.17_01_5.11_dm17_scrm	9.8.17_01_5.11_dm17_scrm.wav	1.089	5786	7061	0.759	0.69697	5759.8	8770.2	3010.4	7381.5	762.93	72.5	2.75e-06	2.00289	28.09	0.03	2.18	5598.6	6589.2	7493.6
1003	RDm17_03	107	N	1	2	3	1	0	2	304	22	F	Chinese	N			NA	N	21	37		NA	NA	NA	0.595238	0.424242	0.435897	Dm_scrm_9.12.16_03_8.10_scrm	9.8.17_01_5.11_dm17_scrm	9.8.17_01_5.11_dm17_scrm.wav	1.089	5786	7061	0.759	0.69697	5759.8	8770.2	3010.4	7381.5	762.93	72.5	2.75e-06	2.00289	28.09	0.03	2.18	5598.6	6589.2	7493.6
1004	RDm17_03	9	N	1	2	19	1	0	2	1159	19	M	English	Y	dogs, cats	3	NA	Y	41	31		35	32	67	0.416667	0.121212	0.435897	Dm_scrm_9.12.16_03_8.10_scrm	9.8.17_01_5.11_dm17_scrm	9.8.17_01_5.11_dm17_scrm.wav	1.089	5786	7061	0.759	0.69697	5759.8	8770.2	3010.4	7381.5	762.93	72.5	2.75e-06	2.00289	28.09	0.03	2.18	5598.6	6589.2	7493.6
1005	RDm17_03	34	N	1	1	19	1	0	2	36	24	M	Mandarin	N			NA	N	15	37		NA	NA	NA	0.511905	0.757576	0.282051	Dm_scrm_9.12.16_03_8.10_scrm	9.8.17_01_5.11_dm17_scrm	9.8.17_01_5.11_dm17_scrm.wav	1.089	5786	7061	0.759	0.69697	5759.8	8770.2	3010.4	7381.5	762.93	72.5	2.75e-06	2.00289	28.09	0.03	2.18	5598.6	6589.2	7493.6
1006	RDm17_03	17	N	1	4	23	1	0	2	720	19	F	Chinese	N			NA	Y	49	34		NA	NA	NA	0.595238	1	0.487179	Dm_scrm_9.12.16_03_8.10_scrm	9.8.17_01_5.11_dm17_scrm	9.8.17_01_5.11_dm17_scrm.wav	1.089	5786	7061	0.759	0.69697	5759.8	8770.2	3010.4	7381.5	762.93	72.5	2.75e-06	2.00289	28.09	0.03	2.18	5598.6	6589.2	7493.6
1007	RDm17_03	25	N	1	4	7	1	0	2	733	21	M	English	N			NA	N	56	32		34	41	75	0.5	0.575758	0.461538	Dm_scrm_9.12.16_03_8.10_scrm	9.8.17_01_5.11_dm17_scrm	9.8.17_01_5.11_dm17_scrm.wav	1.089	5786	7061	0.759	0.69697	5759.8	8770.2	3010.4	7381.5	762.93	72.5	2.75e-06	2.00289	28.09	0.03	2.18	5598.6	6589.2	7493.6
1008	RDm17_03	27	N	1	1	9	1	0	2	1247	23	F	Telugu	N			NA	N	32	44		NA	NA	NA	0.547619	0.151515	0.512821	Dm_scrm_9.12.16_03_8.10_scrm	9.8.17_01_5.11_dm17_scrm	9.8.17_01_5.11_dm17_scrm.wav	1.089	5786	7061	0.759	0.69697	5759.8	8770.2	3010.4	7381.5	762.93	72.5	2.75e-06	2.00289	28.09	0.03	2.18	5598.6	6589.2	7493.6
1009	RDm17_03	513	Y	1	3	32	1	0	2	2913	53	F	English	Y	chimps, bonobos, Rhesus macaque, Sooty mangabeys, pigtail macaque, gibbons, orangutan, stumptail macaques, baboons	288	288	Y	NA	NA		NA	NA	NA	0.535714	0.969697	0.589744	Dm_scrm_9.12.16_03_8.10_scrm	9.8.17_01_5.11_dm17_scrm	9.8.17_01_5.11_dm17_scrm.wav	1.089	5786	7061	0.759	0.69697	5759.8	8770.2	3010.4	7381.5	762.93	72.5	2.75e-06	2.00289	28.09	0.03	2.18	5598.6	6589.2	7493.6
1010	RDm17_03	84	N	1	1	7	1	1	1	713	19	F	English	N			NA	Y	34	36		35	37	72	0.547619	0.575758	0.512821	Dm_scrm_9.12.16_03_8.10_scrm	9.8.17_01_5.11_dm17_scrm	9.8.17_01_5.11_dm17_scrm.wav	1.089	5786	7061	0.759	0.69697	5759.8	8770.2	3010.4	7381.5	762.93	72.5	2.75e-06	2.00289	28.09	0.03	2.18	5598.6	6589.2	7493.6
1011	RDm17_03	60	N	1	1	15	1	0	2	505	18	F	Chinese	N			NA	Y	54	33		NA	NA	NA	0.595238	0.69697	0.615385	Dm_scrm_9.12.16_03_8.10_scrm	9.8.17_01_5.11_dm17_scrm	9.8.17_01_5.11_dm17_scrm.wav	1.089	5786	7061	0.759	0.69697	5759.8	8770.2	3010.4	7381.5	762.93	72.5	2.75e-06	2.00289	28.09	0.03	2.18	5598.6	6589.2	7493.6
1012	RDm17_03	115	N	1	1	4	1	0	2	325	18	M	Mandarin	N			NA	N	31	37		NA	NA	NA	0.583333	0.575758	0.461538	Dm_scrm_9.12.16_03_8.10_scrm	9.8.17_01_5.11_dm17_scrm	9.8.17_01_5.11_dm17_scrm.wav	1.089	5786	7061	0.759	0.69697	5759.8	8770.2	3010.4	7381.5	762.93	72.5	2.75e-06	2.00289	28.09	0.03	2.18	5598.6	6589.2	7493.6
1013	RDm17_03	502	Y	1	4	35	1	1	1	1095	39	F	English	Y	Rhesus, pigrails, gorillas, orangutans, lemurs	216	204	Y	63	30		45	43	88	0.642857	0.909091	0.666667	Dm_scrm_9.12.16_03_8.10_scrm	9.8.17_01_5.11_dm17_scrm	9.8.17_01_5.11_dm17_scrm.wav	1.089	5786	7061	0.759	0.69697	5759.8	8770.2	3010.4	7381.5	762.93	72.5	2.75e-06	2.00289	28.09	0.03	2.18	5598.6	6589.2	7493.6
1014	RDm17_03	512	Y	1	1	21	1	1	1	454	39	M	English	Y	Rhesus macaque, pigtail macaque, common chimpanzee, west lowland gorilla, Sooty mangabey	144	144	Y	NA	NA	occasionally needed to answer radio during task	NA	NA	NA	0.642857	1	0.589744	Dm_scrm_9.12.16_03_8.10_scrm	9.8.17_01_5.11_dm17_scrm	9.8.17_01_5.11_dm17_scrm.wav	1.089	5786	7061	0.759	0.69697	5759.8	8770.2	3010.4	7381.5	762.93	72.5	2.75e-06	2.00289	28.09	0.03	2.18	5598.6	6589.2	7493.6
1015	RDm17_03	14	N	1	4	31	1	1	1	4295	19	M	English and Mandarin	N			NA	N	43	35		32	39	71	0.642857	0.818182	0.615385	Dm_scrm_9.12.16_03_8.10_scrm	9.8.17_01_5.11_dm17_scrm	9.8.17_01_5.11_dm17_scrm.wav	1.089	5786	7061	0.759	0.69697	5759.8	8770.2	3010.4	7381.5	762.93	72.5	2.75e-06	2.00289	28.09	0.03	2.18	5598.6	6589.2	7493.6
1016	RDm17_03	74	N	1	3	13	1	0	2	352	19	F	English	Y	cats, dogs	1	NA	Y	47	41		41	43	84	0.428571	0.272727	0.538462	Dm_scrm_9.12.16_03_8.10_scrm	9.8.17_01_5.11_dm17_scrm	9.8.17_01_5.11_dm17_scrm.wav	1.089	5786	7061	0.759	0.69697	5759.8	8770.2	3010.4	7381.5	762.93	72.5	2.75e-06	2.00289	28.09	0.03	2.18	5598.6	6589.2	7493.6
1017	RDm17_03	29	N	1	3	10	1	1	1	1217	19	F	English	Y	dogs, cats	3	NA	Y	63	44		47	41	88	0.547619	0.454545	0.512821	Dm_scrm_9.12.16_03_8.10_scrm	9.8.17_01_5.11_dm17_scrm	9.8.17_01_5.11_dm17_scrm.wav	1.089	5786	7061	0.759	0.69697	5759.8	8770.2	3010.4	7381.5	762.93	72.5	2.75e-06	2.00289	28.09	0.03	2.18	5598.6	6589.2	7493.6
1018	RDm17_03	91	N	1	4	18	1	0	2	660	20	F	Chinese	N			NA	N	49	36		NA	NA	NA	0.547619	0.606061	0.641026	Dm_scrm_9.12.16_03_8.10_scrm	9.8.17_01_5.11_dm17_scrm	9.8.17_01_5.11_dm17_scrm.wav	1.089	5786	7061	0.759	0.69697	5759.8	8770.2	3010.4	7381.5	762.93	72.5	2.75e-06	2.00289	28.09	0.03	2.18	5598.6	6589.2	7493.6
1019	RDm17_03	40	N	1	1	12	1	0	2	392	19	F	Chinese	N			NA	N	39	39		NA	NA	NA	0.666667	0.515152	0.512821	Dm_scrm_9.12.16_03_8.10_scrm	9.8.17_01_5.11_dm17_scrm	9.8.17_01_5.11_dm17_scrm.wav	1.089	5786	7061	0.759	0.69697	5759.8	8770.2	3010.4	7381.5	762.93	72.5	2.75e-06	2.00289	28.09	0.03	2.18	5598.6	6589.2	7493.6
1020	RDm17_03	108	N	1	4	6	1	0	2	610	19	M	English	N			NA	N	59	24		45	43	88	0.571429	0.393939	0.435897	Dm_scrm_9.12.16_03_8.10_scrm	9.8.17_01_5.11_dm17_scrm	9.8.17_01_5.11_dm17_scrm.wav	1.089	5786	7061	0.759	0.69697	5759.8	8770.2	3010.4	7381.5	762.93	72.5	2.75e-06	2.00289	28.09	0.03	2.18	5598.6	6589.2	7493.6
1021	RDm17_03	102	N	1	3	27	1	0	2	261	18	F	English	Y	elephants, dogs, tortoises	3	NA	Y	46	44		33	36	69	0.559524	0.424242	0.461538	Dm_scrm_9.12.16_03_8.10_scrm	9.8.17_01_5.11_dm17_scrm	9.8.17_01_5.11_dm17_scrm.wav	1.089	5786	7061	0.759	0.69697	5759.8	8770.2	3010.4	7381.5	762.93	72.5	2.75e-06	2.00289	28.09	0.03	2.18	5598.6	6589.2	7493.6
1022	RDm17_03	64	N	1	2	3	1	0	2	1769	18	F	English	N			NA	N	55	36		40	42	82	0.654762	0.393939	0.666667	Dm_scrm_9.12.16_03_8.10_scrm	9.8.17_01_5.11_dm17_scrm	9.8.17_01_5.11_dm17_scrm.wav	1.089	5786	7061	0.759	0.69697	5759.8	8770.2	3010.4	7381.5	762.93	72.5	2.75e-06	2.00289	28.09	0.03	2.18	5598.6	6589.2	7493.6
1023	RDm17_03	18	N	1	1	34	1	0	2	804	20	F	English	N			NA	Y	44	35		32	42	74	0.571429	0.151515	0.333333	Dm_scrm_9.12.16_03_8.10_scrm	9.8.17_01_5.11_dm17_scrm	9.8.17_01_5.11_dm17_scrm.wav	1.089	5786	7061	0.759	0.69697	5759.8	8770.2	3010.4	7381.5	762.93	72.5	2.75e-06	2.00289	28.09	0.03	2.18	5598.6	6589.2	7493.6
1024	RDm17_03	48	N	1	3	39	1	1	1	1759	19	F	English	N			NA	Y	33	36		36	46	82	0.654762	0.606061	0.564103	Dm_scrm_9.12.16_03_8.10_scrm	9.8.17_01_5.11_dm17_scrm	9.8.17_01_5.11_dm17_scrm.wav	1.089	5786	7061	0.759	0.69697	5759.8	8770.2	3010.4	7381.5	762.93	72.5	2.75e-06	2.00289	28.09	0.03	2.18	5598.6	6589.2	7493.6
1025	RDm17_03	88	N	1	2	37	1	0	2	204	19	M	Mandarin	N			NA	Y	49	27		NA	NA	NA	0.547619	0.818182	0.538462	Dm_scrm_9.12.16_03_8.10_scrm	9.8.17_01_5.11_dm17_scrm	9.8.17_01_5.11_dm17_scrm.wav	1.089	5786	7061	0.759	0.69697	5759.8	8770.2	3010.4	7381.5	762.93	72.5	2.75e-06	2.00289	28.09	0.03	2.18	5598.6	6589.2	7493.6
1026	RDm17_03	49	N	1	3	36	1	1	1	1550	18	F	English	N			NA	N	44	28		42	2	44	0.642857	0.454545	0.487179	Dm_scrm_9.12.16_03_8.10_scrm	9.8.17_01_5.11_dm17_scrm	9.8.17_01_5.11_dm17_scrm.wav	1.089	5786	7061	0.759	0.69697	5759.8	8770.2	3010.4	7381.5	762.93	72.5	2.75e-06	2.00289	28.09	0.03	2.18	5598.6	6589.2	7493.6
1027	RDm17_03	52	N	1	3	28	1	0	2	369	19	F	English	N			NA	Y	55	38		42	43	85	0.619048	0.393939	0.512821	Dm_scrm_9.12.16_03_8.10_scrm	9.8.17_01_5.11_dm17_scrm	9.8.17_01_5.11_dm17_scrm.wav	1.089	5786	7061	0.759	0.69697	5759.8	8770.2	3010.4	7381.5	762.93	72.5	2.75e-06	2.00289	28.09	0.03	2.18	5598.6	6589.2	7493.6
1028	RDm17_03	63	N	1	3	12	1	1	1	1320	19	F	English	N			NA	N	60	40		44	42	86	0.535714	0	0.717949	Dm_scrm_9.12.16_03_8.10_scrm	9.8.17_01_5.11_dm17_scrm	9.8.17_01_5.11_dm17_scrm.wav	1.089	5786	7061	0.759	0.69697	5759.8	8770.2	3010.4	7381.5	762.93	72.5	2.75e-06	2.00289	28.09	0.03	2.18	5598.6	6589.2	7493.6
1029	RDm17_03	54	N	1	3	13	1	1	1	552	18	F	Chinese	N			NA	N	35	41		NA	NA	NA	0.535714	0.424242	0.538462	Dm_scrm_9.12.16_03_8.10_scrm	9.8.17_01_5.11_dm17_scrm	9.8.17_01_5.11_dm17_scrm.wav	1.089	5786	7061	0.759	0.69697	5759.8	8770.2	3010.4	7381.5	762.93	72.5	2.75e-06	2.00289	28.09	0.03	2.18	5598.6	6589.2	7493.6
1030	RDm17_03	508	Y	1	1	21	1	1	1	960	40	F	English	Y	Rhesus macaque, pigtail macaque, sooty mangabey	192	120	Y	NA	NA		NA	NA	NA	0.511905	0.969697	0.641026	Dm_scrm_9.12.16_03_8.10_scrm	9.8.17_01_5.11_dm17_scrm	9.8.17_01_5.11_dm17_scrm.wav	1.089	5786	7061	0.759	0.69697	5759.8	8770.2	3010.4	7381.5	762.93	72.5	2.75e-06	2.00289	28.09	0.03	2.18	5598.6	6589.2	7493.6
1031	RDm17_03	101	N	1	1	38	1	0	2	453	19	F	English	Y	mice	11	NA	Y	50	40		43	43	86	0.690476	0.484848	0.487179	Dm_scrm_9.12.16_03_8.10_scrm	9.8.17_01_5.11_dm17_scrm	9.8.17_01_5.11_dm17_scrm.wav	1.089	5786	7061	0.759	0.69697	5759.8	8770.2	3010.4	7381.5	762.93	72.5	2.75e-06	2.00289	28.09	0.03	2.18	5598.6	6589.2	7493.6
1032	RDm17_03	79	N	1	2	39	1	1	1	189	21	M	English	N			NA	Y	55	38		33	34	67	0.571429	0.393939	0.564103	Dm_scrm_9.12.16_03_8.10_scrm	9.8.17_01_5.11_dm17_scrm	9.8.17_01_5.11_dm17_scrm.wav	1.089	5786	7061	0.759	0.69697	5759.8	8770.2	3010.4	7381.5	762.93	72.5	2.75e-06	2.00289	28.09	0.03	2.18	5598.6	6589.2	7493.6
1033	RDm17_03	36	N	1	2	9	1	0	2	433	19	F	English	Y	dogs, cats	4	NA	Y	53	31		42	42	84	0.416667	0.606061	0.435897	Dm_scrm_9.12.16_03_8.10_scrm	9.8.17_01_5.11_dm17_scrm	9.8.17_01_5.11_dm17_scrm.wav	1.089	5786	7061	0.759	0.69697	5759.8	8770.2	3010.4	7381.5	762.93	72.5	2.75e-06	2.00289	28.09	0.03	2.18	5598.6	6589.2	7493.6
1034	RDm17_03	73	N	1	2	35	1	0	2	418	19	F	English and Chinese	N			NA	Y	41	37		34	36	70	0.571429	0.575758	0.538462	Dm_scrm_9.12.16_03_8.10_scrm	9.8.17_01_5.11_dm17_scrm	9.8.17_01_5.11_dm17_scrm.wav	1.089	5786	7061	0.759	0.69697	5759.8	8770.2	3010.4	7381.5	762.93	72.5	2.75e-06	2.00289	28.09	0.03	2.18	5598.6	6589.2	7493.6
1035	RDm17_03	62	N	1	1	26	1	0	2	228	18	F	English	Y	mice	1	NA	Y	59	32		46	40	86	0.559524	0.484848	0.538462	Dm_scrm_9.12.16_03_8.10_scrm	9.8.17_01_5.11_dm17_scrm	9.8.17_01_5.11_dm17_scrm.wav	1.089	5786	7061	0.759	0.69697	5759.8	8770.2	3010.4	7381.5	762.93	72.5	2.75e-06	2.00289	28.09	0.03	2.18	5598.6	6589.2	7493.6
1036	RDm17_03	32	N	1	3	33	1	0	2	356	23	F	English	N			NA	N	58	26		34	33	67	0.559524	0.424242	0.435897	Dm_scrm_9.12.16_03_8.10_scrm	9.8.17_01_5.11_dm17_scrm	9.8.17_01_5.11_dm17_scrm.wav	1.089	5786	7061	0.759	0.69697	5759.8	8770.2	3010.4	7381.5	762.93	72.5	2.75e-06	2.00289	28.09	0.03	2.18	5598.6	6589.2	7493.6
1037	RDm17_03	110	N	1	4	26	1	0	2	513	19	M	English	N			NA	Y	40	32		35	38	73	0.511905	0.69697	0.564103	Dm_scrm_9.12.16_03_8.10_scrm	9.8.17_01_5.11_dm17_scrm	9.8.17_01_5.11_dm17_scrm.wav	1.089	5786	7061	0.759	0.69697	5759.8	8770.2	3010.4	7381.5	762.93	72.5	2.75e-06	2.00289	28.09	0.03	2.18	5598.6	6589.2	7493.6
1038	RDm17_03	41	N	1	2	19	1	1	1	353	20	M	Vietnamese	N			NA	Y	45	29		NA	NA	NA	0.630952	0.454545	0.435897	Dm_scrm_9.12.16_03_8.10_scrm	9.8.17_01_5.11_dm17_scrm	9.8.17_01_5.11_dm17_scrm.wav	1.089	5786	7061	0.759	0.69697	5759.8	8770.2	3010.4	7381.5	762.93	72.5	2.75e-06	2.00289	28.09	0.03	2.18	5598.6	6589.2	7493.6
1039	RDm17_03	66	N	1	1	29	1	0	2	374	20	M	Chinese	N			NA	N	41	38		NA	NA	NA	0.47619	0.69697	0.512821	Dm_scrm_9.12.16_03_8.10_scrm	9.8.17_01_5.11_dm17_scrm	9.8.17_01_5.11_dm17_scrm.wav	1.089	5786	7061	0.759	0.69697	5759.8	8770.2	3010.4	7381.5	762.93	72.5	2.75e-06	2.00289	28.09	0.03	2.18	5598.6	6589.2	7493.6
1040	RDm17_03	46	N	1	1	33	1	0	2	357	18	F	English	N			NA	Y	45	25		39	42	81	0.619048	0.515152	0.589744	Dm_scrm_9.12.16_03_8.10_scrm	9.8.17_01_5.11_dm17_scrm	9.8.17_01_5.11_dm17_scrm.wav	1.089	5786	7061	0.759	0.69697	5759.8	8770.2	3010.4	7381.5	762.93	72.5	2.75e-06	2.00289	28.09	0.03	2.18	5598.6	6589.2	7493.6
1041	RDm17_03	69	N	1	1	38	1	1	1	913	20	F	English	N			NA	Y	40	37		42	43	85	0.547619	0.424242	0.615385	Dm_scrm_9.12.16_03_8.10_scrm	9.8.17_01_5.11_dm17_scrm	9.8.17_01_5.11_dm17_scrm.wav	1.089	5786	7061	0.759	0.69697	5759.8	8770.2	3010.4	7381.5	762.93	72.5	2.75e-06	2.00289	28.09	0.03	2.18	5598.6	6589.2	7493.6
1042	RDm17_03	95	N	1	1	20	1	0	2	265	20	F	English	N			NA	Y	57	30		39	44	83	0.571429	0.363636	0.564103	Dm_scrm_9.12.16_03_8.10_scrm	9.8.17_01_5.11_dm17_scrm	9.8.17_01_5.11_dm17_scrm.wav	1.089	5786	7061	0.759	0.69697	5759.8	8770.2	3010.4	7381.5	762.93	72.5	2.75e-06	2.00289	28.09	0.03	2.18	5598.6	6589.2	7493.6
1043	RDm17_03	6	N	1	2	1	1	0	2	678	23	M	English	Y	mice	3	NA	Y	31	28		38	41	79	0.595238	0.484848	0.589744	Dm_scrm_9.12.16_03_8.10_scrm	9.8.17_01_5.11_dm17_scrm	9.8.17_01_5.11_dm17_scrm.wav	1.089	5786	7061	0.759	0.69697	5759.8	8770.2	3010.4	7381.5	762.93	72.5	2.75e-06	2.00289	28.09	0.03	2.18	5598.6	6589.2	7493.6
1044	RDm17_03	28	N	1	3	39	1	1	1	717	40	F	English	N			NA	Y	50	33		42	NA	NA	0.630952	0.606061	0.564103	Dm_scrm_9.12.16_03_8.10_scrm	9.8.17_01_5.11_dm17_scrm	9.8.17_01_5.11_dm17_scrm.wav	1.089	5786	7061	0.759	0.69697	5759.8	8770.2	3010.4	7381.5	762.93	72.5	2.75e-06	2.00289	28.09	0.03	2.18	5598.6	6589.2	7493.6
1045	RDm17_03	83	N	1	4	16	1	1	1	515	19	F	English	N			NA	Y	55	46		48	46	94	0.5	0.333333	0.487179	Dm_scrm_9.12.16_03_8.10_scrm	9.8.17_01_5.11_dm17_scrm	9.8.17_01_5.11_dm17_scrm.wav	1.089	5786	7061	0.759	0.69697	5759.8	8770.2	3010.4	7381.5	762.93	72.5	2.75e-06	2.00289	28.09	0.03	2.18	5598.6	6589.2	7493.6
1046	RDm17_03	57	N	1	2	26	1	1	1	321	20	F	English	N			NA	N	29	31		27	41	68	0.547619	0.333333	0.538462	Dm_scrm_9.12.16_03_8.10_scrm	9.8.17_01_5.11_dm17_scrm	9.8.17_01_5.11_dm17_scrm.wav	1.089	5786	7061	0.759	0.69697	5759.8	8770.2	3010.4	7381.5	762.93	72.5	2.75e-06	2.00289	28.09	0.03	2.18	5598.6	6589.2	7493.6
1047	RDm17_03	82	N	1	1	25	1	1	1	1380	18	F	Korean	Y	dogs, cats	3	NA	Y	31	40		NA	NA	NA	0.559524	0.333333	0.641026	Dm_scrm_9.12.16_03_8.10_scrm	9.8.17_01_5.11_dm17_scrm	9.8.17_01_5.11_dm17_scrm.wav	1.089	5786	7061	0.759	0.69697	5759.8	8770.2	3010.4	7381.5	762.93	72.5	2.75e-06	2.00289	28.09	0.03	2.18	5598.6	6589.2	7493.6
1048	RDm17_03	42	N	1	1	10	1	1	1	279	19	F	English	N			NA	N	35	28		44	44	88	0.571429	0.454545	0.692308	Dm_scrm_9.12.16_03_8.10_scrm	9.8.17_01_5.11_dm17_scrm	9.8.17_01_5.11_dm17_scrm.wav	1.089	5786	7061	0.759	0.69697	5759.8	8770.2	3010.4	7381.5	762.93	72.5	2.75e-06	2.00289	28.09	0.03	2.18	5598.6	6589.2	7493.6
1049	RDm17_03	31	N	1	2	7	1	0	2	1254	18	F	English	N			NA	Y	47	35		38	40	78	0.583333	0.575758	0.384615	Dm_scrm_9.12.16_03_8.10_scrm	9.8.17_01_5.11_dm17_scrm	9.8.17_01_5.11_dm17_scrm.wav	1.089	5786	7061	0.759	0.69697	5759.8	8770.2	3010.4	7381.5	762.93	72.5	2.75e-06	2.00289	28.09	0.03	2.18	5598.6	6589.2	7493.6
1050	RDm17_03	501	Y	1	1	7	1	0	2	525	26	M	English	Y	lemurs (black white ruffed, ringtail, red bellied, crown, mongoose), Rhesus monkeys, gorillas, orangutans	Lemur: 24, Rh: 48, Gorilla: 12, Orangutan: 12	48	Y	47	37		46	44	90	0.559524	0.69697	0.461538	Dm_scrm_9.12.16_03_8.10_scrm	9.8.17_01_5.11_dm17_scrm	9.8.17_01_5.11_dm17_scrm.wav	1.089	5786	7061	0.759	0.69697	5759.8	8770.2	3010.4	7381.5	762.93	72.5	2.75e-06	2.00289	28.09	0.03	2.18	5598.6	6589.2	7493.6
1051	RDm17_03	21	N	1	2	19	1	0	2	499	20	F	English	Y	dogs	6	NA	Y	44	37		41	34	75	0.630952	0.787879	0.384615	Dm_scrm_9.12.16_03_8.10_scrm	9.8.17_01_5.11_dm17_scrm	9.8.17_01_5.11_dm17_scrm.wav	1.089	5786	7061	0.759	0.69697	5759.8	8770.2	3010.4	7381.5	762.93	72.5	2.75e-06	2.00289	28.09	0.03	2.18	5598.6	6589.2	7493.6
1052	RDm17_03	2	N	1	1	36	1	1	1	440	19	F	English	N			NA	Y	49	42		36	37	73	0.595238	0.0606061	0.641026	Dm_scrm_9.12.16_03_8.10_scrm	9.8.17_01_5.11_dm17_scrm	9.8.17_01_5.11_dm17_scrm.wav	1.089	5786	7061	0.759	0.69697	5759.8	8770.2	3010.4	7381.5	762.93	72.5	2.75e-06	2.00289	28.09	0.03	2.18	5598.6	6589.2	7493.6
1053	RDm17_03	23	N	1	2	23	1	1	1	832	20	F	Mandarin	N			NA	N	38	33		NA	NA	NA	0.52381	0.575758	0.564103	Dm_scrm_9.12.16_03_8.10_scrm	9.8.17_01_5.11_dm17_scrm	9.8.17_01_5.11_dm17_scrm.wav	1.089	5786	7061	0.759	0.69697	5759.8	8770.2	3010.4	7381.5	762.93	72.5	2.75e-06	2.00289	28.09	0.03	2.18	5598.6	6589.2	7493.6
1054	RDm17_03	92	N	1	3	7	1	0	2	614	18	F	English	N			NA	Y	45	30		36	36	72	0.595238	0.212121	0.589744	Dm_scrm_9.12.16_03_8.10_scrm	9.8.17_01_5.11_dm17_scrm	9.8.17_01_5.11_dm17_scrm.wav	1.089	5786	7061	0.759	0.69697	5759.8	8770.2	3010.4	7381.5	762.93	72.5	2.75e-06	2.00289	28.09	0.03	2.18	5598.6	6589.2	7493.6
1055	RDm17_03	507	Y	1	2	8	1	1	1	355	27	F	English	Y	Rhesus macaque, tufted capuchins	60	48	Y	NA	NA		NA	NA	NA	0.547619	1	0.666667	Dm_scrm_9.12.16_03_8.10_scrm	9.8.17_01_5.11_dm17_scrm	9.8.17_01_5.11_dm17_scrm.wav	1.089	5786	7061	0.759	0.69697	5759.8	8770.2	3010.4	7381.5	762.93	72.5	2.75e-06	2.00289	28.09	0.03	2.18	5598.6	6589.2	7493.6
1056	RDm17_03	112	N	1	3	19	1	0	2	1876	18	M	Turkish	N			NA	Y	55	40		NA	NA	NA	0.535714	0.424242	0.461538	Dm_scrm_9.12.16_03_8.10_scrm	9.8.17_01_5.11_dm17_scrm	9.8.17_01_5.11_dm17_scrm.wav	1.089	5786	7061	0.759	0.69697	5759.8	8770.2	3010.4	7381.5	762.93	72.5	2.75e-06	2.00289	28.09	0.03	2.18	5598.6	6589.2	7493.6
1057	RDm17_03	510	Y	1	4	15	1	1	1	577	30	M	English	Y	Rhesus macaque, Sooty mangabey	60	60	Y	NA	NA	asked for more clarification on "intense emotion" ~3 min into task	NA	NA	NA	0.511905	0.727273	0.717949	Dm_scrm_9.12.16_03_8.10_scrm	9.8.17_01_5.11_dm17_scrm	9.8.17_01_5.11_dm17_scrm.wav	1.089	5786	7061	0.759	0.69697	5759.8	8770.2	3010.4	7381.5	762.93	72.5	2.75e-06	2.00289	28.09	0.03	2.18	5598.6	6589.2	7493.6
1058	RDm17_03	20	Y	1	3	30	1	1	1	590	37	F	English	Y	Rhesus, chimpanzees, dogs, cats, mice, rats	180	132	Y	52	33		46	47	93	0.392857	0.454545	0.589744	Dm_scrm_9.12.16_03_8.10_scrm	9.8.17_01_5.11_dm17_scrm	9.8.17_01_5.11_dm17_scrm.wav	1.089	5786	7061	0.759	0.69697	5759.8	8770.2	3010.4	7381.5	762.93	72.5	2.75e-06	2.00289	28.09	0.03	2.18	5598.6	6589.2	7493.6
1059	RDm17_03	55	N	1	1	36	1	0	2	473	18	F	Mandarin	N			NA	Y	64	30		NA	NA	NA	0.690476	0.515152	0.410256	Dm_scrm_9.12.16_03_8.10_scrm	9.8.17_01_5.11_dm17_scrm	9.8.17_01_5.11_dm17_scrm.wav	1.089	5786	7061	0.759	0.69697	5759.8	8770.2	3010.4	7381.5	762.93	72.5	2.75e-06	2.00289	28.09	0.03	2.18	5598.6	6589.2	7493.6
1060	RDm17_03	38	N	1	3	27	1	1	1	359	18	F	English	N			NA	Y	57	36		41	41	82	0.619048	0.606061	0.615385	Dm_scrm_9.12.16_03_8.10_scrm	9.8.17_01_5.11_dm17_scrm	9.8.17_01_5.11_dm17_scrm.wav	1.089	5786	7061	0.759	0.69697	5759.8	8770.2	3010.4	7381.5	762.93	72.5	2.75e-06	2.00289	28.09	0.03	2.18	5598.6	6589.2	7493.6
1061	RDm17_03	39	N	1	4	17	1	1	1	562	19	F	Spanish/English	N			NA	Y	55	38		41	43	84	0.583333	0.454545	0.538462	Dm_scrm_9.12.16_03_8.10_scrm	9.8.17_01_5.11_dm17_scrm	9.8.17_01_5.11_dm17_scrm.wav	1.089	5786	7061	0.759	0.69697	5759.8	8770.2	3010.4	7381.5	762.93	72.5	2.75e-06	2.00289	28.09	0.03	2.18	5598.6	6589.2	7493.6
1062	RDm17_03	103	N	1	1	2	1	1	1	625	19	F	Korean + English	Y	dogs, cats	3	NA	Y	47	39		40	41	81	0.52381	0.393939	0.512821	Dm_scrm_9.12.16_03_8.10_scrm	9.8.17_01_5.11_dm17_scrm	9.8.17_01_5.11_dm17_scrm.wav	1.089	5786	7061	0.759	0.69697	5759.8	8770.2	3010.4	7381.5	762.93	72.5	2.75e-06	2.00289	28.09	0.03	2.18	5598.6	6589.2	7493.6
1063	RDm17_03	96	N	1	4	30	1	0	2	390	18	F	English	N			NA	Y	59	39		44	47	91	0.583333	0.727273	0.512821	Dm_scrm_9.12.16_03_8.10_scrm	9.8.17_01_5.11_dm17_scrm	9.8.17_01_5.11_dm17_scrm.wav	1.089	5786	7061	0.759	0.69697	5759.8	8770.2	3010.4	7381.5	762.93	72.5	2.75e-06	2.00289	28.09	0.03	2.18	5598.6	6589.2	7493.6
1064	RDm17_03	114	N	1	3	5	1	1	1	1093	19	M	English	N			NA	Y	58	35		36	38	74	0.607143	0.393939	0.512821	Dm_scrm_9.12.16_03_8.10_scrm	9.8.17_01_5.11_dm17_scrm	9.8.17_01_5.11_dm17_scrm.wav	1.089	5786	7061	0.759	0.69697	5759.8	8770.2	3010.4	7381.5	762.93	72.5	2.75e-06	2.00289	28.09	0.03	2.18	5598.6	6589.2	7493.6
1065	RDm17_03	12	N	1	1	32	1	0	2	285	21	M	Chinese	N			NA	Y	41	34		NA	NA	NA	0.642857	0.484848	0.410256	Dm_scrm_9.12.16_03_8.10_scrm	9.8.17_01_5.11_dm17_scrm	9.8.17_01_5.11_dm17_scrm.wav	1.089	5786	7061	0.759	0.69697	5759.8	8770.2	3010.4	7381.5	762.93	72.5	2.75e-06	2.00289	28.09	0.03	2.18	5598.6	6589.2	7493.6
1066	RDm17_03	68	N	1	4	22	1	1	1	385	19	M	Spanish	N			NA	N	48	NA	didn't fill out this questionnaire animal	NA	NA	NA	0.607143	0.333333	0.641026	Dm_scrm_9.12.16_03_8.10_scrm	9.8.17_01_5.11_dm17_scrm	9.8.17_01_5.11_dm17_scrm.wav	1.089	5786	7061	0.759	0.69697	5759.8	8770.2	3010.4	7381.5	762.93	72.5	2.75e-06	2.00289	28.09	0.03	2.18	5598.6	6589.2	7493.6
1067	RDm17_03	87	N	1	1	9	1	0	2	718	19	F	Korean	N			NA	Y	53	41		NA	NA	NA	0.654762	0.787879	0.615385	Dm_scrm_9.12.16_03_8.10_scrm	9.8.17_01_5.11_dm17_scrm	9.8.17_01_5.11_dm17_scrm.wav	1.089	5786	7061	0.759	0.69697	5759.8	8770.2	3010.4	7381.5	762.93	72.5	2.75e-06	2.00289	28.09	0.03	2.18	5598.6	6589.2	7493.6
1068	RDm17_03	53	N	1	4	1	1	0	2	352	18	F	English	N			NA	N	71	47		22	17	39	0.642857	0.787879	0.641026	Dm_scrm_9.12.16_03_8.10_scrm	9.8.17_01_5.11_dm17_scrm	9.8.17_01_5.11_dm17_scrm.wav	1.089	5786	7061	0.759	0.69697	5759.8	8770.2	3010.4	7381.5	762.93	72.5	2.75e-06	2.00289	28.09	0.03	2.18	5598.6	6589.2	7493.6
1069	RDm17_03	80	N	1	1	27	1	0	2	364	18	F	English	N			NA	Y	57	34		36	3	39	0.607143	0.545455	0.358974	Dm_scrm_9.12.16_03_8.10_scrm	9.8.17_01_5.11_dm17_scrm	9.8.17_01_5.11_dm17_scrm.wav	1.089	5786	7061	0.759	0.69697	5759.8	8770.2	3010.4	7381.5	762.93	72.5	2.75e-06	2.00289	28.09	0.03	2.18	5598.6	6589.2	7493.6
1070	RDm17_03	85	N	1	2	35	1	1	1	871	19	F	Chinese	N			NA	Y	25	32		NA	NA	NA	0.571429	0.363636	0.435897	Dm_scrm_9.12.16_03_8.10_scrm	9.8.17_01_5.11_dm17_scrm	9.8.17_01_5.11_dm17_scrm.wav	1.089	5786	7061	0.759	0.69697	5759.8	8770.2	3010.4	7381.5	762.93	72.5	2.75e-06	2.00289	28.09	0.03	2.18	5598.6	6589.2	7493.6
1071	RDm17_03	10	N	1	2	10	1	1	1	2074	21	F	English	N			NA	Y	50	38		36	38	74	0.559524	0.757576	0.358974	Dm_scrm_9.12.16_03_8.10_scrm	9.8.17_01_5.11_dm17_scrm	9.8.17_01_5.11_dm17_scrm.wav	1.089	5786	7061	0.759	0.69697	5759.8	8770.2	3010.4	7381.5	762.93	72.5	2.75e-06	2.00289	28.09	0.03	2.18	5598.6	6589.2	7493.6
1072	RDm17_03	105	N	1	4	4	1	0	2	265	19	F	English	N			NA	Y	44	36		40	42	82	0.571429	0.606061	0.435897	Dm_scrm_9.12.16_03_8.10_scrm	9.8.17_01_5.11_dm17_scrm	9.8.17_01_5.11_dm17_scrm.wav	1.089	5786	7061	0.759	0.69697	5759.8	8770.2	3010.4	7381.5	762.93	72.5	2.75e-06	2.00289	28.09	0.03	2.18	5598.6	6589.2	7493.6
1073	RDm17_03	16	N	1	2	10	1	0	2	432	21	F	English	Y	dogs, cats	6	NA	Y	44	43		38	40	78	0.559524	0.545455	0.461538	Dm_scrm_9.12.16_03_8.10_scrm	9.8.17_01_5.11_dm17_scrm	9.8.17_01_5.11_dm17_scrm.wav	1.089	5786	7061	0.759	0.69697	5759.8	8770.2	3010.4	7381.5	762.93	72.5	2.75e-06	2.00289	28.09	0.03	2.18	5598.6	6589.2	7493.6
1074	RDm17_03	35	N	1	4	22	1	0	2	792	19	M	English	N			NA	N	40	21		44	39	83	0.666667	0.818182	0.641026	Dm_scrm_9.12.16_03_8.10_scrm	9.8.17_01_5.11_dm17_scrm	9.8.17_01_5.11_dm17_scrm.wav	1.089	5786	7061	0.759	0.69697	5759.8	8770.2	3010.4	7381.5	762.93	72.5	2.75e-06	2.00289	28.09	0.03	2.18	5598.6	6589.2	7493.6
1075	RDm17_03	19	N	1	4	12	1	0	2	350	51	F	English	Y	mice	240	NA	Y	36	29		43	47	90	0.511905	0.575758	0.487179	Dm_scrm_9.12.16_03_8.10_scrm	9.8.17_01_5.11_dm17_scrm	9.8.17_01_5.11_dm17_scrm.wav	1.089	5786	7061	0.759	0.69697	5759.8	8770.2	3010.4	7381.5	762.93	72.5	2.75e-06	2.00289	28.09	0.03	2.18	5598.6	6589.2	7493.6
1076	RDm17_03	11	N	1	2	16	1	1	1	809	20	F	English (mainly) + Hindi	Y	dogs	6	NA	Y	66	45	noted w/ regard to coos that it is upsetting - sounds like they're in pain. Noted surpirse that screams would be more intense context than coos	34	41	75	0.666667	0.545455	0.641026	Dm_scrm_9.12.16_03_8.10_scrm	9.8.17_01_5.11_dm17_scrm	9.8.17_01_5.11_dm17_scrm.wav	1.089	5786	7061	0.759	0.69697	5759.8	8770.2	3010.4	7381.5	762.93	72.5	2.75e-06	2.00289	28.09	0.03	2.18	5598.6	6589.2	7493.6
1077	RDm17_03	58	N	1	2	19	1	0	2	502	21	F	Spanish	Y	mice, rats	2	NA	Y	53	33		NA	NA	NA	0.547619	0.515152	0.461538	Dm_scrm_9.12.16_03_8.10_scrm	9.8.17_01_5.11_dm17_scrm	9.8.17_01_5.11_dm17_scrm.wav	1.089	5786	7061	0.759	0.69697	5759.8	8770.2	3010.4	7381.5	762.93	72.5	2.75e-06	2.00289	28.09	0.03	2.18	5598.6	6589.2	7493.6
1078	RDm17_03	1	N	1	2	18	1	1	1	1149	20	F	English	Y	cats, dogs	12	NA	Y	38	33		NA	40	NA	0.642857	0.333333	0.564103	Dm_scrm_9.12.16_03_8.10_scrm	9.8.17_01_5.11_dm17_scrm	9.8.17_01_5.11_dm17_scrm.wav	1.089	5786	7061	0.759	0.69697	5759.8	8770.2	3010.4	7381.5	762.93	72.5	2.75e-06	2.00289	28.09	0.03	2.18	5598.6	6589.2	7493.6
1079	RDm17_03	111	N	1	2	17	1	1	1	453	21	F	English	N			NA	N	39	39		40	36	76	0.511905	0.575758	0.512821	Dm_scrm_9.12.16_03_8.10_scrm	9.8.17_01_5.11_dm17_scrm	9.8.17_01_5.11_dm17_scrm.wav	1.089	5786	7061	0.759	0.69697	5759.8	8770.2	3010.4	7381.5	762.93	72.5	2.75e-06	2.00289	28.09	0.03	2.18	5598.6	6589.2	7493.6
1080	RDm17_03	104	N	1	2	11	1	0	2	1382	19	F	Bangla	N			NA	N	49	31		NA	NA	NA	0.619048	0.363636	0.384615	Dm_scrm_9.12.16_03_8.10_scrm	9.8.17_01_5.11_dm17_scrm	9.8.17_01_5.11_dm17_scrm.wav	1.089	5786	7061	0.759	0.69697	5759.8	8770.2	3010.4	7381.5	762.93	72.5	2.75e-06	2.00289	28.09	0.03	2.18	5598.6	6589.2	7493.6
1081	RDm17_03	24	N	1	4	11	1	0	2	496	20	M	English	N			NA	N	41	24		35	36	71	0.404762	0.363636	0.666667	Dm_scrm_9.12.16_03_8.10_scrm	9.8.17_01_5.11_dm17_scrm	9.8.17_01_5.11_dm17_scrm.wav	1.089	5786	7061	0.759	0.69697	5759.8	8770.2	3010.4	7381.5	762.93	72.5	2.75e-06	2.00289	28.09	0.03	2.18	5598.6	6589.2	7493.6
1082	RDm17_03	70	N	1	1	22	1	0	2	9	18	F	English	N			NA	Y	62	34		48	45	93	0.52381	0.242424	0.384615	Dm_scrm_9.12.16_03_8.10_scrm	9.8.17_01_5.11_dm17_scrm	9.8.17_01_5.11_dm17_scrm.wav	1.089	5786	7061	0.759	0.69697	5759.8	8770.2	3010.4	7381.5	762.93	72.5	2.75e-06	2.00289	28.09	0.03	2.18	5598.6	6589.2	7493.6
1083	RDm17_03	106	N	1	3	25	1	0	2	460	18	F	Korean	N			NA	Y	53	39		NA	NA	NA	0.607143	0.606061	0.461538	Dm_scrm_9.12.16_03_8.10_scrm	9.8.17_01_5.11_dm17_scrm	9.8.17_01_5.11_dm17_scrm.wav	1.089	5786	7061	0.759	0.69697	5759.8	8770.2	3010.4	7381.5	762.93	72.5	2.75e-06	2.00289	28.09	0.03	2.18	5598.6	6589.2	7493.6
1084	RDm17_03	90	N	1	4	5	1	1	1	893	21	M	English	N			NA	N	43	24		42	42	84	0.52381	0.69697	0.641026	Dm_scrm_9.12.16_03_8.10_scrm	9.8.17_01_5.11_dm17_scrm	9.8.17_01_5.11_dm17_scrm.wav	1.089	5786	7061	0.759	0.69697	5759.8	8770.2	3010.4	7381.5	762.93	72.5	2.75e-06	2.00289	28.09	0.03	2.18	5598.6	6589.2	7493.6
1085	RDm17_03	509	Y	1	2	3	1	1	1	518	28	M	Spanish/English	Y	Rhesus macaque, mangabey	48	48	Y	NA	NA		NA	NA	NA	0.464286	0.969697	0.615385	Dm_scrm_9.12.16_03_8.10_scrm	9.8.17_01_5.11_dm17_scrm	9.8.17_01_5.11_dm17_scrm.wav	1.089	5786	7061	0.759	0.69697	5759.8	8770.2	3010.4	7381.5	762.93	72.5	2.75e-06	2.00289	28.09	0.03	2.18	5598.6	6589.2	7493.6
1086	RDm17_03	51	N	1	3	28	1	1	1	1728	18	F	English	N			NA	Y	31	36		45	44	89	0.654762	0.515152	0.615385	Dm_scrm_9.12.16_03_8.10_scrm	9.8.17_01_5.11_dm17_scrm	9.8.17_01_5.11_dm17_scrm.wav	1.089	5786	7061	0.759	0.69697	5759.8	8770.2	3010.4	7381.5	762.93	72.5	2.75e-06	2.00289	28.09	0.03	2.18	5598.6	6589.2	7493.6
1087	RDm17_03	13	N	1	3	2	1	0	2	292	19	F	English	N			NA	N	21	34		42	41	83	0.5	0.666667	0.487179	Dm_scrm_9.12.16_03_8.10_scrm	9.8.17_01_5.11_dm17_scrm	9.8.17_01_5.11_dm17_scrm.wav	1.089	5786	7061	0.759	0.69697	5759.8	8770.2	3010.4	7381.5	762.93	72.5	2.75e-06	2.00289	28.09	0.03	2.18	5598.6	6589.2	7493.6
1088	RDm17_03	15	N	1	2	21	1	0	2	2156	20	F	English and Chinese	N			NA	Y	58	36	didn't make it to face - just voice	NA	36	NA	0.488095	0.393939	0.461538	Dm_scrm_9.12.16_03_8.10_scrm	9.8.17_01_5.11_dm17_scrm	9.8.17_01_5.11_dm17_scrm.wav	1.089	5786	7061	0.759	0.69697	5759.8	8770.2	3010.4	7381.5	762.93	72.5	2.75e-06	2.00289	28.09	0.03	2.18	5598.6	6589.2	7493.6
1089	RDm17_03	71	N	1	1	33	1	0	2	513	19	M	English	N			NA	Y	44	36		43	43	86	0.595238	0.424242	0.333333	Dm_scrm_9.12.16_03_8.10_scrm	9.8.17_01_5.11_dm17_scrm	9.8.17_01_5.11_dm17_scrm.wav	1.089	5786	7061	0.759	0.69697	5759.8	8770.2	3010.4	7381.5	762.93	72.5	2.75e-06	2.00289	28.09	0.03	2.18	5598.6	6589.2	7493.6
1090	RDm17_03	3	N	1	1	3	1	0	2	992	28	M	English	N			NA	Y	39	30		45	42	87	0.559524	0.575758	0.487179	Dm_scrm_9.12.16_03_8.10_scrm	9.8.17_01_5.11_dm17_scrm	9.8.17_01_5.11_dm17_scrm.wav	1.089	5786	7061	0.759	0.69697	5759.8	8770.2	3010.4	7381.5	762.93	72.5	2.75e-06	2.00289	28.09	0.03	2.18	5598.6	6589.2	7493.6
1091	RDm17_03	4	N	1	2	4	1	1	1	463	20	M	English	N			NA	N	43	38		27	24	51	0.559524	0.424242	0.589744	Dm_scrm_9.12.16_03_8.10_scrm	9.8.17_01_5.11_dm17_scrm	9.8.17_01_5.11_dm17_scrm.wav	1.089	5786	7061	0.759	0.69697	5759.8	8770.2	3010.4	7381.5	762.93	72.5	2.75e-06	2.00289	28.09	0.03	2.18	5598.6	6589.2	7493.6
1092	RDm17_03	86	N	1	3	37	1	1	1	1062	22	M	Chinese	N			NA	Y	44	35		NA	NA	NA	0.666667	0.515152	0.641026	Dm_scrm_9.12.16_03_8.10_scrm	9.8.17_01_5.11_dm17_scrm	9.8.17_01_5.11_dm17_scrm.wav	1.089	5786	7061	0.759	0.69697	5759.8	8770.2	3010.4	7381.5	762.93	72.5	2.75e-06	2.00289	28.09	0.03	2.18	5598.6	6589.2	7493.6
1093	RDm17_03	33	N	1	3	38	1	1	1	564	19	F	Mandarin + English	N			NA	Y	56	33		NA	NA	NA	0.571429	0.272727	0.615385	Dm_scrm_9.12.16_03_8.10_scrm	9.8.17_01_5.11_dm17_scrm	9.8.17_01_5.11_dm17_scrm.wav	1.089	5786	7061	0.759	0.69697	5759.8	8770.2	3010.4	7381.5	762.93	72.5	2.75e-06	2.00289	28.09	0.03	2.18	5598.6	6589.2	7493.6
1094	RDm17_03	78	N	1	1	25	1	0	2	380	20	M	Spanish	Y	dogs, snakes	2	NA	Y	45	35		NA	NA	NA	0.547619	0.424242	0.487179	Dm_scrm_9.12.16_03_8.10_scrm	9.8.17_01_5.11_dm17_scrm	9.8.17_01_5.11_dm17_scrm.wav	1.089	5786	7061	0.759	0.69697	5759.8	8770.2	3010.4	7381.5	762.93	72.5	2.75e-06	2.00289	28.09	0.03	2.18	5598.6	6589.2	7493.6
1095	RDm17_03	81	N	1	2	28	1	0	2	544	18	F	English	N			NA	Y	53	33		43	51	94	0.690476	0.454545	0.538462	Dm_scrm_9.12.16_03_8.10_scrm	9.8.17_01_5.11_dm17_scrm	9.8.17_01_5.11_dm17_scrm.wav	1.089	5786	7061	0.759	0.69697	5759.8	8770.2	3010.4	7381.5	762.93	72.5	2.75e-06	2.00289	28.09	0.03	2.18	5598.6	6589.2	7493.6
1096	RDm17_03	98	N	1	1	32	1	0	2	586	18	F	English	N			NA	Y	36	39		37	48	85	0.690476	0.393939	0.538462	Dm_scrm_9.12.16_03_8.10_scrm	9.8.17_01_5.11_dm17_scrm	9.8.17_01_5.11_dm17_scrm.wav	1.089	5786	7061	0.759	0.69697	5759.8	8770.2	3010.4	7381.5	762.93	72.5	2.75e-06	2.00289	28.09	0.03	2.18	5598.6	6589.2	7493.6
1097	RDm17_03	56	N	1	1	32	1	0	2	464	18	F	Chinese	N			NA	Y	31	30		NA	NA	NA	0.595238	0.575758	0.384615	Dm_scrm_9.12.16_03_8.10_scrm	9.8.17_01_5.11_dm17_scrm	9.8.17_01_5.11_dm17_scrm.wav	1.089	5786	7061	0.759	0.69697	5759.8	8770.2	3010.4	7381.5	762.93	72.5	2.75e-06	2.00289	28.09	0.03	2.18	5598.6	6589.2	7493.6
1098	RDm17_03	59	N	1	2	3	1	0	2	727	18	M	Gujarati	N			NA	N	37	38		NA	NA	NA	0.52381	0.393939	0.666667	Dm_scrm_9.12.16_03_8.10_scrm	9.8.17_01_5.11_dm17_scrm	9.8.17_01_5.11_dm17_scrm.wav	1.089	5786	7061	0.759	0.69697	5759.8	8770.2	3010.4	7381.5	762.93	72.5	2.75e-06	2.00289	28.09	0.03	2.18	5598.6	6589.2	7493.6
1099	RDm17_03	47	N	1	1	10	1	0	2	144	18	F	English	N			NA	Y	60	42		42	45	87	0.47619	0.30303	0.333333	Dm_scrm_9.12.16_03_8.10_scrm	9.8.17_01_5.11_dm17_scrm	9.8.17_01_5.11_dm17_scrm.wav	1.089	5786	7061	0.759	0.69697	5759.8	8770.2	3010.4	7381.5	762.93	72.5	2.75e-06	2.00289	28.09	0.03	2.18	5598.6	6589.2	7493.6
1100	RDm17_03	77	N	1	4	36	1	0	2	405	19	M	Chinese	N			NA	Y	46	18		NA	NA	NA	0.595238	0.454545	0.538462	Dm_scrm_9.12.16_03_8.10_scrm	9.8.17_01_5.11_dm17_scrm	9.8.17_01_5.11_dm17_scrm.wav	1.089	5786	7061	0.759	0.69697	5759.8	8770.2	3010.4	7381.5	762.93	72.5	2.75e-06	2.00289	28.09	0.03	2.18	5598.6	6589.2	7493.6
1101	RDm17_03	511	Y	1	4	3	1	0	2	1131	24	F	English	Y	Rhesus macaque, domestic cats	24	24	Y	NA	NA		NA	NA	NA	0.571429	0.69697	0.512821	Dm_scrm_9.12.16_03_8.10_scrm	9.8.17_01_5.11_dm17_scrm	9.8.17_01_5.11_dm17_scrm.wav	1.089	5786	7061	0.759	0.69697	5759.8	8770.2	3010.4	7381.5	762.93	72.5	2.75e-06	2.00289	28.09	0.03	2.18	5598.6	6589.2	7493.6
1102	RDm17_03	72	N	1	1	1	1	0	2	171	19	F	English	N			NA	Y	48	33		35	31	66	0.511905	0.69697	0.538462	Dm_scrm_9.12.16_03_8.10_scrm	9.8.17_01_5.11_dm17_scrm	9.8.17_01_5.11_dm17_scrm.wav	1.089	5786	7061	0.759	0.69697	5759.8	8770.2	3010.4	7381.5	762.93	72.5	2.75e-06	2.00289	28.09	0.03	2.18	5598.6	6589.2	7493.6
1103	RDm17_03	50	N	1	3	1	1	0	2	446	19	F	English	Y	dogs, cats	12	NA	Y	53	40		24	19	43	0.5	0.212121	0.512821	Dm_scrm_9.12.16_03_8.10_scrm	9.8.17_01_5.11_dm17_scrm	9.8.17_01_5.11_dm17_scrm.wav	1.089	5786	7061	0.759	0.69697	5759.8	8770.2	3010.4	7381.5	762.93	72.5	2.75e-06	2.00289	28.09	0.03	2.18	5598.6	6589.2	7493.6
1104	RDm17_03	99	N	1	2	3	1	0	2	483	19	F	English + Hindi	N			NA	Y	56	37		37	39	76	0.595238	0.30303	0.461538	Dm_scrm_9.12.16_03_8.10_scrm	9.8.17_01_5.11_dm17_scrm	9.8.17_01_5.11_dm17_scrm.wav	1.089	5786	7061	0.759	0.69697	5759.8	8770.2	3010.4	7381.5	762.93	72.5	2.75e-06	2.00289	28.09	0.03	2.18	5598.6	6589.2	7493.6
1105	RDm17_03	65	N	1	4	31	1	1	1	442	20	F	Arabic	Y			NA	N	36	35		NA	NA	NA	0.559524	0.363636	0.564103	Dm_scrm_9.12.16_03_8.10_scrm	9.8.17_01_5.11_dm17_scrm	9.8.17_01_5.11_dm17_scrm.wav	1.089	5786	7061	0.759	0.69697	5759.8	8770.2	3010.4	7381.5	762.93	72.5	2.75e-06	2.00289	28.09	0.03	2.18	5598.6	6589.2	7493.6
1106	RDm17_03	44	N	1	4	27	1	0	2	675	31	F	English	N			NA	Y	39	34		47	45	92	0.571429	0.606061	0.333333	Dm_scrm_9.12.16_03_8.10_scrm	9.8.17_01_5.11_dm17_scrm	9.8.17_01_5.11_dm17_scrm.wav	1.089	5786	7061	0.759	0.69697	5759.8	8770.2	3010.4	7381.5	762.93	72.5	2.75e-06	2.00289	28.09	0.03	2.18	5598.6	6589.2	7493.6
1107	RDm17_03	22	N	1	4	37	1	1	1	2426	31	F	English	Y	dogs, cats	6	NA	Y	56	49		47	46	93	0.452381	0.515152	0.692308	Dm_scrm_9.12.16_03_8.10_scrm	9.8.17_01_5.11_dm17_scrm	9.8.17_01_5.11_dm17_scrm.wav	1.089	5786	7061	0.759	0.69697	5759.8	8770.2	3010.4	7381.5	762.93	72.5	2.75e-06	2.00289	28.09	0.03	2.18	5598.6	6589.2	7493.6
1108	RDm17_03	97	N	1	3	21	1	0	2	688	19	F	English	N			NA	Y	48	28		40	43	83	0.595238	0.606061	0.487179	Dm_scrm_9.12.16_03_8.10_scrm	9.8.17_01_5.11_dm17_scrm	9.8.17_01_5.11_dm17_scrm.wav	1.089	5786	7061	0.759	0.69697	5759.8	8770.2	3010.4	7381.5	762.93	72.5	2.75e-06	2.00289	28.09	0.03	2.18	5598.6	6589.2	7493.6
1109	RDm17_03	26	N	1	4	18	1	0	2	971	24	M	Telugu	N			NA	N	41	35		NA	NA	NA	0.607143	0.515152	0.538462	Dm_scrm_9.12.16_03_8.10_scrm	9.8.17_01_5.11_dm17_scrm	9.8.17_01_5.11_dm17_scrm.wav	1.089	5786	7061	0.759	0.69697	5759.8	8770.2	3010.4	7381.5	762.93	72.5	2.75e-06	2.00289	28.09	0.03	2.18	5598.6	6589.2	7493.6
1110	RDm17_03	93	N	1	2	34	1	0	2	393	19	F	English	N			NA	Y	53	37		38	38	76	0.52381	0.30303	0.487179	Dm_scrm_9.12.16_03_8.10_scrm	9.8.17_01_5.11_dm17_scrm	9.8.17_01_5.11_dm17_scrm.wav	1.089	5786	7061	0.759	0.69697	5759.8	8770.2	3010.4	7381.5	762.93	72.5	2.75e-06	2.00289	28.09	0.03	2.18	5598.6	6589.2	7493.6
1111	RDm17_03	100	N	1	4	11	1	1	1	2323	21	F	Mandarin	N			NA	Y	50	36		NA	NA	NA	0.619048	0.424242	0.641026	Dm_scrm_9.12.16_03_8.10_scrm	9.8.17_01_5.11_dm17_scrm	9.8.17_01_5.11_dm17_scrm.wav	1.089	5786	7061	0.759	0.69697	5759.8	8770.2	3010.4	7381.5	762.93	72.5	2.75e-06	2.00289	28.09	0.03	2.18	5598.6	6589.2	7493.6
1112	RDm17_03	89	N	1	2	25	1	1	1	1083	18	F	Spanish	N			NA	Y	50	37		NA	NA	NA	0.619048	0.818182	0.589744	Dm_scrm_9.12.16_03_8.10_scrm	9.8.17_01_5.11_dm17_scrm	9.8.17_01_5.11_dm17_scrm.wav	1.089	5786	7061	0.759	0.69697	5759.8	8770.2	3010.4	7381.5	762.93	72.5	2.75e-06	2.00289	28.09	0.03	2.18	5598.6	6589.2	7493.6
1113	RDm17_03	37	N	1	4	29	1	0	2	856	19	F	Spanish	N			NA	Y	44	32		NA	NA	NA	0.52381	0.606061	0.641026	Dm_scrm_9.12.16_03_8.10_scrm	9.8.17_01_5.11_dm17_scrm	9.8.17_01_5.11_dm17_scrm.wav	1.089	5786	7061	0.759	0.69697	5759.8	8770.2	3010.4	7381.5	762.93	72.5	2.75e-06	2.00289	28.09	0.03	2.18	5598.6	6589.2	7493.6
1114	RDm17_03	30	N	1	3	13	1	0	2	365	19	F	Chinese	N			NA	N	43	31		NA	NA	NA	0.535714	0.151515	0.641026	Dm_scrm_9.12.16_03_8.10_scrm	9.8.17_01_5.11_dm17_scrm	9.8.17_01_5.11_dm17_scrm.wav	1.089	5786	7061	0.759	0.69697	5759.8	8770.2	3010.4	7381.5	762.93	72.5	2.75e-06	2.00289	28.09	0.03	2.18	5598.6	6589.2	7493.6
1115	RDm17_03	76	N	1	2	5	1	0	2	433	19	F	Chinese	N			NA	Y	41	41		NA	NA	NA	0.630952	0.393939	0.538462	Dm_scrm_9.12.16_03_8.10_scrm	9.8.17_01_5.11_dm17_scrm	9.8.17_01_5.11_dm17_scrm.wav	1.089	5786	7061	0.759	0.69697	5759.8	8770.2	3010.4	7381.5	762.93	72.5	2.75e-06	2.00289	28.09	0.03	2.18	5598.6	6589.2	7493.6
1116	RDm17_03	5	N	1	1	34	1	1	1	2550	29	F	English	Y	cat, dog, horse, cow	6+ years	NA	Y	41	35		46	49	95	0.583333	0.393939	0.564103	Dm_scrm_9.12.16_03_8.10_scrm	9.8.17_01_5.11_dm17_scrm	9.8.17_01_5.11_dm17_scrm.wav	1.089	5786	7061	0.759	0.69697	5759.8	8770.2	3010.4	7381.5	762.93	72.5	2.75e-06	2.00289	28.09	0.03	2.18	5598.6	6589.2	7493.6
1117	RDm17_03	8	N	1	3	31	1	1	1	370	19	F	English	Y	dogs, cats	24	NA	Y	58	40		39	43	82	0.595238	0.363636	0.589744	Dm_scrm_9.12.16_03_8.10_scrm	9.8.17_01_5.11_dm17_scrm	9.8.17_01_5.11_dm17_scrm.wav	1.089	5786	7061	0.759	0.69697	5759.8	8770.2	3010.4	7381.5	762.93	72.5	2.75e-06	2.00289	28.09	0.03	2.18	5598.6	6589.2	7493.6
1118	RDm17_03	75	N	1	4	7	1	0	2	411	19	M	Chinese	Y	fruitfly, termites	1.5	NA	N	58	38		NA	NA	NA	0.547619	0.484848	0.461538	Dm_scrm_9.12.16_03_8.10_scrm	9.8.17_01_5.11_dm17_scrm	9.8.17_01_5.11_dm17_scrm.wav	1.089	5786	7061	0.759	0.69697	5759.8	8770.2	3010.4	7381.5	762.93	72.5	2.75e-06	2.00289	28.09	0.03	2.18	5598.6	6589.2	7493.6
1119	RDm17_03	505	Y	1	3	30	1	1	1	807	30	F	English	Y	Rhesus macaque, horses, dogs, cats, birds, mangabey	120	94	Y	NA	NA		NA	NA	NA	0.595238	1	0.589744	Dm_scrm_9.12.16_03_8.10_scrm	9.8.17_01_5.11_dm17_scrm	9.8.17_01_5.11_dm17_scrm.wav	1.089	5786	7061	0.759	0.69697	5759.8	8770.2	3010.4	7381.5	762.93	72.5	2.75e-06	2.00289	28.09	0.03	2.18	5598.6	6589.2	7493.6
1120	RDm17_03	506	Y	1	3	27	1	1	1	315	37	F	English	Y	Rhesus macaque	120	120	Y	NA	NA		NA	NA	NA	0.559524	0.424242	0.487179	Dm_scrm_9.12.16_03_8.10_scrm	9.8.17_01_5.11_dm17_scrm	9.8.17_01_5.11_dm17_scrm.wav	1.089	5786	7061	0.759	0.69697	5759.8	8770.2	3010.4	7381.5	762.93	72.5	2.75e-06	2.00289	28.09	0.03	2.18	5598.6	6589.2	7493.6
1121	RDm17_03	7	N	1	4	25	1	1	1	492	21	F	English	N			NA	Y	49	33		44	43	87	0.583333	0.363636	0.615385	Dm_scrm_9.12.16_03_8.10_scrm	9.8.17_01_5.11_dm17_scrm	9.8.17_01_5.11_dm17_scrm.wav	1.089	5786	7061	0.759	0.69697	5759.8	8770.2	3010.4	7381.5	762.93	72.5	2.75e-06	2.00289	28.09	0.03	2.18	5598.6	6589.2	7493.6
1122	RDm17_03	43	N	1	1	19	1	1	1	873	19	M	English	N			NA	Y	37	39		36	40	76	0.595238	0.666667	0.589744	Dm_scrm_9.12.16_03_8.10_scrm	9.8.17_01_5.11_dm17_scrm	9.8.17_01_5.11_dm17_scrm.wav	1.089	5786	7061	0.759	0.69697	5759.8	8770.2	3010.4	7381.5	762.93	72.5	2.75e-06	2.00289	28.09	0.03	2.18	5598.6	6589.2	7493.6
1123	RDm17_03	61	N	1	3	23	1	0	2	192	19	M	English	N			NA	Y	42	36		43	35	78	0.619048	0.424242	0.461538	Dm_scrm_9.12.16_03_8.10_scrm	9.8.17_01_5.11_dm17_scrm	9.8.17_01_5.11_dm17_scrm.wav	1.089	5786	7061	0.759	0.69697	5759.8	8770.2	3010.4	7381.5	762.93	72.5	2.75e-06	2.00289	28.09	0.03	2.18	5598.6	6589.2	7493.6
1124	RDm17_03	67	N	1	4	31	1	0	2	844	18	F	English	N			NA	N	29	44		32	32	64	0.75	0.636364	0.564103	Dm_scrm_9.12.16_03_8.10_scrm	9.8.17_01_5.11_dm17_scrm	9.8.17_01_5.11_dm17_scrm.wav	1.089	5786	7061	0.759	0.69697	5759.8	8770.2	3010.4	7381.5	762.93	72.5	2.75e-06	2.00289	28.09	0.03	2.18	5598.6	6589.2	7493.6
1125	RDm17_03	109	N	1	2	18	1	0	2	551	20	F	English	N			NA	Y	41	33		45	43	88	0.666667	0.727273	0.384615	Dm_scrm_9.12.16_03_8.10_scrm	9.8.17_01_5.11_dm17_scrm	9.8.17_01_5.11_dm17_scrm.wav	1.089	5786	7061	0.759	0.69697	5759.8	8770.2	3010.4	7381.5	762.93	72.5	2.75e-06	2.00289	28.09	0.03	2.18	5598.6	6589.2	7493.6
1126	RDm17_04	27	N	1	1	35	2	1	2	300	23	F	Telugu	N			NA	N	32	44		NA	NA	NA	0.547619	0.151515	0.512821	2.17.17_03_26.17_dm17_scrms_01	Hair_11.14.16_01_12.27_dm17_scrm+gruntsxxxxx	2.17.17_03_26.17_dm17_scrms_01.wav	0.503	4629	3039	0.395	0.785288	3001.4	4954.9	1953.5	4190.2	501	94	1.13e-05	1.87253	14.26	0.06	4.98	3789.8	4349.7	5383.3
1127	RDm17_04	33	N	1	3	9	2	1	2	367	19	F	Mandarin + English	N			NA	Y	56	33		NA	NA	NA	0.571429	0.272727	0.615385	2.17.17_03_26.17_dm17_scrms_01	Hair_11.14.16_01_12.27_dm17_scrm+gruntsxxxxx	2.17.17_03_26.17_dm17_scrms_01.wav	0.503	4629	3039	0.395	0.785288	3001.4	4954.9	1953.5	4190.2	501	94	1.13e-05	1.87253	14.26	0.06	4.98	3789.8	4349.7	5383.3
1128	RDm17_04	41	N	1	2	6	2	0	1	870	20	M	Vietnamese	N			NA	Y	45	29		NA	NA	NA	0.630952	0.454545	0.435897	2.17.17_03_26.17_dm17_scrms_01	Hair_11.14.16_01_12.27_dm17_scrm+gruntsxxxxx	2.17.17_03_26.17_dm17_scrms_01.wav	0.503	4629	3039	0.395	0.785288	3001.4	4954.9	1953.5	4190.2	501	94	1.13e-05	1.87253	14.26	0.06	4.98	3789.8	4349.7	5383.3
1129	RDm17_04	17	N	1	4	11	2	1	2	923	19	F	Chinese	N			NA	Y	49	34		NA	NA	NA	0.595238	1	0.487179	2.17.17_03_26.17_dm17_scrms_01	Hair_11.14.16_01_12.27_dm17_scrm+gruntsxxxxx	2.17.17_03_26.17_dm17_scrms_01.wav	0.503	4629	3039	0.395	0.785288	3001.4	4954.9	1953.5	4190.2	501	94	1.13e-05	1.87253	14.26	0.06	4.98	3789.8	4349.7	5383.3
1130	RDm17_04	62	N	1	1	1	2	1	2	690	18	F	English	Y	mice	1	NA	Y	59	32		46	40	86	0.559524	0.484848	0.538462	2.17.17_03_26.17_dm17_scrms_01	Hair_11.14.16_01_12.27_dm17_scrm+gruntsxxxxx	2.17.17_03_26.17_dm17_scrms_01.wav	0.503	4629	3039	0.395	0.785288	3001.4	4954.9	1953.5	4190.2	501	94	1.13e-05	1.87253	14.26	0.06	4.98	3789.8	4349.7	5383.3
1131	RDm17_04	114	N	1	3	37	2	1	2	632	19	M	English	N			NA	Y	58	35		36	38	74	0.607143	0.393939	0.512821	2.17.17_03_26.17_dm17_scrms_01	Hair_11.14.16_01_12.27_dm17_scrm+gruntsxxxxx	2.17.17_03_26.17_dm17_scrms_01.wav	0.503	4629	3039	0.395	0.785288	3001.4	4954.9	1953.5	4190.2	501	94	1.13e-05	1.87253	14.26	0.06	4.98	3789.8	4349.7	5383.3
1132	RDm17_04	43	N	1	1	31	2	0	1	767	19	M	English	N			NA	Y	37	39		36	40	76	0.595238	0.666667	0.589744	2.17.17_03_26.17_dm17_scrms_01	Hair_11.14.16_01_12.27_dm17_scrm+gruntsxxxxx	2.17.17_03_26.17_dm17_scrms_01.wav	0.503	4629	3039	0.395	0.785288	3001.4	4954.9	1953.5	4190.2	501	94	1.13e-05	1.87253	14.26	0.06	4.98	3789.8	4349.7	5383.3
1133	RDm17_04	74	N	1	3	19	2	1	2	516	19	F	English	Y	cats, dogs	1	NA	Y	47	41		41	43	84	0.428571	0.272727	0.538462	2.17.17_03_26.17_dm17_scrms_01	Hair_11.14.16_01_12.27_dm17_scrm+gruntsxxxxx	2.17.17_03_26.17_dm17_scrms_01.wav	0.503	4629	3039	0.395	0.785288	3001.4	4954.9	1953.5	4190.2	501	94	1.13e-05	1.87253	14.26	0.06	4.98	3789.8	4349.7	5383.3
1134	RDm17_04	102	N	1	3	18	2	1	2	479	18	F	English	Y	elephants, dogs, tortoises	3	NA	Y	46	44		33	36	69	0.559524	0.424242	0.461538	2.17.17_03_26.17_dm17_scrms_01	Hair_11.14.16_01_12.27_dm17_scrm+gruntsxxxxx	2.17.17_03_26.17_dm17_scrms_01.wav	0.503	4629	3039	0.395	0.785288	3001.4	4954.9	1953.5	4190.2	501	94	1.13e-05	1.87253	14.26	0.06	4.98	3789.8	4349.7	5383.3
1135	RDm17_04	36	N	1	2	19	2	1	2	411	19	F	English	Y	dogs, cats	4	NA	Y	53	31		42	42	84	0.416667	0.606061	0.435897	2.17.17_03_26.17_dm17_scrms_01	Hair_11.14.16_01_12.27_dm17_scrm+gruntsxxxxx	2.17.17_03_26.17_dm17_scrms_01.wav	0.503	4629	3039	0.395	0.785288	3001.4	4954.9	1953.5	4190.2	501	94	1.13e-05	1.87253	14.26	0.06	4.98	3789.8	4349.7	5383.3
1136	RDm17_04	4	N	1	2	15	2	0	1	59	20	M	English	N			NA	N	43	38		27	24	51	0.559524	0.424242	0.589744	2.17.17_03_26.17_dm17_scrms_01	Hair_11.14.16_01_12.27_dm17_scrm+gruntsxxxxx	2.17.17_03_26.17_dm17_scrms_01.wav	0.503	4629	3039	0.395	0.785288	3001.4	4954.9	1953.5	4190.2	501	94	1.13e-05	1.87253	14.26	0.06	4.98	3789.8	4349.7	5383.3
1137	RDm17_04	84	N	1	1	37	2	1	2	483	19	F	English	N			NA	Y	34	36		35	37	72	0.547619	0.575758	0.512821	2.17.17_03_26.17_dm17_scrms_01	Hair_11.14.16_01_12.27_dm17_scrm+gruntsxxxxx	2.17.17_03_26.17_dm17_scrms_01.wav	0.503	4629	3039	0.395	0.785288	3001.4	4954.9	1953.5	4190.2	501	94	1.13e-05	1.87253	14.26	0.06	4.98	3789.8	4349.7	5383.3
1138	RDm17_04	64	N	1	2	8	2	1	2	579	18	F	English	N			NA	N	55	36		40	42	82	0.654762	0.393939	0.666667	2.17.17_03_26.17_dm17_scrms_01	Hair_11.14.16_01_12.27_dm17_scrm+gruntsxxxxx	2.17.17_03_26.17_dm17_scrms_01.wav	0.503	4629	3039	0.395	0.785288	3001.4	4954.9	1953.5	4190.2	501	94	1.13e-05	1.87253	14.26	0.06	4.98	3789.8	4349.7	5383.3
1139	RDm17_04	15	N	1	2	25	2	1	2	1178	20	F	English and Chinese	N			NA	Y	58	36	didn't make it to face - just voice	NA	36	NA	0.488095	0.393939	0.461538	2.17.17_03_26.17_dm17_scrms_01	Hair_11.14.16_01_12.27_dm17_scrm+gruntsxxxxx	2.17.17_03_26.17_dm17_scrms_01.wav	0.503	4629	3039	0.395	0.785288	3001.4	4954.9	1953.5	4190.2	501	94	1.13e-05	1.87253	14.26	0.06	4.98	3789.8	4349.7	5383.3
1140	RDm17_04	88	N	1	2	8	2	1	2	302	19	M	Mandarin	N			NA	Y	49	27		NA	NA	NA	0.547619	0.818182	0.538462	2.17.17_03_26.17_dm17_scrms_01	Hair_11.14.16_01_12.27_dm17_scrm+gruntsxxxxx	2.17.17_03_26.17_dm17_scrms_01.wav	0.503	4629	3039	0.395	0.785288	3001.4	4954.9	1953.5	4190.2	501	94	1.13e-05	1.87253	14.26	0.06	4.98	3789.8	4349.7	5383.3
1141	RDm17_04	509	Y	1	2	16	2	0	1	543	28	M	Spanish/English	Y	Rhesus macaque, mangabey	48	48	Y	NA	NA		NA	NA	NA	0.464286	0.969697	0.615385	2.17.17_03_26.17_dm17_scrms_01	Hair_11.14.16_01_12.27_dm17_scrm+gruntsxxxxx	2.17.17_03_26.17_dm17_scrms_01.wav	0.503	4629	3039	0.395	0.785288	3001.4	4954.9	1953.5	4190.2	501	94	1.13e-05	1.87253	14.26	0.06	4.98	3789.8	4349.7	5383.3
1142	RDm17_04	20	Y	1	3	21	2	1	2	770	37	F	English	Y	Rhesus, chimpanzees, dogs, cats, mice, rats	180	132	Y	52	33		46	47	93	0.392857	0.454545	0.589744	2.17.17_03_26.17_dm17_scrms_01	Hair_11.14.16_01_12.27_dm17_scrm+gruntsxxxxx	2.17.17_03_26.17_dm17_scrms_01.wav	0.503	4629	3039	0.395	0.785288	3001.4	4954.9	1953.5	4190.2	501	94	1.13e-05	1.87253	14.26	0.06	4.98	3789.8	4349.7	5383.3
1143	RDm17_04	95	N	1	1	11	2	1	2	358	20	F	English	N			NA	Y	57	30		39	44	83	0.571429	0.363636	0.564103	2.17.17_03_26.17_dm17_scrms_01	Hair_11.14.16_01_12.27_dm17_scrm+gruntsxxxxx	2.17.17_03_26.17_dm17_scrms_01.wav	0.503	4629	3039	0.395	0.785288	3001.4	4954.9	1953.5	4190.2	501	94	1.13e-05	1.87253	14.26	0.06	4.98	3789.8	4349.7	5383.3
1144	RDm17_04	58	N	1	2	25	2	0	1	570	21	F	Spanish	Y	mice, rats	2	NA	Y	53	33		NA	NA	NA	0.547619	0.515152	0.461538	2.17.17_03_26.17_dm17_scrms_01	Hair_11.14.16_01_12.27_dm17_scrm+gruntsxxxxx	2.17.17_03_26.17_dm17_scrms_01.wav	0.503	4629	3039	0.395	0.785288	3001.4	4954.9	1953.5	4190.2	501	94	1.13e-05	1.87253	14.26	0.06	4.98	3789.8	4349.7	5383.3
1145	RDm17_04	40	N	1	1	35	2	1	2	341	19	F	Chinese	N			NA	N	39	39		NA	NA	NA	0.666667	0.515152	0.512821	2.17.17_03_26.17_dm17_scrms_01	Hair_11.14.16_01_12.27_dm17_scrm+gruntsxxxxx	2.17.17_03_26.17_dm17_scrms_01.wav	0.503	4629	3039	0.395	0.785288	3001.4	4954.9	1953.5	4190.2	501	94	1.13e-05	1.87253	14.26	0.06	4.98	3789.8	4349.7	5383.3
1146	RDm17_04	111	N	1	2	30	2	1	2	489	21	F	English	N			NA	N	39	39		40	36	76	0.511905	0.575758	0.512821	2.17.17_03_26.17_dm17_scrms_01	Hair_11.14.16_01_12.27_dm17_scrm+gruntsxxxxx	2.17.17_03_26.17_dm17_scrms_01.wav	0.503	4629	3039	0.395	0.785288	3001.4	4954.9	1953.5	4190.2	501	94	1.13e-05	1.87253	14.26	0.06	4.98	3789.8	4349.7	5383.3
1147	RDm17_04	502	Y	1	4	18	2	0	1	2491	39	F	English	Y	Rhesus, pigrails, gorillas, orangutans, lemurs	216	204	Y	63	30		45	43	88	0.642857	0.909091	0.666667	2.17.17_03_26.17_dm17_scrms_01	Hair_11.14.16_01_12.27_dm17_scrm+gruntsxxxxx	2.17.17_03_26.17_dm17_scrms_01.wav	0.503	4629	3039	0.395	0.785288	3001.4	4954.9	1953.5	4190.2	501	94	1.13e-05	1.87253	14.26	0.06	4.98	3789.8	4349.7	5383.3
1148	RDm17_04	512	Y	1	1	14	2	0	1	387	39	M	English	Y	Rhesus macaque, pigtail macaque, common chimpanzee, west lowland gorilla, Sooty mangabey	144	144	Y	NA	NA	occasionally needed to answer radio during task	NA	NA	NA	0.642857	1	0.589744	2.17.17_03_26.17_dm17_scrms_01	Hair_11.14.16_01_12.27_dm17_scrm+gruntsxxxxx	2.17.17_03_26.17_dm17_scrms_01.wav	0.503	4629	3039	0.395	0.785288	3001.4	4954.9	1953.5	4190.2	501	94	1.13e-05	1.87253	14.26	0.06	4.98	3789.8	4349.7	5383.3
1149	RDm17_04	13	N	1	3	12	2	1	2	899	19	F	English	N			NA	N	21	34		42	41	83	0.5	0.666667	0.487179	2.17.17_03_26.17_dm17_scrms_01	Hair_11.14.16_01_12.27_dm17_scrm+gruntsxxxxx	2.17.17_03_26.17_dm17_scrms_01.wav	0.503	4629	3039	0.395	0.785288	3001.4	4954.9	1953.5	4190.2	501	94	1.13e-05	1.87253	14.26	0.06	4.98	3789.8	4349.7	5383.3
1150	RDm17_04	65	N	1	4	29	2	0	1	654	20	F	Arabic	Y			NA	N	36	35		NA	NA	NA	0.559524	0.363636	0.564103	2.17.17_03_26.17_dm17_scrms_01	Hair_11.14.16_01_12.27_dm17_scrm+gruntsxxxxx	2.17.17_03_26.17_dm17_scrms_01.wav	0.503	4629	3039	0.395	0.785288	3001.4	4954.9	1953.5	4190.2	501	94	1.13e-05	1.87253	14.26	0.06	4.98	3789.8	4349.7	5383.3
1151	RDm17_04	76	N	1	2	32	2	1	2	733	19	F	Chinese	N			NA	Y	41	41		NA	NA	NA	0.630952	0.393939	0.538462	2.17.17_03_26.17_dm17_scrms_01	Hair_11.14.16_01_12.27_dm17_scrm+gruntsxxxxx	2.17.17_03_26.17_dm17_scrms_01.wav	0.503	4629	3039	0.395	0.785288	3001.4	4954.9	1953.5	4190.2	501	94	1.13e-05	1.87253	14.26	0.06	4.98	3789.8	4349.7	5383.3
1152	RDm17_04	63	N	1	3	38	2	0	1	1910	19	F	English	N			NA	N	60	40		44	42	86	0.535714	0	0.717949	2.17.17_03_26.17_dm17_scrms_01	Hair_11.14.16_01_12.27_dm17_scrm+gruntsxxxxx	2.17.17_03_26.17_dm17_scrms_01.wav	0.503	4629	3039	0.395	0.785288	3001.4	4954.9	1953.5	4190.2	501	94	1.13e-05	1.87253	14.26	0.06	4.98	3789.8	4349.7	5383.3
1153	RDm17_04	91	N	1	4	15	2	1	2	1216	20	F	Chinese	N			NA	N	49	36		NA	NA	NA	0.547619	0.606061	0.641026	2.17.17_03_26.17_dm17_scrms_01	Hair_11.14.16_01_12.27_dm17_scrm+gruntsxxxxx	2.17.17_03_26.17_dm17_scrms_01.wav	0.503	4629	3039	0.395	0.785288	3001.4	4954.9	1953.5	4190.2	501	94	1.13e-05	1.87253	14.26	0.06	4.98	3789.8	4349.7	5383.3
1154	RDm17_04	54	N	1	3	3	2	0	1	1259	18	F	Chinese	N			NA	N	35	41		NA	NA	NA	0.535714	0.424242	0.538462	2.17.17_03_26.17_dm17_scrms_01	Hair_11.14.16_01_12.27_dm17_scrm+gruntsxxxxx	2.17.17_03_26.17_dm17_scrms_01.wav	0.503	4629	3039	0.395	0.785288	3001.4	4954.9	1953.5	4190.2	501	94	1.13e-05	1.87253	14.26	0.06	4.98	3789.8	4349.7	5383.3
1155	RDm17_04	508	Y	1	1	6	2	1	2	1324	40	F	English	Y	Rhesus macaque, pigtail macaque, sooty mangabey	192	120	Y	NA	NA		NA	NA	NA	0.511905	0.969697	0.641026	2.17.17_03_26.17_dm17_scrms_01	Hair_11.14.16_01_12.27_dm17_scrm+gruntsxxxxx	2.17.17_03_26.17_dm17_scrms_01.wav	0.503	4629	3039	0.395	0.785288	3001.4	4954.9	1953.5	4190.2	501	94	1.13e-05	1.87253	14.26	0.06	4.98	3789.8	4349.7	5383.3
1156	RDm17_04	19	N	1	4	9	2	1	2	480	51	F	English	Y	mice	240	NA	Y	36	29		43	47	90	0.511905	0.575758	0.487179	2.17.17_03_26.17_dm17_scrms_01	Hair_11.14.16_01_12.27_dm17_scrm+gruntsxxxxx	2.17.17_03_26.17_dm17_scrms_01.wav	0.503	4629	3039	0.395	0.785288	3001.4	4954.9	1953.5	4190.2	501	94	1.13e-05	1.87253	14.26	0.06	4.98	3789.8	4349.7	5383.3
1157	RDm17_04	82	N	1	1	1	2	0	1	867	18	F	Korean	Y	dogs, cats	3	NA	Y	31	40		NA	NA	NA	0.559524	0.333333	0.641026	2.17.17_03_26.17_dm17_scrms_01	Hair_11.14.16_01_12.27_dm17_scrm+gruntsxxxxx	2.17.17_03_26.17_dm17_scrms_01.wav	0.503	4629	3039	0.395	0.785288	3001.4	4954.9	1953.5	4190.2	501	94	1.13e-05	1.87253	14.26	0.06	4.98	3789.8	4349.7	5383.3
1158	RDm17_04	29	N	1	3	11	2	1	2	853	19	F	English	Y	dogs, cats	3	NA	Y	63	44		47	41	88	0.547619	0.454545	0.512821	2.17.17_03_26.17_dm17_scrms_01	Hair_11.14.16_01_12.27_dm17_scrm+gruntsxxxxx	2.17.17_03_26.17_dm17_scrms_01.wav	0.503	4629	3039	0.395	0.785288	3001.4	4954.9	1953.5	4190.2	501	94	1.13e-05	1.87253	14.26	0.06	4.98	3789.8	4349.7	5383.3
1159	RDm17_04	92	N	1	3	18	2	1	2	492	18	F	English	N			NA	Y	45	30		36	36	72	0.595238	0.212121	0.589744	2.17.17_03_26.17_dm17_scrms_01	Hair_11.14.16_01_12.27_dm17_scrm+gruntsxxxxx	2.17.17_03_26.17_dm17_scrms_01.wav	0.503	4629	3039	0.395	0.785288	3001.4	4954.9	1953.5	4190.2	501	94	1.13e-05	1.87253	14.26	0.06	4.98	3789.8	4349.7	5383.3
1160	RDm17_04	79	N	1	2	27	2	0	1	251	21	M	English	N			NA	Y	55	38		33	34	67	0.571429	0.393939	0.564103	2.17.17_03_26.17_dm17_scrms_01	Hair_11.14.16_01_12.27_dm17_scrm+gruntsxxxxx	2.17.17_03_26.17_dm17_scrms_01.wav	0.503	4629	3039	0.395	0.785288	3001.4	4954.9	1953.5	4190.2	501	94	1.13e-05	1.87253	14.26	0.06	4.98	3789.8	4349.7	5383.3
1161	RDm17_04	34	N	1	1	30	2	0	1	263	24	M	Mandarin	N			NA	N	15	37		NA	NA	NA	0.511905	0.757576	0.282051	2.17.17_03_26.17_dm17_scrms_01	Hair_11.14.16_01_12.27_dm17_scrm+gruntsxxxxx	2.17.17_03_26.17_dm17_scrms_01.wav	0.503	4629	3039	0.395	0.785288	3001.4	4954.9	1953.5	4190.2	501	94	1.13e-05	1.87253	14.26	0.06	4.98	3789.8	4349.7	5383.3
1162	RDm17_04	110	N	1	4	4	2	0	1	770	19	M	English	N			NA	Y	40	32		35	38	73	0.511905	0.69697	0.564103	2.17.17_03_26.17_dm17_scrms_01	Hair_11.14.16_01_12.27_dm17_scrm+gruntsxxxxx	2.17.17_03_26.17_dm17_scrms_01.wav	0.503	4629	3039	0.395	0.785288	3001.4	4954.9	1953.5	4190.2	501	94	1.13e-05	1.87253	14.26	0.06	4.98	3789.8	4349.7	5383.3
1163	RDm17_04	107	N	1	2	21	2	0	1	1121	22	F	Chinese	N			NA	N	21	37		NA	NA	NA	0.595238	0.424242	0.435897	2.17.17_03_26.17_dm17_scrms_01	Hair_11.14.16_01_12.27_dm17_scrm+gruntsxxxxx	2.17.17_03_26.17_dm17_scrms_01.wav	0.503	4629	3039	0.395	0.785288	3001.4	4954.9	1953.5	4190.2	501	94	1.13e-05	1.87253	14.26	0.06	4.98	3789.8	4349.7	5383.3
1164	RDm17_04	98	N	1	1	5	2	1	2	479	18	F	English	N			NA	Y	36	39		37	48	85	0.690476	0.393939	0.538462	2.17.17_03_26.17_dm17_scrms_01	Hair_11.14.16_01_12.27_dm17_scrm+gruntsxxxxx	2.17.17_03_26.17_dm17_scrms_01.wav	0.503	4629	3039	0.395	0.785288	3001.4	4954.9	1953.5	4190.2	501	94	1.13e-05	1.87253	14.26	0.06	4.98	3789.8	4349.7	5383.3
1165	RDm17_04	78	N	1	1	28	2	1	2	457	20	M	Spanish	Y	dogs, snakes	2	NA	Y	45	35		NA	NA	NA	0.547619	0.424242	0.487179	2.17.17_03_26.17_dm17_scrms_01	Hair_11.14.16_01_12.27_dm17_scrm+gruntsxxxxx	2.17.17_03_26.17_dm17_scrms_01.wav	0.503	4629	3039	0.395	0.785288	3001.4	4954.9	1953.5	4190.2	501	94	1.13e-05	1.87253	14.26	0.06	4.98	3789.8	4349.7	5383.3
1166	RDm17_04	39	N	1	4	30	2	1	2	473	19	F	Spanish/English	N			NA	Y	55	38		41	43	84	0.583333	0.454545	0.538462	2.17.17_03_26.17_dm17_scrms_01	Hair_11.14.16_01_12.27_dm17_scrm+gruntsxxxxx	2.17.17_03_26.17_dm17_scrms_01.wav	0.503	4629	3039	0.395	0.785288	3001.4	4954.9	1953.5	4190.2	501	94	1.13e-05	1.87253	14.26	0.06	4.98	3789.8	4349.7	5383.3
1167	RDm17_04	55	N	1	1	16	2	0	1	935	18	F	Mandarin	N			NA	Y	64	30		NA	NA	NA	0.690476	0.515152	0.410256	2.17.17_03_26.17_dm17_scrms_01	Hair_11.14.16_01_12.27_dm17_scrm+gruntsxxxxx	2.17.17_03_26.17_dm17_scrms_01.wav	0.503	4629	3039	0.395	0.785288	3001.4	4954.9	1953.5	4190.2	501	94	1.13e-05	1.87253	14.26	0.06	4.98	3789.8	4349.7	5383.3
1168	RDm17_04	103	N	1	1	37	2	1	2	472	19	F	Korean + English	Y	dogs, cats	3	NA	Y	47	39		40	41	81	0.52381	0.393939	0.512821	2.17.17_03_26.17_dm17_scrms_01	Hair_11.14.16_01_12.27_dm17_scrm+gruntsxxxxx	2.17.17_03_26.17_dm17_scrms_01.wav	0.503	4629	3039	0.395	0.785288	3001.4	4954.9	1953.5	4190.2	501	94	1.13e-05	1.87253	14.26	0.06	4.98	3789.8	4349.7	5383.3
1169	RDm17_04	50	N	1	3	22	2	1	2	360	19	F	English	Y	dogs, cats	12	NA	Y	53	40		24	19	43	0.5	0.212121	0.512821	2.17.17_03_26.17_dm17_scrms_01	Hair_11.14.16_01_12.27_dm17_scrm+gruntsxxxxx	2.17.17_03_26.17_dm17_scrms_01.wav	0.503	4629	3039	0.395	0.785288	3001.4	4954.9	1953.5	4190.2	501	94	1.13e-05	1.87253	14.26	0.06	4.98	3789.8	4349.7	5383.3
1170	RDm17_04	71	N	1	1	14	2	1	2	734	19	M	English	N			NA	Y	44	36		43	43	86	0.595238	0.424242	0.333333	2.17.17_03_26.17_dm17_scrms_01	Hair_11.14.16_01_12.27_dm17_scrm+gruntsxxxxx	2.17.17_03_26.17_dm17_scrms_01.wav	0.503	4629	3039	0.395	0.785288	3001.4	4954.9	1953.5	4190.2	501	94	1.13e-05	1.87253	14.26	0.06	4.98	3789.8	4349.7	5383.3
1171	RDm17_04	510	Y	1	4	9	2	0	1	7235	30	M	English	Y	Rhesus macaque, Sooty mangabey	60	60	Y	NA	NA	asked for more clarification on "intense emotion" ~3 min into task	NA	NA	NA	0.511905	0.727273	0.717949	2.17.17_03_26.17_dm17_scrms_01	Hair_11.14.16_01_12.27_dm17_scrm+gruntsxxxxx	2.17.17_03_26.17_dm17_scrms_01.wav	0.503	4629	3039	0.395	0.785288	3001.4	4954.9	1953.5	4190.2	501	94	1.13e-05	1.87253	14.26	0.06	4.98	3789.8	4349.7	5383.3
1172	RDm17_04	61	N	1	3	39	2	1	2	133	19	M	English	N			NA	Y	42	36		43	35	78	0.619048	0.424242	0.461538	2.17.17_03_26.17_dm17_scrms_01	Hair_11.14.16_01_12.27_dm17_scrm+gruntsxxxxx	2.17.17_03_26.17_dm17_scrms_01.wav	0.503	4629	3039	0.395	0.785288	3001.4	4954.9	1953.5	4190.2	501	94	1.13e-05	1.87253	14.26	0.06	4.98	3789.8	4349.7	5383.3
1173	RDm17_04	80	N	1	1	39	2	0	1	739	18	F	English	N			NA	Y	57	34		36	3	39	0.607143	0.545455	0.358974	2.17.17_03_26.17_dm17_scrms_01	Hair_11.14.16_01_12.27_dm17_scrm+gruntsxxxxx	2.17.17_03_26.17_dm17_scrms_01.wav	0.503	4629	3039	0.395	0.785288	3001.4	4954.9	1953.5	4190.2	501	94	1.13e-05	1.87253	14.26	0.06	4.98	3789.8	4349.7	5383.3
1174	RDm17_04	16	N	1	2	31	2	0	1	1132	21	F	English	Y	dogs, cats	6	NA	Y	44	43		38	40	78	0.559524	0.545455	0.461538	2.17.17_03_26.17_dm17_scrms_01	Hair_11.14.16_01_12.27_dm17_scrm+gruntsxxxxx	2.17.17_03_26.17_dm17_scrms_01.wav	0.503	4629	3039	0.395	0.785288	3001.4	4954.9	1953.5	4190.2	501	94	1.13e-05	1.87253	14.26	0.06	4.98	3789.8	4349.7	5383.3
1175	RDm17_04	11	N	1	2	11	2	1	2	1822	20	F	English (mainly) + Hindi	Y	dogs	6	NA	Y	66	45	noted w/ regard to coos that it is upsetting - sounds like they're in pain. Noted surpirse that screams would be more intense context than coos	34	41	75	0.666667	0.545455	0.641026	2.17.17_03_26.17_dm17_scrms_01	Hair_11.14.16_01_12.27_dm17_scrm+gruntsxxxxx	2.17.17_03_26.17_dm17_scrms_01.wav	0.503	4629	3039	0.395	0.785288	3001.4	4954.9	1953.5	4190.2	501	94	1.13e-05	1.87253	14.26	0.06	4.98	3789.8	4349.7	5383.3
1176	RDm17_04	115	N	1	1	9	2	1	2	627	18	M	Mandarin	N			NA	N	31	37		NA	NA	NA	0.583333	0.575758	0.461538	2.17.17_03_26.17_dm17_scrms_01	Hair_11.14.16_01_12.27_dm17_scrm+gruntsxxxxx	2.17.17_03_26.17_dm17_scrms_01.wav	0.503	4629	3039	0.395	0.785288	3001.4	4954.9	1953.5	4190.2	501	94	1.13e-05	1.87253	14.26	0.06	4.98	3789.8	4349.7	5383.3
[truncated: 3,699 more rows]
[truncated: 53 more columns]
